# Supplementary material for: A Time-Course Study of the Expression Level of Synaptic Plasticity-Associated Genes in Un-Lesioned Spinal Cord and Brain Areas in a Rat Model of Spinal Cord Injury: A Bioinformatic Approach
Source: MDPI journal article supplement (doi:10.3390/ijms22168606), 2021-08-10
Supplement: s1 [file s1]

## Supplementary Materials:

# A Time-Course Study of the Expression Level of Synaptic Plasticity-Associated Genes in Un-Lesioned Spinal Cord and Brain Areas in a Rat Model of Spinal Cord Injury: A Bioinformatic Approach.

Baldassaro V.A.<sup>1, 2</sup>, Sanna M.<sup>3, 2</sup>,  
Bighinati A.<sup>1</sup>, Sannia M.<sup>3</sup>, Gusciglio M.<sup>4</sup>, Giardino L.<sup>1, 3, 4</sup>,  
Lorenzini L.<sup>1, 3, 5</sup>, Calzà L.<sup>3, 6, 7, 5</sup>

Version Typeset August 2021

---

<sup>1</sup>Department of Veterinary Medical Science, University of Bologna, 40064 Ozzano Emilia, Bologna, Italy

<sup>2</sup>These authors equally contributed to the study

<sup>3</sup>Interdepartmental Center for Industrial Research in Life Sciences and Technologies, University of Bologna, 40064 Ozzano Emilia, Bologna, Italy

<sup>4</sup>IRET Foundation, 40064 Ozzano Emilia, Bologna, Italy

<sup>5</sup>These authors share senior authorship

<sup>6</sup>Montecatone Rehabilitation Institute, 40026 Imola, Bologna, Italy

<sup>7</sup>Department of Pharmacy and BioTechnology, University of Bologna, 40127 Bologna, Italy

# Contents

|          |                                                      |            |
|----------|------------------------------------------------------|------------|
| <b>1</b> | <b>Supplementary Tables</b>                          | <b>3</b>   |
| 1.1      | RT <sup>2</sup> Profiler PCR Array . . . . .         | 3          |
| 1.2      | GSEA Results Tables . . . . .                        | 6          |
| <b>2</b> | <b>Supplementary Figures</b>                         | <b>310</b> |
| 2.1      | Pearson Correlation Plots . . . . .                  | 310        |
| 2.2      | NES vs Significance Plots . . . . .                  | 312        |
| 2.3      | Leading Edge Analysis . . . . .                      | 315        |
| 2.4      | Deregulated Pathways EN Plots and Heatmaps . . . . . | 317        |
| 2.4.1    | SC rostral 1 DPL Peak Pathways . . . . .             | 317        |
| 2.4.2    | SC rostral 8 DPL Peak Pathways . . . . .             | 321        |
| 2.4.3    | SC rostral 45 DPL Peak Pathways . . . . .            | 322        |
| 2.4.4    | SC caudal 1 DPL Peak Pathways . . . . .              | 327        |
| 2.4.5    | SC caudal 8 DPL Peak Pathways . . . . .              | 331        |
| 2.4.6    | CTX-M 1 DPL Peak Pathways . . . . .                  | 336        |
| 2.4.7    | CTX-M 8 DPL Peak Pathways . . . . .                  | 340        |
| 2.4.8    | BG 45 DPL Peak Pathways . . . . .                    | 342        |
| 2.4.9    | CB 8 DPL Pathways . . . . .                          | 344        |
| 2.4.10   | CB 45 DPL Peak Pathways . . . . .                    | 345        |

# 1 Supplementary Tables

## 1.1 RT<sup>2</sup> Profiler PCR Array

**Supplementary Table S1:** PARN-126ZA Genes Array Table.

|    | Position | Unigene   | Refseq       | Symbol | Description                                       |
|----|----------|-----------|--------------|--------|---------------------------------------------------|
| 0  | A01      | Rn.42924  | NM_019254    | Adam10 | ADAM metallopeptidase domain 10                   |
| 1  | A02      | Rn.214145 | NM_001107239 | Adcy1  | Adenylate cyclase 1 (brain)                       |
| 2  | A03      | Rn.10382  | NM_017142    | Adcy8  | Adenylate cyclase 8 (brain)                       |
| 3  | A04      | Rn.11422  | NM_033230    | Akt1   | V-akt murine thymoma viral oncogene homolog 1     |
| 4  | A05      | Rn.10086  | NM_019361    | Arc    | Activity-regulated cytoskeleton-associated pro... |
| 5  | A06      | Rn.11266  | NM_012513    | Bdnf   | Brain-derived neurotrophic factor                 |
| 6  | A07      | Rn.107499 | NM_012920    | Camk2a | Calcium/calmodulin-dependent protein kinase II... |
| 7  | A08      | Rn.10961  | NM_133605    | Camk2g | Calcium/calmodulin-dependent protein kinase II... |
| 8  | A09      | Rn.23200  | NM_031333    | Cdh2   | Cadherin 2                                        |
| 9  | A10      | Rn.6479   | NM_024125    | Cebpb  | CCAAT/enhancer binding protein (C/EBP), beta      |
| 10 | A11      | Rn.6975   | NM_013154    | Cebpd  | CCAAT/enhancer binding protein (C/EBP), delta     |
| 11 | A12      | Rn.89774  | NM_012784    | Cnr1   | Cannabinoid receptor 1 (brain)                    |
| 12 | B01      | Rn.90061  | NM_031017    | Creb1  | CAMP responsive element binding protein 1         |
| 13 | B02      | Rn.10251  | NM_001110860 | Crem   | CAMP responsive element modulator                 |
| 14 | B03      | Rn.9765   | NM_019621    | Dlg4   | Discs, large homolog 4 (Drosophila)               |
| 15 | B04      | Rn.9096   | NM_012551    | Egr1   | Early growth response 1                           |
| 16 | B05      | Rn.89235  | NM_053633    | Egr2   | Early growth response 2                           |
| 17 | B06      | Rn.44371  | NM_017086    | Egr3   | Early growth response 3                           |
| 18 | B07      | Rn.31998  | NM_019137    | Egr4   | Early growth response 4                           |
| 19 | B08      | Rn.229866 | NM_001127319 | Ephb2  | Eph receptor B2                                   |
| 20 | B09      | Rn.103750 | NM_022197    | Fos    | FBJ osteosarcoma oncogene                         |
| 21 | B10      | Rn.10368  | NM_017295    | Gabra5 | Gamma-aminobutyric acid (GABA) A receptor, alp... |
| 22 | B11      | Rn.11391  | NM_013145    | Gnai1  | Guanine nucleotide binding protein (G protein)... |
| 23 | B12      | Rn.29971  | NM_031608    | Gria1  | Glutamate receptor, ionotropic, AMPA 1            |
| 24 | C01      | Rn.91361  | NM_017261    | Gria2  | Glutamate receptor, ionotropic, AMPA 2            |
| 25 | C02      | Rn.74049  | NM_032990    | Gria3  | Glutamate receptor, ionotropic, AMPA 3            |
| 26 | C03      | Rn.10938  | NM_017263    | Gria4  | Glutamate receptor, ionotropic, AMPA 4            |
| 27 | C04      | Rn.9840   | NM_017010    | Grin1  | Glutamate receptor, ionotropic, N-methyl D-asp... |
| 28 | C05      | Rn.9710   | NM_012573    | Grin2a | Glutamate receptor, ionotropic, N-methyl D-asp... |
| 29 | C06      | Rn.9711   | NM_012574    | Grin2b | Glutamate receptor, ionotropic, N-methyl D-asp... |
| 30 | C07      | Rn.9709   | NM_012575    | Grin2c | Glutamate receptor, ionotropic, N-methyl D-asp... |
| 31 | C08      | Rn.91209  | NM_022797    | Grin2d | Glutamate receptor, ionotropic, N-methyl D-asp... |

Continuation of Table S1

|    | Position | Unigene   | Refseq       | Symbol   | Description                                       |
|----|----------|-----------|--------------|----------|---------------------------------------------------|
| 32 | C09      | Rn.74240  | NM_032069    | Grip1    | Glutamate receptor interacting protein 1          |
| 33 | C10      | Rn.87787  | NM_017011    | Grm1     | Glutamate receptor, metabotropic 1                |
| 34 | C11      | Rn.9681   | NM_001105711 | Grm2     | Glutamate receptor, metabotropic 2                |
| 35 | C12      | Rn.41715  | NM_001105712 | Grm3     | Glutamate receptor, metabotropic 3                |
| 36 | D01      | Rn.89046  | NM_022666    | Grm4     | Glutamate receptor, metabotropic 4                |
| 37 | D02      | Rn.29972  | NM_017012    | Grm5     | Glutamate receptor, metabotropic 5                |
| 38 | D03      | Rn.10409  | NM_031040    | Grm7     | Glutamate receptor, metabotropic 7                |
| 39 | D04      | Rn.44420  | NM_022202    | Grm8     | Glutamate receptor, metabotropic 8                |
| 40 | D05      | Rn.37500  | NM_031707    | Homer1   | Homer homolog 1 (Drosophila)                      |
| 41 | D06      | Rn.228346 | NM_178866    | Igf1     | Insulin-like growth factor 1                      |
| 42 | D07      | Rn.9874   | NM_017128    | Inhba    | Inhibin beta-A                                    |
| 43 | D08      | Rn.93714  | NM_021835    | Jun      | Jun oncogene                                      |
| 44 | D09      | Rn.15806  | NM_021836    | Junb     | Jun B proto-oncogene                              |
| 45 | D10      | Rn.2398   | NM_031135    | Klf10    | Kruppel-like factor 10                            |
| 46 | D11      | Rn.34914  | NM_053842    | Mapk1    | Mitogen activated protein kinase 1                |
| 47 | D12      | Rn.10209  | NM_031055    | Mmp9     | Matrix metalloproteinase 9                        |
| 48 | E01      | Rn.11283  | NM_031521    | Ncam1    | Neural cell adhesion molecule 1                   |
| 49 | E02      | Rn.2411   | NM_001276711 | Nfkb1    | Nuclear factor of kappa light polypeptide gene... |
| 50 | E03      | Rn.8395   | NM_030867    | Nfkbib   | Nuclear factor of kappa light polypeptide gene... |
| 51 | E04      | Rn.22168  | NM_001277055 | Ngf      | Nerve growth factor (beta polypeptide)            |
| 52 | E05      | Rn.10980  | NM_012610    | Ngfr     | Nerve growth factor receptor (TNFR superfamily... |
| 53 | E06      | Rn.10573  | NM_052799    | Nos1     | Nitric oxide synthase 1, neuronal                 |
| 54 | E07      | Rn.162101 | NM_001034199 | Nptx2    | Neuronal pentraxin 2                              |
| 55 | E08      | Rn.10000  | NM_024388    | Nr4a1    | Nuclear receptor subfamily 4, group A, member 1   |
| 56 | E09      | Rn.9715   | NM_031073    | Ntf3     | Neurotrophin 3                                    |
| 57 | E10      | Rn.44225  | NM_013184    | Ntf4     | Neurotrophin 4                                    |
| 58 | E11      | Rn.11246  | NM_012731    | Ntrk2    | Neurotrophic tyrosine kinase, receptor, type 2    |
| 59 | E12      | Rn.23337  | NM_022868    | Pcdh8    | Protocadherin 8                                   |
| 60 | F01      | Rn.24750  | NM_053460    | Pick1    | Protein interacting with PRKCA 1                  |
| 61 | F02      | Rn.34888  | NM_017034    | Pim1     | Pim-1 oncogene                                    |
| 62 | F03      | Rn.107102 | NM_013151    | Plat     | Plasminogen activator, tissue                     |
| 63 | F04      | Rn.11243  | NM_013187    | Plcg1    | Phospholipase C, gamma 1                          |
| 64 | F05      | Rn.2024   | NM_031527    | Ppp1ca   | Protein phosphatase 1, catalytic subunit, alph... |
| 65 | F06      | Rn.1495   | NM_022498    | Ppp1cc   | Protein phosphatase 1, catalytic subunit, gamm... |
| 66 | F07      | Rn.73852  | NM_130403    | Ppp1r14a | Protein phosphatase 1, regulatory (inhibitor) ... |
| 67 | F08      | Rn.1271   | NM_017039    | Ppp2ca   | Protein phosphatase 2, catalytic subunit, alph... |
| 68 | F09      | Rn.6866   | NM_017041    | Ppp3ca   | Protein phosphatase 3, catalytic subunit, alph... |

Continuation of Table S1

|    | Position | Unigene   | Refseq       | Symbol | Description                                       |
|----|----------|-----------|--------------|--------|---------------------------------------------------|
| 69 | F10      | Rn.86669  | NM_001105713 | Prkca  | Protein kinase C, alpha                           |
| 70 | F11      | Rn.9747   | NM_012628    | Prkcg  | Protein kinase C, gamma                           |
| 71 | F12      | Rn.204724 | NM_001105731 | Prkg1  | Protein kinase, cGMP-dependent, type 1            |
| 72 | G01      | Rn.44409  | NM_013018    | Rab3a  | RAB3A, member RAS oncogene family                 |
| 73 | G02      | Rn.19480  | NM_199267    | Rela   | V-rel reticuloendotheliosis viral oncogene hom... |
| 74 | G03      | Rn.98353  | NM_080394    | Reln   | Reelin                                            |
| 75 | G04      | NaN       | XM_003750065 | Kif17  | Kinesin family member 17                          |
| 76 | G05      | Rn.1892   | NM_053453    | Rgs2   | Regulator of G-protein signaling 2                |
| 77 | G06      | Rn.859    | NM_013216    | Rheb   | Ras homolog enriched in brain                     |
| 78 | G07      | NaN       | NM_001107627 | Sirt1  | Sirtuin (silent mating type information regula... |
| 79 | G08      | Rn.1501   | NM_001109302 | Srf    | Serum response factor (c-fos serum response el... |
| 80 | G09      | Rn.42910  | NM_021695    | Synpo  | Synaptopodin                                      |
| 81 | G10      | Rn.25754  | NM_053819    | Timp1  | TIMP metalloproteinase inhibitor 1                |
| 82 | G11      | Rn.2275   | NM_012675    | Tnf    | Tumor necrosis factor (TNF superfamily, member 2) |
| 83 | G12      | Rn.2502   | NM_013053    | Ywhaq  | Tyrosine 3-monooxygenase/tryptophan 5-monooxyg... |
| 84 | H01      | Rn.94978  | NM_031144    | Actb   | Actin, beta                                       |
| 85 | H02      | Rn.1868   | NM_012512    | B2m    | Beta-2 microglobulin                              |
| 86 | H03      | Rn.47     | NM_012583    | Hprt1  | Hypoxanthine phosphoribosyltransferase 1          |
| 87 | H04      | Rn.107896 | NM_017025    | Ldha   | Lactate dehydrogenase A                           |
| 88 | H05      | Rn.973    | NM_001007604 | Rplp1  | Ribosomal protein, large, P1                      |
| 89 | H06      | NaN       | U26919       | RGDC   | Rat Genomic DNA Contamination                     |
| 90 | H07      | NaN       | SA_00104     | RTC    | Reverse Transcription Control                     |
| 91 | H08      | NaN       | SA_00104     | RTC    | Reverse Transcription Control                     |
| 92 | H09      | NaN       | SA_00104     | RTC    | Reverse Transcription Control                     |
| 93 | H10      | NaN       | SA_00103     | PPC    | Positive PCR Control                              |
| 94 | H11      | NaN       | SA_00103     | PPC    | Positive PCR Control                              |
| 95 | H12      | NaN       | SA_00103     | PPC    | Positive PCR Control                              |

## 1.2 GSEA Results Tables

**Supplementary Table S2:** SC rostral segment early (1 DPL peak) profile GSEA results.

| Begin of Table S2 |                                                    |               |      |          |          |           |           |            |
|-------------------|----------------------------------------------------|---------------|------|----------|----------|-----------|-----------|------------|
|                   | NAME                                               | ID            | SIZE | ES       | NES      | NOM.p.val | FDR.q.val | FWER.p.val |
| 0                 | REACTOME_INTERLEUKIN_4_AND_INTERLEUKIN_13_SIGN...  | R-RNO-6785807 | 8    | 0.922751 | 2.960325 | 0.000000  | 0.001343  | 0.001      |
| 1                 | REACTOME_SIGNALING_BY_INTERLEUKINS                 | R-RNO-449147  | 15   | 0.590450 | 2.482950 | 0.000000  | 0.022870  | 0.036      |
| 2                 | HALLMARK_TNFA_SIGNALING_VIA_NFKB                   | M5890         | 14   | 0.591473 | 2.428519 | 0.000000  | 0.020713  | 0.048      |
| 3                 | GOBP_NEGATIVE_REGULATION_OF_PEPTIDASE_ACTIVITY     | GO:0010466    | 6    | 0.832010 | 2.357697 | 0.000000  | 0.026939  | 0.082      |
| 4                 | GOBP_OSTEOCLAST_DIFFERENTIATION                    | GO:0030316    | 6    | 0.807556 | 2.354578 | 0.000000  | 0.021834  | 0.082      |
| 5                 | REACTOME_TRANSCRIPTIONAL_REGULATION_OF_WHITE_A...  | R-RNO-381340  | 6    | 0.807932 | 2.300164 | 0.000000  | 0.027823  | 0.125      |
| 6                 | GOBP_OSSIFICATION                                  | GO:0001503    | 9    | 0.624718 | 2.155755 | 0.003165  | 0.069799  | 0.320      |
| 7                 | GOBP_NEGATIVE_REGULATION_OF_CYSTEINE_TYPE_ENDO...  | GO:2000117    | 5    | 0.793688 | 2.100962 | 0.002740  | 0.090920  | 0.439      |
| 8                 | GOBP_MYELOID_LEUKOCYTE_DIFFERENTIATION             | GO:0002573    | 11   | 0.594451 | 2.088907 | 0.003676  | 0.086556  | 0.455      |
| 9                 | GOBP_MYELOID_CELL_DIFFERENTIATION                  | GO:0030099    | 13   | 0.502879 | 2.049608 | 0.000000  | 0.097413  | 0.537      |
| 10                | GOBP_CYTOKINE_MEDIATED_SIGNALING_PATHWAY           | GO:0019221    | 16   | 0.477029 | 2.027812 | 0.000000  | 0.101125  | 0.582      |
| 11                | GOBP_REGULATION_OF_OSTEOCLAST_DIFFERENTIATION      | GO:0045670    | 5    | 0.768624 | 1.968335 | 0.011869  | 0.129783  | 0.705      |
| 12                | GOBP_REGULATION_OF_MYELOID_LEUKOCYTE_DIFFERENT...  | GO:0002761    | 8    | 0.575237 | 1.918722 | 0.003067  | 0.159148  | 0.815      |
| 13                | GOBP_SKIN_DEVELOPMENT                              | GO:0043588    | 5    | 0.734940 | 1.912148 | 0.011905  | 0.152929  | 0.824      |
| 14                | GOBP_RESPONSE_TO_MECHANICAL_STIMULUS               | GO:0009612    | 6    | 0.682927 | 1.906121 | 0.006329  | 0.146871  | 0.829      |
| 15                | REACTOME_DEATH_RECEPTOR_SIGNALING                  | R-RNO-73887   | 5    | 0.737505 | 1.901219 | 0.017143  | 0.141962  | 0.840      |
| 16                | GOBP_RESPONSE_TO_ENDOGENOUS_STIMULUS               | GO:0009719    | 34   | 0.344841 | 1.889355 | 0.000000  | 0.142666  | 0.855      |
| 17                | GOBP_POSITIVE_REGULATION_OF_CELL_DIFFERENTIATION   | GO:0004597    | 27   | 0.368842 | 1.875748 | 0.000000  | 0.145758  | 0.875      |
| 18                | GOBP_NEGATIVE_REGULATION_OF_CELL_POPULATION_PR...  | GO:0008285    | 9    | 0.534148 | 1.871449 | 0.007042  | 0.141389  | 0.879      |
| 19                | GOBP_POSITIVE_REGULATION_OF_DEVELOPMENTAL_PROCE... | GO:0051094    | 32   | 0.350193 | 1.864965 | 0.000000  | 0.139355  | 0.882      |
| 20                | GOBP_IMMUNE_SYSTEM_DEVELOPMENT                     | GO:0002520    | 17   | 0.432172 | 1.854994 | 0.004219  | 0.139355  | 0.894      |
| 21                | GOBP_REGULATION_OF_CELL_DIFFERENTIATION            | GO:0004595    | 36   | 0.329660 | 1.825157 | 0.000000  | 0.156730  | 0.930      |
| 22                | GOBP_RESPONSE_TO_CYTOKINE                          | GO:0034097    | 23   | 0.378370 | 1.813332 | 0.004484  | 0.161851  | 0.948      |
| 23                | REACTOME_CYTOKINE_SIGNALING_IN_IMMUNE_SYSTEM       | R-RNO-1280215 | 21   | 0.379680 | 1.812935 | 0.012195  | 0.155586  | 0.948      |
| 24                | GOBP_INFLAMMATORY_RESPONSE                         | GO:0006954    | 12   | 0.471001 | 1.808953 | 0.018939  | 0.151975  | 0.950      |
| 25                | GOBP_NEGATIVE_REGULATION_OF_PROTEOLYSIS            | GO:0045861    | 8    | 0.548667 | 1.755278 | 0.028269  | 0.194117  | 0.983      |
| 26                | GOBP_LEUKOCYTE_DIFFERENTIATION                     | GO:0002521    | 15   | 0.423575 | 1.754041 | 0.003953  | 0.188277  | 0.984      |
| 27                | REACTOME_NGIF_STIMULATED_TRANSCRIPTION             | R-RNO-9031628 | 9    | 0.518987 | 1.738173 | 0.023649  | 0.197365  | 0.992      |
| 28                | GOBP_OSTEOBLAST_DIFFERENTIATION                    | GO:0001649    | 5    | 0.664689 | 1.726725 | 0.011050  | 0.201508  | 0.993      |
| 29                | GOBP_CELL_POPULATION_PROLIFERATION                 | GO:0008283    | 32   | 0.316965 | 1.716461 | 0.005464  | 0.205741  | 0.993      |
| 30                | GOBP_REGULATION_OF_LEUKOCYTE_DIFFERENTIATION       | GO:1902105    | 9    | 0.491450 | 1.685974 | 0.036545  | 0.233448  | 1.000      |
| 31                | GOBP_REGULATION_OF_MYELOID_CELL_DIFFERENTIATION    | GO:00045637   | 9    | 0.488989 | 1.680686 | 0.032609  | 0.232190  | 1.000      |
| 32                | HALLMARK_EPITHELIAL_MESENCHYMAL_TRANSITION         | M5930         | 5    | 0.650602 | 1.679643 | 0.021277  | 0.226711  | 1.000      |
| 33                | GOBP_PRL_MIRNA_TRANSCRIPTION_BY_RNA_POLYMERASE_II  | GO:0061614    | 7    | 0.543210 | 1.663227 | 0.036585  | 0.238343  | 1.000      |
| 34                | GOBP_POSITIVE_REGULATION_OF_BIOSYNTHETIC_PROCESS   | GO:0009891    | 27   | 0.323659 | 1.642793 | 0.017094  | 0.256950  | 1.000      |
| 35                | GOBP_POSITIVE_REGULATION_OF_NUCLEOBASE_CONTAIN...  | GO:0045935    | 28   | 0.318819 | 1.635624 | 0.015000  | 0.258728  | 1.000      |
| 36                | GOBP_POSITIVE_REGULATION_OF_PRL_MIRNA_TRANSCRIP... | GO:1902895    | 7    | 0.543210 | 1.631699 | 0.024390  | 0.257242  | 1.000      |
| 37                | GOBP_ACTIN_FILAMENT_BASED_PROCESS                  | GO:0030029    | 7    | 0.541508 | 1.617816 | 0.022876  | 0.266744  | 1.000      |
| 38                | GOBP_REGULATION_OF_DEFENSE_RESPONSE                | GO:0031347    | 7    | 0.509083 | 1.574683 | 0.042980  | 0.318328  | 1.000      |
| 39                | HALLMARK_HYPOXIA                                   | M5891         | 5    | 0.612647 | 1.565726 | 0.056886  | 0.324307  | 1.000      |
| 40                | GOBP_NEGATIVE_REGULATION_OF_CELL_DEATH             | GO:0060548    | 22   | 0.331603 | 1.557555 | 0.035176  | 0.328949  | 1.000      |

Continuation of Table S2

| NAME | ID                                                | SIZE | ES        | NES      | NOM.p.val | FDR.q.val | FWER.p.val |
|------|---------------------------------------------------|------|-----------|----------|-----------|-----------|------------|
| 41   | GOBP-INTRINSIC-APOPTOTIC-SIGNALING-PATHWAY        | 5    | 0.595854  | 1.543189 | 0.045872  | 0.343915  | 1.000      |
| 42   | GOBP-POSITIVE-REGULATION-OF-AXONOGENESIS          | 5    | 0.602410  | 1.536202 | 0.065527  | 0.346841  | 1.000      |
| 43   | GOBP-REGULATION-OF-HEMOPOIESIS                    | 10   | 0.424029  | 1.535530 | 0.052117  | 0.340095  | 1.000      |
| 44   | GOBP-MULTIMULTICELLULAR-ORGANISM-PROCESS          | 8    | 0.471437  | 1.531031 | 0.043210  | 0.339680  | 1.000      |
| 45   | GOBP-REGULATION-OF-CELL-SIZE                      | 5    | 0.590361  | 1.530751 | 0.054795  | 0.332738  | 1.000      |
| 46   | GOBP-POSITIVE-REGULATION-OF-TRANSCRIPTION-BY-R... | 24   | 0.310715  | 1.511869 | 0.030973  | 0.355268  | 1.000      |
| 47   | GOBP-NEURON-APOPTOTIC-PROCESS                     | 12   | 0.394737  | 1.490223 | 0.060000  | 0.383582  | 1.000      |
| 48   | GOBP-REGULATION-OF-INFLAMMATORY-RESPONSE          | 7    | 0.509083  | 1.488370 | 0.084112  | 0.378639  | 1.000      |
| 49   | GOBP-REGULATION-OF-CELL-DEATH                     | 34   | 0.276107  | 1.488344 | 0.031963  | 0.371139  | 1.000      |
| 50   | GOBP-POSITIVE-REGULATION-OF-MYELOID-CELL-DIFFE... | 7    | 0.490488  | 1.482751 | 0.070968  | 0.372727  | 1.000      |
| 51   | GOBP-POSITIVE-REGULATION-OF-SMOOTH-MUSCLE-CELL... | 5    | 0.566265  | 1.474395 | 0.081159  | 0.379650  | 1.000      |
| 52   | HALLMARK-ALLOGRAFT-REJECTION                      | 7    | 0.497605  | 1.468273 | 0.069079  | 0.383234  | 1.000      |
| 53   | GOBP-POSITIVE-REGULATION-OF-PEPTIDYL-TYROSINE...  | 8    | 0.462500  | 1.465458 | 0.080645  | 0.381109  | 1.000      |
| 54   | GOBP-POSITIVE-REGULATION-OF-CYTOKINE-PRODUCTION   | 7    | 0.481481  | 1.459276 | 0.066667  | 0.383954  | 1.000      |
| 55   | GOBP-MONONUCLEAR-CELL-DIFFERENTIATION             | 7    | 0.481482  | 1.454565 | 0.085044  | 0.384875  | 1.000      |
| 56   | GOBP-REGULATION-OF-FAT-CELL-DIFFERENTIATION       | 6    | 0.498263  | 1.425424 | 0.111765  | 0.429799  | 1.000      |
| 57   | GOBP-LEUKOCYTE-CELL-ADHESION                      | 6    | 0.500000  | 1.408764 | 0.090634  | 0.454834  | 1.000      |
| 58   | GOBP-RESPONSE-TO-NUTRIENT                         | 5    | 0.536494  | 1.405000 | 0.139535  | 0.454337  | 1.000      |
| 59   | GOBP-EPITHELIAL-CELL-DIFFERENTIATION              | 7    | 0.453790  | 1.400421 | 0.115385  | 0.455335  | 1.000      |
| 60   | GOBP-POSITIVE-REGULATION-OF-MYELOID-LEUKOCYTE...  | 6    | 0.503944  | 1.393833 | 0.120370  | 0.460239  | 1.000      |
| 61   | GOBP-RESPONSE-TO-REACTIVE-OXYGEN-SPECIES          | 8    | 0.423541  | 1.392840 | 0.101045  | 0.454990  | 1.000      |
| 62   | GOBP-REGULATION-OF-PEPTIDYL-SERINE-PHOSPHORYLA... | 8    | 0.434007  | 1.371879 | 0.110769  | 0.488968  | 1.000      |
| 63   | GOBP-POSITIVE-REGULATION-OF-PEPTIDYL-SERINE-PH... | 8    | 0.434007  | 1.369715 | 0.125767  | 0.486112  | 1.000      |
| 64   | GOBP-EMBRYONIC-ORGAN-DEVELOPMENT                  | 7    | 0.466098  | 1.369663 | 0.132911  | 0.478670  | 1.000      |
| 65   | REACTOME-CELLULAR-SENESCENCE                      | 6    | 0.482887  | 1.369502 | 0.125000  | 0.471748  | 1.000      |
| 66   | GOBP-RESPONSE-TO-OXIDATIVE-STRESS                 | 8    | 0.423541  | 1.360988 | 0.102564  | 0.482503  | 1.000      |
| 67   | GOBP-RESPONSE-TO-EXTRACELLULAR-STIMULUS           | 13   | 0.339525  | 1.35283  | 0.093525  | 0.480482  | 1.000      |
| 68   | GOBP-EMBRYO-DEVELOPMENT                           | 14   | 0.334556  | 1.356936 | 0.106061  | 0.476183  | 1.000      |
| 69   | GOBP-POSITIVE-REGULATION-OF-DEFENSE-RESPONSE      | 5    | 0.523801  | 1.356082 | 0.119403  | 0.471085  | 1.000      |
| 70   | GOBP-CELLULAR-RESPONSE-TO-EXTERNAL-STIMULUS       | 10   | 0.384817  | 1.346553 | 0.131673  | 0.482679  | 1.000      |
| 71   | GOBP-NEGATIVE-REGULATION-OF-TRANSCRIPTION-BY-R... | 10   | 0.387147  | 1.345786 | 0.136364  | 0.477689  | 1.000      |
| 72   | REACTOME-SENESCENCE-ASSOCIATED-SECRETORY-PHENO... | 6    | 0.482887  | 1.335211 | 0.145161  | 0.490903  | 1.000      |
| 73   | GOBP-RHYTHMIC-PROCESS                             | 15   | 0.322410  | 1.332421 | 0.120536  | 0.489551  | 1.000      |
| 74   | GOBP-NEGATIVE-REGULATION-OF-IMMUNE-SYSTEM-PROCESS | 5    | 0.501871  | 1.329278 | 0.147929  | 0.488887  | 1.000      |
| 75   | GOBP-RESPONSE-TO-UV                               | 5    | 0.511987  | 1.326654 | 0.165680  | 0.487851  | 1.000      |
| 76   | GOBP-PERIPHERAL-NERVOUS-SYSTEM-DEVELOPMENT        | 9    | 0.405063  | 1.320125 | 0.127517  | 0.494279  | 1.000      |
| 77   | GOBP-NEGATIVE-REGULATION-OF-HYDROLASE-ACTIVITY    | 11   | 0.348567  | 1.317281 | 0.115672  | 0.493901  | 1.000      |
| 78   | GOBP-TISSUE-MORPHOGENESIS                         | 7    | 0.4048729 | 1.317193 | 0.161491  | 0.487898  | 1.000      |
| 79   | GOBP-POSITIVE-REGULATION-OF-CELL-CELL-ADHESION    | 5    | 0.493976  | 1.309491 | 0.140056  | 0.496777  | 1.000      |
| 80   | GOBP-NERVE-DEVELOPMENT                            | 9    | 0.392405  | 1.304619 | 0.154605  | 0.500199  | 1.000      |
| 81   | GOBP-REGULATION-OF-PEPTIDASE-ACTIVITY             | 10   | 0.364257  | 1.298780 | 0.142415  | 0.506125  | 1.000      |
| 82   | GOBP-NEGATIVE-REGULATION-OF-LOCOMOTION            | 5    | 0.496870  | 1.292414 | 0.174286  | 0.512766  | 1.000      |
| 83   | GOBP-CELLULAR-RESPONSE-TO-EXTRACELLULAR-STIMULUS  | 8    | 0.405901  | 1.292190 | 0.160883  | 0.506961  | 1.000      |



Continuation of Table S2

| NAME | ID                                                 | SIZE | ES       | NES      | NOM.p.val | FDR.q.val | FWER.p.val |
|------|----------------------------------------------------|------|----------|----------|-----------|-----------|------------|
| 84   | GOBP-POSITIVE-REGULATION_OF_LEUKOCYTE-CELL...      | 5    | 0.493976 | 1.290738 | 0.183976  | 0.503834  | 1.000      |
| 85   | GOBP-NEGATIVE-REGULATION_OF_NEURON-APOPTOTIC.P...  | 8    | 0.387500 | 1.288778 | 0.151515  | 0.502360  | 1.000      |
| 86   | GOBP-REPRODUCTIVE-SYSTEM-DEVELOPMENT               | 6    | 0.450016 | 1.273961 | 0.166667  | 0.526424  | 1.000      |
| 87   | GOBP-REGULATION_OF_MULTICELLULAR-ORGANISMAL.DE...  | 31   | 0.233392 | 1.270299 | 0.135678  | 0.528107  | 1.000      |
| 88   | GOBP-POSITIVE-REGULATION_OF_TRANSMEMBRANE-TRAN...  | 7    | 0.432099 | 1.264628 | 0.179191  | 0.533287  | 1.000      |
| 89   | GOBP-REGULATION_OF_AXONOGENESIS                    | 7    | 0.432099 | 1.261935 | 0.147059  | 0.533245  | 1.000      |
| 90   | GOBP-MEMBRANE-PROTEIN-PROTEOLYSIS                  | 6    | 0.455071 | 1.258937 | 0.179331  | 0.533337  | 1.000      |
| 91   | GOBP-REGULATION_OF_LYMPHOCYTE-ACTIVATION           | 5    | 0.493976 | 1.258292 | 0.189441  | 0.529065  | 1.000      |
| 92   | GOBP-POSITIVE-REGULATION_OF_HEMOPOIESIS            | 7    | 0.412196 | 1.251139 | 0.179487  | 0.538978  | 1.000      |
| 93   | GOBP-DEFENSE-RESPONSE                              | 19   | 0.268609 | 1.228177 | 0.200913  | 0.581761  | 1.000      |
| 94   | GOBP-PROTEIN-AUTOPHOSPHORYLATION                   | 5    | 0.457831 | 1.225862 | 0.204748  | 0.580963  | 1.000      |
| 95   | GOBP-HOMEOSTASIS_OF_NUMBER_OF_CELLS                | 5    | 0.469880 | 1.215091 | 0.229508  | 0.597441  | 1.000      |
| 96   | HALLMARK_UV_RESPONSE_UP                            | 5    | 0.474630 | 1.214075 | 0.218182  | 0.593256  | 1.000      |
| 97   | GOBP-POSITIVE-REGULATION_OF_DEVELOPMENTAL-GROWTH   | 8    | 0.382169 | 1.211029 | 0.229102  | 0.594144  | 1.000      |
| 98   | GOBP-CELLULAR-RESPONSE_TO_CADMIUM-ION              | 5    | 0.470236 | 1.209200 | 0.219585  | 0.591583  | 1.000      |
| 99   | GOBP-EPITHELIAL-DEVELOPMENT                        | 15   | 0.286735 | 1.201919 | 0.198606  | 0.601240  | 1.000      |
| 100  | GOBP-APOPTOTIC-SIGNALING-PATHWAY                   | 15   | 0.291399 | 1.199184 | 0.215909  | 0.600855  | 1.000      |
| 101  | GOBP-RESPONSE_TO_NERVE-GROWTH-FACTOR               | 7    | 0.395062 | 1.195291 | 0.246875  | 0.604257  | 1.000      |
| 102  | GOBP-POSITIVE-REGULATION_OF_PROTEIN-TYROSINE.K...  | 5    | 0.445783 | 1.164471 | 0.245714  | 0.669243  | 1.000      |
| 103  | GOBP-MUSCLE-CELL-PROLIFERATION                     | 8    | 0.358376 | 1.159048 | 0.273312  | 0.677999  | 1.000      |
| 104  | GOBP-RESPONSE_TO_OXYGEN-CONTAINING-COMPOUND        | 39   | 0.204577 | 1.151828 | 0.228723  | 0.688505  | 1.000      |
| 105  | GOBP-REGULATION_OF_RECEPTOR-MEDIATED-ENDOCYTOSIS   | 5    | 0.445783 | 1.150438 | 0.277620  | 0.685419  | 1.000      |
| 106  | GOBP-MORPHOGENESIS_OF_AN_EPITHELIUM                | 6    | 0.417905 | 1.145050 | 0.286585  | 0.692153  | 1.000      |
| 107  | GOBP-POSITIVE-REGULATION_OF_NERVOUS-SYSTEM.DEV...  | 12   | 0.294021 | 1.139077 | 0.275735  | 0.700049  | 1.000      |
| 108  | GOBP-APOPTOTIC-PROCESS                             | 35   | 0.207530 | 1.134091 | 0.262136  | 0.706272  | 1.000      |
| 109  | GOBP-REGULATION_OF_PROTEIN-TYROSINE-KINASE-ACT...  | 5    | 0.445783 | 1.132447 | 0.287791  | 0.703785  | 1.000      |
| 110  | GOBP-RECEPTOR-MEDIATED-ENDOCYTOSIS                 | 6    | 0.402439 | 1.130893 | 0.274510  | 0.701172  | 1.000      |
| 111  | GOBP-REGIONALIZATION                               | 6    | 0.390244 | 1.129050 | 0.285276  | 0.699698  | 1.000      |
| 112  | GOBP-ANIMAL-ORGAN-MORPHOGENESIS                    | 12   | 0.283743 | 1.123749 | 0.271429  | 0.706669  | 1.000      |
| 113  | GOBP-REGULATION_OF_CELLULAR-COMPONENT_SIZE         | 7    | 0.367891 | 1.122414 | 0.277419  | 0.704135  | 1.000      |
| 114  | GOBP-GLAND-DEVELOPMENT                             | 7    | 0.372799 | 1.119691 | 0.287926  | 0.705097  | 1.000      |
| 115  | GOBP-RESPONSE_TO_GROWTH-FACTOR                     | 18   | 0.242386 | 1.117483 | 0.288793  | 0.704157  | 1.000      |
| 116  | GOBP-CYTOKINE-PRODUCTION                           | 10   | 0.316989 | 1.115137 | 0.310105  | 0.704038  | 1.000      |
| 117  | GOBP-NEUROTROPHIN-SIGNALING-PATHWAY                | 6    | 0.390244 | 1.110732 | 0.323625  | 0.708926  | 1.000      |
| 118  | GOBP-SPROUTING-ANGIOGENESIS                        | 5    | 0.433735 | 1.110017 | 0.298551  | 0.704725  | 1.000      |
| 119  | GOBP-NEURON-DEATH                                  | 18   | 0.244104 | 1.105382 | 0.292079  | 0.710156  | 1.000      |
| 120  | GOBP-POSITIVE-REGULATION_OF_CELL-DEVELOPMENT       | 12   | 0.294021 | 1.104732 | 0.316406  | 0.706032  | 1.000      |
| 121  | GOBP-POSITIVE-REGULATION_OF_GENE-EXPRESSION        | 16   | 0.253048 | 1.103683 | 0.297297  | 0.702819  | 1.000      |
| 122  | GOBP-REPRODUCTION                                  | 18   | 0.249701 | 1.102133 | 0.311403  | 0.700433  | 1.000      |
| 123  | GOBP-RAS-PROTEIN-SIGNAL-TRANSDUCTION               | 5    | 0.421687 | 1.100958 | 0.320856  | 0.697892  | 1.000      |
| 124  | GOBP-NEUROTROPHIN-TRK-RECEPTOR-SIGNALING-PATHWAY   | 6    | 0.390244 | 1.100617 | 0.372781  | 0.693060  | 1.000      |
| 125  | GOBP-POSITIVE-REGULATION_OF_CELL-DEATH             | 19   | 0.238123 | 1.099045 | 0.275000  | 0.691025  | 1.000      |
| 126  | GOBP-POSITIVE-REGULATION_OF_CATION-TRANSMEMBRAN... | 5    | 0.421687 | 1.094632 | 0.326870  | 0.695733  | 1.000      |

Continuation of Table S2

| NAME | ID                                                | SIZE | ES       | NES      | NOM.p.val | FDR.q.val | FWER.p.val |
|------|---------------------------------------------------|------|----------|----------|-----------|-----------|------------|
| 127  | GOBP-PATTERN-SPECIFICATION-PROCESS                | 6    | 0.390244 | 1.093824 | 0.308176  | 0.692185  | 1.000      |
| 128  | GOBP-POSITIVE-REGULATION-OF-NEUROGENESIS          | 12   | 0.294021 | 1.081507 | 0.371025  | 0.716750  | 1.000      |
| 129  | GOBP-CELL-CELL-JUNCTION-ASSEMBLY                  | 5    | 0.420669 | 1.078416 | 0.364742  | 0.718598  | 1.000      |
| 130  | GOBP-RESPONSE-TO-ORGANIC-CYCLIC-COMPOUND          | 20   | 0.233652 | 1.075103 | 0.328302  | 0.720624  | 1.000      |
| 131  | GOBP-EMBRYO-DEVELOPMENT-ENDING-IN-BIRTH-OR-EGG... | 9    | 0.312711 | 1.073013 | 0.358209  | 0.720005  | 1.000      |
| 132  | GOBP-AMEBOIDAL-TYPE-CELL-MIGRATION                | 11   | 0.292994 | 1.070459 | 0.350000  | 0.720276  | 1.000      |
| 133  | GOBP-POSITIVE-REGULATION-OF-MULTICELLULAR-ORGA... | 32   | 0.206577 | 1.069789 | 0.352381  | 0.716592  | 1.000      |
| 134  | GOBP-IN-UTERO-EMBRYONIC-DEVELOPMENT               | 8    | 0.327652 | 1.067714 | 0.334356  | 0.716376  | 1.000      |
| 135  | GOBP-CELLULAR-RESPONSE-TO-OXYGEN-CONTAINING.CO... | 29   | 0.204257 | 1.061491 | 0.378238  | 0.726085  | 1.000      |
| 136  | GOBP-FAT-CELL-DIFFERENTIATION                     | 9    | 0.312171 | 1.054375 | 0.348387  | 0.737559  | 1.000      |
| 137  | GOBP-EXTRINSIC-APOPTOTIC-SIGNALING-PATHWAY        | 7    | 0.350570 | 1.053130 | 0.346154  | 0.734964  | 1.000      |
| 138  | GOBP-DEFENSE-RESPONSE-TO-OTHER-ORGANISM           | 9    | 0.303833 | 1.046014 | 0.382838  | 0.746608  | 1.000      |
| 139  | GOBP-REGULATION-OF-CIRCADIAN-RHYTHM               | 7    | 0.339959 | 1.044631 | 0.362805  | 0.744492  | 1.000      |
| 140  | GOBP-REGULATION-OF-PROTEOLYSIS                    | 12   | 0.280405 | 1.040987 | 0.380952  | 0.747798  | 1.000      |
| 141  | GOBP-CELLULAR-COMPONENT-DISASSEMBLY               | 6    | 0.373501 | 1.038960 | 0.394659  | 0.746773  | 1.000      |
| 142  | GOBP-RESPONSE-TO-OXYGEN-LEVELS                    | 8    | 0.332405 | 1.034402 | 0.416938  | 0.752905  | 1.000      |
| 143  | GOBP-RECEPTOR-METABOLIC-PROCESS                   | 5    | 0.397590 | 1.030348 | 0.413295  | 0.757994  | 1.000      |
| 144  | GOBP-PEPTIDYL-TYROSINE-MODIFICATION               | 10   | 0.284546 | 1.030200 | 0.369403  | 0.752961  | 1.000      |
| 145  | GOBP-TUBE-MORPHOGENESIS                           | 15   | 0.246575 | 1.028567 | 0.382470  | 0.751475  | 1.000      |
| 146  | GOBP-POSITIVE-REGULATION-OF-LIPASE-ACTIVITY       | 5    | 0.385542 | 1.024295 | 0.432353  | 0.756088  | 1.000      |
| 147  | HALLMARK-KRAS-SIGNALING-UP                        | 6    | 0.366578 | 1.018665 | 0.406940  | 0.763755  | 1.000      |
| 148  | GOBP-CELLULAR-RESPONSE-TO-NITROGEN-COMPOUND       | 20   | 0.211044 | 1.012479 | 0.389830  | 0.772444  | 1.000      |
| 149  | GOBP-RESPONSE-TO-PEPTIDE                          | 18   | 0.228572 | 1.010733 | 0.400844  | 0.771572  | 1.000      |
| 150  | GOBP-NEGATIVE-REGULATION-OF-APOPTOTIC-SIGNALIN... | 7    | 0.324333 | 1.008630 | 0.431677  | 0.771550  | 1.000      |
| 151  | GOBP-EPIDERMIS-DEVELOPMENT                        | 5    | 0.385542 | 1.005432 | 0.415954  | 0.774573  | 1.000      |
| 152  | GOBP-RESPONSE-TO-ABIOTIC-STIMULUS                 | 27   | 0.197061 | 1.004904 | 0.463415  | 0.770655  | 1.000      |
| 153  | GOBP-RESPONSE-TO-CADMIUM-ION                      | 6    | 0.350496 | 1.003856 | 0.427350  | 0.768192  | 1.000      |
| 154  | GOBP-REGULATION-OF-NEURON-DIFFERENTIATION         | 5    | 0.385542 | 0.997101 | 0.419098  | 0.779806  | 1.000      |
| 155  | GOBP-RECEPTOR-INTERNALIZATION                     | 8    | 0.308742 | 0.993783 | 0.432990  | 0.777463  | 1.000      |
| 156  | GOBP-INOSITOL-LIPID-MEDIATED-SIGNALING            | 11   | 0.272727 | 0.992546 | 0.455149  | 0.775832  | 1.000      |
| 157  | GOBP-NEGATIVE-REGULATION-OF-NEURON-DEATH          | 28   | 0.188427 | 0.992432 | 0.476190  | 0.771195  | 1.000      |
| 158  | GOBP-COGNITION                                    | 6    | 0.348650 | 0.991421 | 0.441176  | 0.768658  | 1.000      |
| 159  | GOBP-RESPONSE-TO-ACID-CHEMICAL                    | 7    | 0.323984 | 0.985761 | 0.435435  | 0.776903  | 1.000      |
| 160  | GOBP-MAINTENANCE-OF-LOCATION                      | 9    | 0.282733 | 0.976512 | 0.447099  | 0.792714  | 1.000      |
| 161  | GOBP-REGULATION-OF-PEPTIDYL-TYROSINE-PHOSPHORY... | 6    | 0.346976 | 0.974344 | 0.431818  | 0.792977  | 1.000      |
| 162  | HALLMARK-APOPTOSIS                                | 5    | 0.385542 | 0.973536 | 0.445748  | 0.790025  | 1.000      |
| 163  | GOBP-REGULATION-OF-PHOSPHOLIPASE-C-ACTIVITY       | 7    | 0.322147 | 0.970832 | 0.492537  | 0.791073  | 1.000      |
| 164  | GOBP-CELLULAR-RESPONSE-TO-ABIOTIC-STIMULUS        | 6    | 0.343646 | 0.966993 | 0.444785  | 0.794966  | 1.000      |
| 165  | GOBP-SMOOTH-MUSCLE-CELL-PROLIFERATION             | 14   | 0.243243 | 0.965973 | 0.471483  | 0.792525  | 1.000      |
| 166  | GOBP-BLOOD-VESSEL-MORPHOGENESIS                   | 10   | 0.269231 | 0.946946 | 0.483180  | 0.831579  | 1.000      |
| 167  | GOBP-REGULATION-OF-APOPTOTIC-SIGNALING-PATHWAY    | 5    | 0.367759 | 0.944831 | 0.493113  | 0.831490  | 1.000      |
| 168  | GOBP-REGULATION-OF-VASCULAR-ASSOCIATED-SMOOTH...  | 21   | 0.202991 | 0.944108 | 0.551724  | 0.827934  | 1.000      |
| 169  | GOBP-POSITIVE-REGULATION-OF-CELL-POPULATION.PR... |      |          |          |           |           |            |

Continuation of Table S2

| NAME | ID                                                | SIZE | ES       | NES      | NOM.p.val | FDR.q.val | FWER.p.val |
|------|---------------------------------------------------|------|----------|----------|-----------|-----------|------------|
| 170  | GOBP-NEGATIVE-REGULATION-OF-PROTEIN-METABOLIC...  | 20   | 0.206828 | 0.943682 | 0.556098  | 0.824334  | 1.000      |
| 171  | GOBP-REGULATION-OF-CELL-DEVELOPMENT               | 15   | 0.229179 | 0.942961 | 0.526531  | 0.821382  | 1.000      |
| 172  | GOBP-T-CELL-ACTIVATION                            | 8    | 0.296043 | 0.942421 | 0.550769  | 0.817904  | 1.000      |
| 173  | GOBP-POSITIVE-REGULATION-OF-CELL-PROJECTION-OR... | 10   | 0.263454 | 0.939127 | 0.545752  | 0.820297  | 1.000      |
| 174  | GOBP-RESPONSE-TO-NITROGEN-COMPOUND                | 35   | 0.173399 | 0.938346 | 0.541667  | 0.817325  | 1.000      |
| 175  | GOBP-POSITIVE-REGULATION-OF-ORGANELLE-ORGANIZA... | 10   | 0.264193 | 0.938133 | 0.511475  | 0.813289  | 1.000      |
| 176  | GOBP-RESPONSE-TO-MOLECULE-OF-BACTERIAL-ORIGIN     | 13   | 0.237073 | 0.938083 | 0.542636  | 0.808791  | 1.000      |
| 177  | REACTOME-SIGNALING-BY-NTRKS                       | 18   | 0.206398 | 0.937190 | 0.566406  | 0.806319  | 1.000      |
| 178  | GOBP-GLIOGENESIS                                  | 12   | 0.244691 | 0.937020 | 0.515464  | 0.802196  | 1.000      |
| 179  | GOBP-RESPONSE-TO-BACTERIUM                        | 13   | 0.237073 | 0.928220 | 0.564000  | 0.817219  | 1.000      |
| 180  | GOBP-CELLULAR-RESPONSE-TO-REACTIVE-OXYGEN-SPECIES | 7    | 0.312426 | 0.926720 | 0.544025  | 0.816003  | 1.000      |
| 181  | GOBP-REGULATION-OF-PROTEIN-CATABOLIC-PROCESS      | 7    | 0.310043 | 0.925115 | 0.538206  | 0.815394  | 1.000      |
| 182  | GOBP-CELLULAR-RESPONSE-TO-BIOTIC-STIMULUS         | 8    | 0.282123 | 0.921191 | 0.560897  | 0.819238  | 1.000      |
| 183  | GOBP-POSITIVE-REGULATION-OF-CELLULAR-COMPONENT... | 9    | 0.275348 | 0.909557 | 0.576369  | 0.840716  | 1.000      |
| 184  | GOBP-CELLULAR-RESPONSE-TO-INORGANIC-SUBSTANCE     | 11   | 0.246107 | 0.905116 | 0.578740  | 0.846360  | 1.000      |
| 185  | GOBP-CELLULAR-RESPONSE-TO-MOLECULE-OF-BACTERIA... | 8    | 0.282123 | 0.904349 | 0.574324  | 0.843317  | 1.000      |
| 186  | GOBP-CARBOHYDRATE-METABOLIC-PROCESS               | 9    | 0.265823 | 0.902198 | 0.561644  | 0.843851  | 1.000      |
| 187  | GOBP-REGULATION-OF-EXTRINSIC-APOPTOTIC-SIGNALI... | 6    | 0.329268 | 0.900480 | 0.534535  | 0.843186  | 1.000      |
| 188  | GOBP-POSITIVE-REGULATION-OF-BINDING               | 6    | 0.314323 | 0.899743 | 0.593567  | 0.840011  | 1.000      |
| 189  | GOBP-CELLULAR-RESPONSE-TO-CHEMICAL-STRESS         | 7    | 0.312426 | 0.899205 | 0.586103  | 0.836582  | 1.000      |
| 190  | GOBP-REGULATION-OF-SMALL-MOLECULE-METABOLIC-PR... | 9    | 0.265823 | 0.897791 | 0.590476  | 0.835583  | 1.000      |
| 191  | GOBP-CELLULAR-RESPONSE-TO-PEPTIDE                 | 13   | 0.226667 | 0.894479 | 0.581227  | 0.838232  | 1.000      |
| 192  | GOBP-REGULATION-OF-NERVOUS-SYSTEM-DEVELOPMENT     | 15   | 0.215999 | 0.893635 | 0.624535  | 0.835723  | 1.000      |
| 193  | GOBP-POSITIVE-REGULATION-OF-RESPONSE-TO-EXTERN... | 9    | 0.265249 | 0.886115 | 0.610000  | 0.846711  | 1.000      |
| 194  | GOBP-POSITIVE-REGULATION-OF-NEURON-DEATH          | 5    | 0.350374 | 0.871433 | 0.598214  | 0.851963  | 1.000      |
| 195  | GOBP-REGULATION-OF-EPITHELIAL-CELL-MIGRATION      | 6    | 0.301974 | 0.871433 | 0.603279  | 0.869243  | 1.000      |
| 196  | GOBP-NEGATIVE-REGULATION-OF-BIOSYNTHETIC-PROCESS  | 13   | 0.218566 | 0.867179 | 0.616438  | 0.873859  | 1.000      |
| 197  | GOBP-RESPONSE-TO-LIGHT-STIMULUS                   | 11   | 0.235352 | 0.861565 | 0.617857  | 0.880746  | 1.000      |
| 198  | REACTOME-ESR-MEDIATED-SIGNALING                   | 8    | 0.268343 | 0.860883 | 0.637255  | 0.877862  | 1.000      |
| 199  | GOBP-NEGATIVE-REGULATION-OF-NUCLEOBASE-CONTAIN... | 13   | 0.218307 | 0.860778 | 0.617761  | 0.873783  | 1.000      |
| 200  | GOBP-ANATOMICAL-STRUCTURE-FORMATION-INVOLVED-I... | 20   | 0.188820 | 0.859008 | 0.671296  | 0.872804  | 1.000      |
| 201  | REACTOME-DEVELOPMENTAL-BIOLOGY                    | 22   | 0.179148 | 0.858213 | 0.665158  | 0.869801  | 1.000      |
| 202  | GOBP-NEGATIVE-REGULATION-OF-MOLECULAR-FUNCTION    | 24   | 0.174591 | 0.854855 | 0.663507  | 0.872167  | 1.000      |
| 203  | REACTOME-EXTRA-NUCLEAR-ESTROGEN-SIGNALING         | 7    | 0.280583 | 0.851443 | 0.675241  | 0.875037  | 1.000      |
| 204  | REACTOME-SIGNALING-BY-NUCLEAR-RECEPTORS           | 8    | 0.268343 | 0.846029 | 0.652997  | 0.881479  | 1.000      |
| 205  | GOBP-REGULATION-OF-DEVELOPMENTAL-GROWTH           | 9    | 0.247509 | 0.845564 | 0.652459  | 0.878132  | 1.000      |
| 206  | GOBP-RESPONSE-TO-LIPID                            | 19   | 0.186565 | 0.844920 | 0.681034  | 0.875227  | 1.000      |
| 207  | GOBP-REGULATION-OF-CELLULAR-COMPONENT-BIOGENESIS  | 10   | 0.230795 | 0.835975 | 0.686709  | 0.888405  | 1.000      |
| 208  | GOBP-PROTEIN-LOCALIZATION-TO-PLASMA-MEMBRANE      | 7    | 0.271605 | 0.834631 | 0.681115  | 0.886700  | 1.000      |
| 209  | GOBP-NEGATIVE-REGULATION-OF-CATALYTIC-ACTIVITY    | 17   | 0.197492 | 0.837066 | 0.691450  | 0.884383  | 1.000      |
| 210  | GOBP-REGULATION-OF-NEUROGENESIS                   | 14   | 0.204986 | 0.832092 | 0.681992  | 0.883483  | 1.000      |
| 211  | GOBP-LEARNING                                     | 13   | 0.214610 | 0.831109 | 0.684397  | 0.881126  | 1.000      |
| 212  | REACTOME-NUCLEAR-EVENTS-KINASE-AND-TRANSCRIPTI... | 11   | 0.227933 | 0.829574 | 0.682848  | 0.880018  | 1.000      |

Continuation of Table S2

|     | NAME                                              | ID            | SIZE | ES       | NES      | NOM.p.val | FDR.q.val | FWER.p.val |
|-----|---------------------------------------------------|---------------|------|----------|----------|-----------|-----------|------------|
| 213 | GOBP-PHAGOCYTOSIS                                 | GO-0006909    | 5    | 0.313984 | 0.823634 | 0.652661  | 0.887231  | 1.000      |
| 214 | GOBP-GENERATION_OF_PRECURSOR_METABOLITES_AND_E... | GO-0006091    | 5    | 0.325301 | 0.819119 | 0.666667  | 0.891227  | 1.000      |
| 215 | GOBP-APOPTOTIC-MITOCHONDRIAL-CHANGES              | GO-0008637    | 6    | 0.280488 | 0.812946 | 0.700288  | 0.898686  | 1.000      |
| 216 | GOBP-POSITIVE-REGULATION_OF_CELL-GROWTH           | GO-0030307    | 6    | 0.289468 | 0.812719 | 0.730104  | 0.894956  | 1.000      |
| 217 | GOBP-MITOCHONDRION-ORGANIZATION                   | GO-0007005    | 7    | 0.271605 | 0.809367 | 0.739938  | 0.897279  | 1.000      |
| 218 | GOBP-POSITIVE-REGULATION_OF_CELLULAR-COMPONENT... | GO-0051130    | 24   | 0.161920 | 0.804547 | 0.719298  | 0.901754  | 1.000      |
| 219 | GOBP-RESPONSE_TO-RADIATION                        | GO-0009314    | 13   | 0.202164 | 0.801178 | 0.753906  | 0.903580  | 1.000      |
| 220 | GOBP-PROTEIN-MODIFICATION_BY_SMALL-PROTEIN_CON... | GO-0070647    | 7    | 0.259259 | 0.798782 | 0.723684  | 0.903603  | 1.000      |
| 221 | GOBP-MEMORY                                       | GO-0007613    | 13   | 0.197345 | 0.789150 | 0.739688  | 0.916462  | 1.000      |
| 222 | GOBP-REGULATION_OF_DNA-BINDING_TRANSCRIPTION_F... | GO-0051090    | 16   | 0.182921 | 0.784759 | 0.778571  | 0.920099  | 1.000      |
| 223 | GOBP-RESPONSE_TO-INTERLEUKIN_1                    | GO-0007055    | 5    | 0.313845 | 0.783294 | 0.744382  | 0.918634  | 1.000      |
| 224 | GOBP-ORGANIC-ACID-METABOLIC-PROCESS               | GO-0006082    | 7    | 0.259259 | 0.775646 | 0.747475  | 0.927767  | 1.000      |
| 225 | GOBP-TISSUE-MIGRATION                             | GO-0090130    | 9    | 0.227848 | 0.774783 | 0.778912  | 0.925098  | 1.000      |
| 226 | GOBP-CARBOHYDRATE-DERIVATIVE-METABOLIC-PROCESS    | GO-1901135    | 8    | 0.238102 | 0.772809 | 0.753086  | 0.924056  | 1.000      |
| 227 | GOBP-NEUROINFLAMMATORY_RESPONSE                   | GO-0150076    | 5    | 0.295576 | 0.766714 | 0.748447  | 0.930125  | 1.000      |
| 228 | GOBP-TEMPERATURE-HOMEOSTASIS                      | GO-0001659    | 5    | 0.293284 | 0.765820 | 0.736842  | 0.927558  | 1.000      |
| 229 | GOBP-NEGATIVE-REGULATION_OF_CATABOLIC-PROCESS     | GO-0009895    | 8    | 0.234119 | 0.764973 | 0.786885  | 0.924896  | 1.000      |
| 230 | GOBP-REGULATION_OF_LIPID-METABOLIC-PROCESS        | GO-0019216    | 7    | 0.259259 | 0.763299 | 0.758278  | 0.923715  | 1.000      |
| 231 | GOBP-PROTEIN_KINASE_B-SIGNALING                   | GO-0043491    | 6    | 0.264584 | 0.756993 | 0.776025  | 0.929676  | 1.000      |
| 232 | GOBP-RESPONSE_TO-HORMONE                          | GO-0009725    | 20   | 0.166165 | 0.753226 | 0.813853  | 0.931376  | 1.000      |
| 233 | GOBP-REGULATION_OF_IMMUNE-SYSTEM-PROCESS          | GO-0002682    | 21   | 0.155676 | 0.744707 | 0.831818  | 0.941272  | 1.000      |
| 234 | GOBP-PROTEIN_CATABOLIC-PROCESS                    | GO-0030163    | 8    | 0.224278 | 0.737895 | 0.778846  | 0.947455  | 1.000      |
| 235 | GOBP-MONOCARBOXYLIC-ACID-METABOLIC-PROCESS        | GO-0032787    | 6    | 0.256098 | 0.737115 | 0.817365  | 0.944680  | 1.000      |
| 236 | GOBP-MONOSACCHARIDE-METABOLIC-PROCESS             | GO-0005996    | 6    | 0.256098 | 0.734007 | 0.782991  | 0.945105  | 1.000      |
| 237 | GOBP-POSITIVE-REGULATION_OF_PHOSPHATIDYLINOSIT... | GO-0014068    | 5    | 0.286111 | 0.732071 | 0.790055  | 0.944128  | 1.000      |
| 238 | GOBP-TELENCEPHALON-DEVELOPMENT                    | GO-0021537    | 7    | 0.234568 | 0.726567 | 0.815534  | 0.947992  | 1.000      |
| 239 | GOBP-BLOOD_VESSEL-ENDOTHELIAL-CELL-MIGRATION      | GO-0043534    | 8    | 0.225000 | 0.724806 | 0.858621  | 0.946391  | 1.000      |
| 240 | GOBP-CELL_JUNCTION_ASSEMBLY                       | GO-0034329    | 8    | 0.225818 | 0.720379 | 0.845455  | 0.948791  | 1.000      |
| 241 | GOBP-ENDOTHELIAL-CELL-MIGRATION                   | GO-0043542    | 8    | 0.225000 | 0.718164 | 0.869186  | 0.947988  | 1.000      |
| 242 | GOBP-RESPONSE_TO-BIOTIC-STIMULUS                  | GO-0009607    | 17   | 0.157862 | 0.717363 | 0.871698  | 0.945447  | 1.000      |
| 243 | GOBP-REGULATION_OF_LIPID-BIOSYNTHETIC-PROCESS     | GO-0046890    | 6    | 0.256098 | 0.716666 | 0.811966  | 0.942465  | 1.000      |
| 244 | GOBP-TRANSMEMBRANE-RECEPTOR_PROTEIN_SERINE_THR... | GO-0007178    | 6    | 0.256098 | 0.716244 | 0.775000  | 0.939345  | 1.000      |
| 245 | GOBP-GLUCOSE-METABOLIC-PROCESS                    | GO-0006006    | 6    | 0.256098 | 0.712291 | 0.833828  | 0.941003  | 1.000      |
| 246 | GOBP-ACTIVATION_OF_PROTEIN_KINASE_ACTIVITY        | GO-0032147    | 10   | 0.196757 | 0.711940 | 0.884615  | 0.937639  | 1.000      |
| 247 | GOBP-TUBE-DEVELOPMENT                             | GO-0035295    | 18   | 0.157401 | 0.708326 | 0.889344  | 0.939202  | 1.000      |
| 248 | GOBP-DEVELOPMENTAL-CELL-GROWTH                    | GO-0048588    | 5    | 0.273833 | 0.701043 | 0.812680  | 0.944836  | 1.000      |
| 249 | GOBP-NEGATIVE-REGULATION_OF_PROTEIN_CATABOLIC---- | GO-0042177    | 5    | 0.264669 | 0.696241 | 0.865270  | 0.946683  | 1.000      |
| 250 | GOBP-MONAMINE-TRANSPORT                           | GO-0015844    | 5    | 0.264669 | 0.694773 | 0.862259  | 0.944704  | 1.000      |
| 251 | GOBP-NEGATIVE-REGULATION_OF_TRANSMEMBRANE_TRAN... | GO-0034763    | 6    | 0.246064 | 0.694754 | 0.862928  | 0.940960  | 1.000      |
| 252 | GOBP-AXON-DEVELOPMENT                             | GO-0061564    | 18   | 0.153389 | 0.693965 | 0.920930  | 0.938242  | 1.000      |
| 253 | GOBP-LIPID-BIOSYNTHETIC-PROCESS                   | GO-0008610    | 6    | 0.256098 | 0.677422 | 0.853211  | 0.955373  | 1.000      |
| 254 | REACTOME-ESTROGEN-DEPENDENT_NUCLEAR-EVENTS-DOW... | R-RNO-9634638 | 5    | 0.256066 | 0.673036 | 0.857143  | 0.956675  | 1.000      |
| 255 | GOBP-INTRACELLULAR-RECEPTOR-SIGNALING-PATHWAY     | GO-0030522    | 5    | 0.253012 | 0.669349 | 0.870523  | 0.956832  | 1.000      |

Continuation of Table S2

| NAME | ID                                                | SIZE          | ES | NES       | NOM.p.val | FDR.q.val | FWER.p.val |
|------|---------------------------------------------------|---------------|----|-----------|-----------|-----------|------------|
| 256  | GOBP-PEPTIDYL-SERINE-MODIFICATION                 | GO-0018209    | 12 | 0.172444  | 0.653322  | 0.940000  | 0.970175   |
| 257  | GOBP-POSITIVE-REGULATION-OF-SMALL-MOLECULE-MET... | GO-0062013    | 5  | 0.253012  | 0.633607  | 0.904110  | 0.985770   |
| 258  | GOBP-REGULATION-OF-BINDING                        | GO-0051098    | 11 | 0.167505  | 0.628958  | 0.936396  | 0.986075   |
| 259  | GOBP-REGULATION-OF-CELL-CELL-ADHESION             | GO-0022407    | 9  | 0.185989  | 0.620166  | 0.958599  | 0.989946   |
| 260  | GOBP-CELL-CELL-ADHESION                           | GO-0098609    | 14 | 0.150142  | 0.612462  | 0.962963  | 0.991996   |
| 261  | GOBP-ASSOCIATIVE-LEARNING                         | GO-0008306    | 7  | 0.200243  | 0.603305  | 0.948640  | 0.994696   |
| 262  | GOBP-MUSCLE-STRUCTURE-DEVELOPMENT                 | GO-0061061    | 16 | 0.138889  | 0.602117  | 0.953488  | 0.991787   |
| 263  | GOBP-EMBRYONIC-MORPHOGENESIS                      | GO-0048598    | 6  | 0.215922  | 0.598940  | 0.933526  | 0.990320   |
| 264  | GOBP-REGULATION-OF-ANION-TRANSMEMBRANE-TRANSPORT  | GO-1903959    | 5  | 0.229882  | 0.586988  | 0.945860  | 0.995026   |
| 265  | HALLMARK-P13K-AKT-MTOR-SIGNALING                  | M5923         | 6  | 0.206315  | 0.586469  | 0.960000  | 0.991653   |
| 266  | GOBP-PHOSPHATIDYLINOSITOL-3-KINASE-SIGNALING      | GO-0014065    | 7  | 0.184026  | 0.575130  | 0.969789  | 0.994187   |
| 267  | GOBP-SMALL-GTPASE-MEDIATED-SIGNAL-TRANSDUCTION    | GO-0007264    | 8  | 0.175000  | 0.562528  | 0.969492  | 0.993294   |
| 268  | GOBP-REGULATION-OF-PHOSPHATIDYLINOSITOL-3-KINA... | GO-0014066    | 6  | 0.196888  | 0.561923  | 0.968116  | 0.993294   |
| 269  | GOBP-REGULATION-OF-PHOSPHOLIPASE-ACTIVITY         | GO-0010517    | 6  | 0.182927  | 0.523021  | 0.997167  | 1.000000   |
| 270  | GOBP-REGULATION-OF-LIPASE-ACTIVITY                | GO-0060191    | 6  | 0.182927  | 0.513614  | 0.989933  | 1.000000   |
| 271  | GOBP-POSITIVE-REGULATION-OF-IMMUNE-SYSTEM-PROCESS | GO-0002684    | 18 | 0.116068  | 0.507689  | 0.996212  | 0.999431   |
| 272  | GOBP-REGULATION-OF-ANATOMICAL-STRUCTURE-SIZE      | GO-0090066    | 10 | 0.142915  | 0.500134  | 0.977860  | 0.997011   |
| 273  | GOBP-REGULATION-OF-PROTEIN-BINDING                | GO-0043393    | 7  | 0.137979  | 0.422481  | 1.000000  | 0.999375   |
| 274  | GOBP-REGULATION-OF-ANATOMICAL-STRUCTURE-MORPHO... | GO-0022603    | 17 | -0.105904 | -0.367504 | 0.998652  | 0.999539   |
| 275  | GOBP-AGING                                        | GO-0007568    | 13 | -0.118336 | -0.377863 | 0.998698  | 1.000000   |
| 276  | GOBP-ENZYME-LINKED-RECEPTOR-PROTEIN-SIGNALING...  | GO-0007167    | 24 | -0.116853 | -0.434821 | 0.997409  | 1.000000   |
| 277  | GOBP-VASCULATURE-DEVELOPMENT                      | GO-0001944    | 17 | -0.126150 | -0.436741 | 1.000000  | 1.000000   |
| 278  | GOBP-CIRCULATORY-SYSTEM-DEVELOPMENT               | GO-0072359    | 21 | -0.117975 | -0.437028 | 0.996139  | 1.000000   |
| 279  | GOBP-POSITIVE-REGULATION-OF-DNA-BINDING-TRANSC... | GO-0051091    | 10 | -0.154353 | -0.450621 | 0.995575  | 1.000000   |
| 280  | GOBP-POSITIVE-REGULATION-OF-GLIOGENESIS           | GO-0014015    | 5  | -0.196521 | -0.455318 | 0.993893  | 1.000000   |
| 281  | GOBP-REGULATION-OF-GLIOGENESIS                    | GO-0014013    | 5  | -0.196521 | -0.459066 | 0.994169  | 1.000000   |
| 282  | GOBP-NEURON-MIGRATION                             | GO-0001764    | 5  | -0.202327 | -0.469725 | 0.998440  | 1.000000   |
| 283  | GOBP-REGULATION-OF-NEURON-PROJECTION-DEVELOPMENT  | GO-0010975    | 16 | -0.146887 | -0.489104 | 0.986486  | 1.000000   |
| 284  | REACTOME-CELLULAR-RESPONSES-TO-EXTERNAL-STIMULI   | R-RNO-8953897 | 11 | -0.165255 | -0.499314 | 0.983027  | 1.000000   |
| 285  | GOBP-CELL-JUNCTION-ORGANIZATION                   | GO-0034330    | 19 | -0.144928 | -0.504704 | 0.977690  | 1.000000   |
| 286  | GOBP-POSITIVE-REGULATION-OF-PROTEIN-PHOSPHORYL... | GO-0001934    | 22 | -0.136159 | -0.505624 | 0.979513  | 1.000000   |
| 287  | GOBP-REGULATION-OF-IMMUNE-RESPONSE                | GO-0050776    | 12 | -0.164030 | -0.506634 | 0.977654  | 1.000000   |
| 288  | GOBP-SYNAPSE-ORGANIZATION                         | GO-0050808    | 17 | -0.146905 | -0.508554 | 0.979973  | 1.000000   |
| 289  | GOBP-POSITIVE-REGULATION-OF-PROTEIN-MODIFICATI... | GO-0031401    | 22 | -0.136159 | -0.508561 | 0.983051  | 1.000000   |
| 290  | GOBP-LONG-TERM-SYNAPTIC-DEPRESSION                | GO-0060292    | 5  | -0.217440 | -0.509775 | 0.989264  | 1.000000   |
| 291  | GOBP-REGULATION-OF-ENDOCYTOSIS                    | GO-0030100    | 6  | -0.205081 | -0.510696 | 0.973602  | 1.000000   |
| 292  | GOBP-REGULATION-OF-PROTEIN-LOCALIZATION-TO-MEM... | GO-1905475    | 7  | -0.204596 | -0.519918 | 0.984849  | 1.000000   |
| 293  | GOBP-EPITHELIAL-CELL-PROLIFERATION                | GO-0050673    | 12 | -0.173928 | -0.533413 | 0.968320  | 1.000000   |
| 294  | GOBP-IMPORT-INTO-CELL                             | GO-0098657    | 6  | -0.216523 | -0.536393 | 0.964602  | 1.000000   |
| 295  | GOBP-REGULATION-OF-PROTEIN-PHOSPHORYLATION        | GO-0001932    | 25 | -0.143490 | -0.545921 | 0.955186  | 1.000000   |
| 296  | GOBP-REGULATION-OF-PROTEIN-STABILITY              | GO-0031647    | 5  | -0.236877 | -0.549042 | 0.976958  | 1.000000   |
| 297  | GOBP-POSITIVE-REGULATION-OF-MAP-KINASE-ACTIVITY   | GO-0043406    | 6  | -0.222406 | -0.549139 | 0.963415  | 1.000000   |
| 298  | REACTOME_POST_TRANSLATIONAL_PROTEIN_MODIFICATION  | R-RNO-597592  | 7  | -0.208639 | -0.550696 | 0.952239  | 1.000000   |

Continuation of Table S2

| NAME | ID                                                | SIZE | ES        | NES       | NOM.p.val | FDR.q.val | FWER.p.val |
|------|---------------------------------------------------|------|-----------|-----------|-----------|-----------|------------|
| 299  | GOBP-ACTIVATION_OF_MAPK_ACTIVITY                  | 6    | -0.222406 | -0.551998 | 0.967742  | 1.000000  | 1.000      |
| 300  | GOBP-PURINE-CONTAINING-COMPOUND-METABOLIC-PROCESS | 6    | -0.223342 | -0.553979 | 0.958209  | 1.000000  | 1.000      |
| 301  | GOBP-RESPONSE-TO-NICOTINE                         | 7    | -0.210901 | -0.556822 | 0.959538  | 1.000000  | 1.000      |
| 302  | GOBP-ANION-TRANSMEMBRANE-TRANSPORT                | 7    | -0.215154 | -0.557472 | 0.947368  | 1.000000  | 1.000      |
| 303  | GOBP-RESPONSE-TO-TEMPERATURE-STIMULUS             | 9    | -0.197220 | -0.567293 | 0.959479  | 1.000000  | 1.000      |
| 304  | GOBP-DNA-METABOLIC-PROCESS                        | 6    | -0.234427 | -0.580471 | 0.952527  | 1.000000  | 1.000      |
| 305  | GOBP-POSITIVE-REGULATION_OF_PHOSPHORUS-METABOL... | 23   | -0.155306 | -0.586168 | 0.953488  | 1.000000  | 1.000      |
| 306  | GOBP-MUSCLE-TISSUE-DEVELOPMENT                    | 11   | -0.193900 | -0.587470 | 0.942544  | 1.000000  | 1.000      |
| 307  | GOBP-CELLULAR-COMPOONENT-MORPHOGENESIS            | 25   | -0.157655 | -0.590751 | 0.920615  | 1.000000  | 1.000      |
| 308  | GOBP-POSITIVE-REGULATION_OF_PROTEIN_KINASE-ACT... | 18   | -0.170318 | -0.592071 | 0.944675  | 1.000000  | 1.000      |
| 309  | GOBP-POSITIVE-REGULATION_OF_IMMUNE-RESPONSE       | 9    | -0.207695 | -0.593196 | 0.947826  | 1.000000  | 1.000      |
| 310  | GOBP-SKELETAL-MUSCLE-ORGAN-DEVELOPMENT            | 5    | -0.256647 | -0.593414 | 0.955590  | 1.000000  | 1.000      |
| 311  | GOBP-POSITIVE-REGULATION_OF_NEURON-PROJECTION...  | 5    | -0.205447 | -0.596298 | 0.935664  | 1.000000  | 1.000      |
| 312  | GOBP-FOREBRAIN-DEVELOPMENT                        | 10   | -0.203447 | -0.596298 | 0.935664  | 1.000000  | 1.000      |
| 313  | GOBP-CELL-PART-MORPHOGENESIS                      | 25   | -0.157655 | -0.596462 | 0.923761  | 1.000000  | 1.000      |
| 314  | GOBP-NEGATIVE-REGULATION_OF_LIPID-METABOLIC-PR... | 5    | -0.260425 | -0.602233 | 0.933628  | 1.000000  | 1.000      |
| 315  | GOBP-TRANSMEMBRANE-RECEPTOR-PROTEIN-TYROSINE_K... | 19   | -0.173498 | -0.604406 | 0.920000  | 1.000000  | 1.000      |
| 316  | GOBP-LYMPHOCTEACTIVATION                          | 10   | -0.202958 | -0.605912 | 0.924177  | 1.000000  | 1.000      |
| 317  | GOBP-REGULATION_OF-CELLULAR-AMIDE-METABOLIC-PR... | 9    | -0.213704 | -0.606204 | 0.935574  | 1.000000  | 1.000      |
| 318  | GOBP-REGULATION_OF_PHOSPHORUS-METABOLIC-PROCESS   | 26   | -0.162771 | -0.608043 | 0.920984  | 1.000000  | 1.000      |
| 319  | REACTOME-SIGNALING-BY_NTRK2-TRKB                  | 6    | -0.246116 | -0.608051 | 0.908815  | 1.000000  | 1.000      |
| 320  | GOBP-CELL-MORPHOGENESIS                           | 25   | -0.157655 | -0.608692 | 0.935317  | 1.000000  | 1.000      |
| 321  | GOBP-POSITIVE-REGULATION_OF-CELL-ADHESION         | 7    | -0.231565 | -0.610231 | 0.923195  | 1.000000  | 1.000      |
| 322  | GOBP-POSITIVE-REGULATION_OF_MAPK-CASCADE          | 9    | -0.216395 | -0.610797 | 0.926934  | 1.000000  | 1.000      |
| 323  | GOBP-NEGATIVE-REGULATION_OF-CELL-DEVELOPMENT      | 6    | -0.247819 | -0.614045 | 0.925595  | 1.000000  | 1.000      |
| 324  | GOBP-ORGANONITROGEN-COMPOUND-CATABOLIC-PROCESS    | 10   | -0.210649 | -0.619006 | 0.940278  | 1.000000  | 1.000      |
| 325  | GOBP-REGULATION_OF-HORMONE-LEVELS                 | 12   | -0.200696 | -0.621727 | 0.916103  | 1.000000  | 1.000      |
| 326  | GOBP-RESPONSE-TO-CALCIUM-ION                      | 6    | -0.255934 | -0.623693 | 0.911337  | 1.000000  | 1.000      |
| 327  | GOBP-REGULATION_OF-PROTEIN-MODIFICATION-PROCESS   | 28   | -0.162277 | -0.623810 | 0.917092  | 1.000000  | 1.000      |
| 328  | GOBP-POSITIVE-REGULATION_OF-ION-TRANSPORT         | 17   | -0.180748 | -0.623969 | 0.898667  | 1.000000  | 1.000      |
| 329  | GOBP-REGULATION_OF-PROTEIN-KINASE-ACTIVITY        | 21   | -0.174151 | -0.625182 | 0.909574  | 1.000000  | 1.000      |
| 330  | GOBP-POSITIVE-REGULATION_OF-TRANSPORT             | 26   | -0.160936 | -0.626176 | 0.919643  | 1.000000  | 1.000      |
| 331  | GOBP-PEPTIDYL-AMINO-ACID-MODIFICATION             | 22   | -0.168541 | -0.627797 | 0.884566  | 1.000000  | 1.000      |
| 332  | REACTOME-SIGNALING-BY-RECEPTOR-TYROSINE-KINASES   | 26   | -0.164835 | -0.635886 | 0.890703  | 1.000000  | 1.000      |
| 333  | GOBP-POSITIVE-REGULATION_OF-PROTEIN-METABOLIC...  | 27   | -0.164636 | -0.636082 | 0.893484  | 1.000000  | 1.000      |
| 334  | GOBP-EPHRIN-RECEPTOR-SIGNALING-PATHWAY            | 5    | -0.267085 | -0.637361 | 0.913767  | 1.000000  | 1.000      |
| 335  | GOBP-REGULATION_OF-TRANSFERASE-ACTIVITY           | 21   | -0.174151 | -0.638531 | 0.897503  | 1.000000  | 1.000      |
| 336  | GOBP-REGULATION_OF-CELL-ACTIVATION                | 8    | -0.239731 | -0.643675 | 0.890351  | 1.000000  | 1.000      |
| 337  | GOBP-CARDIAC-MUSCLE-TISSUE-DEVELOPMENT            | 6    | -0.257535 | -0.644616 | 0.879822  | 1.000000  | 1.000      |
| 338  | GOBP-MULTICELLULAR-ORGANISMAL-RESPONSE-TO-STRESS  | 5    | -0.279031 | -0.647185 | 0.888719  | 1.000000  | 1.000      |
| 339  | GOBP-RESPONSE-TO-INSULIN                          | 5    | -0.280960 | -0.647424 | 0.892097  | 1.000000  | 1.000      |
| 340  | GOBP-AMYLOID-PRECURSOR-PROTEIN-CATABOLIC-PROCESS  | 5    | -0.277078 | -0.650088 | 0.894172  | 1.000000  | 1.000      |
| 341  | GOBP-HEART-DEVELOPMENT                            | 6    | -0.257535 | -0.651779 | 0.885587  | 1.000000  | 1.000      |

Continuation of Table S2

| NAME | ID                                                 | SIZE          | ES | NES       | NOM.p.val | FDR.q.val | FWER.p.val |
|------|----------------------------------------------------|---------------|----|-----------|-----------|-----------|------------|
| 342  | GOBP-AMYLOID-BETA-METABOLIC-PROCESS                | GO-0050435    | 5  | -0.277078 | -0.651960 | 0.887879  | 1.000000   |
| 343  | GOBP-AMYLOID-PRECURSOR-PROTEIN-METABOLIC-PROCESS   | GO-0042982    | 5  | -0.277078 | -0.654382 | 0.875188  | 1.000000   |
| 344  | GOBP-PEPTIDYL-LYSINE-MODIFICATION                  | GO-0018205    | 5  | -0.279765 | -0.652523 | 0.891850  | 1.000000   |
| 345  | GOBP-PROTEIN-LOCALIZATION-TO-MEMBRANE              | GO-0072687    | 13 | -0.204681 | -0.655336 | 0.882845  | 1.000000   |
| 346  | GOBP-CELLULAR-LIPID-METABOLIC-PROCESS              | GO-0044255    | 7  | -0.249394 | -0.655593 | 0.880775  | 1.000000   |
| 347  | GOBP-ENDOTHELIAL-CELL-PROLIFERATION                | GO-0001935    | 8  | -0.233929 | -0.655861 | 0.873381  | 1.000000   |
| 348  | GOBP-LIPID-METABOLIC-PROCESS                       | GO-0006629    | 10 | -0.223034 | -0.657325 | 0.886657  | 1.000000   |
| 349  | GOBP-TISSUE-HOMEOSTASIS                            | GO-0001894    | 5  | -0.280632 | -0.659432 | 0.883686  | 1.000000   |
| 350  | GOBP-REGULATION-OF-MUSCLE-CELL-DIFFERENTIATION     | GO-0051147    | 6  | -0.264711 | -0.665116 | 0.880060  | 1.000000   |
| 351  | GOBP-CELL-ACTIVATION                               | GO-0001775    | 22 | -0.184767 | -0.671771 | 0.864474  | 1.000000   |
| 352  | GOBP-CELLULAR-RESPONSE-TO-ORGANIC-CYCLIC-COMPOUND  | GO-0071407    | 13 | -0.208569 | -0.671955 | 0.849007  | 1.000000   |
| 353  | GOBP-POSITIVE-REGULATION-OF-TRANSFERASE-ACTIVITY   | GO-0051347    | 19 | -0.189698 | -0.675121 | 0.847074  | 1.000000   |
| 354  | REACTOME-INFECTIOUS-DISEASE                        | R-HSA-5663205 | 12 | -0.216988 | -0.677693 | 0.872951  | 1.000000   |
| 355  | GOBP-CELLULAR-RESPONSE-TO-HORMONE-STIMULUS         | GO-0032870    | 11 | -0.227220 | -0.683277 | 0.850350  | 1.000000   |
| 356  | GOBP-REGULATION-OF-LONG-TERM-SYNAPTIC-POTENTIAL... | GO-1900271    | 6  | -0.275500 | -0.686393 | 0.857364  | 1.000000   |
| 357  | GOBP-POSITIVE-REGULATION-OF-GROWTH                 | GO-0045927    | 9  | -0.247927 | -0.688416 | 0.853623  | 1.000000   |
| 358  | GOBP-DEVELOPMENTAL-MATURATION                      | GO-0021700    | 5  | -0.299141 | -0.689233 | 0.858034  | 1.000000   |
| 359  | GOBP-ERK1-AND-ERK2-CASCADE                         | GO-0070371    | 5  | -0.291635 | -0.691633 | 0.867669  | 1.000000   |
| 360  | GOBP-CELL-CELL-JUNCTION-ORGANIZATION               | GO-0045216    | 6  | -0.280364 | -0.693507 | 0.838710  | 1.000000   |
| 361  | GOBP-PEPTIDE-METABOLIC-PROCESS                     | GO-0006518    | 11 | -0.227051 | -0.695085 | 0.858956  | 1.000000   |
| 362  | GOBP-RESPONSE-TO-MONOSACCHARIDE                    | GO-0034284    | 6  | -0.297300 | -0.695934 | 0.861538  | 1.000000   |
| 363  | GOBP-REGULATION-OF-PROTEIN-LOCALIZATION-TO-CEL...  | GO-1904375    | 6  | -0.284474 | -0.696862 | 0.859216  | 1.000000   |
| 364  | GOBP-REGULATION-OF-CATABOLIC-PROCESS               | GO-0009894    | 13 | -0.215512 | -0.698101 | 0.828104  | 1.000000   |
| 365  | GOBP-STRIATED-MUSCLE-CELL-DIFFERENTIATION          | GO-0051146    | 9  | -0.244568 | -0.698942 | 0.839525  | 1.000000   |
| 366  | GOBP-REGULATION-OF-CELLULAR-CATABOLIC-PROCESS      | GO-0031329    | 10 | -0.237344 | -0.702082 | 0.850000  | 1.000000   |
| 367  | GOBP-NEGATIVE-REGULATION-OF-NERVOUS-SYSTEM-DEV...  | GO-0051961    | 5  | -0.297474 | -0.702912 | 0.864742  | 1.000000   |
| 368  | GOBP-GLIAL-CELL-DIFFERENTIATION                    | GO-0010001    | 10 | -0.241437 | -0.703706 | 0.813044  | 1.000000   |
| 369  | GOBP-RESPONSE-TO-CARBOHYDRATE                      | GO-0009743    | 5  | -0.297300 | -0.704735 | 0.840601  | 1.000000   |
| 370  | GOBP-MULTICELLULAR-ORGANISMAL-HOMEOSTASIS          | GO-0048871    | 12 | -0.232006 | -0.707349 | 0.811554  | 1.000000   |
| 371  | REACTOME-DISEASES-OF-SIGNAL-TRANSDUCTION-BY-GR...  | R-HSA-5663202 | 12 | -0.227756 | -0.707473 | 0.836364  | 1.000000   |
| 372  | GOBP-REGULATION-OF-MITOTIC-CELL-CYCLE              | GO-0007346    | 5  | -0.310461 | -0.713380 | 0.811679  | 1.000000   |
| 373  | GOBP-RESPONSE-TO-METAL-ION                         | GO-0010038    | 15 | -0.217060 | -0.713842 | 0.841678  | 1.000000   |
| 374  | GOBP-CELLULAR-RESPONSE-TO-DNA-DAMAGE-STIMULUS      | GO-0006974    | 5  | -0.308476 | -0.714549 | 0.814590  | 1.000000   |
| 375  | GOBP-RESPONSE-TO-STARVATION                        | GO-0042594    | 5  | -0.311379 | -0.717850 | 0.813814  | 1.000000   |
| 376  | GOBP-DEVELOPMENTAL-GROWTH                          | GO-0048589    | 10 | -0.249504 | -0.719140 | 0.840112  | 1.000000   |
| 377  | GOBP-TAXIS                                         | GO-0042330    | 14 | -0.222258 | -0.720601 | 0.817321  | 1.000000   |
| 378  | GOBP-DEVELOPMENTAL-PROCESS-INVOLVED-IN-REPRODU...  | GO-0003006    | 11 | -0.238661 | -0.722136 | 0.834294  | 1.000000   |
| 379  | GOBP-NEUROGENESIS                                  | GO-0022008    | 41 | -0.177027 | -0.723212 | 0.796818  | 1.000000   |
| 380  | GOBP-NEGATIVE-REGULATION-OF-SYNAPTIC-TRANSMISSION  | GO-0050805    | 6  | -0.293251 | -0.725119 | 0.824060  | 1.000000   |
| 381  | GOBP-CELLULAR-RESPONSE-TO-STARVATION               | GO-0009267    | 5  | -0.311379 | -0.728551 | 0.822400  | 1.000000   |
| 382  | GOBP-POSITIVE-REGULATION-OF-INTRACELLULAR-SIGN...  | GO-1902533    | 14 | -0.223275 | -0.729047 | 0.800813  | 1.000000   |
| 383  | GOBP-REGULATION-OF-VESICLE-MEDIATED-TRANSPORT      | GO-0060627    | 12 | -0.233668 | -0.730291 | 0.813423  | 1.000000   |
| 384  | GOBP-RESPONSE-TO-INORGANIC-SUBSTANCE               | GO-0010035    | 19 | -0.208714 | -0.731355 | 0.824011  | 1.000000   |

Continuation of Table S2

| NAME | ID                                                | SIZE         | ES        | NES       | NOM.p.val | FDR.q.val | FWER.p.val |
|------|---------------------------------------------------|--------------|-----------|-----------|-----------|-----------|------------|
| 385  | GOBP-REGULATION-OF-HYDROLASE-ACTIVITY             | 22           | -0.202739 | -0.740649 | 0.791403  | 1.000000  | 1.000      |
| 386  | GOBP-POSITIVE-REGULATION-OF-MOLECULAR-FUNCTION    | 37           | -0.187327 | -0.750831 | 0.764852  | 1.000000  | 1.000      |
| 387  | GOBP-NEGATIVE-REGULATION-OF-SIGNALING             | 21           | -0.208100 | -0.751349 | 0.797635  | 1.000000  | 1.000      |
| 388  | GOBP-RESPONSE-TO-DRUG                             | 11           | -0.251497 | -0.753562 | 0.770515  | 1.000000  | 1.000      |
| 389  | GOBP-LONG-TERM-MEMORY                             | 6            | -0.303552 | -0.754048 | 0.786687  | 1.000000  | 1.000      |
| 390  | GOBP-SMALL-MOLECULE-BIOSYNTHETIC-PROCESS          | 5            | -0.326053 | -0.756275 | 0.793510  | 1.000000  | 1.000      |
| 391  | GOBP-PROTEIN-MODIFICATION-BY-SMALL-PROTEIN-CON... | 6            | -0.311944 | -0.760384 | 0.767442  | 1.000000  | 1.000      |
| 392  | GOBP-ORGANOPHOSPHATE-METABOLIC-PROCESS            | 8            | -0.276638 | -0.763487 | 0.756914  | 1.000000  | 1.000      |
| 393  | GOBP-RESPIRATORY-SYSTEM-DEVELOPMENT               | 6            | -0.301638 | -0.763542 | 0.770393  | 1.000000  | 1.000      |
| 394  | GOBP-POSTSYNAPSE-ORGANIZATION                     | 10           | -0.262365 | -0.765231 | 0.765739  | 1.000000  | 1.000      |
| 395  | GOBP-PROTEIN-LOCALIZATION-TO-CELL-PERIPHERY       | 12           | -0.247152 | -0.768112 | 0.745179  | 1.000000  | 1.000      |
| 396  | GOBP-POSITIVE-REGULATION-OF-LONG-TERM-SYNAPTIC... | 5            | -0.331576 | -0.771117 | 0.768049  | 1.000000  | 1.000      |
| 397  | GOBP-REGULATION-OF-ORGANELLE-ORGANIZATION         | 14           | -0.236347 | -0.771456 | 0.756393  | 1.000000  | 1.000      |
| 398  | REACTOME-ANTI-INFLAMMATORY-RESPONSE-FAVOURING...  | 5            | -0.342290 | -0.773489 | 0.769953  | 1.000000  | 1.000      |
| 399  | GOBP-LOCOMOTION                                   | 31           | -0.198729 | -0.773979 | 0.747112  | 1.000000  | 1.000      |
| 400  | GOBP-MATERNAL-PROCESS-INVOLVED-IN-FEMALE-PREGN... | 5            | -0.334101 | -0.778829 | 0.735614  | 1.000000  | 1.000      |
| 401  | GOBP-POSITIVE-REGULATION-OF-EPITHELIAL-CELL-MI... | 5            | -0.338305 | -0.781744 | 0.789474  | 1.000000  | 1.000      |
| 402  | GOBP-BIOLOGICAL-PROCESS-INVOLVED-IN-SYMBIOTIC...  | 10           | -0.271201 | -0.782893 | 0.744681  | 1.000000  | 1.000      |
| 403  | GOBP-NEURON-DIFFERENTIATION                       | 37           | -0.195949 | -0.784380 | 0.740050  | 1.000000  | 1.000      |
| 404  | GOBP-REGULATION-OF-SYNAPSE-STRUCTURE-OR-ACTIVITY  | 11           | -0.255691 | -0.785471 | 0.732606  | 1.000000  | 1.000      |
| 405  | GOBP-NEGATIVE-REGULATION-OF-BINDING               | 6            | -0.316559 | -0.786286 | 0.736215  | 1.000000  | 1.000      |
| 406  | GOBP-REGULATION-OF-CELL-PROJECTION-ORGANIZATION   | 20           | -0.220944 | -0.788056 | 0.768725  | 1.000000  | 1.000      |
| 407  | GOBP-EXOCYTOSIS                                   | 11           | -0.265448 | -0.788260 | 0.758133  | 1.000000  | 1.000      |
| 408  | GOBP-REGULATION-OF-CYSTEINE-TYPE-ENDOPEPTIDASE... | 9            | -0.284756 | -0.795820 | 0.730994  | 1.000000  | 1.000      |
| 409  | GOBP-ORGANIC-HYDROXY-COMPOUND-METABOLIC-PROCESS   | 8            | -0.289379 | -0.798825 | 0.719168  | 1.000000  | 1.000      |
| 410  | GOBP-BEHAVIOR                                     | 33           | -0.204091 | -0.800811 | 0.729193  | 1.000000  | 1.000      |
| 411  | GOBP-POSITIVE-REGULATION-OF-APOPTOTIC-SIGNALIN... | 5            | -0.341606 | -0.802040 | 0.721386  | 1.000000  | 1.000      |
| 412  | GOBP-SMALL-MOLECULE-METABOLIC-PROCESS             | 16           | -0.237436 | -0.803595 | 0.738526  | 1.000000  | 1.000      |
| 413  | GOBP-CYTOSKELETON-ORGANIZATION                    | 11           | -0.266359 | -0.803693 | 0.735537  | 1.000000  | 1.000      |
| 414  | GOBP-NUCLEOBASE-CONTAINING-SMALL-MOLECULE-META... | 7            | -0.312294 | -0.804345 | 0.700590  | 1.000000  | 1.000      |
| 415  | GOBP-ENDOCYTOSIS                                  | 8            | -0.296944 | -0.805204 | 0.714497  | 1.000000  | 1.000      |
| 416  | GOBP-NEGATIVE-REGULATION-OF-PROTEIN-MODIFICATI... | GO:0031400   | -0.271705 | -0.806007 | 0.719323  | 1.000000  | 1.000      |
| 417  | GOBP-REGULATION-OF-CYTOSKELETON-ORGANIZATION      | GO:0051493   | -0.347092 | -0.807242 | 0.729231  | 1.000000  | 1.000      |
| 418  | GOBP-REGULATION-OF-CELLULAR-PROTEIN-LOCALIZATION  | GO:1903827   | -0.263226 | -0.809202 | 0.708049  | 1.000000  | 1.000      |
| 419  | GOBP-CELL-MIGRATION                               | GO:0016477   | -0.221668 | -0.810406 | 0.718147  | 1.000000  | 1.000      |
| 420  | GOBP-DENDRITIC-SPINE-MORPHOGENESIS                | GO:0060997   | -0.342626 | -0.812545 | 0.729521  | 1.000000  | 1.000      |
| 421  | GOBP-MULTI-ORGANISM-PROCESS                       | GO:0051704   | -0.237337 | -0.812756 | 0.712925  | 1.000000  | 1.000      |
| 422  | GOBP-BIOLOGICAL-ADHESION                          | GO:0022610   | -0.238145 | -0.814362 | 0.717131  | 1.000000  | 1.000      |
| 423  | GOBP-REGULATION-OF-CELLULAR-LOCALIZATION          | GO:0060341   | -0.238145 | -0.820208 | 0.686934  | 1.000000  | 1.000      |
| 424  | REACTOME-ONCOGENIC-MAPK-SIGNALING                 | R-HSA-680295 | -0.356466 | -0.820738 | 0.713202  | 1.000000  | 1.000      |
| 425  | GOBP-MYELOID-LEUKOCYTE-ACTIVATION                 | GO:0002274   | -0.299911 | -0.821491 | 0.701318  | 1.000000  | 1.000      |
| 426  | GOBP-PROTEIN-PHOSPHORYLATION                      | GO:006468    | -0.210224 | -0.826240 | 0.711223  | 1.000000  | 1.000      |
| 427  | GOBP-REGULATION-OF-ORGAN-GROWTH                   | GO:0046620   | -0.367800 | -0.836898 | 0.690402  | 1.000000  | 1.000      |



Continuation of Table S2

| NAME                                              | ID            | SIZE | ES        | NES       | NOM.p.val | FDR.q.val | FWER.p.val |
|---------------------------------------------------|---------------|------|-----------|-----------|-----------|-----------|------------|
| GOBP-REGULATION-OF-PEPTIDE-SECRETION              | GO-0002791    | 7    | -0.323610 | -0.838777 | 0.687407  | 1.000000  | 1.000      |
| GOBP-REGULATION-OF-ENDOTHELIAL-CELL-MIGRATION     | GO-0010594    | 5    | -0.358628 | -0.839037 | 0.687500  | 1.000000  | 1.000      |
| GOBP-RESPONSE-TO-PEPTIDE-HORMONE                  | GO-0043434    | 13   | -0.266388 | -0.846000 | 0.662873  | 1.000000  | 1.000      |
| GOBP-NERVOUS-SYSTEM-PROCESS                       | GO-0050877    | 38   | -0.208365 | -0.846851 | 0.665446  | 1.000000  | 1.000      |
| GOBP-HORMONE-TRANSPORT                            | GO-0009914    | 9    | -0.300527 | -0.853920 | 0.657593  | 1.000000  | 1.000      |
| GOBP-CELL-MORPHOGENESIS-INVOLVED-IN-DIFFERENTI... | GO-0000904    | 22   | -0.232577 | -0.858501 | 0.654568  | 1.000000  | 1.000      |
| GOBP-REGULATION-OF-METAL-ION-TRANSPORT            | GO-0010959    | 6    | -0.350443 | -0.863581 | 0.665667  | 1.000000  | 1.000      |
| GOBP-NEGATIVE-REGULATION-OF-CELLULAR-COMPONENT... | GO-0051129    | 11   | -0.287791 | -0.863801 | 0.644476  | 1.000000  | 1.000      |
| GOBP-ORGAN-GROWTH                                 | GO-0035265    | 5    | -0.367800 | -0.864454 | 0.666667  | 1.000000  | 1.000      |
| GOBP-CELL-MORPHOGENESIS-INVOLVED-IN-NEURON-DIF... | GO-0048667    | 22   | -0.232577 | -0.867671 | 0.617725  | 1.000000  | 1.000      |
| GOBP-POSITIVE-REGULATION-OF-HYDROLASE-ACTIVITY    | GO-0051345    | 16   | -0.256692 | -0.867713 | 0.613281  | 1.000000  | 1.000      |
| GOBP-IMMUNE-EFFECTOR-PROCESS                      | GO-0002252    | 11   | -0.285153 | -0.873340 | 0.632737  | 0.997849  | 1.000      |
| GOBP-REGULATION-OF-HORMONE-SECRETION              | GO-0046883    | 8    | -0.318326 | -0.876584 | 0.625731  | 0.994141  | 1.000      |
| REACTOME-EPH-EPHRIN-SIGNALING                     | R-RNO-2682334 | 6    | -0.354703 | -0.877481 | 0.628571  | 0.995784  | 1.000      |
| GOBP-ORGANIC-HYDROXY-COMPOUND-TRANSPORT           | GO-0015850    | 6    | -0.344268 | -0.878627 | 0.622388  | 0.996941  | 1.000      |
| GOBP-NEGATIVE-REGULATION-OF-RESPONSE-TO-STIMULUS  | GO-0048585    | 16   | -0.259419 | -0.879063 | 0.646053  | 0.999581  | 1.000      |
| GOBP-ERBB-SIGNALING-PATHWAY                       | GO-00038127   | 5    | -0.377641 | -0.884023 | 0.623234  | 0.992558  | 1.000      |
| GOBP-ORGANONITROGEN-COMPOUND-BIOSYNTHETIC-PROCESS | GO-1901566    | 13   | -0.283564 | -0.891715 | 0.600801  | 0.979697  | 1.000      |
| GOBP-POLYSACCHARIDE-METABOLIC-PROCESS             | GO-0005976    | 5    | -0.382944 | -0.892400 | 0.615262  | 0.981657  | 1.000      |
| GOBP-REGULATION-OF-INTRACELLULAR-SIGNAL-TRANSD... | GO-1902531    | 21   | -0.242174 | -0.893651 | 0.590793  | 0.982581  | 1.000      |
| GOBP-POSITIVE-REGULATION-OF-ANION-TRANSPORT       | GO-1903793    | 9    | -0.307096 | -0.894321 | 0.577201  | 0.984660  | 1.000      |
| GOBP-REGULATION-OF-WNT-SIGNALING-PATHWAY          | GO-0030111    | 5    | -0.382454 | -0.895705 | 0.597015  | 0.985260  | 1.000      |
| GOBP-REGULATION-OF-RESPONSE-TO-EXTERNAL-STIMULUS  | GO-0032101    | 15   | -0.266988 | -0.898297 | 0.588549  | 0.983143  | 1.000      |
| GOBP-INSULIN-SECRETION                            | GO-0030073    | 7    | -0.344258 | -0.899369 | 0.618128  | 0.984361  | 1.000      |
| GOBP-AMIDE-BIOSYNTHETIC-PROCESS                   | GO-0043604    | 6    | -0.370029 | -0.899386 | 0.607784  | 0.987944  | 1.000      |
| REACTOME-PLATELET-ACTIVATION-SIGNALING-AND-AGG... | R-HSA-76002   | 7    | -0.346693 | -0.901057 | 0.597365  | 0.987858  | 1.000      |
| GOBP-PEPTIDE-HORMONE-SECRETION                    | GO-0030072    | 7    | -0.344258 | -0.901147 | 0.608504  | 0.991295  | 1.000      |
| GOBP-REGULATION-OF-CARBOHYDRATE-METABOLIC-PROCESS | GO-0006109    | 5    | -0.390162 | -0.901954 | 0.605016  | 0.993180  | 1.000      |
| GOBP-CHROMATIN-ORGANIZATION                       | GO-0006325    | 5    | -0.391354 | -0.904599 | 0.582953  | 0.990804  | 1.000      |
| GOBP-CARBOHYDRATE-BIOSYNTHETIC-PROCESS            | GO-0016051    | 5    | -0.390162 | -0.905407 | 0.570776  | 0.992856  | 1.000      |
| GOBP-MULTICELLULAR-ORGANISM-REPRODUCTION          | GO-0032504    | 12   | -0.292300 | -0.909353 | 0.555710  | 0.987683  | 1.000      |
| GOBP-CELLULAR-RESPONSE-TO-LIPID                   | GO-0071396    | 15   | -0.280883 | -0.909715 | 0.584131  | 0.990526  | 1.000      |
| GOBP-MYOTUBE-DIFFERENTIATION                      | GO-0014902    | 5    | -0.397590 | -0.914068 | 0.578370  | 0.984461  | 1.000      |
| GOBP-MUSCLE-ORGAN-DEVELOPMENT                     | GO-0007517    | 9    | -0.315704 | -0.914258 | 0.576487  | 0.987756  | 1.000      |
| GOBP-POSITIVE-REGULATION-OF-EPITHELIAL-CELL-PR... | GO-0050679    | 7    | -0.352755 | -0.914427 | 0.570381  | 0.991064  | 1.000      |
| GOBP-REGULATION-OF-CARBOHYDRATE-BIOSYNTHETIC-P... | GO-0043255    | 5    | -0.390162 | -0.918038 | 0.569733  | 0.986280  | 1.000      |
| GOBP-NEGATIVE-REGULATION-OF-CELL-CYCLE            | GO-0045786    | 5    | -0.388723 | -0.919240 | 0.587025  | 0.987321  | 1.000      |
| GOBP-REGULATION-OF-MAPK-CASCADE                   | GO-0043468    | 13   | -0.289289 | -0.922039 | 0.553521  | 0.984860  | 1.000      |
| GOBP-REGULATION-OF-TRANSMEMBRANE-TRANSPORT        | GO-0034702    | 23   | -0.252831 | -0.923919 | 0.560468  | 0.984233  | 1.000      |
| GOBP-PEPTIDE-BIOSYNTHETIC-PROCESS                 | GO-0043043    | 6    | -0.370029 | -0.924773 | 0.549777  | 0.986246  | 1.000      |
| REACTOME-EXTRACELLULAR-MATRIX-ORGANIZATION        | R-RNO-1474244 | 5    | -0.402623 | -0.924862 | 0.568421  | 0.989861  | 1.000      |
| GOBP-POSITIVE-REGULATION-OF-SIGNALING             | GO-0023056    | 34   | -0.233837 | -0.928207 | 0.554020  | 0.985836  | 1.000      |
| GOBP-ACTIVATION-OF-IMMUNE-RESPONSE                | GO-0002253    | 5    | -0.398977 | -0.931272 | 0.562021  | 0.982758  | 1.000      |

Continuation of Table S2

|     | NAME                                                        | ID            | SIZE | ES        | NES       | NOM.p.val | FDR.q.val | FWER.p.val |
|-----|-------------------------------------------------------------|---------------|------|-----------|-----------|-----------|-----------|------------|
| 471 | GOBP-MACROMOLECULE-CATABOLIC-PROCESS                        | GO-0009057    | 11   | -0.312774 | -0.933947 | 0.543759  | 0.980494  | 1.000      |
| 472 | GOBP-NEGATIVE-REGULATION-OF-DEVELOPMENTAL-PROCESS           | GO-0051093    | 13   | -0.294654 | -0.939314 | 0.545076  | 0.972055  | 1.000      |
| 473 | GOBP-DENDRITIC-SPINE-DEVELOPMENT                            | GO-0060996    | 6    | -0.381641 | -0.942065 | 0.538117  | 0.969385  | 1.000      |
| 474 | GOBP-POSITIVE-REGULATION-OF-SYNAPTIC-TRANSMISSION           | GO-0050806    | 15   | -0.275759 | -0.945032 | 0.503365  | 0.966285  | 1.000      |
| 475 | GOBP-NEGATIVE-REGULATION-OF-PHOSPHORUS-METABOLISM           | GO-0010563    | 9    | -0.338728 | -0.947657 | 0.524854  | 0.964151  | 1.000      |
| 476 | GOBP-NEGATIVE-REGULATION-OF-CELL-DIFFERENTIATION            | GO-0045596    | 13   | -0.294654 | -0.948097 | 0.515646  | 0.966989  | 1.000      |
| 477 | GOBP-CENTRAL-NERVOUS-SYSTEM-NEURON-DIFFERENTIATION          | GO-0021953    | 5    | -0.405736 | -0.949488 | 0.541411  | 0.967592  | 1.000      |
| 478 | GOBP-NEURON-DEVELOPMENT                                     | GO-0048666    | 34   | -0.241040 | -0.952251 | 0.532746  | 0.964906  | 1.000      |
| 479 | GOBP-CELLULAR-AMIDE-METABOLIC-PROCESS                       | GO-0043603    | 12   | -0.308177 | -0.954238 | 0.510578  | 0.964061  | 1.000      |
| 480 | GOBP-POSITIVE-REGULATION-OF-CATALYTIC-ACTIVITY              | GO-0043085    | 29   | -0.248073 | -0.956300 | 0.518566  | 0.963177  | 1.000      |
| 481 | GOBP-REGULATION-OF-CELLULAR-COMPONENT-MOVEMENT              | GO-0051270    | 15   | -0.286914 | -0.957512 | 0.533153  | 0.964175  | 1.000      |
| 482 | GOBP-REGULATION-OF-NEURONAL-SYNAPTIC-PLASTICITY             | GO-0048168    | 7    | -0.358404 | -0.958139 | 0.523169  | 0.966546  | 1.000      |
| 483 | GOBP-NEGATIVE-REGULATION-OF-ION-TRANSPORT                   | GO-0043271    | 11   | -0.321600 | -0.960395 | 0.514936  | 0.964994  | 1.000      |
| 484 | GOBP-NEGATIVE-REGULATION-OF-INTRACELLULAR-SIGNALING         | GO-1902532    | 7    | -0.362562 | -0.960469 | 0.512012  | 0.968770  | 1.000      |
| 485 | GOBP-MUSCLE-CELL-DIFFERENTIATION                            | GO-0042692    | 10   | -0.323984 | -0.961032 | 0.513630  | 0.971468  | 1.000      |
| 486 | GOBP-REGULATION-OF-MAP-KINASE-ACTIVITY                      | GO-0043405    | 9    | -0.342459 | -0.961560 | 0.530410  | 0.974087  | 1.000      |
| 487 | GOBP-CIRCADIAN-RHYTHM                                       | GO-0007623    | 13   | -0.305956 | -0.963432 | 0.502688  | 0.973612  | 1.000      |
| 488 | GOBP-ENDOCRINE-SYSTEM-DEVELOPMENT                           | GO-0035270    | 6    | -0.396638 | -0.963598 | 0.541353  | 0.977309  | 1.000      |
| 489 | GOBP-CALCIUM-MEDIATED-SIGNALING                             | GO-0019722    | 10   | -0.325941 | -0.966247 | 0.491620  | 0.974826  | 1.000      |
| 490 | GOBP-PEPTIDE-SECRETION                                      | GO-0002790    | 9    | -0.341594 | -0.966577 | 0.502140  | 0.978166  | 1.000      |
| 491 | GOBP-NEURON-PROJECTION-GUIDANCE                             | GO-0097485    | 9    | -0.337170 | -0.970827 | 0.509573  | 0.971536  | 1.000      |
| 492 | GOBP-POSITIVE-REGULATION-OF-PROTEIN-SERINE-THREONINE-KINASE | GO-0071902    | 9    | -0.342700 | -0.972668 | 0.490701  | 0.971198  | 1.000      |
| 493 | GOBP-RESPONSE-TO-KETONE                                     | GO-1901654    | 7    | -0.375973 | -0.972820 | 0.512195  | 0.975011  | 1.000      |
| 494 | REACTOME-INNATE-IMMUNE-SYSTEM                               | R-RNO-168249  | 16   | -0.288357 | -0.972842 | 0.496680  | 0.979170  | 1.000      |
| 495 | GOBP-REGULATION-OF-PEPTIDE-HORMONE-SECRETION                | GO-0090276    | 6    | -0.395451 | -0.974551 | 0.484756  | 0.979196  | 1.000      |
| 496 | REACTOME-NEUTROPHIL-DEGRANULATION                           | R-RNO-6798695 | 6    | -0.396667 | -0.976684 | 0.508246  | 0.978031  | 1.000      |
| 497 | GOBP-CELLULAR-CARBOHYDRATE-METABOLIC-PROCESS                | GO-0044262    | 5    | -0.419927 | -0.978041 | 0.496979  | 0.978885  | 1.000      |
| 498 | GOBP-RESPONSE-TO-HEAT                                       | GO-0009408    | 7    | -0.372100 | -0.978883 | 0.506667  | 0.981178  | 1.000      |
| 499 | GOBP-LONG-TERM-SYNAPTIC-POTENTIATION                        | GO-0060291    | 12   | -0.312859 | -0.979371 | 0.481638  | 0.984255  | 1.000      |
| 500 | GOBP-REGULATION-OF-PROTEIN-SERINE-THREONINE-KINASE          | GO-0071900    | 12   | -0.316089 | -0.979436 | 0.492997  | 0.988442  | 1.000      |
| 501 | REACTOME-VESICLE-MEDIATED-TRANSPORT                         | R-RNO-5653656 | 5    | -0.425419 | -0.987458 | 0.467669  | 0.971921  | 1.000      |
| 502 | GOBP-CELL-ACTIVATION-INVOLVED-IN-IMMUNE-RESPONSE            | GO-0002263    | 6    | -0.396667 | -0.991190 | 0.488722  | 0.966459  | 1.000      |
| 503 | GOBP-POSITIVE-REGULATION-OF-ESTABLISHMENT-OF-POLARITY       | GO-1904951    | 5    | -0.420890 | -0.994911 | 0.482759  | 0.961393  | 1.000      |
| 504 | GOBP-VESICLE-MEDIATED-TRANSPORT-IN-SYNAPSE                  | GO-0099003    | 7    | -0.382716 | -0.994981 | 0.483533  | 0.965526  | 1.000      |
| 505 | REACTOME-TOLL-LIKE-RECEPTOR-TLR1-TLR2-CASCADE               | R-RNO-168179  | 8    | -0.372989 | -0.997163 | 0.484581  | 0.964256  | 1.000      |
| 506 | GOBP-POSITIVE-REGULATION-OF-ENDOTHELIAL-CELL-PROLIFERATION  | GO-0001938    | 6    | -0.401205 | -0.997302 | 0.480858  | 0.968206  | 1.000      |
| 507 | GOBP-CIRCULATORY-SYSTEM-PROCESS                             | GO-0003013    | 5    | -0.430008 | -0.997573 | 0.474654  | 0.971899  | 1.000      |
| 508 | REACTOME-TOLL-LIKE-RECEPTOR-9-TLR9-CASCADE                  | R-RNO-168138  | 8    | -0.372989 | -0.998367 | 0.464888  | 0.974219  | 1.000      |
| 509 | GOBP-REGULATION-OF-GTPASE-ACTIVITY                          | GO-0043087    | 5    | -0.425761 | -1.001446 | 0.485075  | 0.970625  | 1.000      |
| 510 | GOBP-REGULATION-OF-GROWTH                                   | GO-0040008    | 13   | -0.310538 | -1.002497 | 0.473538  | 0.972289  | 1.000      |
| 511 | GOBP-MUSCLE-CELL-DEVELOPMENT                                | GO-0055001    | 5    | -0.437716 | -1.003272 | 0.471212  | 0.974670  | 1.000      |
| 512 | REACTOME-MEMBRANE-TRAFFICKING                               | R-RNO-199991  | 5    | -0.425419 | -1.003789 | 0.466563  | 0.977891  | 1.000      |
| 513 | GOBP-ANATOMICAL-STRUCTURE-HOMEOSTASIS                       | GO-0060249    | 7    | -0.384362 | -1.004579 | 0.467262  | 0.980449  | 1.000      |

Continuation of Table S2

| NAME | ID                                                | SIZE | ES        | NES       | NOM.p.val | FDR.q.val | FWER.p.val |
|------|---------------------------------------------------|------|-----------|-----------|-----------|-----------|------------|
| 514  | GOBP-RESPONSE.TO.ALKALOID                         | 5    | -0.440285 | -1.007550 | 0.465224  | 0.977129  | 1.000      |
| 515  | GOBP-CELLULAR.MACROMOLECULE.LOCALIZATION          | 20   | -0.287657 | -1.009095 | 0.456209  | 0.977579  | 1.000      |
| 516  | GOBP-MYELOID-LEUKOCYTE-MEDIATED-IMMUNITY          | 6    | -0.396667 | -1.009402 | 0.444795  | 0.981374  | 1.000      |
| 517  | REACTOME-TOLL-LIKE-RECEPTOR-CASCADES              | 8    | -0.372989 | -1.009612 | 0.470085  | 0.985555  | 1.000      |
| 518  | GOBP-LEUKOCYTE-MIGRATION                          | 6    | -0.406479 | -1.009729 | 0.431085  | 0.990005  | 1.000      |
| 519  | GOBP-POSITIVE-REGULATION-OF-CELLULAR-PROTEIN.L... | 7    | -0.383383 | -1.010994 | 0.449405  | 0.991259  | 1.000      |
| 520  | GOBP-POSITIVE-REGULATION-OF-PROTEOLYSIS           | 8    | -0.372698 | -1.011490 | 0.463557  | 0.994639  | 1.000      |
| 521  | GOBP-NEURON-PROJECTION-ORGANIZATION               | 8    | -0.368945 | -1.014573 | 0.441595  | 0.990987  | 1.000      |
| 522  | GOBP-PROTEIN-LOCALIZATION.TO-CELL-JUNCTION        | 6    | -0.413131 | -1.014950 | 0.476762  | 0.994597  | 1.000      |
| 523  | GOBP-PROTEIN-DEPHOSPHORYLATION                    | 7    | -0.382179 | -1.015843 | 0.442363  | 0.997053  | 1.000      |
| 524  | GOBP-REGULATION-OF-CELL-CYCLE                     | 13   | -0.319186 | -1.016073 | 0.444598  | 1.000000  | 1.000      |
| 525  | GOBP-DEPHOSPHORYLATION                            | 7    | -0.382179 | -1.017675 | 0.433048  | 1.000000  | 1.000      |
| 526  | GOBP-REGULATION-OF-CELLULAR-RESPONSE.TO-STRESS    | 9    | -0.360298 | -1.019560 | 0.450216  | 1.000000  | 1.000      |
| 527  | GOBP-CELL-PROJECTION-ORGANIZATION                 | 35   | -0.256067 | -1.019747 | 0.442211  | 1.000000  | 1.000      |
| 528  | GOBP-REGULATION-OF-RESPONSE.TO-STRESS             | 19   | -0.286207 | -1.021829 | 0.430446  | 1.000000  | 1.000      |
| 529  | GOBP-POSITIVE-REGULATION-OF-PEPTIDASE-ACTIVITY    | 7    | -0.395871 | -1.024942 | 0.430124  | 1.000000  | 1.000      |
| 530  | GOBP-REGULATION-OF-LIPID-LOCALIZATION             | 5    | -0.437572 | -1.025840 | 0.442249  | 1.000000  | 1.000      |
| 531  | REACTOME-MYD88-INDEPENDENT-TLR4-CASCADE           | 8    | -0.372989 | -1.027387 | 0.415473  | 1.000000  | 1.000      |
| 532  | GOBP-ESTABLISHMENT-OF-PROTEIN-LOCALIZATION        | 17   | -0.301025 | -1.027400 | 0.428571  | 1.000000  | 1.000      |
| 533  | GOBP-NEGATIVE-REGULATION-OF-TRANSPORT             | 13   | -0.317179 | -1.028373 | 0.435967  | 1.000000  | 1.000      |
| 534  | GOBP-CELL-GROWTH                                  | 10   | -0.356386 | -1.029903 | 0.432773  | 1.000000  | 1.000      |
| 535  | GOBP-POSITIVE-REGULATION-OF-CYSTEINE-TYPE-ENDO... | 7    | -0.392871 | -1.032287 | 0.452489  | 1.000000  | 1.000      |
| 536  | GOBP-REGULATION-OF-NEUROTRANSMITTER-TRANSPORT     | 6    | -0.414634 | -1.032350 | 0.406907  | 1.000000  | 1.000      |
| 537  | REACTOME-LEISHMANIA-INFECTION                     | 10   | -0.347032 | -1.033476 | 0.425034  | 1.000000  | 1.000      |
| 538  | REACTOME-NERVOUS-SYSTEM-DEVELOPMENT               | 14   | -0.316682 | -1.034492 | 0.423288  | 1.000000  | 1.000      |
| 539  | REACTOME-MAPK-TARGETS-NUCLEAR-EVENTS-MEDIATED...  | 5    | -0.443061 | -1.034742 | 0.418182  | 1.000000  | 1.000      |
| 540  | GOBP-LEUKOCYTE-MEDIATED-IMMUNITY                  | 8    | -0.382515 | -1.035226 | 0.419971  | 1.000000  | 1.000      |
| 541  | GOBP-INTRACELLULAR-TRANSPORT                      | 10   | -0.352990 | -1.041010 | 0.437946  | 1.000000  | 1.000      |
| 542  | GOBP-WOUND-HEALING                                | 13   | -0.320977 | -1.043331 | 0.402579  | 1.000000  | 1.000      |
| 543  | GOBP-NEGATIVE-REGULATION-OF-PHOSPHORYLATION       | 7    | -0.398240 | -1.045222 | 0.429395  | 1.000000  | 1.000      |
| 544  | GOBP-REGULATION-OF-NERVOUS-SYSTEM-PROCESS         | 8    | -0.386354 | -1.045414 | 0.407143  | 1.000000  | 1.000      |
| 545  | GOBP-IMMUNE-RESPONSE-REGULATING-SIGNALING-PATHWAY | 8    | -0.386391 | -1.050992 | 0.400875  | 1.000000  | 1.000      |
| 546  | GOBP-CIRCADIAN-REGULATION-OF-GENE-EXPRESSION      | 5    | -0.451813 | -1.053837 | 0.390840  | 1.000000  | 1.000      |
| 547  | GOBP-PROTEOLYSIS                                  | 17   | -0.306120 | -1.056996 | 0.397919  | 1.000000  | 1.000      |
| 548  | GOBP-REGULATION-OF-TRANSPORTER-ACTIVITY           | 17   | -0.304602 | -1.058924 | 0.400268  | 1.000000  | 1.000      |
| 549  | GOBP-FC-RECEPTOR-SIGNALING-PATHWAY                | 8    | -0.386391 | -1.059190 | 0.402878  | 1.000000  | 1.000      |
| 550  | GOBP-LIPID-LOCALIZATION                           | 10   | -0.366699 | -1.061920 | 0.372024  | 1.000000  | 1.000      |
| 551  | GOBP-INTRACELLULAR-PROTEIN-TRANSPORT              | 8    | -0.394335 | -1.062952 | 0.396226  | 1.000000  | 1.000      |
| 552  | GOBP-LIPID-EXPORT-FROM-CELL                       | 5    | -0.456163 | -1.066032 | 0.412873  | 1.000000  | 1.000      |
| 553  | REACTOME-INTERFERON-SIGNALING                     | 7    | -0.425840 | -1.067031 | 0.391705  | 1.000000  | 1.000      |
| 554  | REACTOME-TRANSCRIPTIONAL-REGULATION-BY-MECP2      | 6    | -0.407407 | -1.068152 | 0.375546  | 1.000000  | 1.000      |
| 555  | GOBP-POSITIVE-REGULATION-OF-SECRETION             | 6    | -0.429704 | -1.071394 | 0.377001  | 1.000000  | 1.000      |
| 556  | REACTOME-CIRCADIAN-CLOCK                          | 5    | -0.457831 | -1.074296 | 0.379464  | 1.000000  | 1.000      |

Continuation of Table S2

| NAME                                                  | ID            | SIZE | ES        | NES       | NOM.p.val | FDR.q.val | FWER.p.val |
|-------------------------------------------------------|---------------|------|-----------|-----------|-----------|-----------|------------|
| 557 GOBP-CELLULAR-RESPONSE-TO-PEPTIDE-HORMONE-STIM... | GO-0071375    | 9    | -0.379408 | -1.076934 | 0.357771  | 0.998661  | 1.000      |
| 558 GOBP-REGULATION-OF-PROTEIN-LOCALIZATION           | GO-0032880    | 18   | -0.313043 | -1.077578 | 0.377238  | 1.000000  | 1.000      |
| 559 GOBP-CELLULAR-RESPONSE-TO-ALCOHOL                 | GO-0097306    | 5    | -0.470464 | -1.078167 | 0.399096  | 1.000000  | 1.000      |
| 560 GOBP-REGULATION-OF-PEPTIDE-TRANSPORT              | GO-0090087    | 10   | -0.367655 | -1.080792 | 0.361149  | 1.000000  | 1.000      |
| 561 GOBP-REGULATION-OF-SYSTEM-PROCESS                 | GO-0044057    | 18   | -0.310188 | -1.083597 | 0.358768  | 1.000000  | 1.000      |
| 562 REACTOME-DAG-AND-JP3-SIGNALING                    | R-RNO-1489509 | 8    | -0.398245 | -1.084336 | 0.355958  | 1.000000  | 1.000      |
| 563 GOBP-MUSCLE-CONTRACTION                           | GO-0006936    | 5    | -0.475086 | -1.084432 | 0.360182  | 1.000000  | 1.000      |
| 564 GOBP-PLATELET-ACTIVATION                          | GO-0030168    | 6    | -0.439645 | -1.085277 | 0.362952  | 1.000000  | 1.000      |
| 565 GOBP-SYNAPTIC-SIGNALING                           | GO-0099536    | 47   | -0.268839 | -1.085597 | 0.375154  | 1.000000  | 1.000      |
| 566 GOBP-POSITIVE-REGULATION-OF-LOCOMOTION            | GO-0040017    | 11   | -0.360755 | -1.085955 | 0.370319  | 1.000000  | 1.000      |
| 567 REACTOME-L1CAM-INTERACTIONS                       | R-RNO-373760  | 5    | -0.463606 | -1.087414 | 0.388657  | 1.000000  | 1.000      |
| 568 GOBP-CARBOHYDRATE-DERIVATIVE-BIOSYNTHETIC-PROCESS | GO-1901137    | 5    | -0.465896 | -1.088899 | 0.350388  | 1.000000  | 1.000      |
| 569 REACTOME-INTERLEUKIN_I7-SIGNALING                 | R-RNO-448424  | 6    | -0.439454 | -1.088975 | 0.347181  | 1.000000  | 1.000      |
| 570 GOBP-REGULATION-OF-NEUROTRANSMITTER-LEVELS        | GO-0001505    | 7    | -0.419753 | -1.092002 | 0.350725  | 1.000000  | 1.000      |
| 571 GOBP-FATTY-ACID-TRANSPORT                         | GO-0015908    | 6    | -0.445646 | -1.105253 | 0.335294  | 0.992244  | 1.000      |
| 572 GOBP-NEUROTRANSMITTER-TRANSPORT                   | GO-0006836    | 7    | -0.419753 | -1.105305 | 0.330484  | 0.998572  | 1.000      |
| 573 GOBP-GAMETE-GENERATION                            | GO-0007276    | 9    | -0.386609 | -1.107766 | 0.336662  | 0.996697  | 1.000      |
| 574 GOBP-REGULATION-OF-MUSCLE-ADAPTATION              | GO-0043502    | 5    | -0.481928 | -1.109226 | 0.330769  | 0.998466  | 1.000      |
| 575 GOBP-HOMEOSTATIC-PROCESS                          | GO-0042592    | 31   | -0.279633 | -1.110197 | 0.339552  | 1.000000  | 1.000      |
| 576 REACTOME-RNA-POLYMERASE-III-TRANSCRIPTION         | R-RNO-73857   | 20   | -0.310016 | -1.111509 | 0.328125  | 1.000000  | 1.000      |
| 577 GOBP-MUSCLE-ADAPTATION                            | GO-0043500    | 5    | -0.481928 | -1.115123 | 0.333866  | 0.998563  | 1.000      |
| 578 GOBP-PROTEIN-LOCALIZATION-TO-SYNAPSE              | GO-0035418    | 5    | -0.476798 | -1.116602 | 0.320669  | 1.000000  | 1.000      |
| 579 GOBP-NEGATIVE-REGULATION-OF-RESPONSE-TO-EXTERN... | GO-0032102    | 5    | -0.485600 | -1.117970 | 0.324409  | 1.000000  | 1.000      |
| 580 GOBP-MONOCARBOXYLIC-ACID-TRANSPORT                | GO-0015718    | 5    | -0.485881 | -1.119902 | 0.312694  | 1.000000  | 1.000      |
| 581 GOBP-NEGATIVE-REGULATION-OF-ANION-TRANSPORT       | GO-1903792    | 8    | -0.409779 | -1.120853 | 0.338663  | 1.000000  | 1.000      |
| 582 GOBP-ACIDIC-AMINO-ACID-TRANSPORT                  | GO-0015800    | 5    | -0.485881 | -1.124610 | 0.302290  | 1.000000  | 1.000      |
| 583 GOBP-PROTEIN-LOCALIZATION-TO-POSTSYNAPSE          | GO-0062237    | 5    | -0.476798 | -1.125301 | 0.302067  | 1.000000  | 1.000      |
| 584 GOBP-SECRETION                                    | GO-0046903    | 24   | -0.304839 | -1.129857 | 0.301405  | 0.996688  | 1.000      |
| 585 GOBP-DICARBOXYLIC-ACID-TRANSPORT                  | GO-0006835    | 5    | -0.485881 | -1.130764 | 0.293395  | 1.000000  | 1.000      |
| 586 GOBP-REGULATION-OF-CELL-ADHESION                  | GO-0030155    | 13   | -0.354813 | -1.131292 | 0.293706  | 1.000000  | 1.000      |
| 587 GOBP-REGULATION-OF-TRANSPORT                      | GO-0051049    | 44   | -0.278761 | -1.131678 | 0.321770  | 1.000000  | 1.000      |
| 588 REACTOME-BETA-CATENIN-INDEPENDENT-WNT-SIGNALING   | GO-0098660    | 9    | -0.394516 | -1.134350 | 0.302726  | 1.000000  | 1.000      |
| 589 GOBP-CALCIUM-ION-TRANSPORT-INTO-CYTOSOL           | R-RNO-3858494 | 5    | -0.493976 | -1.137589 | 0.287591  | 1.000000  | 1.000      |
| 590 GOBP-REGULATION-OF-VASCULATURE-DEVELOPMENT        | GO-0060402    | 7    | -0.438199 | -1.138242 | 0.293413  | 1.000000  | 1.000      |
| 591 GOBP-SENSORY-ORGAN-DEVELOPMENT                    | GO-1901342    | 5    | -0.493884 | -1.139157 | 0.303266  | 1.000000  | 1.000      |
| 592 REACTOME-RHO-GTPASE-EFFECTORS                     | GO-0007423    | 8    | -0.417031 | -1.139854 | 0.307359  | 1.000000  | 1.000      |
| 593 GOBP-CALCIUM-ION-TRANSMEMBRANE-TRANSPORT          | R-RNO-195258  | 9    | -0.404701 | -1.146367 | 0.271041  | 1.000000  | 1.000      |
| 594 GOBP-REGULATION-OF-POSTSYNAPSE-ORGANIZATION       | GO-0070588    | 7    | -0.438199 | -1.146976 | 0.296407  | 1.000000  | 1.000      |
| 595 GOBP-DENDRITE-MORPHOGENESIS                       | GO-0099175    | 6    | -0.457235 | -1.147920 | 0.295666  | 1.000000  | 1.000      |
| 596 GOBP-CYTOSOLIC-CALCIUM-ION-TRANSPORT              | GO-0048813    | 7    | -0.442763 | -1.149962 | 0.295154  | 1.000000  | 1.000      |
| 597 GOBP-MUSCLE-SYSTEM-PROCESS                        | GO-0060401    | 7    | -0.438199 | -1.150805 | 0.300310  | 1.000000  | 1.000      |
| 598 GOBP-REGULATION-OF-BODY-FLUID-LEVELS              | GO-0003012    | 9    | -0.405093 | -1.153083 | 0.287749  | 1.000000  | 1.000      |
| 599 GOBP-REGULATION-OF-BODY-FLUID-LEVELS              | GO-0050878    | 11   | -0.379200 | -1.156773 | 0.297965  | 1.000000  | 1.000      |

Continuation of Table S2

| NAME | ID                                                | SIZE | ES        | NES       | NOM.p.val | FDR.q.val | FWER.p.val |
|------|---------------------------------------------------|------|-----------|-----------|-----------|-----------|------------|
| 600  | GOBP-CENTRAL-NERVOUS-SYSTEM-DEVELOPMENT           | 27   | -0.301034 | -1.157940 | 0.303371  | 1.000000  | 1.000      |
| 601  | GOBP-CARBOHYDRATE-HOMEOSTASIS                     | 7    | -0.440064 | -1.162099 | 0.263868  | 1.000000  | 1.000      |
| 602  | REACTOME-G-ALPHA-Z-SIGNALING-EVENTS               | 5    | -0.493976 | -1.162235 | 0.267405  | 1.000000  | 1.000      |
| 603  | REACTOME-TRANSCRIPTIONAL-REGULATION-BY-TP53       | 6    | -0.470448 | -1.164079 | 0.276596  | 1.000000  | 1.000      |
| 604  | REACTOME-SIGNALING-BY-RHO-GTPASES-MIRO-GTPASES... | 9    | -0.404701 | -1.166495 | 0.264012  | 1.000000  | 1.000      |
| 605  | GOBP-CELL-CELL-SIGNALING-BY-WNT                   | 7    | -0.436764 | -1.168311 | 0.251841  | 1.000000  | 1.000      |
| 606  | GOBP-COAGULATION                                  | 8    | -0.423395 | -1.169896 | 0.279494  | 1.000000  | 1.000      |
| 607  | GOBP-RESPONSE-TO-WOUNDING                         | 15   | -0.349273 | -1.171171 | 0.272849  | 1.000000  | 1.000      |
| 608  | GOBP-ORGANOPHOSPHATE-BIOSYNTHETIC-PROCESS         | 5    | -0.505945 | -1.175941 | 0.258970  | 1.000000  | 1.000      |
| 609  | GOBP-REGULATION-OF-MUSCLE-SYSTEM-PROCESS          | 8    | -0.434877 | -1.175997 | 0.237313  | 1.000000  | 1.000      |
| 610  | REACTOME-PTEN-REGULATION                          | 5    | -0.506090 | -1.177432 | 0.254290  | 1.000000  | 1.000      |
| 611  | GOBP-REGULATION-OF-SYNAPTIC-PLASTICITY            | 21   | -0.325921 | -1.177620 | 0.282638  | 1.000000  | 1.000      |
| 612  | GOBP-SEXUAL-REPRODUCTION                          | 10   | -0.398252 | -1.179922 | 0.283804  | 1.000000  | 1.000      |
| 613  | GOBP-CELL-CELL-SIGNALING                          | 56   | -0.298321 | -1.183036 | 0.266586  | 1.000000  | 1.000      |
| 614  | GOBP-GROWTH                                       | 14   | -0.365982 | -1.183077 | 0.272727  | 1.000000  | 1.000      |
| 615  | GOBP-TRANSMEMBRANE-TRANSPORT                      | 27   | -0.309359 | -1.188971 | 0.259823  | 1.000000  | 1.000      |
| 616  | GOBP-REGULATION-OF-SYNAPTIC-TRANSMISSION-GLUTA... | 12   | -0.385135 | -1.190906 | 0.267568  | 1.000000  | 1.000      |
| 617  | GOBP-NUCLEOSIDE-PHOSPHATE-BIOSYNTHETIC-PROCESS    | 5    | -0.505945 | -1.192798 | 0.241538  | 1.000000  | 1.000      |
| 618  | REACTOME-FC-EPSILON-RECEPTOR-FCERL-SIGNALING      | 7    | -0.462802 | -1.197427 | 0.215152  | 1.000000  | 1.000      |
| 619  | REACTOME-G-ALPHA-Q-SIGNALING-EVENTS               | 6    | -0.477054 | -1.199992 | 0.234824  | 1.000000  | 1.000      |
| 620  | GOBP-REGULATION-OF-TRANS-SYNAPTIC-SIGNALING       | 40   | -0.293992 | -1.203099 | 0.240903  | 1.000000  | 1.000      |
| 621  | GOBP-DENDRITE-DEVELOPMENT                         | 10   | -0.403987 | -1.207640 | 0.218077  | 1.000000  | 1.000      |
| 622  | GOBP-CHROMOSOME-ORGANIZATION                      | 6    | -0.490371 | -1.210312 | 0.232456  | 1.000000  | 1.000      |
| 623  | GOBP-INNATE-IMMUNE-RESPONSE                       | 7    | -0.467437 | -1.215455 | 0.232170  | 1.000000  | 1.000      |
| 624  | GOBP-FC-EPSILON-RECEPTOR-SIGNALING-PATHWAY        | 7    | -0.462802 | -1.221193 | 0.243478  | 0.988504  | 1.000      |
| 625  | GOBP-NEGATIVE-REGULATION-OF-CELL-PROJECTION-OR... | 5    | -0.527500 | -1.223418 | 0.207317  | 0.989456  | 1.000      |
| 626  | GOBP-LOCOMOTORY-BEHAVIOR                          | 8    | -0.454188 | -1.225827 | 0.191176  | 0.989916  | 1.000      |
| 627  | REACTOME-TRAFFICKING-OF-GLUR2-CONTAINING-AMPA-... | 8    | -0.450000 | -1.227917 | 0.176642  | 0.991887  | 1.000      |
| 628  | GOBP-HEAD-DEVELOPMENT                             | 23   | -0.330315 | -1.227920 | 0.208333  | 1.000000  | 1.000      |
| 629  | GOBP-SIGNAL-RELEASE                               | 14   | -0.379726 | -1.236594 | 0.193681  | 0.977540  | 1.000      |
| 630  | GOBP-REGULATION-OF-SECRETION                      | 14   | -0.379856 | -1.240428 | 0.191432  | 0.972704  | 1.000      |
| 631  | GOBP-NEUROTRANSMITTER-SECRETION                   | 6    | -0.500000 | -1.241094 | 0.207831  | 0.980484  | 1.000      |
| 632  | GOBP-MALE-GAMETE-GENERATION                       | 5    | -0.542169 | -1.246496 | 0.203101  | 0.969499  | 1.000      |
| 633  | GOBP-CELLULAR-MACROMOLECULE-CATABOLIC-PROCESS     | 5    | -0.544343 | -1.252644 | 0.209231  | 0.955066  | 1.000      |
| 634  | GOBP-REGULATION-OF-CELL-CYCLE-PROCESS             | 5    | -0.550414 | -1.252782 | 0.206231  | 0.965091  | 1.000      |
| 635  | GOBP-CELLULAR-RESPONSE-TO-KETONE                  | 5    | -0.534818 | -1.255053 | 0.170404  | 0.966587  | 1.000      |
| 636  | GOBP-CHEMICAL-SYNAPTIC-TRANSMISSION-POSTSYNAPTIC  | 9    | -0.451440 | -1.267849 | 0.174962  | 0.924492  | 1.000      |
| 637  | GOBP-RESPONSE-TO-ALCOHOL                          | 11   | -0.423741 | -1.297619 | 0.173554  | 0.819952  | 1.000      |
| 638  | GOBP-CELL-CYCLE                                   | 21   | -0.352648 | -1.297864 | 0.158365  | 0.828658  | 1.000      |
| 639  | GOBP-CALCIUM-ION-TRANSPORT                        | 11   | -0.429318 | -1.299588 | 0.150000  | 0.835324  | 1.000      |
| 640  | GOBP-CELL-SURFACE-RECEPTOR-SIGNALING-PATHWAY-I... | 15   | -0.397237 | -1.300695 | 0.160265  | 0.837640  | 1.000      |
| 641  | GOBP-PROTEIN-LOCALIZATION-TO-ORGANELLE            | 8    | -0.471388 | -1.301144 | 0.167135  | 0.845867  | 1.000      |
| 642  | GOBP-MITOTIC-CELL-CYCLE                           | 10   | -0.447847 | -1.308137 | 0.156780  | 0.829737  | 1.000      |

Continuation of Table S2

| NAME                                                  | ID            | SIZE | ES        | NES       | NOM.p.val | FDR.q.val | FWER.p.val |
|-------------------------------------------------------|---------------|------|-----------|-----------|-----------|-----------|------------|
| 643 REACTOME-HEMOSTASIS                               | R-RNO-109582  | 14   | -0.403680 | -1.309821 | 0.156000  | 0.833214  | 1.000      |
| 644 REACTOME-CA-DEPENDENT-EVENTS                      | R-RNO-111996  | 8    | -0.475000 | -1.311256 | 0.165906  | 0.838129  | 1.000      |
| 645 GOBP-RESPONSE-TO-TUMOR-NECROSIS-FACTOR            | GO-0034612    | 7    | -0.497977 | -1.313266 | 0.152518  | 0.841031  | 1.000      |
| 646 GOBP-MAPK-CASCADE                                 | GO-0000165    | 18   | -0.379171 | -1.316737 | 0.141145  | 0.838148  | 1.000      |
| 647 REACTOME-SIGNALING-BY-WNT                         | R-RNO-195721  | 7    | -0.520046 | -1.320924 | 0.140719  | 0.831779  | 1.000      |
| 648 GOBP-NUCLEAR-TRANSPORT                            | GO-0051169    | 5    | -0.560217 | -1.323734 | 0.122807  | 0.831657  | 1.000      |
| 649 GOBP-MEMBRANE-ORGANIZATION                        | GO-0061024    | 12   | -0.420784 | -1.328571 | 0.151344  | 0.823309  | 1.000      |
| 650 GOBP-NEGATIVE-REGULATION-OF-TRANSFERASE-ACTIVITY  | GO-0051348    | 5    | -0.571128 | -1.330146 | 0.125937  | 0.827970  | 1.000      |
| 651 GOBP-ORGANIC-ACID-TRANSPORT                       | GO-0015849    | 7    | -0.503540 | -1.330361 | 0.141369  | 0.838356  | 1.000      |
| 652 GOBP-NEGATIVE-REGULATION-OF-KINASE-ACTIVITY       | GO-0033673    | 5    | -0.571128 | -1.331859 | 0.120980  | 0.843636  | 1.000      |
| 653 GOBP-SYNAPTIC-TRANSMISSION-GLUTAMATERGIC          | GO-0035249    | 13   | -0.418705 | -1.332131 | 0.160221  | 0.854343  | 1.000      |
| 654 GOBP-ORGANIC-ANION-TRANSPORT                      | GO-0015711    | 6    | -0.537694 | -1.334938 | 0.135053  | 0.854107  | 1.000      |
| 655 GOBP-METAL-ION-TRANSPORT                          | GO-0030001    | 11   | -0.429318 | -1.336007 | 0.148966  | 0.861508  | 1.000      |
| 656 GOBP-CARBOXYLIC-ACID-TRANSPORT                    | GO-0046942    | 6    | -0.537694 | -1.338010 | 0.131148  | 0.865587  | 1.000      |
| 657 REACTOME-CREB1-PHOSPHORYLATION-THROUGH-NMDA-RE... | R-RNO-442742  | 8    | -0.485388 | -1.341865 | 0.127566  | 0.862523  | 1.000      |
| 658 GOBP-PROTEIN-TETRAMERIZATION                      | GO-0051262    | 5    | -0.578313 | -1.342770 | 0.111635  | 0.871855  | 1.000      |
| 659 REACTOME-CELL-CYCLE-MITOTIC                       | R-RNO-69278   | 5    | -0.578650 | -1.343701 | 0.134441  | 0.881371  | 1.000      |
| 660 GOBP-POSTTRANSCRIPTIONAL-REGULATION-OF-GENE-EX... | GO-0010608    | 8    | -0.490146 | -1.344707 | 0.130435  | 0.890775  | 1.000      |
| 661 GOBP-AMINO-ACID-TRANSPORT                         | GO-0006865    | 6    | -0.537694 | -1.355343 | 0.102326  | 0.860527  | 1.000      |
| 662 GOBP-CELLULAR-GLUCOSE-HOMEOSTASIS                 | GO-0001678    | 5    | -0.592096 | -1.362074 | 0.115152  | 0.845778  | 1.000      |
| 663 GOBP-ESTABLISHMENT-OF-PROTEIN-LOCALIZATION-TO-... | GO-0072594    | 5    | -0.583592 | -1.368286 | 0.090352  | 0.833278  | 1.000      |
| 664 GOBP-PROTEIN-COMPLEX-OLIGOMERIZATION              | GO-0051259    | 7    | -0.530725 | -1.378353 | 0.127193  | 0.806843  | 1.000      |
| 665 GOBP-SECOND-MESSENGER-MEDIATED-SIGNALING          | GO-0019932    | 16   | -0.413385 | -1.381192 | 0.105820  | 0.808792  | 1.000      |
| 666 REACTOME-INTRACELLULAR-SIGNALING-BY-SECOND-MES... | R-RNO-9006925 | 15   | -0.417131 | -1.381440 | 0.111842  | 0.821499  | 1.000      |
| 667 REACTOME-G-PROTEIN-MEDIATED-EVENTS                | R-RNO-112040  | 13   | -0.442679 | -1.387292 | 0.100730  | 0.830294  | 1.000      |
| 668 GOBP-DIVALENT-INORGANIC-CATION-HOMEOSTASIS        | GO-0072507    | 9    | -0.481013 | -1.382837 | 0.114441  | 0.826272  | 1.000      |
| 669 GOBP-REGULATION-OF-ANION-TRANSPORT                | GO-0044070    | 20   | -0.386788 | -1.396394 | 0.100000  | 0.802443  | 1.000      |
| 670 GOBP-REGULATION-OF-CYTOSOLIC-CALCIUM-ION-CONCE... | GO-0051480    | 13   | -0.442679 | -1.400049 | 0.108871  | 0.800699  | 1.000      |
| 671 GOBP-PROTEIN-CONTAINING-COMPLEX-SUBUNIT-ORGANI... | GO-0043933    | 15   | -0.421908 | -1.401436 | 0.096317  | 0.810104  | 1.000      |
| 672 REACTOME-NEUREXINS-AND-NEUROLIGINS                | R-RNO-6794361 | 9    | -0.493462 | -1.402112 | 0.103448  | 0.822604  | 1.000      |
| 673 GOBP-METAL-ION-HOMEOSTASIS                        | GO-0055065    | 14   | -0.436559 | -1.406730 | 0.099329  | 0.819380  | 1.000      |
| 674 REACTOME-CELL-CYCLE                               | R-RNO-1640170 | 6    | -0.572810 | -1.408553 | 0.082171  | 0.827412  | 1.000      |
| 675 GOBP-EXCITATORY-CHEMICAL-SYNAPTIC-TRANSMISSION    | GO-0098976    | 5    | -0.599664 | -1.408622 | 0.104596  | 0.843729  | 1.000      |
| 676 GOBP-NEGATIVE-REGULATION-OF-MULTICELLULAR-ORGA... | GO-0051241    | 15   | -0.420879 | -1.409943 | 0.100271  | 0.854781  | 1.000      |
| 677 REACTOME-RAS-ACTIVATION-UPON-CA2-INFLUX-THROUG... | R-HSA-442982  | 6    | -0.573171 | -1.410257 | 0.094595  | 0.871169  | 1.000      |
| 678 GOBP-REGULATION-OF-SIGNALING-RECEPTOR-ACTIVITY    | GO-0010469    | 14   | -0.434362 | -1.420007 | 0.098274  | 0.846374  | 1.000      |
| 679 REACTOME-TRAFFICKING-OF-AMPA-RECEPTORS            | R-RNO-399719  | 11   | -0.467532 | -1.420179 | 0.079498  | 0.863845  | 1.000      |
| 680 REACTOME-CLASS-C-3-METABOTROPIC-GLUTAMATE-PHER... | R-RNO-420499  | 7    | -0.555922 | -1.426068 | 0.084746  | 0.855601  | 1.000      |
| 681 REACTOME-ASSEMBLY-AND-CELL-SURFACE-PRESENTATIO... | R-RNO-9609736 | 8    | -0.519388 | -1.430865 | 0.074561  | 0.854270  | 1.000      |
| 682 REACTOME-MAPK-FAMILY-SIGNALING-CASCADES           | R-RNO-5683057 | 12   | -0.459035 | -1.432120 | 0.070442  | 0.868940  | 1.000      |
| 683 GOBP-REGULATION-OF-CATION-CHANNEL-ACTIVITY        | R-RNO-2001257 | 14   | -0.434545 | -1.433049 | 0.083333  | 0.885145  | 1.000      |
| 684 REACTOME-GPCR-LIGAND-BINDING                      | R-RNO-500792  | 8    | -0.530619 | -1.437037 | 0.077037  | 0.880155  | 1.000      |
| 685 REACTOME-NEGATIVE-REGULATION-OF-NMDA-RECEPTOR-... | R-HSA-9617324 | 8    | -0.519388 | -1.440190 | 0.089443  | 0.895385  | 1.000      |

Continuation of Table S2

| NAME | ID                                                | SIZE | ES        | NES       | NOM.p.val | FDR.q.val | FWER.p.val |
|------|---------------------------------------------------|------|-----------|-----------|-----------|-----------|------------|
| 686  | GOBP-CHEMICAL-HOMEOSTASIS                         | 23   | -0.388955 | -1.444721 | 0.078844  | 0.896240  | 1.000      |
| 687  | GOBP-REGULATION_OF_CATION_TRANSMEMBRANE_TRANSPORT | 16   | -0.428081 | -1.460395 | 0.071146  | 0.843066  | 1.000      |
| 688  | REACTOME-ADAPTIVE-IMMUNE-SYSTEM                   | 9    | -0.509115 | -1.463810 | 0.068376  | 0.850692  | 1.000      |
| 689  | GOBP-CATION_TRANSMEMBRANE_TRANSPORT               | 18   | -0.425261 | -1.465961 | 0.058589  | 0.864340  | 1.000      |
| 690  | GOBP-ION-HOMEOSTASIS                              | 16   | -0.437862 | -1.473055 | 0.072776  | 0.854910  | 1.000      |
| 691  | GOBP-CELLULAR-COMPONENT-MAINTENANCE               | 5    | -0.627201 | -1.477436 | 0.055046  | 0.856431  | 1.000      |
| 692  | GOBP-SENSORY_PERCEPTION_OF_PAIN                   | 5    | -0.635554 | -1.487454 | 0.050671  | 0.832943  | 1.000      |
| 693  | GOBP-ENDOMEMBRANE-SYSTEM_ORGANIZATION             | 6    | -0.603065 | -1.493016 | 0.046990  | 0.831064  | 1.000      |
| 694  | GOBP-RESPONSE_TO_ETHANOL                          | 5    | -0.638554 | -1.494116 | 0.048601  | 0.852698  | 1.000      |
| 695  | GOBP-CELLULAR_ION_HOMEOSTASIS                     | 14   | -0.466689 | -1.521191 | 0.061026  | 0.750830  | 1.000      |
| 696  | REACTOME-INTEGRATION_OF_ENERGY_METABOLISM         | 5    | -0.661504 | -1.539973 | 0.045741  | 0.694127  | 1.000      |
| 697  | GOBP-REGULATION_OF_MEMBRANE_POTENTIAL             | 17   | -0.450870 | -1.544169 | 0.042497  | 0.700519  | 1.000      |
| 698  | GOBP-G-PROTEIN_COUPLED_GLUTAMATE_RECEPTOR_SIGN... | 8    | -0.582439 | -1.570704 | 0.026746  | 0.615723  | 1.000      |
| 699  | REACTOME-OPIOID_SIGNALING                         | 12   | -0.500000 | -1.571680 | 0.039945  | 0.636165  | 1.000      |
| 700  | GOBP-REGULATION_OF_NEUROTRANSMITTER_RECEPTOR_A... | 13   | -0.494573 | -1.577922 | 0.040166  | 0.635698  | 1.000      |
| 701  | GOBP-REGULATION_OF_POSTSYNAPTIC_MEMBRANE_POTEN... | 14   | -0.488935 | -1.592668 | 0.046113  | 0.606039  | 1.000      |
| 702  | REACTOME-LONG-TERM_POTENTIATION                   | 10   | -0.546232 | -1.608867 | 0.020576  | 0.567000  | 1.000      |
| 703  | GOBP-CELLULAR_HOMEOSTASIS                         | 18   | -0.455897 | -1.619541 | 0.035573  | 0.551034  | 1.000      |
| 704  | REACTOME-SYNAPTIC_ADHESION-LIKE-MOLECULES         | 9    | -0.573582 | -1.634053 | 0.029070  | 0.521470  | 1.000      |
| 705  | GOBP-REGULATION_OF_NMDA_RECEPTOR_ACTIVITY         | 10   | -0.581937 | -1.678013 | 0.011348  | 0.402719  | 1.000      |
| 706  | GOBP-ADENYLATE_CYCLASE-INHIBITING-G-PROTEIN_CO... | 5    | -0.723347 | -1.682956 | 0.015699  | 0.410429  | 1.000      |
| 707  | GOBP-REGULATION_OF_ION_TRANSPORT                  | 36   | -0.419160 | -1.686929 | 0.030265  | 0.420669  | 1.000      |
| 708  | GOBP-G-PROTEIN_COUPLED_RECEPTOR_SIGNALING_PATHWAY | 18   | -0.484188 | -1.705699 | 0.015831  | 0.388496  | 1.000      |
| 709  | REACTOME-PROTEIN-PROTEIN-INTERACTIONS-AT-SYNAPSES | 12   | -0.549302 | -1.712471 | 0.011299  | 0.392093  | 1.000      |
| 710  | GOBP-ADENYLATE_CYCLASE-MODULATING-G-PROTEIN_CO... | 11   | -0.567980 | -1.724652 | 0.014306  | 0.380440  | 1.000      |
| 711  | GOBP-NEGATIVE-REGULATION_OF_GENE_EXPRESSION       | 11   | -0.570191 | -1.742220 | 0.008511  | 0.357916  | 0.995      |
| 712  | REACTOME-ACTIVATION_OF_NMDA_RECEPTORS-AND-POST... | 16   | -0.512241 | -1.755589 | 0.011984  | 0.344880  | 0.993      |
| 713  | GOBP-ADENYLATE_CYCLASE-INHIBITING-G-PROTEIN_CO... | 9    | -0.614078 | -1.767819 | 0.007143  | 0.338171  | 0.992      |
| 714  | REACTOME-SIGNALING-BY-GPCR                        | 22   | -0.483142 | -1.772512 | 0.003916  | 0.355531  | 0.991      |
| 715  | REACTOME-UNBLOCKING_OF_NMDA_RECEPTORS-GLUTAMAT... | 12   | -0.570093 | -1.779374 | 0.011080  | 0.368191  | 0.986      |
| 716  | REACTOME-G-ALPHA_I-SIGNALING-EVENTS               | 18   | -0.515174 | -1.786708 | 0.010652  | 0.386627  | 0.979      |
| 717  | GOBP-CATION_TRANSPORT                             | 25   | -0.477040 | -1.795458 | 0.003876  | 0.404711  | 0.972      |
| 718  | GOBP-IONOTROPIC-GLUTAMATE_RECEPTOR_SIGNALING_P... | 9    | -0.625297 | -1.801502 | 0.008596  | 0.440991  | 0.966      |
| 719  | GOBP-CELL_CYCLE_PROCESS                           | 11   | -0.606056 | -1.874702 | 0.002729  | 0.267976  | 0.848      |
| 720  | REACTOME-NEUROTRANSMITTER_RECEPTORS-AND_POSTSY... | 22   | -0.510420 | -1.905832 | 0.003802  | 0.239683  | 0.748      |
| 721  | GOBP-SENSORY_PERCEPTION                           | 9    | -0.670886 | -1.909889 | 0.001422  | 0.289396  | 0.735      |
| 722  | REACTOME-TRANSMISSION-ACROSS-CHEMICAL-SYNAPSES    | 23   | -0.519574 | -1.920571 | 0.003856  | 0.325049  | 0.667      |
| 723  | REACTOME-NEURONAL-SYSTEM                          | 26   | -0.531507 | -2.014244 | 0.001255  | 0.211187  | 0.374      |
| 724  | GOBP-GLUTAMATE_RECEPTOR_SIGNALING_PATHWAY         | 17   | -0.646270 | -2.239019 | 0.000000  | 0.031969  | 0.036      |

End of Table

**Supplementary Table S3: SC rostral segment early (8 DPL peak) profile GSEA results.**

| Begin of Table S3 |                                                                        |               |      |          |          |           |           |            |  |
|-------------------|------------------------------------------------------------------------|---------------|------|----------|----------|-----------|-----------|------------|--|
|                   | NAME                                                                   | ID            | SIZE | ES       | NES      | NOM.p.val | FDR.q.val | FWER.p.val |  |
| 0                 | REACTOME_INTERLEUKIN_4_AND_INTERLEUKIN_13_SIGNALING                    | R-RNO-6785807 | 8    | 0.784993 | 2.518360 | 0.000000  | 0.021501  | 0.015      |  |
| 1                 | GOBP_NEGATIVE_REGULATION_OF_PEPTIDASE_ACTIVITY                         | GO-0010466    | 6    | 0.736709 | 2.130500 | 0.000000  | 0.257322  | 0.298      |  |
| 2                 | HALLMARK_TNFA_SIGNALING_VIA_NFKB                                       | M5890         | 14   | 0.459459 | 1.908470 | 0.004831  | 0.688131  | 0.748      |  |
| 3                 | GOBP_POSITIVE_REGULATION_OF_CELL_DIFFERENTIATION                       | GO-0045597    | 27   | 0.353574 | 1.854106 | 0.000000  | 0.684561  | 0.836      |  |
| 4                 | GOBP_RESPONSE_TO_ENDOGENOUS_STIMULUS                                   | GO-0009719    | 34   | 0.335154 | 1.838417 | 0.000000  | 0.588722  | 0.856      |  |
| 5                 | GOBP_NEGATIVE_REGULATION_OF_CYSTINE_TYPE_ENDOGENOUS_RESPONSE           | GO-2000117    | 5    | 0.699344 | 1.801695 | 0.016892  | 0.588662  | 0.902      |  |
| 6                 | GOBP_OSTEOCLAST_DIFFERENTIATION                                        | GO-0030316    | 6    | 0.622961 | 1.775699 | 0.013937  | 0.575180  | 0.930      |  |
| 7                 | GOBP_LEUKOCYTE_DIFFERENTIATION                                         | GO-0002521    | 15   | 0.410959 | 1.771396 | 0.021622  | 0.513138  | 0.935      |  |
| 8                 | GOBP_POSITIVE_REGULATION_OF_SMOOTH_MUSCLE_CELL_CONTRACTION             | GO-0048661    | 5    | 0.674699 | 1.761438 | 0.022801  | 0.479749  | 0.948      |  |
| 9                 | GOBP_CYTOKINE_MEDIATED_SIGNALING_PATHWAY                               | GO-0019221    | 16   | 0.402778 | 1.742551 | 0.000000  | 0.472665  | 0.961      |  |
| 10                | GOBP_OSTEOBLAST_DIFFERENTIATION                                        | GO-0001649    | 5    | 0.674699 | 1.720435 | 0.026578  | 0.478233  | 0.979      |  |
| 11                | GOBP_DEFENSE_RESPONSE                                                  | GO-0006952    | 19   | 0.376812 | 1.704846 | 0.012379  | 0.474040  | 0.984      |  |
| 12                | REACTOME_SIGNALING_BY_INTERLEUKINS                                     | R-RNO-449147  | 15   | 0.396585 | 1.683649 | 0.023474  | 0.484422  | 0.990      |  |
| 13                | GOBP_BLOOD_VESSEL_MORPHOGENESIS                                        | GO-0048514    | 14   | 0.405405 | 1.679468 | 0.021390  | 0.455829  | 0.991      |  |
| 14                | REACTOME_CYTOKINE_SIGNALING_IN_IMMUNE_SYSTEM                           | R-RNO-1280215 | 21   | 0.338604 | 1.648508 | 0.018405  | 0.495027  | 0.996      |  |
| 15                | GOBP_REGULATION_OF_CELL_DIFFERENTIATION                                | GO-0045595    | 32   | 0.300962 | 1.641018 | 0.000000  | 0.481683  | 0.998      |  |
| 16                | GOBP_POSITIVE_REGULATION_OF_DEVELOPMENTAL_PROCESS                      | GO-0051094    | 36   | 0.300962 | 1.635074 | 0.008264  | 0.468198  | 0.998      |  |
| 17                | GOBP_REGULATION_OF_HEMOPOIESIS                                         | GO-1903706    | 10   | 0.461538 | 1.626675 | 0.037975  | 0.459145  | 1.000      |  |
| 18                | GOBP_OSSIFICATION                                                      | GO-0001503    | 9    | 0.481444 | 1.623824 | 0.053571  | 0.439820  | 1.000      |  |
| 19                | GOBP_CELLULAR_RESPONSE_TO_NITROGEN_COMPOUND                            | GO-1901699    | 20   | 0.333804 | 1.595932 | 0.017857  | 0.476835  | 1.000      |  |
| 20                | GOBP_MYELOID_CELL_DIFFERENTIATION                                      | GO-0030099    | 13   | 0.400000 | 1.595797 | 0.051282  | 0.454274  | 1.000      |  |
| 21                | GOBP_ANATOMICAL_STRUCTURE_FORMATION_INVOLVED_IN_CELL_DEVELOPMENT       | GO-0048646    | 20   | 0.336803 | 1.587974 | 0.023952  | 0.449877  | 1.000      |  |
| 22                | GOBP_CELLULAR_RESPONSE_TO_PEPTIDE                                      | GO-1901653    | 13   | 0.386667 | 1.565440 | 0.035398  | 0.481665  | 1.000      |  |
| 23                | GOBP_PRL_MIRNA_TRANSCRIPTION_BY_RNA_POLYMERASE_II                      | GO-0061614    | 7    | 0.506173 | 1.561183 | 0.067568  | 0.470515  | 1.000      |  |
| 24                | GOBP_POSITIVE_REGULATION_OF_CYTOKINE_PRODUCTION                        | GO-0001819    | 7    | 0.506173 | 1.561106 | 0.045627  | 0.451695  | 1.000      |  |
| 25                | GOBP_NEGATIVE_REGULATION_OF_CELL_DEATH                                 | GO-0060548    | 22   | 0.318182 | 1.557852 | 0.013158  | 0.441954  | 1.000      |  |
| 26                | GOBP_REGULATION_OF_MYELOID_CELL_DIFFERENTIATION                        | GO-0045637    | 9    | 0.455696 | 1.555968 | 0.051724  | 0.429516  | 1.000      |  |
| 27                | GOBP_REGULATION_OF_LEUKOCYTE_DIFFERENTIATION                           | GO-1902105    | 9    | 0.455696 | 1.545615 | 0.029787  | 0.434428  | 1.000      |  |
| 28                | GOBP_POSITIVE_REGULATION_OF_PRL_MIRNA_TRANSCRIPTION                    | GO-1902895    | 7    | 0.506173 | 1.535649 | 0.054054  | 0.440023  | 1.000      |  |
| 29                | GOBP_MONONUCLEAR_CELL_DIFFERENTIATION                                  | GO-1903131    | 7    | 0.493827 | 1.520827 | 0.040161  | 0.455997  | 1.000      |  |
| 30                | GOBP_CELL_POPULATION_PROLIFERATION                                     | GO-0008283    | 32   | 0.265636 | 1.491342 | 0.042017  | 0.505450  | 1.000      |  |
| 31                | HALLMARK_ALLOGRAFT_REJECTION                                           | M5950         | 7    | 0.493827 | 1.488915 | 0.067857  | 0.495542  | 1.000      |  |
| 32                | GOBP_REGULATION_OF_OSTEOCLAST_DIFFERENTIATION                          | GO-0045670    | 5    | 0.564178 | 1.474750 | 0.083333  | 0.512239  | 1.000      |  |
| 33                | GOBP_REGULATION_OF_MYELOID_LEUKOCYTE_DIFFERENTIATION                   | GO-0002761    | 8    | 0.450000 | 1.466358 | 0.092308  | 0.516134  | 1.000      |  |
| 34                | GOBP_AMEBOIDAL_TYPE_CELL_MIGRATION                                     | GO-0001667    | 11   | 0.389610 | 1.464363 | 0.070423  | 0.505857  | 1.000      |  |
| 35                | GOBP_RAS_PROTEIN_SIGNAL_TRANSDUCTION                                   | GO-0007265    | 5    | 0.578313 | 1.460845 | 0.076923  | 0.490188  | 1.000      |  |
| 36                | GOBP_NEGATIVE_REGULATION_OF_CELL_POPULATION_PROLIFERATION              | GO-0008285    | 9    | 0.431277 | 1.460354 | 0.073684  | 0.487369  | 1.000      |  |
| 37                | GOBP_MYELOID_LEUKOCYTE_DIFFERENTIATION                                 | GO-0002573    | 11   | 0.389610 | 1.443364 | 0.074890  | 0.514811  | 1.000      |  |
| 38                | GOBP_CELLULAR_RESPONSE_TO_OXYGEN_CONTAINING_COMPOUND                   | GO-1901701    | 29   | 0.267083 | 1.424809 | 0.043103  | 0.541622  | 1.000      |  |
| 39                | REACTOME_TRANSCRIPTIONAL_REGULATION_OF_WHITE_ADIPOCYTE_DIFFERENTIATION | R-RNO-381340  | 6    | 0.500000 | 1.424755 | 0.073171  | 0.528197  | 1.000      |  |
| 40                | GOBP_RESPONSE_TO_MECHANICAL_STIMULUS                                   | GO-0009612    | 6    | 0.500000 | 1.417183 | 0.103679  | 0.532377  | 1.000      |  |



Continuation of Table S3

| NAME | ID                                                | SIZE | ES       | NES      | NOM.p.val | FDR.q.val | FWER.p.val |
|------|---------------------------------------------------|------|----------|----------|-----------|-----------|------------|
| 41   | GOBP-POSITIVE-REGULATION_OF_TRANSCRIPTION_BY_R... | 24   | 0.282914 | 1.412818 | 0.073826  | 0.530247  | 1.000      |
| 42   | GOBP-RESPONSE_TO_PEPTIDE                          | 18   | 0.309449 | 1.411098 | 0.089385  | 0.521702  | 1.000      |
| 43   | GOBP-RESPONSE_TO_CYTOKINE                         | 23   | 0.279196 | 1.404905 | 0.061728  | 0.523425  | 1.000      |
| 44   | REACTOME-DEATH-RECEPTOR-SIGNALING                 | 5    | 0.534155 | 1.403333 | 0.125000  | 0.515704  | 1.000      |
| 45   | GOBP-POSITIVE-REGULATION_OF_MULTICELLULAR_ORGA... | 32   | 0.251094 | 1.398258 | 0.076271  | 0.515165  | 1.000      |
| 46   | GOBP-POSITIVE-REGULATION_OF_NUCLEOBASE-CONTAIN... | 28   | 0.261989 | 1.383227 | 0.053846  | 0.538803  | 1.000      |
| 47   | GOBP-LEUKOCYTE-CELL-CELL-ADHESION                 | 6    | 0.500000 | 1.380752 | 0.099678  | 0.533505  | 1.000      |
| 48   | GOBP-CELLULAR-RESPONSE_TO_HORMONE-STIMULUS        | 11   | 0.376623 | 1.374529 | 0.106667  | 0.536641  | 1.000      |
| 49   | GOBP-IMMUNE-SYSTEM-DEVELOPMENT                    | 17   | 0.316293 | 1.369192 | 0.064103  | 0.538479  | 1.000      |
| 50   | GOBP-CYTOKINE-PRODUCTION                          | 10   | 0.384615 | 1.363603 | 0.093220  | 0.541880  | 1.000      |
| 51   | GOBP-NEGATIVE-REGULATION_OF_PROTEOLYSIS           | 8    | 0.416564 | 1.360107 | 0.109929  | 0.538666  | 1.000      |
| 52   | GOBP-INFLAMMATORY-RESPONSE                        | 12   | 0.355263 | 1.345273 | 0.146667  | 0.561388  | 1.000      |
| 53   | GOBP-POSITIVE-REGULATION_OF_GENE-EXPRESSION       | 16   | 0.308092 | 1.337342 | 0.080214  | 0.568983  | 1.000      |
| 54   | GOBP-POSITIVE-REGULATION_OF_BIOSYNTHETIC-PROCESS  | 27   | 0.247471 | 1.331844 | 0.084507  | 0.572267  | 1.000      |
| 55   | GOBP-POSITIVE-REGULATION_OF_MYELOID-CELL-DIFFE... | 7    | 0.444444 | 1.327102 | 0.118081  | 0.573523  | 1.000      |
| 56   | GOBP-POSITIVE-REGULATION_OF_HEMOPOIESIS           | 12   | 0.343374 | 1.325744 | 0.112613  | 0.557122  | 1.000      |
| 57   | GOBP-ANIMAL-ORGAN-MORPHOGENESIS                   | 9    | 0.379747 | 1.315879 | 0.124464  | 0.570732  | 1.000      |
| 58   | GOBP-TISSUE-MIGRATION                             | 8    | 0.418845 | 1.312738 | 0.170040  | 0.568363  | 1.000      |
| 59   | GOBP-CELLULAR-RESPONSE_TO_EXTRACELLULAR-STIMULUS  | 5    | 0.506880 | 1.307240 | 0.125828  | 0.572002  | 1.000      |
| 60   | HALLMARK-HYPOXIA                                  | 10   | 0.360491 | 1.305539 | 0.125561  | 0.566353  | 1.000      |
| 61   | GOBP-CELLULAR-RESPONSE_TO_EXTERNAL-STIMULUS       | 9    | 0.379747 | 1.285547 | 0.162500  | 0.605189  | 1.000      |
| 62   | GOBP-FAT-CELL-DIFFERENTIATION                     | 21   | 0.267349 | 1.284313 | 0.143713  | 0.598937  | 1.000      |
| 63   | GOBP-POSITIVE-REGULATION_OF_CELL-POPULATION.PR... | 5    | 0.506024 | 1.282164 | 0.165079  | 0.594726  | 1.000      |
| 64   | GOBP-REGULATION_OF_ANION-TRANSMEMBRANE-TRANSPORT  | 33   | 0.225391 | 1.267578 | 0.119266  | 0.612100  | 1.000      |
| 65   | GOBP-POSITIVE-REGULATION_OF_CELL-CELL-ADHESION    | 5    | 0.493976 | 1.271073 | 0.168498  | 0.612620  | 1.000      |
| 66   | GOBP-PROTEIN-PHOSPHORYLATION                      | 5    | 0.481928 | 1.246952 | 0.190789  | 0.655338  | 1.000      |
| 67   | GOBP-HOMEOSTASIS_OF_NUMBER-OF-CELLS               | 8    | 0.375000 | 1.242722 | 0.160338  | 0.656854  | 1.000      |
| 68   | GOBP-ENDOTHELIAL-CELL-PROLIFERATION               | 5    | 0.493976 | 1.242314 | 0.207792  | 0.648520  | 1.000      |
| 69   | GOBP-POSITIVE-REGULATION_OF_LEUKOCYTE-CELL-CEL... | 5    | 0.481928 | 1.241924 | 0.210000  | 0.640357  | 1.000      |
| 70   | GOBP-SKIN-DEVELOPMENT                             | 6    | 0.439024 | 1.240634 | 0.204620  | 0.635096  | 1.000      |
| 71   | GOBP-POSITIVE-REGULATION_OF_MYELOID-LEUKOCYTE-... | 8    | 0.375000 | 1.232408 | 0.192453  | 0.646238  | 1.000      |
| 72   | GOBP-ENDOTHELIAL-CELL-MIGRATION                   | 9    | 0.367088 | 1.231780 | 0.184874  | 0.638975  | 1.000      |
| 73   | GOBP-DEFENSE-RESPONSE_TO_OTHER-ORGANISM           | 21   | 0.255471 | 1.230069 | 0.168675  | 0.634345  | 1.000      |
| 74   | GOBP-CIRCULATORY-SYSTEM-DEVELOPMENT               | 5    | 0.481928 | 1.224121 | 0.215753  | 0.640098  | 1.000      |
| 75   | GOBP-REGULATION_OF_LYMPHOCYTE-ACTIVATION          | 31   | 0.222563 | 1.219608 | 0.156250  | 0.643005  | 1.000      |
| 76   | GOBP-REGULATION_OF_MULTICELLULAR-ORGANISMAL.DE... | 8    | 0.375000 | 1.213817 | 0.191571  | 0.649382  | 1.000      |
| 77   | GOBP-RESPONSE_TO_OXYGEN-LEVELS                    | 11   | 0.324675 | 1.211510 | 0.187192  | 0.647465  | 1.000      |
| 78   | GOBP-NEGATIVE-REGULATION_OF_NEURON-DEATH          | 8    | 0.375000 | 1.213817 | 0.191571  | 0.649382  | 1.000      |
| 79   | REACTOME-DAG-AND-IP3-SIGNALING                    | 8    | 0.362500 | 1.195847 | 0.219331  | 0.678175  | 1.000      |
| 80   | GOBP-PEPTIDYL-AMINO-ACID-MODIFICATION             | 22   | 0.242424 | 1.194104 | 0.191489  | 0.674729  | 1.000      |
| 81   | GOBP-EPIDERMIS-DEVELOPMENT                        | 5    | 0.457831 | 1.194013 | 0.227801  | 0.666829  | 1.000      |
| 82   | GOBP-BLOOD-VESSEL-ENDOTHELIAL-CELL-MIGRATION      | 8    | 0.375000 | 1.182722 | 0.240964  | 0.687024  | 1.000      |
| 83   | GOBP-NEUROTROPHIN-SIGNALING_PATHWAY               | 6    | 0.406856 | 1.173142 | 0.254902  | 0.706098  | 1.000      |

Continuation of Table S3

| NAME | ID                                                | SIZE | ES       | NES      | NOM.p.val | FDR.q.val | FWER.p.val |
|------|---------------------------------------------------|------|----------|----------|-----------|-----------|------------|
| 84   | GOBP-MAINTENANCE-OF-LOCATION                      | 7    | 0.370370 | 1.155704 | 0.235294  | 0.742957  | 1.000      |
| 85   | GOBP-NEUROTROPHIN_TRK_RECEPTOR-SIGNALING.PATHWAY  | 6    | 0.406856 | 1.150246 | 0.270833  | 0.749556  | 1.000      |
| 86   | GOBP-RESPONSE-TO-GROWTH-FACTOR                    | 18   | 0.252367 | 1.143544 | 0.245033  | 0.758093  | 1.000      |
| 87   | GOBP-PROTEIN-MODIFICATION-BY-SMALL-PROTEIN-CON... | 7    | 0.370370 | 1.137912 | 0.256917  | 0.765820  | 1.000      |
| 88   | GOBP-POSITIVE-REGULATION-OF-EPITHELIAL-CELL-PR... | 7    | 0.370370 | 1.137830 | 0.238636  | 0.757553  | 1.000      |
| 89   | GOBP-RESPONSE-TO-BIOTIC-STIMULUS                  | 17   | 0.260590 | 1.133773 | 0.245714  | 0.759584  | 1.000      |
| 90   | GOBP-RESPONSE-TO-INTERLEUKIN_1                    | 5    | 0.433735 | 1.132552 | 0.318493  | 0.754552  | 1.000      |
| 91   | GOBP-RESPONSE-TO-HORMONE                          | 20   | 0.234854 | 1.123023 | 0.266304  | 0.772827  | 1.000      |
| 92   | GOBP-ACTIN-FILAMENT-BASED-PROCESS                 | 7    | 0.362602 | 1.117692 | 0.286275  | 0.779794  | 1.000      |
| 93   | GOBP-PERIPHERAL-NERVOUS-SYSTEM-DEVELOPMENT        | 9    | 0.316456 | 1.115001 | 0.229885  | 0.778519  | 1.000      |
| 94   | GOBP-CELLULAR-RESPONSE-TO-ABIOTIC-STIMULUS        | 7    | 0.370370 | 1.114226 | 0.300752  | 0.772426  | 1.000      |
| 95   | GOBP-CELL-CELL-JUNCTION-ASSEMBLY                  | 5    | 0.433735 | 1.111734 | 0.291096  | 0.771955  | 1.000      |
| 96   | HALLMARK-KRAS-SIGNALING-UP                        | 6    | 0.378049 | 1.104313 | 0.300366  | 0.783924  | 1.000      |
| 97   | GOBP-NEGATIVE-REGULATION-OF-TRANSCRIPTION_BY-R... | 10   | 0.307692 | 1.103511 | 0.287611  | 0.778414  | 1.000      |
| 98   | GOBP-TUBE-MORPHOGENESIS                           | 15   | 0.264046 | 1.100737 | 0.322917  | 0.778284  | 1.000      |
| 99   | GOBP-REGULATION-OF-CELL-DEATH                     | 34   | 0.200167 | 1.098826 | 0.307018  | 0.775653  | 1.000      |
| 100  | GOBP-NEGATIVE-REGULATION-OF-PROTEIN-METABOLIC-... | 20   | 0.234273 | 1.095817 | 0.328859  | 0.776192  | 1.000      |
| 101  | GOBP-NERVE-DEVELOPMENT                            | 9    | 0.316456 | 1.083592 | 0.333333  | 0.802992  | 1.000      |
| 102  | GOBP-MEMBRANE-PROTEIN-PROTEOLYSIS                 | 6    | 0.376527 | 1.081807 | 0.356115  | 0.799513  | 1.000      |
| 103  | GOBP-POSITIVE-REGULATION-OF-CELLULAR-COMPONENT... | 9    | 0.316456 | 1.080978 | 0.313953  | 0.794155  | 1.000      |
| 104  | GOBP-EMBRYO-DEVELOPMENT-ENDING-IN-BIRTH-OR-EGG... | 9    | 0.310423 | 1.079028 | 0.333333  | 0.791668  | 1.000      |
| 105  | GOBP-INNATE-IMMUNE-RESPONSE                       | 7    | 0.358025 | 1.078314 | 0.373239  | 0.786562  | 1.000      |
| 106  | GOBP-RESPONSE-TO-EXTRACELLULAR-STIMULUS           | 13   | 0.257865 | 1.072498 | 0.356436  | 0.795439  | 1.000      |
| 107  | HALLMARK-APOPTOSIS                                | 6    | 0.378049 | 1.070394 | 0.336957  | 0.794524  | 1.000      |
| 108  | GOBP-SPROUTING-ANGIOGENESIS                       | 5    | 0.409639 | 1.070221 | 0.353147  | 0.787765  | 1.000      |
| 109  | GOBP-NEGATIVE-REGULATION-OF-MOLECULAR-FUNCTION    | 24   | 0.205784 | 1.063543 | 0.373418  | 0.798017  | 1.000      |
| 110  | GOBP-POSITIVE-REGULATION-OF-IMMUNE-SYSTEM-PROCESS | 18   | 0.228571 | 1.043406 | 0.407407  | 0.844361  | 1.000      |
| 111  | GOBP-PROTEOLYSIS                                  | 17   | 0.241463 | 1.042306 | 0.386740  | 0.839725  | 1.000      |
| 112  | GOBP-REGULATION-OF-EPITHELIAL-CELL-MIGRATION      | 6    | 0.365854 | 1.038968 | 0.359589  | 0.842330  | 1.000      |
| 113  | GOBP-CELL-JUNCTION-ASSEMBLY                       | 8    | 0.312500 | 1.034395 | 0.377510  | 0.847999  | 1.000      |
| 114  | GOBP-LIPID-BIOSYNTHETIC-PROCESS                   | 6    | 0.365854 | 1.033883 | 0.430034  | 0.842132  | 1.000      |
| 115  | GOBP-POSITIVE-REGULATION-OF-ENDOTHELIAL-CELL-P... | 6    | 0.365854 | 1.032511 | 0.362595  | 0.838798  | 1.000      |
| 116  | GOBP-REGULATION-OF-LIPID-BIOSYNTHETIC-PROCESS     | 6    | 0.365854 | 1.032212 | 0.391608  | 0.832297  | 1.000      |
| 117  | GOBP-ACTIVATION-OF-IMMUNE-RESPONSE                | 5    | 0.392890 | 1.026945 | 0.431095  | 0.839562  | 1.000      |
| 118  | GOBP-REGULATION-OF-PEPTIDYL-SERINE-PHOSPHORYLA... | 8    | 0.312500 | 1.026524 | 0.409420  | 0.833669  | 1.000      |
| 119  | GOBP-LIPID-METABOLIC-PROCESS                      | 10   | 0.294872 | 1.024577 | 0.375546  | 0.832026  | 1.000      |
| 120  | GOBP-REGULATION-OF-FAT-CELL-DIFFERENTIATION       | 6    | 0.373094 | 1.024209 | 0.394366  | 0.825967  | 1.000      |
| 121  | GOBP-RESPONSE-TO-DRUG                             | 11   | 0.272727 | 1.024064 | 0.412281  | 0.819641  | 1.000      |
| 122  | REACTOME-INTERFERON-SIGNALING                     | 6    | 0.353659 | 1.019389 | 0.449477  | 0.826180  | 1.000      |
| 123  | GOBP-PROTEIN-MODIFICATION-BY-SMALL-PROTEIN-CON... | 6    | 0.365854 | 1.019260 | 0.433566  | 0.819832  | 1.000      |
| 124  | GOBP-POSITIVE-REGULATION-OF-AXONOGENESIS          | 5    | 0.401522 | 1.016773 | 0.409375  | 0.819567  | 1.000      |
| 125  | GOBP-REGULATION-OF-LIPID-METABOLIC-PROCESS        | 7    | 0.333333 | 1.016174 | 0.396364  | 0.814257  | 1.000      |
| 126  | GOBP-IN-UTERO-EMBRYONIC-DEVELOPMENT               | 8    | 0.323991 | 1.015139 | 0.419913  | 0.810562  | 1.000      |

Continuation of Table S3

| NAME | ID                                                | SIZE | ES       | NES      | NOM.p.val | FDR.q.val | FWER.p.val |
|------|---------------------------------------------------|------|----------|----------|-----------|-----------|------------|
| 127  | GOBP-TRANSMEMBRANE.RECEPTOR.PROTEIN.SERINE.THR... | 6    | 0.365854 | 1.009609 | 0.439024  | 0.817176  | 1.000      |
| 128  | GOBP-POSITIVE.REGULATION.OF.PEPTIDYL.SERINE.PH... | 8    | 0.312500 | 1.005618 | 0.441509  | 0.821200  | 1.000      |
| 129  | GOBP-PROTEIN.KINASE.B.SIGNALING                   | 6    | 0.365854 | 1.005044 | 0.414966  | 0.816132  | 1.000      |
| 130  | GOBP-NEUROINFLAMMATORY.RESPONSE                   | 5    | 0.385542 | 1.002477 | 0.460481  | 0.816751  | 1.000      |
| 131  | GOBP-REGULATION.OF.DEFENSE.RESPONSE               | 7    | 0.333333 | 0.998121 | 0.393939  | 0.821904  | 1.000      |
| 132  | GOBP-VASCULATURE.DEVELOPMENT                      | 17   | 0.225352 | 0.994420 | 0.434066  | 0.825485  | 1.000      |
| 133  | GOBP-NEGATIVE.REGULATION.OF.NEURON.APOPTOTIC.P... | 8    | 0.312500 | 0.993219 | 0.421456  | 0.822188  | 1.000      |
| 134  | GOBP-REGULATION.OF.INFLAMMATORY.RESPONSE          | 7    | 0.333333 | 0.988091 | 0.438931  | 0.828629  | 1.000      |
| 135  | GOBP-EMBRYO.DEVELOPMENT                           | 14   | 0.232034 | 0.974494 | 0.463918  | 0.857637  | 1.000      |
| 136  | GOBP-NEURON.APOPTOTIC.PROCESS                     | 12   | 0.252780 | 0.971368 | 0.440191  | 0.859370  | 1.000      |
| 137  | REACTOME.SIGNALING.BY.RECEPTOR.TYROSINE.KINASES   | 26   | 0.193548 | 0.965053 | 0.532787  | 0.869320  | 1.000      |
| 138  | GOBP-ANION-TRANSMEMBRANE-TRANSPORT                | 7    | 0.320988 | 0.965035 | 0.473485  | 0.863223  | 1.000      |
| 139  | GOBP-REGULATION.OF.PROTEIN.CATABOLIC.PROCESS      | 7    | 0.316559 | 0.964800 | 0.482490  | 0.857961  | 1.000      |
| 140  | GOBP-PROTEIN.AUTOPHOSPHORYLATION                  | 5    | 0.327568 | 0.953968 | 0.477273  | 0.879314  | 1.000      |
| 141  | GOBP-INTRINSIC.APOPTOTIC.SIGNALING.PATHWAY        | 5    | 0.361446 | 0.950899 | 0.521127  | 0.880277  | 1.000      |
| 142  | GOBP-POSITIVE.REGULATION.OF.SMALL-MOLECULE.MET... | 5    | 0.361446 | 0.944578 | 0.490066  | 0.888962  | 1.000      |
| 143  | GOBP-EMBRYONIC.ORGAN.DEVELOPMENT                  | 7    | 0.306738 | 0.943732 | 0.516484  | 0.885192  | 1.000      |
| 144  | GOBP-RESPONSE.TO.NERVE.GROWTH-FACTOR              | 7    | 0.308642 | 0.939577 | 0.482759  | 0.890515  | 1.000      |
| 145  | GOBP-MORPHOGENESIS.OF-AN.EPITHELIUM               | 6    | 0.339022 | 0.938117 | 0.534546  | 0.887964  | 1.000      |
| 146  | GOBP-NEGATIVE.REGULATION.OF.PROTEIN.CATABOLIC.... | 5    | 0.360499 | 0.937439 | 0.519573  | 0.883901  | 1.000      |
| 147  | GOBP-POSITIVE.REGULATION.OF.LONG-TERM.SYNAPTIC... | 5    | 0.385542 | 0.937122 | 0.477663  | 0.878737  | 1.000      |
| 148  | GOBP-POSITIVE.REGULATION.OF.PHOSPHATIDYLINOSIT... | 5    | 0.361446 | 0.936824 | 0.526667  | 0.873723  | 1.000      |
| 149  | GOBP-REGULATION.OF.MITOTIC.CELL.CYCLE             | 5    | 0.361446 | 0.932008 | 0.514469  | 0.878739  | 1.000      |
| 150  | GOBP-CHROMATIN.ORGANIZATION                       | 5    | 0.361446 | 0.924508 | 0.513793  | 0.891461  | 1.000      |
| 151  | GOBP-POSITIVE.REGULATION.OF.EPITHELIAL-CELL.MI... | 5    | 0.361446 | 0.923452 | 0.562091  | 0.888111  | 1.000      |
| 152  | GOBP-NEGATIVE.REGULATION.OF.APOPTOTIC-SIGNALIN... | 7    | 0.308642 | 0.922864 | 0.540540  | 0.883827  | 1.000      |
| 153  | GOBP-RESPONSE.TO.UV                               | 5    | 0.361446 | 0.922388 | 0.539216  | 0.878943  | 1.000      |
| 154  | GOBP-PROTEIN.CATABOLIC.PROCESS                    | 8    | 0.275000 | 0.919328 | 0.544444  | 0.879721  | 1.000      |
| 155  | GOBP-REGULATION.OF.AXONOGENESIS                   | 7    | 0.308642 | 0.917311 | 0.567164  | 0.878771  | 1.000      |
| 156  | GOBP-RESPONSE.TO.LIPID                            | 19   | 0.194570 | 0.912739 | 0.655405  | 0.883259  | 1.000      |
| 157  | GOBP-EPITHELIAL-CELL.PROLIFERATION                | 12   | 0.240703 | 0.910004 | 0.537118  | 0.884419  | 1.000      |
| 158  | GOBP-REGULATION.OF.ENDOTHELIAL-CELL.MIGRATION     | 5    | 0.361446 | 0.907882 | 0.578778  | 0.884174  | 1.000      |
| 159  | GOBP-NEGATIVE.REGULATION.OF.CATALYTIC-ACTIVITY    | 17   | 0.197183 | 0.906013 | 0.603352  | 0.882979  | 1.000      |
| 160  | GOBP-POSITIVE.REGULATION.OF.DEVELOPMENTAL-GROWTH  | 8    | 0.289397 | 0.903093 | 0.547085  | 0.884324  | 1.000      |
| 161  | GOBP-INOSITOL.LIPID-MEDIATED.SIGNALING            | 8    | 0.280327 | 0.894555 | 0.614407  | 0.898875  | 1.000      |
| 162  | GOBP-POSITIVE.REGULATION.OF-CELL.PROJECTION.OR... | 10   | 0.243590 | 0.891642 | 0.622407  | 0.900556  | 1.000      |
| 163  | GOBP-NEGATIVE.REGULATION.OF.CATABOLIC.PROCESS     | 8    | 0.275000 | 0.887684 | 0.598485  | 0.904326  | 1.000      |
| 164  | GOBP-REGULATION.OF-CELL-PROJECTIONS               | 6    | 0.308642 | 0.886693 | 0.620438  | 0.900842  | 1.000      |
| 165  | GOBP-ORGAN.GROWTH                                 | 5    | 0.344442 | 0.873389 | 0.593443  | 0.921439  | 1.000      |
| 166  | GOBP-CELLULAR-RESPONSE.TO-ORGANIC-CYCLIC-COMPOUND | 13   | 0.221033 | 0.873040 | 0.609524  | 0.921276  | 1.000      |
| 167  | GOBP-TAXIS                                        | 14   | 0.216216 | 0.869511 | 0.616580  | 0.923763  | 1.000      |
| 168  | GOBP-REGULATION.OF.NEURON-DIFFERENTIATION         | 5    | 0.330682 | 0.865395 | 0.639498  | 0.927348  | 1.000      |
| 169  | GOBP-REGULATION.OF-ORGAN.GROWTH                   | 5    | 0.344442 | 0.864631 | 0.610738  | 0.923899  | 1.000      |

Continuation of Table S3

| NAME | ID                                                | SIZE | ES       | NES      | NOM.p.val | FDR.q.val | FWER.p.val |
|------|---------------------------------------------------|------|----------|----------|-----------|-----------|------------|
| 170  | GOBP-POSITIVE-REGULATION_OF_DEFENSE-RESPONSE      | 5    | 0.325301 | 0.863089 | 0.618557  | 0.921913  | 1.000      |
| 171  | GOBP-PEPTIDYL-TYROSINE-MODIFICATION               | 10   | 0.243590 | 0.856718 | 0.681159  | 0.930263  | 1.000      |
| 172  | GOBP-RESPONSE-TO-NUTRIENT                         | 5    | 0.326175 | 0.851056 | 0.634304  | 0.937139  | 1.000      |
| 173  | GOBP-NEGATIVE-REGULATION_OF_LIPID-METABOLIC-PR... | 5    | 0.325301 | 0.847292 | 0.648387  | 0.940458  | 1.000      |
| 174  | GOBP-REGULATION-OF-LIPASE-ACTIVITY                | 6    | 0.304877 | 0.846746 | 0.646643  | 0.936306  | 1.000      |
| 175  | GOBP-T-CELL-ACTIVATION                            | 8    | 0.259647 | 0.844126 | 0.646586  | 0.937171  | 1.000      |
| 176  | GOBP-MULTI-MULTICELLULAR-ORGANISM-PROCESS         | 8    | 0.258645 | 0.841847 | 0.665272  | 0.937014  | 1.000      |
| 177  | GOBP-POSITIVE-REGULATION_OF_TRANSMEMBRANE-TRAN... | 7    | 0.279034 | 0.839617 | 0.653226  | 0.935960  | 1.000      |
| 178  | GOBP-NEGATIVE-REGULATION_OF_PHOSPHORYLATION       | 7    | 0.283951 | 0.838554 | 0.681992  | 0.932837  | 1.000      |
| 179  | GOBP-IMMUNE-RESPONSE-REGULATING-SIGNALING-PATHWAY | 8    | 0.258109 | 0.834987 | 0.677656  | 0.934908  | 1.000      |
| 180  | REACTOME-CELLULAR-SENESCENCE                      | 6    | 0.292310 | 0.831575 | 0.680000  | 0.936837  | 1.000      |
| 181  | GOBP-RESPONSE-TO-BACTERIUM                        | 13   | 0.213333 | 0.826976 | 0.732394  | 0.941478  | 1.000      |
| 182  | GOBP-CARDIAC-MUSCLE-TISSUE-DEVELOPMENT            | 6    | 0.290025 | 0.822716 | 0.696864  | 0.944831  | 1.000      |
| 183  | GOBP-NEGATIVE-REGULATION_OF_IMMUNE-SYSTEM-PROCESS | 5    | 0.325301 | 0.821208 | 0.654804  | 0.942627  | 1.000      |
| 184  | GOBP-RESPONSE-TO-MOLECULE-OF-BACTERIAL-ORIGIN     | 13   | 0.213333 | 0.820523 | 0.713568  | 0.938834  | 1.000      |
| 185  | GOBP-REGULATION_OF_DEVELOPMENTAL-GROWTH           | 9    | 0.238398 | 0.817479 | 0.705628  | 0.939867  | 1.000      |
| 186  | GOBP-FC-RECEPTOR-SIGNALING-PATHWAY                | 8    | 0.258109 | 0.816242 | 0.697417  | 0.937375  | 1.000      |
| 187  | GOBP-HEART-DEVELOPMENT                            | 6    | 0.290025 | 0.812509 | 0.683453  | 0.940164  | 1.000      |
| 188  | GOBP-POSITIVE-REGULATION_OF_PEPTIDYL-TYROSINE-... | 8    | 0.247860 | 0.811331 | 0.710317  | 0.937216  | 1.000      |
| 189  | GOBP-PEPTIDYL-SERINE-MODIFICATION                 | 12   | 0.210526 | 0.802020 | 0.772926  | 0.950699  | 1.000      |
| 190  | REACTOME-DISEASES-OF-SIGNAL-TRANSDUCTION-BY-GR... | 12   | 0.210526 | 0.801492 | 0.744186  | 0.946708  | 1.000      |
| 191  | GOBP-LOCOMOTION                                   | 31   | 0.141032 | 0.800225 | 0.725000  | 0.943952  | 1.000      |
| 192  | REACTOME-SENESCENCE-ASSOCIATED-SECRETORY-PHENO... | 6    | 0.292310 | 0.799141 | 0.732143  | 0.941095  | 1.000      |
| 193  | GOBP-CARBOHYDRATE-DERIVATIVE-METABOLIC-PROCESS    | 8    | 0.247846 | 0.798453 | 0.726531  | 0.937532  | 1.000      |
| 194  | GOBP-POSITIVE-REGULATION_OF_BINDING               | 6    | 0.280488 | 0.797442 | 0.665480  | 0.934412  | 1.000      |
| 195  | GOBP-EPITHELIAL-CELL-DIFFERENTIATION              | 7    | 0.259573 | 0.797056 | 0.704280  | 0.930468  | 1.000      |
| 196  | GOBP-POSITIVE-REGULATION_OF_CELL-DEVELOPMENT      | 12   | 0.203559 | 0.793231 | 0.719626  | 0.932833  | 1.000      |
| 197  | GOBP-REGULATION-OF-CELL-CELL-ADHESION             | 9    | 0.229812 | 0.790152 | 0.750000  | 0.933940  | 1.000      |
| 198  | GOBP-POSITIVE-REGULATION_OF_NEUROGENESIS          | 12   | 0.203559 | 0.787728 | 0.815385  | 0.933471  | 1.000      |
| 199  | HALLMARK-EPITHELIAL-MESENCHYMAL-TRANSITION        | 5    | 0.301205 | 0.785078 | 0.773026  | 0.933847  | 1.000      |
| 200  | GOBP-POSITIVE-REGULATION_OF_NERVOUS-SYSTEM-DEV... | 12   | 0.203559 | 0.784173 | 0.764103  | 0.930806  | 1.000      |
| 201  | GOBP-POSITIVE-REGULATION_OF_LIPASE-ACTIVITY       | 5    | 0.301205 | 0.781320 | 0.739583  | 0.931049  | 1.000      |
| 202  | GOBP-POSITIVE-REGULATION_OF_NEURON-PROJECTION...  | 5    | 0.301205 | 0.779435 | 0.733766  | 0.930320  | 1.000      |
| 203  | GOBP-NEGATIVE-REGULATION_OF_HYDROLASE-ACTIVITY    | 11   | 0.212303 | 0.777924 | 0.787330  | 0.928315  | 1.000      |
| 204  | GOBP-CELLULAR-RESPONSE-TO-INORGANIC-SUBSTANCE     | 11   | 0.207792 | 0.776903 | 0.786364  | 0.925378  | 1.000      |
| 205  | GOBP-REGULATION-OF-CELL-SIZE                      | 5    | 0.301205 | 0.770335 | 0.718654  | 0.932304  | 1.000      |
| 206  | GOBP-REGULATION-OF-RESPONSE-TO-EXTERNAL-STIMULUS  | 15   | 0.178082 | 0.763231 | 0.821429  | 0.939228  | 1.000      |
| 207  | GOBP-DEVELOPMENTAL-CELL-GROWTH                    | 5    | 0.301205 | 0.763197 | 0.784195  | 0.934776  | 1.000      |
| 208  | GOBP-NEGATIVE-REGULATION_OF_BIOSYNTHETIC-PROCESS  | 13   | 0.185892 | 0.759040 | 0.781915  | 0.937079  | 1.000      |
| 209  | REACTOME-NGF-STIMULATED-TRANSCRIPTION             | 9    | 0.222405 | 0.749540 | 0.809524  | 0.948400  | 1.000      |
| 210  | GOBP-REGULATION-OF-PROTEIN-STABILITY              | 5    | 0.280063 | 0.749381 | 0.784722  | 0.944166  | 1.000      |
| 211  | GOBP-PHAGOCYTOSIS                                 | 5    | 0.279304 | 0.748049 | 0.794212  | 0.941721  | 1.000      |
| 212  | GOBP-POSITIVE-REGULATION_OF_GROWTH                | 9    | 0.227577 | 0.746238 | 0.809917  | 0.940095  | 1.000      |

Continuation of Table S3

| NAME                                                   | ID            | SIZE | ES        | NES       | NOM.p.val | FDR.q.val | FWER.p.val |
|--------------------------------------------------------|---------------|------|-----------|-----------|-----------|-----------|------------|
| 213 GOBP-RESPONSE.TO.OXYGEN.CONTAINING.COMPOUND        | GO:1901700    | 39   | 0.124374  | 0.739523  | 0.870690  | 0.946161  | 1.000      |
| 214 GOBP-REGULATION.OF.PHOSPHOLIPASE.C.ACTIVITY        | GO:1900274    | 5    | 0.301205  | 0.738510  | 0.760656  | 0.943378  | 1.000      |
| 215 REACTOME.DEVELOPMENTAL.BIOLOGY                     | R-RNO-1266738 | 22   | 0.149855  | 0.731267  | 0.844595  | 0.949794  | 1.000      |
| 216 GOBP-AXON.DEVELOPMENT                              | GO:0061564    | 18   | 0.161514  | 0.721685  | 0.921466  | 0.959240  | 1.000      |
| 217 GOBP-REGULATION.OF.DNA.BINDING.TRANSSCRIPTION.F... | GO:0051090    | 16   | 0.165910  | 0.721324  | 0.854651  | 0.955211  | 1.000      |
| 218 GOBP-CELL-CELL.JUNCTION.ORGANIZATION               | GO:0045216    | 6    | 0.256097  | 0.720020  | 0.841060  | 0.952751  | 1.000      |
| 219 GOBP-TISSUE.MORPHOGENESIS                          | GO:0048729    | 7    | 0.234323  | 0.719031  | 0.833333  | 0.949867  | 1.000      |
| 220 GOBP-CELLULAR.RESPONSE.TO.STARVATION               | GO:0009267    | 5    | 0.275483  | 0.715769  | 0.827119  | 0.949851  | 1.000      |
| 221 GOBP-ORGANONITROGEN.COMPOUND.CATABOLIC.PROCESS     | GO:1901565    | 10   | 0.199702  | 0.709744  | 0.844156  | 0.953560  | 1.000      |
| 222 GOBP-NEURON.PROJECTION.GUIDANCE                    | GO:0097485    | 9    | 0.202532  | 0.701773  | 0.892857  | 0.959841  | 1.000      |
| 223 GOBP-RESPONSE.TO.STARVATION                        | GO:0042594    | 5    | 0.275483  | 0.695740  | 0.840278  | 0.963060  | 1.000      |
| 224 GOBP-REPRODUCTIVE.SYSTEM.DEVELOPMENT               | GO:0061458    | 6    | 0.242811  | 0.695259  | 0.894340  | 0.959418  | 1.000      |
| 225 GOBP-DEVELOPMENTAL.GROWTH                          | GO:0048589    | 10   | 0.187504  | 0.689377  | 0.907080  | 0.962404  | 1.000      |
| 226 GOBP-CELLULAR.RESPONSE.TO.MOLECULE.OF.BACTERIA...  | GO:0071219    | 8    | 0.213298  | 0.686701  | 0.891566  | 0.961310  | 1.000      |
| 227 GOBP-CELLULAR.RESPONSE.TO.BIOTIC.STIMULUS          | GO:0071216    | 8    | 0.213298  | 0.686408  | 0.893939  | 0.957451  | 1.000      |
| 228 GOBP-REGULATION.OF.IMMUNE.SYSTEM.PROCESS           | GO:0002682    | 21   | 0.144975  | 0.685642  | 0.913333  | 0.954190  | 1.000      |
| 229 GOBP-POSITIVE.REGULATION.OF.IMMUNE.RESPONSE        | GO:0050778    | 9    | 0.202532  | 0.684082  | 0.887931  | 0.952005  | 1.000      |
| 230 GOBP-POSITIVE.REGULATION.OF.RESPONSE.TO.EXTERN...  | GO:0032103    | 9    | 0.202532  | 0.682362  | 0.864407  | 0.950325  | 1.000      |
| 231 GOBP-GLAND.DEVELOPMENT                             | GO:0048732    | 7    | 0.229132  | 0.680928  | 0.887641  | 0.947834  | 1.000      |
| 232 GOBP-NEURON.DEATH                                  | GO:0070997    | 18   | 0.145466  | 0.671866  | 0.913793  | 0.954052  | 1.000      |
| 233 GOBP-RESPONSE.TO.ORGANIC.CYCLIC.COMPOUND           | GO:0014070    | 20   | 0.144374  | 0.668537  | 0.944099  | 0.953708  | 1.000      |
| 234 REACTOME.POST.TRANSLATIONAL.PROTEIN.MODIFICATION   | R-RNO-597592  | 7    | 0.222929  | 0.664100  | 0.914286  | 0.954125  | 1.000      |
| 235 GOBP-POSITIVE.REGULATION.OF.CATION.TRANSMEMBR...   | GO:1904064    | 5    | 0.266763  | 0.663717  | 0.898246  | 0.950521  | 1.000      |
| 236 GOBP-RESPONSE.TO.CADMIUM.ION                       | GO:0046686    | 6    | 0.236588  | 0.660065  | 0.887789  | 0.949980  | 1.000      |
| 237 GOBP-GLIOGENESIS                                   | GO:0042063    | 12   | 0.172702  | 0.656612  | 0.955285  | 0.949652  | 1.000      |
| 238 GOBP-RESPONSE.TO.OXIDATIVE.STRESS                  | GO:0006979    | 8    | 0.200000  | 0.644542  | 0.911894  | 0.956871  | 1.000      |
| 239 REACTOME.EXTRACELLULAR.MATRIX.ORGANIZATION         | R-RNO-1474244 | 5    | 0.253012  | 0.643903  | 0.914591  | 0.953475  | 1.000      |
| 240 GOBP-EXTRINSIC.APOPTOTIC.SIGNALING.PATHWAY         | GO:0097191    | 7    | 0.213948  | 0.632606  | 0.914498  | 0.959308  | 1.000      |
| 241 GOBP-RESPONSE.TO.REACTIVE.OXYGEN.SPECIES           | GO:0000302    | 8    | 0.200000  | 0.631614  | 0.932075  | 0.956010  | 1.000      |
| 242 HALLMARK.UV.RESPONSE.UP                            | M5941         | 5    | 0.228916  | 0.598158  | 0.954693  | 0.975470  | 1.000      |
| 243 REACTOME.INFECTIOUS.DISEASE                        | R-HSA-5663205 | 12   | 0.149135  | 0.566231  | 0.972973  | 0.988075  | 1.000      |
| 244 GOBP-NEGATIVE.REGULATION.OF.TRANSMEMBRANE.TRAN...  | GO:0034763    | 6    | 0.195147  | 0.548072  | 0.977273  | 0.991367  | 1.000      |
| 245 GOBP-TISSUE.HOMEOSTASIS                            | GO:0001894    | 5    | 0.204819  | 0.536539  | 0.973077  | 0.990628  | 1.000      |
| 246 GOBP-ERBB.SIGNALING.PATHWAY                        | GO:0038127    | 5    | 0.192771  | 0.507811  | 0.990099  | 0.993334  | 1.000      |
| 247 GOBP-POSITIVE.REGULATION.OF.CELLULAR.COMPONENT...  | GO:0051130    | 24   | -0.109107 | -0.384918 | 0.996499  | 0.999159  | 1.000      |
| 248 GOBP-RESPONSE.TO.NITROGEN.COMPOUND                 | GO:1901698    | 35   | -0.114099 | -0.425075 | 0.996652  | 0.999031  | 1.000      |
| 249 GOBP-REGULATION.OF.CELLULAR.COMPONENT.SIZE         | GO:0032535    | 7    | -0.184156 | -0.473932 | 0.991968  | 0.994017  | 1.000      |
| 250 REACTOME.ESTROGEN.DEPENDENT.NUCLEAR.EVENTS.DOW...  | R-RNO-9634638 | 5    | -0.216867 | -0.483219 | 0.986130  | 0.993909  | 1.000      |
| 251 GOBP-REGIONALIZATION                               | GO:0003002    | 6    | -0.205458 | -0.491284 | 0.988935  | 0.993932  | 1.000      |
| 252 GOBP-REGULATION.OF.IMMUNE.RESPONSE                 | GO:0050776    | 12   | -0.161627 | -0.491716 | 0.980892  | 0.995929  | 1.000      |
| 253 GOBP-PATTERN.SPECIFICATION.PROCESS                 | GO:0007389    | 6    | -0.205458 | -0.497765 | 0.992063  | 0.996338  | 1.000      |
| 254 GOBP-TELENCEPHALON.DEVELOPMENT                     | GO:0021537    | 7    | -0.201269 | -0.500782 | 0.989026  | 0.997547  | 1.000      |
| 255 GOBP-CELL-CELL.ADHESION                            | GO:0008609    | 14   | -0.160845 | -0.505760 | 0.977833  | 0.998052  | 1.000      |

Continuation of Table S3

| NAME | ID                                                | SIZE | ES        | NES       | NOM.p.val | FDR.q.val | FWER.p.val |
|------|---------------------------------------------------|------|-----------|-----------|-----------|-----------|------------|
| 256  | GOBP-RESPONSE.TO.ABIOTIC.STIMULUS                 | 27   | -0.139435 | -0.508388 | 0.981395  | 0.999309  | 1.000      |
| 257  | GOBP-IMPORT.INTO.CELL                             | 6    | -0.212604 | -0.516838 | 0.986188  | 0.998349  | 1.000      |
| 258  | GOBP-EPITHELIUM.DEVELOPMENT                       | 15   | -0.164005 | -0.518340 | 0.974296  | 0.999973  | 1.000      |
| 259  | GOBP-POSITIVE.REGULATION.OF.NEURON.DEATH          | 5    | -0.230676 | -0.519159 | 0.979856  | 1.000000  | 1.000      |
| 260  | GOBP-REGULATION.OF.GTPASE.ACTIVITY                | 5    | -0.233002 | -0.528485 | 0.971852  | 1.000000  | 1.000      |
| 261  | GOBP-RESPONSE.TO.LIGHT.STIMULUS                   | 11   | -0.181539 | -0.530893 | 0.963589  | 1.000000  | 1.000      |
| 262  | REACTOME.ONCOGENIC.MAPK.SIGNALING                 | 5    | -0.234317 | -0.530914 | 0.976261  | 1.000000  | 1.000      |
| 263  | GOBP-TRANSMEMBRANE.RECEPTOR.PROTEIN.TYROSINE.K... | 19   | -0.158897 | -0.531921 | 0.972941  | 1.000000  | 1.000      |
| 264  | GOBP-EMBRYONIC.MORPHOGENESIS                      | 6    | -0.217951 | -0.532552 | 0.983075  | 1.000000  | 1.000      |
| 265  | GOBP-NEGATIVE.REGULATION.OF.NUCLEOBASE.CONTAIN... | 13   | -0.175333 | -0.539493 | 0.964149  | 1.000000  | 1.000      |
| 266  | GOBP-ENZYME.LINKED.RECEPTOR.PROTEIN.SIGNALING...  | 24   | -0.150104 | -0.540346 | 0.967442  | 1.000000  | 1.000      |
| 267  | GOBP-RESPONSE.TO.NICOTINE                         | 7    | -0.215253 | -0.541431 | 0.972259  | 1.000000  | 1.000      |
| 268  | GOBP-NEGATIVE.REGULATION.OF.MULTICELLULAR.ORG...  | 15   | -0.171221 | -0.543129 | 0.972500  | 1.000000  | 1.000      |
| 269  | GOBP-PHOSPHATIDYLINOSITOL.3.KINASE.SIGNALING      | 7    | -0.219319 | -0.557360 | 0.953652  | 1.000000  | 1.000      |
| 270  | GOBP-POSITIVE.REGULATION.OF.ORGANELLE.ORGANIZA... | 10   | -0.198840 | -0.567053 | 0.951219  | 1.000000  | 1.000      |
| 271  | GOBP-REGULATION.OF.ANATOMICAL.STRUCTURE.SIZE      | 10   | -0.200522 | -0.569979 | 0.937904  | 1.000000  | 1.000      |
| 272  | REACTOME.SIGNALING.BY.NTRK2.TRKB                  | 6    | -0.231638 | -0.570158 | 0.957082  | 1.000000  | 1.000      |
| 273  | GOBP-CELLULAR.RESPONSE.TO.REACTIVE.OXYGEN.SPECIES | 7    | -0.225237 | -0.570272 | 0.954794  | 1.000000  | 1.000      |
| 274  | GOBP-CELLULAR.RESPONSE.TO.CHEMICAL.STRESS         | 7    | -0.225237 | -0.572638 | 0.951743  | 1.000000  | 1.000      |
| 275  | GOBP-RESPONSE.TO.TEMPERATURE.STIMULUS             | 9    | -0.209151 | -0.576758 | 0.959239  | 1.000000  | 1.000      |
| 276  | GOBP-REGULATION.OF.NERVOUS.SYSTEM.DEVELOPMENT     | 15   | -0.181021 | -0.580747 | 0.941323  | 1.000000  | 1.000      |
| 277  | GOBP-MATERNAL.PROCESS.INVOLVED.IN.FEMALE.PREGN... | 5    | -0.250799 | -0.581010 | 0.949438  | 1.000000  | 1.000      |
| 278  | GOBP-AGING                                        | 13   | -0.190038 | -0.582161 | 0.945980  | 1.000000  | 1.000      |
| 279  | GOBP-TUBE.DEVELOPMENT                             | 18   | -0.174921 | -0.582584 | 0.932845  | 1.000000  | 1.000      |
| 280  | GOBP-CARBOHYDRATE.METABOLIC.PROCESS               | 9    | -0.214767 | -0.589052 | 0.935271  | 1.000000  | 1.000      |
| 281  | GOBP-TEMPERATURE.HOMEOSTASIS                      | 5    | -0.255721 | -0.589346 | 0.943870  | 1.000000  | 1.000      |
| 282  | REACTOME.MYD88.INDEPENDENT.TLR4.CASCADE           | 8    | -0.223096 | -0.589475 | 0.952128  | 1.000000  | 1.000      |
| 283  | GOBP-REGULATION.OF.CELL.DEVELOPMENT               | 15   | -0.185295 | -0.590447 | 0.931204  | 1.000000  | 1.000      |
| 284  | GOBP-CELL.ACTIVATION                              | 22   | -0.169255 | -0.591346 | 0.935096  | 1.000000  | 1.000      |
| 285  | GOBP-MACROMOLECULE.CATABOLIC.PROCESS              | 11   | -0.207125 | -0.592384 | 0.950943  | 1.000000  | 1.000      |
| 286  | REACTOME.TOLL.LIKE.RECEPTOR.CASCADES              | 8    | -0.223096 | -0.593698 | 0.943122  | 1.000000  | 1.000      |
| 287  | GOBP-APOPTOTIC.PROCESS                            | 35   | -0.157896 | -0.593930 | 0.914124  | 1.000000  | 1.000      |
| 288  | REACTOME.TOLL.LIKE.RECEPTOR.TLR1.TLR2.CASCADE     | 8    | -0.223096 | -0.595746 | 0.940781  | 1.000000  | 1.000      |
| 289  | GOBP-REGULATION.OF.NEURON.PROJECTION.DEVELOPMENT  | 16   | -0.183209 | -0.597279 | 0.928922  | 1.000000  | 1.000      |
| 290  | GOBP-DNA.METABOLIC.PROCESS                        | 6    | -0.247793 | -0.597850 | 0.933151  | 1.000000  | 1.000      |
| 291  | REACTOME.TOLL.LIKE.RECEPTOR.9.TLR9.CASCADE        | 8    | -0.223096 | -0.599521 | 0.934492  | 1.000000  | 1.000      |
| 292  | GOBP-REGULATION.OF.NEUROGENESIS                   | 14   | -0.189992 | -0.604027 | 0.920854  | 1.000000  | 1.000      |
| 293  | GOBP-REGULATION.OF.PROTEIN.SERINE.THREONINE.KI... | 12   | -0.200390 | -0.604047 | 0.920984  | 1.000000  | 1.000      |
| 294  | GOBP-CELLULAR.COMPONENT.DISASSEMBLY               | 6    | -0.251663 | -0.605072 | 0.935705  | 1.000000  | 1.000      |
| 295  | GOBP.SMALL.MOLECULE.BIOSYNTHETIC.PROCESS          | 5    | -0.264897 | -0.605481 | 0.930595  | 1.000000  | 1.000      |
| 296  | GOBP-REGULATION.OF.SMALL.MOLECULE.METABOLIC.PR... | 9    | -0.220724 | -0.606682 | 0.919419  | 1.000000  | 1.000      |
| 297  | GOBP-RESPONSE.TO.RADIATION                        | 13   | -0.199618 | -0.611987 | 0.925786  | 1.000000  | 1.000      |
| 298  | REACTOME.LEISHMANIA.INFECTION                     | 10   | -0.213991 | -0.612256 | 0.926509  | 1.000000  | 1.000      |

Continuation of Table S3

| NAME | ID                                                | SIZE | ES        | NES       | NOM.p.val | FDR.q.val | FWER.p.val |
|------|---------------------------------------------------|------|-----------|-----------|-----------|-----------|------------|
| 299  | REACTOME-HEMOSTASIS                               | 14   | -0.202156 | -0.619065 | 0.900990  | 1.000000  | 1.000      |
| 300  | GOBP-FORBRAIN-DEVELOPMENT                         | 10   | -0.218096 | -0.622794 | 0.911539  | 1.000000  | 1.000      |
| 301  | REACTOME-INTERLEUKIN_17-SIGNALING                 | 6    | -0.258818 | -0.622892 | 0.923717  | 1.000000  | 1.000      |
| 302  | GOBP-POSITIVE-REGULATION-OF-CELL-DEATH            | 19   | -0.185289 | -0.624362 | 0.897714  | 1.000000  | 1.000      |
| 303  | GOBP-CIRCADIAN-REGULATION-OF-GENE-EXPRESSION      | 5    | -0.274707 | -0.627660 | 0.927660  | 1.000000  | 1.000      |
| 304  | GOBP-NEGATIVE-REGULATION-OF-LOCOMOTION            | 5    | -0.277471 | -0.626907 | 0.912676  | 1.000000  | 1.000      |
| 305  | REACTOME-SIGNALING-BY-NTRKS                       | 18   | -0.189979 | -0.628316 | 0.917476  | 1.000000  | 1.000      |
| 306  | GOBP-REGULATION-OF-INTRACELLULAR-SIGNAL-TRANSD... | 21   | -0.181653 | -0.629324 | 0.913404  | 1.000000  | 1.000      |
| 307  | GOBP-CELL-PART-MORPHOGENESIS                      | 25   | -0.176486 | -0.629438 | 0.911661  | 1.000000  | 1.000      |
| 308  | GOBP-CELL-MORPHOGENESIS                           | 25   | -0.176486 | -0.632011 | 0.911935  | 1.000000  | 1.000      |
| 309  | GOBP-MULTICELLULAR-ORGANISMAL-RESPONSE-TO-STRESS  | 5    | -0.276209 | -0.634017 | 0.903930  | 1.000000  | 1.000      |
| 310  | GOBP-APOPTOTIC-SIGNALING-PATHWAY                  | 15   | -0.202856 | -0.637952 | 0.898875  | 1.000000  | 1.000      |
| 311  | GOBP-CELLULAR-COMPONENT-MORPHOGENESIS             | 25   | -0.176486 | -0.639343 | 0.893887  | 1.000000  | 1.000      |
| 312  | GOBP-CELLULAR-RESPONSE-TO-CADMIIUMION             | 5    | -0.279725 | -0.642169 | 0.932867  | 1.000000  | 1.000      |
| 313  | REACTOME-LICAM-INTERACTIONS                       | 5    | -0.281745 | -0.642213 | 0.891971  | 1.000000  | 1.000      |
| 314  | GOBP-REGULATION-OF-PROTEIN-LOCALIZATION-TO-MEM... | 7    | -0.256270 | -0.649900 | 0.893960  | 1.000000  | 1.000      |
| 315  | GOBP-REGULATION-OF-LIPID-LOCALIZATION             | 5    | -0.287071 | -0.655125 | 0.900990  | 1.000000  | 1.000      |
| 316  | GOBP-CELLULAR-RESPONSE-TO-DNA-DAMAGE-STIMULUS     | 5    | -0.284945 | -0.655841 | 0.881503  | 1.000000  | 1.000      |
| 317  | GOBP-REGULATION-OF-ANATOMICAL-STRUCTURE-MORPHO... | 17   | -0.199600 | -0.656454 | 0.893285  | 1.000000  | 1.000      |
| 318  | GOBP-POSITIVE-REGULATION-OF-DNA-BINDING-TRANSC... | 10   | -0.234812 | -0.659850 | 0.886719  | 1.000000  | 1.000      |
| 319  | GOBP-REGULATION-OF-PHOSPHATIDYLINOSITOL_3-KINA... | 6    | -0.267683 | -0.659917 | 0.887943  | 1.000000  | 1.000      |
| 320  | GOBP-ORGANIC-HYDROXY-COMPOUND-METABOLIC-PROCESS   | 8    | -0.245539 | -0.663838 | 0.879730  | 1.000000  | 1.000      |
| 321  | GOBP-MUSCLE-TISSUE-DEVELOPMENT                    | 11   | -0.227915 | -0.664168 | 0.902188  | 1.000000  | 1.000      |
| 322  | REACTOME-PLATELET-ACTIVATION-SIGNALING-AND-AGG... | 7    | -0.262887 | -0.665760 | 0.881379  | 1.000000  | 1.000      |
| 323  | GOBP-RECEPTOR-MEDIATED-ENDOCYTOSIS                | 6    | -0.273648 | -0.666842 | 0.895863  | 1.000000  | 1.000      |
| 324  | GOBP-POLYSACCHARIDE-METABOLIC-PROCESS             | 5    | -0.292553 | -0.668184 | 0.888418  | 1.000000  | 1.000      |
| 325  | GOBP-CELLULAR-RESPONSE-TO-LIPID                   | 15   | -0.208988 | -0.669561 | 0.865385  | 1.000000  | 1.000      |
| 326  | GOBP-REGULATION-OF-PEPTIDASE-ACTIVITY             | 10   | -0.232725 | -0.670308 | 0.876463  | 1.000000  | 1.000      |
| 327  | GOBP-REGULATION-OF-GLIOGENESIS                    | 5    | -0.295102 | -0.673243 | 0.883357  | 1.000000  | 1.000      |
| 328  | GOBP-GLIAL-CELL-DIFFERENTIATION                   | 10   | -0.238077 | -0.674546 | 0.858466  | 1.000000  | 1.000      |
| 329  | GOBP-EXOCYTOSIS                                   | 11   | -0.230807 | -0.676119 | 0.868020  | 1.000000  | 1.000      |
| 330  | GOBP-REGULATION-OF-PROTEOLYSIS                    | 12   | -0.225892 | -0.678539 | 0.859395  | 1.000000  | 1.000      |
| 331  | GOBP-NEGATIVE-REGULATION-OF-RESPONSE-TO-STIMULUS  | 16   | -0.210434 | -0.678635 | 0.859069  | 1.000000  | 1.000      |
| 332  | GOBP-REGULATION-OF-WNT-SIGNALING-PATHWAY          | 5    | -0.300503 | -0.681691 | 0.876274  | 1.000000  | 1.000      |
| 333  | GOBP-POSITIVE-REGULATION-OF-GLIOGENESIS           | 5    | -0.295102 | -0.683679 | 0.881924  | 1.000000  | 1.000      |
| 334  | GOBP-INTRACELLULAR-RECEPTOR-SIGNALING-PATHWAY     | 5    | -0.302027 | -0.683743 | 0.881857  | 1.000000  | 1.000      |
| 335  | GOBP-PLATELET-ACTIVATION                          | 6    | -0.283390 | -0.685073 | 0.875683  | 1.000000  | 1.000      |
| 336  | GOBP-REGULATION-OF-CIRCADIAN-RHYTHM               | 7    | -0.268253 | -0.687284 | 0.859551  | 1.000000  | 1.000      |
| 337  | GOBP-REGULATION-OF-PROTEIN-LOCALIZATION-TO-CEL... | 6    | -0.285480 | -0.694618 | 0.857542  | 1.000000  | 1.000      |
| 338  | GOBP-NEGATIVE-REGULATION-OF-RESPONSE-TO-EXTERN... | 5    | -0.307113 | -0.698584 | 0.849432  | 1.000000  | 1.000      |
| 339  | GOBP-REGULATION-OF-PROTEIN-KINASE-ACTIVITY        | 21   | -0.204638 | -0.706512 | 0.828070  | 1.000000  | 1.000      |
| 340  | GOBP-POSITIVE-REGULATION-OF-APOPTOTIC-SIGNALIN... | 5    | -0.314914 | -0.713002 | 0.845494  | 1.000000  | 1.000      |
| 341  | GOBP-REGULATION-OF-TRANSFERASE-ACTIVITY           | 21   | -0.204638 | -0.713315 | 0.817527  | 1.000000  | 1.000      |

Continuation of Table S3

|     | NAME                                              | ID            | SIZE | ES        | NES       | NOM.p.val | FDR.q.val | FWER.p.val |
|-----|---------------------------------------------------|---------------|------|-----------|-----------|-----------|-----------|------------|
| 342 | GOBP-MEMORY                                       | GO-0007613    | 13   | -0.233673 | -0.714260 | 0.835600  | 1.000000  | 1.000      |
| 343 | GOBP-GENERATION-OF-PRECURSOR-METABOLITES-AND-E... | GO-0006091    | 5    | -0.314718 | -0.717186 | 0.831697  | 1.000000  | 1.000      |
| 344 | GOBP-NEGATIVE-REGULATION-OF-PHOSPHORUS-METABOL... | GO-0010563    | 9    | -0.262971 | -0.718416 | 0.821935  | 1.000000  | 1.000      |
| 345 | GOBP-COGNITION                                    | GO-0050890    | 28   | -0.198584 | -0.720678 | 0.827546  | 1.000000  | 1.000      |
| 346 | GOBP-FC-EPSILON-RECEPTOR-SIGNALING-PATHWAY        | GO-0038095    | 7    | -0.281963 | -0.721384 | 0.834492  | 1.000000  | 1.000      |
| 347 | REACTOME-FC-EPSILON-RECEPTOR-FCER1-SIGNALING      | R-RNO-2454202 | 7    | -0.281963 | -0.721581 | 0.818801  | 1.000000  | 1.000      |
| 348 | GOBP-CARBOHYDRATE-BIOSYNTHETIC-PROCESS            | GO-0016051    | 5    | -0.323869 | -0.722697 | 0.829912  | 1.000000  | 1.000      |
| 349 | GOBP-RESPONSE-TO-WOUNDING                         | GO-0009611    | 15   | -0.227930 | -0.725898 | 0.822864  | 1.000000  | 1.000      |
| 350 | GOBP-ERK1-AND-ERK2-CASCADE                        | GO-0070371    | 5    | -0.322805 | -0.727958 | 0.825648  | 1.000000  | 1.000      |
| 351 | GOBP-PEPTIDE-METABOLIC-PROCESS                    | GO-0006518    | 11   | -0.246237 | -0.728380 | 0.805447  | 1.000000  | 1.000      |
| 352 | GOBP-REGULATION-OF-MAPK-CASCADE                   | GO-0043408    | 13   | -0.239447 | -0.728918 | 0.832723  | 1.000000  | 1.000      |
| 353 | REACTOME-CELLULAR-RESPONSES-TO-EXTERNAL-STIMULI   | R-RNO-8953897 | 11   | -0.248237 | -0.730666 | 0.825129  | 1.000000  | 1.000      |
| 354 | GOBP-NEGATIVE-REGULATION-OF-ION-TRANSPORT         | GO-0043271    | 11   | -0.250337 | -0.730796 | 0.819338  | 1.000000  | 1.000      |
| 355 | GOBP-RESPONSE-TO-ACID-CHEMICAL                    | GO-0001101    | 6    | -0.295827 | -0.731132 | 0.820690  | 1.000000  | 1.000      |
| 356 | GOBP-RECEPTOR-INTERNALIZATION                     | GO-0031623    | 5    | -0.318608 | -0.732266 | 0.819820  | 1.000000  | 1.000      |
| 357 | GOBP-REGULATION-OF-CATABOLIC-PROCESS              | GO-0009894    | 13   | -0.236000 | -0.732349 | 0.803198  | 1.000000  | 1.000      |
| 358 | GOBP-REGULATION-OF-CARBOHYDRATE-BIOSYNTHETIC-P... | GO-0043255    | 5    | -0.323869 | -0.732467 | 0.800000  | 1.000000  | 1.000      |
| 359 | GOBP-RECEPTOR-METABOLIC-PROCESS                   | GO-0043112    | 5    | -0.318608 | -0.735109 | 0.796243  | 1.000000  | 1.000      |
| 360 | GOBP-NEGATIVE-REGULATION-OF-PROTEIN-MODIFICATI... | GO-0031400    | 10   | -0.260258 | -0.735891 | 0.807939  | 1.000000  | 1.000      |
| 361 | GOBP-AMYLOID-PRECURSOR-PROTEIN-CATABOLIC-PROCESS  | GO-0042987    | 5    | -0.324460 | -0.737094 | 0.810811  | 1.000000  | 1.000      |
| 362 | GOBP-POSITIVE-REGULATION-OF-HYDROLASE-ACTIVITY    | GO-0051345    | 16   | -0.227415 | -0.738750 | 0.807692  | 1.000000  | 1.000      |
| 363 | GOBP-REGULATION-OF-PROTEIN-PHOSPHORYLATION        | GO-0001932    | 25   | -0.207804 | -0.738757 | 0.791762  | 1.000000  | 1.000      |
| 364 | GOBP-REGULATION-OF-CELLULAR-COMPONENT-BIOGENESIS  | GO-0044087    | 10   | -0.263280 | -0.739517 | 0.799228  | 1.000000  | 1.000      |
| 365 | GOBP-REGULATION-OF-APOPTOTIC-SIGNALING-PATHWAY    | GO-2001233    | 10   | -0.261930 | -0.739953 | 0.805627  | 1.000000  | 1.000      |
| 366 | GOBP-REGULATION-OF-GROWTH                         | GO-0040008    | 13   | -0.240030 | -0.742395 | 0.803896  | 1.000000  | 1.000      |
| 367 | GOBP-AMYLOID-BETA-METABOLIC-PROCESS               | GO-0050435    | 5    | -0.324460 | -0.746784 | 0.803596  | 1.000000  | 1.000      |
| 368 | GOBP-AMYLOID-PRECURSOR-PROTEIN-METABOLIC-PROCESS  | GO-0042982    | 5    | -0.324460 | -0.746821 | 0.802651  | 1.000000  | 1.000      |
| 369 | GOBP-REGULATION-OF-CARBOHYDRATE-METABOLIC-PROCESS | GO-0006109    | 5    | -0.323869 | -0.750759 | 0.773371  | 1.000000  | 1.000      |
| 370 | GOBP-REPRODUCTION                                 | GO-0000003    | 18   | -0.223628 | -0.751264 | 0.790898  | 1.000000  | 1.000      |
| 371 | GOBP-NEGATIVE-REGULATION-OF-NERVOUS-SYSTEM-DEV... | GO-0051961    | 5    | -0.330984 | -0.751568 | 0.787519  | 1.000000  | 1.000      |
| 372 | GOBP-POSITIVE-REGULATION-OF-INTRACELLULAR-SIGN... | GO-1902533    | 14   | -0.237562 | -0.751615 | 0.796548  | 1.000000  | 1.000      |
| 373 | GOBP-POSITIVE-REGULATION-OF-LOCOMOTION            | GO-0040017    | 11   | -0.258913 | -0.754353 | 0.795165  | 1.000000  | 1.000      |
| 374 | GOBP-RESPONSE-TO-MONOSACCHARIDE                   | GO-0034284    | 5    | -0.329580 | -0.756305 | 0.790801  | 1.000000  | 1.000      |
| 375 | GOBP-LIPID-LOCALIZATION                           | GO-0010876    | 10   | -0.272237 | -0.756768 | 0.766753  | 1.000000  | 1.000      |
| 376 | GOBP-NEGATIVE-REGULATION-OF-ANION-TRANSPORT       | GO-1903792    | 8    | -0.281373 | -0.762099 | 0.785034  | 1.000000  | 1.000      |
| 377 | REACTOME-ADAPTIVE-IMMUNE-SYSTEM                   | R-RNO-1280218 | 9    | -0.278713 | -0.764186 | 0.780355  | 1.000000  | 1.000      |
| 378 | GOBP-REGULATION-OF-HORMONE-LEVELS                 | GO-0010817    | 12   | -0.252688 | -0.764320 | 0.777070  | 1.000000  | 1.000      |
| 379 | GOBP-NEGATIVE-REGULATION-OF-CELL-DEVELOPMENT      | GO-0010721    | 6    | -0.316857 | -0.765843 | 0.759184  | 1.000000  | 1.000      |
| 380 | GOBP-RESPONSE-TO-CARBOHYDRATE                     | GO-0009743    | 5    | -0.329580 | -0.765861 | 0.796215  | 1.000000  | 1.000      |
| 381 | GOBP-CIRCADIAN-RHYTHM                             | GO-0007623    | 13   | -0.247202 | -0.766661 | 0.766460  | 1.000000  | 1.000      |
| 382 | GOBP-CELLULAR-CARBOHYDRATE-METABOLIC-PROCESS      | GO-0044262    | 5    | -0.342016 | -0.773555 | 0.788489  | 1.000000  | 1.000      |
| 383 | GOBP-MONOAMINE-TRANSPORT                          | GO-0015844    | 5    | -0.337074 | -0.775095 | 0.749646  | 1.000000  | 1.000      |
| 384 | GOBP-LYMPHOCYTE-ACTIVATION                        | GO-0046649    | 10   | -0.270374 | -0.778554 | 0.755263  | 1.000000  | 1.000      |



Continuation of Table S3

| NAME | ID                                                | SIZE | ES        | NES       | NOM.p.val | FDR.q.val | FWER.p.val |
|------|---------------------------------------------------|------|-----------|-----------|-----------|-----------|------------|
| 385  | GOBP-ORGANIC-HYDROXY-COMPOUND-TRANSPORT           | 6    | -0.321598 | -0.780777 | 0.761636  | 1.000000  | 1.000      |
| 386  | GOBP-REGULATION-OF-CELL-ACTIVATION                | 8    | -0.298521 | -0.781291 | 0.738606  | 1.000000  | 1.000      |
| 387  | GOBP-NEURON-DIFFERENTIATION                       | 37   | -0.206484 | -0.781932 | 0.741379  | 1.000000  | 1.000      |
| 388  | GOBP-REGULATION-OF-PEPTIDYL-TYROSINE-PHOSPHORY... | 9    | -0.287594 | -0.782675 | 0.749340  | 1.000000  | 1.000      |
| 389  | GOBP-MUSCLE-CELL-PROLIFERATION                    | 8    | -0.296209 | -0.784862 | 0.765605  | 1.000000  | 1.000      |
| 390  | GOBP-BIOLOGICAL-ADHESION                          | 19   | -0.234473 | -0.785669 | 0.736397  | 1.000000  | 1.000      |
| 391  | GOBP-POSITIVE-REGULATION-OF-PHOSPHORUS-METABOL... | 23   | -0.225402 | -0.786456 | 0.752969  | 1.000000  | 1.000      |
| 392  | GOBP-NEGATIVE-REGULATION-OF-CELLULAR-COMPONENT... | 11   | -0.265278 | -0.788297 | 0.739355  | 1.000000  | 1.000      |
| 393  | GOBP-REGULATION-OF-RESPONSE-TO-STRESS             | 19   | -0.231922 | -0.788348 | 0.756126  | 1.000000  | 1.000      |
| 394  | GOBP-RESPONSE-TO-TUMOR-NECROSIS-FACTOR            | 7    | -0.303492 | -0.788455 | 0.741287  | 1.000000  | 1.000      |
| 395  | GOBP-CHROMOSOME-ORGANIZATION                      | 6    | -0.333024 | -0.789546 | 0.749638  | 1.000000  | 1.000      |
| 396  | REACTOME-ANTI-INFLAMMATORY-RESPONSE-FAVOURING...  | 5    | -0.347893 | -0.791148 | 0.736919  | 1.000000  | 1.000      |
| 397  | GOBP-POSITIVE-REGULATION-OF-TRANSFERASE-ACTIVITY  | 19   | -0.237680 | -0.791851 | 0.746199  | 1.000000  | 1.000      |
| 398  | REACTOME-NEUROUS-SYSTEM-DEVELOPMENT               | 14   | -0.250086 | -0.792115 | 0.737624  | 1.000000  | 1.000      |
| 399  | GOBP-RHYTHMIC-PROCESS                             | 15   | -0.246349 | -0.792344 | 0.757463  | 1.000000  | 1.000      |
| 400  | GOBP-LEUKOCYTE-MIGRATION                          | 6    | -0.327994 | -0.792360 | 0.741703  | 1.000000  | 1.000      |
| 401  | GOBP-REGULATION-OF-MAP-KINASE-ACTIVITY            | 9    | -0.286182 | -0.792552 | 0.736220  | 1.000000  | 1.000      |
| 402  | GOBP-COAGULATION                                  | 8    | -0.295169 | -0.793318 | 0.733062  | 1.000000  | 1.000      |
| 403  | GOBP-POSITIVE-REGULATION-OF-ANION-TRANSPORT       | 9    | -0.291891 | -0.793514 | 0.738667  | 1.000000  | 1.000      |
| 404  | GOBP-REGULATION-OF-LONG-TERM-SYNAPTIC-POTENTIA... | 6    | -0.324315 | -0.798614 | 0.739316  | 1.000000  | 1.000      |
| 405  | GOBP-PROTEIN-LOCALIZATION-TO-PLASMA-MEMBRANE      | 7    | -0.217439 | -0.799600 | 0.722772  | 1.000000  | 1.000      |
| 406  | GOBP-ACTIVATION-OF-PROTEIN-KINASE-ACTIVITY        | 10   | -0.279399 | -0.801079 | 0.738065  | 1.000000  | 1.000      |
| 407  | GOBP-NEGATIVE-REGULATION-OF-CELL-DIFFERENTIATION  | 13   | -0.261246 | -0.801478 | 0.724311  | 1.000000  | 1.000      |
| 408  | GOBP-NEGATIVE-REGULATION-OF-INTRACELLULAR-SIGN... | 7    | -0.312065 | -0.803536 | 0.724462  | 1.000000  | 1.000      |
| 409  | REACTOME-INNATE-IMMUNE-SYSTEM                     | 16   | -0.251708 | -0.806745 | 0.736646  | 1.000000  | 1.000      |
| 410  | GOBP-NEGATIVE-REGULATION-OF-TRANSPORT             | 13   | -0.261116 | -0.806812 | 0.714834  | 1.000000  | 1.000      |
| 411  | GOBP-POSITIVE-REGULATION-OF-MAP-KINASE-ACTIVITY   | 6    | -0.335041 | -0.807445 | 0.738714  | 1.000000  | 1.000      |
| 412  | GOBP-NEGATIVE-REGULATION-OF-DEVELOPMENTAL-PROCESS | 13   | -0.261246 | -0.807637 | 0.700614  | 1.000000  | 1.000      |
| 413  | GOBP-ACTIVATION-OF-MAPK-ACTIVITY                  | 6    | -0.335041 | -0.808041 | 0.697234  | 1.000000  | 1.000      |
| 414  | GOBP-CYTOSOLIC-CALCIUM-ION-TRANSPORT              | 7    | -0.321188 | -0.810720 | 0.722067  | 1.000000  | 1.000      |
| 415  | GOBP-CENTRAL-NERVOUS-SYSTEM-NEURON-DIFFERENTIA... | 5    | -0.359312 | -0.812780 | 0.695846  | 1.000000  | 1.000      |
| 416  | GOBP-MULTICELLULAR-ORGANISMAL-HOMEOSTASIS         | 12   | -0.267389 | -0.812828 | 0.716113  | 1.000000  | 1.000      |
| 417  | GOBP-LONG-TERM-SYNAPTIC-DEPRESSION                | 5    | -0.360830 | -0.815619 | 0.712857  | 1.000000  | 1.000      |
| 418  | GOBP-REGULATION-OF-EXTRINSIC-APOPTOTIC-SIGNAL...  | 6    | -0.341572 | -0.815894 | 0.710227  | 1.000000  | 1.000      |
| 419  | GOBP-MULTI-ORGANISM-PROCESS                       | 16   | -0.256654 | -0.818983 | 0.703202  | 1.000000  | 1.000      |
| 420  | GOBP-CALCIUM-ION-TRANSMEMBRANE-TRANSPORT          | 7    | -0.321188 | -0.819381 | 0.719346  | 1.000000  | 1.000      |
| 421  | GOBP-NEURON-MIGRATION                             | 5    | -0.352220 | -0.819526 | 0.702742  | 1.000000  | 1.000      |
| 422  | GOBP-REGULATION-OF-PROTEIN-MODIFICATION-PROCESS   | 28   | -0.220477 | -0.819563 | 0.704307  | 1.000000  | 1.000      |
| 423  | GOBP-REGULATION-OF-CELLULAR-AMIDE-METABOLIC-PR... | 9    | -0.299826 | -0.819862 | 0.706806  | 1.000000  | 1.000      |
| 424  | GOBP-POSITIVE-REGULATION-OF-CELL-GROWTH           | 6    | -0.303037 | -0.820012 | 0.695890  | 1.000000  | 1.000      |
| 425  | REACTOME-MAPK-TARGETS-NUCLEAR-EVENTS-MEDIATED...  | 5    | -0.364032 | -0.820301 | 0.719054  | 1.000000  | 1.000      |
| 426  | GOBP-REGULATION-OF-VASCULATURE-DEVELOPMENT        | 5    | -0.365558 | -0.820559 | 0.709440  | 1.000000  | 1.000      |
| 427  | GOBP-MEMBRANE-ORGANIZATION                        | 12   | -0.280177 | -0.824240 | 0.720099  | 1.000000  | 1.000      |

Continuation of Table S3

|     | NAME                                              | ID            | SIZE | ES        | NES       | NOM.p.val | FDR.q.val | FWER.p.val |
|-----|---------------------------------------------------|---------------|------|-----------|-----------|-----------|-----------|------------|
| 428 | GOBP-CALCIUM-ION-TRANSPORT-INTO-CYTOSOL           | GO-0060402    | 7    | -0.321188 | -0.824258 | 0.694102  | 1.000000  | 1.000      |
| 429 | GOBP-BIOLOGICAL-PROCESS-INVOLVED-IN-SYMBIOTIC.... | GO-004440     | 10   | -0.296362 | -0.826034 | 0.691275  | 1.000000  | 1.000      |
| 430 | GOBP-REGULATION-OF-PHOSPHORUS-METABOLIC-PROCESS   | GO-0051174    | 26   | -0.233215 | -0.828515 | 0.701493  | 1.000000  | 1.000      |
| 431 | GOBP-REGULATION-OF-PROTEIN-TYROSINEKINASE-ACT...  | GO-0061097    | 5    | -0.365047 | -0.828805 | 0.697778  | 1.000000  | 1.000      |
| 432 | GOBP-CELLULAR-MACROMOLECULE-CATABOLIC-PROCESS     | GO-0044265    | 5    | -0.373494 | -0.829246 | 0.731563  | 1.000000  | 1.000      |
| 433 | GOBP-SMOOTH-MUSCLE-CELL-PROLIFERATION             | GO-0048659    | 6    | -0.336269 | -0.830615 | 0.689605  | 1.000000  | 1.000      |
| 434 | GOBP-NEURON-DEVELOPMENT                           | GO-0048666    | 34   | -0.220567 | -0.833480 | 0.682682  | 1.000000  | 1.000      |
| 435 | GOBP-REGULATION-OF-CYSTEINE-TYPE-ENDOPEPTIDASE... | GO-2000116    | 9    | -0.306778 | -0.835725 | 0.666667  | 1.000000  | 1.000      |
| 436 | GOBP-ORGANIC-ACID-TRANSPORT                       | GO-0015849    | 7    | -0.334449 | -0.838143 | 0.697260  | 1.000000  | 1.000      |
| 437 | GOBP-REGULATION-OF-RECEPTOR-MEDIATED-ENDOCYTOSIS  | GO-0048259    | 5    | -0.365528 | -0.839147 | 0.681159  | 1.000000  | 1.000      |
| 438 | GOBP-LIPID-EXPORT-FROM-CELL                       | GO-0140353    | 5    | -0.372510 | -0.839741 | 0.677843  | 1.000000  | 1.000      |
| 439 | GOBP-POSITIVE-REGULATION-OF-PROTEIN-TYROSINEK...  | GO-0061098    | 5    | -0.365047 | -0.839977 | 0.666179  | 1.000000  | 1.000      |
| 440 | GOBP-RESPONSE-TO-INSULIN                          | GO-0032868    | 5    | -0.368516 | -0.841053 | 0.666667  | 1.000000  | 1.000      |
| 441 | REACTOME-NUCLEAR-EVENTS-KINASE-AND-TRANSCRIPTI... | R-RNO-198725  | 11   | -0.289384 | -0.843772 | 0.671018  | 1.000000  | 1.000      |
| 442 | GOBP-SMALL-GTPASE-MEDIATED-SIGNAL-TRANSDUCTION    | GO-0007264    | 8    | -0.314311 | -0.845060 | 0.672857  | 1.000000  | 1.000      |
| 443 | REACTOME-EXTRA-NUCLEAR-ESTROGEN-SIGNALING         | R-RNO-9008391 | 7    | -0.330617 | -0.846289 | 0.677241  | 1.000000  | 1.000      |
| 444 | GOBP-REGULATION-OF-METAL-ION-TRANSPORT            | GO-0010959    | 6    | -0.351460 | -0.847131 | 0.695291  | 1.000000  | 1.000      |
| 445 | GOBP-FATTY-ACID-TRANSPORT                         | GO-0015908    | 6    | -0.351436 | -0.851608 | 0.684432  | 1.000000  | 1.000      |
| 446 | GOBP-REGULATION-OF-CELLULAR-CATABOLIC-PROCESS     | GO-0031329    | 10   | -0.300297 | -0.851658 | 0.670935  | 1.000000  | 1.000      |
| 447 | GOBP-POSITIVE-REGULATION-OF-MAPK-CASCADE          | GO-0043410    | 9    | -0.312453 | -0.852425 | 0.679296  | 1.000000  | 1.000      |
| 448 | GOBP-POSITIVE-REGULATION-OF-CELL-ADHESION         | GO-0045785    | 7    | -0.337509 | -0.853958 | 0.655714  | 1.000000  | 1.000      |
| 449 | REACTOME-CELL-CYCLE-MITOTIC                       | R-RNO-69278   | 5    | -0.377700 | -0.854089 | 0.672012  | 1.000000  | 1.000      |
| 450 | GOBP-PROTEIN-LOCALIZATION-TO-CELL-JUNCTION        | GO-1902414    | 6    | -0.353868 | -0.857199 | 0.675714  | 1.000000  | 1.000      |
| 451 | GOBP-RESPONSE-TO-INORGANIC-SUBSTANCE              | GO-0010035    | 19   | -0.253701 | -0.857520 | 0.646635  | 1.000000  | 1.000      |
| 452 | GOBP-REGULATION-OF-CELLULAR-COMPONENT-MOVEMENT    | GO-0051270    | 15   | -0.269215 | -0.859562 | 0.635135  | 1.000000  | 1.000      |
| 453 | REACTOME-ESR-MEDIATED-SIGNALING                   | R-RNO-8939211 | 8    | -0.327527 | -0.862059 | 0.663968  | 1.000000  | 1.000      |
| 454 | GOBP-INORGANIC-ION-TRANSMEMBRANE-TRANSPORT        | GO-0098660    | 9    | -0.314256 | -0.863061 | 0.661499  | 1.000000  | 1.000      |
| 455 | GOBP-GROWTH                                       | GO-0040007    | 14   | -0.271291 | -0.863402 | 0.647700  | 1.000000  | 1.000      |
| 456 | GOBP-CELL-MORPHOGENESIS-INVOLVED-IN-NEURON-DIF... | GO-0048667    | 22   | -0.248468 | -0.865135 | 0.661593  | 1.000000  | 1.000      |
| 457 | GOBP-EPHRIN-RECEPTOR-SIGNALING-PATHWAY            | GO-0048013    | 5    | -0.371429 | -0.866126 | 0.652299  | 1.000000  | 1.000      |
| 458 | GOBP-CIRCULATORY-SYSTEM-PROCESS                   | GO-0003013    | 5    | -0.385791 | -0.866263 | 0.632267  | 1.000000  | 1.000      |
| 459 | GOBP-SECRETION                                    | GO-0046903    | 24   | -0.244187 | -0.867058 | 0.647740  | 1.000000  | 1.000      |
| 460 | GOBP-IMMUNE-EFFECTOR-PROCESS                      | GO-0002252    | 11   | -0.296621 | -0.870819 | 0.627937  | 1.000000  | 1.000      |
| 461 | GOBP-CELL-MORPHOGENESIS-INVOLVED-IN-DIFFERENTI... | GO-0000904    | 22   | -0.248468 | -0.872073 | 0.648585  | 1.000000  | 1.000      |
| 462 | GOBP-CELLULAR-AMIDE-METABOLIC-PROCESS             | GO-0043603    | 12   | -0.292983 | -0.872282 | 0.625641  | 1.000000  | 1.000      |
| 463 | GOBP-WOUND-HEALING                                | GO-0042060    | 13   | -0.287996 | -0.872979 | 0.629032  | 1.000000  | 1.000      |
| 464 | REACTOME-SIGNALING-BY-NUCLEAR-RECEPTORS           | R-RNO-9006931 | 8    | -0.327527 | -0.873797 | 0.659489  | 1.000000  | 1.000      |
| 465 | GOBP-PEPTIDYL-LYSINE-MODIFICATION                 | GO-0018205    | 5    | -0.384058 | -0.874839 | 0.653793  | 1.000000  | 1.000      |
| 466 | GOBP-MUSCLE-STRUCTURE-DEVELOPMENT                 | GO-0061061    | 16   | -0.270165 | -0.875478 | 0.631579  | 1.000000  | 1.000      |
| 467 | GOBP-REGULATION-OF-PROTEIN-BINDING                | GO-0043393    | 7    | -0.348727 | -0.876947 | 0.645333  | 1.000000  | 1.000      |
| 468 | GOBP-NEGATIVE-REGULATION-OF-TRANSFERASE-ACTIVITY  | GO-0051348    | 5    | -0.391372 | -0.877966 | 0.651685  | 1.000000  | 1.000      |
| 469 | GOBP-APOPTOTIC-MITOCHONDRIAL-CHANGES              | GO-0008637    | 6    | -0.367975 | -0.881390 | 0.615922  | 1.000000  | 1.000      |
| 470 | GOBP-REGULATION-OF-CELL-ADHESION                  | GO-0030155    | 13   | -0.291838 | -0.888093 | 0.628644  | 1.000000  | 1.000      |

Continuation of Table S3

|     | NAME                                                             | ID         | SIZE | ES        | NES       | NOM.p.val | FDR.q.val | FWER.p.val |
|-----|------------------------------------------------------------------|------------|------|-----------|-----------|-----------|-----------|------------|
| 471 | GOBP-NEUROGENESIS                                                | GO-0022008 | 41   | -0.233345 | -0.888388 | 0.602941  | 1.000000  | 1.000      |
| 472 | GOBP-POSITIVE-REGULATION-OF-TRANSPORT                            | GO-0051050 | 26   | -0.252016 | -0.890140 | 0.620023  | 1.000000  | 1.000      |
| 473 | GOBP-RESPONSE-TO-HEAT                                            | GO-0009408 | 7    | -0.354755 | -0.893733 | 0.613423  | 1.000000  | 1.000      |
| 474 | GOBP-NEGATIVE-REGULATION-OF-KINASE-ACTIVITY                      | GO-0033673 | 5    | -0.391372 | -0.900585 | 0.610795  | 1.000000  | 1.000      |
| 475 | GOBP-CELL-MIGRATION                                              | GO-0016477 | 22   | -0.255407 | -0.901862 | 0.587544  | 1.000000  | 1.000      |
| 476 | GOBP-ANATOMICAL-STRUCTURE-HOMEOSTASIS                            | GO-0060249 | 7    | -0.358301 | -0.906050 | 0.609418  | 1.000000  | 1.000      |
| 477 | GOBP-CARBOHYDRATE-DERIVATIVE-BIOSYNTHETIC-PROCESS                | GO-1901137 | 5    | -0.401259 | -0.909092 | 0.591777  | 1.000000  | 1.000      |
| 478 | GOBP-CELL-PROJECTION-ORGANIZATION                                | GO-0030030 | 35   | -0.239652 | -0.909930 | 0.586009  | 1.000000  | 1.000      |
| 479 | GOBP-RESPONSE-TO-CALCIUM-ION                                     | GO-0051592 | 6    | -0.375190 | -0.910040 | 0.608696  | 1.000000  | 1.000      |
| 480 | GOBP-PURINE-CONTAINING-COMPOUND-METABOLIC-PROCESS                | GO-0072521 | 6    | -0.383959 | -0.910331 | 0.616162  | 1.000000  | 1.000      |
| 481 | GOBP-REGULATION-OF-HYDROLASE-ACTIVITY                            | GO-0051336 | 22   | -0.264684 | -0.911371 | 0.586493  | 1.000000  | 1.000      |
| 482 | GOBP-INSULIN-SECRETION                                           | GO-0030073 | 7    | -0.359307 | -0.911617 | 0.573351  | 1.000000  | 1.000      |
| 483 | GOBP-NEGATIVE-REGULATION-OF-SYNAPTIC-TRANSMISSION                | GO-0050805 | 6    | -0.375991 | -0.913455 | 0.604082  | 1.000000  | 1.000      |
| 484 | GOBP-POSITIVE-REGULATION-OF-PROTEIN-MODIFICATION                 | GO-0031401 | 22   | -0.264057 | -0.914785 | 0.589327  | 1.000000  | 1.000      |
| 485 | GOBP-ORGANOPHOSPHATE-METABOLIC-PROCESS                           | GO-0019637 | 8    | -0.343181 | -0.916551 | 0.592593  | 1.000000  | 1.000      |
| 486 | GOBP-AMINO-ACID-TRANSPORT                                        | GO-0006865 | 6    | -0.383968 | -0.917194 | 0.598011  | 1.000000  | 1.000      |
| 487 | GOBP-REGULATION-OF-TRANSPORT                                     | GO-0051049 | 44   | -0.241696 | -0.920039 | 0.573184  | 1.000000  | 1.000      |
| 488 | GOBP-PEPTIDE-HORMONE-SECRETION                                   | GO-0030072 | 7    | -0.359307 | -0.920183 | 0.561570  | 1.000000  | 1.000      |
| 489 | GOBP-DEVELOPMENTAL-PROCESS-INVOLVED-IN-REPRODUCTION              | GO-0003006 | 11   | -0.314398 | -0.920385 | 0.602740  | 1.000000  | 1.000      |
| 490 | GOBP-HOMEOSTATIC-PROCESS                                         | GO-0042592 | 31   | -0.251521 | -0.922662 | 0.564825  | 1.000000  | 1.000      |
| 491 | GOBP-MONOCARBOXYLIC-ACID-TRANSPORT                               | GO-0015718 | 5    | -0.407285 | -0.922815 | 0.603129  | 1.000000  | 1.000      |
| 492 | GOBP-ACIDIC-AMINO-ACID-TRANSPORT                                 | GO-0015800 | 5    | -0.407285 | -0.923388 | 0.577260  | 1.000000  | 1.000      |
| 493 | GOBP-ORGANIC-ANION-TRANSPORT                                     | GO-0015711 | 6    | -0.383968 | -0.924567 | 0.569801  | 1.000000  | 1.000      |
| 494 | GOBP-MAPK-CASCADE                                                | GO-0000165 | 18   | -0.280777 | -0.925441 | 0.574316  | 1.000000  | 1.000      |
| 495 | GOBP-REGULATION-OF-VASCULAR-ASSOCIATED-SMOOTH-MUSCLE-CONTRACTION | GO-1904705 | 5    | -0.401350 | -0.926727 | 0.571429  | 1.000000  | 1.000      |
| 496 | GOBP-REGULATION-OF-CELLULAR-RESPONSE-TO-STRESS                   | GO-0080135 | 9    | -0.337870 | -0.927364 | 0.572549  | 1.000000  | 1.000      |
| 497 | GOBP-NEGATIVE-REGULATION-OF-CELL-PROJECTION-OR-CELL-ADHESION     | GO-0031345 | 5    | -0.410470 | -0.928369 | 0.577746  | 1.000000  | 1.000      |
| 498 | GOBP-POSITIVE-REGULATION-OF-PROTEIN-KINASE-ACTIVITY              | GO-0045860 | 18   | -0.277517 | -0.929140 | 0.543165  | 1.000000  | 1.000      |
| 499 | GOBP-POSITIVE-REGULATION-OF-PROTEIN-PHOSPHORYLATION              | GO-0001934 | 22   | -0.264057 | -0.929198 | 0.569428  | 1.000000  | 1.000      |
| 500 | GOBP-LONG-TERM-SYNAPTIC-POTENTIATION                             | GO-0060291 | 12   | -0.309167 | -0.930700 | 0.568354  | 1.000000  | 1.000      |
| 501 | GOBP-DICARBOXYLIC-ACID-TRANSPORT                                 | GO-0006835 | 5    | -0.407285 | -0.930833 | 0.558989  | 1.000000  | 1.000      |
| 502 | GOBP-CARBOXYLIC-ACID-TRANSPORT                                   | GO-0046942 | 6    | -0.383968 | -0.932373 | 0.566334  | 1.000000  | 1.000      |
| 503 | GOBP-REGULATION-OF-CELL-CYCLE                                    | GO-0051726 | 13   | -0.306685 | -0.933800 | 0.549875  | 1.000000  | 1.000      |
| 504 | GOBP-REGULATION-OF-MUSCLE-CELL-DIFFERENTIATION                   | GO-0051147 | 6    | -0.388416 | -0.935434 | 0.542373  | 1.000000  | 1.000      |
| 505 | GOBP-METAL-ION-HOMEOSTASIS                                       | GO-0055065 | 14   | -0.298810 | -0.936538 | 0.561064  | 1.000000  | 1.000      |
| 506 | HALLMARK-P13K-AKT-MTOR-SIGNALING                                 | M5923      | 6    | -0.388454 | -0.938234 | 0.570850  | 1.000000  | 1.000      |
| 507 | GOBP-ION-HOMEOSTASIS                                             | GO-0050801 | 16   | -0.290152 | -0.943794 | 0.547101  | 1.000000  | 1.000      |
| 508 | GOBP-RESPONSE-TO-PEPTIDE-HORMONE                                 | GO-0043434 | 13   | -0.311954 | -0.944205 | 0.526992  | 1.000000  | 1.000      |
| 509 | GOBP-ASSOCIATIVE-LEARNING                                        | GO-0008306 | 7    | -0.372650 | -0.945773 | 0.567227  | 1.000000  | 1.000      |
| 510 | GOBP-AMIDE-BIOSYNTHETIC-PROCESS                                  | GO-0043604 | 6    | -0.386379 | -0.948126 | 0.537517  | 1.000000  | 1.000      |
| 511 | GOBP-PEPTIDE-BIOSYNTHETIC-PROCESS                                | GO-0043043 | 6    | -0.386379 | -0.952491 | 0.537827  | 1.000000  | 1.000      |
| 512 | GOBP-POSITIVE-REGULATION-OF-PROTEOLYSIS                          | GO-0045862 | 8    | -0.362631 | -0.953400 | 0.545455  | 1.000000  | 1.000      |
| 513 | GOBP-SKELETAL-MUSCLE-ORGAN-DEVELOPMENT                           | GO-0060538 | 5    | -0.412002 | -0.953945 | 0.538244  | 1.000000  | 1.000      |

Continuation of Table S3

|     | NAME                                               | ID            | SIZE | ES        | NES       | NOM.p.val | FDR.q.val | FWER.p.val |
|-----|----------------------------------------------------|---------------|------|-----------|-----------|-----------|-----------|------------|
| 514 | GOBP-INTRACELLULAR-TRANSPORT                       | GO-0046907    | 10   | -0.334143 | -0.956493 | 0.523377  | 1.000000  | 1.000      |
| 515 | GOBP-NEGATIVE-REGULATION-OF-SIGNALING              | GO-0023057    | 21   | -0.281336 | -0.961626 | 0.525822  | 1.000000  | 1.000      |
| 516 | GOBP-EXCITATORY-CHEMICAL-SYNAPTIC-TRANSMISSION     | GO-0098976    | 5    | -0.416038 | -0.967427 | 0.497890  | 1.000000  | 1.000      |
| 517 | GOBP-DEVELOPMENTAL-MATURATION                      | GO-0021700    | 5    | -0.429347 | -0.968594 | 0.526761  | 1.000000  | 1.000      |
| 518 | GOBP-REGULATION-OF-BINDING                         | GO-0051098    | 11   | -0.328439 | -0.968896 | 0.506953  | 1.000000  | 1.000      |
| 519 | GOBP-ORGANONITROGEN-COMPOUND-BIOSYNTHETIC-PROCESS  | GO-1901566    | 13   | -0.315723 | -0.969156 | 0.484549  | 1.000000  | 1.000      |
| 520 | REACTOME-EPHLEPHRIN-SIGNALING                      | R-RNO-2682334 | 6    | -0.400443 | -0.971352 | 0.516039  | 1.000000  | 1.000      |
| 521 | GOBP-REGULATION-OF-CYTOSKELETON-ORGANIZATION       | GO-0051493    | 5    | -0.427073 | -0.977426 | 0.486448  | 1.000000  | 1.000      |
| 522 | REACTOME-NEGATIVE-REGULATION-OF-NMDA-RECEPTOR...   | R-HSA-961732  | 8    | -0.376003 | -0.978435 | 0.536521  | 1.000000  | 1.000      |
| 523 | GOBP-BEHAVIOR                                      | GO-0007610    | 33   | -0.264393 | -0.980150 | 0.498294  | 1.000000  | 1.000      |
| 524 | REACTOME-CIRCADIAN-CLOCK                           | R-HSA-400253  | 5    | -0.433735 | -0.987150 | 0.475728  | 1.000000  | 1.000      |
| 525 | GOBP-ORGANIC-ACID-METABOLIC-PROCESS                | GO-0006082    | 7    | -0.390932 | -0.988213 | 0.507483  | 1.000000  | 1.000      |
| 526 | GOBP-VESSICLE-MEDIATED-TRANSPORT-IN-SYNAPSE        | GO-0099003    | 7    | -0.389869 | -0.989298 | 0.490566  | 1.000000  | 1.000      |
| 527 | REACTOME-ASSEMBLY-AND-CELL-SURFACE-PRESENTATION... | R-RNO-9609736 | 8    | -0.376003 | -0.990208 | 0.492773  | 1.000000  | 1.000      |
| 528 | GOBP-MUSCLE-ORGAN-DEVELOPMENT                      | GO-0007517    | 9    | -0.365246 | -0.991137 | 0.494133  | 1.000000  | 1.000      |
| 529 | GOBP-REGULATION-OF-NERVOUS-SYSTEM-PROCESS          | GO-0031644    | 8    | -0.380000 | -0.992828 | 0.501971  | 1.000000  | 1.000      |
| 530 | GOBP-STRIATED-MUSCLE-CELL-DIFFERENTIATION          | GO-0051146    | 9    | -0.366495 | -0.992997 | 0.487248  | 1.000000  | 1.000      |
| 531 | GOBP-REGULATION-OF-CYTOSOLIC-CALCIUM-ION-CONCE...  | GO-0051480    | 13   | -0.328197 | -0.993102 | 0.480601  | 1.000000  | 1.000      |
| 532 | GOBP-CELL-GROWTH                                   | GO-0016049    | 10   | -0.352177 | -0.993878 | 0.484127  | 1.000000  | 1.000      |
| 533 | GOBP-POSITIVE-REGULATION-OF-CYSTEINE-TYPE-ENDO...  | GO-2001056    | 7    | -0.396678 | -0.996275 | 0.475661  | 1.000000  | 1.000      |
| 534 | GOBP-CALCIUM-MEDIATED-SIGNALING                    | GO-0019722    | 10   | -0.354972 | -1.004981 | 0.470361  | 1.000000  | 1.000      |
| 535 | GOBP-MUSCLE-ADAPTATION                             | GO-0043500    | 5    | -0.439943 | -1.005425 | 0.445714  | 1.000000  | 1.000      |
| 536 | GOBP-REGULATION-OF-MUSCLE-SYSTEM-PROCESS           | GO-0090257    | 8    | -0.379538 | -1.007587 | 0.451482  | 1.000000  | 1.000      |
| 537 | GOBP-DIVALENT-INORGANIC-CATION-HOMEOSTASIS         | GO-0072507    | 13   | -0.328197 | -1.007683 | 0.454545  | 1.000000  | 1.000      |
| 538 | GOBP-POSITIVE-REGULATION-OF-PEPTIDASE-ACTIVITY     | GO-0010952    | 7    | -0.396678 | -1.007808 | 0.454791  | 1.000000  | 1.000      |
| 539 | GOBP-CELLULAR-RESPONSE-TO-PEPTIDE-HORMONE-STIM...  | GO-0071375    | 9    | -0.371106 | -1.013165 | 0.485640  | 1.000000  | 1.000      |
| 540 | GOBP-NERVOUS-SYSTEM-PROCESS                        | GO-0050877    | 38   | -0.268632 | -1.014937 | 0.461197  | 1.000000  | 1.000      |
| 541 | GOBP-PEPTIDE-SECRETION                             | GO-0002790    | 9    | -0.369285 | -1.014989 | 0.445178  | 1.000000  | 1.000      |
| 542 | GOBP-REGULATION-OF-MUSCLE-ADAPTATION               | GO-0043502    | 5    | -0.439943 | -1.018549 | 0.421499  | 1.000000  | 1.000      |
| 543 | REACTOME-G-ALPHA-Q-SIGNALING-EVENTS                | R-RNO-416476  | 6    | -0.426040 | -1.021899 | 0.442441  | 1.000000  | 1.000      |
| 544 | GOBP-POSITIVE-REGULATION-OF-PROTEIN-SERINE-THR...  | GO-0071902    | 9    | -0.367061 | -1.023684 | 0.435762  | 1.000000  | 1.000      |
| 545 | GOBP-POSITIVE-REGULATION-OF-CATALYTIC-ACTIVITY     | GO-0043085    | 29   | -0.278673 | -1.024653 | 0.447545  | 1.000000  | 1.000      |
| 546 | GOBP-REGULATION-OF-HORMONE-SECRETION               | GO-0046883    | 8    | -0.380437 | -1.024964 | 0.448461  | 1.000000  | 1.000      |
| 547 | GOBP-POSTTRANSCRIPTIONAL-REGULATION-OF-GENE-EX...  | GO-0010608    | 8    | -0.389757 | -1.025261 | 0.446721  | 1.000000  | 1.000      |
| 548 | GOBP-CELLULAR-GLUCOSE-HOMEOSTASIS                  | GO-0001678    | 5    | -0.440349 | -1.025656 | 0.402878  | 1.000000  | 1.000      |
| 549 | GOBP-METAL-ION-TRANSPORT                           | GO-0030001    | 11   | -0.355398 | -1.025877 | 0.455458  | 1.000000  | 1.000      |
| 550 | GOBP-REGULATION-OF-SYNAPTIC-PLASTICITY             | GO-0048167    | 21   | -0.298522 | -1.026806 | 0.453237  | 1.000000  | 1.000      |
| 551 | GOBP-SMALL-MOLECULE-METABOLIC-PROCESS              | GO-0044281    | 16   | -0.317535 | -1.028401 | 0.444578  | 1.000000  | 1.000      |
| 552 | GOBP-RESPONSE-TO-ALKALOID                          | GO-0043279    | 5    | -0.445783 | -1.028599 | 0.410689  | 1.000000  | 1.000      |
| 553 | GOBP-MUSCLE-CONTRACTION                            | GO-0006936    | 5    | -0.459507 | -1.030296 | 0.426346  | 1.000000  | 1.000      |
| 554 | GOBP-CELL-CELL-SIGNALING-BY-WNT                    | GO-0198738    | 7    | -0.401564 | -1.030696 | 0.446575  | 1.000000  | 1.000      |
| 555 | REACTOME-CELL-CYCLE                                | R-RNO-1640170 | 6    | -0.432403 | -1.032565 | 0.432285  | 1.000000  | 1.000      |
| 556 | GOBP-POSITIVE-REGULATION-OF-ION-TRANSPORT          | GO-0043270    | 17   | -0.310225 | -1.032943 | 0.443800  | 1.000000  | 1.000      |

Continuation of Table S3

|     | NAME                                              | ID            | SIZE | ES        | NES       | NOM.p.val | FDR.q.val | FWER.p.val |
|-----|---------------------------------------------------|---------------|------|-----------|-----------|-----------|-----------|------------|
| 557 | GOBP-LONG-TERM-MEMORY                             | GO-0007616    | 6    | -0.425535 | -1.035336 | 0.434599  | 1.000000  | 1.000      |
| 558 | GOBP-REGULATION-OF-BODY-FLUID-LEVELS              | GO-0050878    | 11   | -0.354701 | -1.036344 | 0.434395  | 1.000000  | 1.000      |
| 559 | REACTOME-G-ALPHA-Z-SIGNALING-EVENTS               | R-RNO-418597  | 5    | -0.458829 | -1.036891 | 0.416431  | 1.000000  | 1.000      |
| 560 | GOBP-REGULATION-OF-ANION-TRANSPORT                | GO-0040470    | 20   | -0.302923 | -1.037633 | 0.421302  | 1.000000  | 1.000      |
| 561 | GOBP-RESPONSE-TO-KETONE                           | GO-1901654    | 7    | -0.416952 | -1.038390 | 0.424242  | 1.000000  | 1.000      |
| 562 | GOBP-PROTEIN-LOCALIZATION-TO-SYNAPSE              | GO-0035418    | 5    | -0.459578 | -1.040562 | 0.423188  | 1.000000  | 1.000      |
| 563 | REACTOME-VESICLE-MEDIATED-TRANSPORT               | R-RNO-5653656 | 5    | -0.456478 | -1.041515 | 0.397882  | 1.000000  | 1.000      |
| 564 | GOBP-PROTEIN-LOCALIZATION-TO-MEMBRANE             | GO-0042692    | 13   | -0.344106 | -1.041710 | 0.407814  | 1.000000  | 1.000      |
| 565 | GOBP-MUSCLE-CELL-DIFFERENTIATION                  | GO-0062322    | 10   | -0.369268 | -1.042064 | 0.410622  | 1.000000  | 1.000      |
| 566 | GOBP-HEAD-DEVELOPMENT                             | GO-0060322    | 23   | -0.296788 | -1.042362 | 0.434579  | 1.000000  | 1.000      |
| 567 | GOBP-ENDOCRINE-SYSTEM-DEVELOPMENT                 | GO-0035270    | 6    | -0.441807 | -1.043165 | 0.426982  | 1.000000  | 1.000      |
| 568 | GOBP-POSITIVE-REGULATION-OF-SYNAPTIC-TRANSMISSION | GO-0050806    | 15   | -0.324621 | -1.043242 | 0.419512  | 1.000000  | 1.000      |
| 569 | GOBP-TRANSMEMBRANE-TRAFFICKING                    | GO-0055085    | 27   | -0.293714 | -1.044387 | 0.408884  | 1.000000  | 1.000      |
| 570 | REACTOME-MEMBRANE-TRAFFICKING                     | R-RNO-199991  | 5    | -0.456478 | -1.046892 | 0.424242  | 1.000000  | 1.000      |
| 571 | GOBP-PROTEIN-LOCALIZATION-TO-POSTSYNAPSE          | GO-0062237    | 5    | -0.459578 | -1.050103 | 0.395480  | 1.000000  | 1.000      |
| 572 | GOBP-MONOCARBOXYLIC-ACID-METABOLIC-PROCESS        | GO-0032787    | 6    | -0.432593 | -1.050564 | 0.406944  | 1.000000  | 1.000      |
| 573 | GOBP-CALCIUM-ION-TRANSPORT                        | GO-0006816    | 11   | -0.353398 | -1.051212 | 0.394602  | 1.000000  | 1.000      |
| 574 | GOBP-POSITIVE-REGULATION-OF-MOLECULAR-FUNCTION    | GO-0044093    | 37   | -0.275335 | -1.051850 | 0.390190  | 1.000000  | 1.000      |
| 575 | GOBP-CENTRAL-NERVOUS-SYSTEM-DEVELOPMENT           | GO-0007417    | 27   | -0.293232 | -1.054910 | 0.401837  | 1.000000  | 1.000      |
| 576 | GOBP-REGULATION-OF-CELL-PROJECTION-ORGANIZATION   | GO-0031344    | 20   | -0.303989 | -1.055785 | 0.403129  | 1.000000  | 1.000      |
| 577 | GOBP-DENDRITIC-SPINE-DEVELOPMENT                  | GO-0060996    | 6    | -0.435566 | -1.059645 | 0.388418  | 1.000000  | 1.000      |
| 578 | REACTOME-BETA-CATENIN-INDEPENDENT-WNT-SIGNALING   | R-RNO-3858494 | 5    | -0.464338 | -1.059816 | 0.390244  | 1.000000  | 1.000      |
| 579 | GOBP-DENDRITIC-SPINE-MORPHOGENESIS                | GO-0060997    | 5    | -0.468418 | -1.060351 | 0.410587  | 1.000000  | 1.000      |
| 580 | GOBP-HORMONE-TRANSPORT                            | GO-0009914    | 9    | -0.385155 | -1.061188 | 0.407507  | 1.000000  | 1.000      |
| 581 | GOBP-REGULATION-OF-NEUROTRANSMITTER-TRANSPORT     | GO-0051588    | 6    | -0.437356 | -1.061976 | 0.393602  | 1.000000  | 1.000      |
| 582 | GOBP-REGULATION-OF-PEPTIDE-SECRETION              | GO-0002791    | 7    | -0.428562 | -1.069200 | 0.383448  | 1.000000  | 1.000      |
| 583 | GOBP-MULTICELLULAR-ORGANISM-REPRODUCTION          | GO-0032504    | 12   | -0.353999 | -1.066530 | 0.395379  | 1.000000  | 1.000      |
| 584 | GOBP-ENDOMEMBRANE-SYSTEM-ORGANIZATION             | GO-0010256    | 6    | -0.440212 | -1.070988 | 0.386301  | 1.000000  | 1.000      |
| 585 | GOBP-REGULATION-OF-SYSTEM-PROCESS                 | GO-0044057    | 18   | -0.326021 | -1.087235 | 0.349879  | 1.000000  | 1.000      |
| 586 | GOBP-REGULATION-OF-PEPTIDE-HORMONE-SECRETION      | GO-0090276    | 6    | -0.453527 | -1.089411 | 0.340845  | 1.000000  | 1.000      |
| 587 | GOBP-CELL-CYCLE                                   | GO-0007049    | 21   | -0.320869 | -1.090761 | 0.362884  | 1.000000  | 1.000      |
| 588 | GOBP-MUSCLE-SYSTEM-PROCESS                        | GO-0003012    | 9    | -0.399627 | -1.095387 | 0.350785  | 1.000000  | 1.000      |
| 589 | GOBP-MYELOID-LEUKOCYTE-ACTIVATION                 | GO-0002274    | 8    | -0.413495 | -1.096025 | 0.359211  | 1.000000  | 1.000      |
| 590 | GOBP-REGULATION-OF-CELLULAR-LOCALIZATION          | GO-0060341    | 17   | -0.336435 | -1.099643 | 0.354293  | 1.000000  | 1.000      |
| 591 | GOBP-NEGATIVE-REGULATION-OF-GENE-EXPRESSION       | GO-0010629    | 11   | -0.375249 | -1.102073 | 0.355082  | 1.000000  | 1.000      |
| 592 | GOBP-RESPONSE-TO-METAL-ION                        | GO-0010038    | 15   | -0.344561 | -1.103536 | 0.341104  | 1.000000  | 1.000      |
| 593 | GOBP-MUSCLE-CELL-DEVELOPMENT                      | GO-0055001    | 5    | -0.482136 | -1.104087 | 0.325037  | 1.000000  | 1.000      |
| 594 | REACTOME-LONG-TERM-POTENTIATION                   | R-HSA-9620244 | 10   | -0.387434 | -1.104610 | 0.346053  | 1.000000  | 1.000      |
| 595 | GOBP-REGULATION-OF-POSTSYNAPTIC-MEMBRANE-POTEN... | GO-0060078    | 14   | -0.353537 | -1.104734 | 0.336145  | 1.000000  | 1.000      |
| 596 | REACTOME-MAPK-FAMILY-SIGNALING-CASCADES           | R-RNO-5683057 | 12   | -0.370644 | -1.105365 | 0.338812  | 1.000000  | 1.000      |
| 597 | REACTOME-PTEN-REGULATION                          | R-RNO-6807070 | 5    | -0.487796 | -1.105616 | 0.332394  | 1.000000  | 1.000      |
| 598 | GOBP-NUCLEOBASE-CONTAINING-SMALL-MOLECULE-META... | GO-0055086    | 7    | -0.437991 | -1.106261 | 0.336634  | 1.000000  | 1.000      |
| 599 | REACTOME-NEUTROPHIL-DEGRANULATION                 | R-RNO-6798695 | 6    | -0.461177 | -1.114084 | 0.339489  | 1.000000  | 1.000      |

Continuation of Table S3

| NAME | ID                                                 | SIZE          | ES | NES       | NOM.p.val | FDR.q.val | FWER.p.val |
|------|----------------------------------------------------|---------------|----|-----------|-----------|-----------|------------|
| 600  | GOBP-MYELOID-LEUKOCYTE-MEDIATED-IMMUNITY           | GO-0002444    | 6  | -0.461177 | -1.119506 | 0.331915  | 1.000000   |
| 601  | GOBP-CELL_JUNCTION_ORGANIZATION                    | GO-0034330    | 19 | -0.337812 | -1.120207 | 0.320096  | 1.000000   |
| 602  | GOBP-GAMETE-GENERATION                             | GO-0007276    | 9  | -0.411991 | -1.121207 | 0.345997  | 1.000000   |
| 603  | GOBP-CELLULAR-ION-HOMEOSTASIS                      | GO-0006873    | 14 | -0.358165 | -1.123210 | 0.317897  | 1.000000   |
| 604  | GOBP-REGULATION-OF-SYNAPTIC-TRANSMISSION-GLUTA...  | GO-0051966    | 12 | -0.381041 | -1.124200 | 0.371132  | 1.000000   |
| 605  | REACTOME-TRAFFICKING-OF-GLUR2-CONTAINING-AMPA...   | R-RNO-416993  | 8  | -0.430031 | -1.126362 | 0.332414  | 1.000000   |
| 606  | GOBP-NEGATIVE-REGULATION-OF-CELL-CYCLE             | GO-0045786    | 5  | -0.492412 | -1.126754 | 0.288406  | 1.000000   |
| 607  | GOBP-CELLULAR-RESPONSE-TO-ALCOHOL                  | GO-0097306    | 5  | -0.493793 | -1.127890 | 0.309659  | 1.000000   |
| 608  | GOBP-REGULATION-OF-VESICLE-MEDIATED-TRANSPORT      | GO-0060627    | 12 | -0.370861 | -1.128881 | 0.316391  | 1.000000   |
| 609  | GOBP-CYTOSKELETON-ORGANIZATION                     | GO-0007010    | 11 | -0.376633 | -1.129941 | 0.304562  | 1.000000   |
| 610  | GOBP-PROTEIN-LOCALIZATION-TO-CELL-PERIPHERY        | GO-1990778    | 12 | -0.376633 | -1.129960 | 0.319255  | 1.000000   |
| 611  | GOBP-SENSORY-ORGAN-DEVELOPMENT                     | GO-0007423    | 8  | -0.427594 | -1.131100 | 0.311081  | 1.000000   |
| 612  | GOBP-POSITIVE-REGULATION-OF-SECRETION              | GO-0051047    | 6  | -0.464879 | -1.134765 | 0.314841  | 1.000000   |
| 613  | REACTOME-RNA-POLYMERASE-III-TRANSCRIPTION          | R-RNO-73857   | 20 | -0.333792 | -1.137549 | 0.301663  | 1.000000   |
| 614  | REACTOME-SIGNALING-BY-WNT                          | R-RNO-195721  | 7  | -0.454792 | -1.144613 | 0.303867  | 1.000000   |
| 615  | GOBP-POSITIVE-REGULATION-OF-PROTEIN-METABOLIC...   | GO-0051247    | 27 | -0.319058 | -1.145538 | 0.306620  | 1.000000   |
| 616  | GOBP-CELLULAR-LIPID-METABOLIC-PROCESS              | GO-0044255    | 7  | -0.451062 | -1.147858 | 0.296296  | 1.000000   |
| 617  | GOBP-CELL-ACTIVATION-INVOLVED-IN-IMMUNE-RESPONSE   | GO-0002263    | 7  | -0.461177 | -1.149319 | 0.289291  | 1.000000   |
| 618  | GOBP-CARBOHYDRATE-HOMEOSTASIS                      | GO-0033500    | 7  | -0.449946 | -1.152053 | 0.306430  | 1.000000   |
| 619  | REACTOME-CLASS-C-3-METABOTROPIC-GLUTAMATE-PHER...  | R-RNO-420499  | 7  | -0.448677 | -1.152288 | 0.288952  | 1.000000   |
| 620  | GOBP-REGULATION-OF-ORGANELLE-ORGANIZATION          | GO-0033043    | 14 | -0.363498 | -1.152732 | 0.280247  | 1.000000   |
| 621  | GOBP-CHEMICAL-HOMEOSTASIS                          | GO-0048878    | 23 | -0.330853 | -1.154995 | 0.288235  | 1.000000   |
| 622  | GOBP-LEARNING                                      | GO-0007612    | 13 | -0.376278 | -1.159820 | 0.276029  | 1.000000   |
| 623  | GOBP-REGULATION-OF-ENDOCYTOSIS                     | GO-0030100    | 6  | -0.473851 | -1.160275 | 0.280537  | 1.000000   |
| 624  | GOBP-CELL-SURFACE-RECEPTOR-SIGNALING-PATHWAY_I...  | GO-1905114    | 15 | -0.364596 | -1.164498 | 0.276775  | 1.000000   |
| 625  | GOBP-MITOCHONDRION-ORGANIZATION                    | GO-0007005    | 7  | -0.460814 | -1.170978 | 0.262948  | 1.000000   |
| 626  | REACTOME-RAS-ACTIVATION-UPON-CA2-INFLUX-THROUGH... | R-HSA-442982  | 6  | -0.487805 | -1.177339 | 0.251366  | 1.000000   |
| 627  | GOBP-SYNAPTIC-SIGNALING                            | GO-0099536    | 47 | -0.490797 | -1.178939 | 0.258602  | 1.000000   |
| 628  | GOBP-GLUCOSE-METABOLIC-PROCESS                     | GO-0006006    | 6  | -0.490797 | -1.180926 | 0.260388  | 1.000000   |
| 629  | GOBP-NUCLEAR-TRANSPORT                             | GO-0051169    | 5  | -0.511968 | -1.188470 | 0.252427  | 1.000000   |
| 630  | GOBP-CELLULAR-HOMEOSTASIS                          | GO-0019725    | 18 | -0.356988 | -1.190694 | 0.245983  | 1.000000   |
| 631  | GOBP-MONOSACCHARIDE-METABOLIC-PROCESS              | GO-0005996    | 6  | -0.490797 | -1.193563 | 0.248237  | 1.000000   |
| 632  | GOBP-NEUROTRANSMITTER-TRANSPORT                    | GO-0006836    | 7  | -0.477525 | -1.195238 | 0.244475  | 1.000000   |
| 633  | GOBP-REGULATION-OF-NEURONAL-SYNAPTIC-PLASTICITY    | GO-0048168    | 7  | -0.470940 | -1.204600 | 0.221477  | 1.000000   |
| 634  | GOBP-SECOND-MESSENGER-MEDIATED-SIGNALING           | GO-0019932    | 16 | -0.373197 | -1.211378 | 0.233633  | 1.000000   |
| 635  | GOBP-INTRACELLULAR-PROTEIN-TRANSPORT               | GO-0006886    | 8  | -0.460040 | -1.211394 | 0.210598  | 1.000000   |
| 636  | GOBP-POSITIVE-REGULATION-OF-ESTABLISHMENT-OF_P...  | GO-1904951    | 5  | -0.531804 | -1.212494 | 0.198847  | 1.000000   |
| 637  | GOBP-REGULATION-OF-NEUROTRANSMITTER-LEVELS         | GO-0001505    | 7  | -0.477525 | -1.212632 | 0.236016  | 1.000000   |
| 638  | GOBP-REGULATION-OF-MEMBRANE-POTENTIAL              | GO-0042391    | 17 | -0.367862 | -1.214250 | 0.222089  | 1.000000   |
| 639  | GOBP-CHEMICAL-SYNAPTIC-TRANSMISSION-POSTSYNAPTIC   | GO-0099565    | 9  | -0.444164 | -1.215004 | 0.241470  | 1.000000   |
| 640  | GOBP-POSITIVE-REGULATION-OF-CELLULAR-PROTEIN_L...  | GO-1903829    | 7  | -0.477525 | -1.223132 | 0.225585  | 1.000000   |
| 641  | GOBP-ENDOCYTOSIS                                   | GO-0006897    | 8  | -0.463492 | -1.224305 | 0.221622  | 1.000000   |
| 642  | REACTOME-NEUREXINS-AND-NEUROLIGINS                 | R-RNO-6794361 | 9  | -0.442768 | -1.225097 | 0.226078  | 1.000000   |

Continuation of Table S3

| NAME                                                  | ID            | SIZE | ES        | NES       | NOM.p.val | FDR.q.val | FWER.p.val |
|-------------------------------------------------------|---------------|------|-----------|-----------|-----------|-----------|------------|
| 643 GOBP-ESTABLISHMENT-OF-PROTEIN-LOCALIZATION        | GO-0045184    | 17   | -0.365777 | -1.230078 | 0.207108  | 1.000000  | 1.000      |
| 644 GOBP-NEGATIVE-REGULATION-OF-BINDING               | GO-0051100    | 6    | -0.511318 | -1.231544 | 0.199726  | 1.000000  | 1.000      |
| 645 GOBP-MALE-GAMETE-GENERATION                       | GO-0048232    | 5    | -0.542169 | -1.235283 | 0.207232  | 1.000000  | 1.000      |
| 646 REACTOME-CA-DEPENDENT-EVENTS                      | R-RNO-111996  | 8    | -0.462500 | -1.242206 | 0.198413  | 1.000000  | 1.000      |
| 647 GOBP-REGULATION-OF-SECRETION                      | GO-0051046    | 14   | -0.399329 | -1.244348 | 0.205000  | 1.000000  | 1.000      |
| 648 REACTOME-SIGNALING-BY-RHO-GTPASES-MIRO-GTPASES... | R-RNO-9716542 | 9    | -0.452156 | -1.247256 | 0.184000  | 1.000000  | 1.000      |
| 649 GOBP-POSITIVE-REGULATION-OF-SIGNALING             | GO-0023056    | 34   | -0.331306 | -1.247854 | 0.210465  | 1.000000  | 1.000      |
| 650 GOBP-RESPONSE-TO-ETHANOL                          | GO-0045471    | 5    | -0.548100 | -1.250737 | 0.193687  | 1.000000  | 1.000      |
| 651 GOBP-NEUROTRANSMITTER-SECRETION                   | GO-0007269    | 6    | -0.510490 | -1.250904 | 0.180617  | 1.000000  | 1.000      |
| 652 GOBP-DEPHOSPHORYLATION                            | GO-0016311    | 7    | -0.490047 | -1.251874 | 0.210235  | 1.000000  | 1.000      |
| 653 GOBP-SEXUAL-REPRODUCTION                          | GO-0019953    | 10   | -0.437601 | -1.253531 | 0.199741  | 1.000000  | 1.000      |
| 654 REACTOME-RHO-GTPASE-EFFECTORS                     | R-RNO-195258  | 9    | -0.452156 | -1.257324 | 0.187332  | 1.000000  | 1.000      |
| 655 GOBP-REGULATION-OF-PROTEIN-LOCALIZATION           | GO-0032880    | 18   | -0.377804 | -1.261681 | 0.191697  | 1.000000  | 1.000      |
| 656 GOBP-G-PROTEIN-COUPLED-GLUTAMATE-RECEPTOR-SIGN... | GO-0007216    | 8    | -0.477630 | -1.263065 | 0.165554  | 1.000000  | 1.000      |
| 657 REACTOME-INTRACELLULAR-SIGNALING-BY-SECOND-MES... | R-RNO-9006925 | 15   | -0.393939 | -1.264675 | 0.193827  | 1.000000  | 1.000      |
| 658 GOBP-CELLULAR-RESPONSE-TO-KETONE                  | GO-1901655    | 5    | -0.555812 | -1.268112 | 0.169034  | 1.000000  | 1.000      |
| 659 GOBP-POSTSYNAPSE-ORGANIZATION                     | GO-0009173    | 10   | -0.443231 | -1.270217 | 0.179183  | 1.000000  | 1.000      |
| 660 GOBP-PROTEIN-PHOSPHORYLATION                      | GO-0006470    | 7    | -0.490047 | -1.271305 | 0.162382  | 1.000000  | 1.000      |
| 661 REACTOME-TRAFFICKING-OF-AMPA-RECEPTORS            | R-RNO-399719  | 11   | -0.441558 | -1.274518 | 0.175796  | 1.000000  | 1.000      |
| 662 REACTOME-GPCR-LIGAND-BINDING                      | R-RNO-500792  | 8    | -0.476379 | -1.275162 | 0.177333  | 1.000000  | 1.000      |
| 663 REACTOME-TRANSCRIPTIONAL-REGULATION-BY-MECP2      | R-RNO-8986944 | 7    | -0.493827 | -1.276374 | 0.157895  | 1.000000  | 1.000      |
| 664 GOBP-NUCLEOSIDE-PHOSPHATE-BIOSYNTHETIC-PROCESS    | GO-1901293    | 5    | -0.565559 | -1.290962 | 0.156204  | 1.000000  | 1.000      |
| 665 GOBP-SYNAPTIC-TRANSMISSION-GLUTAMATERGIC          | GO-0035249    | 13   | -0.424684 | -1.291277 | 0.154135  | 1.000000  | 1.000      |
| 666 GOBP-REGULATION-OF-CELL-CYCLE-PROCESS             | GO-0010564    | 5    | -0.560271 | -1.292221 | 0.179379  | 1.000000  | 1.000      |
| 667 REACTOME-G-PROTEIN-MEDIATED-EVENTS                | R-RNO-112040  | 9    | -0.468354 | -1.298769 | 0.150063  | 1.000000  | 1.000      |
| 668 GOBP-ORGANOPHOSPHATE-BIOSYNTHETIC-PROCESS         | GO-0090407    | 5    | -0.565559 | -1.303493 | 0.120235  | 1.000000  | 1.000      |
| 669 GOBP-REGULATION-OF-TRANS-SYNAPTIC-SIGNALING       | GO-0009177    | 40   | -0.347238 | -1.307300 | 0.160398  | 1.000000  | 1.000      |
| 670 GOBP-SENSORY-PERCEPTION-OF-PAIN                   | GO-0019233    | 5    | -0.578313 | -1.313459 | 0.143917  | 1.000000  | 1.000      |
| 671 GOBP-REGULATION-OF-SYNAPSE-STRUCTURE-OR-ACTIVITY  | GO-0050803    | 11   | -0.450475 | -1.317153 | 0.141582  | 1.000000  | 1.000      |
| 672 REACTOME-UNBLOCKING-OF-NMDA-RECEPTORS-GLUTAMAT... | R-RNO-438066  | 12   | -0.446363 | -1.319514 | 0.144686  | 1.000000  | 1.000      |
| 673 GOBP-LOCOMOTORY-BEHAVIOR                          | GO-0007626    | 8    | -0.494504 | -1.323714 | 0.128631  | 1.000000  | 1.000      |
| 674 GOBP-SIGNAL-RELEASE                               | GO-0023061    | 14   | -0.424209 | -1.325561 | 0.145038  | 1.000000  | 1.000      |
| 675 GOBP-SYNAPSE-ORGANIZATION                         | GO-0050808    | 17   | -0.401657 | -1.326474 | 0.150188  | 1.000000  | 1.000      |
| 676 GOBP-ADENYLATE-CYCLASE-INHIBITING-G-PROTEIN.CO... | GO-0007196    | 5    | -0.580153 | -1.327959 | 0.130127  | 1.000000  | 1.000      |
| 677 GOBP-CELLULAR-COMPONENT-MAINTENANCE               | GO-0043954    | 5    | -0.587260 | -1.330923 | 0.128427  | 1.000000  | 1.000      |
| 678 GOBP-REGULATION-OF-CELLULAR-PROTEIN-LOCALIZATION  | GO-1903827    | 12   | -0.440384 | -1.333195 | 0.137056  | 1.000000  | 1.000      |
| 679 GOBP-LEUKOCYTE-MEDIATED-IMMUNITY                  | GO-0002443    | 8    | -0.494080 | -1.334947 | 0.123457  | 1.000000  | 1.000      |
| 680 REACTOME-CREB1-PHOSPHORYLATION-THROUGH-NMDA.RE... | R-RNO-442742  | 8    | -0.500000 | -1.352929 | 0.128134  | 1.000000  | 1.000      |
| 681 GOBP-MITOTIC-CELL-CYCLE                           | GO-0000278    | 10   | -0.482837 | -1.360933 | 0.118100  | 1.000000  | 1.000      |
| 682 GOBP-ADENYLATE-CYCLASE-INHIBITING-G-PROTEIN.CO... | GO-0007193    | 9    | -0.491023 | -1.367327 | 0.109354  | 1.000000  | 1.000      |
| 683 REACTOME-TRANSCRIPTIONAL-REGULATION-BY-TP53       | R-RNO-3700980 | 6    | -0.565151 | -1.375273 | 0.085135  | 1.000000  | 1.000      |
| 684 REACTOME-PROTEIN-PROTEIN-INTERACTIONS-AT-SYNAPSES | R-RNO-6794362 | 12   | -0.469600 | -1.379378 | 0.116834  | 1.000000  | 1.000      |
| 685 GOBP-RESPIRATORY-SYSTEM-DEVELOPMENT               | GO-0060541    | 6    | -0.574009 | -1.388704 | 0.097855  | 1.000000  | 1.000      |

Continuation of Table S3

| NAME | ID                                                | SIZE          | ES | NES       | NOM.p.val | FDR.q.val | FWER.p.val |
|------|---------------------------------------------------|---------------|----|-----------|-----------|-----------|------------|
| 686  | REACTOME_INTEGRATION_OF_ENERGY_METABOLISM         | R-RNO-103685  | 5  | -0.614458 | -1.389489 | 0.095791  | 1.000000   |
| 687  | GOBP_CELL_CELL_SIGNALING                          | GO-0007267    | 56 | -0.376284 | -1.403726 | 0.091620  | 1.000000   |
| 688  | GOBP_RESPONSE_TO_ALCOHOL                          | GO-0097305    | 11 | -0.486403 | -1.406502 | 0.063144  | 1.000000   |
| 689  | REACTOME_SYNAPTIC_ADHESION_LIKE_MOLECULES         | R-RNO-8849932 | 9  | -0.518656 | -1.408335 | 0.099596  | 1.000000   |
| 690  | GOBP_DENDRITE_DEVELOPMENT                         | GO-0016358    | 10 | -0.506783 | -1.414846 | 0.091731  | 1.000000   |
| 691  | GOBP_IONOTROPIC_GLUTAMATE_RECEPTOR_SIGNALING_P... | GO-0035235    | 9  | -0.520588 | -1.418908 | 0.095238  | 1.000000   |
| 692  | GOBP_CATION_TRANSPORT                             | GO-0006812    | 25 | -0.393409 | -1.421790 | 0.068525  | 1.000000   |
| 693  | GOBP_NEURON_PROJECTION_ORGANIZATION               | GO-0106027    | 8  | -0.535198 | -1.424414 | 0.097754  | 1.000000   |
| 694  | GOBP_CATION_TRANSMEMBRANE_TRANSPORT               | GO-0098655    | 18 | -0.426629 | -1.427653 | 0.085612  | 1.000000   |
| 695  | GOBP_MYOTUBE_DIFFERENTIATION                      | GO-0014902    | 5  | -0.635713 | -1.432647 | 0.093151  | 1.000000   |
| 696  | GOBP_REGULATION_OF_ION_TRANSPORT                  | GO-0043269    | 36 | -0.379300 | -1.434439 | 0.094145  | 1.000000   |
| 697  | GOBP_REGULATION_OF_TRANSMEMBRANE_TRANSPORT        | GO-0034762    | 23 | -0.409189 | -1.434890 | 0.082854  | 1.000000   |
| 698  | REACTOME_OPIOID_SIGNALING                         | R-RNO-111885  | 12 | -0.486842 | -1.450133 | 0.080051  | 1.000000   |
| 699  | GOBP_REGULATION_OF_PEP_TIDE_TRANSPORT             | GO-0090087    | 10 | -0.517736 | -1.458708 | 0.063211  | 1.000000   |
| 700  | REACTOME_ACTIVATION_OF_NMDA_RECEPTORS_AND_POST... | R-RNO-442755  | 16 | -0.458006 | -1.474546 | 0.062726  | 1.000000   |
| 701  | GOBP_REGULATION_OF_POSTSYNAPSE_ORGANIZATION       | GO-0099175    | 6  | -0.610022 | -1.500633 | 0.057103  | 1.000000   |
| 702  | GOBP_DENDRITE_MORPHOGENESIS                       | GO-0048813    | 7  | -0.587217 | -1.508011 | 0.042466  | 1.000000   |
| 703  | GOBP_ADENYLATE_CYCLASE_MODULATING_G_PROTEIN_CO... | GO-0007188    | 11 | -0.517337 | -1.509981 | 0.048346  | 1.000000   |
| 704  | REACTOME_NEUROTRANSMITTER_RECEPTORS_AND_POSTSY... | R-RNO-112314  | 22 | -0.456908 | -1.546301 | 0.025060  | 1.000000   |
| 705  | GOBP_REGULATION_OF_TRANSPORTER_ACTIVITY           | GO-0032409    | 17 | -0.466937 | -1.552568 | 0.032927  | 0.875311   |
| 706  | GOBP_CELL_CYCLE_PROCESS                           | GO-0022402    | 11 | -0.546612 | -1.584895 | 0.027379  | 0.735448   |
| 707  | REACTOME_SIGNALING_BY_GPCR                        | R-RNO-372790  | 22 | -0.457918 | -1.594328 | 0.033058  | 0.726802   |
| 708  | GOBP_GLUTAMATE_RECEPTOR_SIGNALING_PATHWAY         | GO-0007215    | 17 | -0.497391 | -1.611705 | 0.020910  | 0.679855   |
| 709  | GOBP_CELLULAR_MACROMOLECULE_LOCALIZATION          | GO-0070727    | 20 | -0.466129 | -1.617401 | 0.021557  | 0.693508   |
| 710  | GOBP_G_PROTEIN_COUPLED_RECEPTOR_SIGNALING_PATHWAY | GO-0007186    | 18 | -0.490504 | -1.625658 | 0.023370  | 0.697881   |
| 711  | GOBP_REGULATION_OF_CATION_TRANSMEMBRANE_TRANSPORT | GO-1904062    | 16 | -0.508995 | -1.629910 | 0.021066  | 0.724018   |
| 712  | GOBP_PROTEIN_COMPLEX_OLIGOMERIZATION              | GO-0051259    | 7  | -0.649794 | -1.652536 | 0.012195  | 0.656236   |
| 713  | GOBP_SENSORY_PERCEPTION                           | GO-0007600    | 9  | -0.607595 | -1.660205 | 0.014286  | 0.670151   |
| 714  | GOBP_REGULATION_OF_NMDA_RECEPTOR_ACTIVITY         | GO-2000310    | 10 | -0.584148 | -1.664863 | 0.020970  | 0.706904   |
| 715  | REACTOME_TRANSMISSION_ACROSS_CHEMICAL_SYNAPSES    | R-RNO-112315  | 23 | -0.467033 | -1.664978 | 0.018957  | 0.777070   |
| 716  | REACTOME_NEURONAL_SYSTEM                          | R-RNO-112316  | 26 | -0.466845 | -1.684079 | 0.010490  | 0.744275   |
| 717  | REACTOME_G_ALPHA_I_SIGNALING_EVENTS               | R-RNO-418594  | 18 | -0.512476 | -1.706904 | 0.019656  | 0.699389   |
| 718  | GOBP_PROTEIN_TETRAMERIZATION                      | GO-0051262    | 5  | -0.759258 | -1.739027 | 0.005690  | 0.613457   |
| 719  | GOBP_PROTEIN_CONTAINING_COMPLEX_SUBUNIT_ORGANI... | GO-0043933    | 15 | -0.566463 | -1.801572 | 0.006242  | 0.417409   |
| 720  | GOBP_ESTABLISHMENT_OF_PROTEIN_LOCALIZATION_TO...  | GO-0072594    | 5  | -0.789795 | -1.804116 | 0.004213  | 0.487702   |
| 721  | GOBP_PROTEIN_LOCALIZATION_TO_ORGANELLE            | GO-0033365    | 8  | -0.685173 | -1.823297 | 0.004104  | 0.519052   |
| 722  | GOBP_REGULATION_OF_SIGNALING_RECEPTOR_ACTIVITY    | GO-0010469    | 14 | -0.604349 | -1.873540 | 0.001211  | 0.431636   |
| 723  | GOBP_REGULATION_OF_CATION_CHANNEL_ACTIVITY        | GO-2001257    | 14 | -0.593628 | -1.873590 | 0.004950  | 0.647454   |
| 724  | GOBP_REGULATION_OF_NEUROTRANSMITTER_RECEPTOR_A... | GO-0099601    | 13 | -0.623822 | -1.920449 | 0.000000  | 0.800690   |

End of Table



**Supplementary Table S4: SC rostral segment late (45 DPL peak) profile GSEA results.**

| Begin of Table S4 |                                                    |               |      |          |          |           |           |            |  |
|-------------------|----------------------------------------------------|---------------|------|----------|----------|-----------|-----------|------------|--|
|                   | NAME                                               | ID            | SIZE | ES       | NES      | NOM.p.val | FDR.q.val | FWER.p.val |  |
| 0                 | GOBP-SYNAPTIC-SIGNALING                            | GO:0099536    | 47   | 0.579961 | 2.018370 | 0.001142  | 0.110040  | 0.101      |  |
| 1                 | GOBP-CELL-CELL-SIGNALING                           | GO:0007267    | 56   | 0.573256 | 2.007903 | 0.000000  | 0.064290  | 0.117      |  |
| 2                 | REACTOME-NEURONAL-SYSTEM                           | R-RNO-112316  | 26   | 0.594129 | 1.945261 | 0.000000  | 0.104607  | 0.267      |  |
| 3                 | GOBP-REGULATION-OF-TRANS-SYNAPTIC-SIGNALING        | GO:0099177    | 40   | 0.549315 | 1.942583 | 0.000000  | 0.081764  | 0.277      |  |
| 4                 | REACTOME-NEUROTRANSMITTER-RECEPTORS-AND-POSTSY...  | R-RNO-112314  | 22   | 0.582464 | 1.874906 | 0.003788  | 0.152251  | 0.520      |  |
| 5                 | REACTOME-TRANSMISSION-ACROSS-CHEMICAL-SYNAPSES     | R-RNO-112315  | 23   | 0.559181 | 1.809385 | 0.004878  | 0.268486  | 0.775      |  |
| 6                 | GOBP-G-PROTEIN-COUPLED-RECEPTOR-SIGNALING-PATHWAY  | GO:0007186    | 18   | 0.584833 | 1.792612 | 0.000000  | 0.279094  | 0.825      |  |
| 7                 | GOBP-POSITIVE-REGULATION-OF-TRANSMEMBRANE-TRAN...  | GO:0034764    | 7    | 0.742789 | 1.775269 | 0.001497  | 0.291396  | 0.877      |  |
| 8                 | GOBP-POSITIVE-REGULATION-OF-SIGNALING              | GO:0023056    | 34   | 0.483082 | 1.706538 | 0.008140  | 0.532927  | 0.985      |  |
| 9                 | GOBP-REGULATION-OF-TRANSPORT                       | GO:0051049    | 44   | 0.481413 | 1.691242 | 0.013953  | 0.551299  | 0.989      |  |
| 10                | GOBP-CHEMICAL-HOMEOSTASIS                          | GO:0048878    | 23   | 0.525372 | 1.685761 | 0.013580  | 0.527675  | 0.995      |  |
| 11                | GOBP-GLIOGENESIS                                   | GO:0042063    | 12   | 0.604378 | 1.678670 | 0.015805  | 0.512521  | 0.996      |  |
| 12                | REACTOME-DAG-AND-IP3-SIGNALING                     | R-RNO-1489509 | 8    | 0.686209 | 1.657882 | 0.011645  | 0.575414  | 1.000      |  |
| 13                | GOBP-CATION-TRANSPORT                              | GO:0006812    | 25   | 0.506346 | 1.648938 | 0.017348  | 0.573248  | 1.000      |  |
| 14                | REACTOME-ACTIVATION-OF-NMDA-RECEPTORS-AND-POST...  | R-RNO-442755  | 16   | 0.542285 | 1.647503 | 0.020888  | 0.541463  | 1.000      |  |
| 15                | GOBP-NEURON-DIFFERENTIATION                        | GO:0030182    | 37   | 0.475443 | 1.645604 | 0.012926  | 0.515312  | 1.000      |  |
| 16                | REACTOME-SIGNALING-BY-GPCR                         | R-RNO-372790  | 22   | 0.509412 | 1.644095 | 0.017789  | 0.491757  | 1.000      |  |
| 17                | GOBP-METAL-ION-HOMEOSTASIS                         | GO:0055065    | 14   | 0.562136 | 1.635932 | 0.015625  | 0.499041  | 1.000      |  |
| 18                | GOBP-REGULATION-OF-POSTSYNAPTIC-MEMBRANE-POTEN...  | GO:0060078    | 14   | 0.570756 | 1.633557 | 0.028683  | 0.481558  | 1.000      |  |
| 19                | GOBP-EPITHELIAL-CELL-DIFFERENTIATION               | GO:0030855    | 7    | 0.678777 | 1.623725 | 0.011940  | 0.47586   | 1.000      |  |
| 20                | GOBP-MAPK-CASCADE                                  | GO:0000165    | 18   | 0.534074 | 1.622645 | 0.021330  | 0.478529  | 1.000      |  |
| 21                | GOBP-VESICLE-MEDIATED-TRANSPORT-IN-SYNAPSE         | GO:0099003    | 7    | 0.686091 | 1.611744 | 0.016035  | 0.500597  | 1.000      |  |
| 22                | GOBP-NEURON-DEVELOPMENT                            | GO:0048666    | 34   | 0.464378 | 1.610901 | 0.024706  | 0.482076  | 1.000      |  |
| 23                | GOBP-ION-HOMEOSTASIS                               | GO:0050801    | 16   | 0.549220 | 1.609969 | 0.019430  | 0.466643  | 1.000      |  |
| 24                | GOBP-REGULATION-OF-NEUROTRANSMITTER-TRANSPORT      | GO:0051588    | 6    | 0.703024 | 1.606855 | 0.017699  | 0.459377  | 1.000      |  |
| 25                | GOBP-DIVALENT-INORGANIC-CATION-HOMEOSTASIS         | GO:0072507    | 13   | 0.569745 | 1.604588 | 0.026144  | 0.449745  | 1.000      |  |
| 26                | GOBP-REGULATION-OF-MEMBRANE-POTENTIAL              | GO:0042391    | 17   | 0.537767 | 1.602527 | 0.022251  | 0.440312  | 1.000      |  |
| 27                | GOBP-REGULATION-OF-CYTOSOLIC-CALCIUM-ION-CONCE...  | GO:0051480    | 13   | 0.569745 | 1.590337 | 0.028340  | 0.468599  | 1.000      |  |
| 28                | GOBP-CELLULAR-ION-HOMEOSTASIS                      | GO:0006873    | 14   | 0.546138 | 1.557727 | 0.036339  | 0.581443  | 1.000      |  |
| 29                | GOBP-PROTEIN-PHOSPHORYLATION                       | GO:0006468    | 33   | 0.454898 | 1.555198 | 0.026253  | 0.572667  | 1.000      |  |
| 30                | GOBP-REGULATION-OF-CIRCADIAN-RHYTHM                | GO:0042752    | 7    | 0.641028 | 1.549596 | 0.041298  | 0.577128  | 1.000      |  |
| 31                | GOBP-REGULATION-OF-SYNAPTIC-PLASTICITY             | GO:0048167    | 21   | 0.491107 | 1.535360 | 0.039390  | 0.623613  | 1.000      |  |
| 32                | GOBP-POSITIVE-REGULATION-OF-CATION-TRANSMEMBRAN... | GO:1904064    | 5    | 0.712489 | 1.531388 | 0.042813  | 0.623568  | 1.000      |  |
| 33                | REACTOME-TRAFFICKING-OF-AMPA-RECEPTORS             | R-RNO-399719  | 11   | 0.567396 | 1.523031 | 0.051842  | 0.642349  | 1.000      |  |
| 34                | GOBP-REGULATION-OF-ANION-TRANSMEMBRANE-TRANSPORT   | GO:1903959    | 5    | 0.722373 | 1.520107 | 0.039557  | 0.635747  | 1.000      |  |
| 35                | GOBP-REGULATION-OF-ION-TRANSPORT                   | GO:0043269    | 36   | 0.436332 | 1.503304 | 0.038005  | 0.696873  | 1.000      |  |
| 36                | GOBP-SIGNAL-RELEASE                                | GO:0023061    | 14   | 0.529178 | 1.502856 | 0.043709  | 0.680147  | 1.000      |  |
| 37                | GOBP-CELL-PROJECTION-ORGANIZATION                  | GO:0030030    | 35   | 0.428223 | 1.502620 | 0.042824  | 0.663185  | 1.000      |  |
| 38                | GOBP-PROTEIN-AUTOPHOSPHORYLATION                   | GO:0046777    | 5    | 0.698243 | 1.502291 | 0.034226  | 0.647679  | 1.000      |  |
| 39                | GOBP-GLUTAMATE-RECEPTOR-SIGNALING-PATHWAY          | GO:0007215    | 17   | 0.492958 | 1.501925 | 0.050378  | 0.632919  | 1.000      |  |
| 40                | GOBP-POSITIVE-REGULATION-OF-SYNAPTIC-TRANSMISSION  | GO:0050806    | 15   | 0.524178 | 1.498120 | 0.047493  | 0.632802  | 1.000      |  |

Continuation of Table S4

| NAME | ID                                                 | SIZE | ES       | NES      | NOM.p.val | FDR.q.val | FWER.p.val |
|------|----------------------------------------------------|------|----------|----------|-----------|-----------|------------|
| 41   | GOBP-NEUROGENESIS                                  | 41   | 0.424696 | 1.497123 | 0.056977  | 0.622551  | 1.000      |
| 42   | GOBP-POSITIVE-REGULATION-OF-LONG-TERM-SYNAPTIC...  | 5    | 0.708574 | 1.495042 | 0.039334  | 0.616362  | 1.000      |
| 43   | REACTOME-CA-DEPENDENT-EVENTS                       | 8    | 0.600000 | 1.490308 | 0.059972  | 0.622924  | 1.000      |
| 44   | GOBP-FORBRAIN-DEVELOPMENT                          | 10   | 0.59943  | 1.483596 | 0.055021  | 0.636809  | 1.000      |
| 45   | GOBP-REGULATION-OF-NEURON-PROJECTION-DEVELOPMENT   | 16   | 0.497489 | 1.477156 | 0.051813  | 0.650835  | 1.000      |
| 46   | REACTOME-G-PROTEIN-MEDIATED-EVENTS                 | 10   | 0.583518 | 1.474614 | 0.058156  | 0.647549  | 1.000      |
| 47   | GOBP-REGULATION-OF-SYNAPTIC-TRANSMISSION-GLUTA...  | 12   | 0.540506 | 1.474359 | 0.069930  | 0.634990  | 1.000      |
| 48   | REACTOME-G-ALPHA1-SIGNALING-EVENTS                 | 18   | 0.480973 | 1.470582 | 0.048114  | 0.638257  | 1.000      |
| 49   | GOBP-REGULATION-OF-NEUROTRANSMITTER-LEVELS         | 7    | 0.611760 | 1.459971 | 0.064706  | 0.698906  | 1.000      |
| 50   | GOBP-CATION-TRANSMEMBRANE-TRANSPORT                | 18   | 0.477400 | 1.455205 | 0.059585  | 0.676904  | 1.000      |
| 51   | GOBP-REGULATION-OF-LONG-TERM-SYNAPTIC-POTENTIAL... | 6    | 0.650541 | 1.454531 | 0.066971  | 0.666718  | 1.000      |
| 52   | HALLMARK-P13K-AKT-MTOR-SIGNALING                   | 5    | 0.631691 | 1.448507 | 0.079595  | 0.679976  | 1.000      |
| 53   | REACTOME-ANTIINFLAMMATORY-RESPONSEFAVOURING...     | 6    | 0.674785 | 1.445246 | 0.056782  | 0.681858  | 1.000      |
| 54   | GOBP-REGULATION-OF-MAPK-CASCADE                    | 13   | 0.508563 | 1.444475 | 0.081365  | 0.672951  | 1.000      |
| 55   | GOBP-NEGATIVE-REGULATION-OF-NEURON-DEATH           | 11   | 0.529470 | 1.441110 | 0.079167  | 0.674995  | 1.000      |
| 56   | GOBP-REGULATION-OF-CELL-PROJECTION-ORGANIZATION    | 20   | 0.462295 | 1.437908 | 0.063492  | 0.676172  | 1.000      |
| 57   | GOBP-SECRETION                                     | 24   | 0.443305 | 1.432622 | 0.067155  | 0.685987  | 1.000      |
| 58   | GOBP-ENDOCRINE-SYSTEM-DEVELOPMENT                  | 6    | 0.634596 | 1.428083 | 0.069630  | 0.693336  | 1.000      |
| 59   | GOBP-NEUROTRANSMITTER-TRANSPORT                    | 7    | 0.611760 | 1.426992 | 0.076923  | 0.685810  | 1.000      |
| 60   | GOBP-LONG-TERM-SYNAPTIC-POTENTIATION               | 12   | 0.501933 | 1.418136 | 0.099440  | 0.712403  | 1.000      |
| 61   | GOBP-DENDRITIC-SPINE-DEVELOPMENT                   | 6    | 0.641713 | 1.417268 | 0.071429  | 0.704022  | 1.000      |
| 62   | GOBP-POSITIVE-REGULATION-OF-TRANSPERASE-ACTIVITY   | 19   | 0.457771 | 1.415556 | 0.082310  | 0.700072  | 1.000      |
| 63   | GOBP-REGULATION-OF-NEUROTRANSMITTER-RECEPTOR-A...  | 13   | 0.493333 | 1.411806 | 0.088235  | 0.704203  | 1.000      |
| 64   | GOBP-SYNAPTIC-TRANSMISSION-GLUTAMATERGIC           | 13   | 0.497764 | 1.408940 | 0.100134  | 0.704999  | 1.000      |
| 65   | GOBP-EMBRYO-DEVELOPMENT                            | 14   | 0.493873 | 1.405106 | 0.094315  | 0.710393  | 1.000      |
| 66   | REACTOME-PROTEIN-PROTEIN-INTERACTIONS-AT-SYNAPSES  | 12   | 0.503261 | 1.404700 | 0.088742  | 0.701685  | 1.000      |
| 67   | GOBP-NEUROTRANSMITTER-SECRETION                    | 6    | 0.623782 | 1.398775 | 0.087021  | 0.715529  | 1.000      |
| 68   | REACTOME-UNBLOCKING-OF-NMDA-RECEPTORS-GLUTAMAT...  | 12   | 0.501524 | 1.397337 | 0.095041  | 0.710650  | 1.000      |
| 69   | GOBP-REGULATION-OF-SYNAPSE-STRUCTURE-OR-ACTIVITY   | 11   | 0.514527 | 1.395172 | 0.091160  | 0.709182  | 1.000      |
| 70   | GOBP-PROTEIN-KINASE-B-SIGNALING                    | 6    | 0.608340 | 1.390999 | 0.072485  | 0.716416  | 1.000      |
| 71   | GOBP-NEURON-PROJECTION-ORGANIZATION                | 8    | 0.554762 | 1.385954 | 0.102962  | 0.727270  | 1.000      |
| 72   | GOBP-HOMEOSTATIC-PROCESS                           | 31   | 0.407834 | 1.383536 | 0.109785  | 0.727190  | 1.000      |
| 73   | GOBP-POSITIVE-REGULATION-OF-PHOSPHORUS-METABOL...  | 23   | 0.428263 | 1.383436 | 0.087871  | 0.717900  | 1.000      |
| 74   | GOBP-INTRACELLULAR-PROTEIN-TRANSPORT               | 8    | 0.563900 | 1.383387 | 0.092725  | 0.708518  | 1.000      |
| 75   | GOBP-DNA-METABOLIC-PROCESS                         | 6    | 0.603794 | 1.380114 | 0.106782  | 0.712272  | 1.000      |
| 76   | GOBP-POSITIVE-REGULATION-OF-TRANSPORT              | 26   | 0.418634 | 1.379564 | 0.092121  | 0.705358  | 1.000      |
| 77   | GOBP-FATTY-ACID-TRANSPORT                          | 6    | 0.613403 | 1.375902 | 0.096296  | 0.710335  | 1.000      |
| 78   | GOBP-REGULATION-OF-METAL-ION-TRANSPORT             | 6    | 0.613403 | 1.375902 | 0.096296  | 0.710335  | 1.000      |
| 79   | REACTOME-OPIOID-SIGNALING                          | 12   | 0.505538 | 1.373717 | 0.117881  | 0.701432  | 1.000      |
| 80   | GOBP-EMBRYO-DEVELOPMENT-ENDING-IN-BIRTH-OR-EGG...  | 9    | 0.541671 | 1.373420 | 0.096206  | 0.693914  | 1.000      |
| 81   | GOBP-MEMBRANE-ORGANIZATION                         | 12   | 0.497731 | 1.369614 | 0.115127  | 0.700429  | 1.000      |
| 82   | GOBP-CELLULAR-HOMEOSTASIS                          | 18   | 0.446059 | 1.366585 | 0.108005  | 0.703142  | 1.000      |
| 83   | GOBP-DEVELOPMENTAL-MATURATION                      | 5    | 0.639807 | 1.363756 | 0.088647  | 0.705808  | 1.000      |

Continuation of Table S4

| NAME | ID                                                | SIZE | ES       | NES      | NOM.p.val | FDR.q.val | FWER.p.val |
|------|---------------------------------------------------|------|----------|----------|-----------|-----------|------------|
| 84   | GOBP-REGULATION-OF-CATION-TRANSMEMBRANE-TRANSPORT | 16   | 0.459204 | 1.360986 | 0.108639  | 0.707809  | 1.000      |
| 85   | GOBP-REGULATION-OF-CELLULAR-COMPONENT_SIZE        | 7    | 0.582271 | 1.360645 | 0.108470  | 0.700857  | 1.000      |
| 86   | GOBP-RECEPTOR-MEDIATED-ENDOCYTOSIS                | 6    | 0.610298 | 1.360455 | 0.111278  | 0.693533  | 1.000      |
| 87   | GOBP-NERVOUS-SYSTEM-PROCESS                       | 38   | 0.391443 | 1.354058 | 0.119952  | 0.709812  | 1.000      |
| 88   | GOBP-INTRACELLULAR-TRANSPORT                      | 10   | 0.517764 | 1.345684 | 0.127778  | 0.733854  | 1.000      |
| 89   | GOBP-GLIAL-CELL-DIFFERENTIATION                   | 10   | 0.512735 | 1.343954 | 0.128671  | 0.732435  | 1.000      |
| 90   | GOBP-REGULATION-OF-SECRETION                      | 14   | 0.464158 | 1.343068 | 0.140000  | 0.727919  | 1.000      |
| 91   | GOBP-PROTEIN-LOCALIZATION-TO-MEMBRANE             | 13   | 0.475718 | 1.334250 | 0.131169  | 0.753535  | 1.000      |
| 92   | GOBP-MAINTENANCE-OF-LOCATION                      | 7    | 0.564066 | 1.334043 | 0.147661  | 0.746349  | 1.000      |
| 93   | REACTOME-DISEASES-OF-SIGNAL-TRANSDUCTION-BY_GR... | 12   | 0.491715 | 1.330985 | 0.128205  | 0.750687  | 1.000      |
| 94   | GOBP-BEHAVIOR                                     | 33   | 0.389457 | 1.323750 | 0.132544  | 0.771390  | 1.000      |
| 95   | REACTOME-LONG-TERM-POTENTIATION                   | 10   | 0.508939 | 1.323673 | 0.148611  | 0.763622  | 1.000      |
| 96   | GOBP-ANION-TRANSMEMBRANE-TRANSPORT                | 7    | 0.568040 | 1.323154 | 0.127168  | 0.757683  | 1.000      |
| 97   | GOBP-CELLULAR-RESPONSE-TO-PEPTIDE                 | 13   | 0.476672 | 1.323139 | 0.148344  | 0.750026  | 1.000      |
| 98   | GOBP-ORGANIC-ACID-TRANSPORT                       | 7    | 0.558650 | 1.322334 | 0.140173  | 0.745305  | 1.000      |
| 99   | GOBP-REGULATION-OF-INTRACELLULAR-SIGNAL-TRANSD... | 21   | 0.422217 | 1.321694 | 0.141772  | 0.740270  | 1.000      |
| 100  | GOBP-RECEPTOR-INTERNALIZATION                     | 5    | 0.620759 | 1.321207 | 0.143082  | 0.734710  | 1.000      |
| 101  | GOBP-AMIDE-BIOSYNTHETIC-PROCESS                   | 6    | 0.591841 | 1.318286 | 0.128130  | 0.738419  | 1.000      |
| 102  | GOBP-POSITIVE-REGULATION-OF-PROTEIN-PHOSPHORYL... | 22   | 0.406778 | 1.318069 | 0.130923  | 0.731984  | 1.000      |
| 103  | GOBP-POSITIVE-REGULATION-OF-PROTEIN-KINASE-ACT... | 18   | 0.435455 | 1.316417 | 0.149808  | 0.731421  | 1.000      |
| 104  | GOBP-REGULATION-OF-ANATOMICAL-STRUCTURE-SIZE      | 10   | 0.500570 | 1.316354 | 0.155525  | 0.724622  | 1.000      |
| 105  | REACTOME-NEUREXINS-AND-NEUROLIGINS                | 9    | 0.520212 | 1.314834 | 0.152661  | 0.723479  | 1.000      |
| 106  | GOBP-PEPTIDE-BIOSYNTHETIC-PROCESS                 | 6    | 0.591841 | 1.314536 | 0.151468  | 0.717611  | 1.000      |
| 107  | GOBP-TELENCEPHALON-DEVELOPMENT                    | 7    | 0.560174 | 1.312849 | 0.136364  | 0.716742  | 1.000      |
| 108  | GOBP-POSITIVE-REGULATION-OF-PROTEIN-MODIFICATI... | 22   | 0.406778 | 1.310951 | 0.132242  | 0.716793  | 1.000      |
| 109  | GOBP-RESPONSE-TO-HEAT                             | 7    | 0.549858 | 1.310516 | 0.153509  | 0.711925  | 1.000      |
| 110  | GOBP-LOCOMOTORY-BEHAVIOR                          | 8    | 0.516631 | 1.306170 | 0.152661  | 0.721032  | 1.000      |
| 111  | GOBP-POSITIVE-REGULATION-OF-PROTEIN-TYROSINE-K... | 5    | 0.617877 | 1.304195 | 0.137255  | 0.721372  | 1.000      |
| 112  | REACTOME-CREB1-PHOSPHORYLATION-THROUGH-NMDA-RE... | 8    | 0.539183 | 1.300960 | 0.146240  | 0.726313  | 1.000      |
| 113  | GOBP-REGULATION-OF-PROTEIN-TYROSINE-KINASE-ACT... | 5    | 0.617877 | 1.300480 | 0.134884  | 0.721783  | 1.000      |
| 114  | REACTOME-INTRACELLULAR-SIGNALING-BY-SECOND-MES... | 15   | 0.454645 | 1.297759 | 0.174373  | 0.725626  | 1.000      |
| 115  | GOBP-RECEPTOR-METABOLIC-PROCESS                   | 5    | 0.620759 | 1.296794 | 0.152239  | 0.722572  | 1.000      |
| 116  | GOBP-CELLULAR-RESPONSE-TO-PEPTIDE-HORMONE-STIM... | 9    | 0.505660 | 1.295991 | 0.158996  | 0.719248  | 1.000      |
| 117  | GOBP-CELLULAR-RESPONSE-TO-KETONE                  | 5    | 0.616481 | 1.291990 | 0.154671  | 0.727216  | 1.000      |
| 118  | REACTOME-TRAFFICKING-OF-GLUR2-CONTAINING-AMPA-... | 8    | 0.525000 | 1.289915 | 0.156835  | 0.731842  | 1.000      |
| 119  | GOBP-CELLULAR-CARBOHYDRATE-METABOLIC-PROCESS      | 5    | 0.610153 | 1.284127 | 0.170659  | 0.742307  | 1.000      |
| 120  | GOBP-MULTICELLULAR-ORGANISMAL-RESPONSE-TO-STRESS  | 5    | 0.609690 | 1.283818 | 0.164274  | 0.737240  | 1.000      |
| 121  | GOBP-INORGANIC-ION-TRANSMEMBRANE-TRANSPORT        | 9    | 0.507767 | 1.283019 | 0.175732  | 0.733839  | 1.000      |
| 122  | REACTOME-RAS-ACTIVATION-UPON-CA2-INFLUX-THROUG... | 6    | 0.559221 | 1.280167 | 0.183976  | 0.737928  | 1.000      |
| 123  | GOBP-REGULATION-OF-CELLULAR-RESPONSE-TO-STRESS    | 9    | 0.508009 | 1.277486 | 0.170270  | 0.741338  | 1.000      |
| 124  | REACTOME-HEMOSTASIS                               | 14   | 0.437739 | 1.276463 | 0.188602  | 0.738982  | 1.000      |
| 125  | GOBP-CELLULAR-MACROMOLECULE-CATABOLIC-PROCESS     | 5    | 0.602410 | 1.275100 | 0.176012  | 0.738070  | 1.000      |
| 126  | GOBP-DENDRITIC-SPINE-MORPHOGENESIS                | 5    | 0.603090 | 1.275074 | 0.158879  | 0.732388  | 1.000      |

Continuation of Table S4

|     | NAME                                              | ID            | SIZE | ES       | NES      | NOM.p.val | FDR.q.val | FWER.p.val |
|-----|---------------------------------------------------|---------------|------|----------|----------|-----------|-----------|------------|
| 127 | GOBP-DENDRITE-DEVELOPMENT                         | GO-0016358    | 10   | 0.482082 | 1.272149 | 0.176634  | 0.736172  | 1.000      |
| 128 | GOBP-POSITIVE-REGULATION-OF-MAPK-CASCADE          | GO-0043410    | 9    | 0.497392 | 1.271583 | 0.180441  | 0.732556  | 1.000      |
| 129 | GOBP-POSITIVE-REGULATION-OF-PEPTIDYL-TYROSINE...  | GO-0050731    | 8    | 0.514072 | 1.271141 | 0.182584  | 0.728341  | 1.000      |
| 130 | GOBP-GENERATION-OF-PRECURSOR-METABOLITES-AND-E... | GO-0060691    | 5    | 0.580669 | 1.270828 | 0.189655  | 0.723808  | 1.000      |
| 131 | GOBP-CELL-SURFACE-RECEPTOR-SIGNALING-PATHWAY-I... | GO-1905114    | 15   | 0.435118 | 1.269584 | 0.161125  | 0.722606  | 1.000      |
| 132 | GOBP-PEPTIDYL-TYROSINE-MODIFICATION               | GO-0018212    | 10   | 0.486489 | 1.269439 | 0.186080  | 0.717651  | 1.000      |
| 133 | REACTOME-G-ALPHA-Z-SIGNALING-EVENTS               | R-RNO-418597  | 5    | 0.602859 | 1.267927 | 0.152568  | 0.717230  | 1.000      |
| 134 | REACTOME-GPCR-LIGAND-BINDING                      | R-RNO-500792  | 8    | 0.510051 | 1.265641 | 0.187675  | 0.719279  | 1.000      |
| 135 | GOBP-POLYSACCHARIDE-METABOLIC-PROCESS             | GO-0005976    | 5    | 0.607272 | 1.264903 | 0.158209  | 0.716380  | 1.000      |
| 136 | GOBP-RESPONSE-TO-OXYGEN-LEVELS                    | GO-0070482    | 8    | 0.515302 | 1.263274 | 0.172414  | 0.716545  | 1.000      |
| 137 | GOBP-REGULATION-OF-CATION-CHANNEL-ACTIVITY        | GO-2001257    | 14   | 0.441079 | 1.261669 | 0.170410  | 0.716605  | 1.000      |
| 138 | GOBP-POSITIVE-REGULATION-OF-PROTEIN-SERINE-THR... | GO-0071902    | 5    | 0.494234 | 1.261106 | 0.196676  | 0.713260  | 1.000      |
| 139 | GOBP-REGULATION-OF-CELL-CYCLE-PROCESS             | GO-0010564    | 5    | 0.594825 | 1.253227 | 0.188940  | 0.733618  | 1.000      |
| 140 | GOBP-REGULATION-OF-VESICLE-MEDIATED-TRANSPORT     | GO-0060627    | 12   | 0.454150 | 1.252509 | 0.195448  | 0.730799  | 1.000      |
| 141 | GOBP-METAL-ION-TRANSPORT                          | GO-0030001    | 11   | 0.464498 | 1.252133 | 0.182306  | 0.726764  | 1.000      |
| 142 | GOBP-CALCIUM-ION-TRANSPORT                        | GO-0006816    | 11   | 0.464498 | 1.248122 | 0.195418  | 0.734911  | 1.000      |
| 143 | GOBP-REGULATION-OF-NMDA-RECEPTOR-ACTIVITY         | GO-2000310    | 10   | 0.477212 | 1.246781 | 0.195155  | 0.734046  | 1.000      |
| 144 | GOBP-SYNAPSE-ORGANIZATION                         | GO-0050808    | 17   | 0.419689 | 1.245985 | 0.211068  | 0.731638  | 1.000      |
| 145 | GOBP-G-PROTEIN-COUPLED-GLUTAMATE-RECEPTOR-SIGN... | GO-0007216    | 8    | 0.503567 | 1.243015 | 0.196078  | 0.736440  | 1.000      |
| 146 | GOBP-CARBOHYDRATE-DERIVATIVE-BIOSYNTHETIC-PROCESS | GO-1901137    | 5    | 0.589478 | 1.238245 | 0.200949  | 0.746510  | 1.000      |
| 147 | REACTOME-ASSEMBLY-AND-CELL-SURFACE-PRESENTATIO... | R-RNO-9609736 | 8    | 0.504520 | 1.237577 | 0.204986  | 0.744476  | 1.000      |
| 148 | GOBP-HOMEOSTASIS-OF-NUMBER-OF-CELLS               | GO-0048872    | 5    | 0.573973 | 1.237131 | 0.197819  | 0.739995  | 1.000      |
| 149 | REACTOME-NEGATIVE-REGULATION-OF-NMDA-RECEPTOR...  | R-HSA-9617324 | 8    | 0.504520 | 1.236479 | 0.204578  | 0.736964  | 1.000      |
| 150 | GOBP-PROTEIN-LOCALIZATION-TO-PLASMA-MEMBRANE      | GO-0072659    | 7    | 0.529955 | 1.236350 | 0.235211  | 0.732559  | 1.000      |
| 151 | GOBP-TRANSMEMBRANE-TRANSPORT                      | GO-0055085    | 27   | 0.365599 | 1.234274 | 0.219927  | 0.734088  | 1.000      |
| 152 | GOBP-RESPONSE-TO-NERVE-GROWTH-FACTOR              | GO-1990089    | 7    | 0.519358 | 1.233172 | 0.212950  | 0.732638  | 1.000      |
| 153 | GOBP-REGULATION-OF-SIGNALING-RECEPTOR-ACTIVITY    | GO-0010469    | 14   | 0.431773 | 1.233082 | 0.205094  | 0.728168  | 1.000      |
| 154 | REACTOME-CELL-CYCLE-MITOTIC                       | R-RNO-69278   | 5    | 0.578313 | 1.221772 | 0.221169  | 0.759163  | 1.000      |
| 155 | GOBP-LEUKOCYTE-MIGRATION                          | GO-0050900    | 6    | 0.539314 | 1.216719 | 0.217325  | 0.769892  | 1.000      |
| 156 | REACTOME-CELL-CYCLE                               | R-RNO-1640170 | 6    | 0.539383 | 1.214278 | 0.213043  | 0.772589  | 1.000      |
| 157 | GOBP-POSITIVE-REGULATION-OF-EPITHELIAL-CELL-MI... | GO-0010634    | 5    | 0.574039 | 1.207091 | 0.251149  | 0.791010  | 1.000      |
| 158 | GOBP-REGULATION-OF-RECEPTOR-MEDIATED-ENDOCYTOSIS  | GO-0048259    | 5    | 0.577510 | 1.206497 | 0.250789  | 0.788136  | 1.000      |
| 159 | REACTOME-SIGNALING-BY-WNT                         | R-RNO-195721  | 7    | 0.506173 | 1.206333 | 0.243590  | 0.783780  | 1.000      |
| 160 | GOBP-CHEMICAL-SYNAPTIC-TRANSMISSION_POSTSYNAPTIC  | GO-0099565    | 9    | 0.471181 | 1.205457 | 0.235955  | 0.781809  | 1.000      |
| 161 | GOBP-REGULATION-OF-CELL-CELL-ADHESION             | GO-0022407    | 9    | 0.472497 | 1.205031 | 0.239456  | 0.778373  | 1.000      |
| 162 | GOBP-ORGANOPHOSPHATE-BIOSYNTHETIC-PROCESS         | GO-0090407    | 5    | 0.548784 | 1.204295 | 0.228788  | 0.776065  | 1.000      |
| 163 | REACTOME-SYNAPTIC-ADHESION-LIKE-MOLECULES         | R-RNO-8849932 | 9    | 0.468354 | 1.202595 | 0.246238  | 0.776761  | 1.000      |
| 164 | GOBP-MONOCARBOXYLIC-ACID-TRANSPORT                | GO-0015718    | 5    | 0.553897 | 1.195709 | 0.264970  | 0.794178  | 1.000      |
| 165 | GOBP-REGULATION-OF-PHOSPHOLIPASE-C-ACTIVITY       | GO-1900274    | 5    | 0.557106 | 1.195374 | 0.230061  | 0.790660  | 1.000      |
| 166 | HALLMARK-ALLOGRAFT-REJECTION                      | M5950         | 7    | 0.513553 | 1.195126 | 0.250737  | 0.786618  | 1.000      |
| 167 | GOBP-IONOTROPIC-GLUTAMATE-RECEPTOR-SIGNALING-P... | GO-0035235    | 9    | 0.468354 | 1.193073 | 0.235616  | 0.788203  | 1.000      |
| 168 | GOBP-PROTEIN-LOCALIZATION-TO-CELL-PERIPHERY       | GO-1990778    | 12   | 0.433173 | 1.189817 | 0.268358  | 0.793923  | 1.000      |
| 169 | GOBP-REGULATION-OF-RESPONSE-TO-STRESS             | GO-0080134    | 19   | 0.381756 | 1.188860 | 0.249354  | 0.792258  | 1.000      |

Continuation of Table S4

| NAME | ID                                                | SIZE | ES       | NES      | NOM.p.val | FDR.q.val | FWER.p.val |
|------|---------------------------------------------------|------|----------|----------|-----------|-----------|------------|
| 170  | GOBP-REGULATION-OF-TRANSFERASE-ACTIVITY           | 21   | 0.367372 | 1.185726 | 0.249357  | 0.797990  | 1.000      |
| 171  | GOBP-REGULATION-OF-CELLULAR-AMIDE-METABOLIC-PR... | 9    | 0.471808 | 1.184840 | 0.270604  | 0.796164  | 1.000      |
| 172  | GOBP-POSTTRANSCRIPTIONAL-REGULATION-OF-GENE-EX... | 8    | 0.477916 | 1.183684 | 0.251788  | 0.795305  | 1.000      |
| 173  | GOBP-ADENYLATE-CYCLASE-MODULATING-G-PROTEIN-CO... | 11   | 0.435822 | 1.183207 | 0.271117  | 0.792168  | 1.000      |
| 174  | GOBP-HORMONE-TRANSPORT                            | 9    | 0.463124 | 1.181749 | 0.249645  | 0.792226  | 1.000      |
| 175  | REACTOME-PLATELET-ACTIVATION-SIGNALING-AND-AGG... | 7    | 0.497009 | 1.179868 | 0.236417  | 0.793585  | 1.000      |
| 176  | GOBP-POSTSYNAPSE-ORGANIZATION                     | 10   | 0.449413 | 1.178675 | 0.267930  | 0.792805  | 1.000      |
| 177  | REACTOME-ADAPTIVE-IMMUNE-SYSTEM                   | 9    | 0.460450 | 1.177702 | 0.263523  | 0.791374  | 1.000      |
| 178  | GOBP-NEGATIVE-REGULATION-OF-CELLULAR-COMPONENT... | 11   | 0.428419 | 1.176470 | 0.279778  | 0.790660  | 1.000      |
| 179  | REACTOME-INTEGRATION-OF-ENERGY-METABOLISM         | 5    | 0.561380 | 1.172774 | 0.270016  | 0.797194  | 1.000      |
| 180  | GOBP-NUCLEOSIDE-PHOSPHATE-BIOSYNTHETIC-PROCESS    | 5    | 0.549784 | 1.171665 | 0.258114  | 0.796059  | 1.000      |
| 181  | GOBP-EPITHELIAL-DEVELOPMENT                       | 15   | 0.396540 | 1.169844 | 0.272727  | 0.796939  | 1.000      |
| 182  | GOBP-POSITIVE-REGULATION-OF-CATALYTIC-ACTIVITY    | 29   | 0.342752 | 1.168338 | 0.280095  | 0.797170  | 1.000      |
| 183  | GOBP-ACIDIC-AMINO-ACID-TRANSPORT                  | 5    | 0.553897 | 1.165902 | 0.266568  | 0.800249  | 1.000      |
| 184  | GOBP-NEGATIVE-REGULATION-OF-NEURON-APOPTOTIC-P... | 8    | 0.478864 | 1.163851 | 0.284900  | 0.796056  | 1.000      |
| 185  | GOBP-POSITIVE-REGULATION-OF-LIPASE-ACTIVITY       | 5    | 0.557106 | 1.164667 | 0.267647  | 0.795199  | 1.000      |
| 186  | GOBP-REGULATION-OF-PROTEIN-PHOSPHORYLATION        | 25   | 0.353012 | 1.164341 | 0.297899  | 0.791923  | 1.000      |
| 187  | REACTOME-INTERFERON-SIGNALING                     | 6    | 0.521953 | 1.163054 | 0.273121  | 0.791801  | 1.000      |
| 188  | GOBP-SECOND-MESSENGER-MEDIATED-SIGNALING          | 16   | 0.386272 | 1.162848 | 0.286632  | 0.788203  | 1.000      |
| 189  | GOBP-PROTEIN-LOCALIZATION-TO-SYNAPSE              | 5    | 0.547774 | 1.162813 | 0.275148  | 0.784141  | 1.000      |
| 190  | GOBP-REGULATION-OF-PROTEIN-KINASE-ACTIVITY        | 21   | 0.367372 | 1.161385 | 0.282828  | 0.784599  | 1.000      |
| 191  | GOBP-LIPID-LOCALIZATION                           | 10   | 0.444690 | 1.160056 | 0.279673  | 0.784614  | 1.000      |
| 192  | GOBP-ENDOMEMBRANE-SYSTEM-ORGANIZATION             | 6    | 0.504932 | 1.158611 | 0.302256  | 0.784914  | 1.000      |
| 193  | GOBP-DICARBOXYLIC-ACID-TRANSPORT                  | 5    | 0.553897 | 1.152390 | 0.273148  | 0.799763  | 1.000      |
| 194  | GOBP-PROTEIN-LOCALIZATION-TO-POSTSYNAPSE          | 5    | 0.547774 | 1.150931 | 0.292719  | 0.799718  | 1.000      |
| 195  | GOBP-NEGATIVE-REGULATION-OF-LIPID-METABOLIC-PR... | 5    | 0.537670 | 1.145263 | 0.299410  | 0.812103  | 1.000      |
| 196  | GOBP-ERBB-SIGNALING-PATHWAY                       | 5    | 0.542406 | 1.143138 | 0.293853  | 0.814441  | 1.000      |
| 197  | GOBP-REGULATION-OF-PROTEIN-MODIFICATION-PROCESS   | 28   | 0.343347 | 1.141716 | 0.306683  | 0.814348  | 1.000      |
| 198  | GOBP-SENSORY-PERCEPTION                           | 9    | 0.443038 | 1.141515 | 0.295794  | 0.810846  | 1.000      |
| 199  | GOBP-REGULATION-OF-PEPTIDYL-TYROSINE-PHOSPHORY... | 9    | 0.445379 | 1.141050 | 0.329496  | 0.808162  | 1.000      |
| 200  | REACTOME-G-ALPHA-Q-SIGNALING-EVENTS               | 6    | 0.503150 | 1.140285 | 0.294479  | 0.806429  | 1.000      |
| 201  | GOBP-NEGATIVE-REGULATION-OF-PROTEOLYSIS           | 8    | 0.456454 | 1.138464 | 0.306003  | 0.807768  | 1.000      |
| 202  | GOBP-REGULATION-OF-ANATOMICAL-STRUCTURE-MORPHO... | 17   | 0.378239 | 1.136317 | 0.318822  | 0.809834  | 1.000      |
| 203  | GOBP-PROTEIN-CONTAINING-COMPLEX-SUBUNIT-ORGANI... | 15   | 0.387062 | 1.135811 | 0.307298  | 0.807366  | 1.000      |
| 204  | GOBP-NEURON-MIGRATION                             | 5    | 0.541191 | 1.135138 | 0.304878  | 0.805346  | 1.000      |
| 205  | GOBP-SENSORY-PERCEPTION-OF-PAIN                   | 5    | 0.542169 | 1.134866 | 0.320840  | 0.802285  | 1.000      |
| 206  | REACTOME-SIGNALING-BY-NTRK2-TRKB                  | 6    | 0.497214 | 1.134555 | 0.305263  | 0.799438  | 1.000      |
| 207  | GOBP-CELL-JUNCTION-ORGANIZATION                   | 19   | 0.369685 | 1.133070 | 0.310038  | 0.799933  | 1.000      |
| 208  | GOBP-REGULATION-OF-CARBOHYDRATE-METABOLIC-PROCESS | 5    | 0.532634 | 1.131260 | 0.314985  | 0.801172  | 1.000      |
| 209  | GOBP-GAMETE-GENERATION                            | 9    | 0.445295 | 1.130425 | 0.324728  | 0.799742  | 1.000      |
| 210  | GOBP-CELLULAR-RESPONSE-TO-ALCOHOL                 | 5    | 0.533158 | 1.126608 | 0.320127  | 0.806980  | 1.000      |
| 211  | GOBP-CIRCADIEN-RHYTHM                             | 13   | 0.392686 | 1.123823 | 0.323722  | 0.811168  | 1.000      |
| 212  | GOBP-REGULATION-OF-LIPASE-ACTIVITY                | 6    | 0.494158 | 1.123699 | 0.337798  | 0.807673  | 1.000      |

Continuation of Table S4

|     | NAME                                              | ID            | SIZE | ES       | NES      | NOM.p.val | FDR.q.val | FWER.p.val |
|-----|---------------------------------------------------|---------------|------|----------|----------|-----------|-----------|------------|
| 213 | GOBP-INSULIN-SECRETION                            | GO-0030073    | 7    | 0.475216 | 1.122864 | 0.301860  | 0.806225  | 1.000      |
| 214 | GOBP-REGULATION-OF-CARBOHYDRATE-BIOSYNTHETIC.P... | GO-0043255    | 5    | 0.532634 | 1.121811 | 0.326187  | 0.805766  | 1.000      |
| 215 | GOBP-PEPTIDE-HORMONE-SECRETION                    | GO-0030072    | 7    | 0.475216 | 1.121725 | 0.339595  | 0.802278  | 1.000      |
| 216 | GOBP-ENDOCYTOSIS                                  | GO-006897     | 8    | 0.456329 | 1.120751 | 0.306294  | 0.801415  | 1.000      |
| 217 | GOBP-POSITIVE-REGULATION-OF-NEURON-PROJECTION...  | GO-0010976    | 5    | 0.529076 | 1.120034 | 0.305215  | 0.799736  | 1.000      |
| 218 | GOBP-CELLULAR-RESPONSE-TO-DNA-DAMAGE-STIMULUS     | GO-0068974    | 5    | 0.529417 | 1.119047 | 0.326594  | 0.798809  | 1.000      |
| 219 | GOBP-AXON-DEVELOPMENT                             | GO-0061564    | 18   | 0.372379 | 1.118752 | 0.319948  | 0.795951  | 1.000      |
| 220 | GOBP-POSITIVE-REGULATION-OF-CELL-PROJECTION-OR... | GO-0031346    | 10   | 0.430290 | 1.118138 | 0.338356  | 0.794043  | 1.000      |
| 221 | GOBP-REGULATION-OF-PHOSPHOLIPASE-ACTIVITY         | GO-0010517    | 6    | 0.494158 | 1.115957 | 0.313869  | 0.796594  | 1.000      |
| 222 | GOBP-REGULATION-OF-FAT-CELL-DIFFERENTIATION       | GO-0045598    | 6    | 0.496602 | 1.112642 | 0.323034  | 0.802203  | 1.000      |
| 223 | REACTOME-CLASS-C-3-METABOTROPIC-GLUTAMATE-PHER... | R-RNO-420499  | 7    | 0.470785 | 1.111284 | 0.326440  | 0.802371  | 1.000      |
| 224 | GOBP-REGULATION-OF-PHOSPHORUS-METABOLIC-PROCESS   | GO-0051174    | 26   | 0.340835 | 1.111158 | 0.335793  | 0.799064  | 1.000      |
| 225 | GOBP-SEXUAL-REPRODUCTION                          | GO-0019953    | 10   | 0.421247 | 1.110413 | 0.338398  | 0.797432  | 1.000      |
| 226 | GOBP-POSITIVE-REGULATION-OF-SMALL-MOLECULE-MET... | GO-0062013    | 5    | 0.517755 | 1.105990 | 0.360414  | 0.806017  | 1.000      |
| 227 | GOBP-CARBOHYDRATE-BIOSYNTHETIC-PROCESS            | GO-0016051    | 5    | 0.532634 | 1.105992 | 0.362170  | 0.802527  | 1.000      |
| 228 | GOBP-CELLULAR-RESPONSE-TO-BIOTIC-STIMULUS         | GO-0071216    | 8    | 0.449604 | 1.103410 | 0.356421  | 0.806134  | 1.000      |
| 229 | GOBP-ACTIVATION-OF-PROTEIN-KINASE-ACTIVITY        | GO-0032147    | 10   | 0.420417 | 1.103163 | 0.363128  | 0.803325  | 1.000      |
| 230 | GOBP-POSITIVE-REGULATION-OF-ION-TRANSPORT         | GO-0043270    | 17   | 0.357175 | 1.102194 | 0.344828  | 0.802466  | 1.000      |
| 231 | GOBP-PEPTIDE-METABOLIC-PROCESS                    | GO-006518     | 11   | 0.404986 | 1.101216 | 0.333786  | 0.801723  | 1.000      |
| 232 | REACTOME-EXTRA-NUCLEAR-ESTROGEN-SIGNALING         | R-RNO-9008391 | 7    | 0.469816 | 1.099607 | 0.365639  | 0.802347  | 1.000      |
| 233 | GOBP-PEPTIDYL-AMINO-ACID-MODIFICATION             | GO-0018193    | 22   | 0.347168 | 1.098630 | 0.344516  | 0.801327  | 1.000      |
| 234 | GOBP-PEPTIDYL-SERINE-MODIFICATION                 | GO-0018209    | 12   | 0.400815 | 1.098596 | 0.354620  | 0.798044  | 1.000      |
| 235 | GOBP-REGULATION-OF-NERVOUS-SYSTEM-PROCESS         | GO-0031644    | 8    | 0.448495 | 1.092099 | 0.359124  | 0.801025  | 1.000      |
| 236 | GOBP-POSITIVE-REGULATION-OF-INTRACELLULAR-SIGN... | GO-1902533    | 14   | 0.386304 | 1.095641 | 0.367876  | 0.799246  | 1.000      |
| 237 | GOBP-CARBOXYLIC-ACID-TRANSPORT                    | GO-0046942    | 6    | 0.486287 | 1.094817 | 0.364023  | 0.798153  | 1.000      |
| 238 | GOBP-REGULATION-OF-ENDOCYTOSIS                    | GO-0030100    | 6    | 0.488403 | 1.091068 | 0.358273  | 0.804840  | 1.000      |
| 239 | GOBP-REGULATION-OF-LYMPHOCYTE-ACTIVATION          | GO-0051249    | 5    | 0.512694 | 1.090718 | 0.376662  | 0.802491  | 1.000      |
| 240 | GOBP-REGULATION-OF-CELLULAR-LOCALIZATION          | GO-0060341    | 17   | 0.360359 | 1.08984  | 0.358974  | 0.808917  | 1.000      |
| 241 | GOBP-CELLULAR-RESPONSE-TO-NITROGEN-COMPOUND       | GO-1901699    | 20   | 0.347124 | 1.085746 | 0.347066  | 0.808992  | 1.000      |
| 242 | GOBP-LIPID-EXPORT-FROM-CELL                       | GO-0140353    | 5    | 0.514408 | 1.085536 | 0.377273  | 0.806267  | 1.000      |
| 243 | GOBP-REGULATION-OF-CELL-SIZE                      | GO-0008361    | 5    | 0.507039 | 1.083736 | 0.373660  | 0.807708  | 1.000      |
| 244 | GOBP-CELLULAR-RESPONSE-TO-MOLECULE-OF-BACTERIA... | GO-0071219    | 8    | 0.449604 | 1.083038 | 0.372832  | 0.806246  | 1.000      |
| 245 | GOBP-REGULATION-OF-LIPID-METABOLIC-PROCESS        | GO-0019216    | 7    | 0.456705 | 1.082406 | 0.366197  | 0.804784  | 1.000      |
| 246 | GOBP-AMINO-ACID-TRANSPORT                         | GO-006865     | 6    | 0.486287 | 1.080411 | 0.377644  | 0.806660  | 1.000      |
| 247 | GOBP-POSITIVE-REGULATION-OF-PROTEIN-METABOLIC...  | GO-0051247    | 27   | 0.324883 | 1.080379 | 0.387057  | 0.803481  | 1.000      |
| 248 | GOBP-RESPONSE-TO-TEMPERATURE-STIMULUS             | GO-0009266    | 9    | 0.419237 | 1.078318 | 0.365922  | 0.805461  | 1.000      |
| 249 | GOBP-SENSORY-ORGAN-DEVELOPMENT                    | GO-0007423    | 8    | 0.436187 | 1.078197 | 0.387955  | 0.802538  | 1.000      |
| 250 | GOBP-ORGANIC-ANION-TRANSPORT                      | GO-0015711    | 6    | 0.436187 | 1.076716 | 0.398485  | 0.803101  | 1.000      |
| 251 | GOBP-PHOSPHATIDYLINOSITOL-3-KINASE-SIGNALING      | GO-0014065    | 7    | 0.460838 | 1.074921 | 0.385307  | 0.804358  | 1.000      |
| 252 | REACTOME-ESTROGEN-DEPENDENT-NUCLEAR-EVENTS-DOW... | R-RNO-9634638 | 5    | 0.507116 | 1.072643 | 0.391097  | 0.807100  | 1.000      |
| 253 | GOBP-NEGATIVE-REGULATION-OF-TRANSMEMBRANE-TRAN... | GO-0034763    | 6    | 0.474901 | 1.072587 | 0.381657  | 0.804087  | 1.000      |
| 254 | GOBP-ESTABLISHMENT-OF-PROTEIN-LOCALIZATION-TO...  | GO-0072594    | 5    | 0.498861 | 1.066284 | 0.372727  | 0.816997  | 1.000      |
| 255 | GOBP-REGULATION-OF-ENDOTHELIAL-CELL-MIGRATION     | GO-0010594    | 5    | 0.512557 | 1.063341 | 0.387906  | 0.821107  | 1.000      |

Continuation of Table S4

| NAME | ID                                                | SIZE | ES       | NES      | NOM.p.val | FDR.q.val | FWER.p.val |
|------|---------------------------------------------------|------|----------|----------|-----------|-----------|------------|
| 256  | GOBP-CELL-PART-MORPHOGENESIS                      | 25   | 0.319443 | 1.062620 | 0.387704  | 0.819715  | 1.000      |
| 257  | GOBP-NEGATIVE-REGULATION-OF-PHOSPHORYLATION       | 7    | 0.455951 | 1.062284 | 0.398827  | 0.817361  | 1.000      |
| 258  | GOBP-NEGATIVE-REGULATION-OF-TRANSFERASE-ACTIVITY  | 5    | 0.503944 | 1.062028 | 0.377916  | 0.814830  | 1.000      |
| 259  | GOBP-CYTOSOLIC-CALCIUM-ION-TRANSPORT              | 7    | 0.446263 | 1.061413 | 0.395620  | 0.813276  | 1.000      |
| 260  | GOBP-REGULATION-OF-PROTEIN-LOCALIZATION-TO-MEM... | 7    | 0.458088 | 1.061076 | 0.393275  | 0.810935  | 1.000      |
| 261  | GOBP-NEGATIVE-REGULATION-OF-TRANSPORT             | 13   | 0.373642 | 1.060524 | 0.405333  | 0.809225  | 1.000      |
| 262  | GOBP-PEPTIDE-SECRETION                            | 9    | 0.415105 | 1.059109 | 0.408769  | 0.809604  | 1.000      |
| 263  | GOBP-REGULATION-OF-POSTSYNAPSE-ORGANIZATION       | 6    | 0.461052 | 1.058055 | 0.381381  | 0.809335  | 1.000      |
| 264  | REACTOME-TRANSCRIPTIONAL-REGULATION-BY-MECP2      | 7    | 0.438468 | 1.057455 | 0.407895  | 0.807806  | 1.000      |
| 265  | GOBP-REGULATION-OF-HORMONE-SECRETION              | 8    | 0.423324 | 1.057053 | 0.409692  | 0.805710  | 1.000      |
| 266  | GOBP-ADENYLATE-CYCLASE-INHIBITING-G-PROTEIN.CO... | 9    | 0.413450 | 1.056288 | 0.401934  | 0.804657  | 1.000      |
| 267  | GOBP-CENTRAL-NERVOUS-SYSTEM-NEURON-DIFFERENTIA... | 5    | 0.500231 | 1.056038 | 0.416918  | 0.802214  | 1.000      |
| 268  | GOBP-NEGATIVE-REGULATION-OF-KINASE-ACTIVITY       | 5    | 0.503944 | 1.054626 | 0.423304  | 0.802997  | 1.000      |
| 269  | REACTOME-CIRCADIAN-CLOCK                          | 5    | 0.492116 | 1.052682 | 0.407353  | 0.804726  | 1.000      |
| 270  | GOBP-CELLULAR-RESPONSE-TO-HORMONE-STIMULUS        | 11   | 0.394869 | 1.052319 | 0.429155  | 0.802596  | 1.000      |
| 271  | GOBP-CELLULAR-COMPONENT-MORPHOGENESIS             | 25   | 0.319443 | 1.050897 | 0.405868  | 0.803311  | 1.000      |
| 272  | GOBP-OSTEOBLAST-DIFFERENTIATION                   | 5    | 0.507381 | 1.048911 | 0.420091  | 0.805052  | 1.000      |
| 273  | GOBP-CALCIUM-ION-TRANSPORT-INTO-CYTOSOL           | 7    | 0.446263 | 1.048042 | 0.417867  | 0.804162  | 1.000      |
| 274  | GOBP-CALCIUM-ION-TRANSMEMBRANE-TRANSPORT          | 7    | 0.446263 | 1.047815 | 0.418535  | 0.801829  | 1.000      |
| 275  | GOBP-CELL-MORPHOGENESIS                           | 25   | 0.319443 | 1.047670 | 0.404551  | 0.799320  | 1.000      |
| 276  | GOBP-GLAND-DEVELOPMENT                            | 7    | 0.439702 | 1.043832 | 0.413013  | 0.805554  | 1.000      |
| 277  | GOBP-IN-UTERO-EMBRYONIC-DEVELOPMENT               | 8    | 0.425462 | 1.043619 | 0.405564  | 0.803203  | 1.000      |
| 278  | REACTOME-BETA-CATENIN-INDEPENDENT-WNT-SIGNALING   | 5    | 0.493976 | 1.043054 | 0.432229  | 0.801683  | 1.000      |
| 279  | GOBP-REGULATION-OF-CELL-ADHESION                  | 13   | 0.367387 | 1.041175 | 0.435762  | 0.803407  | 1.000      |
| 280  | GOBP-REGULATION-OF-SYSTEM-PROCESS                 | 18   | 0.338266 | 1.039680 | 0.431790  | 0.804120  | 1.000      |
| 281  | GOBP-CELLULAR-RESPONSE-TO-LIPID                   | 15   | 0.358252 | 1.034645 | 0.415894  | 0.813123  | 1.000      |
| 282  | GOBP-REGULATION-OF-NERVOUS-SYSTEM-DEVELOPMENT     | 15   | 0.356778 | 1.032855 | 0.437018  | 0.813330  | 1.000      |
| 283  | GOBP-CIRCULATORY-SYSTEM-PROCESS                   | 5    | 0.489964 | 1.032767 | 0.426035  | 0.811723  | 1.000      |
| 284  | GOBP-REGULATION-OF-EPITHELIAL-CELL-MIGRATION      | 6    | 0.466564 | 1.032077 | 0.444444  | 0.810513  | 1.000      |
| 285  | GOBP-PROTEIN-COMPLEX-OLIGOMERIZATION              | 7    | 0.434238 | 1.029524 | 0.435345  | 0.813413  | 1.000      |
| 286  | GOBP-POSITIVE-REGULATION-OF-CELLULAR-PROTEIN.L... | 7    | 0.441007 | 1.029496 | 0.433824  | 0.810658  | 1.000      |
| 287  | GOBP-REGULATION-OF-MAP-KINASE-ACTIVITY            | 9    | 0.405286 | 1.028634 | 0.435211  | 0.809717  | 1.000      |
| 288  | GOBP-REGULATION-OF-AXONOGENESIS                   | 7    | 0.427567 | 1.025789 | 0.422414  | 0.813690  | 1.000      |
| 289  | GOBP-ORGANONITROGEN-COMPOUND-BIOSYNTHETIC-PROCESS | 13   | 0.360086 | 1.024842 | 0.438070  | 0.813031  | 1.000      |
| 290  | GOBP-NEGATIVE-REGULATION-OF-CYSTEINE-TYPE-ENDO... | 5    | 0.481255 | 1.024445 | 0.462639  | 0.811197  | 1.000      |
| 291  | GOBP-DENDRITE-MORPHOGENESIS                       | 7    | 0.403445 | 1.023566 | 0.459227  | 0.810268  | 1.000      |
| 292  | GOBP-EXOCYTOSIS                                   | 11   | 0.375334 | 1.018884 | 0.440771  | 0.818217  | 1.000      |
| 293  | GOBP-RESPONSE-TO-ALKALOID                         | 5    | 0.481383 | 1.017365 | 0.462250  | 0.818853  | 1.000      |
| 294  | GOBP-CELL-CYCLE-PROCESS                           | 11   | 0.378601 | 1.016066 | 0.443526  | 0.818965  | 1.000      |
| 295  | GOBP-LIPID-METABOLIC-PROCESS                      | 10   | 0.385587 | 1.015369 | 0.455296  | 0.817715  | 1.000      |
| 296  | GOBP-COGNITION                                    | 28   | 0.299733 | 1.011169 | 0.477189  | 0.824596  | 1.000      |
| 297  | GOBP-TUBE-DEVELOPMENT                             | 18   | 0.331817 | 1.010480 | 0.452320  | 0.823419  | 1.000      |
| 298  | GOBP-POSITIVE-REGULATION-OF-PHOSPHATIDYLINOSIT... | 5    | 0.465494 | 1.008740 | 0.460366  | 0.824522  | 1.000      |

Continuation of Table S4

| NAME | ID                                                | SIZE | ES       | NES      | NOM.p.val | FDR.q.val | FWER.p.val |
|------|---------------------------------------------------|------|----------|----------|-----------|-----------|------------|
| 299  | GOBP-POSITIVE-REGULATION_OF_CELLULAR_COMPONENT... | 9    | 0.392426 | 1.008635 | 0.447405  | 0.822000  | 1.000      |
| 300  | GOBP-REGULATION_OF_HORMONE-LEVELS                 | 12   | 0.356860 | 1.006754 | 0.459060  | 0.823659  | 1.000      |
| 301  | REACTOME-ONCOGENIC_MAPK-SIGNALING                 | 5    | 0.465580 | 1.000835 | 0.472180  | 0.834454  | 1.000      |
| 302  | GOBP-POSITIVE-REGULATION_OF_CELLULAR_COMPONENT... | 24   | 0.302713 | 1.000670 | 0.452830  | 0.832009  | 1.000      |
| 303  | GOBP-CELLULAR-AMIDE-METABOLIC-PROCESS             | 12   | 0.361094 | 0.993424 | 0.480000  | 0.845442  | 1.000      |
| 304  | GOBP-RESPONSE_TO_LIGHT-STIMULUS                   | 11   | 0.365761 | 0.990598 | 0.471523  | 0.849051  | 1.000      |
| 305  | GOBP-CENTRAL-NERVOUS-SYSTEM-DEVELOPMENT           | 27   | 0.292388 | 0.990030 | 0.492665  | 0.847575  | 1.000      |
| 306  | GOBP-REGULATION_OF_NEURONAL_SYNAPTIC_PLASTICITY   | 7    | 0.422088 | 0.988802 | 0.491379  | 0.847695  | 1.000      |
| 307  | GOBP-INTRINSIC-APOPTOTIC-SIGNALING-PATHWAY        | 5    | 0.463652 | 0.988014 | 0.508501  | 0.846763  | 1.000      |
| 308  | HALLMARK_KRAS-SIGNALING_UP                        | 6    | 0.433197 | 0.987981 | 0.487482  | 0.844079  | 1.000      |
| 309  | GOBP-POSITIVE-REGULATION_OF_DEVELOPMENTAL_PROCESS | 32   | 0.284040 | 0.986006 | 0.491985  | 0.845678  | 1.000      |
| 310  | GOBP-CALCIUM-MEDIATED-SIGNALING                   | 10   | 0.368191 | 0.982802 | 0.491429  | 0.850297  | 1.000      |
| 311  | GOBP-REGULATION_OF_CELLULAR_CATABOLIC_PROCESS     | 10   | 0.374031 | 0.982715 | 0.509040  | 0.847756  | 1.000      |
| 312  | GOBP-REGULATION_OF_PEPTIDYL-SERINE-PHOSPHORYLA... | 8    | 0.392795 | 0.979701 | 0.480226  | 0.851731  | 1.000      |
| 313  | GOBP-REGULATION_OF_CELLULAR_COMPONENT-BIOGENESIS  | 10   | 0.369402 | 0.978096 | 0.499320  | 0.852398  | 1.000      |
| 314  | GOBP-ORGAN-GROWTH                                 | 5    | 0.466755 | 0.972143 | 0.503748  | 0.862698  | 1.000      |
| 315  | GOBP-REGULATION_OF_PEPTIDE-HORMONE-SECRETION      | 6    | 0.428131 | 0.971854 | 0.521870  | 0.860666  | 1.000      |
| 316  | GOBP-NEGATIVE-REGULATION_OF_IMMUNE-SYSTEM_PROCESS | 5    | 0.458157 | 0.969304 | 0.527048  | 0.863470  | 1.000      |
| 317  | GOBP-REGULATION_OF_ORGANELLE-ORGANIZATION         | 14   | 0.335545 | 0.969083 | 0.512616  | 0.861247  | 1.000      |
| 318  | GOBP-REGULATION_OF_PEPTIDE-SECRETION              | 7    | 0.416168 | 0.967985 | 0.520567  | 0.860940  | 1.000      |
| 319  | GOBP-NEGATIVE-REGULATION_OF_ION-TRANSPORT         | 11   | 0.360122 | 0.967908 | 0.527778  | 0.858399  | 1.000      |
| 320  | GOBP-CELL-MORPHOGENESIS_INVOLVED_IN_DIFFERENTI... | 22   | 0.301922 | 0.967426 | 0.513806  | 0.856782  | 1.000      |
| 321  | GOBP-REGULATION_OF_ORGAN-GROWTH                   | 5    | 0.466755 | 0.967171 | 0.530211  | 0.854660  | 1.000      |
| 322  | GOBP-POSITIVE-REGULATION_OF_PEPTIDYL-SERINE_PH... | 8    | 0.392795 | 0.966916 | 0.527536  | 0.852618  | 1.000      |
| 323  | GOBP-POSITIVE-REGULATION_OF_DNA-BINDING-TRANSC... | 10   | 0.373826 | 0.963466 | 0.526316  | 0.857296  | 1.000      |
| 324  | GOBP-REGULATION_OF_EXTRINSIC-APOPTOTIC-SIGNALI... | 6    | 0.419498 | 0.960981 | 0.507225  | 0.859924  | 1.000      |
| 325  | GOBP-POSITIVE-REGULATION_OF_LOCOMOTION            | 11   | 0.364375 | 0.960239 | 0.519890  | 0.858813  | 1.000      |
| 326  | GOBP-ESTABLISHMENT_OF_PROTEIN-LOCALIZATION        | 17   | 0.320294 | 0.958866 | 0.507833  | 0.859066  | 1.000      |
| 327  | GOBP-LONG-TERM-MEMORY                             | 6    | 0.431231 | 0.957409 | 0.507983  | 0.859564  | 1.000      |
| 328  | GOBP-REGULATION_OF_MUSCLE-ADAPTATION              | 5    | 0.441541 | 0.956200 | 0.529687  | 0.859448  | 1.000      |
| 329  | GOBP-REGULATION_OF_ANION-TRANSPORT                | 20   | 0.307874 | 0.955094 | 0.539702  | 0.859214  | 1.000      |
| 330  | GOBP-CELLULAR_COMPONENT-MAINTENANCE               | 5    | 0.451391 | 0.954875 | 0.547945  | 0.856979  | 1.000      |
| 331  | GOBP-CELL-MORPHOGENESIS_INVOLVED_IN_NEURON_DIF... | 22   | 0.301922 | 0.954275 | 0.522556  | 0.855636  | 1.000      |
| 332  | GOBP-NEGATIVE-REGULATION_OF_PROTEIN-MODIFICATI... | 10   | 0.359998 | 0.950730 | 0.530497  | 0.860453  | 1.000      |
| 333  | GOBP-ORGANOPHOSPHATE-METABOLIC-PROCESS            | 8    | 0.381223 | 0.949478 | 0.544286  | 0.860540  | 1.000      |
| 334  | GOBP-CELLULAR-LIPID-METABOLIC-PROCESS             | 7    | 0.401564 | 0.948976 | 0.545052  | 0.859116  | 1.000      |
| 335  | GOBP-POSITIVE-REGULATION_OF_DEVELOPMENTAL-GROWTH  | 8    | 0.384694 | 0.946960 | 0.545953  | 0.860649  | 1.000      |
| 336  | GOBP-REGULATION_OF_MITOTIC-CELL-CYCLE             | 5    | 0.448373 | 0.946857 | 0.543511  | 0.858305  | 1.000      |
| 337  | GOBP-MEMORY                                       | 13   | 0.334937 | 0.946478 | 0.537415  | 0.856616  | 1.000      |
| 338  | GOBP-POSITIVE-REGULATION_OF_GROWTH                | 9    | 0.374630 | 0.941952 | 0.559829  | 0.863466  | 1.000      |
| 339  | GOBP-DEPHOSPHORYLATION                            | 7    | 0.400243 | 0.940883 | 0.561848  | 0.863105  | 1.000      |
| 340  | GOBP-POSITIVE-REGULATION_OF_MOLECULAR-FUNCTION    | 37   | 0.273754 | 0.940527 | 0.530374  | 0.861387  | 1.000      |
| 341  | GOBP-PROTEIN-DEPHOSPHORYLATION                    | 7    | 0.400243 | 0.940294 | 0.542222  | 0.859383  | 1.000      |



Continuation of Table S4

| NAME | ID                                                | SIZE | ES       | NES      | NOM.p.val | FDR.q.val | FWER.p.val |
|------|---------------------------------------------------|------|----------|----------|-----------|-----------|------------|
| 342  | GOBP-REGULATION-OF-PROTEIN-SERINE-THREONINE-KI... | 12   | 0.335194 | 0.939431 | 0.549795  | 0.858598  | 1.000      |
| 343  | GOBP-EXCITATORY-CHEMICAL-SYNAPTIC-TRANSMISSION    | 5    | 0.445783 | 0.939274 | 0.547904  | 0.856424  | 1.000      |
| 344  | GOBP-REGULATION-OF-LIPID-BIOSYNTHETIC-PROCESS     | 6    | 0.410809 | 0.938819 | 0.540179  | 0.854936  | 1.000      |
| 345  | GOBP-RESPONSE-TO-ETHANOL                          | 5    | 0.445783 | 0.936446 | 0.54217   | 0.857401  | 1.000      |
| 346  | GOBP-REGULATION-OF-PHOSPHATIDYLINOSITOL-3-KINA... | 6    | 0.411724 | 0.935935 | 0.562874  | 0.855933  | 1.000      |
| 347  | GOBP-LIPID-BIOSYNTHETIC-PROCESS                   | 6    | 0.416809 | 0.932088 | 0.573082  | 0.861176  | 1.000      |
| 348  | GOBP-POSITIVE-REGULATION-OF-SECRETION             | 6    | 0.421156 | 0.931636 | 0.574156  | 0.859581  | 1.000      |
| 349  | GOBP-MUSCLE-ADAPTATION                            | 5    | 0.441541 | 0.930644 | 0.567407  | 0.859074  | 1.000      |
| 350  | GOBP-RHYTHMIC-PROCESS                             | 15   | 0.314720 | 0.926783 | 0.565274  | 0.864203  | 1.000      |
| 351  | GOBP-CELL-MIGRATION                               | 22   | 0.289693 | 0.920951 | 0.591811  | 0.873314  | 1.000      |
| 352  | GOBP-NUCLEAR-TRANSPORT                            | 5    | 0.430060 | 0.919275 | 0.581602  | 0.874196  | 1.000      |
| 353  | GOBP-BLOOD-VESSEL-MORPHOGENESIS                   | 14   | 0.322944 | 0.917078 | 0.593540  | 0.876011  | 1.000      |
| 354  | GOBP-MULTICELLULAR-ORGANISM-REPRODUCTION          | 12   | 0.332259 | 0.915927 | 0.592748  | 0.875862  | 1.000      |
| 355  | GOBP-NEGATIVE-REGULATION-OF-CATABOLIC-PROCESS     | 8    | 0.374748 | 0.914927 | 0.581259  | 0.875263  | 1.000      |
| 356  | GOBP-PROTEIN-TETRAMERIZATION                      | 5    | 0.429397 | 0.913940 | 0.579186  | 0.874627  | 1.000      |
| 357  | GOBP-HEAD-DEVELOPMENT                             | 23   | 0.282286 | 0.911885 | 0.592040  | 0.876371  | 1.000      |
| 358  | GOBP-ACTIVATION-OF-MAPK-ACTIVITY                  | 6    | 0.405143 | 0.910298 | 0.600587  | 0.877049  | 1.000      |
| 359  | GOBP-POSITIVE-REGULATION-OF-MAP-KINASE-ACTIVITY   | 6    | 0.405143 | 0.908853 | 0.600592  | 0.877434  | 1.000      |
| 360  | GOBP-CARBOHYDRATE-HOMEOSTASIS                     | 7    | 0.382980 | 0.907313 | 0.610542  | 0.878056  | 1.000      |
| 361  | GOBP-MITOTIC-CELL-CYCLE                           | 10   | 0.337309 | 0.905979 | 0.590723  | 0.878189  | 1.000      |
| 362  | GOBP-REGULATION-OF-DEVELOPMENTAL-GROWTH           | 9    | 0.357592 | 0.905179 | 0.596467  | 0.877258  | 1.000      |
| 363  | GOBP-INOSITOL-LIPID-MEDIATED-SIGNALING            | 8    | 0.362307 | 0.898399 | 0.626100  | 0.887651  | 1.000      |
| 364  | GOBP-REGULATION-OF-BODY-FLUID-LEVELS              | 11   | 0.339152 | 0.898375 | 0.604054  | 0.885267  | 1.000      |
| 365  | GOBP-CIRCULATORY-SYSTEM-DEVELOPMENT               | 21   | 0.281467 | 0.897876 | 0.628535  | 0.883741  | 1.000      |
| 366  | GOBP-REGULATION-OF-RESPONSE-TO-EXTERNAL-STIMULUS  | 15   | 0.314523 | 0.893867 | 0.601333  | 0.888847  | 1.000      |
| 367  | GOBP-POSITIVE-REGULATION-OF-LEUKOCYTE-CELL-CEL... | 5    | 0.413723 | 0.891376 | 0.619120  | 0.891125  | 1.000      |
| 368  | GOBP-ANIMAL-ORGAN-MORPHOGENESIS                   | 12   | 0.313849 | 0.889333 | 0.601361  | 0.892675  | 1.000      |
| 369  | GOBP-CARBOHYDRATE-DERIVATIVE-METABOLIC-PROCESS    | 8    | 0.352983 | 0.888846 | 0.598601  | 0.891260  | 1.000      |
| 370  | GOBP-RESPONSE-TO-ACID-CHEMICAL                    | 6    | 0.392319 | 0.887978 | 0.620690  | 0.890401  | 1.000      |
| 371  | GOBP-NEGATIVE-REGULATION-OF-PHOSPHORUS-METABOL... | 9    | 0.344996 | 0.887420 | 0.622563  | 0.889000  | 1.000      |
| 372  | GOBP-NEGATIVE-REGULATION-OF-CATALYTIC-ACTIVITY    | 17   | 0.297861 | 0.887089 | 0.633075  | 0.887234  | 1.000      |
| 373  | GOBP-POSITIVE-REGULATION-OF-EPITHELIAL-CELL-PR... | 7    | 0.374510 | 0.886607 | 0.608392  | 0.885829  | 1.000      |
| 374  | GOBP-NEGATIVE-REGULATION-OF-PEPTIDASE-ACTIVITY    | 6    | 0.388424 | 0.884397 | 0.635240  | 0.887510  | 1.000      |
| 375  | GOBP-ADENYLATE-CYCLASE-INHIBITING-G-PROTEIN-CO... | 5    | 0.421687 | 0.883349 | 0.634146  | 0.887167  | 1.000      |
| 376  | GOBP-LEUKOCYTE-CELL-ADHESION                      | 6    | 0.391994 | 0.882676 | 0.626667  | 0.885989  | 1.000      |
| 377  | GOBP-POSITIVE-REGULATION-OF-CELL-CELL-ADHESION    | 5    | 0.413723 | 0.881171 | 0.640553  | 0.886386  | 1.000      |
| 378  | GOBP-TUBE-MORPHOGENESIS                           | 15   | 0.307985 | 0.880239 | 0.633638  | 0.885622  | 1.000      |
| 379  | GOBP-REGULATION-OF-TRANSMEMBRANE-TRANSPORT        | 23   | 0.27304  | 0.879034 | 0.648855  | 0.885538  | 1.000      |
| 380  | GOBP-EMBRYONIC-MORPHOGENESIS                      | 6    | 0.390355 | 0.875912 | 0.631741  | 0.883418  | 1.000      |
| 381  | GOBP-POSITIVE-REGULATION-OF-CELL-GROWTH           | 6    | 0.392173 | 0.875654 | 0.649331  | 0.881682  | 1.000      |
| 382  | GOBP-LEARNING                                     | 13   | 0.307485 | 0.875688 | 0.629679  | 0.884556  | 1.000      |
| 383  | GOBP-NEGATIVE-REGULATION-OF-CELL-DEATH            | 22   | 0.276307 | 0.873640 | 0.655779  | 0.886143  | 1.000      |
| 384  | GOBP-GLUCOSE-METABOLIC-PROCESS                    | 6    | 0.384855 | 0.871868 | 0.637462  | 0.886835  | 1.000      |

Continuation of Table S4

| NAME | ID                                                | SIZE | ES       | NES      | NOM.p.val | FDR.q.val | FWER.p.val |
|------|---------------------------------------------------|------|----------|----------|-----------|-----------|------------|
| 385  | GOBP-DEVELOPMENTAL-GROWTH                         | 10   | 0.332129 | 0.871127 | 0.630986  | 0.885912  | 1.000      |
| 386  | GOBP-REGULATION-OF-PROTEIN-CATABOLIC-PROCESS      | 7    | 0.365255 | 0.869269 | 0.637725  | 0.887061  | 1.000      |
| 387  | GOBP-REGULATION-OF-VASCULATURE-DEVELOPMENT        | 5    | 0.413688 | 0.867758 | 0.654743  | 0.887240  | 1.000      |
| 388  | GOBP-MONOSACCHARIDE-METABOLIC-PROCESS             | 6    | 0.384855 | 0.867737 | 0.631954  | 0.884991  | 1.000      |
| 389  | GOBP-NEURON-DEATH                                 | 18   | 0.285434 | 0.866991 | 0.625160  | 0.883950  | 1.000      |
| 390  | GOBP-AGING                                        | 13   | 0.307029 | 0.866010 | 0.630102  | 0.883489  | 1.000      |
| 391  | GOBP-REGULATION-OF-SMALL-MOLECULE-METABOLIC-PR... | 9    | 0.334503 | 0.862417 | 0.653740  | 0.887549  | 1.000      |
| 392  | GOBP-NERVE-DEVELOPMENT                            | 9    | 0.336150 | 0.861798 | 0.652531  | 0.886371  | 1.000      |
| 393  | GOBP-POSITIVE-REGULATION-OF-ENDOTHELIAL-CELL-P... | 6    | 0.379955 | 0.858675 | 0.655488  | 0.889613  | 1.000      |
| 394  | GOBP-AMEBOIDAL-TYPE-CELL-MIGRATION                | 11   | 0.317684 | 0.856580 | 0.651260  | 0.890976  | 1.000      |
| 395  | GOBP-PROTEIN-LOCALIZATION-TO-ORGANELLE            | 8    | 0.343437 | 0.855922 | 0.643478  | 0.889816  | 1.000      |
| 396  | GOBP-SMALL-MOLECULE-METABOLIC-PROCESS             | 16   | 0.287356 | 0.855607 | 0.660053  | 0.888114  | 1.000      |
| 397  | GOBP-NEGATIVE-REGULATION-OF-ANION-TRANSPORT       | 8    | 0.352655 | 0.855252 | 0.656077  | 0.886546  | 1.000      |
| 398  | GOBP-NEGATIVE-REGULATION-OF-PROTEIN-METABOLIC-... | 20   | 0.271517 | 0.854286 | 0.657071  | 0.885896  | 1.000      |
| 399  | GOBP-REGULATION-OF-PROTEIN-LOCALIZATION           | 18   | 0.282815 | 0.853575 | 0.665786  | 0.884927  | 1.000      |
| 400  | GOBP-DEFENSE-RESPONSE                             | 19   | 0.278056 | 0.850251 | 0.638821  | 0.888458  | 1.000      |
| 401  | GOBP-PHAGOCYTOSIS                                 | 5    | 0.396903 | 0.848987 | 0.666165  | 0.888355  | 1.000      |
| 402  | GOBP-REGULATION-OF-PEPTIDE-TRANSPORT              | 10   | 0.323636 | 0.842469 | 0.679894  | 0.896812  | 1.000      |
| 403  | GOBP-PATTERN-SPECIFICATION-PROCESS                | 6    | 0.373778 | 0.842069 | 0.670695  | 0.895243  | 1.000      |
| 404  | GOBP-CELLULAR-MACROMOLECULE-LOCALIZATION          | 20   | 0.267745 | 0.838759 | 0.678161  | 0.898730  | 1.000      |
| 405  | REACTOME-MAPK-FAMILY-SIGNALING-CASCADES           | 12   | 0.302557 | 0.835967 | 0.674581  | 0.901451  | 1.000      |
| 406  | GOBP-SPROUTING-ANGIOGENESIS                       | 5    | 0.388130 | 0.835963 | 0.697819  | 0.899238  | 1.000      |
| 407  | GOBP-REGULATION-OF-LIPID-LOCALIZATION             | 5    | 0.392034 | 0.834309 | 0.712166  | 0.899959  | 1.000      |
| 408  | GOBP-REGULATION-OF-CATABOLIC-PROCESS              | 13   | 0.295239 | 0.832904 | 0.684070  | 0.900172  | 1.000      |
| 409  | GOBP-REPRODUCTIVE-SYSTEM-DEVELOPMENT              | 6    | 0.368967 | 0.832896 | 0.686544  | 0.897986  | 1.000      |
| 410  | GOBP-STRIATED-MUSCLE-CELL-DIFFERENTIATION         | 9    | 0.331742 | 0.832790 | 0.680764  | 0.895986  | 1.000      |
| 411  | GOBP-REGIONALIZATION                              | 6    | 0.373778 | 0.831932 | 0.700880  | 0.895105  | 1.000      |
| 412  | GOBP-REGULATION-OF-TRANSPORTER-ACTIVITY           | 17   | 0.275722 | 0.827846 | 0.684211  | 0.899625  | 1.000      |
| 413  | GOBP-RESPONSE-TO-ABIOTIC-STIMULUS                 | 27   | 0.247811 | 0.826005 | 0.706897  | 0.900459  | 1.000      |
| 414  | GOBP-RESPONSE-TO-KETONE                           | 7    | 0.345982 | 0.824696 | 0.694524  | 0.900459  | 1.000      |
| 415  | GOBP-REGULATION-OF-CELLULAR-PROTEIN-LOCALIZATION  | 12   | 0.292699 | 0.823316 | 0.682243  | 0.900554  | 1.000      |
| 416  | GOBP-APOPTOTIC-MITOCHONDRIAL-CHANGES              | 6    | 0.363557 | 0.822225 | 0.695965  | 0.900244  | 1.000      |
| 417  | GOBP-RESPONSE-TO-MOLECULE-OF-BACTERIAL-ORIGIN     | 13   | 0.287963 | 0.821991 | 0.693243  | 0.898432  | 1.000      |
| 418  | GOBP-NEGATIVE-REGULATION-OF-SYNAPTIC-TRANSMISSION | 6    | 0.359240 | 0.821898 | 0.699708  | 0.896429  | 1.000      |
| 419  | GOBP-RESPONSE-TO-BACTERIUM                        | 13   | 0.287963 | 0.819541 | 0.703655  | 0.898225  | 1.000      |
| 420  | GOBP-REGULATION-OF-PROTEIN-LOCALIZATION-TO-CEL... | 6    | 0.363287 | 0.817400 | 0.708093  | 0.899403  | 1.000      |
| 421  | GOBP-RESPONSE-TO-PEPTIDE                          | 18   | 0.266981 | 0.812472 | 0.695652  | 0.905108  | 1.000      |
| 422  | GOBP-NEUROTROPHIN-TRK-RECEPTOR-SIGNALING-PATHWAY  | 6    | 0.353369 | 0.811177 | 0.713650  | 0.905158  | 1.000      |
| 423  | REACTOME-NEUROUS-SYSTEM-DEVELOPMENT               | 14   | 0.281196 | 0.808416 | 0.725389  | 0.907377  | 1.000      |
| 424  | GOBP-TRANSMEMBRANE-RECEPTOR-PROTEIN-TYROSINE-K... | 19   | 0.258632 | 0.805103 | 0.719059  | 0.910339  | 1.000      |
| 425  | GOBP-REGULATION-OF-PROTEOLYSIS                    | 12   | 0.289615 | 0.802187 | 0.717984  | 0.912543  | 1.000      |
| 426  | GOBP-CELLULAR-RESPONSE-TO-ABIOTIC-STIMULUS        | 7    | 0.342142 | 0.796397 | 0.736070  | 0.919340  | 1.000      |
| 427  | GOBP-CELL-CELL-ADHESION                           | 14   | 0.275429 | 0.796215 | 0.735294  | 0.917527  | 1.000      |

Continuation of Table S4

| NAME | ID                                                | SIZE | ES       | NES      | NOM.p.val | FDR.q.val | FWER.p.val |
|------|---------------------------------------------------|------|----------|----------|-----------|-----------|------------|
| 428  | GOBP-NEGATIVE-REGULATION-OF-INTRACELLULAR-SIGN... | 7    | 0.330248 | 0.796038 | 0.723781  | 0.915656  | 1.000      |
| 429  | GOBP-NEUTROPHIL-SIGNALING-PATHWAY                 | 6    | 0.353369 | 0.795836 | 0.728083  | 0.913853  | 1.000      |
| 430  | GOBP-LOCOMOTION                                   | 31   | 0.228546 | 0.794926 | 0.710145  | 0.913170  | 1.000      |
| 431  | GOBP-NEURON-APOPTOTIC-PROCESS                     | 12   | 0.291318 | 0.793906 | 0.749662  | 0.912670  | 1.000      |
| 432  | GOBP-MATERNAL-PROCESS-INVOLVED-IN-FEMALE-PREGN... | 5    | 0.383593 | 0.793102 | 0.759690  | 0.911813  | 1.000      |
| 433  | GOBP-LONG-TERM-SYNAPTIC-DEPRESSION                | 5    | 0.374218 | 0.792976 | 0.733537  | 0.909886  | 1.000      |
| 434  | GOBP-ENDOTHELIAL-CELL-PROLIFERATION               | 8    | 0.319925 | 0.792224 | 0.733711  | 0.908772  | 1.000      |
| 435  | GOBP-VASCULATURE-DEVELOPMENT                      | 17   | 0.263332 | 0.792031 | 0.766927  | 0.906950  | 1.000      |
| 436  | GOBP-RESPONSE-TO-NICOTINE                         | 7    | 0.334449 | 0.790981 | 0.739568  | 0.906530  | 1.000      |
| 437  | GOBP-NEGATIVE-REGULATION-OF-LOCOMOTION            | 5    | 0.366410 | 0.789256 | 0.737313  | 0.907033  | 1.000      |
| 438  | REACTOME-MEMBRANE-TRAFFICKING                     | 5    | 0.369231 | 0.789223 | 0.749254  | 0.905025  | 1.000      |
| 439  | REACTOME-CYTOKINE-SIGNALING-IN-IMMUNE-SYSTEM      | 21   | 0.249841 | 0.788484 | 0.736709  | 0.903947  | 1.000      |
| 440  | GOBP-RESPONSE-TOLLIPID                            | 19   | 0.254464 | 0.787381 | 0.754057  | 0.903593  | 1.000      |
| 441  | GOBP-FAT-CELL-DIFFERENTIATION                     | 9    | 0.305997 | 0.787179 | 0.745739  | 0.901899  | 1.000      |
| 442  | GOBP-RESPONSE-TO-UV                               | 5    | 0.377657 | 0.786718 | 0.762346  | 0.900570  | 1.000      |
| 443  | GOBP-PROTEIN-CATABOLIC-PROCESS                    | 8    | 0.317545 | 0.786464 | 0.743920  | 0.898962  | 1.000      |
| 444  | GOBP-CELLULAR-RESPONSE-TO-EXTERNAL-STIMULUS       | 10   | 0.298457 | 0.780584 | 0.762689  | 0.905507  | 1.000      |
| 445  | GOBP-MULTIORGANISM-PROCESS                        | 16   | 0.264181 | 0.779939 | 0.748988  | 0.904444  | 1.000      |
| 446  | REACTOME-VESICLE-MEDIATED-TRANSPORT               | 5    | 0.369231 | 0.774592 | 0.806748  | 0.910367  | 1.000      |
| 447  | GOBP-NEGATIVE-REGULATION-OF-APOPTOTIC-SIGNALIN... | 7    | 0.327114 | 0.773537 | 0.752608  | 0.909837  | 1.000      |
| 448  | GOBP-ERK1-AND-ERK2-CASCADE                        | 5    | 0.353170 | 0.763179 | 0.777778  | 0.922311  | 1.000      |
| 449  | GOBP-MITOCHONDRION-ORGANIZATION                   | 7    | 0.321620 | 0.761394 | 0.763348  | 0.922786  | 1.000      |
| 450  | GOBP-MONOAMINE-TRANSPORT                          | 5    | 0.354985 | 0.758311 | 0.808670  | 0.925015  | 1.000      |
| 451  | GOBP-NUCLEOBASE-CONTAINING-SMALL-MOLECULE-META... | 7    | 0.316438 | 0.751403 | 0.763554  | 0.932782  | 1.000      |
| 452  | GOBP-CARBOHYDRATE-METABOLIC-PROCESS               | 9    | 0.295179 | 0.750659 | 0.797737  | 0.931750  | 1.000      |
| 453  | GOBP-POSITIVE-REGULATION-OF-CELL-ADHESION         | 7    | 0.317306 | 0.747919 | 0.787143  | 0.933534  | 1.000      |
| 454  | GOBP-RESPONSE-TO-PEPTIDE-HORMONE                  | 13   | 0.265210 | 0.745956 | 0.824866  | 0.934144  | 1.000      |
| 455  | GOBP-NEGATIVE-REGULATION-OF-GENE-EXPRESSION       | 11   | 0.280512 | 0.745796 | 0.786217  | 0.932307  | 1.000      |
| 456  | GOBP-ORGANONITROGEN-COMPOUND-CATABOLIC-PROCESS    | 10   | 0.280737 | 0.743383 | 0.776999  | 0.933534  | 1.000      |
| 457  | GOBP-POSITIVE-REGULATION-OF-GENE-EXPRESSION       | 16   | 0.248324 | 0.743059 | 0.800000  | 0.931896  | 1.000      |
| 458  | GOBP-RESPONSE-TO-ALCOHOL                          | 11   | 0.271673 | 0.741108 | 0.806849  | 0.932421  | 1.000      |
| 459  | GOBP-REGULATION-OF-CELLULAR-COMPONENT-MOVEMENT    | 15   | 0.254244 | 0.740381 | 0.785252  | 0.931366  | 1.000      |
| 460  | GOBP-PROTEIN-LOCALIZATION-TO-CELL-JUNCTION        | 6    | 0.330314 | 0.738210 | 0.815267  | 0.932156  | 1.000      |
| 461  | GOBP-MUSCLE-CELL-DIFFERENTIATION                  | 10   | 0.278407 | 0.737884 | 0.792208  | 0.930573  | 1.000      |
| 462  | GOBP-NEGATIVE-REGULATION-OF-SIGNALING             | 21   | 0.235383 | 0.734187 | 0.814910  | 0.933425  | 1.000      |
| 463  | GOBP-REPRODUCTION                                 | 18   | 0.238262 | 0.732177 | 0.817594  | 0.934133  | 1.000      |
| 464  | GOBP-REGULATION-OF-DNA-BINDING-TRANSCRIPTION.F... | 16   | 0.244460 | 0.730460 | 0.814474  | 0.934281  | 1.000      |
| 465  | GOBP-MACROMOLECULE-CATABOLIC-PROCESS              | 11   | 0.265997 | 0.728587 | 0.819293  | 0.934585  | 1.000      |
| 466  | GOBP-EPITHELIAL-CELL-PROLIFERATION                | 12   | 0.262624 | 0.720056 | 0.804289  | 0.943584  | 1.000      |
| 467  | GOBP-MUSCLE-SYSTEM-PROCESS                        | 9    | 0.283464 | 0.719148 | 0.814111  | 0.942765  | 1.000      |
| 468  | GOBP-ENDOTHELIAL-CELL-MIGRATION                   | 8    | 0.283447 | 0.715921 | 0.812921  | 0.944675  | 1.000      |
| 469  | GOBP-IMPORT-INTO-CELL                             | 6    | 0.315328 | 0.713980 | 0.832836  | 0.945155  | 1.000      |
| 470  | GOBP-REGULATION-OF-GROWTH                         | 13   | 0.250023 | 0.713096 | 0.819135  | 0.944339  | 1.000      |

Continuation of Table S4

| NAME                                                  | ID         | SIZE | ES       | NES      | NOM.p.val | FDR.q.val | FWER.p.val |
|-------------------------------------------------------|------------|------|----------|----------|-----------|-----------|------------|
| 471 GOBP-REGULATION-OF-CYSTEINE-TYPE-ENDOPEPTIDASE... | GO:2000116 | 9    | 0.274191 | 0.711609 | 0.807580  | 0.944224  | 1.000      |
| 472 GOBP-ORGANIC-ACID-METABOLIC-PROCESS               | GO:0006082 | 7    | 0.300400 | 0.711585 | 0.842466  | 0.942252  | 1.000      |
| 473 GOBP-REGULATION-OF-OSTEOCLAST-DIFFERENTIATION     | GO:0045670 | 5    | 0.329609 | 0.710791 | 0.858859  | 0.941170  | 1.000      |
| 474 GOBP-POSITIVE-REGULATION-OF-PROTEOLYSIS           | GO:0045862 | 8    | 0.287312 | 0.704387 | 0.835443  | 0.947084  | 1.000      |
| 475 GOBP-INNATE-IMMUNE-RESPONSE                       | GO:0045087 | 7    | 0.292838 | 0.703039 | 0.831625  | 0.946687  | 1.000      |
| 476 GOBP-CELL-JUNCTION-ASSEMBLY                       | GO:0034329 | 8    | 0.285659 | 0.701408 | 0.839650  | 0.946582  | 1.000      |
| 477 GOBP-EMBRYONIC-ORGAN-DEVELOPMENT                  | GO:0048568 | 7    | 0.303164 | 0.701267 | 0.832593  | 0.944769  | 1.000      |
| 478 GOBP-NEGATIVE-REGULATION-OF-CELL-PROJECTION-OR... | GO:0031345 | 5    | 0.332383 | 0.701176 | 0.835616  | 0.942910  | 1.000      |
| 479 GOBP-CELLULAR-RESPONSE-TO-OXYGEN-CONTAINING.CO... | GO:1901701 | 29   | 0.210703 | 0.700410 | 0.853629  | 0.941793  | 1.000      |
| 480 GOBP-GROWTH                                       | GO:0040007 | 14   | 0.242780 | 0.697460 | 0.833333  | 0.943233  | 1.000      |
| 481 GOBP-BLOOD-VESSEL-ENDOTHELIAL-CELL-MIGRATION      | GO:0043534 | 8    | 0.283447 | 0.696388 | 0.854930  | 0.942522  | 1.000      |
| 482 GOBP-MONOCARBOXYLIC-ACID-METABOLIC-PROCESS        | GO:0032787 | 6    | 0.311794 | 0.695576 | 0.860058  | 0.941508  | 1.000      |
| 483 GOBP-TAXIS                                        | GO:0042330 | 14   | 0.241473 | 0.691020 | 0.853977  | 0.944647  | 1.000      |
| 484 GOBP-REGULATION-OF-PROTEIN-STABILITY              | GO:0031647 | 5    | 0.329342 | 0.690058 | 0.874807  | 0.943817  | 1.000      |
| 485 GOBP-CELLULAR-RESPONSE-TO-INORGANIC-SUBSTANCE     | GO:0071241 | 11   | 0.257611 | 0.689685 | 0.863319  | 0.942304  | 1.000      |
| 486 GOBP-RESPONSE-TO-TUMOR-NECROSIS-FACTOR            | GO:0034612 | 7    | 0.289646 | 0.688587 | 0.865278  | 0.941703  | 1.000      |
| 487 GOBP-REGULATION-OF-CELL-ACTIVATION                | GO:0050865 | 8    | 0.284631 | 0.686618 | 0.849928  | 0.941917  | 1.000      |
| 488 GOBP-RESPONSE-TO-BIOTIC-STIMULUS                  | GO:0009607 | 17   | 0.226659 | 0.686172 | 0.864474  | 0.940428  | 1.000      |
| 489 GOBP-CELL-CELL-SIGNALING-BY-WNT                   | GO:0198738 | 7    | 0.292317 | 0.684920 | 0.856515  | 0.939891  | 1.000      |
| 490 GOBP-POSITIVE-REGULATION-OF-RESPONSE-TO-EXTERN... | GO:0032103 | 9    | 0.273118 | 0.683220 | 0.858543  | 0.939803  | 1.000      |
| 491 GOBP-BIOLOGICAL-ADHESION                          | GO:0022610 | 19   | 0.219498 | 0.681910 | 0.863520  | 0.939247  | 1.000      |
| 492 GOBP-PURINE-CONTAINING-COMPOUND-METABOLIC-PROCESS | GO:0072521 | 6    | 0.308673 | 0.680787 | 0.884181  | 0.938582  | 1.000      |
| 493 GOBP-NEURON-PROJECTION-GUIDANCE                   | GO:0097485 | 9    | 0.273168 | 0.678164 | 0.860955  | 0.939404  | 1.000      |
| 494 GOBP-REGULATION-OF-CYTOSKELETON-ORGANIZATION      | GO:0051493 | 5    | 0.318758 | 0.676363 | 0.883614  | 0.939333  | 1.000      |
| 495 GOBP-TISSUE-MIGRATION                             | GO:0090130 | 9    | 0.268503 | 0.672779 | 0.871191  | 0.941138  | 1.000      |
| 496 GOBP-INFLAMMATORY-RESPONSE                        | GO:0006954 | 12   | 0.239345 | 0.666354 | 0.864792  | 0.945876  | 1.000      |
| 497 GOBP-POSITIVE-REGULATION-OF-ANION-TRANSPORT       | GO:1903793 | 9    | 0.254085 | 0.656929 | 0.892458  | 0.953309  | 1.000      |
| 498 GOBP-NEUROINFLAMMATORY-RESPONSE                   | GO:0150076 | 5    | 0.310007 | 0.654343 | 0.917169  | 0.953902  | 1.000      |
| 499 GOBP-CELL-GROWTH                                  | GO:0016049 | 10   | 0.247424 | 0.654113 | 0.883657  | 0.952206  | 1.000      |
| 500 GOBP-ORGANIC-HYDROXY-COMPOUND-METABOLIC-PROCESS   | GO:1901615 | 8    | 0.262385 | 0.641436 | 0.903819  | 0.961834  | 1.000      |
| 501 GOBP-RESPONSE-TO-METAL-ION                        | GO:0010038 | 15   | 0.219218 | 0.640004 | 0.921260  | 0.961229  | 1.000      |
| 502 GOBP-REGULATION-OF-PEPTIDASE-ACTIVITY             | GO:0052547 | 10   | 0.240018 | 0.629484 | 0.899729  | 0.968847  | 1.000      |
| 503 GOBP-NEGATIVE-REGULATION-OF-HYDROLASE-ACTIVITY    | GO:0051346 | 11   | 0.230874 | 0.626295 | 0.910714  | 0.969618  | 1.000      |
| 504 GOBP-NEGATIVE-REGULATION-OF-CELL-DEVELOPMENT      | GO:0010721 | 6    | 0.277700 | 0.625701 | 0.917526  | 0.968202  | 1.000      |
| 505 GOBP-DEVELOPMENTAL-PROCESS-INVOLVED-IN-REPRODU... | GO:0003006 | 11   | 0.229732 | 0.625439 | 0.907104  | 0.966469  | 1.000      |
| 506 GOBP-AMYLOID-PRECURSOR-PROTEIN-METABOLIC-PROCESS  | GO:0042982 | 5    | 0.289564 | 0.619642 | 0.938897  | 0.969280  | 1.000      |
| 507 GOBP-NEGATIVE-REGULATION-OF-NERVOUS-SYSTEM.DEV... | GO:0051961 | 5    | 0.289622 | 0.617231 | 0.922256  | 0.969320  | 1.000      |
| 508 GOBP-CARDIAC-MUSCLE-TISSUE-DEVELOPMENT            | GO:0048738 | 6    | 0.272845 | 0.611507 | 0.919075  | 0.971732  | 1.000      |
| 509 GOBP-ASSOCIATIVE-LEARNING                         | GO:0008306 | 7    | 0.262356 | 0.608788 | 0.926362  | 0.971866  | 1.000      |
| 510 GOBP-MULTICELLULAR-ORGANISM-PROCESS               | GO:0044706 | 8    | 0.246643 | 0.607370 | 0.929972  | 0.970993  | 1.000      |
| 511 GOBP-AMYLOID-PRECURSOR-PROTEIN-CATABOLIC-PROCESS  | GO:0042987 | 5    | 0.289564 | 0.605670 | 0.937134  | 0.970265  | 1.000      |
| 512 GOBP-HEART-DEVELOPMENT                            | GO:0007507 | 6    | 0.272845 | 0.604764 | 0.935578  | 0.969093  | 1.000      |
| 513 GOBP-RESPONSE-TO-INORGANIC-SUBSTANCE              | GO:0010035 | 19   | 0.195394 | 0.604657 | 0.935849  | 0.967278  | 1.000      |

Continuation of Table S4

| NAME | ID                                                | SIZE | ES        | NES       | NOM.p.val | FDR.q.val | FWER.p.val |
|------|---------------------------------------------------|------|-----------|-----------|-----------|-----------|------------|
| 514  | GOBP-AMYLOID-BETA-METABOLIC-PROCESS               | 5    | 0.289564  | 0.604244  | 0.940549  | 0.965700  | 1.000      |
| 515  | GOBP-NEGATIVE-REGULATION-OF-MOLECULAR-FUNCTION    | 24   | 0.184592  | 0.603997  | 0.941038  | 0.964005  | 1.000      |
| 516  | GOBP-REGULATION-OF-MUSCLE-SYSTEM-PROCESS          | 8    | 0.243215  | 0.603157  | 0.939042  | 0.962822  | 1.000      |
| 517  | GOBP-REGULATION-OF-WNT-SIGNALING-PATHWAY          | 5    | 0.281555  | 0.601814  | 0.936556  | 0.961920  | 1.000      |
| 518  | GOBP-RESPIRATORY-SYSTEM-DEVELOPMENT               | 6    | 0.265806  | 0.587063  | 0.957353  | 0.970165  | 1.000      |
| 519  | GOBP-APOPTOTIC-PROCESS                            | 35   | 0.169580  | 0.578620  | 0.957882  | 0.973673  | 1.000      |
| 520  | REACTOME-L1CAM-INTERACTIONS                       | 5    | 0.271377  | 0.570881  | 0.960396  | 0.976358  | 1.000      |
| 521  | GOBP-BIOLOGICAL-PROCESS-INVOLVED-IN-SYMBIOTIC-... | 10   | 0.214721  | 0.560502  | 0.946721  | 0.980197  | 1.000      |
| 522  | GOBP-POSITIVE-REGULATION-OF-ORGANELLE-ORGANIZA... | 10   | 0.216285  | 0.559195  | 0.945637  | 0.978978  | 1.000      |
| 523  | GOBP-CIRCADIAN-REGULATION-OF-GENE-EXPRESSION      | 5    | 0.262878  | 0.559061  | 0.973643  | 0.977172  | 1.000      |
| 524  | GOBP-POSITIVE-REGULATION-OF-DEFENSE-RESPONSE      | 5    | 0.260620  | 0.548368  | 0.977612  | 0.980835  | 1.000      |
| 525  | GOBP-DEFENSE-RESPONSE-TO-OTHER-ORGANISM           | 5    | 0.252541  | 0.536454  | 0.977811  | 0.982412  | 1.000      |
| 526  | GOBP-REGULATION-OF-NEURON-DIFFERENTIATION         | 5    | 0.213048  | 0.530454  | 0.977811  | 0.982412  | 1.000      |
| 527  | GOBP-POSITIVE-REGULATION-OF-HYDROLASE-ACTIVITY    | 16   | 0.179520  | 0.531422  | 0.972863  | 0.982542  | 1.000      |
| 528  | GOBP-REGULATION-OF-HYDROLASE-ACTIVITY             | 22   | 0.160603  | 0.516395  | 0.973585  | 0.986325  | 1.000      |
| 529  | GOBP-NEGATIVE-REGULATION-OF-PROTEIN-CATABOLIC-... | 5    | 0.239233  | 0.503173  | 0.986804  | 0.988626  | 1.000      |
| 530  | GOBP-NEGATIVE-REGULATION-OF-RESPONSE-TO-STIMULUS  | 16   | 0.166973  | 0.500414  | 0.982984  | 0.987598  | 1.000      |
| 531  | GOBP-RESPONSE-TO-CALCIUM-ION                      | 6    | 0.210584  | 0.475114  | 0.995529  | 0.992004  | 1.000      |
| 532  | GOBP-PROTEOLYSIS                                  | 17   | 0.146049  | 0.437320  | 0.996134  | 0.995953  | 1.000      |
| 533  | GOBP-POSITIVE-REGULATION-OF-IMMUNE-RESPONSE       | 9    | -0.188828 | -0.575975 | 0.976510  | 0.972107  | 1.000      |
| 534  | GOBP-RESPONSE-TO-WOUNDING                         | 15   | -0.159585 | -0.602349 | 0.981482  | 0.963180  | 1.000      |
| 535  | GOBP-MALE-GAMETE-GENERATION                       | 5    | -0.253012 | -0.604289 | 0.949008  | 0.967070  | 1.000      |
| 536  | GOBP-CELLULAR-RESPONSE-TO-ORGANIC-CYCLIC-COMPOUND | 13   | -0.181751 | -0.645069 | 0.946360  | 0.942108  | 1.000      |
| 537  | GOBP-CYTOKINE-PRODUCTION                          | 10   | -0.215426 | -0.667603 | 0.894118  | 0.925952  | 1.000      |
| 538  | GOBP-IMMUNE-EFFECTOR-PROCESS                      | 11   | -0.207177 | -0.667842 | 0.904412  | 0.930700  | 1.000      |
| 539  | GOBP-REGULATION-OF-MUSCLE-CELL-DIFFERENTIATION    | 6    | -0.267445 | -0.679499 | 0.869318  | 0.923287  | 1.000      |
| 540  | GOBP-COAGULATION                                  | 8    | -0.239735 | -0.683345 | 0.856164  | 0.924074  | 1.000      |
| 541  | REACTOME-RNA-POLYMERASE-II-TRANSCRIPTION          | 20   | -0.165242 | -0.688255 | 0.863208  | 0.923626  | 1.000      |
| 542  | REACTOME-SIGNALING-BY-RHO-GTPASES-MIRO-GTPASES... | 9    | -0.229804 | -0.693671 | 0.855634  | 0.922112  | 1.000      |
| 543  | REACTOME-RHO-GTPASE-EFFECTORS                     | 9    | -0.229804 | -0.696166 | 0.876712  | 0.923845  | 1.000      |
| 544  | GOBP-POSITIVE-REGULATION-OF-CYTOKINE-PRODUCTION   | 7    | -0.249042 | -0.701150 | 0.880000  | 0.922560  | 1.000      |
| 545  | GOBP-REGULATION-OF-DEFENSE-RESPONSE               | 7    | -0.259259 | -0.705255 | 0.859060  | 0.922667  | 1.000      |
| 546  | GOBP-ORGANIC-HYDROXY-COMPOUND-TRANSPORT           | 6    | -0.279376 | -0.707951 | 0.854545  | 0.924173  | 1.000      |
| 547  | GOBP-REGULATION-OF-INFLAMMATORY-RESPONSE          | 7    | -0.259259 | -0.711584 | 0.865385  | 0.924286  | 1.000      |
| 548  | GOBP-TEMPERATURE-HOMEOSTASIS                      | 5    | -0.305944 | -0.725896 | 0.869048  | 0.909589  | 1.000      |
| 549  | GOBP-WOUND-HEALING                                | 13   | -0.213421 | -0.748554 | 0.816794  | 0.880911  | 1.000      |
| 550  | GOBP-MYELOID-LEUKOCYTE-ACTIVATION                 | 8    | -0.262500 | -0.767898 | 0.760274  | 0.855074  | 1.000      |
| 551  | GOBP-CELLULAR-RESPONSE-TO-STARVATION              | 5    | -0.323012 | -0.770891 | 0.728022  | 0.855034  | 1.000      |
| 552  | GOBP-NEGATIVE-REGULATION-OF-RESPONSE-TO-EXTERN... | 5    | -0.323012 | -0.773116 | 0.746988  | 0.856111  | 1.000      |
| 553  | GOBP-NEGATIVE-REGULATION-OF-CELL-DIFFERENTIATION  | 13   | -0.226667 | -0.782602 | 0.784000  | 0.845644  | 1.000      |
| 554  | GOBP-SMALL-MOLECULE-BIOSYNTHETIC-PROCESS          | 5    | -0.323012 | -0.784218 | 0.748538  | 0.847771  | 1.000      |
| 555  | GOBP-RESPONSE-TO-STARVATION                       | 5    | -0.331258 | -0.791858 | 0.764205  | 0.839568  | 1.000      |
| 556  | GOBP-EPHRIN-RECEPTOR-SIGNALING-PATHWAY            | 5    | -0.340670 | -0.811947 | 0.704478  | 0.809923  | 1.000      |

Continuation of Table S4

| NAME                                                  | ID            | SIZE | ES        | NES       | NOM.p.val | FDR.q.val | FWER.p.val |
|-------------------------------------------------------|---------------|------|-----------|-----------|-----------|-----------|------------|
| 557 GOBP-REGULATION-OF-GTPASE-ACTIVITY                | GO-0043087    | 5    | -0.343709 | -0.820182 | 0.678873  | 0.799053  | 1.000      |
| 558 REACTOME-EPH.EPHRIN-SIGNALING                     | R-RNO-2682334 | 6    | -0.328244 | -0.821177 | 0.625748  | 0.801913  | 1.000      |
| 559 GOBP-MUSCLE-CELL-PROLIFERATION                    | GO-0033002    | 8    | -0.284043 | -0.821714 | 0.678689  | 0.805852  | 1.000      |
| 560 GOBP-NEGATIVE-REGULATION-OF-DEVELOPMENTAL-PROCESS | GO-0051093    | 13   | -0.226667 | -0.825767 | 0.714286  | 0.803077  | 1.000      |
| 561 GOBP-ACTIVATION-OF-IMMUNE-RESPONSE                | GO-0002253    | 5    | -0.337878 | -0.830658 | 0.682584  | 0.798982  | 1.000      |
| 562 REACTOME-CELLULAR-RESPONSES-TO-EXTERNAL-STIMULI   | R-RNO-8953897 | 11   | -0.245370 | -0.831103 | 0.695971  | 0.803131  | 1.000      |
| 563 GOBP-MUSCLE-CONTRACTION                           | GO-0006936    | 5    | -0.349398 | -0.833371 | 0.657382  | 0.804169  | 1.000      |
| 564 GOBP-PLATELET-ACTIVATION                          | GO-0030168    | 6    | -0.320200 | -0.844788 | 0.647059  | 0.787952  | 1.000      |
| 565 GOBP-MUSCLE-CELL-DEVELOPMENT                      | GO-0055001    | 5    | -0.349398 | -0.845846 | 0.636905  | 0.790722  | 1.000      |
| 566 REACTOME-NEUTROPHIL-DEGRANULATION                 | R-RNO-6798695 | 6    | -0.329268 | -0.849573 | 0.639437  | 0.788395  | 1.000      |
| 567 GOBP-MYELOID-LEUKOCYTE-MEDIATED-IMMUNITY          | GO-0002444    | 6    | -0.329268 | -0.853905 | 0.635220  | 0.784900  | 1.000      |
| 568 GOBP-EPIDERMIS-DEVELOPMENT                        | GO-0008544    | 5    | -0.354236 | -0.854984 | 0.659824  | 0.788173  | 1.000      |
| 569 GOBP-ANATOMICAL-STRUCTURE-HOMEOSTASIS             | GO-0060249    | 7    | -0.315769 | -0.856115 | 0.652038  | 0.790838  | 1.000      |
| 570 GOBP-MYOTUBE-DIFFERENTIATION                      | GO-0014902    | 5    | -0.349398 | -0.861083 | 0.622159  | 0.786448  | 1.000      |
| 571 GOBP-CELL-ACTIVATION-INVOLVED-IN-IMMUNE-RESPONSE  | GO-0002263    | 6    | -0.329268 | -0.861579 | 0.613293  | 0.790653  | 1.000      |
| 572 GOBP-NEGATIVE-REGULATION-OF-MULTICELLULAR-ORGA... | GO-0051241    | 15   | -0.232877 | -0.875430 | 0.626556  | 0.769383  | 1.000      |
| 573 REACTOME-TOLL-LIKE-RECEPTOR-TLR1-TLR2-CASCADE     | R-RNO-168179  | 8    | -0.299598 | -0.877066 | 0.602007  | 0.771186  | 1.000      |
| 574 GOBP-RESPONSE-TO-INTERLEUKIN-1                    | GO-0070555    | 5    | -0.375340 | -0.879303 | 0.585987  | 0.771820  | 1.000      |
| 575 GOBP-REGULATION-OF-PROTEIN-BINDING                | GO-0043393    | 7    | -0.318666 | -0.879999 | 0.605863  | 0.775453  | 1.000      |
| 576 REACTOME-MYD88-INDEPENDENT-TLR4-CASCADE           | R-RNO-166166  | 8    | -0.299598 | -0.881266 | 0.600000  | 0.778104  | 1.000      |
| 577 REACTOME-TOLL-LIKE-RECEPTOR-CASCADES              | R-RNO-168898  | 8    | -0.299598 | -0.884229 | 0.585034  | 0.777513  | 1.000      |
| 578 REACTOME-TOLL-LIKE-RECEPTOR-9-TLR9-CASCADE        | R-RNO-168138  | 8    | -0.299598 | -0.887034 | 0.617857  | 0.776933  | 1.000      |
| 579 HALLMARK-UV-RESPONSE-UP                           | M5941         | 5    | -0.364515 | -0.891458 | 0.560976  | 0.773364  | 1.000      |
| 580 GOBP-CELL-ACTIVATION                              | GO-0001775    | 22   | -0.211768 | -0.893785 | 0.663507  | 0.774111  | 1.000      |
| 581 GOBP-CELL-CELL-JUNCTION-ASSEMBLY                  | GO-0007043    | 5    | -0.375193 | -0.898075 | 0.562327  | 0.771290  | 1.000      |
| 582 GOBP-SMOOTH-MUSCLE-CELL-PROLIFERATION             | GO-0048659    | 6    | -0.349740 | -0.905414 | 0.528701  | 0.761602  | 1.000      |
| 583 REACTOME-INFECTIOUS-DISEASE                       | R-HSA-5663205 | 12   | -0.269179 | -0.906936 | 0.617021  | 0.763898  | 1.000      |
| 584 REACTOME-INTERLEUKIN-17-SIGNALING                 | R-RNO-448424  | 6    | -0.350397 | -0.907289 | 0.563518  | 0.768446  | 1.000      |
| 585 GOBP-CELL-CELL-JUNCTION-ORGANIZATION              | GO-0045216    | 6    | -0.361652 | -0.916013 | 0.516923  | 0.755710  | 1.000      |
| 586 GOBP-CELL-CYCLE                                   | GO-0007049    | 21   | -0.224069 | -0.916324 | 0.594059  | 0.760482  | 1.000      |
| 587 GOBP-CELLULAR-GLUCOSE-HOMEOSTASIS                 | GO-0001678    | 5    | -0.385542 | -0.929404 | 0.530726  | 0.739660  | 1.000      |
| 588 REACTOME-LEISHMANIA-INFECTION                     | R-HSA-9658195 | 10   | -0.288306 | -0.930093 | 0.523298  | 0.743646  | 1.000      |
| 589 GOBP-POSITIVE-REGULATION-OF-APOPTOTIC-SIGNALIN... | GO-2001235    | 5    | -0.385542 | -0.936396 | 0.498507  | 0.736357  | 1.000      |
| 590 GOBP-SMALL-GTPASE-MEDIATED-SIGNAL-TRANSDUCTION    | GO-0007264    | 8    | -0.314810 | -0.944682 | 0.481967  | 0.724464  | 1.000      |
| 591 GOBP-PROTEIN-MODIFICATION-BY-SMALL-PROTEIN-CON... | GO-0032446    | 6    | -0.372679 | -0.958612 | 0.505119  | 0.701400  | 1.000      |
| 592 GOBP-POSITIVE-REGULATION-OF-SMOOTH-MUSCLE-CELL... | GO-0048661    | 5    | -0.397089 | -0.960690 | 0.485380  | 0.702536  | 1.000      |
| 593 GOBP-POSITIVE-REGULATION-OF-ESTABLISHMENT-OF-P... | GO-1904951    | 5    | -0.397590 | -0.963172 | 0.457865  | 0.702709  | 1.000      |
| 594 GOBP-POSITIVE-REGULATION-OF-CELL-DEATH            | GO-0010942    | 19   | -0.237932 | -0.965271 | 0.487562  | 0.703746  | 1.000      |
| 595 GOBP-LEUKOCYTE-MEDIATED-IMMUNITY                  | GO-0002443    | 8    | -0.337500 | -0.967306 | 0.465409  | 0.704833  | 1.000      |
| 596 REACTOME-EXTRACELLULAR-MATRIX-ORGANIZATION        | R-RNO-1474244 | 12   | -0.409639 | -0.974933 | 0.465181  | 0.699370  | 1.000      |
| 597 GOBP-MULTICELLULAR-ORGANISMAL-HOMEOSTASIS         | GO-0048871    | 5    | -0.280097 | -0.974933 | 0.471631  | 0.700343  | 1.000      |
| 598 REACTOME-DEVELOPMENTAL-BIOLOGY                    | R-RNO-1266738 | 22   | -0.229011 | -0.994125 | 0.464646  | 0.666714  | 1.000      |
| 599 GOBP-REGULATION-OF-CELL-DEVELOPMENT               | GO-0060284    | 15   | -0.275972 | -0.996611 | 0.442623  | 0.666626  | 1.000      |

Continuation of Table S4

| NAME                                                  | ID            | SIZE | ES        | NES       | NOM.p.val | FDR.q.val | FWER.p.val |
|-------------------------------------------------------|---------------|------|-----------|-----------|-----------|-----------|------------|
| 600 GOBP-RESPONSE.TO.MECHANICAL.STIMULUS              | GO-0009612    | 6    | -0.370349 | -1.000958 | 0.401961  | 0.663296  | 1.000      |
| 601 REACTOME.MAPK.TARGETS.NUCLEAR.EVENTS.MEDIATED.... | R-HSA-450282  | 5    | -0.427073 | -1.010663 | 0.404984  | 0.648941  | 1.000      |
| 602 GOBP-ENZYME.LINKED.RECEPTOR.PROTEIN.SIGNALING.... | GO-0007167    | 24   | -0.239507 | -1.012965 | 0.430622  | 0.649880  | 1.000      |
| 603 GOBP-REGULATION.OF.APOPTOTIC.SIGNALING.PATHWAY    | GO-2001233    | 10   | -0.317053 | -1.018732 | 0.400709  | 0.643467  | 1.000      |
| 604 GOBP-PERIPHERAL.NERVOUS.SYSTEM.DEVELOPMENT        | GO-0007422    | 9    | -0.330331 | -1.026445 | 0.401460  | 0.633681  | 1.000      |
| 605 GOBP-POSITIVE.REGULATION.OF.NEUROGENESIS          | GO-0005769    | 12   | -0.306182 | -1.031645 | 0.377863  | 0.628889  | 1.000      |
| 606 GOBP-POSITIVE.REGULATION.OF.MYELOID.LEUKOCYTE.... | GO-0002763    | 6    | -0.400289 | -1.033368 | 0.379009  | 0.630700  | 1.000      |
| 607 GOBP-REGULATION.OF.NEUROGENESIS                   | GO-0005767    | 14   | -0.280566 | -1.035793 | 0.404959  | 0.631054  | 1.000      |
| 608 GOBP-POSITIVE.REGULATION.OF.CELL.DEVELOPMENT      | GO-0010720    | 12   | -0.306182 | -1.040592 | 0.374016  | 0.626372  | 1.000      |
| 609 GOBP-OSTEOCLAST.DIFFERENTIATION                   | GO-00030316   | 6    | -0.398655 | -1.041748 | 0.368580  | 0.629273  | 1.000      |
| 610 GOBP-REGULATION.OF.CELL.DEATH                     | GO-0010941    | 34   | -0.221414 | -1.044157 | 0.424051  | 0.629500  | 1.000      |
| 611 GOBP-POSITIVE.REGULATION.OF.AXONOGENESIS          | GO-0005772    | 5    | -0.432755 | -1.044946 | 0.367953  | 0.633429  | 1.000      |
| 612 REACTOME.POST.TRANSLATIONAL.PROTEIN.MODIFICATION  | R-RNO-597592  | 7    | -0.387151 | -1.045708 | 0.380503  | 0.637423  | 1.000      |
| 613 GOBP-POSITIVE.REGULATION.OF.NERVOUS.SYSTEM.DEV... | GO-00051962   | 12   | -0.306182 | -1.055396 | 0.384328  | 0.622745  | 1.000      |
| 614 GOBP-RAS.PROTEIN.SIGNAL.TRANSDUCTION              | GO-0007265    | 5    | -0.439391 | -1.055553 | 0.329412  | 0.628025  | 1.000      |
| 615 REACTOME.DEATH.RECEPTOR.SIGNALING                 | R-RNO-73887   | 5    | -0.433693 | -1.058698 | 0.345238  | 0.627034  | 1.000      |
| 616 GOBP-POSITIVE.REGULATION.OF.PEPTIDASE.ACTIVITY    | GO-0010952    | 11   | -0.395062 | -1.061516 | 0.338870  | 0.627181  | 1.000      |
| 617 GOBP-CYTOSKELETON.ORGANIZATION                    | GO-0007010    | 7    | -0.316087 | -1.068483 | 0.338130  | 0.619281  | 1.000      |
| 618 GOBP-RESPONSE.TO.NITROGEN.COMPOUND                | GO-1901698    | 35   | -0.226016 | -1.068676 | 0.366120  | 0.624685  | 1.000      |
| 619 GOBP-POSITIVE.REGULATION.OF.CYSTEINE.TYPE.ENDO... | GO-2001056    | 7    | -0.395062 | -1.072599 | 0.356209  | 0.622193  | 1.000      |
| 620 GOBP-CHROMOSOME.ORGANIZATION                      | GO-0051276    | 10   | -0.414173 | -1.072910 | 0.346386  | 0.627431  | 1.000      |
| 621 GOBP-LYMPHOCYTE.ACTIVATION                        | GO-0046649    | 6    | -0.344968 | -1.073802 | 0.353175  | 0.631459  | 1.000      |
| 622 GOBP-REGULATION.OF.IMMUNE.SYSTEM.PROCESS          | GO-0002682    | 21   | -0.265290 | -1.074172 | 0.363636  | 0.636818  | 1.000      |
| 623 GOBP-MORPHOGENESIS.OF.AN.EPITHELIUM               | GO-0002009    | 6    | -0.400087 | -1.075064 | 0.333333  | 0.641270  | 1.000      |
| 624 REACTOME.ESR.MEDIATED.SIGNALING                   | R-RNO-8939211 | 8    | -0.378285 | -1.077997 | 0.348592  | 0.641440  | 1.000      |
| 625 REACTOME.INNATE.IMMUNE.SYSTEM                     | R-RNO-168249  | 16   | -0.293349 | -1.086835 | 0.320175  | 0.628400  | 1.000      |
| 626 GOBP-MEMBRANE.PROTEIN.PROTEOLYSIS                 | GO-0033619    | 6    | -0.415698 | -1.094225 | 0.355311  | 0.619253  | 1.000      |
| 627 GOBP-CELLULAR.RESPONSE.TO.CADMIUM.ION             | GO-0071276    | 5    | -0.446324 | -1.094698 | 0.312866  | 0.624410  | 1.000      |
| 628 GOBP-REGULATION.OF.GLIOGENESIS                    | GO-0014013    | 5    | -0.466353 | -1.106269 | 0.300000  | 0.606594  | 1.000      |
| 629 REACTOME.SIGNALING.BY.NUCLEAR.RECEPTORS           | R-RNO-9006931 | 8    | -0.378285 | -1.107596 | 0.279863  | 0.610250  | 1.000      |
| 630 GOBP-EXTRINSIC.APOPTOTIC.SIGNALING.PATHWAY        | GO-0097191    | 7    | -0.400746 | -1.121780 | 0.296667  | 0.587415  | 1.000      |
| 631 GOBP-ANATOMICAL.STRUCTURE.FORMATION.INVOLVED.I... | GO-0048646    | 20   | -0.278690 | -1.122635 | 0.290640  | 0.591693  | 1.000      |
| 632 GOBP-RESPONSE.TO.RADIATION                        | GO-0009314    | 13   | -0.319042 | -1.124602 | 0.280156  | 0.594011  | 1.000      |
| 633 GOBP-POSITIVE.REGULATION.OF.GLIOGENESIS           | GO-0014015    | 5    | -0.466353 | -1.128993 | 0.277008  | 0.591486  | 1.000      |
| 634 GOBP-FC.EPSILON.RECEPTOR.SIGNALING.PATHWAY        | GO-0038095    | 7    | -0.413386 | -1.131829 | 0.280000  | 0.592015  | 1.000      |
| 635 REACTOME.PTEN.REGULATION                          | R-RNO-6807070 | 18   | -0.286606 | -1.131897 | 0.263768  | 0.598427  | 1.000      |
| 636 GOBP-RESPONSE.TO.GROWTH.FACTOR                    | GO-0070848    | 5    | -0.479616 | -1.138306 | 0.232877  | 0.595350  | 1.000      |
| 637 GOBP-POSITIVE.REGULATION.OF.IMMUNE.SYSTEM.PROCESS | GO-0002684    | 18   | -0.291698 | -1.137879 | 0.280374  | 0.598674  | 1.000      |
| 638 GOBP-RESPONSE.TO.CADMIUM.ION                      | GO-0046686    | 6    | -0.441754 | -1.139080 | 0.262500  | 0.602763  | 1.000      |
| 639 REACTOME.TRANSCRIPTIONAL.REGULATION.BY_TP53       | R-RNO-3700989 | 7    | -0.413386 | -1.142261 | 0.264151  | 0.603174  | 1.000      |
| 640 REACTOME.FC.EPSILON.RECEPTOR.FCER1.SIGNALING      | R-RNO-2454202 | 6    | -0.413386 | -1.142427 | 0.267516  | 0.609959  | 1.000      |
| 641 GOBP-POSITIVE.REGULATION.OF.BINDING               | GO-0051099    | 6    | -0.451219 | -1.147463 | 0.266862  | 0.607015  | 1.000      |
| 642 GOBP-OSSIFICATION                                 | GO-0001503    | 9    | -0.366621 | -1.148862 | 0.282609  | 0.611302  | 1.000      |

Continuation of Table S4

| NAME | ID                                                | SIZE | ES        | NES       | NOM.p.val | FDR.q.val | FWER.p.val |
|------|---------------------------------------------------|------|-----------|-----------|-----------|-----------|------------|
| 643  | GOBP-CYTOKINE-MEDIATED-SIGNALING-PATHWAY          | 16   | -0.303124 | -1.153110 | 0.230047  | 0.609363  | 1.000      |
| 644  | GOBP-ACTIN-FILAMENT-BASED-PROCESS                 | 7    | -0.421261 | -1.168487 | 0.224684  | 0.583591  | 1.000      |
| 645  | GOBP-CELLULAR-COMPONENT-DISSEMBLY                 | 6    | -0.455885 | -1.169941 | 0.241477  | 0.587911  | 1.000      |
| 646  | GOBP-CELLULAR-RESPONSE-TO-REACTIVE-OXYGEN-SPECIES | 7    | -0.417888 | -1.174072 | 0.237342  | 0.585748  | 1.000      |
| 647  | GOBP-RESPONSE-TO-EXTRACELLULAR-STIMULUS           | 13   | -0.339753 | -1.177354 | 0.269373  | 0.586415  | 1.000      |
| 648  | GOBP-RESPONSE-TO-INSULIN                          | 5    | -0.488647 | -1.179358 | 0.246106  | 0.589561  | 1.000      |
| 649  | GOBP-TISSUE-HOMEOSTASIS                           | 5    | -0.497384 | -1.179904 | 0.240223  | 0.596054  | 1.000      |
| 650  | GOBP-CHROMATIN-ORGANIZATION                       | 5    | -0.493709 | -1.183317 | 0.244957  | 0.596025  | 1.000      |
| 651  | GOBP-TISSUE-MORPHOGENESIS                         | 7    | -0.436807 | -1.187540 | 0.245734  | 0.594620  | 1.000      |
| 652  | GOBP-CELLULAR-RESPONSE-TO-CHEMICAL-STRESS         | 7    | -0.417888 | -1.189496 | 0.256944  | 0.598258  | 1.000      |
| 653  | GOBP-REGULATION-OF-MULTICELLULAR-ORGANISMAL-DE... | 31   | -0.255009 | -1.198794 | 0.236559  | 0.585902  | 1.000      |
| 654  | GOBP-POSITIVE-REGULATION-OF-CELL-POPULATION.PR... | 21   | -0.287913 | -1.199113 | 0.206731  | 0.593254  | 1.000      |
| 655  | GOBP-REGULATION-OF-MYELOID-LEUKOCYTE-DIFFERENT... | 8    | -0.412065 | -1.204109 | 0.241830  | 0.590916  | 1.000      |
| 656  | REACTOME-SIGNALING-BY-INTERLEUKINS                | 15   | -0.322242 | -1.209148 | 0.181818  | 0.587908  | 1.000      |
| 657  | GOBP-REGULATION-OF-CELL-DIFFERENTIATION           | 36   | -0.249838 | -1.216149 | 0.140449  | 0.581392  | 1.000      |
| 658  | GOBP-POSITIVE-REGULATION-OF-MYELOID-CELL-DIFFE... | 7    | -0.436005 | -1.230284 | 0.190635  | 0.559466  | 1.000      |
| 659  | GOBP-POSITIVE-REGULATION-OF-MULTICELLULAR-ORGA... | 32   | -0.271307 | -1.248364 | 0.175325  | 0.530099  | 1.000      |
| 660  | HALLMARK-EPITHELIAL-MESENCHYMAL-TRANSITION        | 5    | -0.536923 | -1.250161 | 0.236760  | 0.534576  | 1.000      |
| 661  | GOBP-POSITIVE-REGULATION-OF-HEMOPOIESIS           | 7    | -0.458349 | -1.264510 | 0.175258  | 0.512463  | 1.000      |
| 662  | GOBP-REGULATION-OF-IMMUNE-RESPONSE                | 12   | -0.369298 | -1.266751 | 0.170455  | 0.516138  | 1.000      |
| 663  | GOBP-PROTEIN-MODIFICATION-BY-SMALL-PROTEIN.CON... | 7    | -0.475190 | -1.279417 | 0.185668  | 0.500196  | 1.000      |
| 664  | GOBP-CELLULAR-RESPONSE-TO-EXTRACELLULAR-STIMULUS  | 8    | -0.437326 | -1.280897 | 0.165644  | 0.505768  | 1.000      |
| 665  | GOBP-RESPONSE-TO-OXYGEN-CONTAINING-COMPOUND       | 39   | -0.270379 | -1.285677 | 0.099338  | 0.504316  | 1.000      |
| 666  | GOBP-T-CELL-ACTIVATION                            | 8    | -0.439503 | -1.286534 | 0.182131  | 0.510840  | 1.000      |
| 667  | GOBP-RESPONSE-TO-ORGANIC-CYCLIC-COMPOUND          | 20   | -0.318332 | -1.296448 | 0.113122  | 0.498692  | 1.000      |
| 668  | GOBP-REGULATION-OF-MYELOID-CELL-DIFFERENTIATION   | 9    | -0.405586 | -1.298127 | 0.157718  | 0.503615  | 1.000      |
| 669  | GOBP-REGULATION-OF-VASCULAR-ASSOCIATED-SMOOTH...  | 5    | -0.549071 | -1.306645 | 0.175385  | 0.496260  | 1.000      |
| 670  | GOBP-MYELOID-LEUKOCYTE-DIFFERENTIATION            | 11   | -0.399629 | -1.328862 | 0.131579  | 0.462058  | 1.000      |
| 671  | GOBP-RESPONSE-TO-HORMONE                          | 20   | -0.324517 | -1.331026 | 0.111111  | 0.466799  | 1.000      |
| 672  | GOBP-RESPONSE-TO-CYTOKINE                         | 23   | -0.308332 | -1.347236 | 0.091398  | 0.444507  | 1.000      |
| 673  | GOBP-REGULATION-OF-BINDING                        | 11   | -0.413449 | -1.350367 | 0.128405  | 0.447349  | 1.000      |
| 674  | GOBP-TRANSMEMBRANE-RECEPTOR-PROTEIN-SERINE.THR... | 6    | -0.516218 | -1.352945 | 0.109325  | 0.451276  | 1.000      |
| 675  | GOBP-MUSCLE-STRUCTURE-DEVELOPMENT                 | 16   | -0.361520 | -1.363159 | 0.105932  | 0.441367  | 1.000      |
| 676  | GOBP-NEGATIVE-REGULATION-OF-BIOSYNTHETIC-PROCESS  | 13   | -0.394169 | -1.382312 | 0.072340  | 0.416233  | 1.000      |
| 677  | GOBP-NEGATIVE-REGULATION-OF-BINDING               | 6    | -0.544758 | -1.383101 | 0.111111  | 0.423661  | 1.000      |
| 678  | GOBP-RESPONSE-TO-OXIDATIVE-STRESS                 | 8    | -0.489727 | -1.386331 | 0.126582  | 0.427093  | 1.000      |
| 679  | GOBP-POSITIVE-REGULATION-OF-CELL-DIFFERENTIATION  | 27   | -0.315492 | -1.389635 | 0.070270  | 0.430220  | 1.000      |
| 680  | GOBP-NEGATIVE-REGULATION-OF-NUCLEOBASE-CONTAIN... | 13   | -0.404594 | -1.398318 | 0.083333  | 0.423333  | 1.000      |
| 681  | REACTOME-SIGNALING-BY-RECEPTOR-TYROSINE-KINASES   | 26   | -0.320548 | -1.405331 | 0.057292  | 0.420120  | 1.000      |
| 682  | GOBP-CELL-POPULATION-PROLIFERATION                | 32   | -0.296713 | -1.405551 | 0.052632  | 0.429693  | 1.000      |
| 683  | GOBP-REGULATION-OF-LEUKOCYTE-DIFFERENTIATION      | 9    | -0.465637 | -1.435693 | 0.058419  | 0.385548  | 1.000      |
| 684  | GOBP-RESPONSE-TO-REACTIVE-OXYGEN-SPECIES          | 8    | -0.489727 | -1.443211 | 0.078550  | 0.382528  | 1.000      |
| 685  | REACTOME-TRANSCRIPTIONAL-REGULATION-OF_WHITE.A... | 6    | -0.550593 | -1.447679 | 0.087379  | 0.384890  | 1.000      |



Continuation of Table S4

| NAME                                                  | ID            | SIZE | ES        | NES       | NOM.p.val | FDR.q.val | FWER.p.val |
|-------------------------------------------------------|---------------|------|-----------|-----------|-----------|-----------|------------|
| 686 GOBP-RESPONSE-TO-DRUG                             | GO-0042493    | 11   | -0.441015 | -1.449566 | 0.090909  | 0.391519  | 1.000      |
| 687 REACTOME-CELLULAR-SENESCENCE                      | R-RNO-2559583 | 6    | -0.569835 | -1.453079 | 0.092879  | 0.395006  | 1.000      |
| 688 REACTOME-SIGNALING-BY-NTRKS                       | R-RNO-166520  | 18   | -0.375880 | -1.453213 | 0.090129  | 0.405507  | 1.000      |
| 689 REACTOME-SENESCENCE-ASSOCIATED-SECRETORY-PHENO... | R-RNO-2559582 | 6    | -0.569835 | -1.457702 | 0.098765  | 0.408737  | 1.000      |
| 690 GOBP-IMMUNE-RESPONSE-REGULATING-SIGNALING-PATHWAY | GO-0002764    | 8    | -0.514187 | -1.458344 | 0.100000  | 0.419044  | 1.000      |
| 691 GOBP-REGULATION-OF-CELL-CYCLE                     | GO-0051726    | 13   | -0.410605 | -1.475922 | 0.058577  | 0.399975  | 1.000      |
| 692 GOBP-RESPONSE-TO-MONOSACCHARIDE                   | GO-0034284    | 5    | -0.620622 | -1.485674 | 0.073016  | 0.394405  | 1.000      |
| 693 GOBP-INTRACELLULAR-RECEPTOR-SIGNALING-PATHWAY     | GO-0030522    | 5    | -0.621166 | -1.493768 | 0.066852  | 0.392506  | 1.000      |
| 694 GOBP-FC-RECEPTOR-SIGNALING-PATHWAY                | GO-0038093    | 8    | -0.514187 | -1.493961 | 0.025078  | 0.404713  | 1.000      |
| 695 GOBP-MUSCLE-ORGAN-DEVELOPMENT                     | GO-0007517    | 9    | -0.489522 | -1.494685 | 0.073801  | 0.417114  | 1.000      |
| 696 GOBP-RESPONSE-TO-CARBOHYDRATE                     | GO-0009743    | 5    | -0.620622 | -1.495151 | 0.058140  | 0.430526  | 1.000      |
| 697 GOBP-REGULATION-OF-HEMOPOIESIS                    | GO-1903706    | 10   | -0.459472 | -1.500683 | 0.069536  | 0.435305  | 1.000      |
| 698 GOBP-MUSCLE-TISSUE-DEVELOPMENT                    | GO-0060537    | 11   | -0.462851 | -1.504660 | 0.040293  | 0.443553  | 1.000      |
| 699 REACTOME-INTERLEUKIN-4-AND-INTERLEUKIN-13-SIGN... | R-RNO-6785807 | 8    | -0.522996 | -1.522088 | 0.055172  | 0.425226  | 1.000      |
| 700 GOBP-RESPONSE-TO-NUTRIENT                         | GO-0007584    | 5    | -0.631836 | -1.545407 | 0.074850  | 0.396988  | 1.000      |
| 701 GOBP-APOPTOTIC-SIGNALING-PATHWAY                  | GO-0097190    | 15   | -0.422598 | -1.571189 | 0.035433  | 0.369499  | 1.000      |
| 702 GOBP-MYELOID-CELL-DIFFERENTIATION                 | GO-0030099    | 13   | -0.436857 | -1.576361 | 0.037190  | 0.376092  | 1.000      |
| 703 GOBP-DEVELOPMENTAL-CELL-GROWTH                    | GO-0048588    | 5    | -0.663419 | -1.590167 | 0.062130  | 0.369014  | 1.000      |
| 704 GOBP-NEGATIVE-REGULATION-OF-CELL-CYCLE            | GO-0045786    | 5    | -0.676551 | -1.602648 | 0.050595  | 0.365528  | 1.000      |
| 705 GOBP-SKELETAL-MUSCLE-ORGAN-DEVELOPMENT            | GO-0060538    | 5    | -0.674408 | -1.640210 | 0.043732  | 0.321373  | 0.999      |
| 706 GOBP-RESPONSE-TO-ENDOGENOUS-STIMULUS              | GO-0009719    | 34   | -0.365070 | -1.694751 | 0.005650  | 0.259520  | 0.996      |
| 707 GOBP-PEPTIDYL-LYSINE-MODIFICATION                 | GO-0018205    | 5    | -0.711289 | -1.709858 | 0.022152  | 0.255432  | 0.994      |
| 708 GOBP-SKIN-DEVELOPMENT                             | GO-0043588    | 5    | -0.734940 | -1.711968 | 0.040816  | 0.267747  | 0.993      |
| 709 GOBP-POSITIVE-REGULATION-OF-NEURON-DEATH          | GO-1901216    | 5    | -0.733208 | -1.733205 | 0.019417  | 0.250635  | 0.985      |
| 710 HALLMARK-HYPOXIA                                  | M5891         | 5    | -0.748829 | -1.780366 | 0.012158  | 0.209527  | 0.967      |
| 711 GOBP-NEGATIVE-REGULATION-OF-CELL-POPULATION-PR... | GO-0008285    | 9    | -0.589598 | -1.819714 | 0.009836  | 0.178189  | 0.937      |
| 712 REACTOME-NUCLEAR-EVENTS-KINASE-AND-TRANSCRIPTI... | R-RNO-198725  | 11   | -0.558108 | -1.851278 | 0.006873  | 0.157446  | 0.896      |
| 713 GOBP-NEGATIVE-REGULATION-OF-TRANSCRIPTION-BY-R... | GO-0000122    | 10   | -0.556441 | -1.857109 | 0.007407  | 0.164463  | 0.893      |
| 714 GOBP-LEUKOCYTE-DIFFERENTIATION                    | GO-0002521    | 15   | -0.512902 | -1.880018 | 0.004310  | 0.154865  | 0.848      |
| 715 GOBP-POSITIVE-REGULATION-OF-NUCLEOBASE-CONTAIN... | GO-0045935    | 28   | -0.432931 | -1.977779 | 0.000000  | 0.082897  | 0.595      |
| 716 REACTOME-NGF-STIMULATED-TRANSCRIPTION             | R-RNO-9031628 | 9    | -0.661777 | -2.011560 | 0.014235  | 0.069736  | 0.493      |
| 717 GOBP-IMMUNE-SYSTEM-DEVELOPMENT                    | GO-0002520    | 17   | -0.504553 | -2.013322 | 0.000000  | 0.077424  | 0.489      |
| 718 HALLMARK-APOPTOSIS                                | M5902         | 6    | -0.792848 | -2.064126 | 0.003185  | 0.057833  | 0.346      |
| 719 GOBP-POSITIVE-REGULATION-OF-BIOSYNTHETIC-PROCESS  | GO-0009891    | 27   | -0.472440 | -2.094931 | 0.000000  | 0.052790  | 0.282      |
| 720 GOBP-MONONUCLEAR-CELL-DIFFERENTIATION             | GO-1903131    | 7    | -0.801532 | -2.108012 | 0.003155  | 0.057605  | 0.261      |
| 721 GOBP-POSITIVE-REGULATION-OF-TRANSCRIPTION-BY-R... | GO-0045944    | 24   | -0.516244 | -2.263185 | 0.000000  | 0.013703  | 0.056      |
| 722 GOBP-POSITIVE-REGULATION-OF-PRIMRNA-TRANSCRI...   | GO-1902895    | 7    | -0.805455 | -2.266591 | 0.000000  | 0.017004  | 0.052      |
| 723 GOBP-PRIMRNA-TRANSCRIPTION-BY-RNA-POLYMERASE-II   | GO-0061614    | 7    | -0.805455 | -2.273288 | 0.000000  | 0.022732  | 0.046      |
| 724 HALLMARK-TNFA-SIGNALING-VIA-NFKB                  | M5890         | 14   | -0.760351 | -2.751684 | 0.000000  | 0.000000  | 0.000      |

End of Table

**Supplementary Table S5: SC caudal segment early (1 DPL peak) profile GSEA results.**

| Begin of Table S5 |                                                    |               |      |          |          |           |           |            |       |
|-------------------|----------------------------------------------------|---------------|------|----------|----------|-----------|-----------|------------|-------|
|                   | NAME                                               | ID            | SIZE | ES       | NES      | NOM.p.val | FDR.q.val | FWER.p.val |       |
| 0                 | REACTOME_INTERLEUKIN_4_AND_INTERLEUKIN_13_SIGN...  | R-RNO-6785807 | 8    | 0.900000 | 2.823968 | 0.000000  | 0.000000  | 0.00000    | 0.000 |
| 1                 | REACTOME_SIGNALING_BY_INTERLEUKINS                 | R-RNO-449147  | 15   | 0.571289 | 2.286192 | 0.003788  | 0.090280  | 0.090280   | 0.118 |
| 2                 | GOBP_CYTOKINE_MEDIATED_SIGNALING_PATHWAY           | GO:0019221    | 16   | 0.555290 | 2.273639 | 0.000000  | 0.066719  | 0.066719   | 0.129 |
| 3                 | GOBP_NEGATIVE_REGULATION_OF_PEPTIDASE_ACTIVITY     | GO:0010466    | 6    | 0.816037 | 2.221286 | 0.000000  | 0.073200  | 0.073200   | 0.185 |
| 4                 | REACTOME_TRANSCRIPTIONAL_REGULATION_OF_WHITE_A...  | R-RNO-381340  | 6    | 0.764970 | 2.095562 | 0.006211  | 0.152611  | 0.152611   | 0.419 |
| 5                 | GOBP_CELLULAR_RESPONSE_TO_EXTERNAL_STIMULUS        | GO:0071496    | 10   | 0.593990 | 2.048613 | 0.000000  | 0.177395  | 0.177395   | 0.537 |
| 6                 | GOBP_NEGATIVE_REGULATION_OF_CELL_POPULATION_PR...  | GO:0008285    | 9    | 0.620253 | 2.026670 | 0.003247  | 0.176840  | 0.176840   | 0.595 |
| 7                 | GOBP_ACTIN_FILAMENT_BASED_PROCESS                  | GO:0030029    | 7    | 0.675066 | 1.991510 | 0.005900  | 0.193944  | 0.193944   | 0.679 |
| 8                 | GOBP_NEGATIVE_REGULATION_OF_CYSSTEINE_TYPE_ENDO... | GO:2000117    | 5    | 0.789750 | 1.990752 | 0.005362  | 0.173334  | 0.173334   | 0.682 |
| 9                 | GOBP_NEGATIVE_REGULATION_OF_LOCOMOTION             | GO:0040013    | 5    | 0.723951 | 1.874701 | 0.008197  | 0.298478  | 0.298478   | 0.877 |
| 10                | REACTOME_DEATH_RECEPTOR_SIGNALING                  | R-RNO-73887   | 5    | 0.739534 | 1.873302 | 0.005479  | 0.274196  | 0.274196   | 0.880 |
| 11                | GOBP_NEGATIVE_REGULATION_OF_PROTEOLYSIS            | GO:0045861    | 8    | 0.612182 | 1.856347 | 0.006579  | 0.276496  | 0.276496   | 0.906 |
| 12                | GOBP_RESPONSE_TO_UV                                | GO:0009411    | 5    | 0.727498 | 1.797517 | 0.022989  | 0.348180  | 0.348180   | 0.961 |
| 13                | GOBP_MYELOID_CELL_DIFFERENTIATION                  | GO:0030099    | 13   | 0.475357 | 1.794794 | 0.015385  | 0.328435  | 0.328435   | 0.964 |
| 14                | GOBP_RESPONSE_TO_CYTOKINE                          | GO:0030497    | 23   | 0.392093 | 1.771658 | 0.008230  | 0.344624  | 0.344624   | 0.978 |
| 15                | GOBP_RESPONSE_TO_REACTIVE_OXYGEN_SPECIES           | GO:000302     | 8    | 0.550213 | 1.762561 | 0.018519  | 0.340836  | 0.340836   | 0.982 |
| 16                | GOBP_RESPONSE_TO_OXIDATIVE_STRESS                  | GO:0006979    | 8    | 0.550213 | 1.754301 | 0.018750  | 0.335511  | 0.335511   | 0.984 |
| 17                | REACTOME_CYTOKINE_SIGNALING_IN_IMMUNE_SYSTEM       | R-RNO-1280215 | 21   | 0.391720 | 1.739955 | 0.008403  | 0.341276  | 0.341276   | 0.991 |
| 18                | GOBP_REGULATION_OF_APOPTOTIC_SIGNALING_PATHWAY     | GO:2001233    | 10   | 0.500000 | 1.708110 | 0.019355  | 0.381782  | 0.381782   | 0.996 |
| 19                | GOBP_SKIN_DEVELOPMENT                              | GO:0043588    | 5    | 0.686747 | 1.705049 | 0.025352  | 0.367950  | 0.367950   | 0.997 |
| 20                | HALLMARK_ALLOGRAFT_REJECTION                       | M5950         | 7    | 0.566357 | 1.680803 | 0.030960  | 0.396453  | 0.396453   | 0.999 |
| 21                | GOBP_INTRINSIC_APOPTOTIC_SIGNALING_PATHWAY         | GO:0097193    | 5    | 0.674699 | 1.648582 | 0.033846  | 0.445877  | 0.445877   | 0.999 |
| 22                | GOBP_APOPTOTIC_SIGNALING_PATHWAY                   | GO:0097190    | 15   | 0.403995 | 1.641462 | 0.028455  | 0.441697  | 0.441697   | 0.999 |
| 23                | GOBP_CELLULAR_RESPONSE_TO_EXTRACELLULAR_STIMULUS   | GO:0031668    | 8    | 0.526805 | 1.628601 | 0.035714  | 0.450763  | 0.450763   | 0.999 |
| 24                | GOBP_OSSIFICATION                                  | GO:0001503    | 9    | 0.482868 | 1.605176 | 0.047170  | 0.484874  | 0.484874   | 0.999 |
| 25                | GOBP_RESPONSE_TO_EXTRACELLULAR_STIMULUS            | GO:0009991    | 13   | 0.418596 | 1.598865 | 0.036232  | 0.480784  | 0.480784   | 0.999 |
| 26                | HALLMARK_TNFA_SIGNALING_VIA_NFKB                   | M5890         | 14   | 0.413644 | 1.595161 | 0.029091  | 0.471631  | 0.471631   | 0.999 |
| 27                | GOBP_POSITIVE_REGULATION_OF_PRL_MIRNA_TRANSCRI...  | GO:1902895    | 7    | 0.530135 | 1.593852 | 0.043605  | 0.456894  | 0.456894   | 0.999 |
| 28                | GOBP_MYELOID_LEUKOCYTE_DIFFERENTIATION             | GO:0002573    | 11   | 0.435931 | 1.570542 | 0.058824  | 0.493213  | 0.493213   | 1.000 |
| 29                | GOBP_RESPONSE_TO_NUTRIENT                          | GO:0007584    | 5    | 0.612976 | 1.557176 | 0.060694  | 0.507076  | 0.507076   | 1.000 |
| 30                | GOBP_NEGATIVE_REGULATION_OF_MOLECULAR_FUNCTION     | GO:0044092    | 24   | 0.343750 | 1.554876 | 0.015625  | 0.496320  | 0.496320   | 1.000 |
| 31                | GOBP_PRL_MIRNA_TRANSCRIPTION_BY_RNA_POLYMERASE_II  | GO:0061614    | 7    | 0.530135 | 1.546847 | 0.061350  | 0.498314  | 0.498314   | 1.000 |
| 32                | GOBP_MULTICELLULAR_ORGANISM_PROCESS                | GO:0044706    | 8    | 0.487356 | 1.534747 | 0.055556  | 0.512907  | 0.512907   | 1.000 |
| 33                | GOBP_IMMUNE_SYSTEM_DEVELOPMENT                     | GO:0002520    | 17   | 0.355993 | 1.527235 | 0.055118  | 0.515177  | 0.515177   | 1.000 |
| 34                | GOBP_POSITIVE_REGULATION_OF_APOPTOTIC_SIGNALIN...  | GO:2001235    | 5    | 0.602410 | 1.505491 | 0.058011  | 0.551057  | 0.551057   | 1.000 |
| 35                | GOBP_EMBRYONIC_ORGAN_DEVELOPMENT                   | GO:0048568    | 7    | 0.504034 | 1.501317 | 0.063063  | 0.545638  | 0.545638   | 1.000 |
| 36                | GOBP_NEGATIVE_REGULATION_OF_TRANSMEMBRANE_TRAN...  | GO:0034763    | 6    | 0.536585 | 1.498759 | 0.076923  | 0.536515  | 0.536515   | 1.000 |
| 37                | GOBP_MORPHOGENESIS_OF_AN_EPITHELIUM                | GO:0002009    | 6    | 0.530992 | 1.492660 | 0.062500  | 0.536384  | 0.536384   | 1.000 |
| 38                | GOBP_POSITIVE_REGULATION_OF_SMOOTH_MUSCLE_CELL...  | GO:0003661    | 5    | 0.592994 | 1.488849 | 0.083102  | 0.531884  | 0.531884   | 1.000 |
| 39                | GOBP_OSTEOCLAST_DIFFERENTIATION                    | GO:0030316    | 6    | 0.549064 | 1.484741 | 0.071207  | 0.529290  | 0.529290   | 1.000 |
| 40                | GOBP_INFLAMMATORY_RESPONSE                         | GO:0006954    | 12   | 0.411237 | 1.479026 | 0.061151  | 0.530103  | 0.530103   | 1.000 |

Continuation of Table S5

| NAME | ID                                                | SIZE       | ES | NES      | NOM.p.val | FDR.q.val | FWER.p.val |
|------|---------------------------------------------------|------------|----|----------|-----------|-----------|------------|
| 41   | GOBP-NEGATIVE-REGULATION-OF-HYDROLASE-ACTIVITY    | GO-0051346 | 11 | 0.409301 | 1.471043  | 0.047273  | 0.534891   |
| 42   | GOBP-CYTOSKELETON-ORGANIZATION                    | GO-0007010 | 11 | 0.409713 | 1.466986  | 0.056106  | 0.532329   |
| 43   | GOBP-NEGATIVE-REGULATION-OF-APOPTOTIC-SIGNALIN... | GO-2001234 | 7  | 0.505028 | 1.461049  | 0.087097  | 0.534633   |
| 44   | GOBP-OSTEOBLAST-DIFFERENTIATION                   | GO-0001649 | 5  | 0.567340 | 1.452899  | 0.090361  | 0.541441   |
| 45   | GOBP-RESPONSE-TO-CADMIUM-ION                      | GO-0046686 | 6  | 0.523728 | 1.451341  | 0.083601  | 0.534130   |
| 46   | GOBP-TISSUE-MORPHOGENESIS                         | GO-0048729 | 7  | 0.495947 | 1.449420  | 0.097701  | 0.526783   |
| 47   | HALLMARK-HYPOXIA                                  | M5891      | 5  | 0.560713 | 1.430652  | 0.096210  | 0.560242   |
| 48   | GOBP-CELLULAR-RESPONSE-TO-CHEMICAL-STRESS         | GO-0062197 | 7  | 0.480599 | 1.424055  | 0.088889  | 0.566466   |
| 49   | HALLMARK-APOPTOSIS                                | M5902      | 6  | 0.516166 | 1.407320  | 0.078947  | 0.595930   |
| 50   | GOBP-NEGATIVE-REGULATION-OF-PHOSPHORUS-METABOL... | GO-0010563 | 9  | 0.417722 | 1.405140  | 0.114187  | 0.590142   |
| 51   | GOBP-CELLULAR-RESPONSE-TO-REACTIVE-OXYGEN-SPECIES | GO-0034614 | 7  | 0.480599 | 1.403380  | 0.113043  | 0.583102   |
| 52   | GOBP-EXTRINSIC-APOPTOTIC-SIGNALING-PATHWAY        | GO-0097191 | 7  | 0.481481 | 1.400552  | 0.103152  | 0.579550   |
| 53   | GOBP-POSITIVE-REGULATION-OF-AXONOGENESIS          | GO-0050772 | 5  | 0.566265 | 1.399012  | 0.128527  | 0.572659   |
| 54   | GOBP-REGULATION-OF-PEPTIDASE-ACTIVITY             | GO-0052547 | 10 | 0.410726 | 1.391193  | 0.104377  | 0.582379   |
| 55   | GOBP-REGULATION-OF-LIPASE-ACTIVITY                | GO-0060191 | 6  | 0.500000 | 1.389767  | 0.109145  | 0.575741   |
| 56   | GOBP-CELLULAR-RESPONSE-TO-CADMIUM-ION             | GO-0071276 | 5  | 0.545887 | 1.387220  | 0.123711  | 0.570731   |
| 57   | GOBP-SMOOTH-MUSCLE-CELL-PROLIFERATION             | GO-0048659 | 6  | 0.491024 | 1.378732  | 0.112903  | 0.581253   |
| 58   | GOBP-NEUROTROPHIN-SIGNALING-PATHWAY               | GO-0038179 | 6  | 0.500000 | 1.369896  | 0.097561  | 0.592883   |
| 59   | GOBP-NEUROTROPHIN-TRK-RECEPTOR-SIGNALING-PATHWAY  | GO-0048011 | 6  | 0.500000 | 1.367410  | 0.114114  | 0.588689   |
| 60   | GOBP-NEGATIVE-REGULATION-OF-PROTEIN-METABOLIC-... | GO-0051248 | 20 | 0.299452 | 1.356166  | 0.111111  | 0.610093   |
| 61   | GOBP-REGULATION-OF-GTPASE-ACTIVITY                | GO-0043087 | 5  | 0.530120 | 1.355659  | 0.109290  | 0.601652   |
| 62   | GOBP-LEUKOCYTE-DIFFERENTIATION                    | GO-0002521 | 15 | 0.344040 | 1.354841  | 0.100000  | 0.594512   |
| 63   | GOBP-MUSCLE-CELL-PROLIFERATION                    | GO-0033002 | 8  | 0.448356 | 1.349043  | 0.129412  | 0.598568   |
| 64   | GOBP-REGULATION-OF-PROTEIN-BINDING                | GO-0043393 | 7  | 0.453202 | 1.345939  | 0.123123  | 0.597514   |
| 65   | GOBP-NEGATIVE-REGULATION-OF-TRANSCRIPTION-BY-R... | GO-000122  | 10 | 0.392040 | 1.340041  | 0.128028  | 0.601577   |
| 66   | GOBP-REGULATION-OF-PHOSPHOLIPASE-ACTIVITY         | GO-0010517 | 6  | 0.500000 | 1.330905  | 0.162500  | 0.614208   |
| 67   | GOBP-MEMBRANE-PROTEIN-PROTEOLYSIS                 | GO-0033619 | 6  | 0.471322 | 1.325873  | 0.128743  | 0.617713   |
| 68   | GOBP-REGULATION-OF-EXTRINSIC-APOPTOTIC-SIGNALI... | GO-2001236 | 6  | 0.475610 | 1.325399  | 0.142424  | 0.610106   |
| 69   | GOBP-MONOSACCHARIDE-METABOLIC-PROCESS             | GO-0005996 | 6  | 0.475610 | 1.317874  | 0.137026  | 0.620150   |
| 70   | GOBP-PROTEOLYSIS                                  | GO-0006508 | 17 | 0.318077 | 1.316853  | 0.127273  | 0.613628   |
| 71   | GOBP-POSITIVE-REGULATION-OF-PEPTIDYL-SERINE-PH... | GO-0033138 | 8  | 0.425000 | 1.316799  | 0.136519  | 0.605202   |
| 72   | GOBP-REGULATION-OF-PEPTIDYL-SERINE-PHOSPHORYLA... | GO-0033135 | 8  | 0.425000 | 1.313251  | 0.155172  | 0.605491   |
| 73   | GOBP-GLUCOSE-METABOLIC-PROCESS                    | GO-0006006 | 6  | 0.475610 | 1.306552  | 0.144809  | 0.613936   |
| 74   | GOBP-NEGATIVE-REGULATION-OF-CATALYTIC-ACTIVITY    | GO-0043086 | 17 | 0.317780 | 1.301923  | 0.113281  | 0.616830   |
| 75   | GOBP-REGULATION-OF-CELL-SIZE                      | GO-0008361 | 5  | 0.502893 | 1.300239  | 0.158470  | 0.613308   |
| 76   | GOBP-CARBOHYDRATE-METABOLIC-PROCESS               | GO-0005975 | 9  | 0.392405 | 1.292990  | 0.166667  | 0.625012   |
| 77   | GOBP-PROTEIN-KINASE-B-SIGNALING                   | GO-0043491 | 6  | 0.475610 | 1.292642  | 0.173780  | 0.617938   |
| 78   | GOBP-REGULATION-OF-BINDING                        | GO-0051098 | 11 | 0.356158 | 1.285623  | 0.134100  | 0.626709   |
| 79   | GOBP-POSITIVE-REGULATION-OF-CELL-DIFFERENTIATION  | GO-0045597 | 27 | 0.261939 | 1.278710  | 0.147982  | 0.634482   |
| 80   | GOBP-REGULATION-OF-NEURON-DIFFERENTIATION         | GO-0045664 | 5  | 0.493976 | 1.272196  | 0.171254  | 0.642338   |
| 81   | GOBP-RESPONSE-TO-MECHANICAL-STIMULUS              | GO-0009612 | 6  | 0.460386 | 1.267286  | 0.214057  | 0.646325   |
| 82   | GOBP-REGULATION-OF-PHOSPHOLIPASE-C-ACTIVITY       | GO-1900274 | 5  | 0.493976 | 1.266700  | 0.170520  | 0.639971   |
| 83   | GOBP-EPIDERMIS-DEVELOPMENT                        | GO-0008544 | 5  | 0.493976 | 1.263688  | 0.161290  | 0.640731   |

Continuation of Table S5

| NAME | ID                                                | SIZE | ES       | NES      | NOM.p.val | FDR.q.val | FWER.p.val |
|------|---------------------------------------------------|------|----------|----------|-----------|-----------|------------|
| 84   | GOBP-REGULATION-OF-FAT-CELL-DIFFERENTIATION       | 6    | 0.457851 | 1.257120 | 0.152047  | 0.649315  | 1.000      |
| 85   | GOBP-IMMUNE-RESPONSE-REGULATING-SIGNALING-PATHWAY | 8    | 0.396416 | 1.251042 | 0.195286  | 0.657148  | 1.000      |
| 86   | GOBP-POSITIVE-REGULATION-OF-BIOSYNTHETIC-PROCESS  | 27   | 0.257470 | 1.239395 | 0.187500  | 0.678835  | 1.000      |
| 87   | GOBP-REGULATION-OF-CELL-DIFFERENTIATION           | 36   | 0.241848 | 1.228878 | 0.195556  | 0.696463  | 1.000      |
| 88   | GOBP-REGULATION-OF-EPITHELIAL-CELL-MIGRATION      | 6    | 0.436126 | 1.224879 | 0.207207  | 0.699072  | 1.000      |
| 89   | GOBP-REGULATION-OF-CARBOHYDRATE-METABOLIC-PROCESS | 5    | 0.469880 | 1.220266 | 0.188679  | 0.703539  | 1.000      |
| 90   | GOBP-REGULATION-OF-ANION-TRANSMEMBRANE-TRANSPORT  | 5    | 0.469880 | 1.219432 | 0.229692  | 0.698241  | 1.000      |
| 91   | GOBP-POSITIVE-REGULATION-OF-LIPASE-ACTIVITY       | 5    | 0.396416 | 1.211555 | 0.204204  | 0.703439  | 1.000      |
| 92   | GOBP-FC-RECEPTOR-SIGNALING-PATHWAY                | 5    | 0.493976 | 1.211555 | 0.220056  | 0.703966  | 1.000      |
| 93   | GOBP-REGULATION-OF-IMMUNE-RESPONSE                | 12   | 0.337391 | 1.209553 | 0.194030  | 0.701548  | 1.000      |
| 94   | GOBP-REGULATION-OF-VASCULAR-ASSOCIATED-SMOOTH...  | 5    | 0.469880 | 1.204525 | 0.218329  | 0.708345  | 1.000      |
| 95   | GOBP-CARBOHYDRATE-BIOSYNTHETIC-PROCESS            | 5    | 0.469880 | 1.201346 | 0.223242  | 0.709644  | 1.000      |
| 96   | GOBP-MAINTENANCE-OF-LOCATION                      | 7    | 0.419753 | 1.199787 | 0.222561  | 0.706569  | 1.000      |
| 97   | GOBP-NEGATIVE-REGULATION-OF-INTRACELLULAR-SIGN... | 7    | 0.407407 | 1.197808 | 0.206061  | 0.704423  | 1.000      |
| 98   | GOBP-POSITIVE-REGULATION-OF-DEVELOPMENTAL-GROWTH  | 8    | 0.382299 | 1.194797 | 0.211480  | 0.704186  | 1.000      |
| 99   | GOBP-POSITIVE-REGULATION-OF-TRANSCRIPTION-BY-R... | 24   | 0.249141 | 1.191710 | 0.235808  | 0.704965  | 1.000      |
| 100  | GOBP-DEVELOPMENTAL-CELL-GROWTH                    | 5    | 0.469880 | 1.190766 | 0.229851  | 0.700547  | 1.000      |
| 101  | GOBP-RAS-PROTEIN-SIGNAL-TRANSDUCTION              | 5    | 0.469880 | 1.186071 | 0.256614  | 0.705562  | 1.000      |
| 102  | GOBP-REGULATION-OF-CARBOHYDRATE-BIOSYNTHETIC-P... | 5    | 0.469880 | 1.182099 | 0.241176  | 0.710046  | 1.000      |
| 103  | GOBP-NEGATIVE-REGULATION-OF-PHOSPHORYLATION       | 7    | 0.407407 | 1.178586 | 0.253049  | 0.712188  | 1.000      |
| 104  | GOBP-RESPONSE-TO-ORGANIC-CYCLOC-COMPOUND          | 20   | 0.265083 | 1.172416 | 0.232143  | 0.722585  | 1.000      |
| 105  | GOBP-POSITIVE-REGULATION-OF-PHOSPHATIDYLINOSIT... | 5    | 0.469880 | 1.170439 | 0.245810  | 0.721199  | 1.000      |
| 106  | GOBP-POSITIVE-REGULATION-OF-NUCLEOBASE-CONTAIN... | 28   | 0.233193 | 1.167646 | 0.235577  | 0.721509  | 1.000      |
| 107  | GOBP-CELLULAR-RESPONSE-TO-ABIOTIC-STIMULUS        | 7    | 0.411025 | 1.165801 | 0.246334  | 0.719263  | 1.000      |
| 108  | GOBP-POSITIVE-REGULATION-OF-IMMUNE-RESPONSE       | 9    | 0.357136 | 1.164353 | 0.239057  | 0.716059  | 1.000      |
| 109  | GOBP-NEGATIVE-REGULATION-OF-DEVELOPMENTAL-PROCESS | 13   | 0.306667 | 1.164231 | 0.242424  | 0.709890  | 1.000      |
| 110  | GOBP-REGULATION-OF-OSTEOCLAST-DIFFERENTIATION     | 5    | 0.458364 | 1.158893 | 0.271084  | 0.716530  | 1.000      |
| 111  | GOBP-IMPORT-INTO-CELL                             | 6    | 0.414634 | 1.156733 | 0.251429  | 0.715842  | 1.000      |
| 112  | GOBP-REGULATION-OF-PROTEOLYSIS                    | 12   | 0.330956 | 1.154072 | 0.251634  | 0.716379  | 1.000      |
| 113  | GOBP-REGULATION-OF-CELLULAR-COMPONENT-SIZE        | 7    | 0.388229 | 1.151861 | 0.295385  | 0.715934  | 1.000      |
| 114  | GOBP-NEGATIVE-REGULATION-OF-RESPONSE-TO-EXTERN... | 5    | 0.469880 | 1.150375 | 0.306630  | 0.713777  | 1.000      |
| 115  | GOBP-POSITIVE-REGULATION-OF-DEVELOPMENTAL-PROCESS | 32   | 0.222729 | 1.143297 | 0.226601  | 0.726102  | 1.000      |
| 116  | GOBP-NEGATIVE-REGULATION-OF-CELL-DIFFERENTIATION  | 13   | 0.306667 | 1.126890 | 0.292857  | 0.763295  | 1.000      |
| 117  | REACTOME-SENESCENCE-ASSOCIATED-SECRETORY-PHENO... | 6    | 0.405944 | 1.125761 | 0.283582  | 0.759810  | 1.000      |
| 118  | GOBP-RESPONSE-TO-ENDOGENOUS-STIMULUS              | 34   | 0.224328 | 1.125598 | 0.298507  | 0.753967  | 1.000      |
| 119  | GOBP-CELLULAR-COMPONENT-DISASSEMBLY               | 6    | 0.417599 | 1.125341 | 0.326347  | 0.748121  | 1.000      |
| 120  | GOBP-EMBRYO-DEVELOPMENT                           | 14   | 0.294001 | 1.122695 | 0.300000  | 0.749103  | 1.000      |
| 121  | REACTOME-CELLULAR-SENESCENCE                      | 6    | 0.405944 | 1.109476 | 0.320475  | 0.777557  | 1.000      |
| 122  | REACTOME-ESR-MEDIATED-SIGNALING                   | 8    | 0.352913 | 1.107232 | 0.276873  | 0.777310  | 1.000      |
| 123  | GOBP-CELL-CELL-JUNCTION-ASSEMBLY                  | 5    | 0.443995 | 1.106311 | 0.319149  | 0.773251  | 1.000      |
| 124  | GOBP-POSITIVE-REGULATION-OF_MULTICELLULAR_ORGA... | 32   | 0.214286 | 1.099257 | 0.349057  | 0.785209  | 1.000      |
| 125  | GOBP-PHAGOCYTOSIS                                 | 5    | 0.434803 | 1.095823 | 0.310541  | 0.787844  | 1.000      |
| 126  | GOBP-POSITIVE-REGULATION-OF_BINDING               | 6    | 0.402439 | 1.085716 | 0.355685  | 0.808114  | 1.000      |

Continuation of Table S5

| NAME | ID                                                | SIZE | ES       | NES      | NOM.p.val | FDR.q.val | FWER.p.val |
|------|---------------------------------------------------|------|----------|----------|-----------|-----------|------------|
| 127  | GOBP-REGULATION-OF-DEVELOPMENTAL-GROWTH           | 9    | 0.328853 | 1.084204 | 0.329114  | 0.806226  | 1.000      |
| 128  | GOBP-CELLULAR-RESPONSE-TO-ORGANIC-CYCLOC-COMPOUND | 13   | 0.282516 | 1.082350 | 0.366667  | 0.804528  | 1.000      |
| 129  | GOBP-REGULATION-OF-INFLAMMATORY-RESPONSE          | 7    | 0.366960 | 1.080222 | 0.334375  | 0.803819  | 1.000      |
| 130  | GOBP-NEGATIVE-REGULATION-OF-LIPID-METABOLIC-PR... | 5    | 0.428219 | 1.070865 | 0.352273  | 0.823432  | 1.000      |
| 131  | GOBP-REGULATION-OF-DEFENSE-RESPONSE               | 7    | 0.366960 | 1.070584 | 0.359621  | 0.817805  | 1.000      |
| 132  | GOBP-REGULATION-OF-CYSTEINE-TYPE-ENDOPEPTIDASE... | 9    | 0.327677 | 1.070419 | 0.373737  | 0.812002  | 1.000      |
| 133  | GOBP-ACTIVATION-OF-IMMUNE-RESPONSE                | 5    | 0.422002 | 1.069992 | 0.337176  | 0.806952  | 1.000      |
| 134  | GOBP-POSITIVE-REGULATION-OF-ORGANELLE-ORGANIZA... | 10   | 0.320296 | 1.068884 | 0.393333  | 0.803905  | 1.000      |
| 135  | REACTOME-SIGNALING-BY-NUCLEAR-RECEPTORS           | 8    | 0.352913 | 1.064179 | 0.345196  | 0.809842  | 1.000      |
| 136  | REACTOME-ADAPTIVE-IMMUNE-SYSTEM                   | 9    | 0.329114 | 1.063166 | 0.363636  | 0.806794  | 1.000      |
| 137  | GOBP-REGULATION-OF-DNA-BINDING-TRANSCRIPTION-F... | 16   | 0.264118 | 1.060510 | 0.376923  | 0.808698  | 1.000      |
| 138  | GOBP-REGULATION-OF-LIPID-LOCALIZATION             | 5    | 0.416976 | 1.056801 | 0.357143  | 0.812501  | 1.000      |
| 139  | REACTOME-EXTRA-NUCLEAR-ESTROGEN-SIGNALING         | 7    | 0.351146 | 1.042955 | 0.387302  | 0.843996  | 1.000      |
| 140  | GOBP-NEGATIVE-REGULATION-OF-CELL-DEATH            | 22   | 0.227819 | 1.036211 | 0.385965  | 0.855551  | 1.000      |
| 141  | GOBP-REGULATION-OF-CELLULAR-AMIDE-METABOLIC-PR... | 9    | 0.305619 | 1.010975 | 0.387960  | 0.917540  | 1.000      |
| 142  | GOBP-NEGATIVE-REGULATION-OF-KINASE-ACTIVITY       | 5    | 0.397590 | 1.010869 | 0.421687  | 0.911566  | 1.000      |
| 143  | GOBP-NEGATIVE-REGULATION-OF-BINDING               | 6    | 0.370341 | 1.010733 | 0.440341  | 0.905626  | 1.000      |
| 144  | GOBP-ANATOMICAL-STRUCTURE-FORMATION-INVOLVED-I... | 20   | 0.223707 | 1.009728 | 0.406250  | 0.901989  | 1.000      |
| 145  | GOBP-POSITIVE-REGULATION-OF-CELL-GROWTH           | 6    | 0.365675 | 1.007472 | 0.407625  | 0.902265  | 1.000      |
| 146  | GOBP-NEGATIVE-REGULATION-OF-TRANSFERASE-ACTIVITY  | 5    | 0.397590 | 1.007256 | 0.422222  | 0.896887  | 1.000      |
| 147  | GOBP-MUSCLE-CONTRACTION                           | 5    | 0.409639 | 1.007237 | 0.404070  | 0.890948  | 1.000      |
| 148  | GOBP-CELL-JUNCTION-ASSEMBLY                       | 8    | 0.327933 | 1.004022 | 0.411371  | 0.893360  | 1.000      |
| 149  | GOBP-POSITIVE-REGULATION-OF-SMALL-MOLECULE-MET... | 5    | 0.409639 | 1.000059 | 0.422840  | 0.898774  | 1.000      |
| 150  | GOBP-GLAND-DEVELOPMENT                            | 7    | 0.342857 | 0.996080 | 0.450311  | 0.902788  | 1.000      |
| 151  | GOBP-RESPONSE-TO-HORMONE                          | 20   | 0.221500 | 0.993601 | 0.440000  | 0.904089  | 1.000      |
| 152  | GOBP-REGULATION-OF-PROTEIN-CATABOLIC-PROCESS      | 7    | 0.334790 | 0.989675 | 0.456395  | 0.908979  | 1.000      |
| 153  | HALLMARK-UV-RESPONSE-UP                           | 5    | 0.386524 | 0.989075 | 0.447222  | 0.904569  | 1.000      |
| 154  | GOBP-POSITIVE-REGULATION-OF-MYELOID-LEUKOCYTE-... | 6    | 0.359850 | 0.981348 | 0.433048  | 0.919333  | 1.000      |
| 155  | HALLMARK-KRAS-SIGNALING-UP                        | 6    | 0.357785 | 0.980052 | 0.433243  | 0.916812  | 1.000      |
| 156  | GOBP-REPRODUCTIVE-SYSTEM-DEVELOPMENT              | 15   | 0.254098 | 0.978217 | 0.495968  | 0.910075  | 1.000      |
| 157  | GOBP-EPITHELIAL-DEVELOPMENT                       | 7    | 0.331437 | 0.978092 | 0.464968  | 0.904734  | 1.000      |
| 158  | GOBP-CELLULAR-RESPONSE-TO-OXYGEN-CONTAINING-CO... | 29   | 0.203915 | 0.977922 | 0.482143  | 0.899679  | 1.000      |
| 160  | GOBP-POSITIVE-REGULATION-OF-CELLULAR-COMPONENT... | 9    | 0.303320 | 0.972882 | 0.490506  | 0.907061  | 1.000      |
| 161  | GOBP-APOPTOTIC-MITOCHONDRIAL-CHANGES              | 6    | 0.353659 | 0.971863 | 0.463014  | 0.904296  | 1.000      |
| 162  | GOBP-CELLULAR-CARBOHYDRATE-METABOLIC-PROCESS      | 5    | 0.374494 | 0.965481 | 0.487730  | 0.916117  | 1.000      |
| 163  | GOBP-CELL-POPULATION-PROLIFERATION                | 32   | 0.194601 | 0.957612 | 0.511521  | 0.930712  | 1.000      |
| 164  | GOBP-REGULATION-OF-MYELOID-CELL-DIFFERENTIATION   | 9    | 0.301445 | 0.956828 | 0.469055  | 0.927085  | 1.000      |
| 165  | GOBP-REGULATION-OF-MYELOID-LEUKOCYTE-DIFFERENT... | 8    | 0.313217 | 0.948939 | 0.518634  | 0.942771  | 1.000      |
| 166  | GOBP-PROTEIN-CATABOLIC-PROCESS                    | 8    | 0.312081 | 0.946981 | 0.520376  | 0.942308  | 1.000      |
| 167  | GOBP-PROTEIN-LOCALIZATION-TO-PLASMA-MEMBRANE      | 7    | 0.319858 | 0.945721 | 0.505952  | 0.940621  | 1.000      |
| 168  | GOBP-POLYSACCHARIDE-METABOLIC-PROCESS             | 5    | 0.373494 | 0.943741 | 0.495441  | 0.940204  | 1.000      |
| 169  | GOBP-POSITIVE-REGULATION-OF-CELL-DEATH            | 19   | 0.218035 | 0.941406 | 0.508130  | 0.940476  | 1.000      |

Continuation of Table S5

| NAME | ID                                                | SIZE          | ES       | NES      | NOM.p.val | FDR.q.val | FWER.p.val |
|------|---------------------------------------------------|---------------|----------|----------|-----------|-----------|------------|
| 170  | GOBP-INOSITOL-LIPID-MEDIATED-SIGNALING            | 8             | 0.298970 | 0.939988 | 0.516820  | 0.938858  | 1.000      |
| 171  | GOBP-POSITIVE-REGULATION-OF-GROWTH                | 9             | 0.294208 | 0.937856 | 0.530945  | 0.938532  | 1.000      |
| 172  | GOBP-POSITIVE-REGULATION-OF-DEFENSE-RESPONSE      | 5             | 0.372859 | 0.933018 | 0.533333  | 0.945280  | 1.000      |
| 173  | GOBP-LEUKOCYTE-MIGRATION                          | 6             | 0.338581 | 0.932096 | 0.503030  | 0.941748  | 1.000      |
| 174  | GOBP-POSITIVE-REGULATION-OF-TRANSMEMBRANE-TRAN... | 7             | 0.308642 | 0.927854 | 0.516820  | 0.946815  | 1.000      |
| 175  | GOBP-NEGATIVE-REGULATION-OF-ION-TRANSPORT         | 11            | 0.259740 | 0.924335 | 0.527778  | 0.950346  | 1.000      |
| 176  | GOBP-FAT-CELL-DIFFERENTIATION                     | 9             | 0.277650 | 0.921036 | 0.576433  | 0.953188  | 1.000      |
| 177  | GOBP-REGULATION-OF-PROTEIN-LOCALIZATION-TO-CEL... | 6             | 0.336702 | 0.920154 | 0.533537  | 0.949859  | 1.000      |
| 178  | GOBP-NEGATIVE-REGULATION-OF-MULTICELLULAR-ORGA... | 15            | 0.233143 | 0.919272 | 0.574713  | 0.946497  | 1.000      |
| 179  | GOBP-GENERATION-OF-PRECURSOR-METABOLITES-AND-E... | 5             | 0.373494 | 0.917577 | 0.578082  | 0.945694  | 1.000      |
| 180  | GOBP-REGULATION-OF-SMALL-MOLECULE-METABOLIC-PR... | 9             | 0.278481 | 0.917488 | 0.518033  | 0.940662  | 1.000      |
| 181  | GOBP-POSITIVE-REGULATION-OF-CELL-DEVELOPMENT      | 12            | 0.243084 | 0.910497 | 0.565056  | 0.952963  | 1.000      |
| 182  | GOBP-DEVELOPMENTAL-GROWTH                         | 10            | 0.269419 | 0.909041 | 0.537367  | 0.951648  | 1.000      |
| 183  | GOBP-RESPONSE-TO-OXYGEN-CONTAINING-COMPOUND       | 39            | 0.176114 | 0.907330 | 0.634518  | 0.950838  | 1.000      |
| 184  | GOBP-RESPONSE-TO-LIGHT-STIMULUS                   | 11            | 0.255317 | 0.907178 | 0.580071  | 0.946049  | 1.000      |
| 185  | GOBP-INTRACELLULAR-PROTEIN-TRANSPORT              | 8             | 0.287500 | 0.901398 | 0.580060  | 0.955180  | 1.000      |
| 186  | HALLMARK-EPITHELIAL-MESENCHYMAL-TRANSITION        | M5930         | 5        | 0.357522 | 0.901075  | 0.582656  | 0.951018   |
| 187  | REACTOME-NGF-STIMULATED-TRANSCRIPTION             | R-RNO-9031628 | 9        | 0.275645 | 0.896944  | 0.616129  | 0.949714   |
| 188  | GOBP-TISSUE-HOMEOSTASIS                           | 5             | 0.356290 | 0.897363 | 0.557185  | 0.950637  | 1.000      |
| 189  | GOBP-POSITIVE-REGULATION-OF-ION-TRANSPORT         | 17            | 0.210952 | 0.894015 | 0.607930  | 0.954024  | 1.000      |
| 190  | GOBP-REGULATION-OF-CELL-CYCLE                     | 13            | 0.241245 | 0.891463 | 0.584559  | 0.954875  | 1.000      |
| 191  | GOBP-WOUND-HEALING                                | 13            | 0.239113 | 0.891129 | 0.588679  | 0.950775  | 1.000      |
| 192  | GOBP-ANIMAL-ORGAN-MORPHOGENESIS                   | 12            | 0.244699 | 0.890917 | 0.576779  | 0.946445  | 1.000      |
| 193  | GOBP-POSITIVE-REGULATION-OF-NERVOUS-SYSTEM.DEV... | 12            | 0.243084 | 0.890763 | 0.603448  | 0.941994  | 1.000      |
| 194  | GOBP-AGING                                        | 13            | 0.239576 | 0.888160 | 0.575290  | 0.943376  | 1.000      |
| 195  | GOBP-POSITIVE-REGULATION-OF-NEUROGENESIS          | 12            | 0.243084 | 0.887733 | 0.622776  | 0.939708  | 1.000      |
| 196  | REACTOME-ESTROGEN-DEPENDENT-NUCLEAR-EVENTS.DOW... | 5             | 0.352186 | 0.887601 | 0.573913  | 0.935153  | 1.000      |
| 197  | GOBP-POSITIVE-REGULATION-OF-ANION-TRANSPORT       | 9             | 0.272770 | 0.886947 | 0.621212  | 0.931925  | 1.000      |
| 198  | GOBP-POSITIVE-REGULATION-OF-GENE-EXPRESSION       | 16            | 0.216239 | 0.885409 | 0.593407  | 0.931099  | 1.000      |
| 199  | GOBP-NEGATIVE-REGULATION-OF-IMMUNE-SYSTEM-PROCESS | 5             | 0.350482 | 0.877843 | 0.589970  | 0.943670  | 1.000      |
| 200  | GOBP-REGULATION-OF-NERVOUS-SYSTEM-DEVELOPMENT     | 15            | 0.219178 | 0.867559 | 0.611111  | 0.963499  | 1.000      |
| 201  | GOBP-REGULATION-OF-CELL-DEVELOPMENT               | 15            | 0.217715 | 0.866720 | 0.666667  | 0.960601  | 1.000      |
| 202  | GOBP-NEGATIVE-REGULATION-OF-CELL-DEVELOPMENT      | 15            | 0.219178 | 0.863752 | 0.654762  | 0.962928  | 1.000      |
| 203  | GOBP-POSITIVE-REGULATION-OF-CELL-DEVELOPMENT      | 6             | 0.317073 | 0.862027 | 0.608955  | 0.962257  | 1.000      |
| 204  | GOBP-POSITIVE-REGULATION-OF-CELLULAR-PROTEIN.L... | 7             | 0.283951 | 0.853302 | 0.640244  | 0.976893  | 1.000      |
| 205  | GOBP-DEFENSE-RESPONSE                             | 19            | 0.194489 | 0.851084 | 0.678392  | 0.976831  | 1.000      |
| 206  | GOBP-PATTERN-SPECIFICATION-PROCESS                | 6             | 0.304878 | 0.849903 | 0.677741  | 0.974819  | 1.000      |
| 207  | GOBP-MULTI-ORGANISM-PROCESS                       | 16            | 0.208726 | 0.849902 | 0.690476  | 0.970160  | 1.000      |
| 208  | GOBP-PERIPHERAL-NERVOUS-SYSTEM-DEVELOPMENT        | 9             | 0.260110 | 0.849528 | 0.660377  | 0.966426  | 1.000      |
| 209  | REACTOME-INFECTIOUS-DISEASE                       | 12            | 0.227134 | 0.842919 | 0.671378  | 0.976145  | 1.000      |
| 210  | GOBP-POSITIVE-REGULATION-OF-NEURON-DEATH          | 5             | 0.335224 | 0.838113 | 0.634921  | 0.982171  | 1.000      |
| 211  | GOBP-REGIONALIZATION                              | 6             | 0.304878 | 0.837841 | 0.643750  | 0.978282  | 1.000      |
| 212  | GOBP-PROTEIN-MODIFICATION-BY-SMALL-PROTEIN.CON... | 7             | 0.275118 | 0.835961 | 0.658892  | 0.977817  | 1.000      |

Continuation of Table S5

| NAME                                                    | ID            | SIZE | ES       | NES      | NOM.p.val | FDR.q.val | FWER.p.val |
|---------------------------------------------------------|---------------|------|----------|----------|-----------|-----------|------------|
| 213 GOBP-PHOSPHATIDYLINOSITOL_3_KINASE-SIGNALING        | GO-0014065    | 7    | 0.283951 | 0.835399 | 0.625369  | 0.974362  | 1.000      |
| 214 GOBP-NEGATIVE-REGULATION-OF-CATABOLIC-PROCESS       | GO-0009895    | 8    | 0.273310 | 0.834456 | 0.714715  | 0.972301  | 1.000      |
| 215 GOBP-REGULATION-OF-ANATOMICAL-STRUCTURE-SIZE        | GO-0090066    | 10   | 0.244660 | 0.833528 | 0.676768  | 0.969872  | 1.000      |
| 216 GOBP-CHROMATIN-ORGANIZATION                         | GO-0006325    | 5    | 0.331573 | 0.831907 | 0.654054  | 0.968753  | 1.000      |
| 217 REACTOME_FC-EPSILON-RECEPTOR_FCERL-SIGNALING        | R-RNO-2454202 | 7    | 0.283951 | 0.827759 | 0.682779  | 0.968704  | 1.000      |
| 218 GOBP_FC-EPSILON-RECEPTOR-SIGNALING-PATHWAY          | GO-0038095    | 7    | 0.283951 | 0.823928 | 0.706061  | 0.976878  | 1.000      |
| 219 GOBP-EPHRIN_RECEPTOR-SIGNALING-PATHWAY              | GO-0048013    | 5    | 0.320222 | 0.823600 | 0.659459  | 0.973131  | 1.000      |
| 220 GOBP-REGULATION-OF-CELLULAR-COMPONENT_BIOGENESIS    | GO-0044087    | 10   | 0.242218 | 0.820828 | 0.687296  | 0.974718  | 1.000      |
| 221 GOBP-REGULATION-OF-NEUROGENESIS                     | GO-0050767    | 14   | 0.216216 | 0.820302 | 0.685121  | 0.971337  | 1.000      |
| 222 GOBP-NEGATIVE-REGULATION-OF-BIOSYNTHETIC-PROCESS    | GO-0009890    | 13   | 0.222495 | 0.819644 | 0.697318  | 0.968264  | 1.000      |
| 223 GOBP-NEGATIVE-REGULATION-OF-PROTEIN-MODIFICATION... | GO-0031400    | 10   | 0.235815 | 0.817842 | 0.693333  | 0.967258  | 1.000      |
| 224 GOBP-REGULATION-OF-AXONOGENESIS                     | GO-0050770    | 7    | 0.280137 | 0.817223 | 0.684848  | 0.964172  | 1.000      |
| 225 GOBP-REGULATION-OF-HYDROLASE-ACTIVITY               | GO-0051336    | 22   | 0.181878 | 0.815166 | 0.737052  | 0.964345  | 1.000      |
| 226 GOBP-RESPONSE-TO-WOUNDING                           | GO-0009611    | 15   | 0.196574 | 0.815110 | 0.725564  | 0.960153  | 1.000      |
| 227 GOBP-NEGATIVE-REGULATION-OF-RESPONSE-TO-STIMULUS    | GO-0048585    | 16   | 0.199906 | 0.814649 | 0.710623  | 0.950822  | 1.000      |
| 228 GOBP-POSITIVE-REGULATION-OF-PEPTIDASE-ACTIVITY      | GO-0010952    | 7    | 0.267741 | 0.810088 | 0.695522  | 0.961275  | 1.000      |
| 229 GOBP-REGULATION-OF-MULTICELLULAR-ORGANISMAL-DE...   | GO-2000026    | 31   | 0.161659 | 0.807526 | 0.738095  | 0.962193  | 1.000      |
| 230 HALLMARK_P13K-AKT-MTOR-SIGNALING                    | M5923         | 6    | 0.289532 | 0.804435 | 0.696486  | 0.964217  | 1.000      |
| 231 GOBP-CELLULAR-LIPID-METABOLIC-PROCESS               | GO-0044255    | 7    | 0.271605 | 0.797163 | 0.752443  | 0.973852  | 1.000      |
| 232 GOBP-NEGATIVE-REGULATION-OF-NEUROUS-SYSTEM-DEV...   | GO-0051961    | 5    | 0.313253 | 0.796881 | 0.692547  | 0.970271  | 1.000      |
| 233 GOBP-RESPONSE-TO-MOLECULE-OF-BACTERIAL-ORIGIN       | GO-0002237    | 13   | 0.207770 | 0.796052 | 0.749129  | 0.967679  | 1.000      |
| 234 GOBP-POSITIVE-REGULATION-OF-CELLULAR-COMPONENT...   | GO-0051130    | 24   | 0.168940 | 0.795447 | 0.785088  | 0.964975  | 1.000      |
| 235 GOBP-RESPONSE-TO-BACTERIUM                          | GO-0009617    | 13   | 0.207770 | 0.794840 | 0.796491  | 0.961974  | 1.000      |
| 236 REACTOME_HEMOSTASIS                                 | R-RNO-109582  | 14   | 0.202594 | 0.793949 | 0.772908  | 0.959309  | 1.000      |
| 237 GOBP-CARBOHYDRATE-DERIVATIVE-METABOLIC-PROCESS      | GO-1901135    | 8    | 0.261345 | 0.793505 | 0.736508  | 0.956158  | 1.000      |
| 238 GOBP-REGULATION-OF-ENDOTHELIAL-CELL-MIGRATION       | GO-0010594    | 5    | 0.314056 | 0.791663 | 0.709677  | 0.955811  | 1.000      |
| 239 GOBP-ENZYME-LINKED-RECEPTOR-PROTEIN-SIGNALING-...   | GO-0007167    | 24   | 0.171875 | 0.788210 | 0.767857  | 0.958480  | 1.000      |
| 240 GOBP-ORGANIC-ACID-METABOLIC-PROCESS                 | GO-0006082    | 7    | 0.271605 | 0.785408 | 0.723032  | 0.959606  | 1.000      |
| 241 GOBP-PEPTIDE-BIOSYNTHETIC-PROCESS                   | GO-0043043    | 6    | 0.289471 | 0.783609 | 0.716714  | 0.958802  | 1.000      |
| 242 GOBP-RESPONSE-TO-RADIATION                          | GO-0009314    | 13   | 0.205345 | 0.783098 | 0.768683  | 0.955835  | 1.000      |
| 243 GOBP-MUSCLE-CELL-DEVELOPMENT                        | GO-0055001    | 5    | 0.313253 | 0.777775 | 0.729107  | 0.961726  | 1.000      |
| 244 GOBP-POSITIVE-REGULATION-OF-CYSTEINE-TYPE-ENDO...   | GO-2001056    | 7    | 0.267741 | 0.775864 | 0.783172  | 0.961099  | 1.000      |
| 245 GOBP-AMIDE-BIOSYNTHETIC-PROCESS                     | GO-0043604    | 6    | 0.289471 | 0.775495 | 0.717579  | 0.957720  | 1.000      |
| 246 GOBP-NEGATIVE-REGULATION-OF-NUCLEOBASE-CONTAIN...   | GO-0045934    | 13   | 0.204303 | 0.775257 | 0.761092  | 0.954186  | 1.000      |
| 247 GOBP-NEGATIVE-REGULATION-OF-ANION-TRANSPORT         | GO-1903792    | 8    | 0.250000 | 0.774839 | 0.750000  | 0.951223  | 1.000      |
| 248 GOBP-REPRODUCTION                                   | GO-0000003    | 18   | 0.184778 | 0.770533 | 0.825203  | 0.954853  | 1.000      |
| 249 GOBP-EMBRYONIC-MORPHOGENESIS                        | GO-0048598    | 6    | 0.280488 | 0.764235 | 0.742690  | 0.961830  | 1.000      |
| 250 GOBP-LIPID-LOCALIZATION                             | GO-0010876    | 10   | 0.230769 | 0.760356 | 0.800725  | 0.964581  | 1.000      |
| 251 GOBP-NEUROINFLAMMATORY_RESPONSE                     | GO-0150076    | 5    | 0.301644 | 0.759708 | 0.760000  | 0.961775  | 1.000      |
| 252 GOBP-LIPID-BIOSYNTHETIC-PROCESS                     | GO-0008610    | 6    | 0.278771 | 0.759200 | 0.787710  | 0.959081  | 1.000      |
| 253 GOBP-RESPONSE-TO-TUMOR-NECROSIS-FACTOR              | GO-0034612    | 7    | 0.259052 | 0.756691 | 0.800000  | 0.959142  | 1.000      |
| 254 GOBP-REGULATION-OF-LIPID-BIOSYNTHETIC-PROCESS       | GO-0046890    | 6    | 0.272642 | 0.751940 | 0.760684  | 0.963120  | 1.000      |
| 255 GOBP-IN-UTERO-EMBRYONIC-DEVELOPMENT                 | GO-0001701    | 8    | 0.246363 | 0.748104 | 0.800000  | 0.965331  | 1.000      |

Continuation of Table S5

| NAME | ID                                                | SIZE | ES       | NES      | NOM.p.val | FDR.q.val | FWER.p.val |
|------|---------------------------------------------------|------|----------|----------|-----------|-----------|------------|
| 256  | GOBP-CELL-GROWTH                                  | 10   | 0.223149 | 0.747839 | 0.765151  | 0.961920  | 1.000      |
| 257  | GOBP-INTRACELLULAR-RECEPTOR-SIGNALING-PATHWAY     | 5    | 0.294181 | 0.745583 | 0.784367  | 0.961607  | 1.000      |
| 258  | GOBP-POSITIVE-REGULATION-OF-PROTEOLYSIS           | 8    | 0.243425 | 0.744545 | 0.823129  | 0.959882  | 1.000      |
| 259  | GOBP-REGULATION-OF-PHOSPHATIDYLINOSITOL-3-KINA... | 6    | 0.280488 | 0.743752 | 0.793313  | 0.957540  | 1.000      |
| 260  | GOBP-MONOCARBOXYLIC-ACID-METABOLIC-PROCESS        | 6    | 0.268293 | 0.739179 | 0.800000  | 0.961443  | 1.000      |
| 261  | GOBP-NEURON-MIGRATION                             | 5    | 0.301205 | 0.738954 | 0.778393  | 0.958103  | 1.000      |
| 262  | GOBP-POSITIVE-REGULATION-OF-EPITHELIAL-CELL-MI... | 5    | 0.290324 | 0.736111 | 0.782967  | 0.958939  | 1.000      |
| 263  | GOBP-REGULATION-OF-GROWTH                         | 13   | 0.186866 | 0.731119 | 0.835125  | 0.963151  | 1.000      |
| 264  | GOBP-RESPONSE-TO-INSULIN                          | 5    | 0.289157 | 0.729405 | 0.788462  | 0.961919  | 1.000      |
| 265  | GOBP-POSITIVE-REGULATION-OF-CELL-POPULATION.PR... | 21   | 0.163806 | 0.723396 | 0.81356   | 0.967522  | 1.000      |
| 266  | GOBP-CELLULAR-RESPONSE-TO-BIOTIC-STIMULUS         | 8    | 0.225937 | 0.717785 | 0.853896  | 0.971754  | 1.000      |
| 267  | GOBP-NERVE-DEVELOPMENT                            | 9    | 0.215190 | 0.711452 | 0.885714  | 0.976626  | 1.000      |
| 268  | GOBP-ORGANONITROGEN-COMPOUND-CATABOLIC-PROCESS    | 10   | 0.210715 | 0.710265 | 0.856643  | 0.974580  | 1.000      |
| 269  | GOBP-CELLULAR-RESPONSE-TO-STARVATION              | 5    | 0.277108 | 0.704063 | 0.818444  | 0.980015  | 1.000      |
| 270  | GOBP-CELLULAR-RESPONSE-TO-MOLECULE-OF-BACTERIA... | 8    | 0.225937 | 0.700387 | 0.851064  | 0.981361  | 1.000      |
| 271  | GOBP-RESPONSE-TO-STARVATION                       | 5    | 0.277108 | 0.697356 | 0.853731  | 0.981609  | 1.000      |
| 272  | GOBP-PEPTIDE-METABOLIC-PROCESS                    | 11   | 0.198234 | 0.697073 | 0.851711  | 0.978430  | 1.000      |
| 273  | GOBP-RESPONSE-TO-NERVE-GROWTH-FACTOR              | 7    | 0.236549 | 0.696125 | 0.849398  | 0.976045  | 1.000      |
| 274  | GOBP-MACROMOLECULE-CATABOLIC-PROCESS              | 11   | 0.195173 | 0.694871 | 0.875912  | 0.974343  | 1.000      |
| 275  | GOBP-REGULATION-OF-ORGAN-GROWTH                   | 5    | 0.277108 | 0.694240 | 0.841945  | 0.971570  | 1.000      |
| 276  | GOBP-ORGAN-GROWTH                                 | 5    | 0.277108 | 0.692755 | 0.848315  | 0.970178  | 1.000      |
| 277  | GOBP-POSITIVE-REGULATION-OF-LEUKOCYTE-CELL-CEL... | 5    | 0.269115 | 0.692685 | 0.856716  | 0.966785  | 1.000      |
| 278  | GOBP-REGULATION-OF-CYTOSKELETON-ORGANIZATION      | 5    | 0.277109 | 0.685593 | 0.857143  | 0.968662  | 1.000      |
| 279  | GOBP-ORGANIC-HYDROXY-COMPOUND-METABOLIC-PROCESS   | 8    | 0.218368 | 0.688284 | 0.854985  | 0.965549  | 1.000      |
| 280  | GOBP-LEUKOCYTE-CELL-CELL-ADHESION                 | 6    | 0.247227 | 0.687334 | 0.870769  | 0.963218  | 1.000      |
| 281  | GOBP-PEPTIDYL-SERINE-MODIFICATION                 | 12   | 0.184211 | 0.683352 | 0.892857  | 0.964531  | 1.000      |
| 282  | GOBP-ANION-TRANSMEMBRANE-TRANSPORT                | 7    | 0.234568 | 0.682120 | 0.884849  | 0.962667  | 1.000      |
| 283  | GOBP-MATERNAL-PROCESS-INVOLVED-IN-FEMALE-PREGN... | 5    | 0.265060 | 0.681374 | 0.859838  | 0.960348  | 1.000      |
| 284  | GOBP-NEGATIVE-REGULATION-OF-NEURON-APOPTOTIC-P... | 8    | 0.212500 | 0.680021 | 0.879880  | 0.958400  | 1.000      |
| 285  | REACTOME-SIGNALING-BY-NTRKS                       | 18   | 0.162836 | 0.675012 | 0.917012  | 0.960637  | 1.000      |
| 286  | GOBP-RESPONSE-TO-CALCIUMION                       | 6    | 0.242185 | 0.671145 | 0.900621  | 0.961645  | 1.000      |
| 287  | GOBP-RESPONSE-TO-OXYGEN-LEVELS                    | 8    | 0.215319 | 0.669724 | 0.881789  | 0.959815  | 1.000      |
| 288  | GOBP-REGULATION-OF-PROTEIN-SERINE-THREONINE-KI... | 12   | 0.180421 | 0.669579 | 0.885714  | 0.956583  | 1.000      |
| 289  | REACTOME-L1CAM-INTERACTIONS                       | 5    | 0.265481 | 0.668440 | 0.865285  | 0.954435  | 1.000      |
| 290  | GOBP-POSITIVE-REGULATION-OF-CELL-CELL-ADHESION    | 5    | 0.269115 | 0.666356 | 0.886179  | 0.953760  | 1.000      |
| 291  | GOBP-TRANSMEMBRANE-RECEPTOR-PROTEIN-TYROSINE-K... | 19   | 0.159420 | 0.666124 | 0.907258  | 0.950716  | 1.000      |
| 292  | GOBP-ORGANIC-HYDROXY-COMPOUND-TRANSPORT           | 6    | 0.240146 | 0.663121 | 0.883495  | 0.950676  | 1.000      |
| 293  | GOBP-MITOCHONDRION-ORGANIZATION                   | 7    | 0.222222 | 0.661316 | 0.883436  | 0.949491  | 1.000      |
| 294  | GOBP-BIOLOGICAL-PROCESS-INVOLVED-IN-SYMBIOTIC.... | 10   | 0.194383 | 0.647319 | 0.919192  | 0.960717  | 1.000      |
| 295  | GOBP-REGULATION-OF-ORGANELLE-ORGANIZATION         | 14   | 0.166005 | 0.645548 | 0.933566  | 0.959363  | 1.000      |
| 296  | REACTOME-TRANSCRIPTIONAL-REGULATION-BY-TP53       | 6    | 0.237742 | 0.642408 | 0.921136  | 0.958962  | 1.000      |
| 297  | GOBP-POSITIVE-REGULATION-OF-HYDROLASE-ACTIVITY    | 16   | 0.152777 | 0.633777 | 0.965780  | 0.963561  | 1.000      |
| 298  | GOBP-SMALL-GTPASE-MEDIATED-SIGNAL-TRANSDUCTION    | 8    | 0.200000 | 0.625020 | 0.930314  | 0.967567  | 1.000      |



Continuation of Table S5

| NAME | ID                                                | SIZE | ES        | NES       | NOM.p.val | FDR.q.val | FWER.p.val |
|------|---------------------------------------------------|------|-----------|-----------|-----------|-----------|------------|
| 299  | GOBP-EMBRYO-DEVELOPMENT-ENDING.IN.BIRTH.OR.EGG... | 9    | 0.191396  | 0.618590  | 0.951890  | 0.969345  | 1.000      |
| 300  | GOBP-FATTY-ACID-TRANSPORT                         | 6    | 0.219512  | 0.610001  | 0.949843  | 0.972896  | 1.000      |
| 301  | GOBP-HEART-DEVELOPMENT                            | 6    | 0.210200  | 0.604137  | 0.969040  | 0.974289  | 1.000      |
| 302  | GOBP-GROWTH                                       | 14   | 0.153747  | 0.598282  | 0.989437  | 0.974933  | 1.000      |
| 303  | GOBP-REGULATION-OF-MITOTIC-CELL-CYCLE             | 5    | 0.234588  | 0.582728  | 0.947059  | 0.980996  | 1.000      |
| 304  | GOBP-CELLULAR-AMIDE-METABOLIC-PROCESS             | 12   | 0.155332  | 0.578263  | 0.982014  | 0.980063  | 1.000      |
| 305  | GOBP-PROTEIN-AUTOPHOSPHORYLATION                  | 5    | 0.221961  | 0.570884  | 0.955182  | 0.980769  | 1.000      |
| 306  | GOBP-CARDIAC-MUSCLE-TISSUE-DEVELOPMENT            | 6    | 0.210200  | 0.569538  | 0.937500  | 0.978238  | 1.000      |
| 307  | GOBP-CYTOKINE-PRODUCTION                          | 10   | 0.153846  | 0.534602  | 0.990000  | 0.988565  | 1.000      |
| 308  | GOBP-RESPONSE-TO-ACID-CHEMICAL                    | 6    | 0.189960  | 0.515294  | 0.989041  | 0.990339  | 1.000      |
| 309  | GOBP-NEGATIVE-REGULATION-OF-TRANSPORT             | 13   | -0.135637 | -0.427250 | 0.994467  | 0.996896  | 1.000      |
| 310  | GOBP-RESPONSE-TO-KETONE                           | 7    | -0.178454 | -0.454553 | 0.994021  | 0.996023  | 1.000      |
| 311  | GOBP-RESPONSE-TO-LIPID                            | 19   | -0.134449 | -0.464214 | 0.986505  | 0.996853  | 1.000      |
| 312  | REACTOME-TOLL-LIKE-RECEPTOR-TLR1-TLR2-CASCADE     | 8    | -0.180490 | -0.480922 | 0.989474  | 0.995826  | 1.000      |
| 313  | REACTOME-MYD88-INDEPENDENT-TLR4-CASCADE           | 8    | -0.180490 | -0.483036 | 0.988201  | 0.997781  | 1.000      |
| 314  | REACTOME-TOLL-LIKE-RECEPTOR-CASCADES              | 8    | -0.180490 | -0.483477 | 0.989899  | 1.000000  | 1.000      |
| 315  | REACTOME-TOLL-LIKE-RECEPTOR-9-TLR9-CASCADE        | 8    | -0.180490 | -0.483734 | 0.991241  | 1.000000  | 1.000      |
| 316  | GOBP-POSITIVE-REGULATION-OF-CELL-PROJECTION-OR... | 10   | -0.177471 | -0.502915 | 0.977974  | 0.999407  | 1.000      |
| 317  | GOBP-POSTTRANSCRIPTIONAL-REGULATION-OF-GENE-EX... | 8    | -0.187858 | -0.507799 | 0.984127  | 1.000000  | 1.000      |
| 318  | GOBP-REGULATION-OF-MUSCLE-CELL-DIFFERENTIATION    | 6    | -0.211709 | -0.512063 | 0.986466  | 1.000000  | 1.000      |
| 319  | GOBP-POSITIVE-REGULATION-OF-PEPTIDYL-TYROSINE...  | 8    | -0.194058 | -0.513289 | 0.965714  | 1.000000  | 1.000      |
| 320  | GOBP-REGULATION-OF-PROTEIN-STABILITY              | 5    | -0.229634 | -0.516532 | 0.987578  | 1.000000  | 1.000      |
| 321  | GOBP-REGULATION-OF-LYMPHOCYTE-ACTIVATION          | 5    | -0.240510 | -0.539624 | 0.966507  | 0.997355  | 1.000      |
| 322  | GOBP-POSITIVE-REGULATION-OF-ESTABLISHMENT-OF-P... | 5    | -0.242344 | -0.548802 | 0.970543  | 0.995105  | 1.000      |
| 323  | GOBP-REGULATION-OF-CELL-CELL-ADHESION             | 9    | -0.202706 | -0.551777 | 0.958271  | 0.997793  | 1.000      |
| 324  | GOBP-ACTIVATION-OF-PROTEIN-KINASE-ACTIVITY        | 11   | -0.188793 | -0.556301 | 0.961538  | 0.998610  | 1.000      |
| 325  | GOBP-NEGATIVE-REGULATION-OF-GENE-EXPRESSION       | 11   | -0.190375 | -0.561453 | 0.964865  | 0.998176  | 1.000      |
| 326  | GOBP-MUSCLE-TISSUE-DEVELOPMENT                    | 18   | -0.166069 | -0.561937 | 0.949797  | 1.000000  | 1.000      |
| 327  | GOBP-RESPONSE-TO-PEPTIDE                          | 10   | -0.201568 | -0.565300 | 0.949852  | 1.000000  | 1.000      |
| 328  | GOBP-LIPID-METABOLIC-PROCESS                      | 12   | -0.191124 | -0.579049 | 0.949454  | 0.997400  | 1.000      |
| 329  | GOBP-RESPONSE-TO-METAL-ION                        | 15   | -0.172842 | -0.568456 | 0.953947  | 1.000000  | 1.000      |
| 330  | GOBP-REGULATION-OF-CELLULAR-PROTEIN-LOCALIZATION  | 8    | -0.218460 | -0.588327 | 0.943262  | 0.993426  | 1.000      |
| 331  | GOBP-COAGULATION                                  | 8    | -0.218460 | -0.588327 | 0.943262  | 0.993426  | 1.000      |
| 332  | GOBP-DEVELOPMENTAL-PROCESS-INVOLVED-IN-REPRODU... | 11   | -0.201896 | -0.589013 | 0.938289  | 0.995472  | 1.000      |
| 333  | GOBP-CELLULAR-RESPONSE-TO-LIPID                   | 15   | -0.186212 | -0.591105 | 0.938089  | 0.996469  | 1.000      |
| 334  | GOBP-NEURON-APOPTOTIC-PROCESS                     | 12   | -0.195200 | -0.593506 | 0.934752  | 0.997232  | 1.000      |
| 335  | GOBP-NEGATIVE-REGULATION-OF-SIGNALING             | 21   | -0.168633 | -0.593890 | 0.938642  | 0.999484  | 1.000      |
| 336  | GOBP-REGULATION-OF-GLIOGENESIS                    | 5    | -0.263896 | -0.594080 | 0.938931  | 1.000000  | 1.000      |
| 337  | GOBP-RESPONSE-TO-GROWTH-FACTOR                    | 18   | -0.175529 | -0.597909 | 0.927152  | 1.000000  | 1.000      |
| 338  | GOBP-CELLULAR-RESPONSE-TO-DNA-DAMAGE-STIMULUS     | 5    | -0.262447 | -0.598897 | 0.945652  | 1.000000  | 1.000      |
| 339  | GOBP-NEGATIVE-REGULATION-OF-CELLULAR-COMPONENT... | 11   | -0.202702 | -0.599578 | 0.922628  | 1.000000  | 1.000      |
| 340  | GOBP-DNA-METABOLIC-PROCESS                        | 6    | -0.249659 | -0.600673 | 0.934884  | 1.000000  | 1.000      |
| 341  | GOBP-POSITIVE-REGULATION-OF-GLIOGENESIS           | 5    | -0.263896 | -0.602404 | 0.943164  | 1.000000  | 1.000      |

Continuation of Table S5

| NAME | ID                                                | SIZE | ES        | NES       | NOM.p.val | FDR.q.val | FWER.p.val |
|------|---------------------------------------------------|------|-----------|-----------|-----------|-----------|------------|
| 342  | GOBP-ERK1-AND-ERK2-CASCADE                        | 5    | -0.271059 | -0.603101 | 0.924471  | 1.000000  | 1.000      |
| 343  | GOBP-POSITIVE-REGULATION-OF-DNA-BINDING-TRANSC... | 10   | -0.209573 | -0.606026 | 0.928258  | 1.000000  | 1.000      |
| 344  | GOBP-REGULATION-OF-PROTEIN-PHOSPHORYLATION        | 25   | -0.165814 | -0.607606 | 0.916991  | 1.000000  | 1.000      |
| 345  | GOBP-RESPONSE-TO-DRUG                             | 11   | -0.208202 | -0.614552 | 0.915954  | 1.000000  | 1.000      |
| 346  | GOBP-REGULATION-OF-PHOSPHORUS-METABOLIC-PROCESS   | 26   | -0.166113 | -0.615450 | 0.921290  | 1.000000  | 1.000      |
| 347  | GOBP-LEARNING                                     | 13   | -0.198676 | -0.616478 | 0.915160  | 1.000000  | 1.000      |
| 348  | GOBP-ORGANIC-ACID-TRANSPORT                       | 7    | -0.241238 | -0.619475 | 0.911544  | 1.000000  | 1.000      |
| 349  | GOBP-ORGANONITROGEN-COMPOUND-BIOSYNTHETIC-PROCESS | 13   | -0.200773 | -0.619753 | 0.927966  | 1.000000  | 1.000      |
| 350  | GOBP-TRANSMEMBRANE-RECEPTOR-PROTEIN-SERINE-THR... | 6    | -0.255637 | -0.623223 | 0.910906  | 1.000000  | 1.000      |
| 351  | GOBP-SMALL-MOLECULE-BIOSYNTHETIC-PROCESS          | 5    | -0.273716 | -0.625954 | 0.930269  | 1.000000  | 1.000      |
| 352  | GOBP-REGULATION-OF-TRANSFERASE-ACTIVITY           | 21   | -0.182486 | -0.629106 | 0.919481  | 1.000000  | 1.000      |
| 353  | REACTOME-NUCLEAR-EVENTS-KINASE-AND-TRANSCRIPTI... | 11   | -0.216813 | -0.634729 | 0.898352  | 1.000000  | 1.000      |
| 354  | GOBP-REGULATION-OF-PEPTIDYL-TYROSINE-PHOSPHORY... | 9    | -0.226525 | -0.635775 | 0.904286  | 1.000000  | 1.000      |
| 355  | GOBP-REGULATION-OF-PROTEIN-KINASE-ACTIVITY        | 21   | -0.182486 | -0.635993 | 0.909677  | 1.000000  | 1.000      |
| 356  | GOBP-POSITIVE-REGULATION-OF-LOCOMOTION            | 11   | -0.215677 | -0.640106 | 0.895714  | 1.000000  | 1.000      |
| 357  | REACTOME-INTERLEUKIN-17-SIGNALING                 | 6    | -0.265749 | -0.641903 | 0.892012  | 1.000000  | 1.000      |
| 358  | GOBP-MUSCLE-STRUCTURE-DEVELOPMENT                 | 16   | -0.197464 | -0.646219 | 0.886792  | 1.000000  | 1.000      |
| 359  | GOBP-POSITIVE-REGULATION-OF-PROTEIN-SERINE-THR... | 9    | -0.242535 | -0.648824 | 0.878437  | 1.000000  | 1.000      |
| 360  | GOBP-ANATOMICAL-STRUCTURE-HOMEOSTASIS             | 7    | -0.252779 | -0.649021 | 0.885246  | 1.000000  | 1.000      |
| 361  | GOBP-NEGATIVE-REGULATION-OF-PROTEIN-CATABOLIC...  | 5    | -0.291270 | -0.655322 | 0.899038  | 1.000000  | 1.000      |
| 362  | GOBP-MONOCARBOXYLIC-ACID-TRANSPORT                | 5    | -0.293809 | -0.655807 | 0.894495  | 1.000000  | 1.000      |
| 363  | GOBP-CELLULAR-RESPONSE-TO-NITROGEN-COMPOUND       | 20   | -0.186747 | -0.657272 | 0.900937  | 1.000000  | 1.000      |
| 364  | GOBP-DICARBOXYLIC-ACID-TRANSPORT                  | 5    | -0.293809 | -0.666263 | 0.873684  | 1.000000  | 1.000      |
| 365  | GOBP-REGULATION-OF-PROTEIN-MODIFICATION-PROCESS   | 28   | -0.179845 | -0.667107 | 0.881013  | 1.000000  | 1.000      |
| 366  | REACTOME-EPHLEPHRIN-SIGNALING                     | 6    | -0.276592 | -0.669302 | 0.873457  | 1.000000  | 1.000      |
| 367  | GOBP-REGULATION-OF-INTRACELLULAR-SIGNAL-TRANSD... | 21   | -0.190509 | -0.671656 | 0.879630  | 1.000000  | 1.000      |
| 368  | GOBP-CELLULAR-RESPONSE-TO-KETONE                  | 5    | -0.295317 | -0.674412 | 0.875583  | 1.000000  | 1.000      |
| 369  | GOBP-SKELETAL-MUSCLE-ORGAN-DEVELOPMENT            | 5    | -0.302378 | -0.676887 | 0.866373  | 1.000000  | 1.000      |
| 370  | GOBP-MONOAMINE-TRANSPORT                          | 5    | -0.298117 | -0.677362 | 0.868657  | 1.000000  | 1.000      |
| 371  | GOBP-ACIDIC-AMINO-ACID-TRANSPORT                  | 5    | -0.293809 | -0.677600 | 0.898551  | 1.000000  | 1.000      |
| 372  | GOBP-RESPONSE-TO-INORGANIC-SUBSTANCE              | 19   | -0.196844 | -0.677900 | 0.875170  | 1.000000  | 1.000      |
| 373  | GOBP-MONONUCLEAR-CELL-DIFFERENTIATION             | 7    | -0.270377 | -0.678575 | 0.848921  | 1.000000  | 1.000      |
| 374  | GOBP-POSITIVE-REGULATION-OF-CYTOKINE-PRODUCTION   | 7    | -0.267851 | -0.679774 | 0.873039  | 1.000000  | 1.000      |
| 375  | GOBP-LOCOMOTION                                   | 31   | -0.183327 | -0.680395 | 0.873724  | 1.000000  | 1.000      |
| 376  | GOBP-CHROMOSOME-ORGANIZATION                      | 6    | -0.277617 | -0.681208 | 0.844512  | 1.000000  | 1.000      |
| 377  | GOBP-T-CELL-ACTIVATION                            | 8    | -0.263519 | -0.683695 | 0.851485  | 1.000000  | 1.000      |
| 378  | GOBP-RESPONSE-TO-ABIOTIC-STIMULUS                 | 27   | -0.184636 | -0.683808 | 0.871665  | 1.000000  | 1.000      |
| 379  | GOBP-RESPONSE-TO-NITROGEN-COMPOUND                | 35   | -0.181536 | -0.689073 | 0.864365  | 1.000000  | 1.000      |
| 380  | GOBP-ERBB-SIGNALING-PATHWAY                       | 5    | -0.310468 | -0.692087 | 0.855590  | 1.000000  | 1.000      |
| 381  | GOBP-DEFENSE-RESPONSE-TO-OTHER-ORGANISM           | 9    | -0.257580 | -0.699363 | 0.847645  | 1.000000  | 1.000      |
| 382  | GOBP-CELLULAR-RESPONSE-TO-ALCOHOL                 | 5    | -0.310764 | -0.702464 | 0.844720  | 1.000000  | 1.000      |
| 383  | GOBP-AMYLOID-PRECURSOR-PROTEIN-METABOLIC-PROCESS  | 5    | -0.311497 | -0.703389 | 0.848485  | 1.000000  | 1.000      |
| 384  | GOBP-AMYLOID-BETA-METABOLIC-PROCESS               | 5    | -0.311497 | -0.703760 | 0.842795  | 1.000000  | 1.000      |

Continuation of Table S5

| NAME                                                  | ID            | SIZE | ES        | NES       | NOM.p.val | FDR.q.val | FWER.p.val |
|-------------------------------------------------------|---------------|------|-----------|-----------|-----------|-----------|------------|
| 385 GOBP-CELLULAR-GLUCOSE-HOMEOSTASIS                 | GO-0001678    | 5    | -0.312020 | -0.705921 | 0.858730  | 1.000000  | 1.000      |
| 386 GOBP-PEPTIDYL-TYROSINE-MODIFICATION               | GO-0018212    | 10   | -0.246353 | -0.708059 | 0.829132  | 1.000000  | 1.000      |
| 387 GOBP-CIRCULATORY_SYSTEM_PROCESS                   | GO-0003013    | 5    | -0.308379 | -0.709256 | 0.831832  | 1.000000  | 1.000      |
| 388 GOBP-ASSOCIATIVE-LEARNING                         | GO-0008306    | 7    | -0.276491 | -0.710629 | 0.806735  | 1.000000  | 1.000      |
| 389 GOBP-POSITIVE-REGULATION-OF-CELL-ADHESION         | GO-00045785   | 7    | -0.282950 | -0.711715 | 0.823009  | 1.000000  | 1.000      |
| 390 GOBP-AMYLOID-PRECURSOR-PROTEIN-CATABOLIC-PROCESS  | GO-00042987   | 5    | -0.311497 | -0.712191 | 0.825000  | 1.000000  | 1.000      |
| 391 REACTOME-SIGNALING-BY-NTRK2-TRKB                  | R-RNO-9006115 | 6    | -0.298219 | -0.712497 | 0.818862  | 1.000000  | 1.000      |
| 392 GOBP-POSITIVE-REGULATION-OF-PHOSPHORUS-METABOL... | GO-0010562    | 23   | -0.200352 | -0.715360 | 0.832011  | 1.000000  | 1.000      |
| 393 GOBP-ACTIVATION-OF-MAPK-ACTIVITY                  | GO-0000187    | 6    | -0.297942 | -0.720217 | 0.827534  | 1.000000  | 1.000      |
| 394 GOBP-NEGATIVE-REGULATION-OF-NEURON-DEATH          | GO-1901215    | 11   | -0.243287 | -0.720913 | 0.820225  | 1.000000  | 1.000      |
| 395 GOBP-DEPHOSPHORYLATION                            | GO-0016311    | 7    | -0.289380 | -0.721810 | 0.801161  | 1.000000  | 1.000      |
| 396 GOBP-REGULATION-OF-ANION-TRANSPORT                | GO-0004070    | 20   | -0.207736 | -0.722120 | 0.822493  | 1.000000  | 1.000      |
| 397 GOBP-SMALL-MOLECULE-METABOLIC-PROCESS             | GO-00044281   | 16   | -0.219801 | -0.723830 | 0.806011  | 1.000000  | 1.000      |
| 398 GOBP-REGULATION-OF-CELLULAR-CATABOLIC-PROCESS     | GO-0031329    | 10   | -0.253143 | -0.724799 | 0.829545  | 1.000000  | 1.000      |
| 399 GOBP-POSITIVE-REGULATION-OF-MAP-KINASE-ACTIVITY   | GO-00043406   | 6    | -0.297942 | -0.728063 | 0.808219  | 1.000000  | 1.000      |
| 400 GOBP-PROTEIN-DEPHOSPHORYLATION                    | GO-0006470    | 7    | -0.289380 | -0.728410 | 0.810089  | 1.000000  | 1.000      |
| 401 GOBP-CELL-CYCLE                                   | GO-0007049    | 21   | -0.210750 | -0.728811 | 0.810667  | 1.000000  | 1.000      |
| 402 GOBP-RESPONSE-TO-BIOTIC-STIMULUS                  | GO-0009607    | 17   | -0.220579 | -0.730327 | 0.809652  | 1.000000  | 1.000      |
| 403 GOBP-PLATELET-ACTIVATION                          | GO-0030168    | 6    | -0.301307 | -0.731528 | 0.820000  | 1.000000  | 1.000      |
| 404 REACTOME-INNATE-IMMUNE-SYSTEM                     | R-RNO-168249  | 16   | -0.219605 | -0.731597 | 0.809079  | 1.000000  | 1.000      |
| 405 GOBP-POSITIVE-REGULATION-OF-PROTEIN-PHOSPHORYL... | GO-0001934    | 12   | -0.207491 | -0.733522 | 0.826087  | 1.000000  | 1.000      |
| 406 GOBP-MULTICELLULAR-ORGANISM-REPRODUCTION          | GO-0032504    | 22   | -0.238146 | -0.733641 | 0.811921  | 1.000000  | 1.000      |
| 407 GOBP-POSITIVE-REGULATION-OF-PROTEIN-KINASE-ACT... | GO-00045860   | 18   | -0.221264 | -0.736282 | 0.798408  | 1.000000  | 1.000      |
| 408 GOBP-POSITIVE-REGULATION-OF-PROTEIN-MODIFICATI... | GO-0031401    | 22   | -0.207491 | -0.741944 | 0.809524  | 1.000000  | 1.000      |
| 409 GOBP-HOMEOSTASIS-OF-NUMBER-OF-CELLS               | GO-00048872   | 5    | -0.323521 | -0.742061 | 0.800578  | 1.000000  | 1.000      |
| 410 GOBP-MUSCLE-CELL-DIFFERENTIATION                  | GO-00042692   | 10   | -0.262719 | -0.746703 | 0.768202  | 1.000000  | 1.000      |
| 411 GOBP-RESPONSE-TO-TEMPERATURE-STIMULUS             | GO-0009266    | 9    | -0.272981 | -0.747637 | 0.792264  | 1.000000  | 1.000      |
| 412 REACTOME-MAPK-TARGETS-NUCLEAR-EVENTS-MEDIATED...  | R-HSA-450282  | 5    | -0.333901 | -0.748503 | 0.793003  | 1.000000  | 1.000      |
| 413 GOBP-CELLULAR-RESPONSE-TO-PEPTIDE                 | GO-1901653    | 13   | -0.241345 | -0.749480 | 0.763636  | 1.000000  | 1.000      |
| 414 GOBP-CENTRAL-NERVOUS-SYSTEM-NEURON-DIFFERENTIA... | GO-0021953    | 5    | -0.331574 | -0.750266 | 0.812312  | 1.000000  | 1.000      |
| 415 REACTOME-VESICLE-MEDIATED-TRANSPORT               | R-RNO-5653656 | 5    | -0.327005 | -0.752737 | 0.788344  | 1.000000  | 1.000      |
| 416 REACTOME-EXTRACELLULAR-MATRIX-ORGANIZATION        | R-RNO-1474244 | 5    | -0.335918 | -0.753219 | 0.803077  | 1.000000  | 1.000      |
| 417 REACTOME-SIGNALING-BY-RECEPTOR-TYROSINE-KINASES   | R-RNO-9006934 | 26   | -0.204605 | -0.755485 | 0.774667  | 1.000000  | 1.000      |
| 418 REACTOME-MEMBRANE-TRAFFICKING                     | R-RNO-199991  | 5    | -0.327005 | -0.755781 | 0.770739  | 1.000000  | 1.000      |
| 419 REACTOME-SIGNALING-BY-RHO-GTPASES-MIRO-GTPASES... | R-RNO-9716542 | 9    | -0.274540 | -0.756500 | 0.782923  | 1.000000  | 1.000      |
| 420 GOBP-GAMETE-GENERATION                            | GO-0007276    | 9    | -0.273948 | -0.759876 | 0.762663  | 1.000000  | 1.000      |
| 421 GOBP-POSITIVE-REGULATION-OF-CATION-TRANSMEMBR...  | GO-1904064    | 5    | -0.333826 | -0.760241 | 0.781011  | 1.000000  | 1.000      |
| 422 REACTOME-RHO-GTPASE-EFFECTORS                     | R-RNO-195258  | 9    | -0.274540 | -0.761089 | 0.771852  | 1.000000  | 1.000      |
| 423 GOBP-LIPID-EXPORT-FROM-CELL                       | GO-0140353    | 5    | -0.334415 | -0.762467 | 0.780635  | 1.000000  | 1.000      |
| 424 GOBP-ORGANIC-ANION-TRANSPORT                      | GO-0015711    | 16   | -0.323244 | -0.765635 | 0.753304  | 1.000000  | 1.000      |
| 425 GOBP-SYNAPSE-ORGANIZATION                         | GO-0050808    | 17   | -0.230488 | -0.768532 | 0.769863  | 1.000000  | 1.000      |
| 426 GOBP-PEPTIDYL-AMINO-ACID-MODIFICATION             | GO-0018193    | 22   | -0.220449 | -0.769306 | 0.791281  | 1.000000  | 1.000      |
| 427 GOBP-APOPTOTIC_PROCESS                            | GO-0006915    | 35   | -0.200042 | -0.771202 | 0.760870  | 1.000000  | 1.000      |

Continuation of Table S5

| NAME                                                  | ID            | SIZE | ES        | NES       | NOM.p.val | FDR.q.val | FWER.p.val |
|-------------------------------------------------------|---------------|------|-----------|-----------|-----------|-----------|------------|
| 428 GOBP-REGULATION-OF-CELL-CYCLE-PROCESS             | GO-0010564    | 5    | -0.339377 | -0.771893 | 0.780089  | 1.000000  | 1.000      |
| 429 GOBP-POSITIVE-REGULATION-OF-TRANSFERASE-ACTIVITY  | GO-0051347    | 19   | -0.225122 | -0.773648 | 0.768340  | 1.000000  | 1.000      |
| 430 GOBP-ESTABLISHMENT-OF-PROTEIN-LOCALIZATION-TO-... | GO-0072594    | 5    | -0.338558 | -0.776894 | 0.761610  | 1.000000  | 1.000      |
| 431 GOBP-AMINO-ACID-TRANSPORT                         | GO-0068665    | 6    | -0.323244 | -0.782134 | 0.766667  | 1.000000  | 1.000      |
| 432 GOBP-REGULATION-OF-LIPID-METABOLIC-PROCESS        | GO-0019216    | 7    | -0.307048 | -0.782303 | 0.734540  | 1.000000  | 1.000      |
| 433 GOBP-RESPIRATORY-SYSTEM-DEVELOPMENT               | GO-0060541    | 6    | -0.320348 | -0.782767 | 0.746334  | 1.000000  | 1.000      |
| 434 GOBP-CIRCADIAN-REGULATION-OF-GENE-EXPRESSION      | GO-0032922    | 5    | -0.349398 | -0.784006 | 0.728614  | 1.000000  | 1.000      |
| 435 GOBP-CARBOXYLIC-ACID-TRANSPORT                    | GO-0046942    | 6    | -0.323244 | -0.793120 | 0.725637  | 1.000000  | 1.000      |
| 436 GOBP-CELLULAR-RESPONSE-TO-INORGANIC-SUBSTANCE     | GO-0071241    | 11   | -0.266601 | -0.793193 | 0.747475  | 1.000000  | 1.000      |
| 437 GOBP-REGULATION-OF-TRANSMEMBRANE-TRANSPORT        | GO-0034762    | 23   | -0.217441 | -0.793702 | 0.730220  | 1.000000  | 1.000      |
| 438 GOBP-REGULATION-OF-PROTEIN-LOCALIZATION-TO-MEM... | GO-1905475    | 7    | -0.312449 | -0.796260 | 0.731118  | 1.000000  | 1.000      |
| 439 GOBP-REGULATION-OF-RESPONSE-TO-STRESS             | GO-0080134    | 19   | -0.234215 | -0.796425 | 0.733424  | 1.000000  | 1.000      |
| 440 GOBP-POSITIVE-REGULATION-OF-MOLECULAR-FUNCTION    | GO-0044093    | 37   | -0.206058 | -0.797471 | 0.737288  | 1.000000  | 1.000      |
| 441 GOBP-BIOLOGICAL-ADHESION                          | GO-0022610    | 19   | -0.236392 | -0.803917 | 0.728972  | 1.000000  | 1.000      |
| 442 REACTOME-LEISHMANIA-INFECTION                     | R-HSA-9658195 | 10   | -0.278933 | -0.804883 | 0.691069  | 1.000000  | 1.000      |
| 443 GOBP-REGULATION-OF-CELL-ADHESION                  | GO-0030155    | 13   | -0.258851 | -0.805770 | 0.714882  | 1.000000  | 1.000      |
| 444 GOBP-SENSORY-ORGAN-DEVELOPMENT                    | GO-0007423    | 8    | -0.307285 | -0.807310 | 0.715318  | 1.000000  | 1.000      |
| 445 GOBP-MULTICELLULAR-ORGANISMAL-HOMEOSTASIS         | GO-0048871    | 12   | -0.264123 | -0.808954 | 0.723202  | 1.000000  | 1.000      |
| 446 GOBP-REGULATION-OF-RESPONSE-TO-EXTERNAL-STIMULUS  | GO-0032101    | 15   | -0.254428 | -0.821245 | 0.700134  | 1.000000  | 1.000      |
| 447 GOBP-IMMUNE-EFFECTOR-PROCESS                      | GO-0002252    | 11   | -0.281436 | -0.822938 | 0.686301  | 1.000000  | 1.000      |
| 448 GOBP-RESPONSE-TO-MONOSACCHARIDE                   | GO-0034284    | 5    | -0.365476 | -0.823316 | 0.705710  | 1.000000  | 1.000      |
| 449 GOBP-RHYTHMIC-PROCESS                             | GO-0048511    | 15   | -0.257778 | -0.826658 | 0.693570  | 1.000000  | 1.000      |
| 450 GOBP-TELENCEPHALON-DEVELOPMENT                    | GO-0021537    | 7    | -0.321181 | -0.827266 | 0.679882  | 1.000000  | 1.000      |
| 451 REACTOME-PLATELET-ACTIVATION-SIGNALING-AND-AGG... | R-HSA-76002   | 7    | -0.317564 | -0.827559 | 0.678211  | 1.000000  | 1.000      |
| 452 GOBP-REGULATION-OF-IMMUNE-SYSTEM-PROCESS          | GO-0002682    | 21   | -0.234910 | -0.827626 | 0.684140  | 1.000000  | 1.000      |
| 453 GOBP-NEURON-DEATH                                 | GO-0070997    | 18   | -0.239845 | -0.829061 | 0.687500  | 1.000000  | 1.000      |
| 454 GOBP-CELL-MIGRATION                               | GO-0016477    | 22   | -0.238468 | -0.829568 | 0.691250  | 1.000000  | 1.000      |
| 455 GOBP-REGULATION-OF-CELL-DEATH                     | GO-0010941    | 34   | -0.215446 | -0.829630 | 0.695980  | 1.000000  | 1.000      |
| 456 GOBP-STRIATED-MUSCLE-CELL-DIFFERENTIATION         | GO-0051146    | 9    | -0.304984 | -0.830258 | 0.681223  | 1.000000  | 1.000      |
| 457 GOBP-RESPONSE-TO-CARBOHYDRATE                     | GO-0009743    | 5    | -0.365476 | -0.833841 | 0.708649  | 1.000000  | 1.000      |
| 458 GOBP-TUBE-MORPHOGENESIS                           | GO-0035239    | 15   | -0.256775 | -0.838581 | 0.658311  | 1.000000  | 1.000      |
| 459 GOBP-CARBOHYDRATE-HOMEOSTASIS                     | GO-0033500    | 7    | -0.332355 | -0.850939 | 0.660920  | 1.000000  | 1.000      |
| 460 GOBP-TISSUE-MIGRATION                             | GO-0090130    | 9    | -0.309178 | -0.851428 | 0.661383  | 1.000000  | 1.000      |
| 461 GOBP-MITOTIC-CELL-CYCLE                           | GO-0000278    | 10   | -0.296632 | -0.852302 | 0.649275  | 1.000000  | 1.000      |
| 462 REACTOME-CIRCADIAN-CLOCK                          | R-HSA-400253  | 5    | -0.373494 | -0.856573 | 0.635682  | 1.000000  | 1.000      |
| 463 GOBP-REGULATION-OF-CATABOLIC-PROCESS              | GO-0009894    | 13   | -0.274172 | -0.856708 | 0.641407  | 1.000000  | 1.000      |
| 464 GOBP-CELL-JUNCTION-ORGANIZATION                   | GO-0034330    | 19   | -0.249545 | -0.856859 | 0.646277  | 1.000000  | 1.000      |
| 465 GOBP-REGULATION-OF-ANATOMICAL-STRUCTURE-MORPHO... | GO-0022603    | 17   | -0.262149 | -0.860661 | 0.643048  | 1.000000  | 1.000      |
| 466 GOBP-CELL-CELL-ADHESION                           | GO-0098609    | 14   | -0.274765 | -0.866736 | 0.635628  | 1.000000  | 1.000      |
| 467 GOBP-CELLULAR-RESPONSE-TO-HORMONE-STIMULUS        | GO-0032870    | 11   | -0.290648 | -0.872792 | 0.627143  | 1.000000  | 1.000      |
| 468 GOBP-BLOOD-VESEL-MORPHOGENESIS                    | GO-0048514    | 14   | -0.279892 | -0.872879 | 0.643855  | 1.000000  | 1.000      |
| 469 GOBP-REGULATION-OF-NEURONAL-SYNAPTIC-PLASTICITY   | GO-0048168    | 7    | -0.335622 | -0.874521 | 0.615942  | 1.000000  | 1.000      |
| 470 GOBP-NEGATIVE-REGULATION-OF-CELL-PROJECTION-OR... | GO-0031345    | 5    | -0.383003 | -0.875758 | 0.629179  | 1.000000  | 1.000      |

Continuation of Table S5

| NAME | ID                                                | SIZE | ES        | NES       | NOM.p.val | FDR.q.val | FWER.p.val |
|------|---------------------------------------------------|------|-----------|-----------|-----------|-----------|------------|
| 471  | GOBP-POSITIVE-REGULATION_OF_IMMUNE-SYSTEM-PROCESS | 18   | -0.258453 | -0.879661 | 0.632708  | 1.000000  | 1.000      |
| 472  | GOBP-REGULATION_OF_WNT-SIGNALING-PATHWAY          | 5    | -0.395471 | -0.884154 | 0.610687  | 1.000000  | 1.000      |
| 473  | GOBP-REGULATION_OF_MAP-KINASE-ACTIVITY            | 9    | -0.322160 | -0.884190 | 0.598582  | 1.000000  | 1.000      |
| 474  | GOBP-PEPTIDYL-LYSINE-MODIFICATION                 | 5    | -0.391495 | -0.888295 | 0.643312  | 1.000000  | 1.000      |
| 475  | GOBP-SEXUAL-REPRODUCTION                          | 10   | -0.314355 | -0.891089 | 0.590071  | 1.000000  | 1.000      |
| 476  | GOBP-CALCIUM-MEDIATED-SIGNALING                   | 10   | -0.315934 | -0.891198 | 0.611501  | 1.000000  | 1.000      |
| 477  | GOBP-REGULATION_OF_CELLULAR-LOCALIZATION          | 17   | -0.274508 | -0.894899 | 0.609986  | 1.000000  | 1.000      |
| 478  | GOBP-CIRCADIAN-RHYTHM                             | 13   | -0.295592 | -0.905154 | 0.577291  | 0.996750  | 1.000      |
| 479  | GOBP-POSITIVE-REGULATION_OF_MAPK-CASCADE          | 9    | -0.325948 | -0.907033 | 0.587798  | 0.996614  | 1.000      |
| 480  | GOBP-REGULATION_OF_CELL-ACTIVATION                | 8    | -0.340617 | -0.908737 | 0.578717  | 0.996946  | 1.000      |
| 481  | GOBP-EPITHELIAL-CELL-PROLIFERATION                | 12   | -0.301305 | -0.909481 | 0.596369  | 0.999249  | 1.000      |
| 482  | GOBP-POSITIVE-REGULATION_OF_PROTEIN-TYROSINE-K... | 5    | -0.403548 | -0.911582 | 0.591528  | 0.998459  | 1.000      |
| 483  | GOBP-REGULATION_OF_PROTEIN-TYROSINE-KINASE-ACT... | 5    | -0.403548 | -0.915351 | 0.560676  | 0.993935  | 1.000      |
| 484  | GOBP-REGULATION_OF_MUSCLE-SYSTEM-PROCESS          | 8    | -0.347726 | -0.915399 | 0.568421  | 0.997964  | 1.000      |
| 485  | GOBP-POSITIVE-REGULATION_OF_INTRACELLULAR-SIGN... | 14   | -0.294460 | -0.916403 | 0.574555  | 0.999835  | 1.000      |
| 486  | GOBP-LYMPHOCTE-ACTIVATION                         | 10   | -0.323123 | -0.930313 | 0.552478  | 0.972004  | 1.000      |
| 487  | GOBP-CIRCULATORY-SYSTEM-DEVELOPMENT               | 21   | -0.262992 | -0.933827 | 0.540880  | 0.967834  | 1.000      |
| 488  | GOBP-REGULATION_OF_CIRCADIAN-RHYTHM               | 7    | -0.327184 | -0.934106 | 0.554252  | 0.971330  | 1.000      |
| 489  | GOBP-PROTEIN-PHOSPHORYLATION                      | 33   | -0.242364 | -0.935852 | 0.553506  | 0.971579  | 1.000      |
| 490  | GOBP-CELLULAR-MACROMOLECULE-CATABOLIC-PROCESS     | 5    | -0.417827 | -0.940497 | 0.559091  | 0.964810  | 1.000      |
| 491  | GOBP-CELL-CELL-JUNCTION-ORGANIZATION              | 6    | -0.395485 | -0.940940 | 0.538020  | 0.967831  | 1.000      |
| 492  | GOBP-PROTEIN-LOCALIZATION_TO_CELL-PERIPHERY       | 12   | -0.314197 | -0.941910 | 0.542974  | 0.969608  | 1.000      |
| 493  | GOBP-PROTEIN-MODIFICATION_BY_SMALL-PROTEIN.CON... | 6    | -0.389379 | -0.943226 | 0.554723  | 0.970605  | 1.000      |
| 494  | GOBP-REGULATION_OF_NEURON-PROJECTION-DEVELOPMENT  | 16   | -0.282208 | -0.944588 | 0.521439  | 0.971559  | 1.000      |
| 495  | GOBP-CENTRAL-NERVOUS-SYSTEM-DEVELOPMENT           | 27   | -0.256103 | -0.944771 | 0.550576  | 0.975309  | 1.000      |
| 496  | GOBP-REGULATION_OF-ENDOCYTOSIS                    | 6    | -0.398807 | -0.946638 | 0.568862  | 0.975089  | 1.000      |
| 497  | GOBP-AXON-DEVELOPMENT                             | 18   | -0.283046 | -0.950842 | 0.543276  | 0.969301  | 1.000      |
| 498  | GOBP-POSITIVE-REGULATION_OF_PROTEIN-METABOLIC...  | 27   | -0.259447 | -0.952026 | 0.543004  | 0.970694  | 1.000      |
| 499  | GOBP-SPROUTING-ANGIOGENESIS                       | 5    | -0.420122 | -0.955045 | 0.542768  | 0.967700  | 1.000      |
| 500  | GOBP-PURINE-CONTAINING-COMPOUND-METABOLIC-PROCESS | 6    | -0.386103 | -0.957643 | 0.537267  | 0.965856  | 1.000      |
| 501  | GOBP-REGULATION_OF_BODY-FLUID-LEVELS              | 11   | -0.326088 | -0.959936 | 0.520115  | 0.964429  | 1.000      |
| 502  | GOBP-EXOCYTOSIS                                   | 11   | -0.321785 | -0.961342 | 0.516173  | 0.965223  | 1.000      |
| 503  | GOBP-PROTEIN-LOCALIZATION_TO_CELL-JUNCTION        | 6    | -0.402573 | -0.971952 | 0.500768  | 0.943795  | 1.000      |
| 504  | GOBP-REGULATION_OF_SYNAPSE-STRUCTURE_OR-ACTIVITY  | 11   | -0.330094 | -0.972336 | 0.487004  | 0.947079  | 1.000      |
| 505  | GOBP-MALE-GAMETE-GENERATION                       | 5    | -0.426195 | -0.972425 | 0.513057  | 0.951202  | 1.000      |
| 506  | GOBP-AMEBODAL-TYPE-CELL-MIGRATION                 | 11   | -0.327019 | -0.972450 | 0.503516  | 0.955485  | 1.000      |
| 507  | GOBP-FOREBRAIN-DEVELOPMENT                        | 10   | -0.344674 | -0.975063 | 0.516499  | 0.953487  | 1.000      |
| 508  | GOBP-REGULATION_OF_MAPK-CASCADE                   | 13   | -0.321373 | -0.977187 | 0.480716  | 0.952786  | 1.000      |
| 509  | GOBP-POSITIVE-REGULATION_OF_TRANSPORT             | 26   | -0.266585 | -0.983980 | 0.498084  | 0.940118  | 1.000      |
| 510  | GOBP-GLIAL-CELL-DIFFERENTIATION                   | 10   | -0.346183 | -0.986430 | 0.459459  | 0.938326  | 1.000      |
| 511  | GOBP-RESPONSE_TO-ALCOHOL                          | 11   | -0.343565 | -0.989141 | 0.493671  | 0.936128  | 1.000      |
| 512  | GOBP-NEURON-PROJECTION-GUIDANCE                   | 9    | -0.353126 | -0.990130 | 0.462774  | 0.938104  | 1.000      |
| 513  | REACTOME-ONCOGENIC_MAPK-SIGNALING                 | 5    | -0.440195 | -0.996555 | 0.476831  | 0.926206  | 1.000      |
|      | R-HSA-6802957                                     |      |           |           |           |           |            |

Continuation of Table S5

| NAME                                                   | ID            | SIZE | ES        | NES       | NOM.p.val | FDR.q.val | FWER.p.val |
|--------------------------------------------------------|---------------|------|-----------|-----------|-----------|-----------|------------|
| 514 REACTOME_DEVELOPMENTAL_BIOLOGY                     | R-RNO-1266738 | 22   | -0.281109 | -0.998516 | 0.476821  | 0.925710  | 1.000      |
| 515 GOBP_ENDOTHELIAL_CELL_MIGRATION                    | GO-0043542    | 8    | -0.377832 | -1.004041 | 0.476744  | 0.916032  | 1.000      |
| 516 GOBP_REGULATION_OF_VASCULATURE_DEVELOPMENT         | GO-1901342    | 5    | -0.449891 | -1.004316 | 0.425150  | 0.919721  | 1.000      |
| 517 GOBP_PROTEIN_LOCALIZATION_TO_MEMBRANE              | GO-0072657    | 13   | -0.323366 | -1.004966 | 0.464888  | 0.922488  | 1.000      |
| 518 GOBP_INTRACELLULAR_TRANSPORT                       | GO-0046907    | 10   | -0.35783  | -1.007695 | 0.448611  | 0.920180  | 1.000      |
| 519 GOBP_CELLULAR_COMPONENT_MAINTENANCE                | GO-0043954    | 5    | -0.433462 | -1.007782 | 0.446617  | 0.924432  | 1.000      |
| 520 GOBP_MUSCLE_ORGAN_DEVELOPMENT                      | GO-0007517    | 9    | -0.378375 | -1.009409 | 0.479315  | 0.924728  | 1.000      |
| 521 GOBP_MUSCLE_SYSTEM_PROCESS                         | GO-0003012    | 9    | -0.366025 | -1.011933 | 0.449422  | 0.922697  | 1.000      |
| 522 GOBP_REGULATION_OF_HEMOPOIESIS                     | GO-1903706    | 10   | -0.360966 | -1.019880 | 0.421127  | 0.906657  | 1.000      |
| 523 GOBP_BLOOD_VESSEL_ENDOTHELIAL_CELL_MIGRATION       | GO-0043534    | 8    | -0.377832 | -1.024280 | 0.443299  | 0.900035  | 1.000      |
| 524 GOBP_REGULATION_OF_PEPTIDE_SECRETION               | GO-0002791    | 7    | -0.395011 | -1.025774 | 0.433934  | 0.900871  | 1.000      |
| 525 GOBP_POSITIVE_REGULATION_OF_HEMOPOIESIS            | GO-1903708    | 7    | -0.410507 | -1.030707 | 0.411504  | 0.892795  | 1.000      |
| 526 GOBP_EPITHELIAL_CELL_DIFFERENTIATION               | GO-0030855    | 7    | -0.400149 | -1.035708 | 0.418262  | 0.884234  | 1.000      |
| 527 GOBP_NUCLEAR_TRANSPORT                             | GO-0051169    | 5    | -0.460295 | -1.035780 | 0.429688  | 0.885527  | 1.000      |
| 528 GOBP_REGULATION_OF_LEUKOCYTE_DIFFERENTIATION       | GO-1902105    | 9    | -0.371039 | -1.036228 | 0.435821  | 0.891812  | 1.000      |
| 529 GOBP_LONG_TERM_MEMORY                              | GO-0007616    | 6    | -0.451417 | -1.036466 | 0.428788  | 0.895810  | 1.000      |
| 530 GOBP_POSITIVE_REGULATION_OF_NEURON_PROJECTION...   | GO-0010976    | 5    | -0.442084 | -1.036466 | 0.431962  | 0.900404  | 1.000      |
| 531 GOBP_ORGANOPHOSPHATE_METABOLIC_PROCESS             | GO-0019637    | 8    | -0.385531 | -1.036598 | 0.442136  | 0.904717  | 1.000      |
| 532 GOBP_TEMPERATURE_HOMEOSTASIS                       | GO-0001659    | 5    | -0.455909 | -1.037162 | 0.429675  | 0.907901  | 1.000      |
| 533 GOBP_CELLULAR_RESPONSE_TO_PEPTIDE_HORMONE_STIM...  | GO-0071375    | 9    | -0.377563 | -1.038800 | 0.418571  | 0.908253  | 1.000      |
| 534 GOBP_CARBOHYDRATE_DERIVATIVE_BIOSYNTHETIC_PROCESS  | GO-1901137    | 5    | -0.457765 | -1.045399 | 0.426357  | 0.895250  | 1.000      |
| 535 GOBP_NUCLEOBASE_CONTAINING_SMALL_MOLECULE_META...  | GO-0055086    | 7    | -0.415064 | -1.049634 | 0.425339  | 0.888533  | 1.000      |
| 536 GOBP_RESPONSE_TO_NICOTINE                          | GO-0035094    | 7    | -0.407623 | -1.049682 | 0.397644  | 0.893095  | 1.000      |
| 537 GOBP_TUBE_DEVELOPMENT                              | GO-0035295    | 18   | -0.310344 | -1.051992 | 0.390789  | 0.891598  | 1.000      |
| 538 GOBP_MYELOID_LEUKOCYTE_ACTIVATION                  | GO-0002274    | 8    | -0.389150 | -1.053754 | 0.403400  | 0.891538  | 1.000      |
| 539 GOBP_MYELOID_LEUKOCYTE_MEDIATED_IMMUNITY           | GO-0002444    | 6    | -0.445698 | -1.054499 | 0.426829  | 0.894422  | 1.000      |
| 540 REACTOME_G_ALPHA_Q_SIGNALING_EVENTS                | R-RNO-416476  | 6    | -0.439024 | -1.056116 | 0.405286  | 0.894825  | 1.000      |
| 541 GOBP_CELLULAR_MACROMOLECULE_LOCALIZATION           | GO-0070727    | 20   | -0.305042 | -1.056512 | 0.395532  | 0.898573  | 1.000      |
| 542 GOBP_MEMORY                                        | GO-0007613    | 13   | -0.338720 | -1.057839 | 0.393243  | 0.899976  | 1.000      |
| 543 GOBP_TRANSMEMBRANE_TRANSPORT                       | GO-0055085    | 27   | -0.286747 | -1.060515 | 0.377432  | 0.897526  | 1.000      |
| 544 GOBP_RESPONSE_TO_PEPTIDE_HORMONE                   | GO-0043434    | 13   | -0.338051 | -1.061078 | 0.396957  | 0.900942  | 1.000      |
| 545 GOBP_POSITIVE_REGULATION_OF_SIGNALING              | GO-0023056    | 34   | -0.277169 | -1.063749 | 0.384324  | 0.898211  | 1.000      |
| 546 GOBP_REGULATION_OF_LONG_TERM_SYNAPTIC_POTENTIAL... | GO-1900271    | 6    | -0.448094 | -1.064461 | 0.391502  | 0.901144  | 1.000      |
| 547 REACTOME_CLASS_C_3_METABOTROPIC_GLUTAMATE_PHER...  | R-RNO-420499  | 7    | -0.422220 | -1.069713 | 0.386724  | 0.891695  | 1.000      |
| 548 GOBP_LEUKOCYTE_MEDIATED_IMMUNITY                   | GO-0002443    | 8    | -0.399168 | -1.073443 | 0.377504  | 0.886323  | 1.000      |
| 549 GOBP_CELL_ACTIVATION_INVOLVED_IN_IMMUNE_RESPONSE   | GO-0002263    | 7    | -0.445698 | -1.075784 | 0.395173  | 0.884776  | 1.000      |
| 550 GOBP_RESPONSE_TO_HEAT                              | GO-0009408    | 6    | -0.424892 | -1.077888 | 0.387240  | 0.883886  | 1.000      |
| 551 GOBP_MAPK_CASCADE                                  | GO-0000165    | 18   | -0.320411 | -1.078210 | 0.383091  | 0.888087  | 1.000      |
| 552 GOBP_NEGATIVE_REGULATION_OF_SYNAPTIC_TRANSMISSION  | GO-0050805    | 6    | -0.451107 | -1.079409 | 0.379573  | 0.889906  | 1.000      |
| 553 GOBP_COGNITION                                     | GO-0050890    | 28   | -0.292021 | -1.079725 | 0.375813  | 0.894142  | 1.000      |
| 554 GOBP_VASCULATURE_DEVELOPMENT                       | GO-0001944    | 17   | -0.321373 | -1.080094 | 0.358090  | 0.898204  | 1.000      |
| 555 REACTOME_CELL_CYCLE                                | R-RNO-1640170 | 6    | -0.458818 | -1.093210 | 0.372488  | 0.866146  | 1.000      |
| 556 REACTOME_NEUTROPHIL_DEGRANULATION                  | R-RNO-6798695 | 6    | -0.445698 | -1.096194 | 0.373457  | 0.862775  | 1.000      |

Continuation of Table S5

| NAME | ID                                                | SIZE | ES        | NES       | NOM.p.val | FDR.q.val | FWER.p.val |
|------|---------------------------------------------------|------|-----------|-----------|-----------|-----------|------------|
| 557  | GOBP-REGULATION-OF-PROTEIN-LOCALIZATION           | 18   | -0.323209 | -1.09852  | 0.344737  | 0.866107  | 1.000      |
| 558  | GOBP-NEURON-DIFFERENTIATION                       | 37   | -0.287265 | -1.101198 | 0.342172  | 0.858856  | 1.000      |
| 559  | REACTOME-ANTIINFLAMMATORY-RESPONSEFAVOURING...    | 5    | -0.485363 | -1.102138 | 0.328149  | 0.861456  | 1.000      |
| 560  | GOBP-POSITIVE-REGULATION-OF-CATALYTIC-ACTIVITY    | 29   | -0.302869 | -1.110952 | 0.328680  | 0.841565  | 1.000      |
| 561  | GOBP-REGULATION-OF-CELL-PROJECTION-ORGANIZATION   | 20   | -0.323391 | -1.111686 | 0.326746  | 0.844505  | 1.000      |
| 562  | GOBP-REGULATION-OF-SYSTEM-PROCESS                 | 18   | -0.333316 | -1.114271 | 0.322709  | 0.842303  | 1.000      |
| 563  | GOBP-REGULATION-OF-PEPTIDE-TRANSPORT              | 10   | -0.385517 | -1.116225 | 0.327485  | 0.842044  | 1.000      |
| 564  | GOBP-GLIOGENESIS                                  | 12   | -0.373068 | -1.116467 | 0.332402  | 0.846537  | 1.000      |
| 565  | GOBP-INNATE-IMMUNE-RESPONSE                       | 7    | -0.438375 | -1.119579 | 0.325000  | 0.842647  | 1.000      |
| 566  | GOBP-REGULATION-OF-TRANSPORTER-ACTIVITY           | 17   | -0.341909 | -1.128813 | 0.322537  | 0.821601  | 1.000      |
| 567  | GOBP-G-PROTEIN-COUPLED-GLUTAMATE-RECEPTOR-SIGN... | 8    | -0.427473 | -1.129670 | 0.321908  | 0.824357  | 1.000      |
| 568  | GOBP-ENDOTHELIAL-CELL-PROLIFERATION               | 8    | -0.433202 | -1.135442 | 0.313146  | 0.813446  | 1.000      |
| 569  | GOBP-CELL-PROJECTION-ORGANIZATION                 | 35   | -0.296628 | -1.136528 | 0.319899  | 0.815514  | 1.000      |
| 570  | GOBP-REGULATION-OF-CELLULAR-RESPONSE-TO-STRESS    | 9    | -0.421220 | -1.137814 | 0.298172  | 0.817192  | 1.000      |
| 571  | GOBP-CELL-ACTIVATION                              | 22   | -0.321017 | -1.139430 | 0.302597  | 0.817760  | 1.000      |
| 572  | GOBP-REGULATION-OF-RECEPTOR-MEDIATED-ENDOCYTOSIS  | 5    | -0.510853 | -1.146482 | 0.297297  | 0.802818  | 1.000      |
| 573  | REACTOME-CELLULAR-RESPONSES-TO-EXTERNAL-STIMULI   | 11   | -0.387303 | -1.146555 | 0.283262  | 0.807904  | 1.000      |
| 574  | GOBP-POSITIVE-REGULATION-OF-LONG-TERM-SYNAPTIC... | 5    | -0.506024 | -1.152335 | 0.281972  | 0.796545  | 1.000      |
| 575  | GOBP-MEMBRANE-ORGANIZATION                        | 12   | -0.374581 | -1.153745 | 0.302452  | 0.797875  | 1.000      |
| 576  | GOBP-RESPONSE-TO-INTERLEUKIN_1                    | 5    | -0.500691 | -1.157027 | 0.296012  | 0.793536  | 1.000      |
| 577  | GOBP-NEUROUS-SYSTEM-PROCESS                       | 38   | -0.301856 | -1.157674 | 0.307039  | 0.793719  | 1.000      |
| 578  | GOBP-NEURON-PROJECTION-ORGANIZATION               | 8    | -0.437919 | -1.159113 | 0.285094  | 0.798021  | 1.000      |
| 579  | GOBP-DENDRITIC-SPINE-MORPHOGENESIS                | 5    | -0.519606 | -1.160395 | 0.254870  | 0.799598  | 1.000      |
| 580  | REACTOME-PTEN-REGULATION                          | 5    | -0.513039 | -1.163592 | 0.255952  | 0.795878  | 1.000      |
| 581  | REACTOME-INTERFERON-SIGNALING                     | 6    | -0.492042 | -1.168554 | 0.274074  | 0.786909  | 1.000      |
| 582  | GOBP-CELLULAR-COMPONENT-MORPHOGENESIS             | 25   | -0.326232 | -1.175816 | 0.264474  | 0.771542  | 1.000      |
| 583  | GOBP-MUSCLE-ADAPTATION                            | 5    | -0.518072 | -1.177493 | 0.248109  | 0.772226  | 1.000      |
| 584  | GOBP-HEAD-DEVELOPMENT                             | 23   | -0.335156 | -1.178667 | 0.267097  | 0.774213  | 1.000      |
| 585  | GOBP-REGULATION-OF-MUSCLE-ADAPTATION              | 5    | -0.518072 | -1.185143 | 0.254237  | 0.760817  | 1.000      |
| 586  | GOBP-POSITIVE-REGULATION-OF-RESPONSE-TO-EXTERN... | 9    | -0.432910 | -1.185663 | 0.261669  | 0.764520  | 1.000      |
| 587  | GOBP-DEVELOPMENTAL-MATURATION                     | 5    | -0.519427 | -1.188422 | 0.224299  | 0.761963  | 1.000      |
| 588  | GOBP-CELL-MORPHOGENESIS                           | 25   | -0.326232 | -1.189264 | 0.244246  | 0.765022  | 1.000      |
| 589  | GOBP-NEUROGENESIS                                 | 41   | -0.307241 | -1.195564 | 0.257538  | 0.751431  | 1.000      |
| 590  | GOBP-RESPONSE-TO-ETHANOL                          | 5    | -0.518072 | -1.198313 | 0.229299  | 0.749010  | 1.000      |
| 591  | GOBP-CELL-PART-MORPHOGENESIS                      | 25   | -0.326232 | -1.198929 | 0.235589  | 0.752741  | 1.000      |
| 592  | GOBP-EXCITATORY-CHEMICAL-SYNAPTIC-TRANSMISSION    | 5    | -0.530120 | -1.200816 | 0.240250  | 0.752915  | 1.000      |
| 593  | GOBP-ADENYLATE-CYCLASE-INHIBITING-G-PROTEIN.CO... | 6    | -0.524630 | -1.205367 | 0.247774  | 0.745292  | 1.000      |
| 594  | GOBP-REGULATION-OF-PEPTIDE-HORMONE-SECRETION      | 5    | -0.497989 | -1.207996 | 0.251553  | 0.749738  | 1.000      |
| 595  | REACTOME-NEUROUS-SYSTEM-DEVELOPMENT               | 14   | -0.384974 | -1.207922 | 0.230014  | 0.749408  | 1.000      |
| 596  | REACTOME-DISEASES-OF-SIGNAL-TRANSDUCTION-BY-GR... | 12   | -0.400232 | -1.208693 | 0.232782  | 0.752815  | 1.000      |
| 597  | GOBP-BEHAVIOR                                     | 33   | -0.313897 | -1.209318 | 0.237009  | 0.756673  | 1.000      |
| 598  | GOBP-INORGANIC-ION-TRANSMEMBRANE-TRANSPORT        | 9    | -0.437255 | -1.215031 | 0.233094  | 0.745281  | 1.000      |
| 599  | REACTOME-INTEGRATION-OF-ENERGY-METABOLISM         | 5    | -0.542169 | -1.215428 | 0.218126  | 0.749986  | 1.000      |

Continuation of Table S5

| NAME                                                  | ID            | SIZE | ES        | NES       | NOM.p.val | FDR.q.val | FWER.p.val |
|-------------------------------------------------------|---------------|------|-----------|-----------|-----------|-----------|------------|
| 600 REACTOME-SIGNALING-BY-WNT                         | R-RNO-195721  | 7    | -0.472307 | -1.217834 | 0.244344  | 0.748684  | 1.000      |
| 601 GOBP-ADENYLATE-CYCLASE-INHIBITING-G-PROTEIN.CO... | GO-0007193    | 9    | -0.442603 | -1.225106 | 0.239377  | 0.733041  | 1.000      |
| 602 GOBP-MYOTUBE-DIFFERENTIATION                      | GO-0014902    | 5    | -0.549237 | -1.225110 | 0.213636  | 0.738988  | 1.000      |
| 603 REACTOME-GPCR-LIGAND-BINDING                      | R-RNO-500792  | 8    | -0.455445 | -1.225461 | 0.215517  | 0.743886  | 1.000      |
| 604 GOBP-ORGANOPHOSPHATE-BIOSYNTHETIC-PROCESS         | GO-00090407   | 5    | -0.542169 | -1.226186 | 0.198767  | 0.748003  | 1.000      |
| 605 REACTOME-POST-TRANSLATIONAL-PROTEIN-MODIFICATION  | R-RNO-597592  | 7    | -0.483870 | -1.228279 | 0.213333  | 0.747932  | 1.000      |
| 606 GOBP-DENDRITIC-SPINE-DEVELOPMENT                  | GO-0060996    | 6    | -0.514146 | -1.230799 | 0.188073  | 0.746690  | 1.000      |
| 607 GOBP-CELL-CELL-SIGNALING-BY-WNT                   | GO-0198738    | 7    | -0.485064 | -1.233844 | 0.228826  | 0.743785  | 1.000      |
| 608 GOBP-HOMEOSTATIC-PROCESS                          | GO-0042592    | 31   | -0.335645 | -1.234088 | 0.209799  | 0.749493  | 1.000      |
| 609 REACTOME-CELL-CYCLE-MITOTIC                       | R-RNO-69278   | 5    | -0.526924 | -1.234144 | 0.211161  | 0.755827  | 1.000      |
| 610 GOBP-SECOND-MESSENGER-MEDIATED-SIGNALING          | GO-0019932    | 16   | -0.378673 | -1.238355 | 0.192513  | 0.749221  | 1.000      |
| 611 GOBP-NEURON-DEVELOPMENT                           | GO-0048666    | 34   | -0.320395 | -1.241070 | 0.221656  | 0.746699  | 1.000      |
| 612 GOBP-NUCLEOSIDE-PHOSPHATE-BIOSYNTHETIC-PROCESS    | GO-1901293    | 5    | -0.542169 | -1.246884 | 0.174962  | 0.734593  | 1.000      |
| 613 GOBP-POSITIVE-REGULATION-OF-EPITHELIAL-CELL-PR... | GO-0050679    | 7    | -0.487329 | -1.250135 | 0.193452  | 0.731198  | 1.000      |
| 614 GOBP-REGULATION-OF-NERVOUS-SYSTEM-PROCESS         | GO-0031644    | 8    | -0.467617 | -1.250251 | 0.229412  | 0.737421  | 1.000      |
| 615 GOBP-POSTSYNAPSE-ORGANIZATION                     | GO-0009173    | 10   | -0.437228 | -1.256209 | 0.178470  | 0.725287  | 1.000      |
| 616 GOBP-REGULATION-OF-SYNAPTIC-TRANSMISSION-GLUTA... | GO-0051966    | 12   | -0.420592 | -1.265240 | 0.184319  | 0.703253  | 1.000      |
| 617 GOBP-ENDOCRINE-SYSTEM-DEVELOPMENT                 | GO-0035270    | 6    | -0.526971 | -1.268268 | 0.179941  | 0.701009  | 1.000      |
| 618 GOBP-NEGATIVE-REGULATION-OF-CELL-CYCLE            | GO-0045786    | 5    | -0.559949 | -1.269146 | 0.172956  | 0.704732  | 1.000      |
| 619 GOBP-CYTOSOLIC-CALCIUM-ION-TRANSPORT              | GO-0060401    | 7    | -0.498614 | -1.270322 | 0.185907  | 0.707914  | 1.000      |
| 620 GOBP-CALCIUM-ION-TRANSPORT-INTO-CYTOSOL           | GO-0060402    | 7    | -0.498614 | -1.272628 | 0.179910  | 0.707091  | 1.000      |
| 621 REACTOME-RNA-POLYMERASE-II-TRANSCRIPTION          | R-RNO-73857   | 20   | -0.366685 | -1.275771 | 0.174834  | 0.703971  | 1.000      |
| 622 REACTOME-BETA-CATENIN-INDEPENDENT-WNT-SIGNALING   | R-RNO-3858494 | 5    | -0.572590 | -1.282820 | 0.163110  | 0.688473  | 1.000      |
| 623 REACTOME-G-ALPHA-Z-SIGNALING-EVENTS               | R-RNO-418597  | 5    | -0.561037 | -1.292813 | 0.170370  | 0.665265  | 1.000      |
| 624 GOBP-PROTEIN-TETRAMERIZATION                      | GO-0051262    | 5    | -0.566225 | -1.295932 | 0.165877  | 0.662187  | 1.000      |
| 625 GOBP-CALCIUM-ION-TRANSMEMBRANE-TRANSPORT          | GO-0070588    | 7    | -0.498614 | -1.301219 | 0.163447  | 0.652376  | 1.000      |
| 626 GOBP-PROTEIN-LOCALIZATION-TO-ORGANELLE            | GO-0033365    | 8    | -0.480056 | -1.301984 | 0.161337  | 0.656814  | 1.000      |
| 627 GOBP-REGULATION-OF-VESICLE-MEDIATED-TRANSPORT     | GO-0060627    | 12   | -0.428572 | -1.304425 | 0.136620  | 0.656393  | 1.000      |
| 628 GOBP-PROTEIN-LOCALIZATION-TO-SYNAPSE              | GO-0035418    | 5    | -0.576570 | -1.305158 | 0.144578  | 0.660929  | 1.000      |
| 629 GOBP-LOCOMOTORY-BEHAVIOR                          | GO-0007626    | 8    | -0.495736 | -1.305407 | 0.152367  | 0.667054  | 1.000      |
| 630 GOBP-CHEMICAL-HOMEOSTASIS                         | GO-0048878    | 23   | -0.363951 | -1.306546 | 0.158311  | 0.670547  | 1.000      |
| 631 GOBP-PROTEIN-LOCALIZATION-TO-POSTSYNAPSE          | GO-0062237    | 5    | -0.576570 | -1.312490 | 0.149390  | 0.659328  | 1.000      |
| 632 GOBP-ENDOMEMBRANE-SYSTEM-ORGANIZATION             | GO-0010256    | 6    | -0.559319 | -1.325217 | 0.124615  | 0.627902  | 1.000      |
| 633 GOBP-REGULATION-OF-NEUROTRANSMITTER-TRANSPORT     | GO-0051588    | 6    | -0.548780 | -1.327145 | 0.119084  | 0.628942  | 1.000      |
| 634 GOBP-REGULATION-OF-POSTSYNAPSE-ORGANIZATION       | GO-0009175    | 6    | -0.552741 | -1.330497 | 0.135417  | 0.626209  | 1.000      |
| 635 GOBP-CELL-MORPHOGENESIS-INVOLVED-IN-NEURON-DIF... | GO-0048667    | 22   | -0.381574 | -1.340243 | 0.136598  | 0.603951  | 1.000      |
| 636 GOBP-RESPONSE-TO-ALKALOID                         | GO-0043279    | 5    | -0.588087 | -1.347265 | 0.122388  | 0.590963  | 1.000      |
| 637 GOBP-REGULATION-OF-HORMONE-LEVELS                 | GO-0010817    | 12   | -0.461609 | -1.351869 | 0.118384  | 0.584170  | 1.000      |
| 638 GOBP-LONG-TERM-SYNAPTIC-DEPRESSION                | GO-0060292    | 5    | -0.586435 | -1.352537 | 0.125186  | 0.580058  | 1.000      |
| 639 GOBP-CHEMICAL-SYNAPTIC-TRANSMISSION-POSTSYNAPTIC  | GO-0009565    | 9    | -0.484702 | -1.352917 | 0.139130  | 0.594766  | 1.000      |
| 640 GOBP-CELL-MORPHOGENESIS-INVOLVED-IN-DIFFERENTI... | GO-0000904    | 22   | -0.381574 | -1.355580 | 0.120104  | 0.594086  | 1.000      |
| 641 GOBP-REGULATION-OF-SIGNALING-RECEPTOR-ACTIVITY    | GO-0010469    | 14   | -0.427688 | -1.356903 | 0.132597  | 0.597431  | 1.000      |
| 642 GOBP-POSITIVE-REGULATION-OF-SYNAPTIC-TRANSMISSION | GO-0050806    | 15   | -0.426335 | -1.357025 | 0.131649  | 0.604332  | 1.000      |



Continuation of Table S5

|     | NAME                                               | ID            | SIZE | ES        | NES       | NOM.p.val | FDR.q.val | FWER.p.val |
|-----|----------------------------------------------------|---------------|------|-----------|-----------|-----------|-----------|------------|
| 643 | GOBP-PEPTIDE-SECRETION                             | GO-0002790    | 9    | -0.498935 | -1.362063 | 0.134307  | 0.596917  | 1.000      |
| 644 | REACTOME.MAPK.FAMILY.SIGNALING.CASCADES            | R-RNO-5683057 | 12   | -0.457009 | -1.364161 | 0.122392  | 0.597401  | 1.000      |
| 645 | GOBP-REGULATION.OF.METAL.ION.TRANSPORT             | GO-0010959    | 6    | -0.560813 | -1.364759 | 0.118280  | 0.602935  | 1.000      |
| 646 | GOBP-PROTEIN.COMPLEX.OLIGOMERIZATION               | GO-0051259    | 7    | -0.529892 | -1.365265 | 0.113235  | 0.608957  | 1.000      |
| 647 | REACTOME.NEURXINS.AND.NEUROLIGINS                  | R-RNO-6794361 | 9    | -0.482228 | -1.366907 | 0.129080  | 0.611609  | 1.000      |
| 648 | GOBP-REGULATION.OF.HORMONE.SECRETION               | GO-0046883    | 8    | -0.511802 | -1.372776 | 0.114202  | 0.601206  | 1.000      |
| 649 | GOBP-SYNAPTIC.TRANSMISSION.GLUTAMATERGIC           | GO-0035249    | 13   | -0.443800 | -1.370257 | 0.124823  | 0.598654  | 1.000      |
| 650 | GOBP-SENSORY.PERCEPTION.OF.PAIN                    | GO-0019233    | 5    | -0.614458 | -1.396832 | 0.087719  | 0.545051  | 1.000      |
| 651 | GOBP-REGULATION.OF.NEUROTRANSMITTER.LEVELS         | GO-0001505    | 7    | -0.555556 | -1.396885 | 0.097451  | 0.552283  | 1.000      |
| 652 | GOBP-POSITIVE.REGULATION.OF.SECRETION              | GO-0051047    | 6    | -0.574755 | -1.403132 | 0.090504  | 0.541878  | 1.000      |
| 653 | GOBP-NEUROTRANSMITTER.SECRETION                    | GO-0007269    | 6    | -0.578100 | -1.406550 | 0.098009  | 0.539330  | 1.000      |
| 654 | GOBP-INSULIN.SECRETION                             | GO-0030073    | 7    | -0.547623 | -1.409727 | 0.086257  | 0.537210  | 1.000      |
| 655 | GOBP-PEPTIDE.HORMONE.SECRETION                     | GO-0030072    | 7    | -0.547623 | -1.411287 | 0.098820  | 0.540121  | 1.000      |
| 656 | GOBP-CELL.CYCLE.PROCESS                            | GO-0022402    | 11   | -0.466999 | -1.411327 | 0.090129  | 0.547817  | 1.000      |
| 657 | GOBP-DENDRITE.DEVELOPMENT                          | GO-0016358    | 10   | -0.497937 | -1.412033 | 0.102011  | 0.553785  | 1.000      |
| 658 | GOBP-VESSICLE.MEDIATED.TRANSPORT.IN.SYNAPSE        | GO-0099003    | 5    | -0.561300 | -1.427367 | 0.092486  | 0.529765  | 1.000      |
| 659 | GOBP-MULTICELLULAR.ORGANISMAL.RESPONSE.TO.STRESS   | GO-0035555    | 7    | -0.635554 | -1.427392 | 0.075806  | 0.524852  | 1.000      |
| 660 | GOBP-NEUROTRANSMITTER.TRANSPORT                    | GO-0006836    | 7    | -0.555556 | -1.430385 | 0.077827  | 0.524476  | 1.000      |
| 661 | GOBP-G.PROTEIN.COUPLED.RECEPTOR.SIGNALING.PATHWAY  | GO-0007186    | 18   | -0.431676 | -1.440458 | 0.093915  | 0.503061  | 1.000      |
| 662 | REACTOME.NEGATIVE.REGULATION.OF.NMDA.RECEPTOR....  | R-HSA-9617324 | 8    | -0.550000 | -1.443245 | 0.070225  | 0.503757  | 1.000      |
| 663 | GOBP-ESTABLISHMENT.OF.PROTEIN.LOCALIZATION         | GO-0045184    | 17   | -0.436434 | -1.447617 | 0.081944  | 0.500468  | 1.000      |
| 664 | GOBP-ENDOCYTOSIS                                   | GO-0006897    | 8    | -0.539662 | -1.449498 | 0.072180  | 0.503044  | 1.000      |
| 665 | GOBP-LONG-TERM.SYNAPTIC.POTENTIATION               | GO-0060291    | 12   | -0.488332 | -1.453689 | 0.087500  | 0.499265  | 1.000      |
| 666 | GOBP-REGULATION.OF.SYNAPTIC.PLASTICITY             | GO-0048167    | 21   | -0.409889 | -1.457786 | 0.077720  | 0.495812  | 1.000      |
| 667 | GOBP-SECRETION                                     | GO-0046903    | 24   | -0.406812 | -1.460529 | 0.072258  | 0.496319  | 1.000      |
| 668 | REACTOME.ASSEMBLY.AND.CELL.SURFACE.PRESENTATIO.... | R-RNO-9609736 | 8    | -0.550000 | -1.465975 | 0.065502  | 0.489039  | 1.000      |
| 669 | GOBP-REGULATION.OF.CATION-TRANSMEMBRANE.TRANSPORT  | GO-1904062    | 16   | -0.450802 | -1.467663 | 0.073041  | 0.492839  | 1.000      |
| 670 | GOBP-ADENYLATE.CYCLASE.MODULATING-G.PROTEIN.CO...  | GO-0007188    | 11   | -0.502115 | -1.474389 | 0.085795  | 0.482657  | 1.000      |
| 671 | GOBP-POSITIVE.REGULATION.OF.ENDOTHELIAL.CELL.P...  | GO-0001938    | 6    | -0.609604 | -1.475996 | 0.060278  | 0.486982  | 1.000      |
| 672 | REACTOME.RAS.ACTIVATION.UPON.CA2.INFLUX.THROUGH... | R-HSA-442982  | 6    | -0.621951 | -1.490594 | 0.060993  | 0.454215  | 1.000      |
| 673 | GOBP-REGULATION.OF.SECRETION                       | GO-0051046    | 14   | -0.478993 | -1.496572 | 0.055556  | 0.446908  | 1.000      |
| 674 | GOBP-REGULATION.OF.ION.TRANSPORT                   | GO-0043269    | 36   | -0.385777 | -1.508194 | 0.071960  | 0.424216  | 1.000      |
| 675 | GOBP-CELL.SURFACE.RECEPTOR.SIGNALING.PATHWAY.I...  | GO-1905114    | 15   | -0.484886 | -1.510771 | 0.081200  | 0.426012  | 1.000      |
| 676 | GOBP-REGULATION.OF.NEUROTRANSMITTER.RECEPTOR-A...  | GO-0099601    | 13   | -0.498644 | -1.512563 | 0.044568  | 0.430169  | 1.000      |
| 677 | GOBP-HORMONE.TRANSPORT                             | GO-0009914    | 9    | -0.553517 | -1.515678 | 0.044577  | 0.438114  | 1.000      |
| 678 | GOBP-DENDRITE.MORPHOGENESIS                        | GO-0048813    | 7    | -0.590681 | -1.516216 | 0.044577  | 0.438114  | 1.000      |
| 679 | GOBP-REGULATION.OF.MEMBRANE.POTENTIAL              | GO-0042391    | 17   | -0.472290 | -1.526963 | 0.042216  | 0.418871  | 1.000      |
| 680 | GOBP-IONOTROPIC.GLUTAMATE.RECEPTOR.SIGNALING.P...  | GO-0035235    | 9    | -0.559075 | -1.530844 | 0.039187  | 0.417844  | 1.000      |
| 681 | GOBP-CELLULAR.HOMEOSTASIS                          | GO-0019725    | 18   | -0.461519 | -1.539590 | 0.045392  | 0.403882  | 1.000      |
| 682 | REACTOME.SYNAPTIC.ADHESION.LIKE.MOLECULES          | R-RNO-8849932 | 9    | -0.561187 | -1.549487 | 0.042433  | 0.386947  | 1.000      |
| 683 | GOBP-ION.HOMEOSTASIS                               | GO-0050801    | 16   | -0.474224 | -1.568573 | 0.039630  | 0.348626  | 1.000      |
| 684 | GOBP-CALCIUM.ION.TRANSPORT                         | GO-0006816    | 11   | -0.539376 | -1.581617 | 0.030683  | 0.326564  | 1.000      |
| 685 | GOBP-RECEPTOR.INTERNALIZATION                      | GO-0031623    | 5    | -0.701972 | -1.584845 | 0.030792  | 0.327658  | 1.000      |

Continuation of Table S5

| NAME | ID                                                            | SIZE | ES        | NES       | NOM.p.val | FDR.q.val | FWER.p.val |
|------|---------------------------------------------------------------|------|-----------|-----------|-----------|-----------|------------|
| 686  | GOBP-METAL-ION-TRANSPORT                                      | 11   | -0.539376 | -1.586899 | 0.037143  | 0.331651  | 1.000      |
| 687  | REACTOME-DAG-AND-IP3-SIGNALING                                | 8    | -0.596431 | -1.592211 | 0.030435  | 0.327938  | 1.000      |
| 688  | GOBP-CATION-TRANSMEMBRANE-TRANSPORT                           | 18   | -0.475133 | -1.596057 | 0.035620  | 0.327784  | 1.000      |
| 689  | REACTOME-PROTEIN-PROTEIN-INTERACTIONS-AT-SYNAPSES             | 12   | -0.530810 | -1.599467 | 0.032967  | 0.329218  | 1.000      |
| 690  | GOBP-REGULATION-OF-CATION-CHANNEL-ACTIVITY                    | 14   | -0.505156 | -1.602820 | 0.025572  | 0.330627  | 1.000      |
| 691  | GOBP-DIVALENT-INORGANIC-CATION-HOMEOSTASIS                    | 13   | -0.523379 | -1.604957 | 0.031208  | 0.335585  | 1.000      |
| 692  | GOBP-RECEPTOR-MEDIATED-ENDOCYTOSIS                            | 6    | -0.678741 | -1.616791 | 0.018154  | 0.318780  | 1.000      |
| 693  | GOBP-RECEPTOR-METABOLIC-PROCESS                               | 5    | -0.701972 | -1.624230 | 0.022157  | 0.312061  | 1.000      |
| 694  | GOBP-REGULATION-OF-TRANS-SYNAPTIC-SIGNALING                   | 40   | -0.406844 | -1.624587 | 0.019084  | 0.321569  | 1.000      |
| 695  | REACTOME-LONG-TERM-POTENTIATION                               | 10   | -0.574014 | -1.626804 | 0.031944  | 0.327191  | 1.000      |
| 696  | GOBP-REGULATION-OF-CYTOSOLIC-CALCIUM-ION-CONCENTRATION        | 13   | -0.523379 | -1.627263 | 0.030769  | 0.337165  | 1.000      |
| 697  | GOBP-REGULATION-OF-TRANSPORT                                  | 44   | -0.411581 | -1.636704 | 0.018564  | 0.326304  | 1.000      |
| 698  | GOBP-METAL-ION-HOMEOSTASIS                                    | 14   | -0.510986 | -1.641666 | 0.025572  | 0.326857  | 1.000      |
| 699  | GOBP-REGULATION-OF-POSTSYNAPTIC-MEMBRANE-POTENTIAL            | 14   | -0.521047 | -1.648322 | 0.018031  | 0.323010  | 1.000      |
| 700  | GOBP-TAXIS                                                    | 14   | -0.530904 | -1.664598 | 0.023546  | 0.298835  | 1.000      |
| 701  | REACTOME-CA-DEPENDENT-EVENTS                                  | 8    | -0.629874 | -1.707873 | 0.011396  | 0.223236  | 0.999      |
| 702  | GOBP-CELLULAR-ION-HOMEOSTASIS                                 | 14   | -0.540987 | -1.708884 | 0.009550  | 0.231082  | 0.999      |
| 703  | REACTOME-CREB1-PHOSPHORYLATION-THROUGH-NMDA-RECEPTOR          | 8    | -0.637500 | -1.715217 | 0.014124  | 0.229466  | 0.999      |
| 704  | GOBP-SENSORY PERCEPTION                                       | 9    | -0.645570 | -1.746304 | 0.011765  | 0.188347  | 0.996      |
| 705  | REACTOME-TRANSCRIPTIONAL-REGULATION-BY-MECP2                  | 7    | -0.694299 | -1.751326 | 0.007474  | 0.190076  | 0.996      |
| 706  | REACTOME-OPIOID-SIGNALING                                     | 12   | -0.581809 | -1.752075 | 0.008658  | 0.198705  | 0.996      |
| 707  | REACTOME-G-PROTEIN-MEDIATED-EVENTS                            | 9    | -0.647307 | -1.757173 | 0.004478  | 0.200199  | 0.993      |
| 708  | GOBP-SIGNAL-RELEASE                                           | 14   | -0.564258 | -1.782423 | 0.004213  | 0.171940  | 0.975      |
| 709  | GOBP-REGULATION-OF-NMDA-RECEPTOR-ACTIVITY                     | 10   | -0.632363 | -1.791026 | 0.011577  | 0.169973  | 0.969      |
| 710  | REACTOME-INTRACELLULAR-SIGNALING-BY-SECOND-MESSENGERS         | 15   | -0.555499 | -1.805708 | 0.006739  | 0.160351  | 0.952      |
| 711  | REACTOME-TRAFFICKING-OF-GLUR2-CONTAINING-AMPA-RECEPTORS       | 8    | -0.675187 | -1.810510 | 0.005970  | 0.165983  | 0.946      |
| 712  | GOBP-CATION-TRANSPORT                                         | 25   | -0.499575 | -1.810595 | 0.005249  | 0.178624  | 0.946      |
| 713  | GOBP-PROTEIN-CONTAINING-COMPLEX-SUBUNIT-ORGANIZATION          | 15   | -0.558366 | -1.812063 | 0.006775  | 0.191245  | 0.945      |
| 714  | GOBP-GLUTAMATE-RECEPTOR-SIGNALING-PATHWAY                     | 17   | -0.544366 | -1.819266 | 0.002677  | 0.195190  | 0.931      |
| 715  | REACTOME-UNBLOCKING-OF-NMDA-RECEPTORS-GLUTAMATE               | 12   | -0.603834 | -1.824378 | 0.007022  | 0.203406  | 0.924      |
| 716  | REACTOME-SIGNALING-BY-GPCR                                    | 22   | -0.517946 | -1.829147 | 0.006502  | 0.215499  | 0.919      |
| 717  | GOBP-SYNAPTIC-SIGNALING                                       | 47   | -0.482112 | -1.862374 | 0.002436  | 0.175899  | 0.821      |
| 718  | REACTOME-ACTIVATION-OF-NMDA-RECEPTORS-AND-POSTSYNAPTIC-EVENTS | 16   | -0.611111 | -1.969570 | 0.000000  | 0.066520  | 0.439      |
| 719  | REACTOME-TRAFFICKING-OF-AMPA-RECEPTORS                        | 11   | -0.693509 | -2.030433 | 0.000000  | 0.038970  | 0.245      |
| 720  | REACTOME-G-ALPHA-I-SIGNALING-EVENTS                           | 18   | -0.618072 | -2.109749 | 0.000000  | 0.016060  | 0.092      |
| 721  | GOBP-CELL-CELL-SIGNALING                                      | 56   | -0.562372 | -2.172927 | 0.000000  | 0.009460  | 0.044      |
| 722  | REACTOME-NEUROTRANSMITTER-RECEPTORS-AND-POSTSYNAPTIC-EVENTS   | 22   | -0.635336 | -2.238737 | 0.000000  | 0.006321  | 0.023      |
| 723  | REACTOME-TRANSMISSION-ACROSS-CHEMICAL-SYNAPSES                | 23   | -0.652775 | -2.334456 | 0.000000  | 0.002479  | 0.006      |
| 724  | REACTOME-NEURONAL-SYSTEM                                      | 26   | -0.634596 | -2.356828 | 0.000000  | 0.003253  | 0.004      |

End of Table

Supplementary Table S6: SC caudal segment early (8 DPL peak) profile GSEA results.

| Begin of Table S6 |                                                     |               |      |          |          |           |           |            |  |
|-------------------|-----------------------------------------------------|---------------|------|----------|----------|-----------|-----------|------------|--|
|                   | NAME                                                | ID            | SIZE | ES       | NES      | NOM.p.val | FDR.q.val | FWER.p.val |  |
| 0                 | REACTOME_INTERLEUKIN_4_AND_INTERLEUKIN_13_SIGNALING | R-RNO-6785807 | 8    | 0.850000 | 2.650963 | 0.000000  | 0.004133  | 0.003      |  |
| 1                 | GOBP_NEGATIVE_REGULATION_OF_PEPTIDASE_ACTIVITY      | GO-0010466    | 6    | 0.829268 | 2.291362 | 0.000000  | 0.058247  | 0.082      |  |
| 2                 | GOBP_NEGATIVE_REGULATION_OF_CYSSTEINE_TYPE_ENDO...  | GO-2000117    | 5    | 0.819277 | 2.102695 | 0.003257  | 0.159675  | 0.289      |  |
| 3                 | REACTOME_DEATH_RECEPTOR_SIGNALING                   | R-RNO-73887   | 5    | 0.843374 | 2.079119 | 0.003175  | 0.142639  | 0.329      |  |
| 4                 | GOBP_CYTOKINE_MEDIATED_SIGNALING_PATHWAY            | GO-0019221    | 16   | 0.477821 | 2.072472 | 0.006757  | 0.121649  | 0.346      |  |
| 5                 | GOBP_NEGATIVE_REGULATION_OF_PROTEOLYSIS             | GO-0045861    | 8    | 0.633652 | 2.050440 | 0.009132  | 0.120438  | 0.397      |  |
| 6                 | GOBP_OSTEOLAST_DIFFERENTIATION                      | GO-0001649    | 5    | 0.798331 | 1.999637 | 0.013158  | 0.140692  | 0.502      |  |
| 7                 | GOBP_NEGATIVE_REGULATION_OF_CELL_POPULATION_PR...   | GO-0008285    | 9    | 0.584956 | 1.952865 | 0.018605  | 0.163842  | 0.612      |  |
| 8                 | REACTOME_SIGNALING_BY_INTERLEUKINS                  | R-RNO-449147  | 15   | 0.475514 | 1.947926 | 0.000000  | 0.148248  | 0.621      |  |
| 9                 | REACTOME_TRANSCRIPTIONAL_REGULATION_OF_WHITE_A...   | R-RNO-381340  | 6    | 0.709519 | 1.937768 | 0.003745  | 0.141376  | 0.645      |  |
| 10                | GOBP_POSITIVE_REGULATION_OF_SMOOTH_MUSCLE_CELL...   | GO-0048661    | 5    | 0.734940 | 1.884392 | 0.006431  | 0.168348  | 0.737      |  |
| 11                | GOBP_REGULATION_OF_ANION_TRANSMEMBRANE_TRANSPORT    | GO-1903959    | 5    | 0.722892 | 1.834365 | 0.014134  | 0.201620  | 0.827      |  |
| 12                | GOBP_MAINTENANCE_OF_LOCATION                        | GO-0051235    | 7    | 0.604938 | 1.780696 | 0.019084  | 0.243920  | 0.901      |  |
| 13                | GOBP_RESPONSE_TO_CYTOKINE                           | GO-0034097    | 23   | 0.357711 | 1.722216 | 0.027027  | 0.307254  | 0.952      |  |
| 14                | GOBP_NEGATIVE_REGULATION_OF_MOLECULAR_FUNCTION      | GO-0044092    | 24   | 0.339218 | 1.686259 | 0.015267  | 0.348070  | 0.973      |  |
| 15                | GOBP_APOPTOTIC_SIGNALING_PATHWAY                    | GO-0097190    | 15   | 0.410959 | 1.684289 | 0.011696  | 0.329308  | 0.974      |  |
| 16                | GOBP_PROTEIN_KINASE_B_SIGNALING                     | GO-0043491    | 6    | 0.597551 | 1.662809 | 0.032967  | 0.347823  | 0.979      |  |
| 17                | GOBP_NEGATIVE_REGULATION_OF_APOPTOTIC_SIGNALIN...   | GO-2001234    | 7    | 0.543210 | 1.611342 | 0.034351  | 0.428348  | 0.997      |  |
| 18                | HALLMARK_APOPTOSIS                                  | M5902         | 6    | 0.577499 | 1.608824 | 0.033210  | 0.410407  | 0.998      |  |
| 19                | GOBP_MEMBRANE_PROTEIN_PROTEOLYSIS                   | GO-0033619    | 6    | 0.575726 | 1.577970 | 0.053957  | 0.451800  | 0.998      |  |
| 20                | GOBP_NEGATIVE_REGULATION_OF_HYDROLASE_ACTIVITY      | GO-0051346    | 11   | 0.436062 | 1.573022 | 0.053097  | 0.441651  | 0.998      |  |
| 21                | GOBP_REGULATION_OF_APOPTOTIC_SIGNALING_PATHWAY      | GO-2001233    | 10   | 0.448718 | 1.558977 | 0.025974  | 0.450405  | 0.999      |  |
| 22                | GOBP_CARBOHYDRATE_METABOLIC_PROCESS                 | GO-0005975    | 9    | 0.455696 | 1.549957 | 0.047170  | 0.451299  | 1.000      |  |
| 23                | GOBP_REGULATION_OF_PROTEIN_BINDING                  | GO-0043393    | 7    | 0.518518 | 1.542498 | 0.074074  | 0.447695  | 1.000      |  |
| 24                | GOBP_LEUKOCYTE_CELL_CELL_ADHESION                   | GO-0007159    | 6    | 0.548780 | 1.538624 | 0.063433  | 0.436162  | 1.000      |  |
| 25                | REACTOME_CYTOKINE_SIGNALING_IN_IMMUNE_SYSTEM        | R-RNO-1280215 | 21   | 0.321845 | 1.531217 | 0.034014  | 0.434406  | 1.000      |  |
| 26                | GOBP_INTRINSIC_APOPTOTIC_SIGNALING_PATHWAY          | GO-0097193    | 5    | 0.590361 | 1.529637 | 0.060284  | 0.421536  | 1.000      |  |
| 27                | GOBP_POSITIVE_REGULATION_OF_SMALL_MOLECULE_MET...   | GO-0062013    | 5    | 0.590361 | 1.528533 | 0.050167  | 0.408780  | 1.000      |  |
| 28                | GOBP_NEGATIVE_REGULATION_OF_RESPONSE_TO_EXTERN...   | GO-0032102    | 5    | 0.598862 | 1.505771 | 0.062718  | 0.439577  | 1.000      |  |
| 29                | GOBP_ACTIN_FILAMENT_BASED_PROCESS                   | GO-0030029    | 7    | 0.493827 | 1.504634 | 0.077220  | 0.427695  | 1.000      |  |
| 30                | GOBP_RESPONSE_TO_UV                                 | GO-0009411    | 5    | 0.590361 | 1.500342 | 0.082143  | 0.421445  | 1.000      |  |
| 31                | GOBP_NEGATIVE_REGULATION_OF_MULTICELLULAR_ORGA...   | GO-0051241    | 15   | 0.357820 | 1.483136 | 0.061111  | 0.442787  | 1.000      |  |
| 32                | GOBP_NEGATIVE_REGULATION_OF_PROTEIN_METABOLIC...    | GO-0051248    | 20   | 0.304733 | 1.467683 | 0.054264  | 0.462201  | 1.000      |  |
| 33                | GOBP_NEGATIVE_REGULATION_OF_LOCOMOTION              | GO-0040013    | 5    | 0.583830 | 1.450100 | 0.081356  | 0.483046  | 1.000      |  |
| 34                | GOBP_POSITIVE_REGULATION_OF_GENE_EXPRESSION         | GO-0006954    | 16   | 0.324126 | 1.442255 | 0.055901  | 0.485561  | 1.000      |  |
| 35                | GOBP_INFLAMMATORY_RESPONSE                          | GO-0006954    | 12   | 0.379522 | 1.441211 | 0.060606  | 0.474136  | 1.000      |  |
| 36                | GOBP_PRLMIRNA_TRANSCRIPTION_BY_RNA_POLYMERASE_II    | GO-0061614    | 7    | 0.467470 | 1.439829 | 0.072202  | 0.464377  | 1.000      |  |
| 37                | GOBP_POSITIVE_REGULATION_OF_CELL_CELL_ADHESION      | GO-0022409    | 5    | 0.542169 | 1.425610 | 0.093023  | 0.484717  | 1.000      |  |
| 38                | GOBP_REGULATION_OF_DEFENSE_RESPONSE                 | GO-0031347    | 7    | 0.468013 | 1.424753 | 0.082645  | 0.473571  | 1.000      |  |
| 39                | GOBP_POSITIVE_REGULATION_OF_AXONOGENESIS            | GO-0050772    | 5    | 0.555503 | 1.421564 | 0.097902  | 0.468022  | 1.000      |  |
| 40                | GOBP_CELLULAR_RESPONSE_TO_EXTERNAL_STIMULUS         | GO-0071496    | 10   | 0.396947 | 1.410026 | 0.069149  | 0.479794  | 1.000      |  |

Continuation of Table S6

| NAME | ID                                                  | SIZE | ES       | NES      | NOM.p.val | FDR.q.val | FWER.p.val |
|------|-----------------------------------------------------|------|----------|----------|-----------|-----------|------------|
| 41   | GOBP-POSITIVE-REGULATION_OF_PRL-MIRNA-TRANSCRIPT... | 7    | 0.467450 | 1.409578 | 0.092593  | 0.469189  | 1.000      |
| 42   | GOBP-PROTEOLYSIS                                    | 17   | 0.331716 | 1.409049 | 0.076923  | 0.459111  | 1.000      |
| 43   | GOBP-POSITIVE-REGULATION_OF_LEUKOCYTE-CELL-CEL...   | 5    | 0.542169 | 1.406760 | 0.115523  | 0.452326  | 1.000      |
| 44   | GOBP-POSITIVE-REGULATION_OF_PHOSPHATIDYLINOSIT...   | 5    | 0.554217 | 1.403875 | 0.120275  | 0.448688  | 1.000      |
| 45   | GOBP-POSITIVE-REGULATION_OF_BINDING                 | 6    | 0.512195 | 1.388809 | 0.125000  | 0.472215  | 1.000      |
| 46   | GOBP-REGULATION_OF_INFLAMMATORY_RESPONSE            | 7    | 0.468013 | 1.387067 | 0.100746  | 0.465522  | 1.000      |
| 47   | GOBP-REGULATION_OF_BINDING                          | 11   | 0.390865 | 1.366613 | 0.095000  | 0.496693  | 1.000      |
| 48   | GOBP-REGULATION_OF_CELL-CELL-ADHESION               | 9    | 0.405063 | 1.357406 | 0.102564  | 0.506228  | 1.000      |
| 49   | GOBP-OSSIFICATION                                   | 9    | 0.401897 | 1.350846 | 0.120172  | 0.510587  | 1.000      |
| 50   | GOBP-CELLULAR-CARBOHYDRATE-METABOLIC-PROCESS        | 5    | 0.518072 | 1.349536 | 0.112281  | 0.503712  | 1.000      |
| 51   | GOBP-POSITIVE-REGULATION_OF_CYTOKINE-PRODUCTION     | 7    | 0.447422 | 1.346138 | 0.116379  | 0.501258  | 1.000      |
| 52   | GOBP-POSITIVE-REGULATION_OF_CELL-DIFFERENTIATION    | 27   | 0.257454 | 1.342514 | 0.095652  | 0.498908  | 1.000      |
| 53   | GOBP-REGULATION_OF-CARBOHYDRATE-METABOLIC-PROCESS   | 5    | 0.518072 | 1.342408 | 0.106618  | 0.490098  | 1.000      |
| 54   | GOBP-DEVELOPMENTAL-CELL-GROWTH                      | 5    | 0.530121 | 1.339137 | 0.121094  | 0.487526  | 1.000      |
| 55   | GOBP-REGULATION_OF-CARBOHYDRATE-BIOSYNTHETIC-P...   | 5    | 0.518072 | 1.337963 | 0.141379  | 0.481517  | 1.000      |
| 56   | GOBP-SMOOTH-MUSCLE-CELL-PROLIFERATION               | 5    | 0.487805 | 1.337529 | 0.112727  | 0.474146  | 1.000      |
| 57   | GOBP-GENERATION_OF-PRECURSOR-METABOLITES-AND-E...   | 5    | 0.518072 | 1.334865 | 0.127208  | 0.471398  | 1.000      |
| 58   | GOBP-NEGATIVE-REGULATION_OF-CELL-DEATH              | 22   | 0.266423 | 1.333492 | 0.098765  | 0.465792  | 1.000      |
| 59   | GOBP-MORPHOGENESIS_OF-AN-EPITHELIUM                 | 6    | 0.490067 | 1.330398 | 0.136842  | 0.463996  | 1.000      |
| 60   | GOBP-RESPONSE-TO-MOLECULE-OF-BACTERIAL-ORIGIN       | 13   | 0.333675 | 1.314412 | 0.139896  | 0.489334  | 1.000      |
| 61   | GOBP-EXTRINSIC-APOPTOTIC-SIGNALING-PATHWAY          | 7    | 0.432099 | 1.312685 | 0.150000  | 0.484675  | 1.000      |
| 62   | GOBP-CARBOHYDRATE-BIOSYNTHETIC-PROCESS              | 5    | 0.518072 | 1.310175 | 0.169935  | 0.482389  | 1.000      |
| 63   | GOBP-POLYSACCHARIDE-METABOLIC-PROCESS               | 5    | 0.518072 | 1.292294 | 0.153846  | 0.511206  | 1.000      |
| 64   | GOBP-RESPONSE-TO-BACTERIUM                          | 13   | 0.333675 | 1.285532 | 0.146739  | 0.517268  | 1.000      |
| 65   | GOBP-REGULATION_OF-FAT-CELL-DIFFERENTIATION         | 6    | 0.464218 | 1.285140 | 0.138182  | 0.510234  | 1.000      |
| 66   | GOBP-REGULATION_OF_CELL-DIFFERENTIATION             | 36   | 0.227301 | 1.265996 | 0.086957  | 0.543145  | 1.000      |
| 67   | GOBP-POSITIVE-REGULATION_OF_DEVELOPMENTAL-PROCESS   | 32   | 0.235071 | 1.263451 | 0.129032  | 0.540692  | 1.000      |
| 68   | REACTOME-SENESCENCE-ASSOCIATED-SECRETORY-PHENO...   | 6    | 0.453492 | 1.257207 | 0.198413  | 0.545614  | 1.000      |
| 69   | GOBP-TISSUE-MORPHOGENESIS                           | 7    | 0.419753 | 1.247029 | 0.172662  | 0.547414  | 1.000      |
| 70   | GOBP-REGULATION_OF-GTPASE-ACTIVITY                  | 5    | 0.481928 | 1.245655 | 0.194346  | 0.549151  | 1.000      |
| 71   | GOBP-GLUCOSE-METABOLIC-PROCESS                      | 6    | 0.439024 | 1.240985 | 0.172269  | 0.551771  | 1.000      |
| 72   | GOBP-POSITIVE-REGULATION_OF_DEFENSE-RESPONSE        | 5    | 0.488575 | 1.238543 | 0.200000  | 0.549066  | 1.000      |
| 73   | GOBP-MYELOID-CELL-DIFFERENTIATION                   | 13   | 0.300607 | 1.237936 | 0.149701  | 0.542896  | 1.000      |
| 74   | GOBP-PERIPHERAL-NERVOUS-SYSTEM-DEVELOPMENT          | 9    | 0.355801 | 1.224405 | 0.197368  | 0.564941  | 1.000      |
| 75   | GOBP-REGULATION_OF_VASCULAR-ASSOCIATED-SMOOTH...    | 5    | 0.481928 | 1.223218 | 0.185965  | 0.560542  | 1.000      |
| 76   | GOBP-SKIN-DEVELOPMENT                               | 5    | 0.491114 | 1.223002 | 0.212544  | 0.554107  | 1.000      |
| 77   | GOBP-NEGATIVE-REGULATION_OF_TRANSCRIPTION_BY-R...   | 10   | 0.343307 | 1.207723 | 0.188776  | 0.579909  | 1.000      |
| 78   | GOBP-MONOSACCHARIDE-METABOLIC-PROCESS               | 6    | 0.439024 | 1.203303 | 0.210526  | 0.578745  | 1.000      |
| 79   | GOBP-POSITIVE-REGULATION_OF_IMMUNE-RESPONSE         | 9    | 0.354107 | 1.200078 | 0.232068  | 0.582966  | 1.000      |
| 80   | GOBP-REGULATION_OF-DEVELOPMENTAL-GROWTH             | 9    | 0.352055 | 1.198242 | 0.247368  | 0.580520  | 1.000      |
| 81   | GOBP-CELLULAR-RESPONSE-TO-MOLECULE-OF-BACTERIA...   | 8    | 0.376145 | 1.195760 | 0.248927  | 0.577841  | 1.000      |
| 82   | GOBP-CELL-POPULATION-PROLIFERATION                  | 32   | 0.220748 | 1.190303 | 0.157895  | 0.581657  | 1.000      |

Continuation of Table S6

| NAME | ID                                                               | SIZE        | ES       | NES      | NOM.p.val | FDR.q.val | FWER.p.val |
|------|------------------------------------------------------------------|-------------|----------|----------|-----------|-----------|------------|
| 84   | GOBP-ACTIVATION_OF_IMMUNE_RESPONSE                               | 5           | 0.473733 | 1.186214 | 0.237354  | 0.586076  | 1.000      |
| 85   | GOBP-RESPONSE_TO_MECHANICAL_STIMULUS                             | 6           | 0.421899 | 1.180344 | 0.257143  | 0.593458  | 1.000      |
| 86   | HALLMARK-HYPOXIA                                                 | 5           | 0.464336 | 1.173914 | 0.239852  | 0.600206  | 1.000      |
| 87   | GOBP-REGULATION_OF_EXTRINSIC_APOPTOTIC_SIGNALING                 | 6           | 0.426829 | 1.166786 | 0.268000  | 0.609739  | 1.000      |
| 88   | GOBP-CELLULAR_RESPONSE_TO_BIOTIC_STIMULUS                        | 8           | 0.376411 | 1.161446 | 0.259574  | 0.614536  | 1.000      |
| 89   | GOBP-RAS_PROTEIN_SIGNAL_TRANSDUCTION                             | 5           | 0.463971 | 1.155653 | 0.278317  | 0.621031  | 1.000      |
| 90   | GOBP-TISSUE_HOMEOSTASIS                                          | 5           | 0.444430 | 1.154216 | 0.257840  | 0.618433  | 1.000      |
| 91   | GOBP-REGULATION_OF_LIPID_LOCALIZATION                            | 5           | 0.469880 | 1.150313 | 0.273927  | 0.621030  | 1.000      |
| 92   | GOBP-DEFENSE_RESPONSE_TO_OTHER_ORGANISM                          | 9           | 0.342538 | 1.144591 | 0.270642  | 0.626987  | 1.000      |
| 93   | GOBP-POSITIVE_REGULATION_OF_DEVELOPMENTAL_GROWTH                 | 8           | 0.360775 | 1.143424 | 0.273543  | 0.622916  | 1.000      |
| 94   | GOBP-POSITIVE_REGULATION_OF_BIOSYNTHETIC_PROCESS                 | 27          | 0.228326 | 1.140818 | 0.258064  | 0.622328  | 1.000      |
| 95   | GOBP-IMMUNE_SYSTEM_DEVELOPMENT                                   | 17          | 0.262523 | 1.140214 | 0.282209  | 0.617204  | 1.000      |
| 96   | HALLMARK-TNFA_SIGNALING_VIA_NFKB                                 | 14          | 0.278203 | 1.134372 | 0.240964  | 0.624429  | 1.000      |
| 97   | GOBP-CARBOHYDRATE_DERIVATIVE_METABOLIC_PROCESS                   | 8           | 0.355310 | 1.134310 | 0.284091  | 0.618086  | 1.000      |
| 98   | HALLMARK-ALLOGRAFT_REJECTION                                     | 7           | 0.376773 | 1.134252 | 0.259414  | 0.611968  | 1.000      |
| 99   | GOBP-FC_RECEPTOR_SIGNALING_PATHWAY                               | 8           | 0.355435 | 1.129107 | 0.278481  | 0.617619  | 1.000      |
| 100  | GOBP-REGULATION_OF_IMMUNE_RESPONSE                               | 12          | 0.295254 | 1.121226 | 0.254902  | 0.631100  | 1.000      |
| 101  | GOBP-NEGATIVE_REGULATION_OF_BINDING                              | 6           | 0.410171 | 1.120548 | 0.304833  | 0.626864  | 1.000      |
| 102  | REACTOME-ADAPTIVE_IMMUNE_SYSTEM                                  | 9           | 0.329114 | 1.118723 | 0.301653  | 0.624580  | 1.000      |
| 103  | GOBP-CELLULAR_RESPONSE_TO_ORGANIC_CYCLIC_COMPOUND                | 13          | 0.285754 | 1.118335 | 0.295000  | 0.619514  | 1.000      |
| 104  | GOBP-IMMUNE_RESPONSE_REGULATING_SIGNALING_PATHWAY                | GO-00071407 | 10       | 0.305326 | 1.102162  | 0.302326  | 0.643152   |
| 105  | GOBP-REGULATION_OF_CELL_ADHESION                                 | GO-00030155 | 13       | 0.280000 | 1.102162  | 0.308300  | 0.625656   |
| 106  | GOBP-CYTOKINE_PRODUCTION                                         | GO-0001816  | 10       | 0.312785 | 1.096172  | 0.305936  | 0.652902   |
| 107  | GOBP-REGULATION_OF_MULTICELLULAR_ORGANISMAL_DEVELOPMENT          | GO-2000026  | 31       | 0.202802 | 1.094705  | 0.246914  | 0.651199   |
| 108  | GOBP-POSITIVE_REGULATION_OF_NUCLEOBASE_CONTAINING                | GO-0045935  | 28       | 0.205451 | 1.082979  | 0.327586  | 0.670642   |
| 109  | GOBP-DEVELOPMENTAL_GROWTH                                        | GO-0048589  | 10       | 0.305326 | 1.075151  | 0.331707  | 0.683175   |
| 110  | GOBP-REGULATION_OF_EPITHELIAL_CELL_MIGRATION                     | GO-0010632  | 6        | 0.390244 | 1.074346  | 0.329710  | 0.678917   |
| 111  | GOBP-RESPONSE_TO_NUTRIENT                                        | GO-0007584  | 5        | 0.415962 | 1.068296  | 0.392593  | 0.686907   |
| 112  | GOBP-REGULATION_OF_ANATOMICAL_STRUCTURE_SIZE                     | GO-0090066  | 10       | 0.310759 | 1.067914  | 0.299517  | 0.681634   |
| 113  | GOBP-POSITIVE_REGULATION_OF_APOPTOTIC_SIGNALING                  | GO-2001235  | 5        | 0.421687 | 1.063617  | 0.389091  | 0.686629   |
| 114  | GOBP-REGULATION_OF_LYMPHOCYTE_ACTIVATION                         | GO-0051249  | 5        | 0.421687 | 1.060266  | 0.372694  | 0.689044   |
| 115  | GOBP-POSITIVE_REGULATION_OF_MULTICELLULAR_ORGANISMAL_DEVELOPMENT | GO-0051240  | 32       | 0.196700 | 1.055915  | 0.357143  | 0.693212   |
| 116  | GOBP-OSTEOCLAST_DIFFERENTIATION                                  | GO-0030316  | 6        | 0.375883 | 1.055669  | 0.356863  | 0.687825   |
| 117  | GOBP-POSITIVE_REGULATION_OF_GROWTH                               | GO-0045927  | 9        | 0.309418 | 1.052134  | 0.365546  | 0.690007   |
| 118  | GOBP-REGULATION_OF_NERVOUS_SYSTEM_DEVELOPMENT                    | GO-0051960  | 15       | 0.249200 | 1.044461  | 0.412587  | 0.701368   |
| 119  | GOBP-POSITIVE_REGULATION_OF_PEPTIDYL_SERINE_PHOSPHORYLATION      | GO-0033138  | 8        | 0.324908 | 1.041986  | 0.390438  | 0.700461   |
| 120  | GOBP-REGULATION_OF_PEPTIDYL_SERINE_PHOSPHORYLATION               | GO-0033135  | 8        | 0.324908 | 1.040885  | 0.420601  | 0.696859   |
| 121  | GOBP-CELLULAR_RESPONSE_TO_OXYGEN-CONTAINING_COMPOUND             | GO-1901701  | 29       | 0.199997 | 1.021361  | 0.387097  | 0.738433   |
| 122  | GOBP-REGULATION_OF_MUSCLE_SYSTEM_PROCESS                         | GO-0090257  | 8        | 0.325000 | 1.021225  | 0.415638  | 0.732814   |
| 123  | GOBP-GLAND_DEVELOPMENT                                           | GO-0048732  | 7        | 0.334236 | 1.007483  | 0.422925  | 0.758781   |
| 124  | GOBP-MONONUCLEAR_CELL_DIFFERENTIATION                            | GO-1903131  | 7        | 0.339976 | 1.005551  | 0.451883  | 0.757515   |
| 125  | GOBP-INOSITOL_LIPID-MEDIATED_SIGNALING                           | GO-0048017  | 8        | 0.316406 | 1.002518  | 0.449393  | 0.759812   |
| 126  | GOBP-REGULATION_OF_NEURON_DIFFERENTIATION                        | GO-0045664  | 5        | 0.392180 | 1.000727  | 0.425249  | 0.757867   |

Continuation of Table S6

| NAME | ID                                                 | SIZE | ES       | NES      | NOM.p.val | FDR.q.val | FWER.p.val |
|------|----------------------------------------------------|------|----------|----------|-----------|-----------|------------|
| 127  | GOBP-REGULATION-OF-PEPTIDYL-TYROSINE-PHOSPHORY...  | 9    | 0.299408 | 0.998255 | 0.443925  | 0.758750  | 1.000      |
| 128  | GOBP-ORGAN-GROWTH                                  | 5    | 0.381101 | 0.997915 | 0.474820  | 0.753571  | 1.000      |
| 129  | GOBP-RESPONSE-TO-ENDOGENOUS-STIMULUS               | 34   | 0.183113 | 0.994952 | 0.456522  | 0.754448  | 1.000      |
| 130  | GOBP-CELLULAR-RESPONSE-TO-EXTRACELLULAR-STIMULUS   | 8    | 0.310091 | 0.993695 | 0.453782  | 0.751206  | 1.000      |
| 131  | GOBP-POSITIVE-REGULATION-OF-CELL-GROWTH            | 6    | 0.356985 | 0.991770 | 0.423077  | 0.749596  | 1.000      |
| 132  | GOBP-NEGATIVE-REGULATION-OF-GENE-EXPRESSION        | 11   | 0.272727 | 0.990087 | 0.446078  | 0.748115  | 1.000      |
| 133  | GOBP-REGULATION-OF-ENDOTHELIAL-CELL-MIGRATION      | 5    | 0.385542 | 0.989230 | 0.474747  | 0.744613  | 1.000      |
| 134  | GOBP-REGULATION-OF-MITOTIC-CELL-CYCLE              | 5    | 0.385542 | 0.988099 | 0.469595  | 0.741881  | 1.000      |
| 135  | GOBP-FAT-CELL-DIFFERENTIATION                      | 9    | 0.295664 | 0.986821 | 0.430380  | 0.738878  | 1.000      |
| 136  | GOBP-REGULATION-OF-NEUROGENESIS                    | 14   | 0.245709 | 0.983176 | 0.480874  | 0.740571  | 1.000      |
| 137  | REACTOME-INFECTIOUS-DISEASE                        | 12   | 0.263626 | 0.979187 | 0.492754  | 0.743918  | 1.000      |
| 138  | GOBP-REGULATION-OF-CELL-DEVELOPMENT                | 15   | 0.239794 | 0.974873 | 0.479769  | 0.747772  | 1.000      |
| 139  | GOBP-TISSUE-MIGRATION                              | 9    | 0.291139 | 0.973249 | 0.438819  | 0.746696  | 1.000      |
| 140  | GOBP-CHROMATIN-ORGANIZATION                        | 5    | 0.385542 | 0.969988 | 0.468966  | 0.748869  | 1.000      |
| 141  | GOBP-POSITIVE-REGULATION-OF-EPIITHELIAL-CELL-MI... | 5    | 0.385542 | 0.969252 | 0.477352  | 0.745507  | 1.000      |
| 142  | GOBP-POSITIVE-REGULATION-OF-TRANSCRIPTION-BY-R...  | 24   | 0.203391 | 0.965913 | 0.504000  | 0.748150  | 1.000      |
| 143  | GOBP-MUSCLE-CELL-PROLIFERATION                     | 8    | 0.303707 | 0.963409 | 0.483254  | 0.748472  | 1.000      |
| 144  | GOBP-T-CELL-ACTIVATION                             | 8    | 0.309911 | 0.961854 | 0.497817  | 0.746658  | 1.000      |
| 145  | GOBP-REGULATION-OF-ORGAN-GROWTH                    | 5    | 0.381101 | 0.953776 | 0.489796  | 0.759051  | 1.000      |
| 146  | GOBP-PROTEIN-DEPHOSPHORYLATION                     | 7    | 0.320988 | 0.950271 | 0.488722  | 0.761234  | 1.000      |
| 147  | GOBP-DEPHOSPHORYLATION                             | 7    | 0.320988 | 0.949025 | 0.502058  | 0.758605  | 1.000      |
| 148  | GOBP-POSITIVE-REGULATION-OF-CELL-DEVELOPMENT       | 12   | 0.245595 | 0.944240 | 0.479592  | 0.764618  | 1.000      |
| 149  | GOBP-RESPONSE-TO-INTERLEUKIN-1                     | 5    | 0.368060 | 0.942450 | 0.526882  | 0.763726  | 1.000      |
| 150  | GOBP-REGULATION-OF-CELL-SIZE                       | 5    | 0.369922 | 0.937617 | 0.503472  | 0.768768  | 1.000      |
| 151  | GOBP-NEGATIVE-REGULATION-OF-CATALYTIC-ACTIVITY     | 17   | 0.222880 | 0.937520 | 0.595376  | 0.763879  | 1.000      |
| 152  | GOBP-POSITIVE-REGULATION-OF-CELL-ADHESION          | 7    | 0.320988 | 0.936632 | 0.520161  | 0.760919  | 1.000      |
| 153  | REACTOME-INNATE-IMMUNE-SYSTEM                      | 16   | 0.217631 | 0.936451 | 0.564706  | 0.756687  | 1.000      |
| 154  | GOBP-POSITIVE-REGULATION-OF-NERVOUS-SYSTEM.DEV...  | 12   | 0.245595 | 0.923073 | 0.572770  | 0.780449  | 1.000      |
| 155  | GOBP-BLOOD-VESSEL-ENDOTHELIAL-CELL-MIGRATION       | 8    | 0.287500 | 0.918606 | 0.557377  | 0.784430  | 1.000      |
| 156  | GOBP-ENDOTHELIAL-CELL-MIGRATION                    | 8    | 0.287500 | 0.917486 | 0.533613  | 0.781576  | 1.000      |
| 157  | GOBP-CELL-GROWTH                                   | 10   | 0.269231 | 0.916657 | 0.555556  | 0.778443  | 1.000      |
| 158  | GOBP-POSITIVE-REGULATION-OF-NEUROGENESIS           | 12   | 0.245595 | 0.916609 | 0.583756  | 0.773714  | 1.000      |
| 159  | HALLMARK-KRAS-SIGNALING-UP                         | 6    | 0.330454 | 0.916605 | 0.549296  | 0.768887  | 1.000      |
| 160  | GOBP-ENDOTHELIAL-CELL-PROLIFERATION                | 8    | 0.287500 | 0.906630 | 0.611607  | 0.784658  | 1.000      |
| 161  | GOBP-REGULATION-OF-GROWTH                          | 13   | 0.233078 | 0.904369 | 0.573770  | 0.784084  | 1.000      |
| 162  | GOBP-POSITIVE-REGULATION-OF-CELL-POPULATION.PR...  | 21   | 0.193309 | 0.902359 | 0.580645  | 0.783720  | 1.000      |
| 163  | GOBP-LEUKOCYTE-DIFFERENTIATION                     | 15   | 0.219425 | 0.896418 | 0.618182  | 0.790412  | 1.000      |
| 164  | GOBP-RESPONSE-TO-ORGANIC-CYCLIC-COMPOUND           | 20   | 0.193309 | 0.893317 | 0.666667  | 0.791992  | 1.000      |
| 165  | GOBP-NEGATIVE-REGULATION-OF-CELL-DEVELOPMENT       | 6    | 0.320491 | 0.880101 | 0.580000  | 0.814249  | 1.000      |
| 166  | GOBP-REGULATION-OF-IMMUNE-SYSTEM-PROCESS           | 21   | 0.182149 | 0.877930 | 0.632000  | 0.814197  | 1.000      |
| 167  | GOBP-POSITIVE-REGULATION-OF-PEPTIDYL-TYROSINE....  | 8    | 0.282237 | 0.876676 | 0.621622  | 0.811832  | 1.000      |
| 168  | GOBP-NEGATIVE-REGULATION-OF-NERVOUS-SYSTEM.DEV...  | 5    | 0.333754 | 0.873836 | 0.620253  | 0.812393  | 1.000      |
| 169  | GOBP-NEGATIVE-REGULATION-OF-NUCLEOBASE-CONTAIN...  | 13   | 0.213333 | 0.866599 | 0.679426  | 0.821534  | 1.000      |

Continuation of Table S6

| NAME | ID                                                | SIZE | ES       | NES      | NOM.p.val | FDR.q.val | FWER.p.val |
|------|---------------------------------------------------|------|----------|----------|-----------|-----------|------------|
| 170  | GOBP-INNATE-IMMUNE-RESPONSE                       | 7    | 0.289150 | 0.863453 | 0.600000  | 0.823158  | 1.000      |
| 171  | GOBP-CELL-CELL-JUNCTION-ASSEMBLY                  | 5    | 0.352095 | 0.859633 | 0.631399  | 0.825969  | 1.000      |
| 172  | GOBP-REGULATION-OF-DNA-BINDING-TRANSCRIPTION-F... | 16   | 0.198823 | 0.851069 | 0.684211  | 0.838673  | 1.000      |
| 173  | GOBP-POSITIVE-REGULATION-OF-IMMUNE-SYSTEM-PROCESS | 18   | 0.189856 | 0.850890 | 0.685714  | 0.834365  | 1.000      |
| 174  | GOBP-REGULATION-OF-CELLULAR-COMPONENT-SIZE        | 7    | 0.282032 | 0.848047 | 0.688000  | 0.834641  | 1.000      |
| 175  | GOBP-EPITHELIAL-CELL-PROLIFERATION                | 12   | 0.215762 | 0.847740 | 0.682796  | 0.830333  | 1.000      |
| 176  | GOBP-GROWTH                                       | 14   | 0.211635 | 0.846630 | 0.703911  | 0.827850  | 1.000      |
| 177  | GOBP-NEGATIVE-REGULATION-OF-BIOSYNTHETIC-PROCESS  | 13   | 0.213914 | 0.846260 | 0.661290  | 0.823851  | 1.000      |
| 178  | GOBP-IN-UTERO-EMBRYONIC-DEVELOPMENT               | 8    | 0.268618 | 0.845298 | 0.669683  | 0.820888  | 1.000      |
| 179  | GOBP-MYELOID-LEUKOCYTE-DIFFERENTIATION            | 11   | 0.222245 | 0.844695 | 0.676056  | 0.817766  | 1.000      |
| 180  | GOBP-REGULATION-OF-MYELOID-CELL-DIFFERENTIATION   | 9    | 0.234587 | 0.837252 | 0.707424  | 0.825862  | 1.000      |
| 181  | GOBP-PEPTIDE-METABOLIC-PROCESS                    | 11   | 0.223825 | 0.820233 | 0.730000  | 0.853486  | 1.000      |
| 182  | GOBP-NEUROTROPHIN-TRK-RECEPTOR-SIGNALING-PATHWAY  | 6    | 0.287919 | 0.811654 | 0.665427  | 0.863558  | 1.000      |
| 183  | GOBP-POSITIVE-REGULATION-OF-ANION-TRANSPORT       | 9    | 0.243544 | 0.810648 | 0.722222  | 0.860938  | 1.000      |
| 184  | GOBP-NEUROTROPHIN-SIGNALING-PATHWAY               | 6    | 0.287919 | 0.809990 | 0.691700  | 0.857589  | 1.000      |
| 185  | GOBP-REGULATION-OF-HEMOPOIESIS                    | 10   | 0.222658 | 0.793840 | 0.781659  | 0.880720  | 1.000      |
| 186  | GOBP-MUSCLE-CONTRACTION                           | 5    | 0.301205 | 0.784896 | 0.752508  | 0.891388  | 1.000      |
| 187  | GOBP-CELLULAR-GLUCOSE-HOMEOSTASIS                 | 5    | 0.313253 | 0.781790 | 0.768212  | 0.891743  | 1.000      |
| 188  | GOBP-NEURON-APOPTOTIC-PROCESS                     | 12   | 0.202582 | 0.777287 | 0.828125  | 0.894494  | 1.000      |
| 189  | GOBP-INTRACELLULAR-RECEPTOR-SIGNALING-PATHWAY     | 5    | 0.297755 | 0.751532 | 0.767361  | 0.932543  | 1.000      |
| 190  | GOBP-SPROUTING-ANGIOGENESIS                       | 5    | 0.297211 | 0.751060 | 0.781250  | 0.925888  | 1.000      |
| 191  | GOBP-POSITIVE-REGULATION-OF-TRANSMEMBRANE-TRAN... | 7    | 0.254916 | 0.749835 | 0.776515  | 0.925597  | 1.000      |
| 192  | GOBP-REGULATION-OF-OSTEOCLAST-DIFFERENTIATION     | 5    | 0.291396 | 0.748408 | 0.762590  | 0.922923  | 1.000      |
| 193  | GOBP-NEGATIVE-REGULATION-OF-RESPONSE-TO-STIMULUS  | 16   | 0.173441 | 0.743742 | 0.856287  | 0.924483  | 1.000      |
| 194  | GOBP-CELLULAR-AMIDE-METABOLIC-PROCESS             | 12   | 0.194177 | 0.741730 | 0.866337  | 0.922841  | 1.000      |
| 195  | GOBP-CELLULAR-RESPONSE-TO-ABIOTIC-STIMULUS        | 7    | 0.240240 | 0.735904 | 0.827586  | 0.926570  | 1.000      |
| 196  | GOBP-CELLULAR-RESPONSE-TO-LIPID                   | 15   | 0.178087 | 0.734421 | 0.905556  | 0.924255  | 1.000      |
| 197  | GOBP-HOMEOSTASIS-OF-NUMBER-OF-CELLS               | 5    | 0.294654 | 0.725792 | 0.786260  | 0.932461  | 1.000      |
| 198  | GOBP-PROTEIN-AUTOPHOSPHORYLATION                  | 5    | 0.277643 | 0.718271 | 0.843416  | 0.937942  | 1.000      |
| 199  | GOBP-RESPONSE-TO-TUMOR-NECROSIS-FACTOR            | 7    | 0.238818 | 0.710560 | 0.872587  | 0.943498  | 1.000      |
| 200  | GOBP-CELLULAR-COMPONENT-DISASSEMBLY               | 6    | 0.256098 | 0.705572 | 0.843972  | 0.945202  | 1.000      |
| 201  | REACTOME-HEMOSTASIS                               | 14   | 0.170135 | 0.696012 | 0.920455  | 0.953242  | 1.000      |
| 202  | GOBP-EMBRYO-DEVELOPMENT-ENDING-IN-BIRTH-OR-EGG... | 9    | 0.202628 | 0.687301 | 0.876068  | 0.958925  | 1.000      |
| 203  | GOBP-POSITIVE-REGULATION-OF-CELL-PROJECTION-OR... | 10   | 0.193454 | 0.685449 | 0.892523  | 0.956550  | 1.000      |
| 204  | GOBP-CYTOSKELETON-ORGANIZATION                    | 11   | 0.183404 | 0.683791 | 0.891892  | 0.953639  | 1.000      |
| 205  | GOBP-REGULATION-OF-LEUKOCYTE-DIFFERENTIATION      | 9    | 0.202532 | 0.677548 | 0.900000  | 0.956444  | 1.000      |
| 206  | GOBP-PROTEIN-MODIFICATION-BY-SMALL-PROTEIN-CON... | 7    | 0.222222 | 0.674722 | 0.896414  | 0.955160  | 1.000      |
| 207  | GOBP-POSITIVE-REGULATION-OF-DNA-BINDING-TRANSC... | 10   | 0.184408 | 0.671541 | 0.902703  | 0.954056  | 1.000      |
| 208  | GOBP-CELL-CELL-ADHESION                           | 14   | 0.172325 | 0.668169 | 0.937500  | 0.953535  | 1.000      |
| 209  | REACTOME-NGF-STIMULATED-TRANSCRIPTION             | 9    | 0.202562 | 0.664117 | 0.909091  | 0.953468  | 1.000      |
| 210  | GOBP-LYMPHOCYTE-ACTIVATION                        | 5    | 0.179889 | 0.658021 | 0.935644  | 0.955209  | 1.000      |
| 211  | GOBP-AMYLOID-PRECURSOR-PROTEIN-METABOLIC-PROCESS  | 5    | 0.253012 | 0.652189 | 0.910714  | 0.956217  | 1.000      |
| 212  | GOBP-AMYLOID-PRECURSOR-PROTEIN-CATABOLIC-PROCESS  | 5    | 0.253012 | 0.646092 | 0.925267  | 0.957335  | 1.000      |

Continuation of Table S6

|     | NAME                                              | ID            | SIZE | ES        | NES       | NOM.p.val | FDR.q.val | FWER.p.val |
|-----|---------------------------------------------------|---------------|------|-----------|-----------|-----------|-----------|------------|
| 213 | GOBP-AMYLOID-BETA-METABOLIC-PROCESS               | GO-0050435    | 5    | 0.253012  | 0.632551  | 0.928315  | 0.964982  | 1.000      |
| 214 | GOBP-POSITIVE-REGULATION-OF-HEMOPOIESIS           | GO-1903708    | 7    | 0.197531  | 0.592621  | 0.940520  | 0.988652  | 1.000      |
| 215 | GOBP-LONG-TERM-SYNAPTIC-DEPRESSION                | GO-0060292    | 5    | 0.228916  | 0.585973  | 0.962838  | 0.987705  | 1.000      |
| 216 | GOBP-CIRCADIAN-REGULATION-OF-GENE-EXPRESSION      | GO-0032922    | 5    | 0.216868  | 0.560846  | 0.987138  | 0.994252  | 1.000      |
| 217 | GOBP-ANATOMICAL-STRUCTURE-FORMATION-INVOLVED-I... | GO-0048646    | 20   | 0.115483  | 0.553497  | 0.952537  | 0.992273  | 1.000      |
| 218 | GOBP-RESPONSE-TO-INSULIN                          | GO-0032868    | 5    | 0.216868  | 0.540678  | 0.988000  | 0.991729  | 1.000      |
| 219 | GOBP-AMEBOIDAL-TYPE-CELL-MIGRATION                | GO-0001667    | 11   | 0.121030  | 0.452301  | 0.995327  | 0.999161  | 1.000      |
| 220 | GOBP-TUBE-MORPHOGENESIS                           | GO-0035239    | 15   | -0.132209 | -0.405127 | 0.998767  | 0.998400  | 1.000      |
| 221 | GOBP-REGULATION-OF-RECEPTOR-MEDIATED-ENDOCYTOSIS  | GO-0048259    | 5    | -0.194501 | -0.430792 | 0.998615  | 0.998509  | 1.000      |
| 222 | GOBP-PROTEIN-CATABOLIC-PROCESS                    | GO-0030163    | 8    | -0.173185 | -0.447153 | 0.998706  | 0.998680  | 1.000      |
| 223 | GOBP-BLOOD-VESSEL-MORPHOGENESIS                   | GO-0048514    | 14   | -0.153097 | -0.469870 | 0.990315  | 0.997030  | 1.000      |
| 224 | GOBP-REGULATION-OF-ENDOCYTOSIS                    | GO-0030100    | 6    | -0.197535 | -0.470647 | 0.997308  | 0.998870  | 1.000      |
| 225 | GOBP-EPIDERMIS-DEVELOPMENT                        | GO-0008544    | 5    | -0.209928 | -0.470947 | 0.997319  | 1.000000  | 1.000      |
| 226 | GOBP-RESPONSE-TO-NERVE-GROWTH-FACTOR              | GO-1990089    | 7    | -0.198299 | -0.488053 | 0.989218  | 0.999018  | 1.000      |
| 227 | GOBP-NEGATIVE-REGULATION-OF-DEVELOPMENTAL-PROCESS | GO-0051093    | 13   | -0.172485 | -0.508365 | 0.972739  | 0.995216  | 1.000      |
| 228 | GOBP-NEGATIVE-REGULATION-OF-CELL-DIFFERENTIATION  | GO-0045596    | 13   | -0.172485 | -0.508556 | 0.980296  | 0.997156  | 1.000      |
| 229 | GOBP-POSITIVE-REGULATION-OF-CELLULAR-COMPONENT... | GO-0044089    | 9    | -0.199390 | -0.523379 | 0.966837  | 0.993886  | 1.000      |
| 230 | GOBP-REGULATION-OF-MYELOID-LEUKOCYTE-DIFFERENT... | GO-0002761    | 8    | -0.204775 | -0.530390 | 0.973958  | 0.993193  | 1.000      |
| 231 | GOBP-NEURON-MIGRATION                             | GO-0001764    | 5    | -0.240105 | -0.531848 | 0.968792  | 0.994584  | 1.000      |
| 232 | GOBP-REGULATION-OF-CELLULAR-COMPONENT-MOVEMENT    | GO-0051270    | 15   | -0.173636 | -0.532002 | 0.969448  | 0.996552  | 1.000      |
| 233 | GOBP-MACROMOLECULE-CATABOLIC-PROCESS              | GO-0009057    | 11   | -0.190412 | -0.537279 | 0.968314  | 0.996250  | 1.000      |
| 234 | GOBP-NEGATIVE-REGULATION-OF-INTRACELLULAR-SIGN... | GO-1902532    | 7    | -0.224298 | -0.546244 | 0.969617  | 0.994337  | 1.000      |
| 235 | REACTOME-SIGNALING-BY-RHO-GTPASES-MIRO-GTPASES... | R-RNO-9716542 | 9    | -0.209149 | -0.555692 | 0.969152  | 0.991834  | 1.000      |
| 236 | GOBP-NEGATIVE-REGULATION-OF-NEURON-APOPTOTIC-P... | GO-0043524    | 8    | -0.215662 | -0.556955 | 0.953765  | 0.993163  | 1.000      |
| 237 | REACTOME-RHO-GTPASE-EFFECTORS                     | R-RNO-195258  | 9    | -0.209149 | -0.560037 | 0.951571  | 0.993598  | 1.000      |
| 238 | GOBP-EMBRYO-DEVELOPMENT                           | GO-0009790    | 14   | -0.182742 | -0.561944 | 0.963270  | 0.994562  | 1.000      |
| 239 | GOBP-REGULATION-OF-SMALL-MOLECULE-METABOLIC-PR... | GO-0062012    | 9    | -0.214866 | -0.565652 | 0.951507  | 0.994541  | 1.000      |
| 240 | GOBP-PEPTIDYL-LYSINE-MODIFICATION                 | GO-0018205    | 5    | -0.250422 | -0.567693 | 0.972337  | 0.995491  | 1.000      |
| 241 | GOBP-BIOLOGICAL-PROCESS-INVOLVED-IN-SYMBIOTIC.... | GO-0044440    | 10   | -0.204958 | -0.571216 | 0.944862  | 0.995532  | 1.000      |
| 242 | GOBP-POSITIVE-REGULATION-OF-ORGANELLE-ORGANIZA... | GO-0010638    | 10   | -0.209747 | -0.574943 | 0.945083  | 0.995375  | 1.000      |
| 243 | GOBP-RESPONSE-TO-LIPID                            | GO-0033993    | 19   | -0.177198 | -0.586073 | 0.948538  | 0.990529  | 1.000      |
| 244 | GOBP-REPRODUCTIVE-SYSTEM-DEVELOPMENT              | GO-0061458    | 6    | -0.248605 | -0.586994 | 0.962667  | 0.991971  | 1.000      |
| 245 | GOBP-POSITIVE-REGULATION-OF-CELLULAR-COMPONENT... | GO-0051130    | 24   | -0.172410 | -0.587822 | 0.933486  | 0.993493  | 1.000      |
| 246 | GOBP-REGULATION-OF-PROTEIN-CATABOLIC-PROCESS      | GO-0042176    | 7    | -0.238198 | -0.588718 | 0.946309  | 0.995016  | 1.000      |
| 247 | GOBP-CHROMOSOME-ORGANIZATION                      | GO-0051276    | 6    | -0.255983 | -0.589788 | 0.932065  | 0.996329  | 1.000      |
| 248 | GOBP-BIOLOGICAL-ADHESION                          | GO-0002610    | 19   | -0.183289 | -0.592441 | 0.915677  | 0.996583  | 1.000      |
| 249 | GOBP-PATTERN-SPECIFICATION-PROCESS                | GO-0007389    | 6    | -0.252871 | -0.593127 | 0.938005  | 0.998234  | 1.000      |
| 250 | GOBP-REGIONALIZATION                              | GO-0003002    | 6    | -0.252871 | -0.593127 | 0.938005  | 0.998234  | 1.000      |
| 251 | REACTOME-SIGNALING-BY-RECEPTOR-TYROSINE-KINASES   | R-RNO-9006934 | 26   | -0.175447 | -0.597356 | 0.914097  | 0.999403  | 1.000      |
| 252 | GOBP-LIPID-METABOLIC-PROCESS                      | GO-0006629    | 15   | -0.227896 | -0.605589 | 0.932161  | 0.995443  | 1.000      |
| 253 | GOBP-NEGATIVE-REGULATION-OF-KINASE-ACTIVITY       | GO-0033673    | 5    | -0.272806 | -0.605905 | 0.950912  | 0.997531  | 1.000      |
| 254 | GOBP-REGULATION-OF-LIPID-BIOSYNTHETIC-PROCESS     | GO-0046890    | 6    | -0.260571 | -0.609618 | 0.936592  | 0.997014  | 1.000      |
| 255 | GOBP-CARBOHYDRATE-HOMEOSTASIS                     | GO-0033500    | 7    | -0.245852 | -0.610074 | 0.924084  | 0.998793  | 1.000      |



Continuation of Table S6

| NAME | ID                                                | SIZE          | ES        | NES       | NOM.p.val | FDR.q.val | FWER.p.val |
|------|---------------------------------------------------|---------------|-----------|-----------|-----------|-----------|------------|
| 256  | GOBP-NEGATIVE-REGULATION-OF-TRANSFERASE-ACTIVITY  | 5             | -0.272896 | -0.613962 | 0.932489  | 0.997866  | 1.000      |
| 257  | GOBP-REGULATION-OF-MUSCLE-CELL-DIFFERENTIATION    | 6             | -0.258661 | -0.614355 | 0.929825  | 0.999670  | 1.000      |
| 258  | GOBP-RESPONSE-TO-KETONE                           | 7             | -0.246649 | -0.614562 | 0.916329  | 1.000000  | 1.000      |
| 259  | GOBP-CELL-CELL-JUNCTION-ORGANIZATION              | 6             | -0.259315 | -0.616435 | 0.932705  | 1.000000  | 1.000      |
| 260  | GOBP-NEGATIVE-REGULATION-OF-ANION-TRANSPORT       | 8             | -0.241572 | -0.619709 | 0.915232  | 1.000000  | 1.000      |
| 261  | GOBP-RESPONSE-TO-GROWTH-FACTOR                    | 18            | -0.191183 | -0.619863 | 0.914184  | 1.000000  | 1.000      |
| 262  | GOBP-LOCOMOTION                                   | 31            | -0.175239 | -0.621669 | 0.924208  | 1.000000  | 1.000      |
| 263  | HALLMARK-P13K-AKT-MTOR-SIGNALING                  | M5923         | -0.262890 | -0.624989 | 0.937330  | 1.000000  | 1.000      |
| 264  | GOBP-MUSCLE-CELL-DIFFERENTIATION                  | 10            | -0.227547 | -0.625683 | 0.933333  | 1.000000  | 1.000      |
| 265  | GOBP-LIPID-BIOSYNTHETIC-PROCESS                   | 6             | -0.260571 | -0.627147 | 0.917469  | 1.000000  | 1.000      |
| 266  | GOBP-NEGATIVE-REGULATION-OF-PROTEIN-MODIFICATION  | 10            | -0.226163 | -0.628560 | 0.920573  | 1.000000  | 1.000      |
| 267  | GOBP-APOPTOTIC-PROCESS                            | 35            | -0.174447 | -0.633373 | 0.908197  | 1.000000  | 1.000      |
| 268  | REACTOME-FC-EPSILON-RECEPTOR-FCERL-SIGNALING      | R-RNO-2454202 | -0.257681 | -0.635552 | 0.910526  | 1.000000  | 1.000      |
| 269  | GOBP-NEUROINFLAMMATORY-RESPONSE                   | GO-0150076    | -0.286797 | -0.637802 | 0.925666  | 1.000000  | 1.000      |
| 270  | GOBP-COAGULATION                                  | GO-0050817    | -0.249033 | -0.639136 | 0.917323  | 1.000000  | 1.000      |
| 271  | GOBP-CELLULAR-LIPID-METABOLIC-PROCESS             | GO-0044255    | -0.264238 | -0.642952 | 0.902145  | 1.000000  | 1.000      |
| 272  | GOBP-REGULATION-OF-VASCULATURE-DEVELOPMENT        | GO-1901342    | -0.287142 | -0.643679 | 0.917630  | 1.000000  | 1.000      |
| 273  | REACTOME-EXTRACELLULAR-MATRIX-ORGANIZATION        | R-RNO-1474244 | -0.287071 | -0.645639 | 0.915849  | 1.000000  | 1.000      |
| 274  | GOBP-NEGATIVE-REGULATION-OF-SIGNALING             | GO-0023057    | -0.193791 | -0.648334 | 0.885514  | 1.000000  | 1.000      |
| 275  | GOBP-REGULATION-OF-NEURON-PROJECTION-DEVELOPMENT  | GO-0010975    | -0.212260 | -0.649270 | 0.885305  | 1.000000  | 1.000      |
| 276  | GOBP-NEGATIVE-REGULATION-OF-NEURON-DEATH          | GO-1901215    | -0.231786 | -0.650697 | 0.885101  | 1.000000  | 1.000      |
| 277  | GOBP-FC-EPSILON-RECEPTOR-SIGNALING-PATHWAY        | GO-0038095    | -0.257681 | -0.651763 | 0.884115  | 1.000000  | 1.000      |
| 278  | GOBP-CELL-MIGRATION                               | GO-0016477    | -0.197845 | -0.653618 | 0.882217  | 1.000000  | 1.000      |
| 279  | GOBP-NEGATIVE-REGULATION-OF-ION-TRANSPORT         | GO-0043271    | -0.229115 | -0.654249 | 0.892269  | 1.000000  | 1.000      |
| 280  | GOBP-PHAGOCYTOSIS                                 | GO-0006909    | -0.293677 | -0.655286 | 0.922644  | 1.000000  | 1.000      |
| 281  | GOBP-POSTTRANSCRIPTIONAL-REGULATION-OF-GENE-EX... | GO-0010608    | -0.258709 | -0.655638 | 0.887550  | 1.000000  | 1.000      |
| 282  | GOBP-REGULATION-OF-PROTEIN-TYROSINE-KINASE-ACT... | GO-0061097    | -0.298844 | -0.659869 | 0.891929  | 1.000000  | 1.000      |
| 283  | GOBP-POSITIVE-REGULATION-OF-PROTEIN-TYROSINE-K... | GO-0061098    | -0.298844 | -0.660444 | 0.891929  | 1.000000  | 1.000      |
| 284  | GOBP-PLATELET-ACTIVATION                          | GO-0030168    | -0.279646 | -0.661764 | 0.903533  | 1.000000  | 1.000      |
| 285  | GOBP-POSITIVE-REGULATION-OF-MYELOID-LEUKOCYTE-... | GO-0002763    | -0.277683 | -0.663726 | 0.897849  | 1.000000  | 1.000      |
| 286  | GOBP-REGULATION-OF-ANATOMICAL-STRUCTURE-MORPHO... | GO-0022603    | -0.212534 | -0.665297 | 0.880756  | 1.000000  | 1.000      |
| 287  | GOBP-REGULATION-OF-WNT-SIGNALING-PATHWAY          | GO-0030111    | -0.301835 | -0.670719 | 0.882603  | 1.000000  | 1.000      |
| 288  | REACTOME-NUCLEAR-EVENTS-KINASE-AND-TRANSCRIPTI... | R-RNO-198725  | -0.238645 | -0.673050 | 0.884712  | 1.000000  | 1.000      |
| 289  | GOBP-PEPTIDYL-SERINE-MODIFICATION                 | GO-0018209    | -0.227826 | -0.673902 | 0.864634  | 1.000000  | 1.000      |
| 290  | HALLMARK-EPITHELIAL-MESENCHYMAL-TRANSITION        | M5930         | -0.296845 | -0.674608 | 0.879044  | 1.000000  | 1.000      |
| 291  | GOBP-CELLULAR-RESPONSE-TO-PEPTIDE                 | GO-1901653    | -0.229450 | -0.681785 | 0.868712  | 1.000000  | 1.000      |
| 292  | GOBP-RESPONSE-TO-PEPTIDE                          | GO-1901652    | -0.214231 | -0.684356 | 0.874118  | 1.000000  | 1.000      |
| 293  | GOBP-NEGATIVE-REGULATION-OF-TRANSMEMBRANE-TRAN... | GO-0034763    | -0.269125 | -0.686373 | 0.864247  | 1.000000  | 1.000      |
| 294  | REACTOME-LEISHMANIA-INFECTION                     | R-HSA-9658195 | -0.250845 | -0.686805 | 0.864428  | 1.000000  | 1.000      |
| 295  | GOBP-CELL-JUNCTION-ASSEMBLY                       | GO-0034329    | -0.269247 | -0.687350 | 0.870249  | 1.000000  | 1.000      |
| 296  | GOBP-RESPONSE-TO-BIOTIC-STIMULUS                  | GO-0009607    | -0.217569 | -0.689466 | 0.869880  | 1.000000  | 1.000      |
| 297  | GOBP-CELL-CYCLE                                   | GO-0007049    | -0.207051 | -0.690020 | 0.853714  | 1.000000  | 1.000      |
| 298  | GOBP-SMALL-MOLECULE-BIOSYNTHETIC-PROCESS          | GO-0044283    | -0.311213 | -0.691045 | 0.866109  | 1.000000  | 1.000      |

Continuation of Table S6

| NAME                                                           | ID           | SIZE | ES        | NES       | NOM.p.val | FDR.q.val | FWER.p.val |
|----------------------------------------------------------------|--------------|------|-----------|-----------|-----------|-----------|------------|
| 299 GOBP-PHOSPHATIDYLINOSITOL_3_KINASE_SIGNALING               | GO-0014065   | 7    | -0.278522 | -0.692001 | 0.857916  | 1.000000  | 1.000      |
| 300 GOBP-RECEPTOR-MEDIATED-ENDOCYTOSIS                         | GO-0006898   | 6    | -0.291085 | -0.693525 | 0.846462  | 1.000000  | 1.000      |
| 301 GOBP-REGULATION-OF-RESPONSE-TO-STRESS                      | GO-0080134   | 19   | -0.213301 | -0.693768 | 0.855803  | 1.000000  | 1.000      |
| 302 GOBP-NEGATIVE-REGULATION-OF-SYNAPTIC-TRANSMISSION          | GO-0050805   | 6    | -0.292428 | -0.695632 | 0.857143  | 1.000000  | 1.000      |
| 303 GOBP-PEPTIDYL-TYROSINE-MODIFICATION                        | GO-0018212   | 10   | -0.252436 | -0.696569 | 0.840149  | 1.000000  | 1.000      |
| 304 REACTOME-CELL-CYCLE-MITOTIC                                | R-RNO-69278  | 5    | -0.314616 | -0.702142 | 0.857531  | 1.000000  | 1.000      |
| 305 GOBP-ORGANONITROGEN-COMPOUND-BIOSYNTHETIC-PROCESS          | GO-1901566   | 13   | -0.234257 | -0.704440 | 0.844282  | 1.000000  | 1.000      |
| 306 GOBP-CELL-ACTIVATION                                       | GO-0001775   | 22   | -0.212307 | -0.705937 | 0.846336  | 1.000000  | 1.000      |
| 307 GOBP-NEGATIVE-REGULATION-OF-PHOSPHORUS-METABOLISM          | GO-0010563   | 9    | -0.260613 | -0.706439 | 0.822165  | 1.000000  | 1.000      |
| 308 GOBP-REGULATION-OF-CELL-ACTIVATION                         | GO-0050865   | 8    | -0.273410 | -0.706843 | 0.864682  | 1.000000  | 1.000      |
| 309 GOBP-POSITIVE-REGULATION-OF-LOCOMOTION                     | GO-0040017   | 11   | -0.247204 | -0.708535 | 0.839196  | 1.000000  | 1.000      |
| 310 GOBP-PROTEIN-MODIFICATION-BY-SMALL-PROTEIN-CONJUGATION     | GO-0032446   | 6    | -0.303729 | -0.717496 | 0.822342  | 1.000000  | 1.000      |
| 311 GOBP-IMPORT-INTO-CELL                                      | GO-0098657   | 6    | -0.303136 | -0.718434 | 0.833333  | 1.000000  | 1.000      |
| 312 GOBP-ORGANONITROGEN-COMPOUND-CATABOLIC-PROCESS             | GO-1901565   | 10   | -0.262245 | -0.719173 | 0.825255  | 1.000000  | 1.000      |
| 313 GOBP-REGULATION-OF-PHOSPHATIDYLINOSITOL_3_KINASE_ACTIVITY  | GO-0014066   | 6    | -0.311008 | -0.723242 | 0.841611  | 1.000000  | 1.000      |
| 314 GOBP-REGULATION-OF-PROTEIN-MODIFICATION-PROCESS            | GO-0031399   | 28   | -0.208360 | -0.725342 | 0.815107  | 1.000000  | 1.000      |
| 315 GOBP-DEFENSE-RESPONSE                                      | GO-0006952   | 19   | -0.222688 | -0.725652 | 0.822562  | 1.000000  | 1.000      |
| 316 REACTOME-SIGNALING-BY-NTRKS                                | R-RNO-166520 | 18   | -0.225937 | -0.726817 | 0.803140  | 1.000000  | 1.000      |
| 317 GOBP-POSITIVE-REGULATION-OF-EPITHELIAL-CELL-PROLIFERATION  | GO-0050679   | 7    | -0.293809 | -0.729860 | 0.814136  | 1.000000  | 1.000      |
| 318 GOBP-MUSCLE-STRUCTURE-DEVELOPMENT                          | GO-0061061   | 16   | -0.235574 | -0.731154 | 0.817001  | 1.000000  | 1.000      |
| 319 GOBP-REGULATION-OF-CELL-DEATH                              | GO-0010941   | 34   | -0.202377 | -0.732338 | 0.822727  | 1.000000  | 1.000      |
| 320 GOBP-REGULATION-OF-CELL-CYCLE-PROCESS                      | GO-0010564   | 5    | -0.322924 | -0.733637 | 0.835022  | 1.000000  | 1.000      |
| 321 GOBP-REGULATION-OF-CELLULAR-AMIDE-METABOLIC-PROCESS        | GO-0034248   | 9    | -0.272273 | -0.737085 | 0.828931  | 1.000000  | 1.000      |
| 322 GOBP-NEURON-PROJECTION-GUIDANCE                            | GO-0097485   | 9    | -0.277235 | -0.737589 | 0.832700  | 1.000000  | 1.000      |
| 323 GOBP-RESPONSE-TO-HORMONE                                   | GO-0009725   | 20   | -0.228754 | -0.744769 | 0.819861  | 1.000000  | 1.000      |
| 324 GOBP-WOUND-HEALING                                         | GO-0042060   | 13   | -0.254044 | -0.745919 | 0.795620  | 1.000000  | 1.000      |
| 325 GOBP-REGULATION-OF-CELLULAR-RESPONSE-TO-STRESS             | GO-0080135   | 9    | -0.281502 | -0.749944 | 0.787565  | 1.000000  | 1.000      |
| 326 GOBP-ACTIVATION-OF-PROTEIN-KINASE-ACTIVITY                 | GO-0032147   | 10   | -0.274616 | -0.752277 | 0.786164  | 1.000000  | 1.000      |
| 327 GOBP-NEGATIVE-REGULATION-OF-LIPID-METABOLIC-PROCESS        | GO-0045833   | 5    | -0.340077 | -0.754178 | 0.804469  | 1.000000  | 1.000      |
| 328 GOBP-REGULATION-OF-RESPONSE-TO-EXTERNAL-STIMULUS           | GO-0032101   | 15   | -0.249899 | -0.758116 | 0.774699  | 1.000000  | 1.000      |
| 329 GOBP-EPITHELIAL-DEVELOPMENT                                | GO-0060429   | 15   | -0.245869 | -0.761841 | 0.761336  | 1.000000  | 1.000      |
| 330 GOBP-NEGATIVE-REGULATION-OF-IMMUNE-SYSTEM-PROCESS          | GO-0002683   | 5    | -0.347808 | -0.767212 | 0.803596  | 1.000000  | 1.000      |
| 331 GOBP-CELLULAR-MACROMOLECULE-CATABOLIC-PROCESS              | GO-0044265   | 5    | -0.342446 | -0.768822 | 0.772480  | 1.000000  | 1.000      |
| 332 GOBP-INTRACELLULAR-PROTEIN-TRANSPORT                       | GO-0006886   | 8    | -0.295465 | -0.767536 | 0.774366  | 0.999607  | 1.000      |
| 333 GOBP-RESPONSE-TO-OXYGEN-LEVELS                             | GO-0070482   | 8    | -0.300775 | -0.769724 | 0.770252  | 0.998719  | 1.000      |
| 334 REACTOME-TOLL-LIKE-RECEPTOR-CASCADES                       | R-RNO-168898 | 8    | -0.304442 | -0.774192 | 0.761255  | 0.994478  | 1.000      |
| 335 GOBP-REGULATION-OF-PHOSPHORUS-METABOLIC-PROCESS            | GO-0051174   | 26   | -0.228230 | -0.774406 | 0.767361  | 0.996698  | 1.000      |
| 336 GOBP-POSITIVE-REGULATION-OF-ENDOTHELIAL-CELL-PROLIFERATION | GO-0001938   | 6    | -0.327253 | -0.777736 | 0.762640  | 0.994306  | 1.000      |
| 337 GOBP-CELLULAR-RESPONSE-TO-KETONE                           | GO-1901655   | 5    | -0.352709 | -0.778505 | 0.769441  | 0.995666  | 1.000      |
| 338 GOBP-REGULATION-OF-AXONOGENESIS                            | GO-0050770   | 7    | -0.314004 | -0.779999 | 0.760695  | 0.995861  | 1.000      |
| 339 GOBP-REGULATION-OF-CYTOSKELETON-ORGANIZATION               | GO-0051493   | 5    | -0.342908 | -0.780034 | 0.780585  | 0.998379  | 1.000      |
| 340 GOBP-NUCLEAR-TRANSPORT                                     | GO-0051169   | 5    | -0.353719 | -0.780372 | 0.773040  | 1.000000  | 1.000      |
| 341 GOBP-NEGATIVE-REGULATION-OF-PROTEIN-CATABOLIC-PROCESS      | GO-0042177   | 5    | -0.352341 | -0.782753 | 0.773352  | 0.999267  | 1.000      |

Continuation of Table S6

|     | NAME                                               | ID            | SIZE | ES        | NES       | NOM.p.val | FDR.q.val | FWER.p.val |
|-----|----------------------------------------------------|---------------|------|-----------|-----------|-----------|-----------|------------|
| 342 | REACTOME_MYD88-INDEPENDENT-TLR4-CASCADE            | R-RNO-166166  | 8    | -0.304442 | -0.784280 | 0.738562  | 0.999455  | 1.000      |
| 343 | GOBP-POSITIVE-REGULATION-OF-CATION-TRANSMEMBRAN... | GO-1904064    | 5    | -0.348398 | -0.787982 | 0.768377  | 0.996321  | 1.000      |
| 344 | REACTOME-TOLL-LIKE-RECEPTOR-TLR1-TLR2-CASCADE      | R-RNO-168179  | 8    | -0.304442 | -0.788548 | 0.753264  | 0.998053  | 1.000      |
| 345 | GOBP-ERBB-SIGNALING-PATHWAY                        | GO-0038127    | 5    | -0.347093 | -0.789239 | 0.763984  | 0.999589  | 1.000      |
| 346 | GOBP-REGULATION-OF-CELL-CYCLE                      | GO-0051726    | 13   | -0.270568 | -0.789240 | 0.735802  | 1.000000  | 1.000      |
| 347 | GOBP-NEURON-DEATH                                  | GO-0070997    | 18   | -0.247553 | -0.790334 | 0.752625  | 1.000000  | 1.000      |
| 348 | GOBP-REGULATION-OF-TRANSFERASE-ACTIVITY            | GO-0051338    | 21   | -0.239325 | -0.791387 | 0.744509  | 1.000000  | 1.000      |
| 349 | REACTOME-CIRCADIAN-CLOCK                           | R-HSA-400253  | 5    | -0.361446 | -0.792476 | 0.750341  | 1.000000  | 1.000      |
| 350 | GOBP-CELLULAR-RESPONSE-TO-DNA-DAMAGE-STIMULUS      | GO-0006974    | 5    | -0.360847 | -0.792881 | 0.753156  | 1.000000  | 1.000      |
| 351 | GOBP-STRATIATED-MUSCLE-CELL-DIFFERENTIATION        | GO-0051146    | 9    | -0.296096 | -0.794515 | 0.752282  | 1.000000  | 1.000      |
| 352 | REACTOME-TOLL-LIKE-RECEPTOR-9-TLR9-CASCADE         | R-RNO-168138  | 8    | -0.304442 | -0.797109 | 0.742466  | 1.000000  | 1.000      |
| 353 | GOBP-REGULATION-OF-PROTEIN-LOCALIZATION-TO-CEL...  | GO-1904375    | 6    | -0.340436 | -0.799511 | 0.756164  | 1.000000  | 1.000      |
| 354 | GOBP-REGULATION-OF-PROTEIN-KINASE-ACTIVITY         | GO-0045859    | 21   | -0.239325 | -0.800034 | 0.732329  | 1.000000  | 1.000      |
| 355 | GOBP-MULTICELLULAR-ORGANISMAL-HOMEOSTASIS          | GO-0048871    | 12   | -0.275249 | -0.808625 | 0.722153  | 0.993261  | 1.000      |
| 356 | GOBP-POSITIVE-REGULATION-OF-MYELOID-CELL-DIFFE...  | GO-0045639    | 7    | -0.325086 | -0.809200 | 0.730978  | 0.994966  | 1.000      |
| 357 | GOBP-INTRACELLULAR-TRANSPORT                       | GO-0046907    | 10   | -0.297707 | -0.813515 | 0.725131  | 0.990314  | 1.000      |
| 358 | GOBP-REGULATION-OF-PROTEIN-STABILITY               | GO-0031647    | 5    | -0.367587 | -0.813727 | 0.746287  | 0.992622  | 1.000      |
| 359 | REACTOME-TRANSCRIPTIONAL-REGULATION-BY-TP53        | R-RNO-3700989 | 6    | -0.344722 | -0.814512 | 0.718291  | 0.993945  | 1.000      |
| 360 | GOBP-REGULATION-OF-LIPASE-ACTIVITY                 | GO-0060191    | 6    | -0.346693 | -0.816252 | 0.728571  | 0.993708  | 1.000      |
| 361 | GOBP-POSITIVE-REGULATION-OF-PROTEIN-KINASE-ACT...  | GO-0045860    | 18   | -0.254491 | -0.817105 | 0.725537  | 0.994955  | 1.000      |
| 362 | GOBP-REGULATION-OF-PHOSPHOLIPASE-ACTIVITY          | GO-0010517    | 8    | -0.346693 | -0.817347 | 0.715223  | 0.997281  | 1.000      |
| 363 | GOBP-SMALL-GTPASE-MEDIATED-SIGNAL-TRANSDUCTION     | GO-0007264    | 8    | -0.312748 | -0.818300 | 0.722149  | 0.998404  | 1.000      |
| 364 | GOBP-RESPONSE-TO-TEMPERATURE-STIMULUS              | GO-0009266    | 9    | -0.309381 | -0.818673 | 0.703608  | 1.000000  | 1.000      |
| 365 | GOBP-TRANSMEMBRANE-RECEPTOR-PROTEIN-TYROSINE_K...  | GO-0007169    | 19   | -0.254835 | -0.819756 | 0.731536  | 1.000000  | 1.000      |
| 366 | GOBP-POSITIVE-REGULATION-OF-RESPONSE-TO-EXTERN...  | GO-0032103    | 9    | -0.304854 | -0.820379 | 0.730769  | 1.000000  | 1.000      |
| 367 | GOBP-RESPONSE-TO-OXYGEN-CONTAINING-COMPOUND        | GO-1901700    | 39   | -0.224616 | -0.821895 | 0.685430  | 1.000000  | 1.000      |
| 368 | REACTOME-MEMBRANE-TRAFFICKING                      | R-RNO-199991  | 5    | -0.376994 | -0.826700 | 0.710345  | 0.996976  | 1.000      |
| 369 | GOBP-AGING                                         | GO-0007568    | 13   | -0.274892 | -0.828709 | 0.685961  | 0.996012  | 1.000      |
| 370 | GOBP-POSITIVE-REGULATION-OF-ION-TRANSPORT          | GO-0043270    | 17   | -0.261551 | -0.829262 | 0.689696  | 0.997813  | 1.000      |
| 371 | GOBP-CARBOHYDRATE-DERIVATIVE-BIOSYNTHETIC-PROCESS  | GO-1901137    | 5    | -0.363253 | -0.829414 | 0.709632  | 1.000000  | 1.000      |
| 372 | GOBP-DEVELOPMENTAL-PROCESS-INVOLVED-IN-REPRODU...  | GO-0003006    | 11   | -0.295691 | -0.83283  | 0.706186  | 0.995946  | 1.000      |
| 373 | GOBP-NEGATIVE-REGULATION-OF-PHOSPHORYLATION        | GO-0042326    | 7    | -0.331776 | -0.833539 | 0.689243  | 0.998305  | 1.000      |
| 374 | GOBP-PEPTIDE-BIOSYNTHETIC-PROCESS                  | GO-0043043    | 6    | -0.352211 | -0.834422 | 0.701705  | 0.999518  | 1.000      |
| 375 | GOBP-NERVE-DEVELOPMENT                             | GO-0021675    | 9    | -0.317591 | -0.834744 | 0.683444  | 1.000000  | 1.000      |
| 376 | REACTOME-INTERLEUKIN-17-SIGNALING                  | R-RNO-448424  | 6    | -0.358449 | -0.837367 | 0.704762  | 0.999686  | 1.000      |
| 377 | GOBP-HEART-DEVELOPMENT                             | GO-0007507    | 6    | -0.352211 | -0.837584 | 0.692617  | 1.000000  | 1.000      |
| 378 | GOBP-AMIDE-BIOSYNTHETIC-PROCESS                    | GO-0043604    | 6    | -0.352211 | -0.838260 | 0.689655  | 1.000000  | 1.000      |
| 379 | GOBP-REGULATION-OF-PROTEIN-PHOSPHORYLATION         | GO-0001932    | 25   | -0.244811 | -0.840052 | 0.677602  | 1.000000  | 1.000      |
| 380 | GOBP-CARDIAC-MUSCLE-TISSUE-DEVELOPMENT             | GO-0048738    | 6    | -0.361401 | -0.840901 | 0.684573  | 1.000000  | 1.000      |
| 381 | GOBP-CELLULAR-RESPONSE-TO-HORMONE-STIMULUS         | GO-0032870    | 11   | -0.296515 | -0.842400 | 0.680958  | 1.000000  | 1.000      |
| 382 | GOBP-PEPTIDYL-AMINO-ACID-MODIFICATION              | GO-0018193    | 22   | -0.253547 | -0.842411 | 0.666278  | 1.000000  | 1.000      |
| 383 | GOBP-LEUKOCYTE-MIGRATION                           | GO-0050900    | 6    | -0.360346 | -0.843995 | 0.699864  | 1.000000  | 1.000      |
| 384 | GOBP-MYOTUBE-DIFFERENTIATION                       | GO-0014902    | 5    | -0.370176 | -0.844379 | 0.686798  | 1.000000  | 1.000      |

Continuation of Table S6

| NAME                                                  | ID            | SIZE | ES        | NES       | NOM.p.val | FDR.q.val | FWER.p.val |
|-------------------------------------------------------|---------------|------|-----------|-----------|-----------|-----------|------------|
| 385 REACTOME-VESICLE-MEDIATED-TRANSPORT               | R-RNO-5653656 | 5    | -0.376994 | -0.844526 | 0.679063  | 1.000000  | 1.000      |
| 386 GOBP-REGULATION-OF-ANION-TRANSPORT                | GO-0044070    | 20   | -0.257561 | -0.847894 | 0.662486  | 1.000000  | 1.000      |
| 387 GOBP-PROTEIN-LOCALIZATION-TO-CELL-JUNCTION        | GO-1902414    | 6    | -0.364239 | -0.850727 | 0.692412  | 1.000000  | 1.000      |
| 388 GOBP-ANATOMICAL-STRUCTURE-HOMEOSTASIS             | GO-0060249    | 7    | -0.348264 | -0.852897 | 0.682825  | 1.000000  | 1.000      |
| 389 GOBP-LIPID-LOCALIZATION                           | GO-0010876    | 10   | -0.309666 | -0.854643 | 0.636129  | 1.000000  | 1.000      |
| 390 REACTOME-INTERFERON-SIGNALING                     | R-RNO-913531  | 6    | -0.363516 | -0.855462 | 0.685950  | 1.000000  | 1.000      |
| 391 GOBP-POSITIVE-REGULATION-OF-PROTEIN-PHOSPHORYL... | GO-0001934    | 22   | -0.254643 | -0.857540 | 0.657955  | 1.000000  | 1.000      |
| 392 GOBP-POSITIVE-REGULATION-OF-PROTEIN-MODIFICATI... | GO-0031401    | 22   | -0.254643 | -0.859371 | 0.677419  | 1.000000  | 1.000      |
| 393 GOBP-ORGANIC-ACID-METABOLIC-PROCESS               | GO-0006082    | 7    | -0.345324 | -0.863171 | 0.652174  | 0.999751  | 1.000      |
| 394 GOBP-REGULATION-OF-CELLULAR-COMPONENT-BIOGENESIS  | GO-0044087    | 10   | -0.318571 | -0.863970 | 0.630295  | 1.000000  | 1.000      |
| 395 GOBP-IMMUNE-EFFECTOR-PROCESS                      | GO-0002252    | 11   | -0.308999 | -0.865282 | 0.677096  | 1.000000  | 1.000      |
| 396 GOBP-RESPONSE-TO-ACID-CHEMICAL                    | GO-0001101    | 6    | -0.387760 | -0.866815 | 0.649596  | 1.000000  | 1.000      |
| 397 GOBP-RESPONSE-TO-MONOSACCHARIDE                   | GO-0034284    | 5    | -0.387760 | -0.866815 | 0.656944  | 1.000000  | 1.000      |
| 398 GOBP-ANIMAL-ORGAN-MORPHOGENESIS                   | GO-0009887    | 12   | -0.299789 | -0.869346 | 0.634116  | 1.000000  | 1.000      |
| 399 GOBP-ORGANIC-HYDROXY-COMPOUND-METABOLIC-PROCESS   | GO-1901615    | 8    | -0.335682 | -0.871615 | 0.637076  | 1.000000  | 1.000      |
| 400 REACTOME-CELL-CYCLE                               | R-RNO-1640170 | 6    | -0.363415 | -0.874535 | 0.655028  | 0.997995  | 1.000      |
| 401 GOBP-CELLULAR-RESPONSE-TO-NITROGEN-COMPOUND       | GO-1901699    | 20   | -0.274434 | -0.877699 | 0.667845  | 0.994704  | 1.000      |
| 402 GOBP-DNA-METABOLIC-PROCESS                        | GO-0006259    | 6    | -0.377127 | -0.878980 | 0.635097  | 0.995133  | 1.000      |
| 403 GOBP-GAMETE-GENERATION                            | GO-0007276    | 9    | -0.326947 | -0.880208 | 0.640741  | 0.995537  | 1.000      |
| 404 GOBP-MONOCARBOXYLIC-ACID-METABOLIC-PROCESS        | GO-0032787    | 6    | -0.371294 | -0.880307 | 0.625000  | 0.998390  | 1.000      |
| 405 GOBP-POSITIVE-REGULATION-OF-NEURON-PROJECTION...  | GO-0010976    | 5    | -0.391478 | -0.881422 | 0.629734  | 0.999122  | 1.000      |
| 406 GOBP-POSITIVE-REGULATION-OF-LIPASE-ACTIVITY       | GO-0060193    | 5    | -0.397590 | -0.882524 | 0.628965  | 0.999964  | 1.000      |
| 407 GOBP-RESPONSE-TO-CARBOHYDRATE                     | GO-0009743    | 5    | -0.387760 | -0.882662 | 0.645429  | 1.000000  | 1.000      |
| 408 GOBP-REGULATION-OF-CELLULAR-LOCALIZATION          | GO-0060341    | 17   | -0.276841 | -0.883352 | 0.614302  | 1.000000  | 1.000      |
| 409 GOBP-MITOTIC-CELL-CYCLE                           | GO-0000278    | 10   | -0.321030 | -0.885814 | 0.628750  | 1.000000  | 1.000      |
| 410 GOBP-REGULATION-OF-PHOSPHOLIPASE-C-ACTIVITY       | GO-1900274    | 5    | -0.397590 | -0.887387 | 0.625683  | 1.000000  | 1.000      |
| 411 GOBP-TRANSMEMBRANE-RECEPTOR-PROTEIN-SERINE-THR... | GO-0007178    | 6    | -0.380291 | -0.893817 | 0.637097  | 0.991324  | 1.000      |
| 412 REACTOME-DISEASES-OF-SIGNAL-TRANSDUCTION-BY-GR... | R-HSA-5663202 | 12   | -0.312370 | -0.900611 | 0.601242  | 0.979409  | 1.000      |
| 413 GOBP-CELLULAR-RESPONSE-TO-PEPTIDE-HORMONE-STIM... | GO-0071375    | 9    | -0.332458 | -0.901989 | 0.607417  | 0.979582  | 1.000      |
| 414 GOBP-POSITIVE-REGULATION-OF-TRANSFERASE-ACTIVITY  | GO-0051347    | 19   | -0.277121 | -0.902172 | 0.590698  | 0.982344  | 1.000      |
| 415 GOBP-LIPID-EXPORT-FROM-CELL                       | GO-0140353    | 5    | -0.405131 | -0.903079 | 0.594901  | 0.983592  | 1.000      |
| 416 GOBP-RECEPTOR-INTERNALIZATION                     | GO-0031623    | 5    | -0.414102 | -0.904008 | 0.620833  | 0.984813  | 1.000      |
| 417 GOBP-TUBE-DEVELOPMENT                             | GO-0033295    | 18   | -0.279044 | -0.904037 | 0.590047  | 0.987955  | 1.000      |
| 418 GOBP-NEGATIVE-REGULATION-OF-CATABOLIC-PROCESS     | GO-0009895    | 8    | -0.357945 | -0.904177 | 0.614474  | 0.990871  | 1.000      |
| 419 GOBP-CENTRAL-NERVOUS-SYSTEM-NEURON-DIFFERENTIA... | GO-0021953    | 5    | -0.408556 | -0.905451 | 0.596045  | 0.991274  | 1.000      |
| 420 REACTOME-ONCOGENIC-MAPK-SIGNALING                 | R-HSA-6802957 | 5    | -0.404445 | -0.905885 | 0.583102  | 0.993542  | 1.000      |
| 421 GOBP-NEGATIVE-REGULATION-OF-TRANSPORT             | GO-0051051    | 13   | -0.307395 | -0.906385 | 0.605875  | 0.995702  | 1.000      |
| 422 GOBP-CIRCULATORY-SYSTEM-DEVELOPMENT               | GO-0072359    | 21   | -0.272697 | -0.907594 | 0.594373  | 0.996318  | 1.000      |
| 423 GOBP-MUSCLE-CELL-DEVELOPMENT                      | GO-0055001    | 5    | -0.413976 | -0.910006 | 0.592437  | 0.993923  | 1.000      |
| 424 GOBP-MALE-GAMETE-GENERATION                       | GO-0048232    | 5    | -0.406309 | -0.910148 | 0.591922  | 0.996858  | 1.000      |
| 425 GOBP-RESPONSE-TO-EXTRACELLULAR-STIMULUS           | GO-0009991    | 13   | -0.314332 | -0.915547 | 0.602469  | 0.987841  | 1.000      |
| 426 GOBP-REGULATION-OF-CELLULAR-CATABOLIC-PROCESS     | GO-0031329    | 10   | -0.338927 | -0.916162 | 0.609665  | 0.989733  | 1.000      |
| 427 GOBP-VASCULATURE-DEVELOPMENT                      | GO-0001944    | 17   | -0.292637 | -0.916398 | 0.580952  | 0.992532  | 1.000      |

Continuation of Table S6

| NAME                                                  | ID            | SIZE | ES        | NES       | NOM.p.val | FDR.q.val | FWER.p.val |
|-------------------------------------------------------|---------------|------|-----------|-----------|-----------|-----------|------------|
| 428 GOBP-RESPONSE-TO-LIGHT-STIMULUS                   | GO-0009416    | 11   | -0.324988 | -0.916913 | 0.572660  | 0.994704  | 1.000      |
| 429 GOBP-NEGATIVE-REGULATION-OF-CELLULAR-COMPONENT... | GO-0051129    | 11   | -0.322351 | -0.919128 | 0.575309  | 0.992715  | 1.000      |
| 430 GOBP-REGULATION-OF-PROTEOLYSIS                    | GO-0030162    | 12   | -0.319656 | -0.920068 | 0.577307  | 0.994136  | 1.000      |
| 431 GOBP-CIRCADIAN-RHYTHM                             | GO-0007623    | 13   | -0.311067 | -0.923193 | 0.563882  | 0.990152  | 1.000      |
| 432 GOBP-POSITIVE-REGULATION-OF-PROTEIN-SERINE-THR... | GO-00071902   | 9    | -0.348141 | -0.925260 | 0.581425  | 0.988661  | 1.000      |
| 433 GOBP-RESPONSE-TO-PEPTIDE-HORMONE                  | GO-0043434    | 13   | -0.311667 | -0.925649 | 0.591584  | 0.991215  | 1.000      |
| 434 GOBP-PROTEIN-PHOSPHORYLATION                      | GO-0006468    | 33   | -0.258178 | -0.927232 | 0.590508  | 0.991023  | 1.000      |
| 435 GOBP-SMALL-MOLECULE-METABOLIC-PROCESS             | GO-0044281    | 16   | -0.301653 | -0.929089 | 0.572491  | 0.990244  | 1.000      |
| 436 GOBP-CELL-JUNCTION-ORGANIZATION                   | GO-0034330    | 19   | -0.287178 | -0.929359 | 0.571934  | 0.993020  | 1.000      |
| 437 GOBP-RESPONSE-TO-CADMIUM-ION                      | GO-0046686    | 6    | -0.400175 | -0.930835 | 0.566622  | 0.992912  | 1.000      |
| 438 GOBP-REGULATION-OF-CIRCADIAN-RHYTHM               | GO-0042752    | 7    | -0.378874 | -0.932605 | 0.583663  | 0.992145  | 1.000      |
| 439 GOBP-RESPONSE-TO-WOUNDING                         | GO-0009611    | 15   | -0.304270 | -0.934759 | 0.559466  | 0.990324  | 1.000      |
| 440 GOBP-RECEPTOR-METABOLIC-PROCESS                   | GO-0043112    | 5    | -0.414102 | -0.936405 | 0.567455  | 0.989864  | 1.000      |
| 441 GOBP-ENZYME-LINKED-RECEPTOR-PROTEIN-SIGNALING...  | GO-0007167    | 24   | -0.276629 | -0.937168 | 0.553265  | 0.991593  | 1.000      |
| 442 GOBP-NEGATIVE-REGULATION-OF-CELL-PROJECTION-OR... | GO-0031345    | 5    | -0.421065 | -0.940792 | 0.554960  | 0.986027  | 1.000      |
| 443 GOBP-REGULATION-OF-CELLULAR-PROTEIN-LOCALIZATION  | GO-1903827    | 12   | -0.323978 | -0.941481 | 0.567183  | 0.987688  | 1.000      |
| 444 GOBP-RESPONSE-TO-OXIDATIVE-STRESS                 | GO-0006979    | 8    | -0.368810 | -0.941561 | 0.559740  | 0.990994  | 1.000      |
| 445 GOBP-APOPTOTIC-MITOCHONDRIAL-CHANGES              | GO-0008637    | 6    | -0.400949 | -0.941702 | 0.537212  | 0.994168  | 1.000      |
| 446 GOBP-POSITIVE-REGULATION-OF-PHOSPHORUS-METABOL... | GO-0010562    | 23   | -0.278474 | -0.944471 | 0.549943  | 0.991147  | 1.000      |
| 447 GOBP-REGULATION-OF-PROTEIN-SERINE-THREONINE-KI... | GO-0071900    | 12   | -0.327308 | -0.946735 | 0.538365  | 0.988921  | 1.000      |
| 448 GOBP-POSITIVE-REGULATION-OF-ESTABLISHMENT-OF-P... | GO-1904951    | 5    | -0.422991 | -0.947729 | 0.557065  | 0.990086  | 1.000      |
| 449 GOBP-REGULATION-OF-PROTEIN-LOCALIZATION-TO-MEM... | GO-1905475    | 7    | -0.379583 | -0.948756 | 0.555108  | 0.991186  | 1.000      |
| 450 GOBP-REGULATION-OF-LIPID-METABOLIC-PROCESS        | GO-0019216    | 7    | -0.384869 | -0.949688 | 0.570470  | 0.992404  | 1.000      |
| 451 GOBP-REGULATION-OF-CATABOLIC-PROCESS              | GO-0009894    | 13   | -0.327352 | -0.954400 | 0.523515  | 0.984090  | 1.000      |
| 452 GOBP-RESPONSE-TO-HEAT                             | GO-0009408    | 7    | -0.388747 | -0.960420 | 0.522788  | 0.972928  | 1.000      |
| 453 GOBP-CELL-CELL-SIGNALING-BY-WNT                   | GO-0198738    | 7    | -0.382308 | -0.961325 | 0.528571  | 0.974079  | 1.000      |
| 454 GOBP-RESPONSE-TO-REACTIVE-OXYGEN-SPECIES          | GO-0000302    | 8    | -0.368810 | -0.961466 | 0.534301  | 0.977363  | 1.000      |
| 455 GOBP-REPRODUCTION                                 | GO-0000003    | 18   | -0.298492 | -0.963504 | 0.525120  | 0.975734  | 1.000      |
| 456 GOBP-RESPONSE-TO-INORGANIC-SUBSTANCE              | GO-0010035    | 19   | -0.294584 | -0.964646 | 0.515187  | 0.976577  | 1.000      |
| 457 GOBP-EMBRYONIC-ORGAN-DEVELOPMENT                  | GO-0048568    | 7    | -0.387277 | -0.966332 | 0.528121  | 0.975855  | 1.000      |
| 458 GOBP-MUSCLE-SYSTEM-PROCESS                        | GO-0003012    | 9    | -0.359911 | -0.968518 | 0.518325  | 0.973450  | 1.000      |
| 459 GOBP-CELLULAR-RESPONSE-TO-REACTIVE-OXYGEN-SPECIES | GO-0034614    | 7    | -0.393268 | -0.969891 | 0.533424  | 0.973708  | 1.000      |
| 460 REACTOME-SIGNALING-BY-NTRK2-TRKB                  | R-RNO-9006115 | 6    | -0.402439 | -0.974258 | 0.500000  | 0.966161  | 1.000      |
| 461 GOBP-REGULATION-OF-HYDROLASE-ACTIVITY             | GO-0051336    | 22   | -0.290844 | -0.982034 | 0.497090  | 0.950193  | 1.000      |
| 462 GOBP-REGULATION-OF-GLIOGENESIS                    | GO-0014013    | 5    | -0.447573 | -0.987050 | 0.496393  | 0.940750  | 1.000      |
| 463 GOBP-CELLULAR-RESPONSE-TO-CHEMICAL-STRESS         | GO-0062197    | 7    | -0.450095 | -0.990946 | 0.482260  | 0.934022  | 1.000      |
| 464 GOBP-ESTABLISHMENT-OF-PROTEIN-LOCALIZATION-TO-... | GO-0072594    | 5    | -0.450095 | -0.993776 | 0.488920  | 0.930425  | 1.000      |
| 465 GOBP-SECOND-MESSENGER-MEDIATED-SIGNALING          | GO-0019932    | 16   | -0.319290 | -0.994408 | 0.467213  | 0.932373  | 1.000      |
| 466 GOBP-POSITIVE-REGULATION-OF-GLIOGENESIS           | GO-0014015    | 5    | -0.447573 | -0.995198 | 0.473907  | 0.933761  | 1.000      |
| 467 REACTOME-NEUTROPHIL-DEGRANULATION                 | R-RNO-6798695 | 6    | -0.423572 | -0.997711 | 0.489160  | 0.935964  | 1.000      |
| 468 GOBP-CELL-ACTIVATION-INVOLVED-IN-IMMUNE-RESPONSE  | GO-0002263    | 6    | -0.423572 | -0.997711 | 0.467480  | 0.934686  | 1.000      |
| 469 GOBP-RESPONSE-TO-METAL-ION                        | GO-0010038    | 15   | -0.329158 | -0.998627 | 0.476364  | 0.935914  | 1.000      |
| 470 GOBP-REGULATION-OF-BODY-FLUID-LEVELS              | GO-0050878    | 11   | -0.358285 | -1.001766 | 0.459900  | 0.931155  | 1.000      |

Continuation of Table S6

|     | NAME                                               | ID            | SIZE | ES        | NES       | NOM.p.val | FDR.q.val | FWER.p.val |
|-----|----------------------------------------------------|---------------|------|-----------|-----------|-----------|-----------|------------|
| 471 | GOBP-REGULATION-OF-ORGANELLE-ORGANIZATION          | GO-0033043    | 14   | -0.337447 | -1.009621 | 0.456368  | 0.914225  | 1.000      |
| 472 | GOBP-FORBRAIN-DEVELOPMENT                          | GO-0030900    | 10   | -0.363096 | -1.009999 | 0.443717  | 0.916850  | 1.000      |
| 473 | GOBP-RESPONSE-TO-CALCIUMION                        | GO-0051592    | 6    | -0.434349 | -1.011688 | 0.462888  | 0.915767  | 1.000      |
| 474 | GOBP-ENDOCYTOSIS                                   | GO-006897     | 8    | -0.390666 | -1.012205 | 0.437077  | 0.918035  | 1.000      |
| 475 | GOBP-CIRCULATORY-SYSTEM-PROCESS                    | GO-0003013    | 5    | -0.455637 | -1.012989 | 0.448324  | 0.919609  | 1.000      |
| 476 | GOBP-LONG-TERM-MEMORY                              | GO-0007616    | 6    | -0.428579 | -1.014406 | 0.460598  | 0.919684  | 1.000      |
| 477 | GOBP-REGULATION-OF-CELL-PROJECTION-ORGANIZATION    | GO-0031344    | 20   | -0.306969 | -1.015699 | 0.458810  | 0.919795  | 1.000      |
| 478 | GOBP-MUSCLE-ORGAN-DEVELOPMENT                      | GO-0007517    | 9    | -0.373736 | -1.017243 | 0.448539  | 0.919383  | 1.000      |
| 479 | GOBP-RHYTHMIC-PROCESS                              | GO-0048511    | 15   | -0.329280 | -1.017999 | 0.446321  | 0.921172  | 1.000      |
| 480 | GOBP-MYELOID-LEUKOCYTE-MEDIATED-IMMUNITY           | GO-0002444    | 6    | -0.423572 | -1.020413 | 0.418157  | 0.918178  | 1.000      |
| 481 | REACTOME-EXTRA-NUCLEAR-ESTROGEN-SIGNALING          | R-RNO-9009391 | 7    | -0.412487 | -1.029199 | 0.421265  | 0.898100  | 1.000      |
| 482 | GOBP-RESPONSE-TO-NICOTINE                          | GO-0035094    | 7    | -0.416515 | -1.031457 | 0.438896  | 0.895573  | 1.000      |
| 483 | GOBP-TAXIS                                         | GO-0042330    | 14   | -0.339898 | -1.031632 | 0.431373  | 0.898782  | 1.000      |
| 484 | GOBP-REGULATION-OF-HORMONE-LEVELS                  | GO-0010817    | 12   | -0.355650 | -1.034795 | 0.404177  | 0.893870  | 1.000      |
| 485 | GOBP-SEXUAL-REPRODUCTION                           | GO-0019953    | 10   | -0.382210 | -1.040402 | 0.419562  | 0.882369  | 1.000      |
| 486 | GOBP-REGULATION-OF-SYNAPSE-STRUCTURE-OR-ACTIVITY   | GO-0050803    | 11   | -0.368234 | -1.041782 | 0.404337  | 0.882305  | 1.000      |
| 487 | GOBP-SYNAPSE-ORGANIZATION                          | GO-0050808    | 17   | -0.330055 | -1.043274 | 0.426887  | 0.881915  | 1.000      |
| 488 | REACTOME-ESR-MEDIATED-SIGNALING                    | R-RNO-8939211 | 8    | -0.406189 | -1.045433 | 0.425560  | 0.879882  | 1.000      |
| 489 | GOBP-MULTICELLULAR-ORGANISM-REPRODUCTION           | GO-0032504    | 12   | -0.364483 | -1.047045 | 0.435961  | 0.879185  | 1.000      |
| 490 | REACTOME-ANTIINFLAMMATORY-RESPONSE-FAVOURING....   | R-HSA-9662851 | 5    | -0.476903 | -1.047365 | 0.411189  | 0.882081  | 1.000      |
| 491 | HALLMARK-UV-RESPONSE-UP                            | M5941         | 5    | -0.471416 | -1.049798 | 0.393162  | 0.878957  | 1.000      |
| 492 | GOBP-PROTEIN-COMPLEX-OLIGOMERIZATION               | GO-0051259    | 7    | -0.431281 | -1.056544 | 0.392438  | 0.864300  | 1.000      |
| 493 | GOBP-REGULATION-OF-SYSTEM-PROCESS                  | GO-0044057    | 18   | -0.335132 | -1.060573 | 0.418632  | 0.856998  | 1.000      |
| 494 | GOBP-POSITIVE-REGULATION-OF-CELLULAR-PROTEIN-L...  | GO-1903829    | 7    | -0.430259 | -1.062730 | 0.387399  | 0.854927  | 1.000      |
| 495 | GOBP-PURINE-CONTAINING-COMPOUND-METABOLIC-PROCESS  | GO-0072521    | 6    | -0.447672 | -1.064219 | 0.372093  | 0.854615  | 1.000      |
| 496 | GOBP-REGULATION-OF-LONG-TERM-SYNAPTIC-POTENTIAL... | GO-1900271    | 6    | -0.455590 | -1.064681 | 0.401907  | 0.857136  | 1.000      |
| 497 | GOBP-RESPONSE-TO-STARVATION                        | GO-0042594    | 5    | -0.481524 | -1.065815 | 0.359661  | 0.857811  | 1.000      |
| 498 | REACTOME-SIGNALING-BY-NUCLEAR-RECEPTORS            | R-RNO-9006931 | 8    | -0.406189 | -1.066692 | 0.404539  | 0.859151  | 1.000      |
| 499 | REACTOME-PLATELET-ACTIVATION-SIGNALING-AND-AGG...  | R-HSA-76002   | 7    | -0.427030 | -1.068083 | 0.389543  | 0.858916  | 1.000      |
| 500 | GOBP-MULTICELLULAR-ORGANISMAL-RESPONSE-TO-STRESS   | GO-0033555    | 5    | -0.485190 | -1.070182 | 0.385359  | 0.856954  | 1.000      |
| 501 | GOBP-REGULATION-OF-PEPTIDE-SECRETION               | GO-0002791    | 7    | -0.437874 | -1.070351 | 0.357616  | 0.860265  | 1.000      |
| 502 | GOBP-CELLULAR-RESPONSE-TO-STARVATION               | GO-0009267    | 5    | -0.481524 | -1.075573 | 0.373427  | 0.849126  | 1.000      |
| 503 | GOBP-PROTEIN-LOCALIZATION-TO-POSTSYNAPSE           | GO-0062237    | 5    | -0.486396 | -1.076414 | 0.375000  | 0.850703  | 1.000      |
| 504 | GOBP-REGULATION-OF-PEPTIDE-HORMONE-SECRETION       | GO-0090276    | 6    | -0.466019 | -1.082574 | 0.380223  | 0.837103  | 1.000      |
| 505 | REACTOME-CELLULAR-RESPONSES-TO-EXTERNAL-STIMULI    | R-RNO-8953897 | 11   | -0.384844 | -1.086205 | 0.361461  | 0.830562  | 1.000      |
| 506 | GOBP-PROTEIN-LOCALIZATION-TO-SYNAPSE               | GO-0035418    | 5    | -0.486396 | -1.086572 | 0.337838  | 0.833343  | 1.000      |
| 507 | GOBP-ORGANIC-HYDROXY-COMPOUND-TRANSPORT            | GO-0015850    | 6    | -0.456118 | -1.096272 | 0.348361  | 0.810120  | 1.000      |
| 508 | GOBP-POSITIVE-REGULATION-OF-TRANSPORT              | GO-0051050    | 26   | -0.322156 | -1.099127 | 0.356902  | 0.805588  | 1.000      |
| 509 | GOBP-REGULATION-OF-PROTEIN-LOCALIZATION            | GO-0032880    | 18   | -0.340102 | -1.100017 | 0.345828  | 0.806796  | 1.000      |
| 510 | GOBP-RESPONSE-TO-RADIATION                         | GO-0009314    | 13   | -0.372167 | -1.100361 | 0.353960  | 0.809677  | 1.000      |
| 511 | GOBP-REGULATION-OF-NERVOUS-SYSTEM-PROCESS          | GO-0031644    | 8    | -0.431106 | -1.101088 | 0.364362  | 0.811578  | 1.000      |
| 512 | GOBP-MUSCLE-TISSUE-DEVELOPMENT                     | GO-0060537    | 11   | -0.388900 | -1.101206 | 0.340768  | 0.814972  | 1.000      |
| 513 | GOBP-EMBRYONIC-MORPHOGENESIS                       | GO-0048598    | 6    | -0.466873 | -1.106211 | 0.319120  | 0.804618  | 1.000      |

Continuation of Table S6

|     | NAME                                              | ID            | SIZE | ES        | NES       | NOM.p.val | FDR.q.val | FWER.p.val |
|-----|---------------------------------------------------|---------------|------|-----------|-----------|-----------|-----------|------------|
| 514 | GOBP-LEUKOCYTE-MEDIATED-IMMUNITY                  | GO-0002443    | 8    | -0.430891 | -1.108912 | 0.320704  | 0.800405  | 1.000      |
| 515 | GOBP-MULTIORGANISM-PROCESS                        | GO-0051704    | 16   | -0.346949 | -1.110369 | 0.336574  | 0.800216  | 1.000      |
| 516 | GOBP-ENDOMEMBRANE-SYSTEM-ORGANIZATION             | GO-0010256    | 6    | -0.471879 | -1.117926 | 0.340483  | 0.783414  | 1.000      |
| 517 | GOBP-REGULATION-OF-INTRACELLULAR-SIGNAL-TRANS...  | GO-1902531    | 21   | -0.336651 | -1.118902 | 0.336009  | 0.784286  | 1.000      |
| 518 | REACTOME-ESTROGEN-DEPENDENT-NUCLEAR-EVENTS-DOW... | R-RNO-9634638 | 5    | -0.500880 | -1.120538 | 0.307153  | 0.783573  | 1.000      |
| 519 | GOBP-RESPONSE-TO-DRUG                             | GO-0042493    | 11   | -0.396257 | -1.122134 | 0.311111  | 0.782897  | 1.000      |
| 520 | GOBP-POSITIVE-REGULATION-OF-MAPK-CASCADE          | GO-0043410    | 9    | -0.428237 | -1.126885 | 0.317889  | 0.773680  | 1.000      |
| 521 | GOBP-CELLULAR-RESPONSE-TO-ALCOHOL                 | GO-0097306    | 5    | -0.502900 | -1.127052 | 0.310000  | 0.777029  | 1.000      |
| 522 | GOBP-POSITIVE-REGULATION-OF-INTRACELLULAR-SIGN... | GO-1902533    | 14   | -0.373160 | -1.127839 | 0.303030  | 0.778727  | 1.000      |
| 523 | GOBP-MEMORY                                       | GO-0007613    | 13   | -0.384815 | -1.128180 | 0.321696  | 0.781634  | 1.000      |
| 524 | GOBP-DENDRITIC-SPINE-MORPHOGENESIS                | GO-0060997    | 5    | -0.514852 | -1.131873 | 0.296296  | 0.774994  | 1.000      |
| 525 | GOBP-REGULATION-OF-PEPTIDASE-ACTIVITY             | GO-0052547    | 10   | -0.412740 | -1.136852 | 0.309278  | 0.765023  | 1.000      |
| 526 | GOBP-POSITIVE-REGULATION-OF-HYDROLASE-ACTIVITY    | GO-0051345    | 16   | -0.364479 | -1.138746 | 0.296117  | 0.763032  | 1.000      |
| 527 | GOBP-ACTIVATION-OF-MAPK-ACTIVITY                  | GO-0000187    | 6    | -0.493880 | -1.155529 | 0.247191  | 0.720409  | 1.000      |
| 528 | GOBP-POSITIVE-REGULATION-OF-MAP-KINASE-ACTIVITY   | GO-0043406    | 6    | -0.493880 | -1.157169 | 0.291287  | 0.719448  | 1.000      |
| 529 | GOBP-ERK1-AND-ERK2-CASCADE                        | GO-0070371    | 5    | -0.519507 | -1.160664 | 0.270572  | 0.713768  | 1.000      |
| 530 | GOBP-NEGATIVE-REGULATION-OF-CELL-CYCLE            | GO-0045786    | 5    | -0.520457 | -1.160783 | 0.268428  | 0.717071  | 1.000      |
| 531 | GOBP-ANION-TRANSMEMBRANE-TRANSPORT                | GO-0098656    | 7    | -0.467998 | -1.166148 | 0.261905  | 0.705939  | 1.000      |
| 532 | REACTOME-RNA-POLYMERASE-III-TRANSCRIPTION         | R-RNO-73857   | 20   | -0.359391 | -1.171689 | 0.247059  | 0.694306  | 1.000      |
| 533 | GOBP-POSITIVE-REGULATION-OF-LONG-TERM-SYNAPTIC... | GO-1900273    | 5    | -0.522369 | -1.173691 | 0.266667  | 0.692472  | 1.000      |
| 534 | GOBP-CELLULAR-COMPONENT-MORPHOGENESIS             | GO-0032989    | 25   | -0.345047 | -1.174357 | 0.265143  | 0.694275  | 1.000      |
| 535 | REACTOME-MAPK-TARGETS-NUCLEAR-EVENTS-MEDIATED...  | R-HSA-450282  | 5    | -0.528385 | -1.176755 | 0.267908  | 0.691302  | 1.000      |
| 536 | GOBP-CELL-PART-MORPHOGENESIS                      | GO-0032990    | 25   | -0.345047 | -1.179801 | 0.267717  | 0.686362  | 1.000      |
| 537 | REACTOME-DEVELOPMENTAL-BIOLOGY                    | R-RNO-1266738 | 22   | -0.354981 | -1.183012 | 0.260718  | 0.681095  | 1.000      |
| 538 | GOBP-CELL-MORPHOGENESIS                           | GO-0009092    | 25   | -0.345047 | -1.184609 | 0.251995  | 0.680333  | 1.000      |
| 539 | GOBP-REGULATION-OF-PEPTIDE-TRANSPORT              | GO-0090087    | 10   | -0.431972 | -1.188118 | 0.246787  | 0.674382  | 1.000      |
| 540 | GOBP-CELL-CYCLE-PROCESS                           | GO-0022402    | 11   | -0.422034 | -1.189070 | 0.237611  | 0.675377  | 1.000      |
| 541 | GOBP-CELL-MORPHOGENESIS-INVOLVED-IN-NEURON-DIF... | GO-0048667    | 22   | -0.358398 | -1.189309 | 0.254023  | 0.678480  | 1.000      |
| 542 | GOBP-POSITIVE-REGULATION-OF-CELL-DEATH            | GO-0010942    | 19   | -0.363029 | -1.190170 | 0.248235  | 0.679958  | 1.000      |
| 543 | GOBP-PROTEIN-LOCALIZATION-TO-ORGANELLE            | GO-0033365    | 8    | -0.467929 | -1.193822 | 0.236041  | 0.673191  | 1.000      |
| 544 | GOBP-RESPIRATORY-SYSTEM-DEVELOPMENT               | GO-0060541    | 6    | -0.511778 | -1.195323 | 0.221289  | 0.672861  | 1.000      |
| 545 | REACTOME-SIGNALING-BY-WNT                         | R-RNO-195721  | 7    | -0.482202 | -1.196352 | 0.238411  | 0.673670  | 1.000      |
| 546 | GOBP-CELL-MORPHOGENESIS-INVOLVED-IN-DIFFERENTI... | GO-0000904    | 22   | -0.358398 | -1.199990 | 0.244521  | 0.667177  | 1.000      |
| 547 | GOBP-SKELETAL-MUSCLE-ORGAN-DEVELOPMENT            | GO-0060538    | 5    | -0.536128 | -1.200111 | 0.226891  | 0.670538  | 1.000      |
| 548 | GOBP-RESPONSE-TO-ALKALOID                         | GO-0043279    | 5    | -0.538151 | -1.200167 | 0.216066  | 0.674179  | 1.000      |
| 549 | GOBP-CALCIUM-MEDIATED-SIGNALING                   | GO-0019722    | 10   | -0.438828 | -1.200591 | 0.243073  | 0.676715  | 1.000      |
| 550 | GOBP-MITOCHONDRION-ORGANIZATION                   | GO-0007005    | 7    | -0.484528 | -1.201357 | 0.236000  | 0.678484  | 1.000      |
| 551 | REACTOME-POST-TRANSLATIONAL-PROTEIN-MODIFICATION  | R-RNO-597592  | 7    | -0.489380 | -1.201414 | 0.218543  | 0.682158  | 1.000      |
| 552 | GOBP-REGULATION-OF-MAP-KINASE-ACTIVITY            | GO-0043405    | 9    | -0.453353 | -1.202411 | 0.240602  | 0.683376  | 1.000      |
| 553 | GOBP-CELLULAR-MACROMOLECULE-LOCALIZATION          | GO-0070727    | 20   | -0.365628 | -1.204134 | 0.224277  | 0.682272  | 1.000      |
| 554 | GOBP-POSITIVE-REGULATION-OF-PROTEIN-METABOLISM... | GO-0051247    | 27   | -0.345549 | -1.205970 | 0.243820  | 0.681016  | 1.000      |
| 555 | REACTOME-INTEGRATION-OF-ENERGY-METABOLISM         | R-RNO-163685  | 5    | -0.542169 | -1.209384 | 0.240331  | 0.675202  | 1.000      |
| 556 | GOBP-TELENCEPHALON-DEVELOPMENT                    | GO-0021537    | 7    | -0.483254 | -1.210240 | 0.220028  | 0.676509  | 1.000      |

Continuation of Table S6

| NAME                                               | ID            | SIZE | ES        | NES       | NOM.p.val | FDR.q.val | FWER.p.val |
|----------------------------------------------------|---------------|------|-----------|-----------|-----------|-----------|------------|
| GOBP-PROTEIN_LOCALIZATION_TO_MEMBRANE              | GO-0072657    | 13   | -0.412578 | -1.215876 | 0.232360  | 0.664307  | 1.000      |
| GOBP-REGULATION_OF_TRANSMEMBRANE_TRANSPORT         | GO-0034762    | 23   | -0.357250 | -1.218218 | 0.227950  | 0.661669  | 1.000      |
| GOBP-ADENYLATE_CYCLASE_INHIBITING_G_PROTEIN_CO...  | GO-0007196    | 5    | -0.554022 | -1.220394 | 0.220816  | 0.659065  | 1.000      |
| GOBP-POSITIVE_REGULATION_OF_PROTEOLYSIS            | GO-0045862    | 8    | -0.475030 | -1.220790 | 0.232558  | 0.661975  | 1.000      |
| GOBP-PROTEIN_LOCALIZATION_TO_PLASMA_MEMBRANE       | GO-0072659    | 7    | -0.500420 | -1.223316 | 0.207622  | 0.659066  | 1.000      |
| GOBP-INSULIN_SECRETION                             | GO-0030073    | 7    | -0.494120 | -1.224552 | 0.221614  | 0.659684  | 1.000      |
| GOBP-CELLULAR_COMPONENT_MAINTENANCE                | GO-0043954    | 5    | -0.544998 | -1.224787 | 0.209497  | 0.663032  | 1.000      |
| GOBP-EPITHELIAL_CELL_DIFFERENTIATION               | GO-0030855    | 7    | -0.497576 | -1.228931 | 0.201847  | 0.655568  | 1.000      |
| GOBP-POSITIVE_REGULATION_OF_PEPTIDASE_ACTIVITY     | GO-0010952    | 7    | -0.506670 | -1.230211 | 0.194444  | 0.656014  | 1.000      |
| GOBP-REGULATION_OF_MUSCLE_ADAPTATION               | GO-0043502    | 5    | -0.550733 | -1.233226 | 0.196453  | 0.651259  | 1.000      |
| GOBP-REGULATION_OF_POSTSYNAPSE_ORGANIZATION        | GO-0099175    | 6    | -0.524672 | -1.233911 | 0.201072  | 0.653392  | 1.000      |
| GOBP-REGULATION_OF_CYSSTEINE_TYPE_ENDOPEPTIDASE... | GO-2000116    | 9    | -0.459510 | -1.234881 | 0.200782  | 0.654676  | 1.000      |
| GOBP-CELLULAR_RESPONSE_TO_INORGANIC_SUBSTANCE      | GO-0071241    | 11   | -0.440201 | -1.238110 | 0.191011  | 0.649599  | 1.000      |
| GOBP-NEURON_DIFFERENTIATION                        | GO-0030182    | 37   | -0.345350 | -1.239698 | 0.214597  | 0.649013  | 1.000      |
| GOBP-MUSCLE_ADAPTATION                             | GO-0043500    | 5    | -0.550733 | -1.241769 | 0.186969  | 0.647111  | 1.000      |
| GOBP-ESTABLISHMENT_OF_PROTEIN_LOCALIZATION         | GO-0045184    | 17   | -0.396998 | -1.242524 | 0.197430  | 0.649090  | 1.000      |
| GOBP-CHEMICAL_SYNAPTIC_TRANSMISSION_POSTSYNAPTIC   | GO-0099565    | 9    | -0.462464 | -1.244061 | 0.199224  | 0.649076  | 1.000      |
| GOBP-REGULATION_OF_SYNAPTIC_TRANSMISSION_GLUTA...  | GO-0051966    | 12   | -0.436316 | -1.247869 | 0.214724  | 0.642536  | 1.000      |
| GOBP-ORGANOPHOSPHATE_METABOLIC_PROCESS             | GO-0019637    | 8    | -0.485329 | -1.252971 | 0.182529  | 0.632291  | 1.000      |
| GOBP-DENDRITE_DEVELOPMENT                          | GO-0016358    | 10   | -0.453225 | -1.253528 | 0.186352  | 0.634851  | 1.000      |
| GOBP-REGULATION_OF_MAPK_CASCADE                    | GO-0043408    | 13   | -0.418682 | -1.254315 | 0.186585  | 0.636952  | 1.000      |
| GOBP-PEPTIDE_HORMONE_SECRETION                     | GO-0030072    | 7    | -0.494120 | -1.256270 | 0.206494  | 0.635683  | 1.000      |
| REACTOME_BETA_CATENIN_INDEPENDENT_WNT_SIGNALING    | R-RNO-3858494 | 5    | -0.566205 | -1.256370 | 0.188406  | 0.639779  | 1.000      |
| GOBP-TEMPERATURE_HOMEOSTASIS                       | GO-0001659    | 5    | -0.560088 | -1.259294 | 0.174221  | 0.635855  | 1.000      |
| GOBP-GLIOGENESIS                                   | GO-0042063    | 12   | -0.437677 | -1.262367 | 0.169118  | 0.631376  | 1.000      |
| REACTOME_CLASS_C_3_METABOTROPIC_GLUTAMATE_PHER...  | R-RNO-420499  | 7    | -0.507326 | -1.266290 | 0.177866  | 0.624270  | 1.000      |
| GOBP-POSITIVE_REGULATION_OF_CYSSTEINE_TYPE_ENDO... | GO-2001056    | 7    | -0.506670 | -1.271326 | 0.184426  | 0.614429  | 1.000      |
| GOBP-TRANSMEMBRANE_TRANSPORT                       | GO-0055085    | 27   | -0.361807 | -1.275317 | 0.158427  | 0.607070  | 1.000      |
| GOBP-PROTEIN_LOCALIZATION_TO_CELL_PERIPHERY        | GO-1990778    | 12   | -0.443422 | -1.276364 | 0.171569  | 0.608608  | 1.000      |
| GOBP-CELLULAR_RESPONSE_TO_CADMIUM_ION              | GO-0071276    | 5    | -0.577965 | -1.279612 | 0.150815  | 0.603532  | 1.000      |
| GOBP-REGULATION_OF_METAL_ION_TRANSPORT             | GO-0010959    | 6    | -0.544639 | -1.280391 | 0.149254  | 0.605753  | 1.000      |
| GOBP-AXON_DEVELOPMENT                              | GO-0061564    | 18   | -0.504585 | -1.282507 | 0.164269  | 0.603810  | 1.000      |
| GOBP-MYELOID_LEUKOCYTE_ACTIVATION                  | GO-0002274    | 8    | -0.504585 | -1.282507 | 0.163030  | 0.596468  | 1.000      |
| GOBP-POSITIVE_REGULATION_OF_NEURON_DEATH           | GO-1901216    | 5    | -0.567978 | -1.293057 | 0.147383  | 0.582467  | 1.000      |
| GOBP-DEVELOPMENTAL_MATURATION                      | GO-0021700    | 5    | -0.58263  | -1.299380 | 0.156425  | 0.596658  | 1.000      |
| GOBP-PROTEIN_TETRAMERIZATION                       | GO-0051262    | 5    | -0.582145 | -1.307806 | 0.135246  | 0.550919  | 1.000      |
| REACTOME_G_ALPHA_Q_SIGNALING_EVENTS                | R-RNO-416476  | 6    | -0.557530 | -1.310865 | 0.142259  | 0.546887  | 1.000      |
| GOBP-CELL_SURFACE_RECEPTOR_SIGNALING_PATHWAY_I...  | R-1905114     | 15   | -0.420965 | -1.317332 | 0.142518  | 0.533561  | 1.000      |
| GOBP-REGULATION_OF_HORMONE_SECRETION               | GO-0046883    | 8    | -0.516624 | -1.335001 | 0.122876  | 0.491102  | 1.000      |
| GOBP-REGULATION_OF_TRANSPORTER_ACTIVITY            | GO-0032409    | 17   | -0.423584 | -1.335864 | 0.134118  | 0.492576  | 1.000      |
| GOBP-POSITIVE_REGULATION_OF_MOLECULAR_FUNCTION     | GO-0044093    | 37   | -0.368582 | -1.339329 | 0.138239  | 0.487289  | 1.000      |
| GOBP-ORGANOPHOSPHATE_BIOSYNTHETIC_PROCESS          | GO-0090407    | 5    | -0.604715 | -1.343017 | 0.105263  | 0.481612  | 1.000      |
| GOBP-PEPTIDE_SECRETION                             | GO-0002790    | 9    | -0.498265 | -1.343548 | 0.120000  | 0.484215  | 1.000      |



Continuation of Table S6

|     | NAME                                              | ID            | SIZE | ES        | NES       | NOM.p.val | FDR.q.val | FWER.p.val |
|-----|---------------------------------------------------|---------------|------|-----------|-----------|-----------|-----------|------------|
| 600 | GOBP-FATTY-ACID-TRANSPORT                         | GO-0015908    | 6    | -0.565687 | -1.343981 | 0.120596  | 0.486915  | 1.000      |
| 601 | GOBP-POSTSYNAPSE.ORGANIZATION                     | GO-0099173    | 10   | -0.496171 | -1.344516 | 0.121437  | 0.489366  | 1.000      |
| 602 | GOBP-ORGANIC-ACID-TRANSPORT                       | GO-0015849    | 7    | -0.543054 | -1.347476 | 0.107143  | 0.485777  | 1.000      |
| 603 | GOBP-NUCLEOSIDE-PHOSPHATE-BIOSYNTHETIC-PROCESS    | GO-1901293    | 5    | -0.604715 | -1.353237 | 0.106145  | 0.474708  | 1.000      |
| 604 | GOBP-G-PROTEIN-COUPLED-GLUTAMATE-RECEPTOR-SIGN... | GO-0007216    | 8    | -0.523834 | -1.353774 | 0.120823  | 0.477042  | 1.000      |
| 605 | GOBP-NUCLEOBASE-CONTAINING-SMALL-MOLECULE-META... | GO-0055086    | 7    | -0.555078 | -1.354543 | 0.110067  | 0.479075  | 1.000      |
| 606 | GOBP-MULTI-MULTICELLULAR-ORGANISM-PROCESS         | GO-0004706    | 8    | -0.52736  | -1.356030 | 0.115681  | 0.479252  | 1.000      |
| 607 | GOBP-SYNAPTIC-TRANSMISSION-GLUTAMATERGIC          | GO-0035249    | 13   | -0.456545 | -1.362213 | 0.117429  | 0.467853  | 1.000      |
| 608 | GOBP-CELL-PROJECTION-ORGANIZATION                 | GO-0030030    | 35   | -0.373087 | -1.362311 | 0.111849  | 0.471638  | 1.000      |
| 609 | REACTOME-GPCR-LIGAND-BINDING                      | R-RNO-500792  | 8    | -0.525887 | -1.367952 | 0.094148  | 0.461421  | 1.000      |
| 610 | REACTOME-G-ALPHA-Z-SIGNALING-EVENTS               | R-RNO-118597  | 5    | -0.609410 | -1.372797 | 0.091938  | 0.453698  | 1.000      |
| 611 | GOBP-POSITIVE-REGULATION-OF-SECRETION             | GO-0051047    | 6    | -0.575026 | -1.372858 | 0.094595  | 0.457443  | 1.000      |
| 612 | GOBP-DICARBOXYLIC-ACID-TRANSPORT                  | GO-0006835    | 5    | -0.624967 | -1.373425 | 0.083333  | 0.460011  | 1.000      |
| 613 | GOBP-MEMBRANE-ORGANIZATION                        | GO-0061024    | 12   | -0.475936 | -1.377446 | 0.088418  | 0.453678  | 1.000      |
| 614 | GOBP-GLIAL-CELL-DIFFERENTIATION                   | GO-0010001    | 10   | -0.501228 | -1.380678 | 0.094994  | 0.449515  | 1.000      |
| 615 | REACTOME-L1CAM-INTERACTIONS                       | R-RNO-373760  | 7    | -0.628147 | -1.382939 | 0.090909  | 0.447854  | 1.000      |
| 616 | GOBP-DENDRITE-MORPHOGENESIS                       | GO-0048813    | 5    | -0.554950 | -1.383141 | 0.095176  | 0.451488  | 1.000      |
| 617 | REACTOME-EPH-EPHRIN-SIGNALING                     | R-RNO-2682334 | 6    | -0.582873 | -1.383299 | 0.102180  | 0.455286  | 1.000      |
| 618 | GOBP-SECRETION                                    | GO-0046903    | 24   | -0.409581 | -1.383696 | 0.109070  | 0.458414  | 1.000      |
| 619 | GOBP-ACIDIC-AMINO-ACID-TRANSPORT                  | GO-0015800    | 5    | -0.624947 | -1.384145 | 0.090014  | 0.461625  | 1.000      |
| 620 | GOBP-DENDRITIC-SPINE-DEVELOPMENT                  | GO-0060996    | 6    | -0.576691 | -1.388516 | 0.106901  | 0.454838  | 1.000      |
| 621 | GOBP-NEURON-DEVELOPMENT                           | GO-0048666    | 34   | -0.385072 | -1.388806 | 0.098324  | 0.458369  | 1.000      |
| 622 | GOBP-AMINO-ACID-TRANSPORT                         | GO-0006865    | 6    | -0.597876 | -1.392111 | 0.083221  | 0.454392  | 1.000      |
| 623 | GOBP-CARBOXYLIC-ACID-TRANSPORT                    | GO-0046942    | 6    | -0.597876 | -1.395719 | 0.093623  | 0.449473  | 1.000      |
| 624 | GOBP-HORMONE-TRANSPORT                            | GO-0009914    | 9    | -0.534973 | -1.396604 | 0.088083  | 0.451522  | 1.000      |
| 625 | GOBP-CALCIUM-ION-TRANSMEMBRANE-TRANSPORT          | GO-0070588    | 7    | -0.573322 | -1.396796 | 0.084100  | 0.455509  | 1.000      |
| 626 | GOBP-SENSORY-ORGAN-DEVELOPMENT                    | GO-0007423    | 8    | -0.539262 | -1.400108 | 0.101935  | 0.451501  | 1.000      |
| 627 | GOBP-MONOCARBOXYLIC-ACID-TRANSPORT                | GO-0015718    | 5    | -0.624947 | -1.400890 | 0.084469  | 0.454094  | 1.000      |
| 628 | REACTOME-DAG-AND-IP3-SIGNALING                    | R-RNO-1489509 | 8    | -0.545640 | -1.401913 | 0.079470  | 0.456195  | 1.000      |
| 629 | GOBP-EXOCYTOSIS                                   | GO-0006887    | 11   | -0.490628 | -1.407056 | 0.082174  | 0.447395  | 1.000      |
| 630 | GOBP-NEURON-PROJECTION-ORGANIZATION               | GO-0106027    | 8    | -0.551982 | -1.407599 | 0.089032  | 0.450853  | 1.000      |
| 631 | REACTOME-MAPK-FAMILY-SIGNALING-CASCADES           | R-RNO-5683057 | 12   | -0.482904 | -1.411985 | 0.079807  | 0.444243  | 1.000      |
| 632 | GOBP-CYTOSOLIC-CALCIUM-ION-TRANSPORT              | GO-0060401    | 7    | -0.573322 | -1.414494 | 0.077446  | 0.443097  | 1.000      |
| 633 | GOBP-REGULATION-OF-ION-TRANSPORT                  | GO-0043269    | 36   | -0.389808 | -1.417684 | 0.089305  | 0.440361  | 1.000      |
| 634 | GOBP-CATION-TRANSMEMBRANE-TRANSPORT               | GO-0098655    | 18   | -0.439388 | -1.419000 | 0.081395  | 0.441844  | 1.000      |
| 635 | GOBP-ORGANIC-ANION-TRANSPORT                      | GO-0015711    | 6    | -0.597876 | -1.421787 | 0.073370  | 0.439285  | 1.000      |
| 636 | GOBP-HOMEOSTATIC-PROCESS                          | GO-0042592    | 31   | -0.398999 | -1.422121 | 0.071429  | 0.443275  | 1.000      |
| 637 | GOBP-INORGANIC-ION-TRANSMEMBRANE-TRANSPORT        | GO-0098660    | 9    | -0.527261 | -1.425988 | 0.062262  | 0.438213  | 1.000      |
| 638 | GOBP-CELLULAR-HOMEOSTASIS                         | GO-0019725    | 18   | -0.449661 | -1.426856 | 0.072941  | 0.440681  | 1.000      |
| 639 | REACTOME-NEUROUS-SYSTEM-DEVELOPMENT               | R-RNO-9675108 | 14   | -0.475167 | -1.428879 | 0.065296  | 0.440114  | 1.000      |
| 640 | GOBP-CALCIUM-ION-TRANSPORT                        | GO-0006816    | 11   | -0.502948 | -1.429027 | 0.076826  | 0.445039  | 1.000      |
| 641 | REACTOME-TRANSCRIPTIONAL-REGULATION_BY_MECP2      | R-RNO-8986944 | 7    | -0.582810 | -1.429380 | 0.063325  | 0.449413  | 1.000      |
| 642 | GOBP-MONOAMINE-TRANSPORT                          | GO-0015844    | 5    | -0.645358 | -1.434131 | 0.065278  | 0.443499  | 1.000      |

Continuation of Table S6

|     | NAME                                               | ID            | SIZE | ES        | NES       | NOM.p.val | FDR.q.val | FWER.p.val |
|-----|----------------------------------------------------|---------------|------|-----------|-----------|-----------|-----------|------------|
| 643 | GOBP-IONOTROPIC-GLUTAMATE-RECEPTOR-SIGNALING.P...  | GO-0035235    | 9    | -0.537666 | -1.437174 | 0.070000  | 0.440229  | 1.000      |
| 644 | GOBP-REGULATION-OF-VESICLE-MEDIATED-TRANSPORT      | GO-0060627    | 12   | -0.495908 | -1.437770 | 0.078205  | 0.444267  | 1.000      |
| 645 | GOBP-CALCIUM-ION-TRANSPORT-INTO-CYTOSOL            | GO-0060402    | 7    | -0.573322 | -1.438866 | 0.080537  | 0.446581  | 1.000      |
| 646 | GOBP-CHEMICAL-HOMEOSTASIS                          | GO-0048878    | 23   | -0.427048 | -1.439643 | 0.084296  | 0.450087  | 1.000      |
| 647 | GOBP-METAL-ION-TRANSPORT                           | GO-0030001    | 11   | -0.502948 | -1.440051 | 0.069853  | 0.454836  | 1.000      |
| 648 | GOBP-RESPONSE-TO-NITROGEN-COMPOUND                 | GO-1901698    | 35   | -0.406253 | -1.447275 | 0.076923  | 0.441411  | 1.000      |
| 649 | REACTOME-RAS-ACTIVATION-UPON-CA2-INFLUX-THROUGH... | R-HSA-442982  | 6    | -0.612042 | -1.457593 | 0.065246  | 0.420542  | 1.000      |
| 650 | GOBP-POSITIVE-REGULATION-OF-SIGNALING              | GO-0023056    | 34   | -0.406980 | -1.458933 | 0.062084  | 0.422360  | 1.000      |
| 651 | GOBP-LONG-TERM-SYNAPTIC-POTENTIATION               | GO-0060291    | 12   | -0.505580 | -1.469100 | 0.058096  | 0.402125  | 1.000      |
| 652 | GOBP-NEUROGENESIS                                  | GO-0022008    | 41   | -0.408275 | -1.473300 | 0.057047  | 0.396711  | 1.000      |
| 653 | GOBP-RESPONSE-TO-ABIOTIC-STIMULUS                  | GO-0009628    | 27   | -0.420002 | -1.473553 | 0.055866  | 0.401478  | 1.000      |
| 654 | GOBP-VESICLE-MEDIATED-TRANSPORT-IN-SYNAPSE         | GO-0099003    | 7    | -0.597739 | -1.476885 | 0.058124  | 0.398696  | 1.000      |
| 655 | GOBP-ADENYLATE-CYCLASE-INHIBITING-G-PROTEIN.CO...  | GO-0007193    | 9    | -0.553073 | -1.477594 | 0.073383  | 0.402464  | 1.000      |
| 656 | GOBP-EXCITATORY-CHEMICAL-SYNAPTIC-TRANSMISSION     | GO-0098976    | 5    | -0.674349 | -1.482913 | 0.043539  | 0.394982  | 1.000      |
| 657 | GOBP-REGULATION-OF-TRANSPORT                       | GO-0051049    | 44   | -0.409308 | -1.483467 | 0.060307  | 0.399382  | 1.000      |
| 658 | REACTOME-SYNAPTIC-ADHESION-LIKE-MOLECULES          | R-RNO-8849932 | 9    | -0.565946 | -1.493910 | 0.035202  | 0.378258  | 1.000      |
| 659 | REACTOME-TRAFFICKING-OF-GLUR2-CONTAINING-AMPA...   | R-RNO-416993  | 8    | -0.584130 | -1.494439 | 0.066225  | 0.382469  | 1.000      |
| 660 | GOBP-RESPONSE-TO-ALCOHOL                           | GO-0097305    | 11   | -0.532213 | -1.496157 | 0.055696  | 0.383915  | 1.000      |
| 661 | GOBP-METAL-ION-HOMEOSTASIS                         | GO-0055065    | 14   | -0.497848 | -1.499174 | 0.043742  | 0.382033  | 1.000      |
| 662 | GOBP-EPHRIN-RECEPTOR-SIGNALING-PATHWAY             | GO-0040403    | 5    | -0.674042 | -1.500579 | 0.046008  | 0.384492  | 1.000      |
| 663 | GOBP-POSITIVE-REGULATION-OF-CATALYTIC-ACTIVITY     | GO-0043085    | 29   | -0.441269 | -1.512506 | 0.043624  | 0.361039  | 1.000      |
| 664 | GOBP-REGULATION-OF-NEUROTRANSMITTER-LEVELS         | GO-0001505    | 7    | -0.617669 | -1.515815 | 0.041444  | 0.358831  | 1.000      |
| 665 | GOBP-NEUROTRANSMITTER-TRANSPORT                    | GO-0008636    | 7    | -0.617669 | -1.523413 | 0.037037  | 0.347095  | 1.000      |
| 666 | GOBP-LOCOMOTORY-BEHAVIOR                           | GO-0007626    | 8    | -0.578414 | -1.531450 | 0.042581  | 0.334641  | 1.000      |
| 667 | GOBP-MAPK-CASCADE                                  | GO-0000165    | 18   | -0.481307 | -1.532718 | 0.037209  | 0.337364  | 1.000      |
| 668 | GOBP-REGULATION-OF-POSTSYNAPTIC-MEMBRANE-POTEN...  | GO-0060078    | 14   | -0.510995 | -1.541737 | 0.035496  | 0.322805  | 1.000      |
| 669 | REACTOME-LONG-TERM-POTENTIATION                    | R-HSA-9620244 | 10   | -0.564724 | -1.545852 | 0.026718  | 0.319676  | 1.000      |
| 670 | GOBP-MATERNAL-PROCESS-INVOLVED-IN-FEMALE-PREGN...  | GO-0060135    | 5    | -0.689626 | -1.546167 | 0.033520  | 0.324773  | 1.000      |
| 671 | REACTOME-NEUREXINS-AND-NEUROLIGINS                 | R-RNO-6794361 | 9    | -0.583649 | -1.553540 | 0.023622  | 0.314913  | 1.000      |
| 672 | REACTOME-INTRACELLULAR-SIGNALING-BY-SECOND.MES...  | R-RNO-9006925 | 15   | -0.508988 | -1.557504 | 0.033175  | 0.312030  | 1.000      |
| 673 | GOBP-PROTEIN-CONTAINING-COMPLEX-SUBUNIT-ORGANI...  | GO-0043933    | 15   | -0.514730 | -1.562909 | 0.029976  | 0.305645  | 1.000      |
| 674 | GOBP-HEAD-DEVELOPMENT                              | GO-0060322    | 23   | -0.459542 | -1.562981 | 0.036047  | 0.311515  | 1.000      |
| 675 | GOBP-NEUROTRANSMITTER-SECRETION                    | GO-0007269    | 6    | -0.658537 | -1.573744 | 0.031662  | 0.294132  | 1.000      |
| 676 | REACTOME-NEGATIVE-REGULATION-OF-NMDA-RECEPTOR...   | R-HSA-961732  | 8    | -0.609517 | -1.581282 | 0.024485  | 0.283479  | 1.000      |
| 677 | REACTOME-ASSEMBLY-AND-CELL-SURFACE-PRESENTATIO...  | R-RNO-9609736 | 8    | -0.609517 | -1.58045  | 0.023316  | 0.281518  | 1.000      |
| 678 | REACTOME-PTEN-REGULATION                           | R-RNO-6807070 | 5    | -0.711373 | -1.589450 | 0.025956  | 0.278012  | 1.000      |
| 679 | GOBP-CENTRAL-NERVOUS-SYSTEM-DEVELOPMENT            | GO-0007417    | 27   | -0.459423 | -1.595509 | 0.017026  | 0.271078  | 1.000      |
| 680 | REACTOME-CA-DEPENDENT-EVENTS                       | R-RNO-111996  | 8    | -0.625000 | -1.605423 | 0.024235  | 0.256591  | 1.000      |
| 681 | GOBP-REGULATION-OF-MEMBRANE-POTENTIAL              | GO-0042391    | 17   | -0.504949 | -1.608057 | 0.025731  | 0.256983  | 1.000      |
| 682 | GOBP-ENDOCRINE-SYSTEM-DEVELOPMENT                  | GO-0035270    | 6    | -0.686349 | -1.614611 | 0.023035  | 0.249867  | 1.000      |
| 683 | GOBP-REGULATION-OF-CYTOSOLIC-CALCIUM-ION-CONCE...  | GO-0051480    | 13   | -0.548547 | -1.624236 | 0.020631  | 0.236795  | 1.000      |
| 684 | GOBP-DIVALENT-INORGANIC-CATION-HOMEOSTASIS         | GO-0072507    | 13   | -0.548547 | -1.626426 | 0.016867  | 0.238239  | 1.000      |
| 685 | GOBP-REGULATION-OF-CATION-TRANSMEMBRANE-TRANSPORT  | GO-1904062    | 16   | -0.522452 | -1.630347 | 0.020457  | 0.237078  | 1.000      |

Continuation of Table S6

| NAME | ID                                                | SIZE | ES        | NES       | NOM.p.val | FDR.q.val | FWER.p.val |
|------|---------------------------------------------------|------|-----------|-----------|-----------|-----------|------------|
| 686  | GOBP-ADENYLATE_CYCLASE-MODULATING-G-PROTEIN.CO... | 11   | -0.575197 | -1.631949 | 0.016049  | 0.239970  | 1.000      |
| 687  | GOBP-REGULATION-OF-NEURONAL-SYNAPTIC-PLASTICITY   | 7    | -0.671868 | -1.674084 | 0.006757  | 0.174043  | 0.998      |
| 688  | GOBP-ION-HOMEOSTASIS                              | 16   | -0.534390 | -1.674562 | 0.010883  | 0.177972  | 0.998      |
| 689  | REACTOME-OPIOID-SIGNALING                         | 12   | -0.578947 | -1.675804 | 0.016393  | 0.180725  | 0.998      |
| 690  | GOBP-REGULATION-OF-SECRETION                      | 14   | -0.552200 | -1.683909 | 0.007168  | 0.174410  | 0.997      |
| 691  | REACTOME-PROTEIN-PROTEIN-INTERACTIONS-AT-SYNAPSES | 12   | -0.587224 | -1.700171 | 0.011307  | 0.155660  | 0.994      |
| 692  | GOBP-COGNITION                                    | 28   | -0.488629 | -1.713015 | 0.009091  | 0.144083  | 0.992      |
| 693  | GOBP-REGULATION-OF-CATION-CHANNEL-ACTIVITY        | 14   | -0.574871 | -1.714200 | 0.013018  | 0.147328  | 0.991      |
| 694  | GOBP-ASSOCIATIVE-LEARNING                         | 7    | -0.490872 | -1.714581 | 0.006757  | 0.151709  | 0.991      |
| 695  | GOBP-NERVOUS-SYSTEM-PROCESS                       | 38   | -0.472666 | -1.715893 | 0.006593  | 0.155510  | 0.990      |
| 696  | REACTOME-G-PROTEIN-MEDIATED-EVENTS                | 9    | -0.632911 | -1.717259 | 0.007595  | 0.159273  | 0.989      |
| 697  | GOBP-G-PROTEIN-COUPLED-RECEPTOR-SIGNALING-PATHWAY | 18   | -0.547868 | -1.728097 | 0.014286  | 0.149059  | 0.981      |
| 698  | REACTOME-CREB1-PHOSPHORYLATION-THROUGH-NMDA.RE... | 8    | -0.667485 | -1.730324 | 0.006579  | 0.151196  | 0.979      |
| 699  | GOBP-CATION-TRANSPORT                             | 25   | -0.507066 | -1.732377 | 0.012687  | 0.154251  | 0.979      |
| 700  | GOBP-REGULATION-OF-SIGNALING-RECEPTOR-ACTIVITY    | 14   | -0.570295 | -1.734783 | 0.010856  | 0.156608  | 0.978      |
| 701  | GOBP-REGULATION-OF-NMDA-RECEPTOR-ACTIVITY         | 10   | -0.643207 | -1.738805 | 0.009988  | 0.157851  | 0.975      |
| 702  | GOBP-CELLULAR-ION-HOMEOSTASIS                     | 14   | -0.586959 | -1.749861 | 0.008373  | 0.148060  | 0.967      |
| 703  | GOBP-POSITIVE-REGULATION-OF-SYNAPTIC-TRANSMISSION | 15   | -0.568107 | -1.752610 | 0.006024  | 0.150662  | 0.961      |
| 704  | GOBP-GLUTAMATE-RECEPTOR-SIGNALING-PATHWAY         | 17   | -0.547291 | -1.760493 | 0.008304  | 0.146765  | 0.952      |
| 705  | GOBP-REGULATION-OF-NEUROTRANSMITTER-TRANSPORT     | 6    | -0.738216 | -1.764317 | 0.006729  | 0.149277  | 0.948      |
| 706  | REACTOME-UNBLOCKING-OF-NMDA-RECEPTORS-GLUTAMAT... | 12   | -0.603836 | -1.772242 | 0.004944  | 0.146428  | 0.940      |
| 707  | REACTOME-TRAFFICKING-OF-AMPA-RECEPTORS            | 11   | -0.612620 | -1.772307 | 0.010204  | 0.154563  | 0.940      |
| 708  | GOBP-REGULATION-OF-NEUROTRANSMITTER-RECEPTOR-A... | 13   | -0.605535 | -1.792867 | 0.002413  | 0.133359  | 0.903      |
| 709  | GOBP-SYNAPTIC-SIGNALING                           | 47   | -0.497587 | -1.819590 | 0.005507  | 0.110527  | 0.848      |
| 710  | GOBP-SIGNAL-RELEASE                               | 14   | -0.606604 | -1.826460 | 0.003745  | 0.110375  | 0.830      |
| 711  | GOBP-SENSORY-PERCEPTION-OF-PAIN                   | 5    | -0.821836 | -1.827264 | 0.002869  | 0.117237  | 0.829      |
| 712  | REACTOME-SIGNALING-BY-GPCR                        | 22   | -0.561404 | -1.850861 | 0.003501  | 0.098777  | 0.748      |
| 713  | GOBP-LEARNING                                     | 13   | -0.623505 | -1.856330 | 0.003676  | 0.100764  | 0.722      |
| 714  | GOBP-BEHAVIOR                                     | 33   | -0.524783 | -1.866342 | 0.002222  | 0.100165  | 0.687      |
| 715  | REACTOME-ACTIVATION-OF-NMDA-RECEPTORS-AND-POST... | 16   | -0.606031 | -1.902437 | 0.002331  | 0.075281  | 0.550      |
| 716  | GOBP-REGULATION-OF-SYNAPTIC-PLASTICITY            | 21   | -0.581217 | -1.925688 | 0.001145  | 0.063086  | 0.455      |
| 717  | REACTOME-G-ALPHA-I-SIGNALING-EVENTS               | 18   | -0.611447 | -1.954176 | 0.000000  | 0.051105  | 0.361      |
| 718  | GOBP-CELL-CELL-SIGNALING                          | 56   | -0.546936 | -1.970412 | 0.000000  | 0.047453  | 0.304      |
| 719  | GOBP-SENSORY-PERCEPTION                           | 9    | -0.748452 | -1.978668 | 0.001295  | 0.050751  | 0.278      |
| 720  | GOBP-REGULATION-OF-TRANS-SYNAPTIC-SIGNALING       | 40   | -0.550881 | -2.015969 | 0.000000  | 0.036091  | 0.183      |
| 721  | GOBP-RESPONSE-TO-ETHANOL                          | 5    | -0.920693 | -2.053963 | 0.001368  | 0.029496  | 0.128      |
| 722  | REACTOME-NEUROTRANSMITTER-RECEPTORS-AND-POSTSY... | 22   | -0.635096 | -2.107194 | 0.000000  | 0.019659  | 0.066      |
| 723  | REACTOME-TRANSMISSION-ACROSS-CHEMICAL-SYNAPSES    | 23   | -0.647100 | -2.226893 | 0.000000  | 0.004021  | 0.009      |
| 724  | REACTOME-NEURONAL-SYSTEM                          | 26   | -0.658596 | -2.307014 | 0.000000  | 0.003537  | 0.004      |

End of Table

**Supplementary Table S7:** SC caudal segment late (45 DPL peak) profile GSEA results.

| Begin of Table S7 |                                                   |               |      |          |          |           |           |            |  |
|-------------------|---------------------------------------------------|---------------|------|----------|----------|-----------|-----------|------------|--|
|                   | NAME                                              | ID            | SIZE | ES       | NES      | NOM.p.val | FDR.q.val | FWER.p.val |  |
| 0                 | GOBP-REGULATION_OF_TRANSPORT                      | GO-0051049    | 44   | 0.474193 | 1.889698 | 0.003604  | 1.000000  | 0.789      |  |
| 1                 | GOBP-REGULATION_OF_NMDA_RECEPTOR_ACTIVITY         | GO-2000310    | 10   | 0.663015 | 1.875735 | 0.003906  | 0.697381  | 0.829      |  |
| 2                 | REACTOME_BETA_CATENIN_INDEPENDENT_WNT_SIGNALING   | R-RNO-3858494 | 5    | 0.831325 | 1.867099 | 0.009560  | 0.499257  | 0.853      |  |
| 3                 | REACTOME_TRAFFICKING_OF_AMPA_RECEPTORS            | R-RNO-399719  | 11   | 0.586301 | 1.760962 | 0.015444  | 0.925434  | 0.990      |  |
| 4                 | GOBP-POSITIVE_REGULATION_OF_PHOSPHATIDYLINOSIT... | GO-0014068    | 5    | 0.760268 | 1.745467 | 0.009862  | 0.828830  | 0.998      |  |
| 5                 | GOBP-REGULATION_OF_SECRETION                      | GO-0051046    | 14   | 0.559599 | 1.735413 | 0.011450  | 0.740975  | 0.999      |  |
| 6                 | REACTOME_CA_DEPENDENT_EVENTS                      | R-RNO-111996  | 8    | 0.634228 | 1.682862 | 0.025591  | 0.927006  | 1.000      |  |
| 7                 | GOBP-REGULATION_OF_ION_TRANSPORT                  | GO-0043269    | 36   | 0.425834 | 1.674123 | 0.014440  | 0.861662  | 1.000      |  |
| 8                 | GOBP_MULTICELLULAR_ORGANISMAL_RESPONSE_TO_STRESS  | GO-0033555    | 5    | 0.725926 | 1.662167 | 0.023438  | 0.835798  | 1.000      |  |
| 9                 | GOBP-REGULATION_OF_PHOSPHATIDYLINOSITOL_3_KINA... | GO-0014066    | 6    | 0.690108 | 1.649739 | 0.035055  | 0.817130  | 1.000      |  |
| 10                | REACTOME_TRAFFICKING_OF_GLR2_CONTAINING_AMPA...   | R-RNO-416993  | 8    | 0.622691 | 1.635950 | 0.022312  | 0.814072  | 1.000      |  |
| 11                | GOBP-SIGNAL_RELEASE                               | GO-0023061    | 14   | 0.507187 | 1.593127 | 0.028736  | 0.977330  | 1.000      |  |
| 12                | GOBP_NUCLEOSIDE_PHOSPHATE_BIOSYNTHETIC_PROCESS    | GO-1901293    | 5    | 0.695524 | 1.581219 | 0.034682  | 0.969315  | 1.000      |  |
| 13                | REACTOME_NEUROTRANSMITTER_RECEPTORS_AND_POSTSY... | R-RNO-112314  | 22   | 0.443452 | 1.577878 | 0.041353  | 0.916988  | 1.000      |  |
| 14                | GOBP-REGULATION_OF_SYNAPTIC_PLASTICITY            | GO-0048167    | 21   | 0.446175 | 1.565029 | 0.041293  | 0.922754  | 1.000      |  |
| 15                | GOBP_ORGANOPHOSPHATE_BIOSYNTHETIC_PROCESS         | GO-0090407    | 5    | 0.695524 | 1.564679 | 0.049020  | 0.866720  | 1.000      |  |
| 16                | REACTOME_TRANSMISSION_ACROSS_CHEMICAL_SYNAPSES    | R-RNO-112315  | 23   | 0.425414 | 1.555688 | 0.028302  | 0.857711  | 1.000      |  |
| 17                | GOBP-REGULATION_OF_ENDOCYTOSIS                    | GO-0030100    | 6    | 0.625754 | 1.524679 | 0.072614  | 0.964385  | 1.000      |  |
| 18                | GOBP-NEURON_DIFFERENTIATION                       | GO-0030182    | 37   | 0.380794 | 1.498858 | 0.039146  | 1.000000  | 1.000      |  |
| 19                | GOBP-REGULATION_OF_VESICLE_MEDIATED_TRANSPORT     | GO-0060627    | 12   | 0.491614 | 1.475037 | 0.095517  | 1.000000  | 1.000      |  |
| 20                | GOBP-POSITIVE_REGULATION_OF_PEPTIDYL_TYROSINE...  | GO-0050731    | 8    | 0.568632 | 1.470524 | 0.091262  | 1.000000  | 1.000      |  |
| 21                | REACTOME_ACTIVATION_OF_NMDA_RECEPTORS_AND_POST... | R-RNO-442755  | 16   | 0.445542 | 1.466909 | 0.077381  | 1.000000  | 1.000      |  |
| 22                | GOBP-POSITIVE_REGULATION_OF_ORGANELLE_ORGANIZA... | GO-0010638    | 10   | 0.516408 | 1.456897 | 0.081633  | 1.000000  | 1.000      |  |
| 23                | GOBP-ENDOCYTOSIS                                  | GO-0006897    | 8    | 0.561568 | 1.456420 | 0.096457  | 1.000000  | 1.000      |  |
| 24                | GOBP-TAXIS                                        | GO-0042330    | 14   | 0.445904 | 1.450670 | 0.077710  | 1.000000  | 1.000      |  |
| 25                | REACTOME_NEURONAL_SYSTEM                          | R-RNO-112316  | 26   | 0.388813 | 1.445383 | 0.062030  | 1.000000  | 1.000      |  |
| 26                | GOBP-DEVELOPMENTAL_MATURATION                     | GO-0021700    | 5    | 0.644710 | 1.441076 | 0.101167  | 0.989905  | 1.000      |  |
| 27                | GOBP-REGULATION_OF_NEUROTRANSMITTER_TRANSPORT     | GO-0051588    | 6    | 0.607224 | 1.436559 | 0.108911  | 0.975692  | 1.000      |  |
| 28                | GOBP-INSULIN_SECRETION                            | GO-0030073    | 7    | 0.563899 | 1.429114 | 0.085828  | 0.975825  | 1.000      |  |
| 29                | GOBP-PEPTIDE_HORMONE_SECRETION                    | GO-0030072    | 7    | 0.563899 | 1.419962 | 0.116466  | 0.983538  | 1.000      |  |
| 30                | GOBP-NEGATIVE_REGULATION_OF_CELL_PROJECTION_OR... | GO-0031345    | 5    | 0.638554 | 1.417892 | 0.112167  | 0.960695  | 1.000      |  |
| 31                | REACTOME_DAG_AND_IP3_SIGNALING                    | R-RNO-1489509 | 8    | 0.542408 | 1.416519 | 0.089866  | 0.936074  | 1.000      |  |
| 32                | REACTOME_G_PROTEIN_MEDIATED_EVENTS                | R-RNO-112040  | 9    | 0.518577 | 1.415466 | 0.111111  | 0.912166  | 1.000      |  |
| 33                | GOBP-CYTOSKELETON_ORGANIZATION                    | GO-0007010    | 11   | 0.469657 | 1.409864 | 0.099426  | 0.908896  | 1.000      |  |
| 34                | GOBP-SECRETION                                    | GO-0046903    | 24   | 0.385010 | 1.406475 | 0.095149  | 0.896980  | 1.000      |  |
| 35                | GOBP-REGULATION_OF_PEPTIDE_SECRETION              | GO-0002791    | 7    | 0.549880 | 1.405874 | 0.100386  | 0.874777  | 1.000      |  |
| 36                | GOBP-NEUROTRANSMITTER_TRANSPORT                   | GO-0006836    | 7    | 0.544502 | 1.402483 | 0.105263  | 0.864331  | 1.000      |  |
| 37                | GOBP-REGULATION_OF_NEUROTRANSMITTER_LEVELS        | GO-0001505    | 7    | 0.544502 | 1.397612 | 0.130518  | 0.859994  | 1.000      |  |
| 38                | GOBP-POSITIVE_REGULATION_OF_PROTEIN_TYROSINE_K... | GO-0061098    | 5    | 0.610675 | 1.392818 | 0.118321  | 0.856408  | 1.000      |  |
| 39                | GOBP-POSITIVE_REGULATION_OF_INTRACELLULAR_SIGN... | GO-1902533    | 14   | 0.437784 | 1.384024 | 0.097606  | 0.869543  | 1.000      |  |
| 40                | GOBP-REGULATION_OF_PEPTIDE_HORMONE_SECRETION      | GO-0090276    | 6    | 0.583321 | 1.375093 | 0.130769  | 0.883623  | 1.000      |  |

Continuation of Table S7

|    | NAME                                              | ID            | SIZE | ES       | NES      | NOM.p.val | FDR.q.val | FWER.p.val |
|----|---------------------------------------------------|---------------|------|----------|----------|-----------|-----------|------------|
| 41 | GOBP-REGULATION-OF-PEPTIDYL-TYROSINE-PHOSPHORY... | GO-0050730    | 9    | 0.491862 | 1.372482 | 0.123753  | 0.872647  | 1.000      |
| 42 | GOBP-REGULATION-OF-RECEPTOR-MEDIATED-ENDOCYTOSIS  | GO-0048259    | 5    | 0.607019 | 1.366538 | 0.135397  | 0.874096  | 1.000      |
| 43 | GOBP-NEUROGENESIS                                 | GO-0022008    | 41   | 0.339989 | 1.360091 | 0.108893  | 0.878318  | 1.000      |
| 44 | REACTOME-G-ALPHA-Z-SIGNALING-EVENTS               | R-RNO-418597  | 5    | 0.593937 | 1.354861 | 0.131179  | 0.877576  | 1.000      |
| 45 | GOBP-REGULATION-OF-PROTEIN-TYROSINEKINASE-ACT...  | GO-0061097    | 5    | 0.610675 | 1.347464 | 0.177993  | 0.887397  | 1.000      |
| 46 | GOBP-REGULATION-OF-GTPASE-ACTIVITY                | GO-0043087    | 5    | 0.598252 | 1.346646 | 0.150198  | 0.871155  | 1.000      |
| 47 | GOBP-NEURON-MIGRATION                             | GO-0001764    | 5    | 0.598765 | 1.343552 | 0.139489  | 0.863954  | 1.000      |
| 48 | GOBP-POSITIVE-REGULATION-OF-MAPK-CASCADE          | GO-0043410    | 9    | 0.487103 | 1.343002 | 0.137363  | 0.847844  | 1.000      |
| 49 | GOBP-NEGATIVE-REGULATION-OF-NEURON-APOPTOTIC_P... | GO-0043524    | 8    | 0.504369 | 1.322774 | 0.143426  | 0.904410  | 1.000      |
| 50 | GOBP-NEUROTRANSMITTER-SECRETION                   | GO-0007269    | 6    | 0.548844 | 1.321194 | 0.156250  | 0.892574  | 1.000      |
| 51 | GOBP-PEPTIDYL-TYROSINE-MODIFICATION               | GO-0018212    | 10   | 0.467872 | 1.320888 | 0.153696  | 0.876654  | 1.000      |
| 52 | GOBP-PHOSPHATIDYLINOSITOL-3-KINASE-SIGNALING      | GO-0014065    | 7    | 0.528379 | 1.320437 | 0.143426  | 0.861658  | 1.000      |
| 53 | GOBP-RECEPTOR-METABOLIC-PROCESS                   | GO-0043112    | 5    | 0.586000 | 1.316186 | 0.186180  | 0.860001  | 1.000      |
| 54 | REACTOME-SIGNALING-BY-WNT                         | R-RNO-195721  | 7    | 0.517309 | 1.311882 | 0.165339  | 0.858872  | 1.000      |
| 55 | GOBP-PEPTIDE-SECRETION                            | GO-0002790    | 9    | 0.477623 | 1.306499 | 0.179630  | 0.861483  | 1.000      |
| 56 | REACTOME-TRANSCRIPTIONAL-REGULATION-BY-MECP2      | R-RNO-8986944 | 7    | 0.519248 | 1.300339 | 0.170000  | 0.867880  | 1.000      |
| 57 | GOBP-CELLULAR-COMPONENT-MAINTENANCE               | GO-0043954    | 5    | 0.584374 | 1.299695 | 0.171598  | 0.855130  | 1.000      |
| 58 | GOBP-POSITIVE-REGULATION-OF-CELLULAR-COMPONENT... | GO-0051130    | 24   | 0.365521 | 1.297990 | 0.167910  | 0.846191  | 1.000      |
| 59 | GOBP-RECEPTOR-INTERNALIZATION                     | GO-0031623    | 5    | 0.586000 | 1.292789 | 0.182353  | 0.849365  | 1.000      |
| 60 | GOBP-DENDRITE-DEVELOPMENT                         | GO-0016358    | 10   | 0.452142 | 1.292669 | 0.180608  | 0.835940  | 1.000      |
| 61 | GOBP-REGULATION-OF-CYTOSKELETON-ORGANIZATION      | GO-0051493    | 5    | 0.567797 | 1.291066 | 0.179283  | 0.827999  | 1.000      |
| 62 | GOBP-NEURON-DEVELOPMENT                           | GO-0048666    | 34   | 0.327568 | 1.286555 | 0.136525  | 0.829158  | 1.000      |
| 63 | GOBP-POSITIVE-REGULATION-OF-LONG-TERM-SYNAPTIC... | GO-1900273    | 5    | 0.579696 | 1.286023 | 0.192913  | 0.818163  | 1.000      |
| 64 | GOBP-SYNAPSE-ORGANIZATION                         | GO-0050808    | 17   | 0.390541 | 1.285465 | 0.167897  | 0.807278  | 1.000      |
| 65 | GOBP-NEURON-PROJECTION-GUIDANCE                   | GO-0097485    | 9    | 0.467153 | 1.284936 | 0.178908  | 0.796554  | 1.000      |
| 66 | GOBP-INTRACELLULAR-TRANSPORT                      | GO-0046907    | 10   | 0.449779 | 1.279357 | 0.171429  | 0.802230  | 1.000      |
| 67 | GOBP-POSITIVE-REGULATION-OF-NEURON-PROJECTION...  | GO-0010976    | 5    | 0.569975 | 1.273067 | 0.204159  | 0.810015  | 1.000      |
| 68 | GOBP-REGULATION-OF-PEPTIDE-TRANSPORT              | GO-0090087    | 10   | 0.447267 | 1.263074 | 0.197368  | 0.829689  | 1.000      |
| 69 | GOBP-REGULATION-OF-SYNAPSE-STRUCTURE-OR-ACTIVITY  | GO-0050803    | 11   | 0.431532 | 1.257060 | 0.183236  | 0.836068  | 1.000      |
| 70 | GOBP-RECEPTOR-MEDIATED-ENDOCYTOSIS                | GO-0006898    | 6    | 0.530409 | 1.251695 | 0.212598  | 0.841390  | 1.000      |
| 71 | GOBP-ACTIN-FILAMENT-BASED-PROCESS                 | GO-0030029    | 7    | 0.496472 | 1.249611 | 0.213052  | 0.836102  | 1.000      |
| 72 | GOBP-NEGATIVE-REGULATION-OF-NEURON-DEATH          | GO-1901215    | 11   | 0.433861 | 1.246519 | 0.202756  | 0.833888  | 1.000      |
| 73 | GOBP-RESPONSE-TO-STARVATION                       | GO-0042594    | 5    | 0.544196 | 1.244306 | 0.225141  | 0.828896  | 1.000      |
| 74 | GOBP-CELL-MIGRATION                               | GO-0016477    | 22   | 0.348876 | 1.234305 | 0.197158  | 0.850003  | 1.000      |
| 75 | GOBP-LOCOMOTION                                   | GO-0040011    | 31   | 0.323832 | 1.231782 | 0.179584  | 0.846024  | 1.000      |
| 76 | GOBP-INOSITOL-LIPID-MEDIATED-SIGNALING            | GO-0048017    | 8    | 0.462398 | 1.230176 | 0.210421  | 0.839775  | 1.000      |
| 77 | GOBP-REGULATION-OF-CATION-CHANNEL-ACTIVITY        | GO-2001257    | 14   | 0.385089 | 1.228460 | 0.181474  | 0.834055  | 1.000      |
| 78 | GOBP-HORMONE-TRANSPORT                            | GO-0009914    | 9    | 0.441635 | 1.226762 | 0.215686  | 0.828657  | 1.000      |
| 79 | GOBP-POSITIVE-REGULATION-OF-LIPASE-ACTIVITY       | GO-0060193    | 5    | 0.536025 | 1.213444 | 0.228102  | 0.859179  | 1.000      |
| 80 | GOBP-CELL-PROJECTION-ORGANIZATION                 | GO-0030030    | 35   | 0.308541 | 1.210015 | 0.196364  | 0.859001  | 1.000      |
| 81 | GOBP-DICARBOXYLIC-ACID-TRANSPORT                  | GO-0008835    | 5    | 0.540301 | 1.208936 | 0.231237  | 0.851651  | 1.000      |
| 82 | REACTOME-UNBLOCKING-OF-NMDA-RECEPTORS-GLUTAMAT... | R-RNO-438066  | 12   | 0.399865 | 1.206617 | 0.262042  | 0.848212  | 1.000      |
| 83 | GOBP-ACIDIC-AMINO-ACID-TRANSPORT                  | GO-0015800    | 5    | 0.540301 | 1.206126 | 0.241379  | 0.839595  | 1.000      |

Continuation of Table S7

| NAME | ID                                                 | SIZE | ES        | NES      | NOM.p.val | FDR.q.val | FWER.p.val |
|------|----------------------------------------------------|------|-----------|----------|-----------|-----------|------------|
| 84   | GOBP-MONOCARBOXYLIC-ACID-TRANSPORT                 | 5    | 0.540301  | 1.205875 | 0.239216  | 0.830418  | 1.000      |
| 85   | GOBP-FOREBRAIN-DEVELOPMENT                         | 10   | 0.431473  | 1.205413 | 0.237383  | 0.822064  | 1.000      |
| 86   | GOBP-REGULATION-OF-PHOSPHOLIPASE-C-ACTIVITY        | 5    | 0.536025  | 1.203546 | 0.258449  | 0.818090  | 1.000      |
| 87   | GOBP-CELLULAR-RESPONSE-TO-STARVATION               | 5    | 0.544106  | 1.202045 | 0.232902  | 0.813012  | 1.000      |
| 88   | GOBP-REGULATION-OF-NEURONAL-SYNAPTIC-PLASTICITY    | 7    | 0.467012  | 1.194159 | 0.246602  | 0.826569  | 1.000      |
| 89   | GOBP-REGULATION-OF-HORMONE-SECRETION               | 8    | 0.456692  | 1.189201 | 0.272556  | 0.831670  | 1.000      |
| 90   | GOBP-PEPTIDYL-AMINO-ACID-MODIFICATION              | 22   | 0.337516  | 1.185001 | 0.246429  | 0.834955  | 1.000      |
| 91   | GOBP-HEAD-DEVELOPMENT                              | 23   | 0.333965  | 1.178692 | 0.265306  | 0.843617  | 1.000      |
| 92   | GOBP-DENDRITE-MORPHOGENESIS                        | 7    | 0.459567  | 1.174279 | 0.270059  | 0.847240  | 1.000      |
| 93   | GOBP-NEUROTROPHIN-TRK-RECEPTOR-SIGNALING-PATHWAY   | 6    | 0.482493  | 1.163980 | 0.270270  | 0.867239  | 1.000      |
| 94   | GOBP-GLIOGENESIS                                   | 12   | 0.385540  | 1.157432 | 0.282908  | 0.877059  | 1.000      |
| 95   | REACTOME-OPIOID-SIGNALING                          | 12   | 0.374912  | 1.152633 | 0.279383  | 0.882173  | 1.000      |
| 96   | GOBP-MONOAMINE-TRANSPORT                           | 5    | 0.522261  | 1.147676 | 0.306391  | 0.887151  | 1.000      |
| 97   | GOBP-REGULATION-OF-MUSCLE-SYSTEM-PROCESS           | 8    | 0.432231  | 1.146412 | 0.283809  | 0.881638  | 1.000      |
| 98   | GOBP-MUSCLE-ADAPTATION                             | 5    | 0.502323  | 1.144917 | 0.288136  | 0.877039  | 1.000      |
| 99   | GOBP-REGULATION-OF-ORGANELLE-ORGANIZATION          | 14   | 0.357174  | 1.140505 | 0.281536  | 0.880361  | 1.000      |
| 100  | GOBP-NEUROTROPHIN-SIGNALING-PATHWAY                | 6    | 0.482493  | 1.136239 | 0.293878  | 0.884652  | 1.000      |
| 101  | GOBP-CELL-MORPHOGENESIS-INVOLVED-IN-DIFFERENTI...  | 22   | 0.314961  | 1.130659 | 0.280443  | 0.892069  | 1.000      |
| 102  | REACTOME-SIGNALING-BY-NTRK2-TRKB                   | 6    | 0.475849  | 1.125405 | 0.317930  | 0.898172  | 1.000      |
| 103  | GOBP-BIOLOGICAL-ADHESION                           | 19   | 0.330123  | 1.121403 | 0.314885  | 0.900991  | 1.000      |
| 104  | GOBP-REGULATION-OF-MUSCLE-ADAPTATION               | 5    | 0.502323  | 1.121282 | 0.321012  | 0.892711  | 1.000      |
| 105  | GOBP-IONOTROPIC-GLUTAMATE-RECEPTOR-SIGNALING-P...  | 9    | 0.404500  | 1.113204 | 0.318182  | 0.907753  | 1.000      |
| 106  | GOBP-REGULATION-OF-PHOSPHOLIPASE-ACTIVITY          | 6    | 0.451362  | 1.108617 | 0.332669  | 0.912161  | 1.000      |
| 107  | GOBP-POSITIVE-REGULATION-OF-CELLULAR-COMPONENT...  | 9    | 0.402070  | 1.108345 | 0.337786  | 0.904541  | 1.000      |
| 108  | GOBP-CELL-MORPHOGENESIS-INVOLVED-IN-NEURON-DIF...  | 22   | 0.314961  | 1.107255 | 0.323017  | 0.899540  | 1.000      |
| 109  | GOBP-POSITIVE-REGULATION-OF-TRANSPORT              | 26   | 0.303492  | 1.107022 | 0.309055  | 0.891967  | 1.000      |
| 110  | REACTOME-NERVOUS-SYSTEM-DEVELOPMENT                | 14   | 0.351735  | 1.104813 | 0.336614  | 0.890215  | 1.000      |
| 111  | GOBP-REGULATION-OF-NEUROTRANSMITTER-RECEPTOR-A...  | 13   | 0.361988  | 1.101090 | 0.349515  | 0.892293  | 1.000      |
| 112  | GOBP-REGULATION-OF-LIPASE-ACTIVITY                 | 6    | 0.451362  | 1.098449 | 0.353430  | 0.891697  | 1.000      |
| 113  | GOBP-NEURON-PROJECTION-ORGANIZATION                | 8    | 0.410714  | 1.095202 | 0.340741  | 0.892863  | 1.000      |
| 114  | GOBP-CARBOHYDRATE-DERIVATIVE-BIOSYNTHETIC-PROCESS  | 5    | 0.488884  | 1.093777 | 0.352490  | 0.888770  | 1.000      |
| 115  | GOBP-REGULATION-OF-ANION-TRANSPORT                 | 20   | 0.311361  | 1.089931 | 0.363139  | 0.891604  | 1.000      |
| 116  | GOBP-CELL-JUNCTION-ORGANIZATION                    | 19   | 0.320351  | 1.080017 | 0.318761  | 0.886327  | 1.000      |
| 117  | GOBP-CELLULAR-COMPONENT-MORPHOGENESIS              | 25   | 0.294572  | 1.087399 | 0.338374  | 0.883334  | 1.000      |
| 118  | GOBP-LIPID-EXPORT-FROM-CELL                        | 5    | 0.486862  | 1.087141 | 0.343874  | 0.876610  | 1.000      |
| 119  | GOBP-REGULATION-OF-ANATOMICAL-STRUCTURE-MORPHO...  | 17   | 0.322232  | 1.085772 | 0.344828  | 0.872977  | 1.000      |
| 120  | GOBP-PEPTIDYL-SERINE-MODIFICATION                  | 12   | 0.356140  | 1.080782 | 0.356061  | 0.878651  | 1.000      |
| 121  | GOBP-REGULATION-OF-CELLULAR-COMPONENT-BIOGENESIS   | 10   | 0.382421  | 1.071322 | 0.347092  | 0.896404  | 1.000      |
| 122  | GOBP-CELL-MORPHOGENESIS                            | 25   | 0.294572  | 1.068843 | 0.373002  | 0.895596  | 1.000      |
| 123  | GOBP-REGULATION-OF-RESPONSE-TO-EXTERNAL-STIMULUS   | 15   | 0.3032101 | 1.061694 | 0.379648  | 0.907761  | 1.000      |
| 124  | GOBP-RHYTHMIC-PROCESS                              | 15   | 0.339938  | 1.059370 | 0.354167  | 0.907211  | 1.000      |
| 125  | GOBP-REGULATION-OF-LONG-TERM-SYNAPTIC-POTENTIAL... | 6    | 0.437012  | 1.057498 | 0.367387  | 0.905000  | 1.000      |
| 126  | GOBP-NUCLEOBASE-CONTAINING-SMALL-MOLECULE-META...  | 7    | 0.419288  | 1.056727 | 0.384466  | 0.899863  | 1.000      |

Continuation of Table S7

| NAME                                                  | ID            | SIZE | ES       | NES      | NOM.p.val | FDR.q.val | FWER.p.val |
|-------------------------------------------------------|---------------|------|----------|----------|-----------|-----------|------------|
| 127 REACTOME_LONG_TERM_POTENTIATION                   | R-HSA-9620244 | 10   | 0.368356 | 1.055905 | 0.390196  | 0.894971  | 1.000      |
| 128 GOBP_POSITIVE_REGULATION_OF_LOCOMOTION            | GO:0040017    | 11   | 0.359513 | 1.055227 | 0.382524  | 0.889771  | 1.000      |
| 129 GOBP_REGULATION_OF_CELLULAR_COMPONENT_MOVEMENT    | GO:0051270    | 15   | 0.330829 | 1.052534 | 0.387037  | 0.890358  | 1.000      |
| 130 GOBP_REGULATION_OF_TRANS_SYNAPTIC_SIGNALING       | GO:0099177    | 40   | 0.261689 | 1.045476 | 0.392473  | 0.901945  | 1.000      |
| 131 GOBP_CELL_PART_MORPHOGENESIS                      | GO:0032990    | 25   | 0.295472 | 1.042650 | 0.415560  | 0.902186  | 1.000      |
| 132 GOBP_NEGATIVE_REGULATION_OF_CELLULAR_COMPONENT... | GO:0051129    | 11   | 0.353338 | 1.041928 | 0.428571  | 0.896953  | 1.000      |
| 133 GOBP_LONG_TERM_SYNAPTIC_POTENTIATION              | GO:0060291    | 12   | 0.353374 | 1.038738 | 0.404494  | 0.898441  | 1.000      |
| 134 GOBP_POSITIVE_REGULATION_OF_PROTEIN_KINASE_ACT... | GO:0045860    | 18   | 0.303422 | 1.037906 | 0.426326  | 0.893967  | 1.000      |
| 135 REACTOME_EXTRACELLULAR_MATRIX_ORGANIZATION        | R-RNO-1474244 | 5    | 0.465199 | 1.033787 | 0.419660  | 0.897985  | 1.000      |
| 136 GOBP_DNA_METABOLIC_PROCESS                        | GO:0060259    | 6    | 0.430250 | 1.032435 | 0.413255  | 0.895152  | 1.000      |
| 137 GOBP_CARBOXYLIC_ACID_TRANSPORT                    | GO:0046942    | 6    | 0.427394 | 1.030694 | 0.406910  | 0.893121  | 1.000      |
| 138 GOBP_AMINO_ACID_TRANSPORT                         | GO:0006865    | 6    | 0.427394 | 1.024442 | 0.403194  | 0.902651  | 1.000      |
| 139 GOBP_ORGANIC_ANION_TRANSPORT                      | GO:0015711    | 6    | 0.427394 | 1.024186 | 0.413442  | 0.896865  | 1.000      |
| 140 GOBP_AXON_DEVELOPMENT                             | GO:0061564    | 18   | 0.299339 | 1.020975 | 0.441860  | 0.898470  | 1.000      |
| 141 GOBP_PROTEIN_KINASE_B_SIGNALING                   | GO:0043491    | 6    | 0.426799 | 1.020850 | 0.421359  | 0.892488  | 1.000      |
| 142 GOBP_MUSCLE_SYSTEM_PROCESS                        | GO:0003012    | 9    | 0.363704 | 1.017603 | 0.431452  | 0.894329  | 1.000      |
| 143 GOBP_POSITIVE_REGULATION_OF_TRANSPERASE_ACTIVITY  | GO:0051347    | 19   | 0.294287 | 1.017496 | 0.424408  | 0.888378  | 1.000      |
| 144 REACTOME_G_ALPHA_I_SIGNALING_EVENTS               | R-RNO-118594  | 18   | 0.311993 | 1.016865 | 0.418079  | 0.883828  | 1.000      |
| 145 GOBP_SYNAPTIC_SIGNALING                           | GO:0099536    | 47   | 0.251308 | 1.016087 | 0.439153  | 0.879959  | 1.000      |
| 146 GOBP_MUSCLE_ORGAN_DEVELOPMENT                     | GO:0007517    | 9    | 0.364206 | 1.015718 | 0.425094  | 0.874785  | 1.000      |
| 147 GOBP_PURINE_CONTAINING_COMPOUND_METABOLIC_PROCESS | GO:0007521    | 6    | 0.427055 | 1.012255 | 0.417457  | 0.877436  | 1.000      |
| 148 GOBP_CIRCADIAN_RHYTHM                             | GO:0007623    | 13   | 0.325966 | 1.010584 | 0.439338  | 0.875495  | 1.000      |
| 149 GOBP_GLIAL_CELL_DIFFERENTIATION                   | GO:0010001    | 10   | 0.350969 | 1.005991 | 0.431298  | 0.880504  | 1.000      |
| 150 GOBP_CENTRAL_NERVOUS_SYSTEM_DEVELOPMENT           | GO:0007417    | 27   | 0.264750 | 0.995892 | 0.453382  | 0.899605  | 1.000      |
| 151 GOBP_CENTRAL_NERVOUS_SYSTEM_NEURON_DIFFERENTIA... | GO:0021953    | 5    | 0.442387 | 0.990993 | 0.443623  | 0.906285  | 1.000      |
| 152 GOBP_INTRACELLULAR_PROTEIN_TRANSPORT              | GO:0006886    | 8    | 0.374951 | 0.987457 | 0.458647  | 0.909008  | 1.000      |
| 153 GOBP_DENDRITIC_SPINE_DEVELOPMENT                  | GO:0060996    | 6    | 0.407548 | 0.983436 | 0.479087  | 0.913247  | 1.000      |
| 154 GOBP_PROTEIN_PHOSPHORYLATION                      | GO:0006468    | 33   | 0.253179 | 0.982686 | 0.491228  | 0.909195  | 1.000      |
| 155 GOBP_REGULATION_OF_CELL_CELL_ADHESION             | GO:0022407    | 9    | 0.358170 | 0.980487 | 0.482625  | 0.908682  | 1.000      |
| 156 GOBP_POSITIVE_REGULATION_OF_CELL_POPULATION_PR... | GO:0008284    | 21   | 0.279478 | 0.975358 | 0.509434  | 0.914859  | 1.000      |
| 157 GOBP_ESTABLISHMENT_OF_PROTEIN_LOCALIZATION        | GO:0045184    | 17   | 0.290231 | 0.965119 | 0.481188  | 0.934053  | 1.000      |
| 158 REACTOME_GPCR_LIGAND_BINDING                      | R-RNO-500792  | 8    | 0.362500 | 0.960461 | 0.465070  | 0.939485  | 1.000      |
| 159 GOBP_REGULATION_OF_SIGNALING_RECEPTOR_ACTIVITY    | GO:0010469    | 14   | 0.305984 | 0.958621 | 0.493230  | 0.938103  | 1.000      |
| 160 GOBP_GAMETE_GENERATION                            | GO:0007276    | 9    | 0.346877 | 0.957874 | 0.487903  | 0.934140  | 1.000      |
| 161 GOBP_CELLULAR_MACROMOLECULE_CATABOLIC_PROCESS     | GO:0044265    | 5    | 0.425713 | 0.956446 | 0.484112  | 0.932287  | 1.000      |
| 162 GOBP_REGULATION_OF_VASCULATURE_DEVELOPMENT        | GO:1901342    | 5    | 0.415410 | 0.951749 | 0.506692  | 0.937684  | 1.000      |
| 163 GOBP_REGULATION_OF_CELL_ACTIVATION                | GO:0050865    | 8    | 0.370634 | 0.949812 | 0.528155  | 0.936704  | 1.000      |
| 164 GOBP_TELENCEPHALON_DEVELOPMENT                    | GO:0021537    | 7    | 0.392458 | 0.945290 | 0.517304  | 0.941689  | 1.000      |
| 165 GOBP_SYNAPTIC_TRANSMISSION_GLUTAMATERGIC          | GO:0035249    | 13   | 0.315167 | 0.943129 | 0.533582  | 0.941137  | 1.000      |
| 166 GOBP_PLATELET_ACTIVATION                          | GO:0030168    | 6    | 0.239458 | 0.941227 | 0.513627  | 0.940095  | 1.000      |
| 167 GOBP_NERVOUS_SYSTEM_PROCESS                       | GO:0050877    | 38   | 0.239492 | 0.940421 | 0.527103  | 0.936426  | 1.000      |
| 168 GOBP_REGULATION_OF_NEUROGENESIS                   | GO:0050767    | 14   | 0.302020 | 0.940375 | 0.508772  | 0.931008  | 1.000      |
| 169 GOBP_REGULATION_OF_CELL_DEVELOPMENT               | GO:0060284    | 15   | 0.291492 | 0.939479 | 0.548638  | 0.927713  | 1.000      |

Continuation of Table S7

| NAME                                                   | ID            | SIZE | ES       | NES      | NOM.p.val | FDR.q.val | FWER.p.val |
|--------------------------------------------------------|---------------|------|----------|----------|-----------|-----------|------------|
| 170 GOBP-POSITIVE-REGULATION_OF_PEPTIDASE-ACTIVITY     | GO-0010952    | 7    | 0.372933 | 0.938042 | 0.533203  | 0.925641  | 1.000      |
| 171 GOBP-BEHAVIOR                                      | GO-0007610    | 33   | 0.243044 | 0.936297 | 0.565455  | 0.924329  | 1.000      |
| 172 GOBP-MAINTENANCE-OF-LOCATION                       | GO-0051235    | 7    | 0.374341 | 0.932395 | 0.556886  | 0.928069  | 1.000      |
| 173 GOBP-POSITIVE-REGULATION_OF_CYS-TEINE-TYPE-ENDO... | GO-2001056    | 7    | 0.370391 | 0.930391 | 0.556797  | 0.927483  | 1.000      |
| 174 GOBP-NUCLEAR-TRANSPORT                             | GO-0051169    | 5    | 0.411925 | 0.923876 | 0.529297  | 0.937375  | 1.000      |
| 175 GOBP-REGULATION_OF_TRANSPORTER-ACTIVITY            | GO-0032409    | 17   | 0.277075 | 0.923842 | 0.563601  | 0.932135  | 1.000      |
| 176 GOBP-REGULATION-OF-CELLULAR-RESPONSE-TO-STRESS     | GO-0080135    | 9    | 0.337636 | 0.922644 | 0.540385  | 0.929685  | 1.000      |
| 177 GOBP-REGULATION-OF-PEPTIDYL-SERINE-PHOSPHORYLA...  | GO-0033135    | 8    | 0.334193 | 0.920737 | 0.540741  | 0.928779  | 1.000      |
| 178 REACTOME-CLASS-C.3-METABOTROPIC-GLUTAMATE-PHER...  | R-RNO-420499  | 7    | 0.358025 | 0.920452 | 0.547273  | 0.924190  | 1.000      |
| 179 GOBP-POSTSYNAPSE-ORGANIZATION                      | GO-0099173    | 10   | 0.328984 | 0.919403 | 0.560311  | 0.921404  | 1.000      |
| 180 GOBP-RESPONSE-TO-NERVE-GROWTH-FACTOR               | GO-1990089    | 7    | 0.364561 | 0.918029 | 0.548255  | 0.919283  | 1.000      |
| 181 GOBP-COGNITION                                     | GO-0050890    | 28   | 0.243820 | 0.916349 | 0.596330  | 0.918117  | 1.000      |
| 182 GOBP-SEXUAL-REPRODUCTION                           | GO-0019953    | 10   | 0.325728 | 0.915149 | 0.579848  | 0.915766  | 1.000      |
| 183 GOBP-LIPID-LOCALIZATION                            | GO-0010876    | 10   | 0.326341 | 0.914022 | 0.544031  | 0.913386  | 1.000      |
| 184 GOBP-CELL-CYCLE-PROCESS                            | GO-0022402    | 11   | 0.309162 | 0.913205 | 0.543925  | 0.910305  | 1.000      |
| 185 GOBP-CELLULAR-HOMEOSTASIS                          | GO-0019725    | 18   | 0.269594 | 0.905614 | 0.583181  | 0.921848  | 1.000      |
| 186 GOBP-NEURON-APOPTOTIC-PROCESS                      | GO-0051402    | 12   | 0.301217 | 0.904719 | 0.577821  | 0.919101  | 1.000      |
| 187 GOBP-CELLULAR-GLUCOSE-HOMEOSTASIS                  | GO-0001678    | 5    | 0.401787 | 0.903289 | 0.564797  | 0.917454  | 1.000      |
| 188 GOBP-NEGATIVE-REGULATION-OF-CELL-DEATH             | GO-0060548    | 22   | 0.251391 | 0.900058 | 0.613553  | 0.919627  | 1.000      |
| 189 GOBP-PROTEIN-TETRAMERIZATION                       | GO-0051262    | 5    | 0.413626 | 0.898465 | 0.586694  | 0.918128  | 1.000      |
| 190 GOBP-POSITIVE-REGULATION-OF-PROTEIN-PHOSPHORYL...  | GO-0001934    | 22   | 0.248824 | 0.896823 | 0.613553  | 0.916808  | 1.000      |
| 191 GOBP-POSITIVE-REGULATION-OF-PEPTIDYL-SERINE-PH...  | GO-0033138    | 8    | 0.334193 | 0.886341 | 0.599222  | 0.934460  | 1.000      |
| 192 GOBP-POSITIVE-REGULATION-OF-PROTEIN-MODIFICATI...  | GO-0031401    | 22   | 0.248824 | 0.884370 | 0.630713  | 0.933784  | 1.000      |
| 193 REACTOME-ONCOGENIC-MAPK-SIGNALING                  | R-HSA-6802957 | 5    | 0.393206 | 0.881970 | 0.592814  | 0.934243  | 1.000      |
| 194 GOBP-REGULATION-OF-TRANSFERASE-ACTIVITY            | GO-0051338    | 21   | 0.252137 | 0.881283 | 0.639405  | 0.930875  | 1.000      |
| 195 GOBP-REGULATION-OF-HORMONE-LEVELS                  | GO-0010817    | 12   | 0.288500 | 0.879485 | 0.618774  | 0.929808  | 1.000      |
| 196 GOBP-PROTEIN-AUTOPHOSPHORYLATION                   | GO-0046777    | 5    | 0.396215 | 0.879459 | 0.571705  | 0.925129  | 1.000      |
| 197 GOBP-PATTERN-SPECIFICATION-PROCESS                 | GO-0007389    | 6    | 0.367403 | 0.877743 | 0.604478  | 0.924122  | 1.000      |
| 198 GOBP-EXOCYTOSIS                                    | GO-0006887    | 11   | 0.298701 | 0.874911 | 0.606589  | 0.925410  | 1.000      |
| 199 GOBP-REGIONALIZATION                               | GO-0003002    | 6    | 0.367403 | 0.873721 | 0.613208  | 0.923244  | 1.000      |
| 200 GOBP-REGULATION-OF-CATION-TRANSMEMBRANE-TRANSPORT  | GO-1904062    | 16   | 0.267303 | 0.872567 | 0.600000  | 0.921057  | 1.000      |
| 201 GOBP-REGULATION-OF-HYDROLASE-ACTIVITY              | GO-0051336    | 22   | 0.243886 | 0.871070 | 0.638298  | 0.919432  | 1.000      |
| 202 REACTOME-CREB1-PHOSPHORYLATION-THROUGH-NMDA-RE...  | R-RNO-442742  | 8    | 0.324068 | 0.868445 | 0.630058  | 0.920438  | 1.000      |
| 203 GOBP-REGULATION-OF-RESPONSE-TO-STRESS              | GO-0080134    | 19   | 0.250805 | 0.868033 | 0.620112  | 0.916752  | 1.000      |
| 204 GOBP-POSITIVE-REGULATION-OF-SYNAPTIC-TRANSMISSION  | GO-0050806    | 15   | 0.272247 | 0.867334 | 0.626894  | 0.913684  | 1.000      |
| 205 GOBP-REGULATION-OF-PROTEIN-KINASE-ACTIVITY         | GO-0045859    | 21   | 0.252137 | 0.866160 | 0.655303  | 0.911538  | 1.000      |
| 206 GOBP-POSITIVE-REGULATION-OF-PROTEIN-SERINE-THR...  | GO-0071902    | 9    | 0.311934 | 0.859442 | 0.631263  | 0.920460  | 1.000      |
| 207 GOBP-NERVE-DEVELOPMENT                             | GO-0021675    | 9    | 0.314140 | 0.855395 | 0.642857  | 0.923722  | 1.000      |
| 208 GOBP-POSITIVE-REGULATION-OF-PHOSPHORUS-METABOL...  | GO-0010562    | 23   | 0.241394 | 0.853030 | 0.687956  | 0.924206  | 1.000      |
| 209 GOBP-PROTEIN-COMPLEX-OLIGOMERIZATION               | GO-0051259    | 7    | 0.340791 | 0.847107 | 0.642578  | 0.931357  | 1.000      |
| 210 GOBP-REGULATION-OF-PROTEIN-STABILITY               | GO-0031647    | 5    | 0.371534 | 0.843930 | 0.626016  | 0.933335  | 1.000      |
| 211 GOBP-REGULATION-OF-BODY-FLUID-LEVELS               | GO-0050878    | 11   | 0.288916 | 0.838760 | 0.696296  | 0.939037  | 1.000      |
| 212 GOBP-MAPK-CASCADE                                  | GO-0000165    | 18   | 0.250087 | 0.836738 | 0.696589  | 0.938760  | 1.000      |



Continuation of Table S7

| NAME | ID                                                 | SIZE | ES       | NES      | NOM.p.val | FDR.q.val | FWER.p.val |
|------|----------------------------------------------------|------|----------|----------|-----------|-----------|------------|
| 213  | GOBP-RESPONSE.TO.ETHANOL                           | 5    | 0.367444 | 0.836215 | 0.657143  | 0.935451  | 1.000      |
| 214  | GOBP-NEGATIVE-REGULATION.OF-PHOSPHORYLATION        | 7    | 0.330615 | 0.833684 | 0.627413  | 0.936264  | 1.000      |
| 215  | REACTOME-INTEGRATION.OF-ENERGY-METABOLISM          | 5    | 0.374706 | 0.830532 | 0.685951  | 0.938164  | 1.000      |
| 216  | GOBP-CIRCADIAN-REGULATION.OF-GENE-EXPRESSION       | 5    | 0.371419 | 0.826870 | 0.664032  | 0.940922  | 1.000      |
| 217  | REACTOME-L1CAM-INTERACTIONS                        | 5    | 0.365191 | 0.826149 | 0.938112  | 0.938112  | 1.000      |
| 218  | GOBP-REGULATION.OF-INTRACELLULAR-SIGNAL-TRANSD...  | 21   | 0.235186 | 0.825809 | 0.692759  | 0.934416  | 1.000      |
| 219  | GOBP-PROTEIN-CONTAINING-COMPLEX-SUBUNIT-ORGANL...  | 15   | 0.260947 | 0.825183 | 0.680154  | 0.931297  | 1.000      |
| 220  | GOBP-FATTY-ACID-TRANSPORT                          | 6    | 0.346687 | 0.824742 | 0.675048  | 0.927823  | 1.000      |
| 221  | GOBP-AMYLOID-PRECURSOR-PROTEIN-METABOLIC-PROCESS   | 5    | 0.365158 | 0.823020 | 0.676768  | 0.926959  | 1.000      |
| 222  | GOBP-POSITIVE-REGULATION.OF-RESPONSE.TO-EXTERN...  | 9    | 0.305171 | 0.822880 | 0.687379  | 0.923104  | 1.000      |
| 223  | GOBP-POSITIVE-REGULATION.OF-SECRETION              | 6    | 0.341464 | 0.822208 | 0.672691  | 0.920092  | 1.000      |
| 224  | GOBP-NEGATIVE-REGULATION.OF-NERVOUS-SYSTEM.DEV...  | 5    | 0.369760 | 0.821600 | 0.692022  | 0.917247  | 1.000      |
| 225  | GOBP-WOUND-HEALING                                 | 13   | 0.265244 | 0.820774 | 0.686424  | 0.914767  | 1.000      |
| 226  | GOBP-AMYLOID-PRECURSOR-PROTEIN-CATABOLIC-PROCESS   | 5    | 0.365158 | 0.820667 | 0.679842  | 0.910962  | 1.000      |
| 227  | GOBP-AMYLOID-BETA-METABOLIC-PROCESS                | 5    | 0.365158 | 0.815890 | 0.662362  | 0.915814  | 1.000      |
| 228  | GOBP-REGULATION.OF-CIRCADIAN-RHYTHM                | 7    | 0.323822 | 0.815228 | 0.695652  | 0.913084  | 1.000      |
| 229  | GOBP-MITOTIC-CELL-CYCLE                            | 10   | 0.283057 | 0.814593 | 0.705653  | 0.910174  | 1.000      |
| 230  | GOBP-ORGANIC-HYDROXY-COMPOUND-TRANSPORT            | 6    | 0.324395 | 0.813897 | 0.683071  | 0.907495  | 1.000      |
| 231  | REACTOME-RAS-ACTIVATION-UPON-CA2-INFLUX-THROUGH... | 6    | 0.334698 | 0.809383 | 0.704415  | 0.911544  | 1.000      |
| 232  | GOBP-MEMBRANE-ORGANIZATION                         | 12   | 0.265516 | 0.803861 | 0.720532  | 0.917439  | 1.000      |
| 233  | GOBP-DENDRITIC-SPINE-MORPHOGENESIS                 | 5    | 0.356111 | 0.793899 | 0.714286  | 0.931159  | 1.000      |
| 234  | GOBP-CELL-CELL-SIGNALING                           | 56   | 0.198110 | 0.790801 | 0.802158  | 0.932513  | 1.000      |
| 235  | REACTOME-SIGNALING-BY-NTRKS                        | 18   | 0.235097 | 0.787114 | 0.781076  | 0.934896  | 1.000      |
| 236  | GOBP-ADENYLATE-CYCLASE-INHIBITING-G-PROTEIN.CO...  | 5    | 0.349398 | 0.786204 | 0.760700  | 0.932513  | 1.000      |
| 237  | GOBP-POSITIVE-REGULATION.OF-NEUROGENESIS           | 12   | 0.256342 | 0.782953 | 0.713755  | 0.934089  | 1.000      |
| 238  | GOBP-POSITIVE-REGULATION.OF-NERVOUS-SYSTEM.DEV...  | 12   | 0.256342 | 0.782487 | 0.730916  | 0.930966  | 1.000      |
| 239  | GOBP-NEURON-DEATH                                  | 18   | 0.233365 | 0.780036 | 0.766284  | 0.931243  | 1.000      |
| 240  | GOBP-MULTICELLULAR-ORGANISM-REPRODUCTION           | 12   | 0.262573 | 0.779268 | 0.746032  | 0.928669  | 1.000      |
| 241  | GOBP-ADENYLATE-CYCLASE-MODULATING-G-PROTEIN.CO...  | 11   | 0.263417 | 0.775778 | 0.759369  | 0.930842  | 1.000      |
| 242  | GOBP-MEMORY                                        | 13   | 0.257184 | 0.775553 | 0.759358  | 0.927329  | 1.000      |
| 243  | GOBP-REGULATION.OF-PROTEIN-PHOSPHORYLATION         | 25   | 0.207762 | 0.769296 | 0.809437  | 0.933750  | 1.000      |
| 244  | GOBP-RESPONSE.TO-ACID-CHEMICAL                     | 6    | 0.322092 | 0.765735 | 0.787004  | 0.935766  | 1.000      |
| 245  | GOBP-RESPONSE.TO-NITROGEN-COMPOUND                 | 35   | 0.195049 | 0.763210 | 0.793419  | 0.935845  | 1.000      |
| 246  | GOBP-ACTIVATION.OF-MAPK-ACTIVITY                   | 6    | 0.321361 | 0.762326 | 0.752621  | 0.933605  | 1.000      |
| 247  | GOBP-POSITIVE-REGULATION.OF-CELL-DEVELOPMENT       | 12   | 0.256342 | 0.759465 | 0.753846  | 0.934435  | 1.000      |
| 248  | GOBP-NEGATIVE-REGULATION.OF-CELL-DEVELOPMENT       | 6    | 0.317622 | 0.759359 | 0.763303  | 0.930862  | 1.000      |
| 249  | GOBP-G-PROTEIN-COUPLED-RECEPTOR-SIGNALING-PATHWAY  | 18   | 0.222495 | 0.755584 | 0.805970  | 0.928319  | 1.000      |
| 250  | GOBP-POSITIVE-REGULATION.OF-ION-TRANSPORT          | 17   | 0.204321 | 0.755754 | 0.789963  | 0.928925  | 1.000      |
| 251  | GOBP-MALE-GAMETE-GENERATION                        | 5    | 0.335701 | 0.755246 | 0.767442  | 0.925993  | 1.000      |
| 252  | GOBP-POSITIVE-REGULATION.OF-MAP_KINASE-ACTIVITY    | 6    | 0.321361 | 0.754392 | 0.764591  | 0.923579  | 1.000      |
| 253  | GOBP-CHROMATIN-ORGANIZATION                        | 5    | 0.342757 | 0.754165 | 0.773513  | 0.920337  | 1.000      |
| 254  | GOBP-COAGULATION                                   | 8    | 0.288796 | 0.746755 | 0.770245  | 0.927997  | 1.000      |
| 255  | GOBP-REGULATION.OF-MAPK-CASCADE                    | 13   | 0.246107 | 0.745048 | 0.788054  | 0.927042  | 1.000      |

Continuation of Table S7

| NAME                                                  | ID            | SIZE | ES       | NES      | NOM.p.val | FDR.q.val | FWER.p.val |
|-------------------------------------------------------|---------------|------|----------|----------|-----------|-----------|------------|
| 256 REACTOME-SYNAPTIC-ADHESION-LIKE-MOLECULES         | R-RNO-8849932 | 9    | 0.275180 | 0.741833 | 0.779661  | 0.927974  | 1.000      |
| 257 GOBP-REGULATION-OF-SYNAPTIC-TRANSMISSION-GLUTA... | GO-0051966    | 12   | 0.250000 | 0.739406 | 0.825095  | 0.927710  | 1.000      |
| 258 GOBP-REGULATION-OF-LIPID-LOCALIZATION             | GO-1905952    | 5    | 0.329511 | 0.739249 | 0.798058  | 0.924372  | 1.000      |
| 259 GOBP-GLUTAMATE-RECEPTOR-SIGNALING-PATHWAY         | GO-0007215    | 17   | 0.226199 | 0.735311 | 0.811069  | 0.926493  | 1.000      |
| 260 GOBP-POSITIVE-REGULATION-OF-CATALYTIC-ACTIVITY    | GO-0043085    | 29   | 0.195329 | 0.731969 | 0.846863  | 0.927774  | 1.000      |
| 261 GOBP-PEPTIDYL-LYSINE-MODIFICATION                 | GO-0018205    | 5    | 0.323311 | 0.730193 | 0.830000  | 0.926902  | 1.000      |
| 262 GOBP-LONG-TERM-SYNAPTIC-DEPRESSION                | GO-0060292    | 5    | 0.331897 | 0.722831 | 0.804040  | 0.933872  | 1.000      |
| 263 REACTOME-INTERFERON-SIGNALING                     | R-RNO-913531  | 6    | 0.305091 | 0.722232 | 0.804388  | 0.931079  | 1.000      |
| 264 GOBP-ORGANIC-ACID-TRANSPORT                       | GO-0015849    | 7    | 0.285378 | 0.721443 | 0.772201  | 0.928647  | 1.000      |
| 265 GOBP-CELLULAR-RESPONSE-TO-LIPID                   | GO-00071396   | 15   | 0.227292 | 0.716275 | 0.844037  | 0.932069  | 1.000      |
| 266 GOBP-SENSORY-PERCEPTION                           | GO-0007600    | 9    | 0.266628 | 0.715119 | 0.812627  | 0.930006  | 1.000      |
| 267 GOBP-NEGATIVE-REGULATION-OF-CELL-DIFFERENTIATION  | GO-0045596    | 13   | 0.226667 | 0.711885 | 0.832335  | 0.930893  | 1.000      |
| 268 GOBP-MYOTUBE-DIFFERENTIATION                      | GO-0014902    | 5    | 0.317712 | 0.711491 | 0.852273  | 0.927980  | 1.000      |
| 269 GOBP-CELLULAR-RESPONSE-TO-NITROGEN-COMPOUND       | GO-1901699    | 20   | 0.206874 | 0.710506 | 0.838420  | 0.925779  | 1.000      |
| 270 GOBP-NEGATIVE-REGULATION-OF-RESPONSE-TO-EXTERN... | GO-0032102    | 5    | 0.312866 | 0.697960 | 0.848980  | 0.938651  | 1.000      |
| 271 GOBP-ORGANOPHOSPHATE-METABOLIC-PROCESS            | GO-0019637    | 8    | 0.266495 | 0.695321 | 0.833992  | 0.938551  | 1.000      |
| 272 GOBP-REGULATION-OF-PHOSPHORUS-METABOLIC-PROCESS   | GO-0051174    | 26   | 0.186420 | 0.692740 | 0.867993  | 0.938315  | 1.000      |
| 273 GOBP-POSITIVE-REGULATION-OF-ESTABLISHMENT-OF-P... | GO-1904951    | 5    | 0.306104 | 0.691079 | 0.880240  | 0.936872  | 1.000      |
| 274 GOBP-NEGATIVE-REGULATION-OF-DEVELOPMENTAL-PROCESS | GO-0051093    | 13   | 0.226667 | 0.690446 | 0.858527  | 0.934257  | 1.000      |
| 275 GOBP-CHROMOSOME-ORGANIZATION                      | GO-0051276    | 6    | 0.293658 | 0.689974 | 0.859345  | 0.931466  | 1.000      |
| 276 GOBP-SENSORY-ORGAN-DEVELOPMENT                    | GO-0007423    | 8    | 0.266230 | 0.689264 | 0.829114  | 0.928990  | 1.000      |
| 277 GOBP-POSITIVE-REGULATION-OF-PROTEIN-METABOLIC...  | GO-0051247    | 27   | 0.187329 | 0.687395 | 0.879121  | 0.927904  | 1.000      |
| 278 GOBP-NEGATIVE-REGULATION-OF-SYNAPTIC-TRANSMISSION | GO-0050805    | 6    | 0.289438 | 0.680039 | 0.851064  | 0.932858  | 1.000      |
| 279 GOBP-RESPONSE-TO-CALCIUM-ION                      | GO-0051592    | 6    | 0.279779 | 0.675474 | 0.867675  | 0.934761  | 1.000      |
| 280 REACTOME-SIGNALING-BY-GPCR                        | R-RNO-372790  | 22   | 0.189234 | 0.669443 | 0.891071  | 0.937887  | 1.000      |
| 281 GOBP-SKELETAL-MUSCLE-ORGAN-DEVELOPMENT            | GO-0060538    | 5    | 0.302006 | 0.665249 | 0.846881  | 0.939023  | 1.000      |
| 282 GOBP-G-PROTEIN-COUPLED-GLUTAMATE-RECEPTOR-SIGN... | GO-0007216    | 8    | 0.250000 | 0.663957 | 0.882023  | 0.937046  | 1.000      |
| 283 GOBP-SMALL-MOLECULE-BIOSYNTHETIC-PROCESS          | GO-0044283    | 5    | 0.292901 | 0.663176 | 0.901210  | 0.934713  | 1.000      |
| 284 GOBP-DEFENSE-RESPONSE-TO-OTHER-ORGANISM           | GO-0098542    | 9    | 0.239715 | 0.652726 | 0.908549  | 0.942169  | 1.000      |
| 285 GOBP-CATION-TRANSPORT                             | GO-006812     | 25   | 0.182629 | 0.652561 | 0.925573  | 0.939061  | 1.000      |
| 286 GOBP-POSITIVE-REGULATION-OF-CATION-TRANSMEMBR...  | GO-1904064    | 5    | 0.288685 | 0.632338 | 0.895050  | 0.954174  | 1.000      |
| 287 GOBP-REGULATION-OF-NEURON-DIFFERENTIATION         | GO-0045664    | 5    | 0.282744 | 0.632942 | 0.906191  | 0.951125  | 1.000      |
| 288 GOBP-POSITIVE-REGULATION-OF-ANION-TRANSPORT       | GO-1903793    | 9    | 0.229130 | 0.630228 | 0.916201  | 0.950156  | 1.000      |
| 289 GOBP-EPITHELIAL-CELL-PROLIFERATION                | GO-0050673    | 12   | 0.204060 | 0.616150 | 0.933594  | 0.959030  | 1.000      |
| 290 GOBP-ADENYLATE-CYCLASE-INHIBITING-G-PROTEIN.CO... | GO-0007196    | 9    | 0.227848 | 0.608279 | 0.916058  | 0.961906  | 1.000      |
| 291 GOBP-REGULATION-OF-POSTSYNAPSE-ORGANIZATION       | GO-0099175    | 6    | 0.245794 | 0.595094 | 0.940952  | 0.968330  | 1.000      |
| 292 GOBP-CELL-ACTIVATION                              | GO-0001775    | 22   | 0.167833 | 0.593614 | 0.937153  | 0.966003  | 1.000      |
| 293 GOBP-ERK1-AND-ERK2-CASCADE                        | GO-0070371    | 5    | 0.256109 | 0.569189 | 0.962887  | 0.978126  | 1.000      |
| 294 GOBP-VESICLE-MEDIATED-TRANSPORT-IN-SYNAPSE        | GO-0099003    | 7    | 0.221735 | 0.562607 | 0.960452  | 0.978633  | 1.000      |
| 295 GOBP-REGULATION-OF-PROTEIN-LOCALIZATION           | GO-0032880    | 18   | 0.193391 | 0.540815 | 0.973635  | 0.985748  | 1.000      |
| 296 GOBP-ORGANIC-HYDROXY-COMPOUND-METABOLIC-PROCESS   | GO-1901615    | 8    | 0.196391 | 0.520707 | 0.976699  | 0.990253  | 1.000      |
| 297 REACTOME-G-ALPHA-Q-SIGNALING-EVENTS               | R-RNO-416476  | 6    | 0.221354 | 0.516616 | 0.986166  | 0.988301  | 1.000      |
| 298 GOBP-NEUROINFLAMMATORY-RESPONSE                   | GO-0150076    | 5    | 0.228916 | 0.511031 | 0.994434  | 0.986752  | 1.000      |

Continuation of Table S7

| NAME                                                  | ID            | SIZE | ES        | NES       | NOM.p.val | FDR.q.val | FWER.p.val |
|-------------------------------------------------------|---------------|------|-----------|-----------|-----------|-----------|------------|
| 299 GOBP-TEMPERATURE.HOMEOSTASIS                      | GO-0001659    | 5    | 0.228916  | 0.505619  | 0.980469  | 0.984958  | 1.000      |
| 300 REACTOME.ANTIINFLAMMATORY.RESPONSE.FAVOURING....  | R-HSA-9662851 | 5    | -0.228916 | -0.507198 | 0.976331  | 0.984880  | 1.000      |
| 301 GOBP-CELL-CELL.SIGNALING.BY.WNT                   | GO-0198738    | 7    | -0.197779 | -0.510482 | 0.978947  | 0.986170  | 1.000      |
| 302 GOBP-CYTOKINE.PRODUCTION                          | GO-0001816    | 10   | -0.179615 | -0.527599 | 0.967532  | 0.982844  | 1.000      |
| 303 GOBP-REGULATION.OF.OSTEOCLAST.DIFFERENTIATION     | GO-00045670   | 5    | -0.246852 | -0.545334 | 0.978088  | 0.978347  | 1.000      |
| 304 GOBP-SENSORY.PERCEPTION.OF.PAIN                   | GO-0019233    | 5    | -0.240964 | -0.546937 | 0.970833  | 0.979200  | 1.000      |
| 305 GOBP-EPHRAIN.RECEPTOR.SIGNALING.PATHWAY           | GO-00048013   | 5    | -0.253012 | -0.568383 | 0.954918  | 0.970312  | 1.000      |
| 306 GOBP-REGULATION.OF.NERVOUS.SYSTEM.PROCESS         | GO-00031644   | 8    | -0.223237 | -0.607216 | 0.933619  | 0.946897  | 1.000      |
| 307 REACTOME.EPHLEPHRAIN.SIGNALING                    | R-RNO-2682334 | 6    | -0.256098 | -0.620456 | 0.915289  | 0.939045  | 1.000      |
| 308 GOBP-EMBRYONIC.MORPHOGENESIS                      | GO-00045898   | 6    | -0.258797 | -0.626565 | 0.922764  | 0.936186  | 1.000      |
| 309 REACTOME.TRANSCRIPTIONAL.REGULATION.OF.WHITE.A... | R-RNO-381340  | 6    | -0.261621 | -0.627219 | 0.927835  | 0.937960  | 1.000      |
| 310 GOBP-RESPONSE.TO.MONOSACCHARIDE                   | GO-00034284   | 5    | -0.278706 | -0.631007 | 0.898925  | 0.936994  | 1.000      |
| 311 GOBP-RESPONSE.TO.CARBOHYDRATE                     | GO-0009743    | 5    | -0.278706 | -0.631744 | 0.906375  | 0.938600  | 1.000      |
| 312 GOBP-CELLULAR.MACROMOLECULE.LOCALIZATION          | GO-00070727   | 20   | -0.175390 | -0.633743 | 0.937107  | 0.938994  | 1.000      |
| 313 GOBP-LONG-TERM.MEMORY                             | GO-0007616    | 6    | -0.271592 | -0.638189 | 0.904110  | 0.937157  | 1.000      |
| 314 GOBP-NEGATIVE.REGULATION.OF.CELL.POPULATION.PR... | GO-0008285    | 9    | -0.232440 | -0.638640 | 0.902490  | 0.939017  | 1.000      |
| 315 GOBP-POSITIVE.REGULATION.OF.APOPTOTIC.SIGNALIN... | GO-2001235    | 5    | -0.285435 | -0.638714 | 0.906582  | 0.941257  | 1.000      |
| 316 GOBP-REPRODUCTIVE.SYSTEM.DEVELOPMENT              | GO-0061458    | 6    | -0.271035 | -0.641341 | 0.886905  | 0.941168  | 1.000      |
| 317 GOBP-HOMEOSTATIC.PROCESS                          | GO-00042592   | 31   | -0.160737 | -0.642270 | 0.918793  | 0.942579  | 1.000      |
| 318 GOBP-NEGATIVE.REGULATION.OF.TRANSPORT             | GO-00051051   | 13   | -0.201043 | -0.645477 | 0.899782  | 0.941895  | 1.000      |
| 319 GOBP-REGULATION.OF.PEPTIDASE.ACTIVITY             | GO-00052547   | 10   | -0.228685 | -0.653405 | 0.888438  | 0.936271  | 1.000      |
| 320 GOBP-REGULATION.OF.METAL.ION.TRANSPORT            | GO-0010959    | 6    | -0.277772 | -0.653736 | 0.889130  | 0.938226  | 1.000      |
| 321 GOBP-INNATE.IMMUNE.RESPONSE                       | GO-00045087   | 7    | -0.260760 | -0.654917 | 0.866944  | 0.939337  | 1.000      |
| 322 GOBP-REGULATION.OF.MAP.KINASE.ACTIVITY            | GO-00043405   | 9    | -0.240464 | -0.670469 | 0.837553  | 0.924839  | 1.000      |
| 323 GOBP-RESPONSE.TO.INTERLEUKIN.1                    | GO-00070555   | 5    | -0.302904 | -0.672631 | 0.832985  | 0.924760  | 1.000      |
| 324 GOBP-MULTICELLULAR.ORGANISMAL.HOMEOSTASIS         | GO-00048871   | 12   | -0.219280 | -0.672693 | 0.870021  | 0.927020  | 1.000      |
| 325 GOBP-CELLULAR.RESPONSE.TO.DNA.DAMAGE.STIMULUS     | GO-0006974    | 5    | -0.305020 | -0.676017 | 0.879142  | 0.925670  | 1.000      |
| 326 GOBP-ACTIVATION.OF.PROTEIN.KINASE.ACTIVITY        | GO-00032147   | 10   | -0.234035 | -0.676804 | 0.865732  | 0.927011  | 1.000      |
| 327 REACTOME.NGF.STIMULATED.TRANSCRIPTION             | R-RNO-9031628 | 9    | -0.246881 | -0.679442 | 0.866242  | 0.926420  | 1.000      |
| 328 REACTOME.NEGATIVE.REGULATION.OF.NMDA.RECEPTOR.... | R-HSA-961732  | 8    | -0.264214 | -0.684021 | 0.875510  | 0.923613  | 1.000      |
| 329 GOBP-RESPONSE.TO.WOUNDING                         | GO-00096111   | 15   | -0.216045 | -0.688021 | 0.871681  | 0.921289  | 1.000      |
| 330 GOBP-CELLULAR.RESPONSE.TO.KETONE                  | GO-1901655    | 5    | -0.312339 | -0.688531 | 0.859155  | 0.923084  | 1.000      |
| 331 GOBP-REGULATION.OF.HEMOPOIESIS                    | GO-1903706    | 10   | -0.241346 | -0.690281 | 0.865385  | 0.923202  | 1.000      |
| 332 GOBP-INTRINSIC.APOPTOTIC.SIGNALING.PATHWAY        | GO-0097193    | 5    | -0.319499 | -0.698322 | 0.861635  | 0.915427  | 1.000      |
| 333 GOBP-REGULATION.OF.GLIOGENESIS                    | GO-0014013    | 5    | -0.316372 | -0.705483 | 0.834016  | 0.908766  | 1.000      |
| 334 GOBP-CATION.TRANSMEMBRANE.TRANSPORT               | GO-0098655    | 18   | -0.204200 | -0.706553 | 0.870968  | 0.909637  | 1.000      |
| 335 GOBP-CELL.JUNCTION.ASSEMBLY                       | GO-00034329   | 8    | -0.261227 | -0.708840 | 0.835443  | 0.909183  | 1.000      |
| 336 GOBP-NEGATIVE.REGULATION.OF.GENE.EXPRESSION       | GO-0010629    | 11   | -0.239767 | -0.709817 | 0.824242  | 0.910340  | 1.000      |
| 337 GOBP-POSITIVE.REGULATION.OF.PROTEOLYSIS           | GO-00045862   | 8    | -0.261047 | -0.711468 | 0.842767  | 0.910585  | 1.000      |
| 338 REACTOME.ASSEMBLY.AND.CELL.SURFACE.PRESENTATIO... | R-RNO-9609736 | 8    | -0.264214 | -0.712507 | 0.820988  | 0.911463  | 1.000      |
| 339 REACTOME.CELL.CYCLE.MITOTIC                       | GO-0006278    | 5    | -0.322857 | -0.712548 | 0.842324  | 0.913771  | 1.000      |
| 340 GOBP-POSITIVE.REGULATION.OF.GLIOGENESIS           | GO-0014015    | 5    | -0.316372 | -0.716416 | 0.813008  | 0.910955  | 1.000      |
| 341 GOBP-POSITIVE.REGULATION.OF.EPITHELIAL.CELL.MI... | GO-0010634    | 5    | -0.323887 | -0.719243 | 0.805118  | 0.909375  | 1.000      |

Continuation of Table S7

|     | NAME                                               | ID            | SIZE | ES        | NES       | NOM.p.val | FDR.q.val | FWER.p.val |
|-----|----------------------------------------------------|---------------|------|-----------|-----------|-----------|-----------|------------|
| 342 | REACTOME-CELL_CYCLE                                | R-RNO-1640170 | 6    | -0.292499 | -0.719399 | 0.840551  | 0.911584  | 1.000      |
| 343 | GOBP-REGULATION_OF_MYELOID_CELL_DIFFERENTIATION    | GO-0045637    | 9    | -0.257888 | -0.719618 | 0.819328  | 0.913613  | 1.000      |
| 344 | GOBP-RESPONSE_TO_ALCOHOL                           | GO-0097305    | 11   | -0.246735 | -0.720492 | 0.814815  | 0.914861  | 1.000      |
| 345 | GOBP-CELLULAR_RESPONSE_TO_ORGANIC_CYCLIC_COMPOUND  | GO-0071407    | 13   | -0.229440 | -0.721552 | 0.833333  | 0.915816  | 1.000      |
| 346 | GOBP-POSITIVE_REGULATION_OF_CYTOKINE_PRODUCTION    | GO-0001819    | 7    | -0.278564 | -0.722817 | 0.789264  | 0.916528  | 1.000      |
| 347 | GOBP-REGULATION_OF_MITOTIC_CELL_CYCLE              | GO-0007346    | 5    | -0.322142 | -0.724359 | 0.802419  | 0.916838  | 1.000      |
| 348 | REACTOME_PLATELET_ACTIVATION_SIGNALING_AND_AGG...  | R-HSA-76002   | 7    | -0.283210 | -0.724800 | 0.798000  | 0.918615  | 1.000      |
| 349 | GOBP-REGULATION_OF_MUSCLE_CELL_DIFFERENTIATION     | GO-0051147    | 6    | -0.303809 | -0.725187 | 0.812775  | 0.920491  | 1.000      |
| 350 | GOBP-REGULATION_OF_PROTEIN_MODIFICATION_PROCESS    | GO-0031399    | 28   | -0.261142 | -0.733001 | 0.838636  | 0.912060  | 1.000      |
| 351 | REACTOME_NEUREXINS_AND_NEUROLIGINS                 | R-RNO-6794361 | 9    | -0.261142 | -0.733115 | 0.809524  | 0.914344  | 1.000      |
| 352 | GOBP-POSITIVE_REGULATION_OF_SIGNALING              | GO-0023056    | 34   | -0.182556 | -0.735179 | 0.833333  | 0.913763  | 1.000      |
| 353 | GOBP-LOCOMOTOR_BEHAVIOR                            | GO-0007626    | 8    | -0.275000 | -0.736751 | 0.804527  | 0.914065  | 1.000      |
| 354 | GOBP-ENDOTHELIAL_CELL_PROLIFERATION                | GO-0001935    | 8    | -0.279074 | -0.739076 | 0.795031  | 0.913033  | 1.000      |
| 355 | GOBP-RESPONSE_TO_ALKALOID                          | GO-0043279    | 5    | -0.337798 | -0.740503 | 0.779070  | 0.913475  | 1.000      |
| 356 | GOBP-TRANSMEMBRANE_RECEPTOR_PROTEIN_SERINE_THR...  | GO-0007178    | 6    | -0.312285 | -0.741046 | 0.763043  | 0.915138  | 1.000      |
| 357 | GOBP-LIPID_BIOSYNTHETIC_PROCESS                    | GO-0008610    | 6    | -0.312603 | -0.742144 | 0.774757  | 0.915978  | 1.000      |
| 358 | GOBP-REGULATION_OF_LIPID_BIOSYNTHETIC_PROCESS      | GO-0046890    | 6    | -0.312603 | -0.745215 | 0.803063  | 0.914160  | 1.000      |
| 359 | GOBP-REGULATION_OF_PROTEOLYSIS                     | GO-0030162    | 12   | -0.241193 | -0.745667 | 0.783370  | 0.916085  | 1.000      |
| 360 | GOBP-REGULATION_OF_CYSSTEINE_TYPE_ENDOPEPTIDASE... | GO-2000116    | 9    | -0.269447 | -0.747341 | 0.773019  | 0.916188  | 1.000      |
| 361 | GOBP-DEFENSE_RESPONSE                              | GO-0006952    | 19   | -0.213259 | -0.751748 | 0.808190  | 0.912229  | 1.000      |
| 362 | GOBP-NEGATIVE_REGULATION_OF_ION_TRANSPORT          | GO-0043271    | 11   | -0.246828 | -0.752545 | 0.775000  | 0.913558  | 1.000      |
| 363 | GOBP_MULTIORGANISM_PROCESS                         | GO-0051704    | 16   | -0.228735 | -0.754064 | 0.776573  | 0.913702  | 1.000      |
| 364 | GOBP-CARBOHYDRATE_DERIVATIVE_METABOLIC_PROCESS     | GO-1901135    | 8    | -0.279235 | -0.754475 | 0.764831  | 0.915685  | 1.000      |
| 365 | REACTOME_MAPK_FAMILY_SIGNALING_CASCADES            | R-RNO-5683057 | 12   | -0.253182 | -0.756055 | 0.787629  | 0.915858  | 1.000      |
| 366 | GOBP-FAT_CELL_DIFFERENTIATION                      | GO-0045444    | 9    | -0.272323 | -0.761995 | 0.761616  | 0.909097  | 1.000      |
| 367 | GOBP-POSITIVE_REGULATION_OF_ENDOTHELIAL_CELL_P...  | GO-0001938    | 6    | -0.322667 | -0.763973 | 0.761506  | 0.908547  | 1.000      |
| 368 | GOBP_LEUKOCYTE_MEDIATED_IMMUNITY                   | GO-0002443    | 8    | -0.287500 | -0.764228 | 0.751073  | 0.910698  | 1.000      |
| 369 | GOBP-REGULATION_OF_LIPID_METABOLIC_PROCESS         | GO-0019216    | 7    | -0.300315 | -0.765164 | 0.754678  | 0.911893  | 1.000      |
| 370 | GOBP-REGULATION_OF_FAT_CELL_DIFFERENTIATION        | GO-0045598    | 6    | -0.315394 | -0.766871 | 0.755061  | 0.911597  | 1.000      |
| 371 | GOBP_METAL_ION_TRANSPORT                           | GO-0030001    | 11   | -0.262125 | -0.768832 | 0.742204  | 0.910973  | 1.000      |
| 372 | REACTOME_NUCLEAR_EVENTS_KINASE_AND_TRANSCRIPTI...  | R-RNO-198725  | 11   | -0.259394 | -0.774536 | 0.731006  | 0.904595  | 1.000      |
| 373 | GOBP-RESPONSE_TO_TEMPERATURE_STIMULUS              | GO-0009266    | 9    | -0.279007 | -0.774571 | 0.721519  | 0.907112  | 1.000      |
| 374 | GOBP_APOPTOTIC_PROCESS                             | GO-0006915    | 35   | -0.192045 | -0.781123 | 0.815618  | 0.898614  | 1.000      |
| 375 | GOBP-REGULATION_OF_LEUKOCYTE_DIFFERENTIATION       | GO-1902105    | 9    | -0.284453 | -0.781447 | 0.723493  | 0.900689  | 1.000      |
| 376 | GOBP-POSITIVE_REGULATION_OF_EPITHELIAL_CELL_PR...  | GO-0050679    | 7    | -0.304020 | -0.782213 | 0.740365  | 0.900515  | 1.000      |
| 377 | GOBP-CALCIUM_ION_TRANSPORT                         | GO-0006816    | 11   | -0.262125 | -0.783848 | 0.701826  | 0.901949  | 1.000      |
| 378 | GOBP-POSITIVE_REGULATION_OF_GENE_EXPRESSION        | GO-0010628    | 16   | -0.235251 | -0.783966 | 0.744240  | 0.904309  | 1.000      |
| 379 | REACTOME_HEMOSTASIS                                | R-RNO-109582  | 14   | -0.250798 | -0.791148 | 0.755940  | 0.894731  | 1.000      |
| 380 | GOBP-REGULATION_OF_POSTSYNAPTIC_MEMBRANE_POTEN...  | GO-0060078    | 14   | -0.242890 | -0.793276 | 0.722105  | 0.893882  | 1.000      |
| 381 | GOBP-REGULATION_OF_NEURON_PROJECTION_DEVELOPMENT   | GO-0010975    | 16   | -0.235544 | -0.793309 | 0.725055  | 0.896437  | 1.000      |
| 382 | REACTOME_CIRCADIAN_CLOCK                           | R-HSA-400253  | 5    | -0.354545 | -0.795131 | 0.737705  | 0.895913  | 1.000      |
| 383 | GOBP-ESTABLISHMENT_OF_PROTEIN_LOCALIZATION_TO...   | GO-0072594    | 5    | -0.361555 | -0.802688 | 0.706935  | 0.885710  | 1.000      |
| 384 | GOBP-RESPONSE_TO_PEPTIDE                           | GO-1901652    | 18   | -0.232673 | -0.805931 | 0.737166  | 0.882776  | 1.000      |

Continuation of Table S7

| NAME                                                  | ID            | SIZE | ES        | NES       | NOM.p.val | FDR.q.val | FWER.p.val |
|-------------------------------------------------------|---------------|------|-----------|-----------|-----------|-----------|------------|
| 385 REACTOME_PROTEIN_PROTEIN_INTERACTIONS_AT_SYNAPSES | R-RNO-6794362 | 12   | -0.263158 | -0.806973 | 0.714575  | 0.883612  | 1.000      |
| 386 GOBP_NEGATIVE_REGULATION_OF_LIPID_METABOLIC_PR... | GO-0045833    | 5    | -0.359331 | -0.809689 | 0.705882  | 0.881469  | 1.000      |
| 387 GOBP_NEGATIVE_REGULATION_OF_ANION_TRANSPORT       | GO-1903792    | 8    | -0.302382 | -0.810514 | 0.686235  | 0.882675  | 1.000      |
| 388 GOBP_REGULATION_OF_MYELOID_LEUKOCYTE_DIFFERENT... | GO-0002761    | 8    | -0.302711 | -0.813524 | 0.678350  | 0.879499  | 1.000      |
| 389 GOBP_REGULATION_OF_SYSTEM_PROCESS                 | GO-0044057    | 18   | -0.238700 | -0.813681 | 0.736739  | 0.881858  | 1.000      |
| 390 GOBP_POSITIVE_REGULATION_OF_DEFENSE_RESPONSE      | GO-0031349    | 5    | -0.358253 | -0.814454 | 0.679513  | 0.883166  | 1.000      |
| 391 GOBP_PROTEIN_LOCALIZATION_TO_ORGANELLE            | GO-0033365    | 8    | -0.300993 | -0.814635 | 0.704225  | 0.885508  | 1.000      |
| 392 GOBP_MUSCLE_TISSUE_DEVELOPMENT                    | GO-0060537    | 11   | -0.281116 | -0.818114 | 0.696842  | 0.882119  | 1.000      |
| 393 GOBP_RESPONSE_TO_OXYGEN_CONTAINING_COMPOUND       | GO-1901700    | 39   | -0.199484 | -0.821008 | 0.736501  | 0.879639  | 1.000      |
| 394 GOBP_CELLULAR_RESPONSE_TO_ALCOHOL                 | GO-0097306    | 5    | -0.361833 | -0.822973 | 0.701903  | 0.878610  | 1.000      |
| 395 REACTOME_NEUTROPHIL_DEGRANULATION                 | R-RNO-6798695 | 6    | -0.341463 | -0.823651 | 0.660338  | 0.880154  | 1.000      |
| 396 GOBP_NEGATIVE_REGULATION_OF_MULTICELLULAR_ORGA... | GO-0051241    | 15   | -0.250690 | -0.824490 | 0.668860  | 0.881454  | 1.000      |
| 397 GOBP_REGULATION_OF_CELL_PROJECTION_ORGANIZATION   | GO-0031344    | 20   | -0.235060 | -0.825317 | 0.692140  | 0.882725  | 1.000      |
| 398 GOBP_MYELOID_LEUKOCYTE_MEDIATED_IMMUNITY          | GO-0002444    | 6    | -0.341463 | -0.827919 | 0.659919  | 0.880997  | 1.000      |
| 399 GOBP_DIVALENT_INORGANIC_CATION_HOMEOSTASIS        | GO-0072507    | 13   | -0.269552 | -0.834821 | 0.692500  | 0.870895  | 1.000      |
| 400 GOBP_CELL_ACTIVATION_INVOLVED_IN_IMMUNE_RESPONSE  | GO-0002263    | 6    | -0.341463 | -0.835395 | 0.655031  | 0.872581  | 1.000      |
| 401 GOBP_REGULATION_OF_CELL_DEATH                     | GO-0010941    | 34   | -0.208777 | -0.836920 | 0.731405  | 0.872578  | 1.000      |
| 402 GOBP_ENDOMEMBRANE_SYSTEM_ORGANIZATION             | GO-0010256    | 6    | -0.345614 | -0.846190 | 0.639066  | 0.858012  | 1.000      |
| 403 GOBP_REGULATION_OF_CELLULAR_LOCALIZATION          | GO-0060341    | 17   | -0.245999 | -0.848673 | 0.656613  | 0.855842  | 1.000      |
| 404 GOBP_REGULATION_OF_ENDOTHELIAL_CELL_MIGRATION     | GO-0010594    | 5    | -0.377361 | -0.848914 | 0.652928  | 0.858065  | 1.000      |
| 405 GOBP_REGULATION_OF_CELLULAR_CATABOLIC_PROCESS     | GO-0031329    | 10   | -0.292255 | -0.852262 | 0.642553  | 0.854766  | 1.000      |
| 406 GOBP_REGULATION_OF_CYTOSOLIC_CALCULUM_CONCE...    | GO-0051480    | 13   | -0.269552 | -0.855593 | 0.641791  | 0.851355  | 1.000      |
| 407 GOBP_SECOND_MESSENGER_MEDIATED_SIGNALING          | GO-0019932    | 16   | -0.259088 | -0.858059 | 0.638393  | 0.849343  | 1.000      |
| 408 GOBP_REGULATION_OF_CELL_DIFFERENTIATION           | GO-0045595    | 36   | -0.212871 | -0.858170 | 0.664269  | 0.851756  | 1.000      |
| 409 GOBP_CELLULAR_RESPONSE_TO ABIOTIC_STIMULUS        | GO-0071214    | 7    | -0.341724 | -0.859745 | 0.616601  | 0.851612  | 1.000      |
| 410 GOBP_POSITIVE_REGULATION_OF_CELL_PROJECTION_OR... | GO-0031346    | 10   | -0.294934 | -0.860325 | 0.639175  | 0.853199  | 1.000      |
| 411 GOBP_POSITIVE_REGULATION_OF_HYDROLASE_ACTIVITY    | GO-0051345    | 16   | -0.254525 | -0.863409 | 0.640333  | 0.850267  | 1.000      |
| 412 GOBP_CALCULUM_MEDIATED_SIGNALING                  | GO-0019722    | 10   | -0.301784 | -0.867092 | 0.652977  | 0.845853  | 1.000      |
| 413 GOBP_MUSCLE_STRUCTURE_DEVELOPMENT                 | GO-0061061    | 16   | -0.263450 | -0.867893 | 0.633406  | 0.847142  | 1.000      |
| 414 GOBP_CIRCULATORY_SYSTEM_PROCESS                   | GO-0003013    | 5    | -0.400419 | -0.869143 | 0.613821  | 0.847502  | 1.000      |
| 415 GOBP_METAL_ION_HOMEOSTASIS                        | GO-0055065    | 14   | -0.270270 | -0.870285 | 0.610309  | 0.848077  | 1.000      |
| 416 GOBP_RESPONSE_TO PEPTIDE_HORMONE                  | GO-0043434    | 13   | -0.274055 | -0.870441 | 0.637097  | 0.850428  | 1.000      |
| 417 GOBP_CELLULAR_ION_HOMEOSTASIS                     | GO-0008873    | 14   | -0.270270 | -0.871187 | 0.627409  | 0.851754  | 1.000      |
| 418 GOBP_MYELOID_LEUKOCYTE_DIFFERENTIATION            | GO-0002573    | 11   | -0.292851 | -0.875138 | 0.595618  | 0.846775  | 1.000      |
| 419 GOBP_POSITIVE_REGULATION_OF_MOLECULAR_FUNCTION    | GO-0044093    | 37   | -0.214430 | -0.876418 | 0.651376  | 0.847137  | 1.000      |
| 420 GOBP_POSITIVE_REGULATION_OF_AXONOGENESIS          | GO-0050772    | 5    | -0.388118 | -0.877223 | 0.594080  | 0.848456  | 1.000      |
| 421 REACTOME_ADAPTIVE_IMMUNE_SYSTEM                   | R-RNO-1280218 | 9    | -0.317988 | -0.878575 | 0.596194  | 0.848596  | 1.000      |
| 422 GOBP_REGULATION_OF_AXONOGENESIS                   | GO-0050770    | 7    | -0.342160 | -0.883526 | 0.603696  | 0.842097  | 1.000      |
| 423 GOBP_OSTEOCLAST_DIFFERENTIATION                   | GO-0030316    | 6    | -0.367724 | -0.883716 | 0.575630  | 0.844514  | 1.000      |
| 424 GOBP_RESPONSE_TO NICOTINE                         | GO-0035094    | 7    | -0.345679 | -0.885157 | 0.580499  | 0.844347  | 1.000      |
| 425 GOBP_REGULATION_OF_INFLAMMATORY_RESPONSE          | GO-0050727    | 7    | -0.353646 | -0.887432 | 0.578000  | 0.842869  | 1.000      |
| 426 GOBP_RESPONSE_TO HEAT                             | GO-0009408    | 7    | -0.347222 | -0.892237 | 0.580392  | 0.836169  | 1.000      |
| 427 GOBP_ANIMAL_ORGAN_MORPHOGENESIS                   | GO-0009887    | 12   | -0.293925 | -0.896242 | 0.588727  | 0.831408  | 1.000      |

Continuation of Table S7

| NAME | ID                                                | SIZE          | ES         | NES       | NOM.p.val | FDR.q.val | FWER.p.val |
|------|---------------------------------------------------|---------------|------------|-----------|-----------|-----------|------------|
| 428  | GOBP-EXCITATORY-CHEMICAL-SYNAPTIC-TRANSMISSION    | 5             | -0.398286  | -0.896846 | 0.565591  | 0.832856  | 1.000      |
| 429  | GOBP-POSITIVE-REGULATION-OF-SMALL-MOLECULE-MET... | 5             | -0.403905  | -0.900251 | 0.579710  | 0.829196  | 1.000      |
| 430  | GOBP-REGULATION-OF-TRANSMEMBRANE-TRANSPORT        | 23            | -0.243276  | -0.900782 | 0.597458  | 0.830935  | 1.000      |
| 431  | GOBP-REGULATION-OF-CELL-CYCLE-PROCESS             | 5             | -0.4010583 | -0.904073 | 0.556263  | 0.827612  | 1.000      |
| 432  | GOBP-REGULATION-OF-DEFENSE-RESPONSE               | 7             | -0.353646  | -0.907198 | 0.565306  | 0.824377  | 1.000      |
| 433  | GOBP-CHEMICAL-SYNAPTIC-TRANSMISSION-POSTSYNAPTIC  | 9             | -0.325642  | -0.907492 | 0.576344  | 0.826677  | 1.000      |
| 434  | GOBP-NEGATIVE-REGULATION-OF-IMMUNE-SYSTEM-PROCESS | 5             | -0.405951  | -0.910443 | 0.567901  | 0.823638  | 1.000      |
| 435  | GOBP-LEUKOCYTE-DIFFERENTIATION                    | 15            | -0.281485  | -0.911164 | 0.553061  | 0.825066  | 1.000      |
| 436  | GOBP-REGULATION-OF-VASCULAR-ASSOCIATED-SMOOTH...  | 5             | -0.404269  | -0.911264 | 0.557203  | 0.827691  | 1.000      |
| 437  | GOBP-CHEMICAL-HOMEOSTASIS                         | 23            | -0.240829  | -0.913117 | 0.557447  | 0.826857  | 1.000      |
| 438  | GOBP-CELL-POPULATION-PROLIFERATION                | 32            | -0.230967  | -0.917377 | 0.581292  | 0.821145  | 1.000      |
| 439  | GOBP-PROTEOLYSIS                                  | 17            | -0.273142  | -0.917844 | 0.556769  | 0.823001  | 1.000      |
| 440  | GOBP-ORGANONITROGEN-COMPOUND-BIOSYNTHETIC-PROCESS | 13            | -0.293081  | -0.919931 | 0.567329  | 0.821940  | 1.000      |
| 441  | GOBP-EMBRYO-DEVELOPMENT                           | 14            | -0.287247  | -0.920467 | 0.540773  | 0.823744  | 1.000      |
| 442  | GOBP-INTRACELLULAR-RECEPTOR-SIGNALING-PATHWAY     | 5             | -0.412425  | -0.922779 | 0.547619  | 0.821917  | 1.000      |
| 443  | HALLMARK-KRAS-SIGNALING-UP                        | M5953         | -0.384706  | -0.924107 | 0.543611  | 0.822284  | 1.000      |
| 444  | GOBP-REPRODUCTION                                 | 18            | -0.265472  | -0.925872 | 0.556745  | 0.821610  | 1.000      |
| 445  | GOBP-ANATOMICAL-STRUCTURE-HOMEOSTASIS             | 7             | -0.366772  | -0.926661 | 0.548035  | 0.823007  | 1.000      |
| 446  | GOBP-SMALL-GTPASE-MEDIATED-SIGNAL-TRANSDUCTION    | 8             | -0.350114  | -0.928278 | 0.520085  | 0.822898  | 1.000      |
| 447  | REACTOME-INTRACELLULAR-SIGNALING-BY-SECOND-MES... | 15            | -0.277256  | -0.929408 | 0.532225  | 0.823669  | 1.000      |
| 448  | GOBP-CELL-SURFACE-RECEPTOR-SIGNALING-PATHWAY-I... | 15            | -0.282610  | -0.930717 | 0.548729  | 0.824308  | 1.000      |
| 449  | GOBP-ION-HOMEOSTASIS                              | 16            | -0.277778  | -0.931811 | 0.528926  | 0.825120  | 1.000      |
| 450  | GOBP-REGULATION-OF-EPITHELIAL-CELL-MIGRATION      | 6             | -0.385622  | -0.932442 | 0.548035  | 0.826958  | 1.000      |
| 451  | GOBP-MYELOID-LEUKOCYTE-ACTIVATION                 | 8             | -0.350000  | -0.932564 | 0.531697  | 0.829731  | 1.000      |
| 452  | GOBP-REGULATION-OF-MEMBRANE-POTENTIAL             | 17            | -0.276998  | -0.933258 | 0.560000  | 0.831254  | 1.000      |
| 453  | GOBP-DEVELOPMENTAL-PROCESS-INVOLVED-IN-REPRODU... | 11            | -0.322967  | -0.935609 | 0.553377  | 0.829532  | 1.000      |
| 454  | GOBP-CELLULAR-RESPONSE-TO-MOLECULE-OF-BACTERIA... | 8             | -0.359270  | -0.943030 | 0.528184  | 0.817404  | 1.000      |
| 455  | GOBP-CELLULAR-RESPONSE-TO-EXTRACELLULAR-STIMULUS  | 8             | -0.349032  | -0.943290 | 0.496774  | 0.815733  | 1.000      |
| 456  | GOBP-RESPONSE-TO-ENDOGENOUS-STIMULUS              | 34            | -0.233717  | -0.945859 | 0.517986  | 0.817606  | 1.000      |
| 457  | GOBP-CELLULAR-RESPONSE-TO-HORMONE-STIMULUS        | 11            | -0.318423  | -0.948209 | 0.520518  | 0.815549  | 1.000      |
| 458  | GOBP-TRANSMEMBRANE-RECEPTOR-PROTEIN-TYROSINE-K... | 19            | -0.270459  | -0.948857 | 0.514768  | 0.817212  | 1.000      |
| 459  | GOBP-PHAGOCYTOSIS                                 | 5             | -0.424990  | -0.954268 | 0.495069  | 0.809423  | 1.000      |
| 460  | REACTOME-DEVELOPMENTAL-BIOLOGY                    | R-RNO-1266738 | -0.265255  | -0.954517 | 0.517316  | 0.811991  | 1.000      |
| 461  | GOBP-ERBB-SIGNALING-PATHWAY                       | GO-0038127    | -0.428193  | -0.958321 | 0.515924  | 0.807107  | 1.000      |
| 462  | GOBP-CELLULAR-RESPONSE-TO-BIOTIC-STIMULUS         | 8             | -0.359270  | -0.959955 | 0.508097  | 0.806921  | 1.000      |
| 463  | GOBP-POSITIVE-REGULATION-OF-MULTICELLULAR-ORGA... | 32            | -0.243568  | -0.963246 | 0.516704  | 0.803043  | 1.000      |
| 464  | GOBP-POSITIVE-REGULATION-OF-CELLULAR-PROTEIN-L... | 7             | -0.370922  | -0.965362 | 0.477551  | 0.802094  | 1.000      |
| 465  | GOBP-POSITIVE-REGULATION-OF-TRANSMEMBRANE-TRAN... | GO-1903829    | -0.372886  | -0.967529 | 0.459459  | 0.800604  | 1.000      |
| 466  | GOBP-CELLULAR-RESPONSE-TO-OXYGEN-CONTAINING-CO... | GO-1901701    | -0.247816  | -0.969591 | 0.507463  | 0.799452  | 1.000      |
| 467  | GOBP-PERIPHERAL-NERVOUS-SYSTEM-DEVELOPMENT        | GO-0007422    | -0.410127  | -0.970162 | 0.467836  | 0.802346  | 1.000      |
| 468  | GOBP-MONOCARBOXYLIC-ACID-METABOLIC-PROCESS        | GO-0032787    | -0.385791  | -0.978392 | 0.491453  | 0.790244  | 1.000      |
| 469  | GOBP-PROTEIN-MODIFICATION-BY-SMALL-PROTEIN-CON... | GO-0070647    | -0.371359  | -0.980746 | 0.481153  | 0.788432  | 1.000      |
| 470  | GOBP-RESPONSE-TO-OXYGEN-LEVELS                    | GO-0070482    |            |           |           |           |            |

Continuation of Table S7

|     | NAME                                              | ID            | SIZE | ES        | NES       | NOM.p.val | FDR.q.val | FWER.p.val |
|-----|---------------------------------------------------|---------------|------|-----------|-----------|-----------|-----------|------------|
| 471 | GOBP-POSITIVE-REGULATION-OF-HEMOPOIESIS           | GO-1903708    | 7    | -0.390164 | -0.982112 | 0.453280  | 0.788581  | 1.000      |
| 472 | GOBP-INFLAMMATORY-RESPONSE                        | GO-0006954    | 12   | -0.321055 | -0.983722 | 0.447257  | 0.788435  | 1.000      |
| 473 | GOBP-REGULATION-OF-MULTICELLULAR-ORGANISMAL-DE... | GO-2000026    | 31   | -0.247448 | -0.986242 | 0.494279  | 0.786297  | 1.000      |
| 474 | GOBP-OSSIFICATION                                 | GO-0001503    | 9    | -0.355999 | -0.987187 | 0.463938  | 0.787511  | 1.000      |
| 475 | GOBP-REGULATION-OF-LYMPHOCYTE-ACTIVATION          | GO-0051249    | 5    | -0.447016 | -0.994596 | 0.460581  | 0.774988  | 1.000      |
| 476 | GOBP-CELLULAR-COMPONENT-DISASSEMBLY               | GO-0022411    | 6    | -0.412176 | -0.997021 | 0.450397  | 0.773021  | 1.000      |
| 477 | GOBP-POSITIVE-REGULATION-OF-MYELOID-LEUKOCYTE-... | GO-0002763    | 6    | -0.415664 | -0.997227 | 0.470833  | 0.775777  | 1.000      |
| 478 | GOBP-PROTEIN-LOCALIZATION-TO-POSTSYNAPSE          | GO-0062237    | 5    | -0.449699 | -0.998643 | 0.443320  | 0.776118  | 1.000      |
| 479 | GOBP-SMALL-MOLECULE-METABOLIC-PROCESS             | GO-0044281    | 16   | -0.299032 | -1.001057 | 0.433333  | 0.774084  | 1.000      |
| 480 | GOBP-RESPONSE-TO-LIPID                            | GO-0033993    | 19   | -0.289528 | -1.001403 | 0.464368  | 0.776527  | 1.000      |
| 481 | REACTOME-CELLULAR-RESPONSES-TO-EXTERNAL-STIMULI   | R-RNO-8953897 | 11   | -0.344597 | -1.001478 | 0.435146  | 0.779584  | 1.000      |
| 482 | GOBP-IMMUNE-SYSTEM-DEVELOPMENT                    | GO-0002520    | 17   | -0.289842 | -1.001718 | 0.474946  | 0.782287  | 1.000      |
| 483 | GOBP-ASSOCIATIVE-LEARNING                         | GO-0008306    | 7    | -0.396731 | -1.003805 | 0.434426  | 0.780959  | 1.000      |
| 484 | REACTOME-POST-TRANSLATIONAL-PROTEIN-MODIFICATION  | R-RNO-597592  | 7    | -0.392535 | -1.004320 | 0.443750  | 0.783140  | 1.000      |
| 485 | GOBP-POSITIVE-REGULATION-OF-DEVELOPMENTAL-PROCESS | GO-0051094    | 32   | -0.247034 | -1.005577 | 0.435268  | 0.783442  | 1.000      |
| 486 | GOBP-LEARNING                                     | GO-0007612    | 13   | -0.332276 | -1.013174 | 0.427293  | 0.770430  | 1.000      |
| 487 | GOBP-REGULATION-OF-NERVOUS-SYSTEM-DEVELOPMENT     | GO-0051960    | 15   | -0.312689 | -1.014100 | 0.420719  | 0.771742  | 1.000      |
| 488 | GOBP-NEGATIVE-REGULATION-OF-SIGNALING             | GO-0023057    | 21   | -0.283387 | -1.016667 | 0.422566  | 0.768912  | 1.000      |
| 489 | GOBP-PROTEIN-LOCALIZATION-TO-SYNAPSE              | GO-0035418    | 5    | -0.449699 | -1.018342 | 0.446721  | 0.768462  | 1.000      |
| 490 | REACTOME-VESICLE-MEDIATED-TRANSPORT               | R-RNO-5653656 | 5    | -0.454482 | -1.022191 | 0.430584  | 0.763599  | 1.000      |
| 491 | GOBP-MYELOID-CELL-DIFFERENTIATION                 | GO-0030099    | 13   | -0.325592 | -1.023580 | 0.396146  | 0.763811  | 1.000      |
| 492 | REACTOME-MEMBRANE-TRAFFICKING                     | R-RNO-199991  | 5    | -0.454482 | -1.024754 | 0.418919  | 0.764517  | 1.000      |
| 493 | GOBP-EPITHELIAL-CELL-DIFFERENTIATION              | GO-0030855    | 7    | -0.396753 | -1.026972 | 0.422833  | 0.762951  | 1.000      |
| 494 | GOBP-REGULATION-OF-PROTEIN-SERINE-THREONINE-KI... | GO-0071900    | 12   | -0.338359 | -1.028841 | 0.401806  | 0.762259  | 1.000      |
| 495 | GOBP-NEGATIVE-REGULATION-OF-CELL-CYCLE            | GO-0045786    | 5    | -0.464469 | -1.032478 | 0.380435  | 0.757881  | 1.000      |
| 496 | GOBP-AMEBOIDAL-TYPE-CELL-MIGRATION                | GO-0001667    | 11   | -0.345932 | -1.032926 | 0.417323  | 0.760135  | 1.000      |
| 497 | GOBP-RESPONSE-TO-KETONE                           | GO-1901654    | 7    | -0.410843 | -1.035647 | 0.393075  | 0.757547  | 1.000      |
| 498 | GOBP-MUSCLE-CELL-DIFFERENTIATION                  | GO-0042692    | 10   | -0.366490 | -1.037740 | 0.390351  | 0.758434  | 1.000      |
| 499 | GOBP-POSITIVE-REGULATION-OF-IMMUNE-RESPONSE       | GO-0050778    | 9    | -0.373772 | -1.037740 | 0.410148  | 0.759642  | 1.000      |
| 500 | GOBP-MUSCLE-CONTRACTION                           | GO-0006936    | 5    | -0.465932 | -1.037835 | 0.406639  | 0.762860  | 1.000      |
| 501 | GOBP-ORGANIC-ACID-METABOLIC-PROCESS               | GO-0006082    | 7    | -0.408090 | -1.038076 | 0.387295  | 0.765730  | 1.000      |
| 502 | GOBP-TISSUE-HOMEOSTASIS                           | GO-0001894    | 5    | -0.463968 | -1.038352 | 0.413793  | 0.768513  | 1.000      |
| 503 | GOBP-REGULATION-OF-IMMUNE-RESPONSE                | GO-0050776    | 12   | -0.340732 | -1.039730 | 0.415556  | 0.768865  | 1.000      |
| 504 | GOBP-CELLULAR-RESPONSE-TO-PEPTIDE                 | GO-1901653    | 13   | -0.329145 | -1.040098 | 0.378788  | 0.771418  | 1.000      |
| 505 | GOBP-POSTTRANSCRIPTIONAL-REGULATION-OF-GENE-EX... | GO-0010608    | 8    | -0.392071 | -1.040296 | 0.377119  | 0.774486  | 1.000      |
| 506 | GOBP-POSITIVE-REGULATION-OF-NUCLEOBASE-CONTAIN... | GO-0045935    | 28   | -0.270192 | -1.046896 | 0.395745  | 0.763597  | 1.000      |
| 507 | GOBP-ENZYME-LINKED-RECEPTOR-PROTEIN-SIGNALING-... | GO-0007167    | 24   | -0.273827 | -1.047268 | 0.381395  | 0.766180  | 1.000      |
| 508 | GOBP-RESPONSE-TO-HORMONE                          | GO-0009725    | 20   | -0.291206 | -1.047363 | 0.387029  | 0.769450  | 1.000      |
| 509 | GOBP-CELLULAR-RESPONSE-TO-PEPTIDE-HORMONE-STIM... | GO-0071375    | 9    | -0.374362 | -1.047844 | 0.392070  | 0.771915  | 1.000      |
| 510 | GOBP-NEGATIVE-REGULATION-OF-PROTEIN-CATABOLIC-... | GO-0042177    | 5    | -0.471549 | -1.051579 | 0.385396  | 0.766584  | 1.000      |
| 511 | GOBP-PROTEIN-MODIFICATION-BY-SMALL-PROTEIN-CON... | GO-0032446    | 6    | -0.435950 | -1.053848 | 0.398374  | 0.765293  | 1.000      |
| 512 | GOBP-LYMPHOCYTE-ACTIVATION                        | GO-0046649    | 10   | -0.363932 | -1.055417 | 0.363636  | 0.765435  | 1.000      |
| 513 | REACTOME-SIGNALING-BY-RHO-GTPASES-MIRO-GTPASES... | R-RNO-9716542 | 9    | -0.382580 | -1.056650 | 0.366667  | 0.766464  | 1.000      |

Continuation of Table S7

| NAME                                                  | ID            | SIZE | ES        | NES       | NOM.p.val | FDR.q.val | FWER.p.val |
|-------------------------------------------------------|---------------|------|-----------|-----------|-----------|-----------|------------|
| 514 GOBP-NEGATIVE-REGULATION-OF-KINASE-ACTIVITY       | GO-0033673    | 5    | -0.469344 | -1.057049 | 0.388889  | 0.769239  | 1.000      |
| 515 REACTOME-TOLL-LIKE-RECEPTOR-TLR1-TLR2-CASCADE     | R-RNO-168179  | 8    | -0.404275 | -1.057248 | 0.374494  | 0.772374  | 1.000      |
| 516 GOBP-INORGANIC-ION-TRANSMEMBRANE-TRANSPORT        | GO-0098660    | 9    | -0.392302 | -1.058399 | 0.379913  | 0.773633  | 1.000      |
| 517 GOBP-CARBOHYDRATE-HOMEOSTASIS                     | GO-0033500    | 7    | -0.420198 | -1.059449 | 0.382845  | 0.774782  | 1.000      |
| 518 HALLMARK-ALLOGRAFT-REJECTION                      | M5950         | 7    | -0.419098 | -1.059857 | 0.398095  | 0.777519  | 1.000      |
| 519 REACTOME-TOLL-LIKE-RECEPTOR-CASCADES              | R-RNO-168898  | 8    | -0.404275 | -1.061902 | 0.397119  | 0.776698  | 1.000      |
| 520 GOBP-NEGATIVE-REGULATION-OF-TRANSFERASE-ACTIVITY  | GO-0051348    | 5    | -0.469344 | -1.064803 | 0.397059  | 0.774100  | 1.000      |
| 521 REACTOME-MYD88-INDEPENDENT-TLR4-CASCADE           | R-RNO-166166  | 8    | -0.404275 | -1.065823 | 0.386364  | 0.775602  | 1.000      |
| 522 REACTOME-RHO-GTPASE-EFFECTORS                     | R-RNO-195258  | 9    | -0.382580 | -1.066570 | 0.379447  | 0.777547  | 1.000      |
| 523 REACTOME-INTERLEUKIN-17-SIGNALING                 | R-RNO-448424  | 6    | -0.447398 | -1.067316 | 0.374150  | 0.779940  | 1.000      |
| 524 GOBP-MUSCLE-CELL-DEVELOPMENT                      | GO-0055001    | 5    | -0.471427 | -1.069166 | 0.373757  | 0.779466  | 1.000      |
| 525 GOBP-CELLULAR-CARBOHYDRATE-METABOLIC-PROCESS      | GO-0044262    | 5    | -0.472915 | -1.069227 | 0.346809  | 0.783131  | 1.000      |
| 526 GOBP-REGULATION-OF-SMALL-MOLECULE-METABOLIC-PR... | GO-0062012    | 9    | -0.384896 | -1.070763 | 0.344000  | 0.783572  | 1.000      |
| 527 REACTOME-RNA-POLYMERASE-II-TRANSCRIPTION          | R-RNO-73857   | 20   | -0.297121 | -1.077177 | 0.332645  | 0.772374  | 1.000      |
| 528 GOBP-POSITIVE-REGULATION-OF-MYELOID-CELL-DIFFE... | GO-0045639    | 7    | -0.426880 | -1.089351 | 0.354379  | 0.748122  | 1.000      |
| 529 GOBP-ENDOTHELIAL-CELL-MIGRATION                   | GO-0043542    | 8    | -0.413113 | -1.093696 | 0.337278  | 0.742302  | 1.000      |
| 530 GOBP-POSITIVE-REGULATION-OF-BINDING               | GO-0051099    | 6    | -0.450264 | -1.094518 | 0.346473  | 0.744404  | 1.000      |
| 531 REACTOME-SIGNALING-BY-RECEPTOR-TYROSINE-KINASES   | R-RNO-9006934 | 26   | -0.290839 | -1.095382 | 0.326531  | 0.746264  | 1.000      |
| 532 GOBP-REGULATION-OF-CELL-ADHESION                  | GO-0030155    | 13   | -0.352098 | -1.096289 | 0.353319  | 0.747944  | 1.000      |
| 533 GOBP-POSITIVE-REGULATION-OF-CELL-DIFFERENTIATION  | GO-0045597    | 27   | -0.282151 | -1.096442 | 0.326572  | 0.751471  | 1.000      |
| 534 REACTOME-INNATE-IMMUNE-SYSTEM                     | R-RNO-168249  | 16   | -0.330559 | -1.098612 | 0.331967  | 0.750533  | 1.000      |
| 535 REACTOME-TOLL-LIKE-RECEPTOR-9-TLR9-CASCADE        | R-RNO-168138  | 8    | -0.404275 | -1.099496 | 0.330578  | 0.752523  | 1.000      |
| 536 GOBP-PROTEIN-DEPHOSPHORYLATION                    | GO-0006470    | 7    | -0.443867 | -1.102257 | 0.318182  | 0.750147  | 1.000      |
| 537 GOBP-POSITIVE-REGULATION-OF-BIOSYNTHETIC-PROCESS  | GO-0009891    | 27   | -0.282950 | -1.102967 | 0.337963  | 0.752552  | 1.000      |
| 538 HALLMARK-UV-RESPONSE-UP                           | M5941         | 5    | -0.493858 | -1.104883 | 0.353783  | 0.752263  | 1.000      |
| 539 GOBP-REGULATION-OF-IMMUNE-SYSTEM-PROCESS          | GO-0002682    | 21   | -0.301268 | -1.105639 | 0.300216  | 0.754703  | 1.000      |
| 540 GOBP-BLOOD-VESSEL-ENDOTHELIAL-CELL-MIGRATION      | GO-0043534    | 8    | -0.413113 | -1.107592 | 0.325397  | 0.754224  | 1.000      |
| 541 GOBP-PROTEIN-LOCALIZATION-TO-MEMBRANE             | GO-0072657    | 13   | -0.357280 | -1.111264 | 0.319743  | 0.749675  | 1.000      |
| 542 GOBP-CELLULAR-RESPONSE-TO-INORGANIC-SUBSTANCE     | GO-0071241    | 11   | -0.370174 | -1.113550 | 0.331313  | 0.748361  | 1.000      |
| 543 GOBP-RESPONSE-TO-GROWTH-FACTOR                    | GO-0070848    | 18   | -0.320566 | -1.114251 | 0.313978  | 0.750833  | 1.000      |
| 544 GOBP-TISSUE-MORPHOGENESIS                         | GO-0048729    | 7    | -0.448841 | -1.115709 | 0.341202  | 0.751663  | 1.000      |
| 545 GOBP-TISSUE-MIGRATION                             | GO-0090130    | 9    | -0.405878 | -1.121775 | 0.314286  | 0.741900  | 1.000      |
| 546 REACTOME-INFECTIOUS-DISEASE                       | R-HSA-5663205 | 12   | -0.359778 | -1.12194  | 0.304255  | 0.745183  | 1.000      |
| 547 GOBP-DEPHOSPHORYLATION                            | GO-0016311    | 7    | -0.443867 | -1.128033 | 0.309237  | 0.736034  | 1.000      |
| 548 GOBP-MEMBRANE-PROTEIN-PROTEOLYSIS                 | GO-0033619    | 6    | -0.479058 | -1.129251 | 0.312227  | 0.737551  | 1.000      |
| 549 GOBP-NEGATIVE-REGULATION-OF-LOCOMOTION            | GO-0040013    | 5    | -0.496614 | -1.130574 | 0.295833  | 0.738519  | 1.000      |
| 550 GOBP-RESPONSE-TO-LIGHT-STIMULUS                   | GO-0009416    | 11   | -0.376255 | -1.133790 | 0.317895  | 0.735093  | 1.000      |
| 551 GOBP-REGULATION-OF-CELLULAR-PROTEIN-LOCALIZATION  | GO-1903827    | 12   | -0.373706 | -1.139122 | 0.293182  | 0.726784  | 1.000      |
| 552 GOBP-TRANSMEMBRANE-TRANSPORT                      | GO-0055085    | 27   | -0.291497 | -1.139126 | 0.289238  | 0.730977  | 1.000      |
| 553 GOBP-POSITIVE-REGULATION-OF-NEURON-DEATH          | GO-1901216    | 5    | -0.509087 | -1.143212 | 0.314815  | 0.725663  | 1.000      |
| 554 GOBP-FC-EPSILON-RECEPTOR-SIGNALING-PATHWAY        | GO-0038095    | 7    | -0.457847 | -1.145332 | 0.301518  | 0.724984  | 1.000      |
| 555 GOBP-NEGATIVE-REGULATION-OF-APOPTOTIC-SIGNALIN... | GO-2001234    | 7    | -0.459021 | -1.147099 | 0.292887  | 0.725161  | 1.000      |
| 556 GOBP-CARBOHYDRATE-METABOLIC-PROCESS               | GO-0005975    | 9    | -0.404643 | -1.147320 | 0.299401  | 0.729039  | 1.000      |



Continuation of Table S7

| NAME                                                  | ID            | SIZE | ES        | NES       | NOM.p.val | FDR.q.val | FWER.p.val |
|-------------------------------------------------------|---------------|------|-----------|-----------|-----------|-----------|------------|
| 557 GOBP-NEGATIVE-REGULATION-OF-PHOSPHORUS-METABOL... | GO-0010563    | 9    | -0.402895 | -1.147775 | 0.290456  | 0.732394  | 1.000      |
| 558 GOBP-RESPONSE-TO-BIOTIC-STIMULUS                  | GO-0009607    | 17   | -0.330958 | -1.148909 | 0.263636  | 0.734046  | 1.000      |
| 559 GOBP-RESPONSE-TO-INSULIN                          | GO-0032868    | 5    | -0.512939 | -1.150783 | 0.301969  | 0.734051  | 1.000      |
| 560 REACTOME-MAPK-TARGETS-NUCLEAR-EVENTS-MEDIATED...  | R-HSA-450282  | 5    | -0.517623 | -1.153926 | 0.301010  | 0.731214  | 1.000      |
| 561 GOBP-VASCULATURE-DEVELOPMENT                      | GO-0001944    | 17   | -0.336227 | -1.155498 | 0.272917  | 0.732012  | 1.000      |
| 562 REACTOME-DISEASES-OF-SIGNAL-TRANSDUCTION-BY_GR... | R-HSA-5663202 | 12   | -0.376227 | -1.156413 | 0.269076  | 0.734648  | 1.000      |
| 563 GOBP-CELL-CELL-JUNCTION-ASSEMBLY                  | GO-0007043    | 5    | -0.518789 | -1.158427 | 0.289628  | 0.734235  | 1.000      |
| 564 GOBP-NEGATIVE-REGULATION-OF-RESPONSE-TO-STIMULUS  | GO-0048585    | 16   | -0.342970 | -1.160829 | 0.261702  | 0.732601  | 1.000      |
| 565 GOBP-RESPONSE-TO-CYTOKINE                         | GO-0034097    | 23   | -0.317811 | -1.161548 | 0.273138  | 0.735465  | 1.000      |
| 566 GOBP-RESPONSE-TO-DRUG                             | GO-00042493   | 11   | -0.394379 | -1.162359 | 0.262821  | 0.738054  | 1.000      |
| 567 GOBP-PROTEIN-CATABOLIC-PROCESS                    | GO-0030163    | 8    | -0.437013 | -1.163100 | 0.286008  | 0.741101  | 1.000      |
| 568 GOBP-ORGANONITROGEN-COMPOUND-CATABOLIC-PROCESS    | GO-1901565    | 10   | -0.404112 | -1.167916 | 0.278373  | 0.733660  | 1.000      |
| 569 HALLMARK-EPITHELIAL-MESENCHYMAL-TRANSITION        | M5930         | 5    | -0.530086 | -1.169265 | 0.299413  | 0.734929  | 1.000      |
| 570 REACTOME-FC-EPSILON-RECEPTOR-FCER1-SIGNALING      | R-RNO-2454202 | 7    | -0.457847 | -1.173043 | 0.260870  | 0.729951  | 1.000      |
| 571 GOBP-CYTOKINE-MEDIATED-SIGNALING-PATHWAY          | GO-0019221    | 16   | -0.350068 | -1.177802 | 0.274678  | 0.722589  | 1.000      |
| 572 GOBP-REGULATION-OF-CARBOHYDRATE-METABOLIC-PROCESS | GO-0006109    | 5    | -0.529298 | -1.179125 | 0.295833  | 0.724295  | 1.000      |
| 573 GOBP-ANATOMICAL-STRUCTURE-FORMATION-INVOLVED_I... | GO-0048646    | 20   | -0.331459 | -1.181175 | 0.246888  | 0.723879  | 1.000      |
| 574 GOBP-OSTEOBLAST-DIFFERENTIATION                   | GO-0001649    | 5    | -0.528953 | -1.186429 | 0.288066  | 0.716058  | 1.000      |
| 575 GOBP-REGULATION-OF-CARBOHYDRATE-BIOSYNTHETIC_P... | GO-0043255    | 5    | -0.529298 | -1.188145 | 0.273453  | 0.716261  | 1.000      |
| 576 GOBP-POSITIVE-REGULATION-OF-DNA-BINDING-TRANSC... | GO-0051091    | 10   | -0.417960 | -1.190442 | 0.264192  | 0.715117  | 1.000      |
| 577 HALLMARK-HYPOXIA                                  | M5891         | 5    | -0.521764 | -1.193107 | 0.268537  | 0.713096  | 1.000      |
| 578 GOBP-GROWTH                                       | GO-0040007    | 14   | -0.362667 | -1.194045 | 0.217778  | 0.715498  | 1.000      |
| 579 GOBP-CARBOHYDRATE-BIOSYNTHETIC-PROCESS            | GO-0016051    | 5    | -0.529298 | -1.194274 | 0.255274  | 0.719759  | 1.000      |
| 580 GOBP-T-CELL-ACTIVATION                            | GO-0042110    | 8    | -0.439166 | -1.194497 | 0.246781  | 0.724202  | 1.000      |
| 581 GOBP-BLOOD-VESSEL-MORPHOGENESIS                   | GO-0048514    | 14   | -0.383743 | -1.201805 | 0.228512  | 0.710959  | 1.000      |
| 582 GOBP-POSITIVE-REGULATION-OF-CELL-ADHESION         | GO-0045785    | 7    | -0.470971 | -1.202342 | 0.230937  | 0.714346  | 1.000      |
| 583 GOBP-RESPONSE-TO-UV                               | GO-0009411    | 5    | -0.524583 | -1.203418 | 0.240938  | 0.716795  | 1.000      |
| 584 GOBP-CELL-CELL-JUNCTION-ORGANIZATION              | GO-0045216    | 6    | -0.503628 | -1.204850 | 0.236253  | 0.718153  | 1.000      |
| 585 GOBP-RESPONSE-TO-TUMOR-NECROSIS-FACTOR            | GO-0034612    | 7    | -0.478162 | -1.206102 | 0.253731  | 0.720159  | 1.000      |
| 586 GOBP-BIOLOGICAL-PROCESS-INVOLVED-IN-SYMBIOTIC.... | GO-004440     | 10   | -0.414804 | -1.210546 | 0.233546  | 0.714001  | 1.000      |
| 587 GOBP-CALCIUM-ION-TRANSPORT-INTO-CYTOSOL           | GO-0060402    | 7    | -0.482775 | -1.213035 | 0.253138  | 0.712839  | 1.000      |
| 588 GOBP-REGULATION-OF-DNA-BINDING-TRANSCRIPTION_F... | GO-0051090    | 16   | -0.360993 | -1.214691 | 0.236287  | 0.713508  | 1.000      |
| 589 GOBP-POSITIVE-REGULATION-OF-TRANSCRIPTION_BY_R... | GO-0045944    | 24   | -0.324072 | -1.217251 | 0.188437  | 0.711888  | 1.000      |
| 590 GOBP-GENERATION-OF-PRECURSOR-METABOLITES-AND-E... | GO-0006091    | 5    | -0.540143 | -1.218163 | 0.247401  | 0.714738  | 1.000      |
| 591 GOBP-NEGATIVE-REGULATION-OF-NUCLEOBASE-CONTAIN... | GO-0045934    | 13   | -0.388176 | -1.220782 | 0.214912  | 0.713221  | 1.000      |
| 592 REACTOME-CELLULAR-SENESCENCE                      | R-RNO-2559583 | 6    | -0.520283 | -1.224770 | 0.250000  | 0.708187  | 1.000      |
| 593 GOBP-SMOOTH-MUSCLE-CELL-PROLIFERATION             | GO-0048659    | 6    | -0.502625 | -1.226034 | 0.234216  | 0.712949  | 1.000      |
| 594 GOBP-CARDIAC-MUSCLE-TISSUE-DEVELOPMENT            | GO-0048738    | 6    | -0.517251 | -1.225409 | 0.247951  | 0.717445  | 1.000      |
| 595 GOBP-CIRCULATORY-SYSTEM-DEVELOPMENT               | GO-0072359    | 21   | -0.342821 | -1.226122 | 0.204167  | 0.721104  | 1.000      |
| 596 GOBP-ANION-TRANSMEMBRANE-TRANSPORT                | GO-0098656    | 7    | -0.494550 | -1.229908 | 0.216769  | 0.716618  | 1.000      |
| 597 GOBP-IMMUNE-EFFECTOR-PROCESS                      | GO-0002252    | 11   | -0.409554 | -1.230782 | 0.210989  | 0.719990  | 1.000      |
| 598 GOBP-REGULATION-OF-CELL-CYCLE                     | GO-0051726    | 13   | -0.387077 | -1.234892 | 0.210412  | 0.714926  | 1.000      |
| 599 GOBP-CALCIUM-ION-TRANSMEMBRANE-TRANSPORT          | GO-0070588    | 7    | -0.482775 | -1.238704 | 0.223762  | 0.710275  | 1.000      |

Continuation of Table S7

| NAME | ID                                                | SIZE           | ES | NES       | NOM.p.val | FDR.q.val | FWER.p.val |
|------|---------------------------------------------------|----------------|----|-----------|-----------|-----------|------------|
| 600  | GOBP-HEART_DEVELOPMENT                            | GO-0007507     | 6  | -0.517251 | -1.239939 | 0.209205  | 0.712925   |
| 601  | REACTOME-SENESCENCE-ASSOCIATED-SECRETORY-PHENO... | R-RNO-2559582  | 6  | -0.520283 | -1.240168 | 0.210204  | 0.717999   |
| 602  | GOBP-MORPHOGENESIS-OF-AN-EPITHELIUM               | GO-0002009     | 6  | -0.521096 | -1.243535 | 0.223790  | 0.715126   |
| 603  | GOBP-NEGATIVE-REGULATION-OF-PROTEOLYSIS           | GO-0045861     | 8  | -0.477530 | -1.245738 | 0.213531  | 0.715072   |
| 604  | GOBP-CYTOSOLIC-CALCIUM-ION-TRANSPORT              | GO-0060401     | 7  | -0.482775 | -1.247522 | 0.210526  | 0.716020   |
| 605  | GOBP-NEGATIVE-REGULATION-OF-HYDROLASE-ACTIVITY    | GO-0051346     | 11 | -0.420789 | -1.248377 | 0.203947  | 0.719563   |
| 606  | GOBP-LIPID-METABOLIC-PROCESS                      | GO-0006629     | 10 | -0.441926 | -1.249168 | 0.200855  | 0.723370   |
| 607  | GOBP-REGULATION-OF-WNT-SIGNALING-PATHWAY          | GO-0030111     | 5  | -0.565248 | -1.251328 | 0.226891  | 0.723427   |
| 608  | REACTOME-LEISHMANIA-INFECTION                     | R-HSA-96558195 | 10 | -0.427030 | -1.251585 | 0.191176  | 0.728936   |
| 609  | GOBP-MACROMOLECULE-CATABOLIC-PROCESS              | GO-0009057     | 11 | -0.425265 | -1.253382 | 0.200413  | 0.730194   |
| 610  | GOBP-FC-RECEPTOR-SIGNALING-PATHWAY                | GO-0038093     | 8  | -0.478834 | -1.253430 | 0.185950  | 0.736469   |
| 611  | GOBP-RESPONSE-TO-ORGANIC-CYCLIC-COMPOUND          | GO-0014070     | 20 | -0.353629 | -1.254105 | 0.197368  | 0.740998   |
| 612  | GOBP-CELLULAR-RESPONSE-TO-EXTERNAL-STIMULUS       | GO-0071496     | 10 | -0.442476 | -1.256419 | 0.203285  | 0.740795   |
| 613  | GOBP-MUSCLE-CELL-PROLIFERATION                    | GO-0033002     | 8  | -0.484818 | -1.261805 | 0.171843  | 0.731964   |
| 614  | GOBP-POLYSACCHARIDE-METABOLIC-PROCESS             | GO-0005976     | 5  | -0.569708 | -1.263789 | 0.185031  | 0.727453   |
| 615  | GOBP-NEGATIVE-REGULATION-OF-PROTEIN-MODIFICATI... | GO-0031400     | 10 | -0.449880 | -1.281380 | 0.179654  | 0.690051   |
| 616  | GOBP-REGULATION-OF-ANATOMICAL-STRUCTURE-SIZE      | GO-0090066     | 10 | -0.445457 | -1.281516 | 0.190678  | 0.699836   |
| 617  | GOBP-IMMUNE-RESPONSE-REGULATING-SIGNALING-PATHWAY | GO-000276      | 8  | -0.478834 | -1.282527 | 0.190377  | 0.701377   |
| 618  | GOBP-RESPIRATORY-SYSTEM-DEVELOPMENT               | GO-0060541     | 6  | -0.53856  | -1.284334 | 0.190476  | 0.703879   |
| 619  | GOBP-CELL-CYCLE                                   | GO-0007049     | 21 | -0.349020 | -1.286035 | 0.165198  | 0.709356   |
| 620  | GOBP-PROTEIN-LOCALIZATION-TO-CELL-JUNCTION        | GO-1902414     | 6  | -0.539079 | -1.286454 | 0.193548  | 0.709356   |
| 621  | GOBP-RESPONSE-TO-ABIOTIC-STIMULUS                 | GO-0009628     | 27 | -0.337552 | -1.288025 | 0.142857  | 0.711664   |
| 622  | GOBP-MONONUCLEAR-CELL-DIFFERENTIATION             | GO-1903131     | 7  | -0.491649 | -1.295420 | 0.183299  | 0.697773   |
| 623  | GOBP-EPIDERMIS-DEVELOPMENT                        | GO-0008544     | 5  | -0.591297 | -1.299997 | 0.172269  | 0.691564   |
| 624  | REACTOME-DEATH-RECEPTOR-SIGNALING                 | R-RNO-73887    | 5  | -0.570238 | -1.301921 | 0.184000  | 0.692282   |
| 625  | GOBP-POSITIVE-REGULATION-OF-IMMUNE-SYSTEM-PROCESS | GO-0002684     | 18 | -0.370201 | -1.310298 | 0.155844  | 0.676022   |
| 626  | GOBP-REGULATION-OF-APOPTOTIC-SIGNALING-PATHWAY    | GO-2001233     | 10 | -0.448022 | -1.311844 | 0.168085  | 0.678786   |
| 627  | GOBP-RESPONSE-TO-MOLECULE-OF-BACTERIAL-ORIGIN     | GO-0002237     | 13 | -0.414004 | -1.311908 | 0.141962  | 0.685612   |
| 628  | GOBP-EMBRYO-DEVELOPMENT-ENDING-IN-BIRTH-OR-EGG... | GO-0009792     | 9  | -0.486696 | -1.314993 | 0.162698  | 0.684204   |
| 629  | GOBP-APOPTOTIC-SIGNALING-PATHWAY                  | GO-0097190     | 15 | -0.408208 | -1.315730 | 0.138075  | 0.689218   |
| 630  | GOBP-GLUCOSE-METABOLIC-PROCESS                    | GO-0006006     | 6  | -0.551188 | -1.322651 | 0.154661  | 0.678137   |
| 631  | GOBP-NEGATIVE-REGULATION-OF-PROTEIN-METABOLIC-... | GO-0051248     | 20 | -0.370325 | -1.323908 | 0.127835  | 0.682022   |
| 632  | GOBP-MONOSACCHARIDE-METABOLIC-PROCESS             | GO-0005996     | 6  | -0.551188 | -1.331230 | 0.172211  | 0.668270   |
| 633  | GOBP-REGULATION-OF-ORGAN-GROWTH                   | GO-0046620     | 5  | -0.589085 | -1.335141 | 0.159509  | 0.663790   |
| 634  | GOBP-DEVELOPMENTAL-GROWTH                         | GO-0048589     | 10 | -0.466972 | -1.338962 | 0.158730  | 0.659872   |
| 635  | GOBP-RESPONSE-TO-BACTERIUM                        | GO-0009617     | 13 | -0.414004 | -1.339566 | 0.136364  | 0.665467   |
| 636  | GOBP-ORGAN-GROWTH                                 | GO-0035265     | 5  | -0.589085 | -1.344123 | 0.136170  | 0.659775   |
| 637  | GOBP-NEGATIVE-REGULATION-OF-CATALYTIC-ACTIVITY    | GO-0043086     | 17 | -0.397651 | -1.344544 | 0.122318  | 0.665965   |
| 638  | GOBP-STRIATED-MUSCLE-CELL-DIFFERENTIATION         | GO-0051146     | 9  | -0.490181 | -1.345129 | 0.136268  | 0.672057   |
| 639  | GOBP-EMBRYONIC-ORGAN-DEVELOPMENT                  | GO-0048458     | 7  | -0.529455 | -1.345221 | 0.139442  | 0.679514   |
| 640  | GOBP-MITOCHONDRION-ORGANIZATION                   | GO-0007005     | 7  | -0.538929 | -1.346241 | 0.160000  | 0.684583   |
| 641  | GOBP-ACTIVATION-OF-IMMUNE-RESPONSE                | GO-0002253     | 5  | -0.609398 | -1.347338 | 0.140787  | 0.689059   |
| 642  | GOBP-SKIN-DEVELOPMENT                             | GO-0043588     | 5  | -0.608173 | -1.350117 | 0.151394  | 0.680062   |

Continuation of Table S7

| NAME                                                  | ID            | SIZE | ES        | NES       | NOM.p.val | FDR.q.val | FWER.p.val |
|-------------------------------------------------------|---------------|------|-----------|-----------|-----------|-----------|------------|
| 643 GOBP-NEGATIVE-REGULATION-OF-BIOSYNTHETIC-PROCESS  | GO-0009890    | 13   | -0.437255 | -1.353876 | 0.125532  | 0.685923  | 1.000      |
| 644 GOBP-NEGATIVE-REGULATION-OF-CATABOLIC-PROCESS     | GO-0009895    | 8    | -0.510338 | -1.355736 | 0.121535  | 0.688937  | 1.000      |
| 645 GOBP-REGULATION-OF-PROTEIN-CATABOLIC-PROCESS      | GO-0042176    | 7    | -0.526907 | -1.357839 | 0.130802  | 0.691271  | 1.000      |
| 646 GOBP-REGULATION-OF-CATABOLIC-PROCESS              | GO-0009894    | 13   | -0.432226 | -1.358588 | 0.127119  | 0.698141  | 1.000      |
| 647 GOBP-NEGATIVE-REGULATION-OF-INTRACELLULAR-SIGN... | GO-1902532    | 7    | -0.533457 | -1.363170 | 0.136264  | 0.692992  | 1.000      |
| 648 GOBP-APOPTOTIC-MITOCHONDRIAL-CHANGES              | GO-0008637    | 6    | -0.579419 | -1.368273 | 0.152220  | 0.687266  | 1.000      |
| 649 GOBP-CELL-CELL-ADHESION                           | GO-0098609    | 14   | -0.416022 | -1.369775 | 0.111597  | 0.691535  | 1.000      |
| 650 GOBP-POSITIVE-REGULATION-OF-CELL-DEATH            | GO-0010942    | 19   | -0.385208 | -1.369989 | 0.117914  | 0.700135  | 1.000      |
| 651 GOBP-RESPONSE-TO-METAL-ION                        | GO-0010038    | 15   | -0.416804 | -1.373779 | 0.111588  | 0.697334  | 1.000      |
| 652 HALMARK-TNFA-SIGNALING-VIA-NFKB                   | M5890         | 14   | -0.438501 | -1.376416 | 0.128151  | 0.698010  | 1.000      |
| 653 GOBP-RESPONSE-TO-CADMIUM-ION                      | GO-0046686    | 6    | -0.573837 | -1.379685 | 0.135628  | 0.698165  | 1.000      |
| 654 GOBP-LEUKOCYTE-CELL-CELL-ADHESION                 | GO-0007159    | 6    | -0.580612 | -1.381186 | 0.126253  | 0.703336  | 1.000      |
| 655 GOBP-RAS-PROTEIN-SIGNAL-TRANSDUCTION              | GO-0007265    | 5    | -0.617564 | -1.384816 | 0.125000  | 0.700912  | 1.000      |
| 656 GOBP-REGULATION-OF-GROWTH                         | GO-0040008    | 13   | -0.433207 | -1.392815 | 0.106522  | 0.685317  | 1.000      |
| 657 GOBP-TUBE-DEVELOPMENT                             | GO-0035295    | 18   | -0.390908 | -1.393722 | 0.095745  | 0.692562  | 1.000      |
| 658 GOBP-EPITHELIUM-DEVELOPMENT                       | GO-0060429    | 15   | -0.427629 | -1.401216 | 0.097458  | 0.679332  | 1.000      |
| 659 GOBP-NEGATIVE-REGULATION-OF-PEPTIDASE-ACTIVITY    | GO-0010466    | 6    | -0.585469 | -1.401791 | 0.112245  | 0.687830  | 1.000      |
| 660 GOBP-REGULATION-OF-PROTEIN-LOCALIZATION-TO-MEM... | GO-1905475    | 7    | -0.547828 | -1.401816 | 0.116935  | 0.698316  | 1.000      |
| 661 GOBP-RESPONSE-TO-INORGANIC-SUBSTANCE              | GO-0010035    | 19   | -0.399930 | -1.403198 | 0.076253  | 0.704564  | 1.000      |
| 662 GOBP-REGULATION-OF-ANION-TRANSMEMBRANE-TRANSPORT  | GO-0010035    | 5    | -0.638373 | -1.413985 | 0.115914  | 0.680861  | 1.000      |
| 663 HALMARK-P13K-AKT-MTOR-SIGNALING                   | GO-1903959    | 6    | -0.595923 | -1.417757 | 0.114053  | 0.680041  | 1.000      |
| 664 GOBP-DEVELOPMENTAL-CELL-GROWTH                    | M5923         | 5    | -0.646082 | -1.417794 | 0.095918  | 0.691151  | 1.000      |
| 665 GOBP-REGULATION-OF-CELLULAR-AMIDE-METABOLIC-PR... | GO-0034248    | 9    | -0.500525 | -1.417989 | 0.086498  | 0.701975  | 1.000      |
| 666 GOBP-RESPONSE-TO-RADIATION                        | GO-0009314    | 13   | -0.441499 | -1.419133 | 0.103926  | 0.710117  | 1.000      |
| 667 GOBP-NEGATIVE-REGULATION-OF-TRANSMEMBRANE-TRAN... | GO-0034763    | 6    | -0.585290 | -1.422206 | 0.104167  | 0.712038  | 1.000      |
| 668 GOBP-MATERNAL-PROCESS-INVOLVED-IN-FEMALE-PREGN... | GO-0060135    | 5    | -0.630643 | -1.422640 | 0.095041  | 0.723020  | 1.000      |
| 669 GOBP-NEGATIVE-REGULATION-OF-TRANSCRIPTION-BY-R... | GO-0000122    | 10   | -0.486197 | -1.422709 | 0.085339  | 0.735710  | 1.000      |
| 670 REACTOME-CYTOKINE-SIGNALING-IN-IMMUNE-SYSTEM      | R-RNO-1280215 | 21   | -0.390135 | -1.427272 | 0.067391  | 0.733226  | 1.000      |
| 671 REACTOME-TRANSCRIPTIONAL-REGULATION-BY-TP53       | R-RNO-3700989 | 6    | -0.598846 | -1.432778 | 0.113734  | 0.726744  | 1.000      |
| 672 REACTOME-ESTROGEN-DEPENDENT-NUCLEAR-EVENTS-DOW... | R-RNO-9634638 | 5    | -0.646414 | -1.437984 | 0.083658  | 0.719940  | 1.000      |
| 673 GOBP-NEGATIVE-REGULATION-OF-MOLECULAR-FUNCTION    | GO-0044092    | 24   | -0.383490 | -1.438915 | 0.064103  | 0.729941  | 1.000      |
| 674 GOBP-RESPONSE-TO-OXIDATIVE-STRESS                 | GO-0006979    | 8    | -0.537564 | -1.448055 | 0.094456  | 0.711033  | 1.000      |
| 675 GOBP-RESPONSE-TO-REACTIVE-OXYGEN-SPECIES          | GO-0000302    | 8    | -0.537564 | -1.452429 | 0.096311  | 0.709326  | 1.000      |
| 676 GOBP-POSITIVE-REGULATION-OF-DEVELOPMENTAL-GROWTH  | GO-0048639    | 8    | -0.547288 | -1.453682 | 0.082474  | 0.719063  | 1.000      |
| 677 GOBP-CELL-GROWTH                                  | GO-0016049    | 10   | -0.495758 | -1.460859 | 0.082136  | 0.707137  | 1.000      |
| 678 GOBP-POSITIVE-REGULATION-OF-GROWTH                | GO-00445927   | 9    | -0.536625 | -1.463954 | 0.090909  | 0.711907  | 1.000      |
| 679 GOBP-CELLULAR-RESPONSE-TO-CADMIUM-ION             | GO-0071276    | 5    | -0.637243 | -1.465920 | 0.078556  | 0.720059  | 1.000      |
| 680 GOBP-TUBE-MORPHOGENESIS                           | GO-0035239    | 15   | -0.439513 | -1.478317 | 0.063291  | 0.689578  | 1.000      |
| 681 GOBP-CELLULAR-LIPID-METABOLIC-PROCESS             | GO-0044255    | 7    | -0.580407 | -1.489710 | 0.072835  | 0.664708  | 1.000      |
| 682 GOBP-CELLULAR-RESPONSE-TO-CHEMICAL-STRESS         | GO-0062197    | 7    | -0.587323 | -1.504229 | 0.073996  | 0.631122  | 1.000      |
| 683 GOBP-NEGATIVE-REGULATION-OF-CYSTEINE-TYPE-ENDO... | GO-2000117    | 5    | -0.662376 | -1.504634 | 0.057940  | 0.644852  | 1.000      |
| 684 GOBP-CELLULAR-RESPONSE-TO-REACTIVE-OXYGEN-SPECIES | GO-0034614    | 7    | -0.587323 | -1.507702 | 0.069530  | 0.649586  | 1.000      |
| 685 GOBP-LEUKOCYTE-MIGRATION                          | GO-0050900    | 6    | -0.631875 | -1.510705 | 0.069388  | 0.654676  | 1.000      |

Continuation of Table S7

| NAME | ID                                                | SIZE | ES        | NES       | NOM.p.val | FDR.q.val | FWER.p.val |
|------|---------------------------------------------------|------|-----------|-----------|-----------|-----------|------------|
| 686  | GOBP-NEGATIVE-REGULATION-OF-BINDING               | 6    | -0.622556 | -1.512076 | 0.066000  | 0.666636  | 1.000      |
| 687  | GOBP-RESPONSE.TO.EXTRACELLULAR.STIMULUS           | 13   | -0.467150 | -1.519617 | 0.058065  | 0.656393  | 1.000      |
| 688  | GOBP-PROTEIN.LOCALIZATION.TO.CELL.PERIPHERY       | 12   | -0.496423 | -1.520347 | 0.055666  | 0.671493  | 1.000      |
| 689  | REACTOME-EXTRA.NUCLEAR.ESTROGEN-SIGNALING         | 7    | -0.607930 | -1.523406 | 0.062745  | 0.679231  | 1.000      |
| 690  | GOBP-MULTI.MULTICELLULAR-ORGANISM-PROCESS         | 8    | -0.557755 | -1.525546 | 0.062366  | 0.690202  | 1.000      |
| 691  | GOBP-HOMEOSTASIS-OF.NUMBER-OF.CELLS               | 5    | -0.685487 | -1.536664 | 0.058943  | 0.666886  | 1.000      |
| 692  | GOBP-REGULATION-OF-CELLULAR-COMPONENT-SIZE        | 7    | -0.603828 | -1.545356 | 0.054167  | 0.654699  | 1.000      |
| 693  | GOBP-PEPTIDE.BIOSYNTHETIC-PROCESS                 | 6    | -0.639139 | -1.553564 | 0.047414  | 0.643668  | 1.000      |
| 694  | GOBP-AMIDE.BIOSYNTHETIC-PROCESS                   | 6    | -0.639139 | -1.554288 | 0.050201  | 0.661663  | 1.000      |
| 695  | GOBP-GLAND.DEVELOPMENT                            | 7    | -0.625519 | -1.561354 | 0.055985  | 0.656445  | 1.000      |
| 696  | GOBP-IMPORT-INTO-CELL                             | 6    | -0.646326 | -1.563310 | 0.048583  | 0.671175  | 1.000      |
| 697  | GOBP-REGULATION-OF-PROTEIN.LOCALIZATION.TO.CEL... | 6    | -0.659548 | -1.569864 | 0.051181  | 0.668626  | 1.000      |
| 698  | GOBP-PROTEIN.LOCALIZATION.TO.PLASMA-MEMBRANE      | 7    | -0.629465 | -1.578859 | 0.036893  | 0.655763  | 1.000      |
| 699  | GOBP-POSITIVE-REGULATION-OF-PRL-MIRNA-TRANSCRI... | 7    | -0.628178 | -1.584943 | 0.041754  | 0.655981  | 1.000      |
| 700  | GOBP-PEPTIDE-METABOLIC-PROCESS                    | 11   | -0.533437 | -1.587809 | 0.033543  | 0.669259  | 1.000      |
| 701  | GOBP-POSITIVE-REGULATION-OF-SMOOTH-MUSCLE-CELL... | 5    | -0.715656 | -1.593259 | 0.039014  | 0.673200  | 1.000      |
| 702  | GOBP-POSITIVE-REGULATION-OF-CELL-CELL-ADHESION    | 5    | -0.717485 | -1.601114 | 0.027837  | 0.670864  | 1.000      |
| 703  | REACTOME-PTEN-REGULATION                          | 5    | -0.711920 | -1.602902 | 0.036217  | 0.693613  | 1.000      |
| 704  | GOBP-PRL-MIRNA-TRANSCRIPTION-BY-RNA-POLYMERASE-II | 7    | -0.628178 | -1.608056 | 0.041841  | 0.702654  | 1.000      |
| 705  | GOBP-RESPONSE.TO.NUTRIENT                         | 5    | -0.725790 | -1.608398 | 0.036364  | 0.736059  | 1.000      |
| 706  | GOBP-POSITIVE-REGULATION-OF-LEUKOCYTE-CELL-CEL... | 5    | -0.717485 | -1.609459 | 0.028112  | 0.770410  | 1.000      |
| 707  | GOBP-REGULATION-OF-PROTEIN-BINDING                | 7    | -0.630009 | -1.613016 | 0.032000  | 0.794032  | 1.000      |
| 708  | GOBP-IN-UTERO-EMBRYONIC-DEVELOPMENT               | 8    | -0.606849 | -1.613797 | 0.034632  | 0.835592  | 1.000      |
| 709  | GOBP-REGULATION-OF-DEVELOPMENTAL-GROWTH           | 9    | -0.583251 | -1.615060 | 0.037773  | 0.880631  | 1.000      |
| 710  | HALLMARK-APOPTOSIS                                | 6    | -0.673505 | -1.620250 | 0.030242  | 0.910137  | 1.000      |
| 711  | GOBP-SPROUTING-ANGIOGENESIS                       | 5    | -0.719135 | -1.623936 | 0.026804  | 0.955039  | 1.000      |
| 712  | GOBP-REGULATION-OF-EXTRINSIC-APOPTOTIC-SIGNALI... | 6    | -0.686321 | -1.624386 | 0.018557  | 1.000000  | 1.000      |
| 713  | GOBP-AGING                                        | 13   | -0.519766 | -1.636957 | 0.028630  | 1.000000  | 1.000      |
| 714  | REACTOME-SIGNALING-BY-INTERLEUKINS                | 15   | -0.502410 | -1.638089 | 0.035197  | 1.000000  | 1.000      |
| 715  | GOBP-ENDOCRINE-SYSTEM-DEVELOPMENT                 | 6    | -0.699680 | -1.661875 | 0.028513  | 1.000000  | 1.000      |
| 716  | GOBP-REGULATION-OF-CELL-SIZE                      | 5    | -0.755216 | -1.662006 | 0.026804  | 1.000000  | 1.000      |
| 717  | GOBP-REGULATION-OF-BINDING                        | 11   | -0.559021 | -1.662269 | 0.028986  | 1.000000  | 1.000      |
| 718  | REACTOME-ESR-MEDIATED-SIGNALING                   | 8    | -0.644575 | -1.694483 | 0.026477  | 1.000000  | 1.000      |
| 719  | REACTOME-SIGNALING-BY-NUCLEAR-RECEPTORS           | 8    | -0.644575 | -1.723517 | 0.014403  | 1.000000  | 0.995      |
| 720  | GOBP-EXTRINSIC-APOPTOTIC-SIGNALING-PATHWAY        | 7    | -0.690277 | -1.734438 | 0.014706  | 1.000000  | 0.989      |
| 721  | GOBP-POSITIVE-REGULATION-OF-CELL-GROWTH           | 6    | -0.755612 | -1.774435 | 0.002049  | 1.000000  | 0.972      |
| 722  | GOBP-CELLULAR-AMIDE-METABOLIC-PROCESS             | 12   | -0.566680 | -1.774934 | 0.006342  | 1.000000  | 0.972      |
| 723  | REACTOME-INTERLEUKIN-4-AND-INTERLEUKIN-13-SIGN... | 8    | -0.687500 | -1.818746 | 0.010121  | 1.000000  | 0.928      |
| 724  | GOBP-RESPONSE.TO-MECHANICAL-STIMULUS              | 6    | -0.773717 | -1.850761 | 0.000000  | 1.000000  | 0.862      |

End of Table

**Supplementary Table S8:** SC cervical segment early profile (1 DPL peak) GSEA results.

| Begin of Table S8 |                                                             |               |      |          |          |           |           |            |  |
|-------------------|-------------------------------------------------------------|---------------|------|----------|----------|-----------|-----------|------------|--|
|                   | NAME                                                        | ID            | SIZE | ES       | NES      | NOM.p.val | FDR.q.val | FWER.p.val |  |
| 0                 | GOBP-RESPONSE.TO.LIGHT.STIMULUS                             | GO-0009416    | 11   | 0.731334 | 2.024651 | 0.000000  | 0.156407  | 0.142      |  |
| 1                 | GOBP-PROTEIN.CONTAINING.COMPLEX.SUBUNIT.ORGANELLAR          | GO-0043933    | 15   | 0.663449 | 1.974649 | 0.003026  | 0.160386  | 0.267      |  |
| 2                 | GOBP-MEMORY                                                 | GO-0007613    | 13   | 0.673529 | 1.937396 | 0.000000  | 0.165605  | 0.381      |  |
| 3                 | GOBP-REGULATION.OF.BINDING                                  | GO-0051098    | 11   | 0.705199 | 1.920197 | 0.000000  | 0.158111  | 0.456      |  |
| 4                 | GOBP-REGULATION.OF.PROTEIN.BINDING                          | GO-0043393    | 7    | 0.809960 | 1.910167 | 0.003284  | 0.141292  | 0.497      |  |
| 5                 | GOBP-INFLAMMATORY-RESPONSE                                  | GO-0006954    | 12   | 0.654238 | 1.886026 | 0.000000  | 0.152717  | 0.584      |  |
| 6                 | GOBP-RESPONSE.TO.RADIATION                                  | GO-0009314    | 13   | 0.639975 | 1.882968 | 0.001608  | 0.135849  | 0.595      |  |
| 7                 | GOBP-RESPONSE.TO.NERVE.GROWTH.FACTOR                        | GO-1990089    | 7    | 0.776983 | 1.854240 | 0.003241  | 0.161113  | 0.692      |  |
| 8                 | REACTOME.INTERLEUKIN-4.AND.INTERLEUKIN-13.SIGNALING         | R-RNO-6785807 | 8    | 0.719360 | 1.810831 | 0.003236  | 0.221923  | 0.853      |  |
| 9                 | GOBP-POSITIVE.REGULATION.OF.BINDING                         | GO-0051099    | 6    | 0.746774 | 1.714130 | 0.008264  | 0.504614  | 0.996      |  |
| 10                | GOBP-CYTOKINE-MEDIATED.SIGNALING.PATHWAY                    | GO-0019221    | 16   | 0.553707 | 1.702685 | 0.013235  | 0.507436  | 0.996      |  |
| 11                | GOBP-REGULATION.OF.NEURON.DIFFERENTIATION                   | GO-0045664    | 5    | 0.778648 | 1.693701 | 0.017974  | 0.499902  | 0.996      |  |
| 12                | GOBP-NEGATIVE.REGULATION.OF.PEPTIDASE-ACTIVITY              | GO-0010466    | 6    | 0.718984 | 1.653030 | 0.017857  | 0.649190  | 0.999      |  |
| 13                | REACTOME.SIGNALING.BY.INTERLEUKINS                          | R-RNO-449147  | 15   | 0.546048 | 1.634720 | 0.020772  | 0.697544  | 0.999      |  |
| 14                | REACTOME.CYTOKINE.SIGNALING.IN.IMMUNE.SYSTEM                | R-RNO-1280215 | 21   | 0.487838 | 1.625963 | 0.030726  | 0.698163  | 1.000      |  |
| 15                | GOBP-NEGATIVE.REGULATION.OF.MOLECULAR.FUNCTION              | GO-0044092    | 24   | 0.481572 | 1.622320 | 0.025373  | 0.673187  | 1.000      |  |
| 16                | GOBP-EPITHELIAL-CELL.DIFFERENTIATION                        | GO-0030855    | 7    | 0.679012 | 1.620021 | 0.024958  | 0.645223  | 1.000      |  |
| 17                | GOBP-NEGATIVE.REGULATION.OF.BINDING                         | GO-0051100    | 6    | 0.709012 | 1.611042 | 0.021173  | 0.653762  | 1.000      |  |
| 18                | GOBP-CELLULAR.COMPONENT.DISASSEMBLY                         | GO-0022411    | 6    | 0.706912 | 1.608042 | 0.025000  | 0.632488  | 1.000      |  |
| 19                | GOBP-POSITIVE.REGULATION.OF.PEPTIDYL-SERINE.PHOSPHORYLATION | GO-0033138    | 8    | 0.639284 | 1.601790 | 0.030596  | 0.630937  | 1.000      |  |
| 20                | GOBP-REGULATION.OF.LIPID.METABOLIC.PROCESS                  | GO-0019216    | 7    | 0.661304 | 1.593920 | 0.025907  | 0.639143  | 1.000      |  |
| 21                | GOBP-REGULATION.OF.CELLULAR.COMPONENT.SIZE                  | GO-0032535    | 7    | 0.663806 | 1.593518 | 0.023659  | 0.612050  | 1.000      |  |
| 22                | GOBP-REGULATION.OF.OSTEOCLAST.DIFFERENTIATION               | GO-0045670    | 5    | 0.734940 | 1.589716 | 0.027350  | 0.601488  | 1.000      |  |
| 23                | GOBP-RECEPTOR-MEDIATED.ENDOCYTOSIS                          | GO-0006898    | 6    | 0.686854 | 1.585166 | 0.026981  | 0.596329  | 1.000      |  |
| 24                | GOBP-REGULATION.OF.PROTEIN.LOCALIZATION.TO.MEMBRANE         | GO-1905475    | 7    | 0.666355 | 1.584227 | 0.033708  | 0.576909  | 1.000      |  |
| 25                | GOBP-REGULATION.OF.PEPTIDYL-SERINE.PHOSPHORYLATION          | GO-0033135    | 8    | 0.639284 | 1.573723 | 0.035439  | 0.597143  | 1.000      |  |
| 26                | GOBP-POSITIVE.REGULATION.OF.CELL.DEATH                      | GO-0010942    | 19   | 0.491058 | 1.568551 | 0.047407  | 0.597376  | 1.000      |  |
| 27                | GOBP-OSTEOCLAST.DIFFERENTIATION                             | GO-0030316    | 6    | 0.682927 | 1.561724 | 0.038898  | 0.605323  | 1.000      |  |
| 28                | GOBP.MULTICELLULAR.ORGANISM.PROCESS                         | GO-0044706    | 8    | 0.609696 | 1.553119 | 0.035256  | 0.622344  | 1.000      |  |
| 29                | GOBP-REGULATION.OF.PEPTIDASE-ACTIVITY                       | GO-0052547    | 10   | 0.573977 | 1.529107 | 0.034591  | 0.707040  | 1.000      |  |
| 30                | GOBP-RESPONSE.TO.UV                                         | GO-0009411    | 5    | 0.696333 | 1.496278 | 0.035000  | 0.848450  | 1.000      |  |
| 31                | GOBP-RESPONSE.TO.METAL-ION                                  | GO-0010038    | 15   | 0.493430 | 1.489503 | 0.060423  | 0.859173  | 1.000      |  |
| 32                | GOBP-PROTEIN.COMPLEX.OLIGOMERIZATION                        | GO-0051259    | 7    | 0.623111 | 1.488133 | 0.062500  | 0.840821  | 1.000      |  |
| 33                | GOBP-REGULATION.OF.PROTEIN.LOCALIZATION.TO.CELLULAR         | GO-1904375    | 6    | 0.651848 | 1.485393 | 0.051282  | 0.830233  | 1.000      |  |
| 34                | GOBP-AGING                                                  | GO-0007568    | 13   | 0.509943 | 1.484576 | 0.046828  | 0.810366  | 1.000      |  |
| 35                | GOBP.LONG-TERM.SYNAPTIC.DEPRESSION                          | GO-0060292    | 5    | 0.690196 | 1.478621 | 0.041806  | 0.818449  | 1.000      |  |
| 36                | GOBP.INTRINSIC.APOPTOTIC.SIGNALING.PATHWAY                  | GO-0097193    | 5    | 0.695569 | 1.475786 | 0.048093  | 0.809136  | 1.000      |  |
| 37                | GOBP-REGULATION.OF.CELL.DEATH                               | GO-0010941    | 34   | 0.405518 | 1.475658 | 0.047757  | 0.788345  | 1.000      |  |
| 38                | GOBP-POSITIVE.REGULATION.OF.TRANSPORT                       | GO-0051050    | 26   | 0.432714 | 1.475257 | 0.060172  | 0.769975  | 1.000      |  |
| 39                | GOBP-NEGATIVE.REGULATION.OF.LIPID.METABOLIC.PROCESS         | GO-0045833    | 5    | 0.680186 | 1.457372 | 0.056995  | 0.835328  | 1.000      |  |
| 40                | GOBP-NEGATIVE.REGULATION.OF.TRANSMEMBRANE-TRANSPORT         | GO-0034763    | 6    | 0.644586 | 1.452012 | 0.064620  | 0.841271  | 1.000      |  |

Continuation of Table S8

| NAME                                                 | ID            | SIZE | ES       | NES      | NOM.p.val | FDR.q.val | FWER.p.val |
|------------------------------------------------------|---------------|------|----------|----------|-----------|-----------|------------|
| 41 GOBP-DEFENSE.RESPONSE                             | GO-0006952    | 19   | 0.448065 | 1.440478 | 0.078669  | 0.877577  | 1.000      |
| 42 REACTOME.SIGNALING.BY.RECEPTOR.TYROSINE.KINASES   | R-RNO-9006934 | 26   | 0.423263 | 1.432083 | 0.071756  | 0.898062  | 1.000      |
| 43 GOBP-CELLULAR.RESPONSE.TO.ABIOTIC.STIMULUS        | GO-0071214    | 7    | 0.607824 | 1.424489 | 0.076800  | 0.915661  | 1.000      |
| 44 GOBP-LONG-TERM.MEMORY                             | GO-0007616    | 6    | 0.626814 | 1.417558 | 0.090150  | 0.931756  | 1.000      |
| 45 GOBP-NEGATIVE.REGULATION.OF.CYSTEINE.TYPE.ENDO... | GO-2000117    | 5    | 0.666466 | 1.414575 | 0.060504  | 0.927070  | 1.000      |
| 46 GOBP-RESPONSE.TO.INORGANIC.SUBSTANCE              | GO-0010035    | 19   | 0.442936 | 1.413843 | 0.075893  | 0.910832  | 1.000      |
| 47 GOBP-RECEPTOR.METABOLIC.PROCESS                   | GO-0043112    | 5    | 0.649864 | 1.413676 | 0.087329  | 0.892677  | 1.000      |
| 48 GOBP-POSITIVE.REGULATION.OF.IMMUNE.SYSTEM.PROCESS | GO-0002684    | 18   | 0.443000 | 1.412332 | 0.097561  | 0.881013  | 1.000      |
| 49 GOBP-RECEPTOR.INTERNALIZATION                     | GO-0031623    | 5    | 0.649864 | 1.411213 | 0.081037  | 0.868797  | 1.000      |
| 50 GOBP-NEGATIVE.REGULATION.OF.CELL.DEATH            | GO-0060548    | 22   | 0.420897 | 1.410717 | 0.081203  | 0.853872  | 1.000      |
| 51 GOBP-REGULATION.OF.FAT.CELL.DIFFERENTIATION       | GO-0045598    | 6    | 0.616379 | 1.408797 | 0.109299  | 0.847150  | 1.000      |
| 52 GOBP-REGULATION.OF.CELL.SIZE                      | GO-0008361    | 5    | 0.658172 | 1.405710 | 0.096186  | 0.845925  | 1.000      |
| 53 GOBP-RESPONSE.TO.CYTOKINE                         | GO-0034097    | 23   | 0.425425 | 1.399292 | 0.076487  | 0.860231  | 1.000      |
| 54 GOBP-REGULATION.OF.RECEPTOR.MEDIATED.ENDOCYTOSIS  | GO-0048259    | 5    | 0.654508 | 1.395425 | 0.086957  | 0.863283  | 1.000      |
| 55 GOBP-POSITIVE.REGULATION.OF.SMOOTH.MUSCLE.CELL... | GO-0048661    | 5    | 0.642403 | 1.392229 | 0.097403  | 0.858735  | 1.000      |
| 56 GOBP-REGULATION.OF.NEURON.PROJECTION.DEVELOPMENT  | GO-0010975    | 16   | 0.449841 | 1.391981 | 0.078635  | 0.849382  | 1.000      |
| 57 GOBP-NEGATIVE.REGULATION.OF.LOCOMOTION            | GO-0040013    | 5    | 0.651213 | 1.391131 | 0.098993  | 0.838860  | 1.000      |
| 58 GOBP-PROTEOLYSIS                                  | GO-0006508    | 17   | 0.451662 | 1.390741 | 0.082840  | 0.826433  | 1.000      |
| 59 GOBP-COGNITION                                    | GO-0050890    | 28   | 0.394444 | 1.384548 | 0.103499  | 0.839553  | 1.000      |
| 60 GOBP-ACTIVATION.OF.PROTEIN.KINASE.ACTIVITY        | GO-0032147    | 10   | 0.514590 | 1.383987 | 0.107023  | 0.828201  | 1.000      |
| 61 REACTOME.POST.TRANSLATIONAL.PROTEIN.MODIFICATION  | R-RNO-597592  | 7    | 0.580006 | 1.381619 | 0.095390  | 0.825779  | 1.000      |
| 62 GOBP-REGULATION.OF.ENDOCYTOSIS                    | GO-0002252    | 6    | 0.605406 | 1.379007 | 0.100993  | 0.824332  | 1.000      |
| 63 GOBP-REGULATION.OF.INFLAMMATORY.RESPONSE          | GO-0050727    | 7    | 0.575485 | 1.374290 | 0.115192  | 0.833324  | 1.000      |
| 64 GOBP-IMMUNE.EFFECTOR.PROCESS                      | GO-0002391    | 11   | 0.483391 | 1.374238 | 0.116208  | 0.820729  | 1.000      |
| 65 GOBP-MYELOID.LEUKOCYTE.ACTIVATION                 | GO-0002274    | 8    | 0.550409 | 1.369653 | 0.116613  | 0.827405  | 1.000      |
| 66 GOBP-REGULATION.OF.IMMUNE.RESPONSE                | GO-0050776    | 12   | 0.472895 | 1.367241 | 0.130094  | 0.824992  | 1.000      |
| 67 GOBP-LIPID.BIOSYNTHETIC.PROCESS                   | GO-0008610    | 6    | 0.594932 | 1.366774 | 0.125620  | 0.814742  | 1.000      |
| 68 GOBP-REGULATION.OF.DEFENSE.RESPONSE               | GO-0031347    | 7    | 0.575485 | 1.362293 | 0.118314  | 0.822737  | 1.000      |
| 69 GOBP-NEGATIVE.REGULATION.OF.NEURON.DEATH          | GO-1901215    | 11   | 0.487270 | 1.359693 | 0.110769  | 0.822197  | 1.000      |
| 70 GOBP-LIPID.METABOLIC.PROCESS                      | GO-0006629    | 10   | 0.503782 | 1.350586 | 0.131045  | 0.850484  | 1.000      |
| 71 GOBP-RESPONSE.TO.CADMIUM.ION                      | GO-0046686    | 6    | 0.587893 | 1.343796 | 0.113238  | 0.867106  | 1.000      |
| 72 GOBP-ACTIN.FILAMENT.BASED.PROCESS                 | GO-0030029    | 7    | 0.561922 | 1.341075 | 0.132787  | 0.866825  | 1.000      |
| 73 GOBP-POSITIVE.REGULATION.OF.ANION.TRANSPORT       | GO-1903793    | 9    | 0.501529 | 1.339773 | 0.150000  | 0.860802  | 1.000      |
| 74 GOBP-REGULATION.OF.CELLULAR.CATABOLIC.PROCESS     | GO-004031329  | 10   | 0.494057 | 1.334099 | 0.135350  | 0.873703  | 1.000      |
| 75 GOBP-REGULATION.OF.SMALL.MOLECULE.METABOLIC.PR... | GO-0062012    | 9    | 0.507014 | 1.333124 | 0.131833  | 0.866269  | 1.000      |
| 76 HALLMARK.ALLOGRAFT.REJECTION                      | M5950         | 7    | 0.555051 | 1.327995 | 0.122642  | 0.877645  | 1.000      |
| 77 GOBP-INOSITOL.LIPID.MEDIATED.SIGNALING            | GO-0048017    | 8    | 0.537108 | 1.325488 | 0.138315  | 0.876894  | 1.000      |
| 78 GOBP-REGULATION.OF.LIPID.BIOSYNTHETIC.PROCESS     | GO-0046890    | 6    | 0.594932 | 1.324216 | 0.141046  | 0.870868  | 1.000      |
| 79 GOBP-NEGATIVE.REGULATION.OF.SYNAPTIC.TRANSMISSION | GO-0050805    | 6    | 0.594143 | 1.323987 | 0.134021  | 0.860930  | 1.000      |
| 80 GOBP-NEGATIVE.REGULATION.OF.HYDROLASE.ACTIVITY    | GO-0051346    | 11   | 0.475929 | 1.323606 | 0.159875  | 0.852291  | 1.000      |
| 81 GOBP-NEUROINFLAMMATORY.RESPONSE                   | GO-0150076    | 5    | 0.613684 | 1.323420 | 0.134775  | 0.842669  | 1.000      |
| 82 GOBP-RESPONSE.TO.NICOTINE                         | GO-0035094    | 7    | 0.546881 | 1.322992 | 0.162205  | 0.834242  | 1.000      |
| 83 GOBP-EXTRINSIC.APOPTOTIC.SIGNALING.PATHWAY        | GO-0097191    | 7    | 0.544851 | 1.321975 | 0.159052  | 0.828229  | 1.000      |

Continuation of Table S8

| NAME                                                   | ID            | SIZE | ES       | NES      | NOM.p.val | FDR.q.val | FWER.p.val |
|--------------------------------------------------------|---------------|------|----------|----------|-----------|-----------|------------|
| 84 GOBP-REGULATION-OF-CYSTEINE-TYPE-ENDOPEPTIDASE...   | GO-2000116    | 9    | 0.500109 | 1.319724 | 0.141935  | 0.827449  | 1.000      |
| 85 GOBP-CELLULAR-RESPONSE-TO-INORGANIC-SUBSTANCE       | GO-0071241    | 11   | 0.473490 | 1.316081 | 0.143951  | 0.831694  | 1.000      |
| 86 GOBP-CELLULAR-AMIDE-METABOLIC-PROCESS               | GO-0043603    | 12   | 0.454528 | 1.313527 | 0.136508  | 0.832016  | 1.000      |
| 87 GOBP-RESPONSE-TO-ACID-CHEMICAL                      | GO-0001101    | 6    | 0.578391 | 1.309235 | 0.145614  | 0.839707  | 1.000      |
| 88 REACTOME-MEMBRANE-TRAFFICKING                       | R-RNO-199991  | 5    | 0.605869 | 1.305856 | 0.143836  | 0.843474  | 1.000      |
| 89 GOBP-NEGATIVE-REGULATION-OF-APOPTOTIC-SIGNALIN...   | GO-2001234    | 7    | 0.548127 | 1.303325 | 0.158706  | 0.844108  | 1.000      |
| 90 REACTOME-EXTRA-NUCLEAR-ESTROGEN-SIGNALING           | R-RNO-900939  | 7    | 0.538187 | 1.302169 | 0.155449  | 0.839367  | 1.000      |
| 91 GOBP-SMOOTH-MUSCLE-CELL-PROLIFERATION               | GO-0048659    | 6    | 0.568056 | 1.300100 | 0.150820  | 0.838406  | 1.000      |
| 92 GOBP-POSITIVE-REGULATION-OF-CYTOKINE-PRODUCTION     | GO-0001819    | 7    | 0.547419 | 1.299915 | 0.161840  | 0.830129  | 1.000      |
| 93 GOBP-REGULATION-OF-CELLULAR-COMPONENT-MOVEMENT      | GO-0051270    | 15   | 0.424757 | 1.296439 | 0.159574  | 0.833624  | 1.000      |
| 94 GOBP-MONOSACCHARIDE-METABOLIC-PROCESS               | GO-0005996    | 6    | 0.573451 | 1.295088 | 0.154093  | 0.830227  | 1.000      |
| 95 GOBP-GLUCOSE-METABOLIC-PROCESS                      | GO-0006006    | 6    | 0.573451 | 1.293002 | 0.170213  | 0.829205  | 1.000      |
| 96 GOBP-REGULATION-OF-HYDROLASE-ACTIVITY               | GO-0051336    | 22   | 0.380764 | 1.290903 | 0.157353  | 0.828274  | 1.000      |
| 97 GOBP-REGULATION-OF-PROTEIN-LOCALIZATION             | GO-0032880    | 18   | 0.409564 | 1.290876 | 0.152466  | 0.819921  | 1.000      |
| 98 GOBP-ASSOCIATIVE-LEARNING                           | GO-0008306    | 7    | 0.535321 | 1.290528 | 0.155116  | 0.812999  | 1.000      |
| 99 GOBP-NEURON-DEVELOPMENT                             | GO-0048666    | 34   | 0.357748 | 1.290232 | 0.147059  | 0.805755  | 1.000      |
| 100 GOBP-PERIPHERAL-NERVOUS-SYSTEM-DEVELOPMENT         | GO-0007422    | 9    | 0.493287 | 1.288591 | 0.166667  | 0.803450  | 1.000      |
| 101 GOBP-OSTEOBLAST-DIFFERENTIATION                    | GO-0001649    | 5    | 0.601396 | 1.285479 | 0.164076  | 0.806703  | 1.000      |
| 102 GOBP-NEGATIVE-REGULATION-OF-CATABOLIC-PROCESS      | GO-0009895    | 8    | 0.512299 | 1.284125 | 0.180952  | 0.804028  | 1.000      |
| 103 GOBP-NEGATIVE-REGULATION-OF-PROTEOLYSIS            | GO-0045861    | 8    | 0.516302 | 1.283868 | 0.177711  | 0.797241  | 1.000      |
| 104 GOBP-CELL-PROJECTION-ORGANIZATION                  | GO-0030030    | 35   | 0.352332 | 1.282446 | 0.147937  | 0.795125  | 1.000      |
| 105 GOBP-NEGATIVE-REGULATION-OF-CATALYTIC-ACTIVITY     | GO-0043086    | 17   | 0.413724 | 1.282438 | 0.171429  | 0.787633  | 1.000      |
| 106 GOBP-REGULATION-OF-LONG-TERM-SYNAPTIC-POTENTIAL... | GO-1900271    | 6    | 0.569506 | 1.280955 | 0.166392  | 0.785526  | 1.000      |
| 107 REACTOME-VESICLE-MEDIATED-TRANSPORT                | R-RNO-5653656 | 5    | 0.605869 | 1.277447 | 0.167513  | 0.790898  | 1.000      |
| 108 GOBP-PEPTIDE-METABOLIC-PROCESS                     | GO-0005118    | 11   | 0.462628 | 1.273735 | 0.188768  | 0.796637  | 1.000      |
| 109 GOBP-LEUKOCYTE-MEDIATED-IMMUNITY                   | GO-0002443    | 8    | 0.505884 | 1.272230 | 0.181970  | 0.794709  | 1.000      |
| 110 GOBP-POSITIVE-REGULATION-OF-CELL-GROWTH            | GO-0030307    | 6    | 0.575523 | 1.271877 | 0.168285  | 0.788739  | 1.000      |
| 111 GOBP-NEURON-DEATH                                  | GO-0070997    | 18   | 0.401328 | 1.269323 | 0.177465  | 0.790942  | 1.000      |
| 112 GOBP-APOPTOTIC-PROCESS                             | GO-0006915    | 35   | 0.350878 | 1.268243 | 0.188652  | 0.787606  | 1.000      |
| 113 GOBP-IMPORT-INTO-CELL                              | GO-0098657    | 6    | 0.543017 | 1.267392 | 0.188103  | 0.783394  | 1.000      |
| 114 GOBP-POSITIVE-REGULATION-OF-GENE-EXPRESSION        | GO-0010628    | 16   | 0.403644 | 1.254086 | 0.195455  | 0.822239  | 1.000      |
| 115 GOBP-PROTEIN-LOCALIZATION-TO-MEMBRANE              | GO-0072657    | 13   | 0.433387 | 1.250538 | 0.201210  | 0.827483  | 1.000      |
| 116 GOBP-REGULATION-OF-PEPTIDE-HORMONE-SECRETION       | GO-0090276    | 6    | 0.551877 | 1.250516 | 0.205255  | 0.820483  | 1.000      |
| 117 GOBP-LEUKOCYTE-MIGRATION                           | GO-0050900    | 6    | 0.548798 | 1.250033 | 0.212418  | 0.815028  | 1.000      |
| 118 GOBP-ENDOCYTOSIS                                   | GO-0008597    | 8    | 0.502853 | 1.245864 | 0.206785  | 0.822112  | 1.000      |
| 119 REACTOME-EPH-EPHRIN-SIGNALING                      | R-RNO-268233  | 6    | 0.539735 | 1.244645 | 0.217600  | 0.819516  | 1.000      |
| 120 GOBP-REGULATION-OF-PEPTIDE-SECRETION               | GO-0002791    | 7    | 0.516817 | 1.244606 | 0.214286  | 0.812935  | 1.000      |
| 121 GOBP-MULTICELLULAR-ORGANISMAL-HOMEOSTASIS          | GO-0048871    | 12   | 0.441585 | 1.239758 | 0.231884  | 0.822510  | 1.000      |
| 122 GOBP-POSITIVE-REGULATION-OF-IMMUNE-RESPONSE        | GO-0050778    | 9    | 0.471559 | 1.238038 | 0.221865  | 0.821737  | 1.000      |
| 123 GOBP-REGULATION-OF-HORMONE-LEVELS                  | GO-0010817    | 12   | 0.431505 | 1.233018 | 0.191063  | 0.832008  | 1.000      |
| 124 REACTOME-INNATE-IMMUNE-SYSTEM                      | R-RNO-168249  | 16   | 0.400564 | 1.232559 | 0.216301  | 0.826874  | 1.000      |
| 125 GOBP-CELLULAR-LIPID-METABOLIC-PROCESS              | GO-0044255    | 7    | 0.519120 | 1.229210 | 0.226984  | 0.853554  | 1.000      |
| 126 GOBP-REGULATION-OF-PROTEOLYSIS                     | GO-0030162    | 12   | 0.425739 | 1.220094 | 0.227964  | 0.856463  | 1.000      |

Continuation of Table S8

| NAME                                                  | ID            | SIZE | ES       | NES      | NOM.p.val | FDR.q.val | FWER.p.val |
|-------------------------------------------------------|---------------|------|----------|----------|-----------|-----------|------------|
| 127 GOBP_NERVOUS_SYSTEM_PROCESS                       | GO-0050877    | 38   | 0.336614 | 1.218500 | 0.218182  | 0.854986  | 1.000      |
| 128 GOBP_POSITIVE_REGULATION_OF_PHOSPHATIDYLINOSIT... | GO-0014068    | 5    | 0.568305 | 1.212722 | 0.227273  | 0.852496  | 1.000      |
| 129 REACTOME_SIGNALING_BY_NUCLEAR_RECEPTORS           | R-RNO-9006931 | 8    | 0.481005 | 1.216913 | 0.231013  | 0.847074  | 1.000      |
| 130 GOBP_INSULIN_SECRETION                            | GO-0030073    | 7    | 0.510769 | 1.214703 | 0.223114  | 0.847977  | 1.000      |
| 131 GOBP_NEUROTROPIN_TK_R_RECEPTOR_SIGNALING_PATHWAY  | GO-0048011    | 6    | 0.525482 | 1.214255 | 0.235489  | 0.843004  | 1.000      |
| 132 GOBP_REGULATION_OF_ANATOMICAL_STRUCTURE_SIZE      | GO-0090066    | 10   | 0.462544 | 1.213797 | 0.232484  | 0.838243  | 1.000      |
| 133 GOBP_TEMPERATURE_HOMEOSTASIS                      | GO-0001659    | 5    | 0.555846 | 1.212463 | 0.233449  | 0.836545  | 1.000      |
| 134 GOBP_PROTEIN_LOCALIZATION_TO_PLASMA_MEMBRANE      | GO-0072659    | 7    | 0.516984 | 1.211528 | 0.240196  | 0.833571  | 1.000      |
| 135 GOBP_REGULATION_OF_CARBOHYDRATE_BIOSYNTHETIC_P... | GO-0043255    | 5    | 0.563349 | 1.211510 | 0.233058  | 0.827503  | 1.000      |
| 136 GOBP_POSTSYNAPSE_ORGANIZATION                     | GO-0099173    | 10   | 0.459944 | 1.207936 | 0.230769  | 0.833425  | 1.000      |
| 137 GOBP_BEHAVIOR                                     | GO-0007610    | 33   | 0.339927 | 1.206907 | 0.218571  | 0.830557  | 1.000      |
| 138 REACTOME_ESR_MEDIATED_SIGNALING                   | R-RNO-8939211 | 8    | 0.481005 | 1.206899 | 0.243200  | 0.824612  | 1.000      |
| 139 GOBP_POSITIVE_REGULATION_OF_LOCOMOTION            | GO-0040017    | 11   | 0.434396 | 1.203674 | 0.234548  | 0.829002  | 1.000      |
| 140 GOBP_POSITIVE_REGULATION_OF_DEFENSE_RESPONSE      | GO-0031349    | 5    | 0.562919 | 1.203225 | 0.243478  | 0.824646  | 1.000      |
| 141 GOBP_PEPTIDE_HORMONE_SECRETION                    | GO-0030072    | 7    | 0.510769 | 1.202905 | 0.256536  | 0.819926  | 1.000      |
| 142 GOBP_CARBOHYDRATE_BIOSYNTHETIC_PROCESS            | GO-0016051    | 5    | 0.563349 | 1.202668 | 0.250853  | 0.815154  | 1.000      |
| 143 GOBP_REGULATION_OF_CATABOLIC_PROCESS              | GO-0009894    | 13   | 0.417235 | 1.201575 | 0.240061  | 0.812810  | 1.000      |
| 144 GOBP_REGULATION_OF_CARBOHYDRATE_METABOLIC_PROCESS | GO-0006109    | 5    | 0.563349 | 1.199063 | 0.250000  | 0.814924  | 1.000      |
| 145 GOBP_CELLULAR_CARBOHYDRATE_METABOLIC_PROCESS      | GO-0044262    | 5    | 0.545059 | 1.199572 | 0.245409  | 0.817851  | 1.000      |
| 146 GOBP_REGULATION_OF_CELL_PROJECTION_ORGANIZATION   | GO-0031344    | 20   | 0.366652 | 1.194146 | 0.227273  | 0.820042  | 1.000      |
| 147 GOBP_REPRODUCTION                                 | GO-0000003    | 18   | 0.373537 | 1.189810 | 0.243370  | 0.828380  | 1.000      |
| 148 GOBP_ENZYME_LINKED_RECEPTOR_PROTEIN_SIGNALING.... | GO-0007167    | 24   | 0.351248 | 1.189558 | 0.248547  | 0.823564  | 1.000      |
| 149 HALLMARK_P13K_AKT_MTOR_SIGNALING                  | M5923         | 6    | 0.519843 | 1.185509 | 0.257240  | 0.830398  | 1.000      |
| 150 GOBP_NEUROTROPIN_SIGNALING_PATHWAY                | GO-0038179    | 6    | 0.525482 | 1.183780 | 0.264559  | 0.830417  | 1.000      |
| 151 GOBP_NEURON_DIFFERENTIATION                       | GO-0030182    | 37   | 0.322061 | 1.182687 | 0.254446  | 0.828345  | 1.000      |
| 152 GOBP_REGULATION_OF_PROTEIN_SERINE_THREONINE_KI... | GO-0071900    | 12   | 0.413839 | 1.175638 | 0.253414  | 0.845425  | 1.000      |
| 153 GOBP_CELL_ACTIVATION                              | GO-0001775    | 22   | 0.354860 | 1.173056 | 0.265537  | 0.847939  | 1.000      |
| 154 GOBP_REGULATION_OF_PEPTIDE_TRANSPORT              | GO-0090087    | 10   | 0.447898 | 1.168514 | 0.274845  | 0.856496  | 1.000      |
| 155 GOBP_EXOCYTOSIS                                   | GO-0006887    | 11   | 0.415843 | 1.167485 | 0.268817  | 0.854262  | 1.000      |
| 156 GOBP_NEUROGENESIS                                 | GO-0022008    | 41   | 0.318144 | 1.165592 | 0.255072  | 0.854924  | 1.000      |
| 157 GOBP_REGULATION_OF_HORMONE_SECRETION              | GO-0046883    | 8    | 0.449184 | 1.162006 | 0.283388  | 0.860624  | 1.000      |
| 158 GOBP_OSSIFICATION                                 | GO-0001503    | 9    | 0.441324 | 1.160569 | 0.250814  | 0.859754  | 1.000      |
| 159 GOBP_REGULATION_OF_POSTSYNAPSE_ORGANIZATION       | GO-0099175    | 6    | 0.503139 | 1.160194 | 0.274062  | 0.855621  | 1.000      |
| 160 GOBP_POLYSACCHARIDE_METABOLIC_PROCESS             | GO-0005976    | 5    | 0.545024 | 1.157751 | 0.294218  | 0.863447  | 1.000      |
| 161 GOBP_RESPONSE_TO_NUTRIENT                         | GO-0007584    | 5    | 0.542169 | 1.154661 | 0.285240  | 0.858999  | 1.000      |
| 162 GOBP_AMYLOID_PRECURSOR_PROTEIN_CATABOLIC_PROCESS  | GO-0042987    | 5    | 0.533908 | 1.152009 | 0.284192  | 0.864240  | 1.000      |
| 163 GOBP_CARBOHYDRATE_DERIVATIVE_METABOLIC_PROCESS    | GO-1901135    | 8    | 0.468011 | 1.151732 | 0.296296  | 0.859863  | 1.000      |
| 164 GOBP_POSITIVE_REGULATION_OF_GLIOGENESIS           | GO-0014015    | 5    | 0.542169 | 1.151447 | 0.298658  | 0.855512  | 1.000      |
| 165 GOBP_AMYLOID_PRECURSOR_PROTEIN_METABOLIC_PROCESS  | GO-0042982    | 5    | 0.533908 | 1.150729 | 0.270548  | 0.852576  | 1.000      |
| 166 GOBP_REGULATION_OF_GLIOGENESIS                    | GO-0014013    | 5    | 0.542169 | 1.150039 | 0.312715  | 0.849707  | 1.000      |
| 167 GOBP_REGULATION_OF_IMMUNE_SYSTEM_PROCESS          | GO-0002682    | 21   | 0.351613 | 1.146644 | 0.282318  | 0.855021  | 1.000      |
| 168 GOBP_POSITIVE_REGULATION_OF_SIGNALING             | GO-0023056    | 34   | 0.317185 | 1.146341 | 0.281337  | 0.850756  | 1.000      |
| 169 GOBP_POSITIVE_REGULATION_OF_LIPASE_ACTIVITY       | GO-0060193    | 5    | 0.526189 | 1.145270 | 0.316781  | 0.848899  | 1.000      |



Continuation of Table S8

| NAME | ID                                                | SIZE          | ES | NES      | NOM.p.val | FDR.q.val | FWER.p.val |
|------|---------------------------------------------------|---------------|----|----------|-----------|-----------|------------|
| 170  | REACTOME-EXTRACELLULAR_MATRIX_ORGANIZATION        | R-RNO-1474244 | 5  | 0.532405 | 1.144847  | 0.302521  | 0.845091   |
| 171  | GOBP-REGULATION_OF_RESPONSE_TO_STRESS             | GO-0080134    | 19 | 0.360851 | 1.144728  | 0.291176  | 0.840556   |
| 172  | GOBP-REGULATION_OF_PROTEIN_PHOSPHORYLATION        | GO-0001932    | 25 | 0.339528 | 1.143798  | 0.285916  | 0.838443   |
| 173  | GOBP-AMYLOID_BETA_METABOLIC_PROCESS               | GO-0050435    | 5  | 0.533908 | 1.142297  | 0.336752  | 0.837789   |
| 174  | REACTOME-ESTROGEN_DEPENDENT_NUCLEAR_EVENTS_DOW... | R-RNO-963463  | 5  | 0.523405 | 1.141606  | 0.305419  | 0.835188   |
| 175  | GOBP-DENDRITE_MORPHOGENESIS                       | GO-0048813    | 7  | 0.470710 | 1.138868  | 0.306818  | 0.838435   |
| 176  | REACTOME-SIGNALING_BY_NTRKS                       | R-RNO-166520  | 18 | 0.361961 | 1.136217  | 0.301994  | 0.841481   |
| 177  | GOBP-NEGATIVE_REGULATION_OF_PROTEIN_METABOLIC...  | GO-00051248   | 20 | 0.350078 | 1.134564  | 0.277698  | 0.841576   |
| 178  | GOBP-CELLULAR_RESPONSE_TO_CADMIUM_ION             | GO-0071276    | 5  | 0.515219 | 1.121235  | 0.345455  | 0.875689   |
| 179  | REACTOME-INFECTIOUS_DISEASE                       | R-HSA-5663205 | 12 | 0.393573 | 1.121057  | 0.315866  | 0.871352   |
| 180  | GOBP-REGULATION_OF_PHOSPHOLIPASE_C_ACTIVITY       | GO-1900274    | 5  | 0.526189 | 1.116917  | 0.310051  | 0.878947   |
| 181  | GOBP-NEGATIVE_REGULATION_OF_NEURON_APOPTOTIC_P... | GO-0043524    | 8  | 0.444330 | 1.116724  | 0.333858  | 0.874710   |
| 182  | GOBP-CELL_MIGRATION                               | GO-0016477    | 22 | 0.333901 | 1.116014  | 0.303907  | 0.872159   |
| 183  | GOBP-REGULATION_OF_EPITHELIAL_CELL_MIGRATION      | GO-0010632    | 6  | 0.490485 | 1.111603  | 0.344123  | 0.879744   |
| 184  | GOBP-MACROMOLECULE_CATABOLIC_PROCESS              | GO-0009057    | 11 | 0.402012 | 1.109869  | 0.329835  | 0.879885   |
| 185  | GOBP-CELL-CELL_JUNCTION_ORGANIZATION              | GO-0045216    | 6  | 0.474992 | 1.108840  | 0.323680  | 0.878046   |
| 186  | GOBP-POSITIVE_REGULATION_OF_CELLULAR_COMPONENT... | GO-0051130    | 24 | 0.328648 | 1.106696  | 0.327917  | 0.879389   |
| 187  | GOBP-POSITIVE_REGULATION_OF_HYDROLASE_ACTIVITY    | GO-0051345    | 16 | 0.364860 | 1.105460  | 0.317337  | 0.878308   |
| 188  | GOBP-MONOCARBOXYLIC_ACID_METABOLIC_PROCESS        | GO-0032787    | 6  | 0.494763 | 1.103949  | 0.349206  | 0.878078   |
| 189  | GOBP-PROTEIN_KINASE_B_SIGNALING                   | GO-0043491    | 6  | 0.493972 | 1.103517  | 0.345719  | 0.874603   |
| 190  | GOBP-NEGATIVE_REGULATION_OF_IMMUNE_SYSTEM_PROCESS | GO-0002683    | 5  | 0.507782 | 1.098553  | 0.341924  | 0.883987   |
| 191  | GOBP-REGULATION_OF_PHOSPHORUS_METABOLIC_PROCESS   | GO-0051174    | 26 | 0.321877 | 1.096215  | 0.328909  | 0.885936   |
| 192  | GOBP-MEMBRANE_PROTEIN_PROTEOLYSIS                 | GO-0033619    | 6  | 0.479020 | 1.095820  | 0.352554  | 0.882529   |
| 193  | GOBP-NEGATIVE_REGULATION_OF_ION_TRANSPORT         | GO-0043271    | 11 | 0.403598 | 1.094968  | 0.345313  | 0.880552   |
| 194  | GOBP-REGULATION_OF_CELLULAR_PROTEIN_LOCALIZATION  | GO-1903827    | 12 | 0.376889 | 1.092240  | 0.349544  | 0.880917   |
| 195  | GOBP-EPHRIIN_RECEPTOR_SIGNALING_PATHWAY           | GO-0048013    | 5  | 0.510420 | 1.083570  | 0.377104  | 0.903329   |
| 196  | GOBP-REGULATION_OF_CELL_DIFFERENTIATION           | GO-0045595    | 36 | 0.302323 | 1.083207  | 0.347280  | 0.899732   |
| 197  | GOBP-POSITIVE_REGULATION_OF_GROWTH                | GO-0045927    | 9  | 0.418443 | 1.081892  | 0.376361  | 0.898933   |
| 198  | GOBP-GENERATION_OF_PRECURSOR_METABOLITES_AND_E... | GO-0006091    | 5  | 0.506024 | 1.080559  | 0.386288  | 0.898319   |
| 199  | GOBP-HORMONE_TRANSPORT                            | GO-0009914    | 9  | 0.423765 | 1.080050  | 0.371069  | 0.895341   |
| 200  | GOBP-BIOLOGICAL_PROCESS_INVOLVED_IN_SYMBIOTIC...  | GO-004440     | 10 | 0.404774 | 1.079636  | 0.341158  | 0.892087   |
| 201  | GOBP-GLIOGENESIS                                  | GO-0042063    | 12 | 0.379652 | 1.079543  | 0.368421  | 0.887909   |
| 202  | GOBP-PROTEIN_PHOSPHORYLATION                      | GO-0006468    | 33 | 0.301978 | 1.077395  | 0.356742  | 0.889349   |
| 203  | REACTOME-TRANSCRIPTIONAL_REGULATION_OF_WHITE_A... | R-RNO-381340  | 6  | 0.461663 | 1.069953  | 0.381877  | 0.905279   |
| 204  | GOBP-POSITIVE_REGULATION_OF_ION_TRANSPORT         | GO-0043270    | 17 | 0.346564 | 1.069327  | 0.379971  | 0.902581   |
| 205  | GOBP-RESPONSE_TO_KETONE                           | GO-1901654    | 7  | 0.451195 | 1.068408  | 0.400000  | 0.900624   |
| 206  | GOBP-APOPTOTIC_MITOCHONDRIAL_CHANGES              | GO-0008637    | 6  | 0.473220 | 1.068247  | 0.382450  | 0.896725   |
| 207  | GOBP-SECRETION                                    | GO-0046903    | 24 | 0.318104 | 1.068228  | 0.361357  | 0.892465   |
| 208  | GOBP-REGULATION_OF_TRANSFERASE_ACTIVITY           | GO-0051338    | 21 | 0.322161 | 1.067402  | 0.365889  | 0.890366   |
| 209  | GOBP-POSITIVE_REGULATION_OF_PROTEIN_MODIFICATI... | GO-0031401    | 22 | 0.320552 | 1.066035  | 0.359882  | 0.889894   |
| 210  | GOBP-REGULATION_OF_PROTEIN_KINASE_ACTIVITY        | GO-0045859    | 21 | 0.322161 | 1.064887  | 0.365926  | 0.888855   |
| 211  | GOBP-REGULATION_OF_LIPASE_ACTIVITY                | GO-0060191    | 6  | 0.456443 | 1.064859  | 0.390203  | 0.884750   |
| 212  | GOBP-RESPONSE_TO_NITROGEN_COMPOUND                | GO-1901698    | 35 | 0.298471 | 1.064434  | 0.380818  | 0.881945   |

Continuation of Table S8

| NAME | ID                                                | SIZE | ES       | NES      | NOM.p.val | FDR.q.val | FWER.p.val |
|------|---------------------------------------------------|------|----------|----------|-----------|-----------|------------|
| 213  | REACTOME-TRANSCRIPTIONAL-REGULATION-BY_TP53       | 6    | 0.466900 | 1.063381 | 0.382504  | 0.880746  | 1.000      |
| 214  | GOBP-PHOSPHATIDYLINOSITOL-3-KINASE-SIGNALING      | 7    | 0.445684 | 1.062397 | 0.396899  | 0.879243  | 1.000      |
| 215  | GOBP-REGULATION-OF-VESICLE-MEDIATED-TRANSPORT     | 12   | 0.376180 | 1.061960 | 0.378336  | 0.876380  | 1.000      |
| 216  | GOBP-CYTOSKELETON-ORGANIZATION                    | 11   | 0.385993 | 1.058714 | 0.411498  | 0.881072  | 1.000      |
| 217  | GOBP-CARBOHYDRATE-METABOLIC-PROCESS               | 9    | 0.409679 | 1.056483 | 0.404651  | 0.883010  | 1.000      |
| 218  | GOBP-POSITIVE-REGULATION-OF-PROTEIN-PHOSPHORYL... | 22   | 0.320552 | 1.054661 | 0.388809  | 0.883679  | 1.000      |
| 219  | REACTOME-DEVELOPMENTAL-BIOLOGY                    | 22   | 0.317886 | 1.054310 | 0.392012  | 0.880618  | 1.000      |
| 220  | GOBP-REGULATION-OF-APOPTOTIC-SIGNALING-PATHWAY    | 10   | 0.382745 | 1.054163 | 0.389058  | 0.877053  | 1.000      |
| 221  | GOBP-REGULATION-OF-PROTEIN-CATABOLIC-PROCESS      | 7    | 0.435116 | 1.053069 | 0.403846  | 0.876063  | 1.000      |
| 222  | GOBP-CELLULAR-RESPONSE-TO-REACTIVE-OXYGEN-SPECIES | 7    | 0.431659 | 1.052146 | 0.397351  | 0.874440  | 1.000      |
| 223  | GOBP-POSITIVE-REGULATION-OF-PROTEOLYSIS           | 8    | 0.418493 | 1.050079 | 0.413183  | 0.875796  | 1.000      |
| 224  | GOBP-ANATOMICAL-STRUCTURE-HOMEOSTASIS             | 7    | 0.438851 | 1.049167 | 0.399676  | 0.874237  | 1.000      |
| 225  | GOBP-LOCOMOTION                                   | 31   | 0.298223 | 1.048894 | 0.397759  | 0.871042  | 1.000      |
| 226  | GOBP-REGULATION-OF-PHOSPHOLIPASE-ACTIVITY         | 6    | 0.456443 | 1.048768 | 0.403330  | 0.867570  | 1.000      |
| 227  | GOBP-MULTI-ORGANISM-PROCESS                       | 16   | 0.346697 | 1.048652 | 0.400000  | 0.864015  | 1.000      |
| 228  | GOBP-CELLULAR-RESPONSE-TO-CHEMICAL-STRESS         | 7    | 0.403946 | 1.048611 | 0.410774  | 0.860330  | 1.000      |
| 229  | GOBP-REGULATION-OF-MYELOID-CELL-DIFFERENTIATION   | 9    | 0.403946 | 1.044423 | 0.401626  | 0.867293  | 1.000      |
| 230  | GOBP-RESPONSE-TO-BACTERIUM                        | 13   | 0.358196 | 1.033900 | 0.424427  | 0.890035  | 1.000      |
| 231  | GOBP-REGULATION-OF-EXTRINSIC-APOPTOTIC-SIGNAL...  | 6    | 0.456893 | 1.031639 | 0.430213  | 0.891901  | 1.000      |
| 232  | GOBP-TRANSMEMBRANE-RECEPTOR-PROTEIN-TYROSINE-K... | 19   | 0.329555 | 1.028616 | 0.410795  | 0.895648  | 1.000      |
| 233  | GOBP-PATTERN-SPECIFICATION-PROCESS                | 6    | 0.455501 | 1.028594 | 0.448445  | 0.891878  | 1.000      |
| 234  | GOBP-PEPTIDE-SECRETION                            | 9    | 0.399662 | 1.026116 | 0.429245  | 0.893993  | 1.000      |
| 235  | GOBP-POSITIVE-REGULATION-OF-RESPONSE-TO-EXTERN... | 9    | 0.400569 | 1.025470 | 0.436066  | 0.891625  | 1.000      |
| 236  | GOBP-POSITIVE-REGULATION-OF-PROTEIN-SERINE-THR... | 9    | 0.400686 | 1.024748 | 0.429936  | 0.889623  | 1.000      |
| 237  | GOBP-TISSUE-HOMEOSTASIS                           | 5    | 0.476300 | 1.021003 | 0.440735  | 0.895468  | 1.000      |
| 238  | GOBP-REGULATION-OF-RESPONSE-TO-EXTERNAL-STIMULUS  | 15   | 0.338700 | 1.018327 | 0.440184  | 0.898385  | 1.000      |
| 239  | GOBP-PROTEIN-TETRAMERIZATION                      | 5    | 0.471601 | 1.017458 | 0.447712  | 0.896749  | 1.000      |
| 240  | GOBP-PEPTIDYL-SERINE-MODIFICATION                 | 12   | 0.358200 | 1.017098 | 0.436275  | 0.893858  | 1.000      |
| 241  | GOBP-RESPONSE-TO-ABIOTIC-STIMULUS                 | 27   | 0.290781 | 1.015575 | 0.452113  | 0.893915  | 1.000      |
| 242  | GOBP-REGIONALIZATION                              | 6    | 0.455501 | 1.013335 | 0.436306  | 0.898193  | 1.000      |
| 243  | GOBP-POSITIVE-REGULATION-OF-PHOSPHORUS-METABOL... | 23   | 0.305238 | 1.012302 | 0.446715  | 0.894581  | 1.000      |
| 244  | GOBP-REGULATION-OF-VASCULAR-ASSOCIATED-SMOOTH...  | 5    | 0.473268 | 1.011766 | 0.474295  | 0.892266  | 1.000      |
| 245  | GOBP-MYELOID-CELL-DIFFERENTIATION                 | 13   | 0.355072 | 1.010661 | 0.436137  | 0.891178  | 1.000      |
| 246  | GOBP-REGULATION-OF-ORGANELLE-ORGANIZATION         | 14   | 0.335259 | 1.010028 | 0.450663  | 0.889081  | 1.000      |
| 247  | GOBP-RESPONSE-TO-MOLECULE-OF-BACTERIAL-ORIGIN     | 13   | 0.358196 | 1.008369 | 0.447368  | 0.889595  | 1.000      |
| 248  | GOBP-PROTEIN-LOCALIZATION-TO-CELL-PERIPHERY       | 12   | 0.359051 | 1.007281 | 0.469630  | 0.888670  | 1.000      |
| 249  | REACTOME-CIRCADIAN-CLOCK                          | 5    | 0.475206 | 1.006488 | 0.479542  | 0.887025  | 1.000      |
| 250  | GOBP-PROTEIN-CATABOLIC-PROCESS                    | 8    | 0.402744 | 1.004216 | 0.460925  | 0.888738  | 1.000      |
| 251  | GOBP-POSITIVE-REGULATION-OF-SYNAPTIC-TRANSMISSION | 15   | 0.328667 | 0.998818 | 0.451219  | 0.897765  | 1.000      |
| 252  | GOBP-POSITIVE-REGULATION-OF-MYELOID-LEUKOCYTE...  | 6    | 0.440364 | 0.997449 | 0.475712  | 0.897611  | 1.000      |
| 253  | GOBP-CELLULAR-COMPONENT-MORPHOGENESIS             | 25   | 0.288621 | 0.996591 | 0.459538  | 0.896152  | 1.000      |
| 254  | GOBP-NEGATIVE-REGULATION-OF-INTRACELLULAR-SIGN... | 7    | 0.422870 | 0.991085 | 0.483037  | 0.905509  | 1.000      |
| 255  | GOBP-GLAND-DEVELOPMENT                            | 7    | 0.414551 | 0.988624 | 0.472222  | 0.907925  | 1.000      |

Continuation of Table S8

| NAME                                                  | ID            | SIZE | ES       | NES      | NOM.p.val | FDR.q.val | FWER.p.val |
|-------------------------------------------------------|---------------|------|----------|----------|-----------|-----------|------------|
| 256 GOBP-REGULATION-OF-CELLULAR-LOCALIZATION          | GO-0060341    | 17   | 0.310803 | 0.98251  | 0.457778  | 0.905324  | 1.000      |
| 257 GOBP-CELL-PART-MORPHOGENESIS                      | GO-0032990    | 25   | 0.288621 | 0.98560  | 0.480905  | 0.905831  | 1.000      |
| 258 GOBP-RESPONSE-TO-MECHANICAL-STIMULUS              | GO-0009612    | 6    | 0.432266 | 0.985964 | 0.472178  | 0.903748  | 1.000      |
| 259 GOBP-APOPTOTIC-SIGNALING-PATHWAY                  | GO-0097190    | 15   | 0.325573 | 0.984426 | 0.491499  | 0.904095  | 1.000      |
| 260 GOBP-RESPONSE-TO-GROWTH-FACTOR                    | GO-0070488    | 18   | 0.312488 | 0.984261 | 0.476401  | 0.901109  | 1.000      |
| 261 GOBP-REGULATION-OF-ANION-TRANSPORT                | GO-0040700    | 20   | 0.301751 | 0.983709 | 0.486291  | 0.898826  | 1.000      |
| 262 GOBP-REGULATION-OF-CELL-CYCLE-PROCESS             | GO-0010564    | 5    | 0.461303 | 0.980566 | 0.507563  | 0.902841  | 1.000      |
| 263 GOBP-PROTEIN-PHOSPHORYLATION                      | GO-0006470    | 7    | 0.412974 | 0.979473 | 0.485981  | 0.901979  | 1.000      |
| 264 GOBP-DENDRITIC-SPINE-MORPHOGENESIS                | GO-0060997    | 5    | 0.468992 | 0.976442 | 0.517065  | 0.905765  | 1.000      |
| 265 GOBP-NEGATIVE-REGULATION-OF-SIGNALING             | GO-0002307    | 21   | 0.303422 | 0.975465 | 0.494186  | 0.904661  | 1.000      |
| 266 GOBP-POSITIVE-REGULATION-OF-LONG-TERM-SYNAPTIC... | GO-1900273    | 5    | 0.457866 | 0.975078 | 0.497400  | 0.902203  | 1.000      |
| 267 GOBP-CELL-MORPHOGENESIS                           | GO-0000902    | 25   | 0.288621 | 0.974976 | 0.503526  | 0.899055  | 1.000      |
| 268 GOBP-SMALL-MOLECULE-METABOLIC-PROCESS             | GO-0044281    | 16   | 0.313622 | 0.973041 | 0.495495  | 0.900077  | 1.000      |
| 269 GOBP-MYELOID-LEUKOCYTE-DIFFERENTIATION            | GO-0002573    | 11   | 0.346629 | 0.971778 | 0.507200  | 0.899526  | 1.000      |
| 270 GOBP-PHOSPHORYLATION                              | GO-0016311    | 7    | 0.412974 | 0.96836  | 0.521382  | 0.907452  | 1.000      |
| 271 GOBP-REGULATION-OF-NERVOUS-SYSTEM-DEVELOPMENT     | GO-0051960    | 15   | 0.443648 | 0.964708 | 0.500000  | 0.904624  | 1.000      |
| 272 GOBP-REGULATION-OF-WNT-SIGNALING-PATHWAY          | GO-0030111    | 5    | 0.372610 | 0.964204 | 0.510101  | 0.905655  | 1.000      |
| 273 GOBP-FAT-CELL-DIFFERENTIATION                     | GO-0045444    | 9    | 0.372610 | 0.964204 | 0.511774  | 0.903354  | 1.000      |
| 274 GOBP-MEMBRANE-ORGANIZATION                        | GO-0061024    | 12   | 0.329276 | 0.961667 | 0.521875  | 0.905806  | 1.000      |
| 275 GOBP-CARBOHYDRATE-HOMEOSTASIS                     | GO-0003350    | 7    | 0.397142 | 0.959953 | 0.491311  | 0.906341  | 1.000      |
| 276 GOBP-CELL-POPULATION-PROLIFERATION                | GO-0008283    | 32   | 0.266205 | 0.959076 | 0.506456  | 0.904994  | 1.000      |
| 277 GOBP-RESPONSE-TO-ENDOGENOUS-STIMULUS              | GO-0009719    | 34   | 0.263566 | 0.958047 | 0.513699  | 0.903952  | 1.000      |
| 278 GOBP-CELL-ACTIVATION-INVOLVED-IN-IMMUNE-RESPONSE  | GO-0002263    | 6    | 0.414807 | 0.953358 | 0.520525  | 0.911605  | 1.000      |
| 279 GOBP-ESTABLISHMENT-OF-PROTEIN-LOCALIZATION-TO-... | GO-0072594    | 5    | 0.443663 | 0.951015 | 0.545455  | 0.913773  | 1.000      |
| 280 GOBP-RESPIRATORY-SYSTEM-DEVELOPMENT               | GO-0060541    | 6    | 0.420268 | 0.950815 | 0.524181  | 0.910889  | 1.000      |
| 281 GOBP-SKELETAL-MUSCLE-ORGAN-DEVELOPMENT            | GO-0060538    | 5    | 0.443771 | 0.950749 | 0.559567  | 0.907798  | 1.000      |
| 282 GOBP-DENDRITE-DEVELOPMENT                         | GO-0016358    | 10   | 0.359931 | 0.950358 | 0.545171  | 0.905315  | 1.000      |
| 283 GOBP-NEURON-PROJECTION-ORGANIZATION               | GO-0106027    | 8    | 0.381665 | 0.950020 | 0.536667  | 0.902844  | 1.000      |
| 284 GOBP-RESPONSE-TO-OXIDATIVE-STRESS                 | GO-0006979    | 8    | 0.369099 | 0.949218 | 0.524721  | 0.901545  | 1.000      |
| 285 GOBP-REGULATION-OF-PROTEIN-MODIFICATION-PROCESS   | GO-0031399    | 28   | 0.275739 | 0.948441 | 0.517493  | 0.900070  | 1.000      |
| 286 GOBP-POSITIVE-REGULATION-OF-PROTEIN-KINASE-ACT... | GO-0045860    | 18   | 0.299996 | 0.947939 | 0.509119  | 0.897908  | 1.000      |
| 287 GOBP-RESPONSE-TO-TUMOR-NECROSIS-FACTOR            | GO-0034612    | 7    | 0.390819 | 0.947186 | 0.536050  | 0.896383  | 1.000      |
| 288 GOBP-GLIAL-CELL-DIFFERENTIATION                   | GO-0010001    | 10   | 0.348164 | 0.942545 | 0.534056  | 0.903336  | 1.000      |
| 289 REACTOME-NGF-STIMULATED-TRANSCRIPTION             | R-RNO-9031628 | 9    | 0.353930 | 0.942122 | 0.521880  | 0.901241  | 1.000      |
| 290 GOBP-REGULATION-OF-CELLULAR-RESPONSE-TO-STRESS    | GO-0080135    | 9    | 0.359889 | 0.941958 | 0.545455  | 0.898481  | 1.000      |
| 291 GOBP-MYELOID-LEUKOCYTE-MEDIATED-IMMUNITY          | GO-0002444    | 6    | 0.414807 | 0.941251 | 0.546798  | 0.896902  | 1.000      |
| 292 GOBP-POSITIVE-REGULATION-OF-DEVELOPMENTAL-GROWTH  | GO-0048639    | 8    | 0.381139 | 0.939303 | 0.546178  | 0.898086  | 1.000      |
| 293 GOBP-RESPONSE-TO-CALCIUM-ION                      | GO-0051592    | 6    | 0.412974 | 0.937279 | 0.543253  | 0.899311  | 1.000      |
| 294 GOBP-DEVELOPMENTAL-CELL-GROWTH                    | GO-0048588    | 5    | 0.430309 | 0.935343 | 0.539823  | 0.900355  | 1.000      |
| 295 GOBP-MALE-GAMETE-GENERATION                       | GO-0048232    | 5    | 0.428139 | 0.933271 | 0.545453  | 0.901903  | 1.000      |
| 296 GOBP-RESPONSE-TO-ALCOHOL                          | GO-0097305    | 11   | 0.342062 | 0.931378 | 0.552335  | 0.902965  | 1.000      |
| 297 GOBP-AMIDE-BIOSYNTHETIC-PROCESS                   | GO-0043604    | 6    | 0.407264 | 0.927346 | 0.550580  | 0.908628  | 1.000      |
| 298 REACTOME-NEUTROPHIL-DEGRANULATION                 | R-RNO-6798695 | 6    | 0.414807 | 0.926485 | 0.585324  | 0.907362  | 1.000      |

Continuation of Table S8

| NAME | ID                                                | SIZE | ES       | NES      | NOM.p.val | FDR.q.val | FWER.p.val |
|------|---------------------------------------------------|------|----------|----------|-----------|-----------|------------|
| 299  | GOBP-PROTEIN_LOCALIZATION_TO_CELL_JUNCTION        | 6    | 0.397833 | 0.921168 | 0.575563  | 0.915602  | 1.000      |
| 300  | GOBP-GAMETE_GENERATION                            | 9    | 0.355826 | 0.920672 | 0.576983  | 0.913618  | 1.000      |
| 301  | GOBP-POSITIVE_REGULATION_OF_MOLECULAR_FUNCTION    | 37   | 0.253866 | 0.919332 | 0.568966  | 0.913434  | 1.000      |
| 302  | GOBP-RESPONSE_TO_REACTIVE_OXYGEN_SPECIES          | 8    | 0.369099 | 0.918985 | 0.571429  | 0.911168  | 1.000      |
| 303  | GOBP-POSITIVE_REGULATION_OF_DNA_BINDING_TRANSC... | 10   | 0.344294 | 0.918932 | 0.573718  | 0.908280  | 1.000      |
| 304  | GOBP-SMALL_MOLECULE_BIOSYNTHETIC_PROCESS          | 5    | 0.431932 | 0.918490 | 0.591837  | 0.906158  | 1.000      |
| 305  | GOBP-NEURON_APOPTOTIC_PROCESS                     | 12   | 0.321733 | 0.908973 | 0.583882  | 0.923634  | 1.000      |
| 306  | GOBP-PEPTIDE_BIOSYNTHETIC_PROCESS                 | 6    | 0.407264 | 0.906961 | 0.594077  | 0.924892  | 1.000      |
| 307  | GOBP-REGULATION_OF_ION_TRANSPORT                  | 36   | 0.248988 | 0.906657 | 0.583902  | 0.922581  | 1.000      |
| 308  | GOBP-ESTABLISHMENT_OF_PROTEIN_LOCALIZATION        | 17   | 0.290831 | 0.904299 | 0.599402  | 0.924406  | 1.000      |
| 309  | GOBP-REGULATION_OF_DEVELOPMENTAL_GROWTH           | 9    | 0.352029 | 0.904064 | 0.571429  | 0.921993  | 1.000      |
| 310  | GOBP-AMEBOIDAL_TYPE_CELL_MIGRATION                | 11   | 0.326439 | 0.903821 | 0.590980  | 0.919470  | 1.000      |
| 311  | GOBP-REGULATION_OF_HEMOPOIESIS                    | 10   | 0.336200 | 0.901923 | 0.594427  | 0.920550  | 1.000      |
| 312  | GOBP-LEUKOCYTE_CELL_CELL_ADHESION                 | 6    | 0.398548 | 0.899472 | 0.585209  | 0.922418  | 1.000      |
| 313  | GOBP-MONOAMINE_TRANSPORT                          | 5    | 0.422960 | 0.898652 | 0.612211  | 0.921107  | 1.000      |
| 314  | GOBP-DENDRITIC_SPINE_DEVELOPMENT                  | 6    | 0.397434 | 0.891762 | 0.609677  | 0.924132  | 1.000      |
| 315  | GOBP-NEGATIVE_REGULATION_OF_ANION_TRANSPORT       | 8    | 0.352444 | 0.891762 | 0.602761  | 0.929284  | 1.000      |
| 316  | REACTOME-ADAPTIVE_IMMUNE_SYSTEM                   | 9    | 0.348963 | 0.890813 | 0.594340  | 0.928382  | 1.000      |
| 317  | GOBP-RESPONSE_TO_BIOTIC_STIMULUS                  | 17   | 0.288691 | 0.890720 | 0.604106  | 0.925672  | 1.000      |
| 318  | GOBP-POSITIVE_REGULATION_OF_TRANSPERASE_ACTIVITY  | 19   | 0.279005 | 0.880034 | 0.626292  | 0.944098  | 1.000      |
| 319  | REACTOME-MAPK_TARGETS_NUCLEAR_EVENTS_MEDIATED...  | 5    | 0.407757 | 0.877732 | 0.639594  | 0.945867  | 1.000      |
| 320  | GOBP-POSITIVE_REGULATION_OF_ORGANELLE_ORGANIZA... | 10   | 0.331060 | 0.877701 | 0.613354  | 0.942987  | 1.000      |
| 321  | REACTOME_SIGNALING_BY_NTRK2_TRKB                  | 6    | 0.385972 | 0.877293 | 0.610282  | 0.940881  | 1.000      |
| 322  | GOBP-ORGANONITROGEN_COMPOUND_CATABOLIC_PROCESS    | 10   | 0.327478 | 0.876730 | 0.617886  | 0.939075  | 1.000      |
| 323  | GOBP-CELL_CELL_JUNCTION_ASSEMBLY                  | 5    | 0.407365 | 0.875615 | 0.613445  | 0.938195  | 1.000      |
| 324  | GOBP-RESPONSE_TO_PEPITIDE_HORMONE                 | 13   | 0.304436 | 0.873939 | 0.637747  | 0.938616  | 1.000      |
| 325  | GOBP-POSITIVE_REGULATION_OF_NEURON_PROJECTION...  | 5    | 0.417717 | 0.873912 | 0.646667  | 0.935776  | 1.000      |
| 326  | GOBP-REGULATION_OF_MITOTIC_CELL_CYCLE             | 5    | 0.405823 | 0.872542 | 0.635897  | 0.935650  | 1.000      |
| 327  | GOBP-DEVELOPMENTAL_GROWTH                         | 10   | 0.330048 | 0.872371 | 0.621875  | 0.933110  | 1.000      |
| 328  | GOBP-REGULATION_OF_MYELOID_LEUKOCYTE_DIFFERENT... | 8    | 0.349035 | 0.871666 | 0.610224  | 0.931570  | 1.000      |
| 329  | GOBP-REGULATION_OF_CELLULAR_AMIDE_METABOLIC_PR... | 9    | 0.334759 | 0.870242 | 0.630915  | 0.931515  | 1.000      |
| 330  | GOBP-CARBOHYDRATE_DERIVATIVE_BIOSYNTHETIC_PROCESS | 5    | 0.410411 | 0.865397 | 0.648557  | 0.938454  | 1.000      |
| 331  | GOBP-REGULATION_OF_TRANSMEMBRANE_TRANSPORT        | 23   | 0.259338 | 0.864858 | 0.630952  | 0.936731  | 1.000      |
| 332  | GOBP-REGULATION_OF_INTRACELLULAR_SIGNAL_TRANSD... | 21   | 0.265874 | 0.864661 | 0.631420  | 0.934288  | 1.000      |
| 333  | GOBP-MORPHOGENESIS_OF_AN_EPITHELIUM               | 6    | 0.382120 | 0.863905 | 0.659933  | 0.932876  | 1.000      |
| 334  | GOBP-MITOCHONDRION_ORGANIZATION                   | 7    | 0.363920 | 0.862446 | 0.661994  | 0.932936  | 1.000      |
| 335  | GOBP-NEGATIVE_REGULATION_OF_RESPONSE_TO_EXTERN... | 5    | 0.397421 | 0.862220 | 0.629948  | 0.930630  | 1.000      |
| 336  | GOBP-MUSCLE_CELL_PROLIFERATION                    | 8    | 0.344817 | 0.862010 | 0.623779  | 0.928261  | 1.000      |
| 337  | GOBP-REGULATION_OF_ANION_TRANSMEMBRANE_TRANSPORT  | 5    | 0.404242 | 0.858347 | 0.649919  | 0.932419  | 1.000      |
| 338  | HALLMARK_KRAS_SIGNALING_UP                        | 6    | 0.375118 | 0.857722 | 0.657665  | 0.930820  | 1.000      |
| 339  | GOBP-DEFENSE_RESPONSE_TO_OTHER_ORGANISM           | 9    | 0.330906 | 0.857605 | 0.653907  | 0.928176  | 1.000      |
| 340  | GOBP-POSITIVE_REGULATION_OF_NEURON_DEATH          | 5    | 0.398006 | 0.856966 | 0.654762  | 0.926676  | 1.000      |
| 341  | GOBP-POSITIVE_REGULATION_OF_LEUKOCYTE_CELL_CEL... | 5    | 0.394961 | 0.855219 | 0.681818  | 0.927250  | 1.000      |

Continuation of Table S8

|     | NAME                                              | ID            | SIZE | ES       | NES      | NOM.p.val | FDR.q.val | FWER.p.val |
|-----|---------------------------------------------------|---------------|------|----------|----------|-----------|-----------|------------|
| 342 | GOBP-POSITIVE-REGULATION_OF_SMALL-MOLECULE-MET... | GO-0062013    | 5    | 0.394061 | 0.851529 | 0.674576  | 0.931659  | 1.000      |
| 343 | HALLMARK-APOPTOSIS                                | M5902         | 6    | 0.371032 | 0.850826 | 0.649241  | 0.930326  | 1.000      |
| 344 | GOBP-CELL-GROWTH                                  | GO-0016049    | 10   | 0.315533 | 0.848633 | 0.653784  | 0.931572  | 1.000      |
| 345 | GOBP-POSITIVE-REGULATION_OF_CELL-CELL-ADHESION    | GO-0022409    | 5    | 0.394961 | 0.845794 | 0.659933  | 0.934217  | 1.000      |
| 346 | REACTOME-DISEASES-OF-SIGNAL-TRANSDUCTION-BY-GR... | R-HSA-5663202 | 12   | 0.298337 | 0.844743 | 0.668760  | 0.933562  | 1.000      |
| 347 | GOBP-POSITIVE-REGULATION_OF_SECRETION             | GO-0051047    | 6    | 0.379633 | 0.844214 | 0.671642  | 0.931761  | 1.000      |
| 348 | GOBP-CYTOKINE-PRODUCTION                          | GO-0001816    | 10   | 0.319721 | 0.843242 | 0.670330  | 0.931033  | 1.000      |
| 349 | GOBP-LEUKOCYTE-DIFFERENTIATION                    | GO-0002521    | 15   | 0.280259 | 0.842037 | 0.679412  | 0.930546  | 1.000      |
| 350 | GOBP-POSITIVE-REGULATION_OF_EPITHELIAL-CELL-MI... | GO-0010634    | 5    | 0.399720 | 0.841966 | 0.676768  | 0.928000  | 1.000      |
| 351 | GOBP-CELLULAR-RESPONSE-TO-HORMONE-STIMULUS        | GO-0032870    | 11   | 0.301490 | 0.841537 | 0.663158  | 0.926197  | 1.000      |
| 352 | GOBP-REGULATION-OF-LIPID-LOCALIZATION             | GO-1905952    | 5    | 0.386854 | 0.837652 | 0.659649  | 0.930629  | 1.000      |
| 353 | GOBP-POSITIVE-REGULATION_OF_TRANSMEMBRANE-TRAN... | GO-0034764    | 7    | 0.350120 | 0.837253 | 0.659677  | 0.928694  | 1.000      |
| 354 | REACTOME-DEATH-RECEPTOR-SIGNALING                 | R-RNO-73887   | 5    | 0.394931 | 0.835480 | 0.683849  | 0.929264  | 1.000      |
| 355 | GOBP-CIRCULATORY-SYSTEM-PROCESS                   | GO-0003013    | 5    | 0.393160 | 0.831678 | 0.708543  | 0.933569  | 1.000      |
| 356 | GOBP-LOCOMOTORY-BEHAVIOR                          | GO-0007626    | 8    | 0.328581 | 0.831548 | 0.672727  | 0.931205  | 1.000      |
| 357 | REACTOME-ANTI-INFLAMMATORY-RESPONSE-FAVOURING...  | R-HSA-9662851 | 5    | 0.394997 | 0.830515 | 0.699357  | 0.930542  | 1.000      |
| 358 | GOBP-NEGATIVE-REGULATION_OF_CELL-POPULATION-PR... | GO-0008285    | 9    | 0.322386 | 0.828292 | 0.697248  | 0.931860  | 1.000      |
| 359 | GOBP-NEGATIVE-REGULATION_OF-PHOSPHORUS-METABOL... | GO-0010563    | 9    | 0.319854 | 0.828122 | 0.675241  | 0.929548  | 1.000      |
| 360 | GOBP-REGULATION-OF-TRANS-SYNAPTIC-SIGNALING       | GO-0099177    | 40   | 0.230950 | 0.826860 | 0.705882  | 0.929204  | 1.000      |
| 361 | REACTOME-INTERLEUKIN-17-SIGNALING                 | R-RNO-448424  | 6    | 0.366655 | 0.824684 | 0.704620  | 0.930432  | 1.000      |
| 362 | GOBP-BIOLOGICAL-ADHESION                          | GO-0022610    | 19   | 0.259896 | 0.823198 | 0.696581  | 0.930703  | 1.000      |
| 363 | GOBP-REGULATION-OF-SYNAPTIC-TRANSMISSION-GLUTA... | GO-0051966    | 12   | 0.288064 | 0.821896 | 0.688207  | 0.930397  | 1.000      |
| 364 | GOBP-POSITIVE-REGULATION_OF_CELL-PROJECTION-OR... | GO-0031346    | 10   | 0.307494 | 0.821359 | 0.690513  | 0.928841  | 1.000      |
| 365 | GOBP-RESPONSE-TO-EXTRACELLULAR-STIMULUS           | GO-0009991    | 13   | 0.284228 | 0.820526 | 0.705279  | 0.927756  | 1.000      |
| 366 | GOBP-POSITIVE-REGULATION_OF_HEMOPOIESIS           | GO-1903708    | 7    | 0.339236 | 0.819816 | 0.676033  | 0.926405  | 1.000      |
| 367 | GOBP-CELLULAR-RESPONSE-TO-KETONE                  | GO-1901655    | 5    | 0.385603 | 0.818484 | 0.713299  | 0.926331  | 1.000      |
| 368 | GOBP-RESPONSE-TO-DRUG                             | GO-0042493    | 11   | 0.299335 | 0.816898 | 0.685215  | 0.926489  | 1.000      |
| 369 | GOBP-NEGATIVE-REGULATION_OF_NERVOUS-SYSTEM-DEV... | GO-0051961    | 5    | 0.381633 | 0.815470 | 0.734219  | 0.926507  | 1.000      |
| 370 | GOBP-SYNAPSE-ORGANIZATION                         | GO-0050808    | 17   | 0.258545 | 0.813414 | 0.719530  | 0.927444  | 1.000      |
| 371 | GOBP-CELLULAR-MACROMOLECULE-LOCALIZATION          | GO-0070727    | 20   | 0.247342 | 0.808786 | 0.720117  | 0.933050  | 1.000      |
| 372 | GOBP-NEGATIVE-REGULATION_OF_CELLULAR-COMPONENT... | GO-0051129    | 11   | 0.289179 | 0.807754 | 0.712934  | 0.932376  | 1.000      |
| 373 | GOBP-ORGANIC-HYDROXY-COMPOUND-TRANSPORT           | GO-0015850    | 6    | 0.354964 | 0.807369 | 0.701131  | 0.930581  | 1.000      |
| 374 | GOBP-FOREBRAIN-DEVELOPMENT                        | GO-0030900    | 10   | 0.303420 | 0.806909 | 0.719937  | 0.928831  | 1.000      |
| 375 | GOBP-SYNAPTIC-TRANSMISSION-GLUTAMATERGIC          | GO-0035249    | 13   | 0.281601 | 0.806858 | 0.706314  | 0.926470  | 1.000      |
| 376 | GOBP-ORGANIC-HYDROXY-COMPOUND-METABOLIC-PROCESS   | GO-1901615    | 8    | 0.312500 | 0.803844 | 0.709729  | 0.929198  | 1.000      |
| 377 | GOBP-REGULATION_OF-SYNAPSE-STRUCTURE-OR-ACTIVITY  | GO-0050803    | 11   | 0.288568 | 0.800278 | 0.708006  | 0.932485  | 1.000      |
| 378 | GOBP-NEGATIVE-REGULATION_OF-PROTEIN-MODIFICATI... | GO-0031400    | 10   | 0.300574 | 0.799051 | 0.732628  | 0.931987  | 1.000      |
| 379 | GOBP-NEGATIVE-REGULATION_OF-BIOSYNTHETIC-PROCESS  | GO-0008980    | 13   | 0.275581 | 0.790830 | 0.736999  | 0.931280  | 1.000      |
| 380 | GOBP-POSITIVE-REGULATION_OF_CELLULAR-COMPONENT... | GO-0044089    | 9    | 0.304809 | 0.790528 | 0.725522  | 0.931269  | 1.000      |
| 381 | GOBP-CATION-TRANSPORT                             | GO-0006812    | 25   | 0.232578 | 0.796186 | 0.755304  | 0.929377  | 1.000      |
| 382 | GOBP-REGULATION_OF-MULTICELLULAR-ORGANISMAL-DE... | GO-2000026    | 31   | 0.225423 | 0.796149 | 0.760962  | 0.927011  | 1.000      |
| 383 | GOBP-MUSCLE-STRUCTURE-DEVELOPMENT                 | GO-0061061    | 16   | 0.261437 | 0.795901 | 0.729771  | 0.924943  | 1.000      |
| 384 | GOBP-REGULATION-OF-ENDOTHELIAL-CELL-MIGRATION     | GO-0010594    | 5    | 0.371505 | 0.793322 | 0.718910  | 0.926977  | 1.000      |

Continuation of Table S8

|     | NAME                                              | ID           | SIZE | ES       | NES      | NOM.p.val | FDR.q.val | FWER.p.val |
|-----|---------------------------------------------------|--------------|------|----------|----------|-----------|-----------|------------|
| 385 | GOBP-T-CELL-ACTIVATION                            | GO-0042110   | 8    | 0.311792 | 0.792435 | 0.714968  | 0.926005  | 1.000      |
| 386 | GOBP-POSITIVE-REGULATION-OF-ESTABLISHMENT-OF-P... | GO-1904951   | 5    | 0.369980 | 0.792234 | 0.747856  | 0.923958  | 1.000      |
| 387 | GOBP-LEARNING                                     | GO-0007612   | 13   | 0.271170 | 0.792066 | 0.741486  | 0.921820  | 1.000      |
| 388 | GOBP-CELLULAR-RESPONSE-TO-PEPTIDE-HORMONE-STIM... | GO-0071375   | 9    | 0.301261 | 0.790186 | 0.737785  | 0.922297  | 1.000      |
| 389 | GOBP-NEGATIVE-REGULATION-OF-CELL-DEVELOPMENT      | GO-0010721   | 6    | 0.349192 | 0.789736 | 0.739683  | 0.920643  | 1.000      |
| 390 | GOBP-REGULATION-OF-GROWTH                         | GO-0040008   | 13   | 0.274262 | 0.789714 | 0.749221  | 0.918334  | 1.000      |
| 391 | REACTOME-TOLL-LIKE-RECEPTOR-TLR1_TLR2-CASCADE     | R-RNO-168179 | 8    | 0.310203 | 0.785535 | 0.754072  | 0.917797  | 1.000      |
| 392 | GOBP-SEXUAL-REPRODUCTION                          | GO-0019953   | 10   | 0.300119 | 0.788021 | 0.755267  | 0.916332  | 1.000      |
| 393 | GOBP-IN-UTERO-EMBRYONIC-DEVELOPMENT               | GO-0001701   | 8    | 0.318600 | 0.786135 | 0.739550  | 0.917103  | 1.000      |
| 394 | REACTOME-MYD88-INDEPENDENT-TLR4-CASCADE           | R-RNO-166166 | 8    | 0.310203 | 0.786064 | 0.728896  | 0.914881  | 1.000      |
| 395 | REACTOME-TOLL-LIKE-RECEPTOR-CASCADES              | R-RNO-168898 | 8    | 0.310203 | 0.785346 | 0.735910  | 0.913672  | 1.000      |
| 396 | REACTOME-TOLL-LIKE-RECEPTOR-9_TLR9-CASCADE        | R-RNO-168138 | 8    | 0.310203 | 0.785136 | 0.736066  | 0.911697  | 1.000      |
| 397 | GOBP-IMMUNE-SYSTEM-DEVELOPMENT                    | GO-0002520   | 17   | 0.250683 | 0.783089 | 0.770865  | 0.912517  | 1.000      |
| 398 | GOBP-MUSCLE-ORGAN-DEVELOPMENT                     | GO-0007517   | 9    | 0.304404 | 0.782533 | 0.751926  | 0.911141  | 1.000      |
| 399 | GOBP-CELLULAR-RESPONSE-TO-NITROGEN-COMPOUND       | GO-1901699   | 20   | 0.242638 | 0.780204 | 0.762391  | 0.912438  | 1.000      |
| 400 | GOBP-POSITIVE-REGULATION-OF-MAP-KINASE-ACTIVITY   | GO-0043406   | 6    | 0.343175 | 0.778795 | 0.732323  | 0.912304  | 1.000      |
| 401 | GOBP-NEGATIVE-REGULATION-OF-PROTEIN-CATABOLIC...  | GO-0042177   | 5    | 0.359196 | 0.778208 | 0.744538  | 0.910943  | 1.000      |
| 402 | GOBP-ACTIVATION-OF-MAPK-ACTIVITY                  | GO-0000187   | 6    | 0.343175 | 0.777692 | 0.743265  | 0.909440  | 1.000      |
| 403 | GOBP-CELL-CELL-ADHESION                           | GO-0098609   | 14   | 0.267576 | 0.777395 | 0.774390  | 0.907578  | 1.000      |
| 404 | GOBP-POSITIVE-REGULATION-OF-PEPTIDASE-ACTIVITY    | GO-0010952   | 7    | 0.317311 | 0.773866 | 0.734177  | 0.910555  | 1.000      |
| 405 | REACTOME-NUCLEAR-EVENTS-KINASE-AND-TRANSCRIPTI... | R-RNO-198725 | 11   | 0.277204 | 0.771880 | 0.732198  | 0.911372  | 1.000      |
| 406 | GOBP-ENDOCRINE-SYSTEM-DEVELOPMENT                 | GO-0035270   | 6    | 0.340687 | 0.770364 | 0.757009  | 0.911445  | 1.000      |
| 407 | GOBP-REGULATION-OF-PHOSPHATIDYLINOSITOL-3_KINA... | GO-0014066   | 6    | 0.335304 | 0.768954 | 0.750422  | 0.911330  | 1.000      |
| 408 | GOBP-GROWTH                                       | GO-0040007   | 14   | 0.258839 | 0.768222 | 0.751152  | 0.910227  | 1.000      |
| 409 | GOBP-POSITIVE-REGULATION-OF-CYSTEINE-TYPE-ENDO... | GO-2001056   | 7    | 0.317311 | 0.762180 | 0.772655  | 0.916924  | 1.000      |
| 410 | GOBP-RESPONSE-TO-LIPID                            | GO-0033993   | 19   | 0.233521 | 0.760477 | 0.787106  | 0.917257  | 1.000      |
| 411 | GOBP-NEGATIVE-REGULATION-OF-RESPONSE-TO-STIMULUS  | GO-0048585   | 16   | 0.247957 | 0.759614 | 0.765060  | 0.916298  | 1.000      |
| 412 | GOBP-RESPONSE-TO-ALKALOID                         | GO-0043279   | 5    | 0.355800 | 0.759044 | 0.792208  | 0.914930  | 1.000      |
| 413 | GOBP-CELLULAR-RESPONSE-TO-EXTERNAL-STIMULUS       | GO-0071496   | 10   | 0.281551 | 0.756410 | 0.774351  | 0.916543  | 1.000      |
| 414 | GOBP-NERVE-DEVELOPMENT                            | GO-0021675   | 9    | 0.292096 | 0.755192 | 0.788906  | 0.916172  | 1.000      |
| 415 | GOBP-ORGANIC-ACID-METABOLIC-PROCESS               | GO-0006082   | 7    | 0.312070 | 0.746952 | 0.780096  | 0.925727  | 1.000      |
| 416 | GOBP-RESPONSE-TO-PEPTIDE                          | GO-1901652   | 18   | 0.231424 | 0.737830 | 0.818318  | 0.936087  | 1.000      |
| 417 | GOBP-IMMUNE-RESPONSE-REGULATING-SIGNALING-PATHWAY | GO-000276    | 8    | 0.290419 | 0.735254 | 0.786859  | 0.937360  | 1.000      |
| 418 | GOBP-POSITIVE-REGULATION-OF-AXONOGENESIS          | GO-0050772   | 5    | 0.339464 | 0.732625 | 0.791946  | 0.938592  | 1.000      |
| 419 | GOBP-RESPONSE-TO-OXYGEN-LEVELS                    | GO-0070482   | 8    | 0.293408 | 0.731985 | 0.801887  | 0.937252  | 1.000      |
| 420 | GOBP-NEGATIVE-REGULATION-OF-NUCLEOBASE-CONTAIN... | GO-0045934   | 13   | 0.247796 | 0.730243 | 0.821981  | 0.937444  | 1.000      |
| 421 | GOBP-LYMPHOCYTE-ACTIVATION                        | GO-0046649   | 10   | 0.267213 | 0.727710 | 0.815748  | 0.938572  | 1.000      |
| 422 | GOBP-MAINTENANCE-OF-LOCATION                      | GO-0051235   | 7    | 0.302305 | 0.727826 | 0.798658  | 0.937597  | 1.000      |
| 423 | GOBP-REGULATION-OF-VASCULATURE-DEVELOPMENT        | GO-1901342   | 5    | 0.344698 | 0.726623 | 0.816225  | 0.935637  | 1.000      |
| 424 | GOBP-REGULATION-OF-ANATOMICAL-STRUCTURE-MORPHO... | GO-0022603   | 17   | 0.233126 | 0.725730 | 0.817379  | 0.934705  | 1.000      |
| 425 | GOBP-POSITIVE-REGULATION-OF-MYELOID-CELL-DIFFE... | GO-0045639   | 7    | 0.307659 | 0.722009 | 0.833608  | 0.937383  | 1.000      |
| 426 | GOBP-REGULATION-OF-DNA-BINDING-TRANSCRIPTION-F... | GO-0051090   | 16   | 0.236485 | 0.721933 | 0.847534  | 0.935304  | 1.000      |
| 427 | GOBP-HOMEOSTASIS-OF-NUMBER-OF-CELLS               | GO-0048872   | 5    | 0.345987 | 0.721138 | 0.821429  | 0.934159  | 1.000      |

Continuation of Table S8

| NAME | ID                                                 | SIZE          | ES | NES      | NOM.p.val | FDR.q.val | FWER.p.val |
|------|----------------------------------------------------|---------------|----|----------|-----------|-----------|------------|
| 428  | GOBP-REGULATION-OF-NEUROGENESIS                    | GO-0050767    | 14 | 0.242998 | 0.716996  | 0.816923  | 0.937268   |
| 429  | GOBP-FC-RECEPTOR-SIGNALING-PATHWAY                 | GO-0038093    | 8  | 0.290419 | 0.715695  | 0.822531  | 0.936764   |
| 430  | GOBP-ANION-TRANSMEMBRANE-TRANSPORT                 | GO-0098656    | 7  | 0.289420 | 0.713922  | 0.851097  | 0.936807   |
| 431  | GOBP-CELL-CELL-SIGNALING-BY-WNT                    | GO-0198738    | 7  | 0.296278 | 0.713176  | 0.846278  | 0.935548   |
| 432  | REACTOME-NERVOUS-SYSTEM-DEVELOPMENT                | R-RNO-9675108 | 14 | 0.242413 | 0.711681  | 0.860075  | 0.935417   |
| 433  | GOBP-POSITIVE-REGULATION-OF-MULTICELLULAR-ORGA...  | GO-0051240    | 32 | 0.201189 | 0.710331  | 0.863448  | 0.934995   |
| 434  | GOBP-CELL-JUNCTION-ASSEMBLY                        | GO-0034329    | 8  | 0.279590 | 0.710168  | 0.831818  | 0.933059   |
| 435  | GOBP-MATERNAL-PROCESS-INVOLVED-IN-FEMALE-PREGN...  | GO-0060135    | 5  | 0.335518 | 0.709035  | 0.829431  | 0.932337   |
| 436  | GOBP-TRANSMEMBRANE-RECEPTOR-PROTEIN-SERINE-THR...  | GO-0007178    | 6  | 0.315859 | 0.702517  | 0.836120  | 0.938281   |
| 437  | GOBP-RESPONSE-TO-ETHANOL                           | GO-0045471    | 5  | 0.323430 | 0.700264  | 0.856900  | 0.938924   |
| 438  | GOBP-REGULATION-OF-CYTOSKELETON-ORGANIZATION       | GO-0051493    | 5  | 0.329569 | 0.699766  | 0.831918  | 0.937445   |
| 439  | GOBP-VESICLE-MEDIATED-TRANSPORT-IN-SYNAPSE         | GO-0099003    | 7  | 0.294535 | 0.694658  | 0.829431  | 0.941487   |
| 440  | GOBP-POSITIVE-REGULATION-OF-CATION-TRANSMEMBRAN... | GO-1904064    | 5  | 0.320648 | 0.691599  | 0.873754  | 0.942878   |
| 441  | GOBP-REGULATION-OF-CELL-DEVELOPMENT                | GO-0060284    | 15 | 0.229648 | 0.690604  | 0.857143  | 0.941939   |
| 442  | GOBP-CELLULAR-RESPONSE-TO-ORGANIC-CYCCLIC-COMPOUND | GO-0071407    | 13 | 0.234275 | 0.683445  | 0.855639  | 0.947886   |
| 443  | GOBP-METAL-ION-HOMEOSTASIS                         | GO-0055065    | 14 | 0.226595 | 0.680277  | 0.875576  | 0.949360   |
| 444  | GOBP-EMBRYONIC-ORGAN-DEVELOPMENT                   | GO-0048568    | 7  | 0.283612 | 0.679925  | 0.853081  | 0.947612   |
| 445  | GOBP-INNATE-IMMUNE-RESPONSE                        | GO-0045087    | 7  | 0.283951 | 0.678606  | 0.859016  | 0.946985   |
| 446  | GOBP-RESPONSE-TO-CARBOHYDRATE                      | GO-0009743    | 5  | 0.316124 | 0.678533  | 0.867450  | 0.944925   |
| 447  | GOBP-REGULATION-OF-SIGNALING                       | GO-0010469    | 14 | 0.223878 | 0.673337  | 0.882261  | 0.948363   |
| 448  | GOBP-RESPONSE-TO-MONOSACCHARIDE                    | GO-0034284    | 5  | 0.316124 | 0.672474  | 0.885615  | 0.947135   |
| 449  | REACTOME-INTERFERON-SIGNALING                      | R-RNO-913531  | 6  | 0.302405 | 0.672344  | 0.880131  | 0.945167   |
| 450  | GOBP-NEGATIVE-REGULATION-OF-TRANSCRIPTION-BY-R...  | GO-0000122    | 10 | 0.248792 | 0.671990  | 0.865325  | 0.943408   |
| 451  | GOBP-POSITIVE-REGULATION-OF-PEPTIDYL-TYROSINE...   | GO-0050731    | 8  | 0.266278 | 0.670207  | 0.876161  | 0.943210   |
| 452  | GOBP-REGULATION-OF-PEPTIDYL-TYROSINE-PHOSPHORY...  | GO-0050730    | 9  | 0.255739 | 0.670059  | 0.888025  | 0.941313   |
| 453  | GOBP-AXON-DEVELOPMENT                              | GO-0061564    | 18 | 0.215632 | 0.669048  | 0.870968  | 0.940311   |
| 454  | GOBP-NEGATIVE-REGULATION-OF-KINASE-ACTIVITY        | GO-0033673    | 5  | 0.299632 | 0.654671  | 0.900000  | 0.952772   |
| 455  | GOBP-TRANSMEMBRANE-TRANSPORT                       | GO-0055085    | 27 | 0.188518 | 0.653054  | 0.905444  | 0.952259   |
| 456  | GOBP-PRIMIRNA-TRANSCRIPTION-BY-RNA-POLYMERASE-II   | GO-0061614    | 7  | 0.268801 | 0.647041  | 0.902973  | 0.956156   |
| 457  | GOBP-NEGATIVE-REGULATION-OF-TRANSFERASE-ACTIVITY   | GO-0051348    | 5  | 0.299632 | 0.643248  | 0.914634  | 0.957674   |
| 458  | GOBP-POSITIVE-REGULATION-OF-PRIMIRNA-TRANSCRI...   | GO-1902895    | 7  | 0.268801 | 0.640063  | 0.913540  | 0.958536   |
| 459  | GOBP-REGULATION-OF-MAPK-CASCADE                    | GO-0043408    | 13 | 0.221274 | 0.639833  | 0.907353  | 0.956645   |
| 460  | GOBP-CELLULAR-RESPONSE-TO-EXTRACELLULAR-STIMULUS   | GO-0031668    | 8  | 0.249104 | 0.638959  | 0.900813  | 0.955340   |
| 461  | REACTOME-LEISHMANIA-INFECTION                      | R-HSA-9658195 | 10 | 0.234170 | 0.638627  | 0.905956  | 0.953602   |
| 462  | GOBP-CELL-MORPHOGENESIS-INVOLVED-IN-NEURON-DIF...  | GO-0048667    | 22 | 0.194129 | 0.638581  | 0.912722  | 0.951583   |
| 463  | GOBP-REGULATION-OF-CELLULAR-COMPONENT-BIOGENESIS   | GO-0044087    | 10 | 0.237287 | 0.638313  | 0.926984  | 0.949765   |
| 464  | GOBP-CELL-MORPHOGENESIS-INVOLVED-IN-DIFFERENTI...  | GO-0000904    | 22 | 0.194129 | 0.633375  | 0.922401  | 0.952118   |
| 465  | GOBP-POSITIVE-REGULATION-OF-NERVOUS-SYSTEM-DEV...  | GO-0051962    | 12 | 0.219988 | 0.632319  | 0.902022  | 0.951022   |
| 466  | GOBP-PROTEIN-MODIFICATION-BY-SMALL-PROTEIN-CON...  | GO-0070647    | 7  | 0.267586 | 0.630601  | 0.929146  | 0.950468   |
| 467  | HALLMARK-HYPOXIA                                   | M5891         | 5  | 0.289757 | 0.628972  | 0.919672  | 0.949698   |
| 468  | GOBP-POSITIVE-REGULATION-OF-CELL-DEVELOPMENT       | GO-0010720    | 12 | 0.219988 | 0.627932  | 0.927100  | 0.948517   |
| 469  | GOBP-POSITIVE-REGULATION-OF-NEUROGENESIS           | GO-0050769    | 12 | 0.219988 | 0.625617  | 0.915873  | 0.948494   |
| 470  | GOBP-REGULATION-OF-MAP-KINASE-ACTIVITY             | GO-0043405    | 9  | 0.243214 | 0.621595  | 0.916129  | 0.949833   |

Continuation of Table S8

|     | NAME                                              | ID            | SIZE | ES        | NES       | NOM.p.val | FDR.q.val | FWER.p.val |
|-----|---------------------------------------------------|---------------|------|-----------|-----------|-----------|-----------|------------|
| 471 | GOBP-REGULATION-OF-CIRCADIAN-RHYTHM               | GO-0042752    | 7    | 0.253986  | 0.614443  | 0.911717  | 0.953731  | 1.000      |
| 472 | GOBP-POSITIVE-REGULATION-OF-CELL-DIFFERENTIATION  | GO-0045597    | 27   | 0.175149  | 0.607805  | 0.944915  | 0.956731  | 1.000      |
| 473 | GOBP-POSITIVE-REGULATION-OF-INTRACELLULAR-SIGN... | GO-1902533    | 14   | 0.201074  | 0.599680  | 0.950617  | 0.960341  | 1.000      |
| 474 | GOBP-RESPONSE-TO-INSULIN                          | GO-0032868    | 5    | 0.277108  | 0.593571  | 0.946218  | 0.962472  | 1.000      |
| 475 | GOBP-G-PROTEIN-COUPLED-RECEPTOR-SIGNALING-PATHWAY | GO-0007186    | 18   | 0.186823  | 0.582440  | 0.942222  | 0.967754  | 1.000      |
| 476 | GOBP-PURINE-CONTAINING-COMPOUND-METABOLIC-PROCESS | GO-0072521    | 6    | 0.255271  | 0.568945  | 0.956882  | 0.973543  | 1.000      |
| 477 | HALLMARK-UV-RESPONSE-UP                           | M5941         | 5    | 0.269483  | 0.565472  | 0.948387  | 0.973326  | 1.000      |
| 478 | GOBP-REGULATION-OF-AXONOGENESIS                   | GO-0050770    | 7    | 0.233223  | 0.557679  | 0.954248  | 0.975508  | 1.000      |
| 479 | GOBP-MUSCLE-TISSUE-DEVELOPMENT                    | GO-0060537    | 11   | 0.201726  | 0.556529  | 0.965723  | 0.974073  | 1.000      |
| 480 | GOBP-PROTEIN-LOCALIZATION-TO-POSTSYNAPSE          | GO-0062237    | 5    | 0.252372  | 0.543229  | 0.971235  | 0.978316  | 1.000      |
| 481 | GOBP-PROTEIN-LOCALIZATION-TO-SYNAPSE              | GO-0035418    | 5    | 0.252372  | 0.529382  | 0.971901  | 0.982193  | 1.000      |
| 482 | GOBP-CELL-SURFACE-RECEPTOR-SIGNALING-PATHWAY-I... | GO-1905114    | 15   | 0.164384  | 0.494930  | 0.978788  | 0.991200  | 1.000      |
| 483 | GOBP-REGULATION-OF-GTPASE-ACTIVITY                | GO-0043087    | 5    | 0.215819  | 0.465571  | 0.989667  | 0.995189  | 1.000      |
| 484 | REACTOME-CELLULAR-RESPONSES-TO-EXTERNAL-STIMULI   | R-RNO-8953897 | 11   | 0.167175  | 0.464879  | 0.995482  | 0.993217  | 1.000      |
| 485 | REACTOME-RNA-POLYMERASE-II-TRANSCRIPTION          | R-RNO-73857   | 20   | -0.123186 | -0.465799 | 1.000000  | 0.996698  | 1.000      |
| 486 | GOBP-STRIATED-MUSCLE-CELL-DIFFERENTIATION         | GO-0051146    | 9    | -0.164557 | -0.479524 | 0.994350  | 0.999266  | 1.000      |
| 487 | REACTOME-TRANSCRIPTIONAL-REGULATION-BY-MECP2      | R-RNO-8986944 | 7    | -0.191591 | -0.504664 | 0.997348  | 0.999203  | 1.000      |
| 488 | GOBP-MUSCLE-CELL-DIFFERENTIATION                  | GO-0042692    | 10   | -0.166667 | -0.514977 | 0.982906  | 1.000000  | 1.000      |
| 489 | REACTOME-SENESCENCE-ASSOCIATED-SECRETORY-PHENO... | R-RNO-2559582 | 6    | -0.222271 | -0.556103 | 0.967568  | 0.991866  | 1.000      |
| 490 | REACTOME-CELLULAR-SENESCENCE                      | R-RNO-2559583 | 11   | -0.222271 | -0.569412 | 0.964557  | 0.989928  | 1.000      |
| 491 | GOBP-ADENYLATE-CYCLASE-MODULATING-G-PROTEIN.CO... | GO-0007188    | 6    | -0.186940 | -0.587283 | 0.955556  | 0.984723  | 1.000      |
| 492 | REACTOME-FC-EPSILON-RECEPTOR-FCER1-SIGNALING      | R-RNO-2454202 | 7    | -0.239276 | -0.609136 | 0.923077  | 0.974938  | 1.000      |
| 493 | GOBP-HEAD-DEVELOPMENT                             | GO-0060322    | 23   | -0.160242 | -0.614755 | 0.947712  | 0.974944  | 1.000      |
| 494 | GOBP-ADENYLATE-CYCLASE-INHIBITING-G-PROTEIN.CO... | GO-0007193    | 9    | -0.215190 | -0.628394 | 0.924282  | 0.968275  | 1.000      |
| 495 | GOBP-FC-EPSILON-RECEPTOR-SIGNALING-PATHWAY        | GO-0038095    | 7    | -0.239276 | -0.635113 | 0.938667  | 0.966634  | 1.000      |
| 496 | GOBP-CIRCADIAN-REGULATION-OF-GENE-EXPRESSION      | GO-0032922    | 5    | -0.276140 | -0.646065 | 0.927273  | 0.960601  | 1.000      |
| 497 | GOBP-RESPONSE-TO-STARVATION                       | GO-0042594    | 5    | -0.283142 | -0.650781 | 0.903704  | 0.960487  | 1.000      |
| 498 | GOBP-RESPONSE-TO-INTERLEUKIN-1                    | GO-0070555    | 5    | -0.284838 | -0.653714 | 0.901809  | 0.961677  | 1.000      |
| 499 | GOBP-REGULATION-OF-NEUROTRANSMITTER-RECEPTOR-A... | GO-0099601    | 13   | -0.195481 | -0.654521 | 0.898551  | 0.965121  | 1.000      |
| 500 | GOBP-CELLULAR-RESPONSE-TO-STARVATION              | GO-0009267    | 5    | -0.283142 | -0.658682 | 0.904040  | 0.965534  | 1.000      |
| 501 | HALLMARK-TNFA-SIGNALING-VIA-NFKB                  | M5890         | 14   | -0.200888 | -0.661839 | 0.921630  | 0.966886  | 1.000      |
| 502 | GOBP-CARDIAC-MUSCLE-TISSUE-DEVELOPMENT            | GO-0048738    | 6    | -0.269587 | -0.670334 | 0.911616  | 0.961863  | 1.000      |
| 503 | GOBP-HEART-DEVELOPMENT                            | GO-0007507    | 6    | -0.269587 | -0.670944 | 0.874372  | 0.965380  | 1.000      |
| 504 | GOBP-CALCIUM-MEDIATED-SIGNALING                   | GO-0019728    | 10   | -0.227258 | -0.680030 | 0.889785  | 0.958847  | 1.000      |
| 505 | REACTOME-LONG-TERM-POTENTIATION                   | R-HSA-9620244 | 10   | -0.230769 | -0.681744 | 0.857143  | 0.961359  | 1.000      |
| 506 | GOBP-POSITIVE-REGULATION-OF-DEVELOPMENTAL-PROCESS | GO-0051094    | 32   | -0.162931 | -0.689288 | 0.910394  | 0.956818  | 1.000      |
| 507 | REACTOME-INTEGRATION-OF-ENERGY-METABOLISM         | R-RNO-163685  | 5    | -0.301928 | -0.695354 | 0.829146  | 0.953271  | 1.000      |
| 508 | HALLMARK-EPITHELIAL-MESENCHYMAL-TRANSITION        | M5930         | 5    | -0.300634 | -0.701377 | 0.851759  | 0.949871  | 1.000      |
| 509 | GOBP-CELLULAR-GLUCOSE-HOMEOSTASIS                 | GO-0001678    | 5    | -0.301575 | -0.705709 | 0.853659  | 0.948157  | 1.000      |
| 510 | GOBP-SMALL-GTPASE-MEDIATED-SIGNAL-TRANSDUCTION    | GO-0007264    | 8    | -0.255561 | -0.707676 | 0.864000  | 0.949793  | 1.000      |
| 511 | GOBP-ACTIVATION-OF-IMMUNE-RESPONSE                | GO-0002253    | 5    | -0.310665 | -0.712578 | 0.815789  | 0.947851  | 1.000      |
| 512 | GOBP-PROTEIN-MODIFICATION-BY-SMALL-PROTEIN-CON... | GO-0032446    | 6    | -0.292821 | -0.712630 | 0.798578  | 0.952225  | 1.000      |
| 513 | GOBP-NEGATIVE-REGULATION-OF-MULTICELLULAR_ORGA... | GO-0051241    | 15   | -0.206393 | -0.717870 | 0.851312  | 0.949263  | 1.000      |



Continuation of Table S8

| NAME                                                  | ID            | SIZE | ES        | NES       | NOM.p.val | FDR.q.val | FWER.p.val |
|-------------------------------------------------------|---------------|------|-----------|-----------|-----------|-----------|------------|
| 514 GOBP-REGULATION-OF-ORGAN-GROWTH                   | GO-0046620    | 5    | -0.312659 | -0.722558 | 0.816121  | 0.946963  | 1.000      |
| 515 GOBP-REGULATION-OF-PROTEIN-STABILITY              | GO-0031647    | 5    | -0.313842 | -0.728050 | 0.802564  | 0.943638  | 1.000      |
| 516 GOBP-NUCLEAR-TRANSPORT                            | GO-0051169    | 5    | -0.314507 | -0.730524 | 0.823232  | 0.944683  | 1.000      |
| 517 GOBP-CENTRAL-NERVOUS-SYSTEM-DEVELOPMENT           | GO-0007417    | 27   | -0.179942 | -0.731625 | 0.864780  | 0.947488  | 1.000      |
| 518 GOBP-ORGAN-GROWTH                                 | GO-0035265    | 5    | -0.312659 | -0.738010 | 0.798077  | 0.941715  | 1.000      |
| 519 GOBP-CHEMICAL-SYNAPTIC-TRANSMISSION_POSTSYNAPTIC  | GO-0099565    | 9    | -0.252468 | -0.739961 | 0.831551  | 0.943195  | 1.000      |
| 520 REACTOME-ONCOGENIC-MAPK-SIGNALING                 | R-HSA-6802957 | 5    | -0.321002 | -0.740085 | 0.805755  | 0.947628  | 1.000      |
| 521 REACTOME-PTEN-REGULATION                          | R-RNO-6807070 | 5    | -0.318334 | -0.741551 | 0.799032  | 0.949913  | 1.000      |
| 522 GOBP-CELLULAR-RESPONSE-TO-PEPTIDE                 | GO-1901653    | 13   | -0.231209 | -0.744935 | 0.817365  | 0.949101  | 1.000      |
| 523 GOBP-REGULATION-OF-MUSCLE-CELL-DIFFERENTIATION    | GO-0051147    | 6    | -0.292683 | -0.747040 | 0.773196  | 0.950145  | 1.000      |
| 524 GOBP-PEPTIDYL-TYROSINE-MODIFICATION               | GO-0018212    | 10   | -0.252156 | -0.756438 | 0.766017  | 0.939998  | 1.000      |
| 525 GOBP-IONOTROPIC-GLUTAMATE-RECEPTOR-SIGNALING_P... | GO-0035235    | 9    | -0.260686 | -0.757500 | 0.780899  | 0.943010  | 1.000      |
| 526 GOBP-MAPK-CASCADE                                 | GO-0000165    | 18   | -0.208081 | -0.758138 | 0.804416  | 0.946671  | 1.000      |
| 527 GOBP-CELLULAR-RESPONSE-TO-ALCOHOL                 | GO-0097306    | 5    | -0.320362 | -0.761673 | 0.772947  | 0.945356  | 1.000      |
| 528 GOBP-NEGATIVE-REGULATION-OF-GENE-EXPRESSION       | GO-0010629    | 11   | -0.254639 | -0.762293 | 0.763736  | 0.949217  | 1.000      |
| 529 GOBP-ADENYLATE-CYCLASE-INHIBITING-G-PROTEIN.CO... | GO-0007196    | 5    | -0.319039 | -0.762907 | 0.771290  | 0.952937  | 1.000      |
| 530 GOBP-CELLULAR-RESPONSE-TO-MOLECULE-OF-BACTERIA... | GO-0071219    | 8    | -0.282041 | -0.766307 | 0.744681  | 0.951783  | 1.000      |
| 531 GOBP-PROTEIN-AUTOPHOSPHORYLATION                  | GO-0046777    | 5    | -0.333459 | -0.771511 | 0.712737  | 0.947897  | 1.000      |
| 532 GOBP-LONG-TERM-SYNAPTIC-POTENTIATION              | GO-0060291    | 12   | -0.240740 | -0.772275 | 0.752022  | 0.951451  | 1.000      |
| 533 REACTOME-DAG-AND-JP3-SIGNALING                    | R-RNO-1489509 | 8    | -0.290713 | -0.790385 | 0.737127  | 0.923639  | 1.000      |
| 534 GOBP-POSITIVE-REGULATION-OF-CELL-ADHESION         | GO-0045785    | 7    | -0.302610 | -0.791134 | 0.694581  | 0.927062  | 1.000      |
| 535 GOBP-CELLULAR-RESPONSE-TO-BIOTIC-STIMULUS         | GO-0071216    | 8    | -0.282041 | -0.800740 | 0.724311  | 0.914688  | 1.000      |
| 536 GOBP-NEGATIVE-REGULATION-OF-PHOSPHORYLATION       | GO-0042326    | 7    | -0.311726 | -0.807121 | 0.682081  | 0.907340  | 1.000      |
| 537 GOBP-CELLULAR-RESPONSE-TO-LIPID                   | GO-0071396    | 15   | -0.234555 | -0.808222 | 0.741379  | 0.910224  | 1.000      |
| 538 REACTOME-GPCR-LIGAND-BINDING                      | R-RNO-500792  | 8    | -0.288029 | -0.808524 | 0.722222  | 0.914539  | 1.000      |
| 539 GOBP-MULTICELLULAR-ORGANISM-REPRODUCTION          | GO-0032504    | 12   | -0.258422 | -0.808606 | 0.718391  | 0.919281  | 1.000      |
| 540 GOBP-CELL-CYCLE-PROCESS                           | GO-0022402    | 11   | -0.257776 | -0.811495 | 0.698864  | 0.918671  | 1.000      |
| 541 GOBP-CATION-TRANSMEMBRANE-TRANSPORT               | GO-0098655    | 18   | -0.218817 | -0.816378 | 0.725490  | 0.914094  | 1.000      |
| 542 GOBP-POSITIVE-REGULATION-OF-MAPK-CASCADE          | GO-0043410    | 9    | -0.287201 | -0.818418 | 0.705882  | 0.915203  | 1.000      |
| 543 GOBP-REGULATION-OF-CELL-CYCLE                     | GO-0051726    | 13   | -0.245352 | -0.818842 | 0.686813  | 0.919376  | 1.000      |
| 544 GOBP-RESPONSE-TO-WOUNDING                         | GO-0009611    | 15   | -0.234839 | -0.820998 | 0.708475  | 0.920329  | 1.000      |
| 545 GOBP-REGULATION-OF-CATION-TRANSMEMBRANE-TRANSPORT | GO-1904062    | 16   | -0.232584 | -0.827636 | 0.732558  | 0.912503  | 1.000      |
| 546 GOBP-CENTRAL-NERVOUS-SYSTEM-NEURON-DIFFERENTIA... | GO-0021953    | 5    | -0.354529 | -0.830699 | 0.669951  | 0.911536  | 1.000      |
| 547 GOBP-ORGANIC-ACID-TRANSPORT                       | GO-0015849    | 7    | -0.312483 | -0.831154 | 0.661247  | 0.915790  | 1.000      |
| 548 GOBP-SYNAPTIC-SIGNALING                           | GO-0099536    | 47   | -0.189830 | -0.831195 | 0.736111  | 0.920901  | 1.000      |
| 549 GOBP-REGULATION-OF-LEUKOCYTE-DIFFERENTIATION      | GO-1902105    | 9    | -0.287349 | -0.834592 | 0.683924  | 0.919064  | 1.000      |
| 550 GOBP-INTRACELLULAR-RECEPTOR-SIGNALING-PATHWAY     | GO-0030522    | 5    | -0.361446 | -0.835666 | 0.635697  | 0.922308  | 1.000      |
| 551 GOBP-DEVELOPMENTAL-PROCESS-INVOLVED-IN-REPRODU... | GO-0003006    | 11   | -0.271677 | -0.837441 | 0.678679  | 0.924002  | 1.000      |
| 552 GOBP-SENSORY_PERCEPTION-OF_PAIN                   | GO-0019233    | 5    | -0.356824 | -0.846704 | 0.647754  | 0.909909  | 1.000      |
| 553 REACTOME-L1CAM-INTERACTIONS                       | R-RNO-373760  | 5    | -0.371938 | -0.847899 | 0.641278  | 0.912885  | 1.000      |
| 554 GOBP-TELENCEPHALON-DEVELOPMENT                    | GO-0021537    | 7    | -0.327266 | -0.854563 | 0.620948  | 0.904387  | 1.000      |
| 555 GOBP-REGULATION-OF-NERVOUS-SYSTEM-PROCESS         | GO-0031644    | 8    | -0.315250 | -0.854785 | 0.656250  | 0.909208  | 1.000      |
| 556 GOBP-RAS-PROTEIN-SIGNAL-TRANSDUCTION              | GO-0007265    | 5    | -0.369032 | -0.861333 | 0.619403  | 0.900406  | 1.000      |

Continuation of Table S8

| NAME                                                    | ID           | SIZE | ES        | NES       | NOM.p.val | FDR.q.val | FWER.p.val |
|---------------------------------------------------------|--------------|------|-----------|-----------|-----------|-----------|------------|
| 557 GOBP_ERBB_SIGNALING_PATHWAY                         | GO:0038127   | 5    | -0.370318 | -0.862676 | 0.600000  | 0.902787  | 1.000      |
| 558 GOBP_DEVELOPMENTAL_MATURATION                       | GO:0021700   | 5    | -0.376095 | -0.871410 | 0.606138  | 0.889387  | 1.000      |
| 559 GOBP_RESPONSE_TO_ORGANIC_CYCLIC_COMPOUND            | GO:0014070   | 20   | -0.232127 | -0.871425 | 0.692568  | 0.894716  | 1.000      |
| 560 GOBP_PROTEIN_LOCALIZATION_TO_ORGANELLE              | GO:0033365   | 8    | -0.316730 | -0.872468 | 0.643052  | 0.898238  | 1.000      |
| 561 GOBP_MONONUCLEAR_CELL_DIFFERENTIATION               | GO:1903131   | 7    | -0.337335 | -0.876423 | 0.587786  | 0.895279  | 1.000      |
| 562 GOBP_WOUND_HEALING                                  | GO:0042060   | 13   | -0.266552 | -0.878041 | 0.619048  | 0.897100  | 1.000      |
| 563 GOBP_ORGANOPHOSPHATE_METABOLIC_PROCESS              | GO:0019637   | 8    | -0.321259 | -0.878735 | 0.605744  | 0.901120  | 1.000      |
| 564 GOBP_MITOTIC_CELL_CYCLE                             | GO:0000278   | 10   | -0.295074 | -0.884707 | 0.584856  | 0.893021  | 1.000      |
| 565 GOBP_CELL_CYCLE                                     | GO:0007049   | 21   | -0.232014 | -0.884755 | 0.616822  | 0.898536  | 1.000      |
| 566 GOBP_DIVALENT_INORGANIC_CATION_HOMEOSTASIS          | GO:0072507   | 13   | -0.268182 | -0.884754 | 0.605042  | 0.904078  | 1.000      |
| 567 GOBP_REGULATION_OF_CYTOSOLIC_CALCIIUM_IION_CONCE... | GO:0051480   | 13   | -0.268182 | -0.890004 | 0.606838  | 0.897193  | 1.000      |
| 568 GOBP_RESPONSE_TO_OXYGEN_CONTAINING_COMPOUND         | GO:1901700   | 39   | -0.207382 | -0.896827 | 0.620301  | 0.887863  | 1.000      |
| 569 REACTOME_UNBLOCKING_OF_NMDA_RECEPTORS_GLUTAMAT...   | R-RNO-438066 | 12   | -0.272492 | -0.899131 | 0.563050  | 0.888443  | 1.000      |
| 570 GOBP_REGULATION_OF_CELL_ADHESION                    | GO:0030155   | 13   | -0.269920 | -0.903591 | 0.570652  | 0.883910  | 1.000      |
| 571 GOBP_REGULATION_OF_NEURONAL_SYNAPTIC_PLASTICITY     | GO:0048168   | 7    | -0.347838 | -0.903920 | 0.550532  | 0.888955  | 1.000      |
| 572 GOBP_REGULATION_OF_SYNAPTIC_PLASTICITY              | GO:0048167   | 21   | -0.239425 | -0.911706 | 0.595819  | 0.876946  | 1.000      |
| 573 GOBP_TISSUE_MIGRATION                               | GO:0090130   | 9    | -0.316349 | -0.913044 | 0.563636  | 0.879695  | 1.000      |
| 574 GOBP_POSITIVE_REGULATION_OF_TRANSCRIPTION_BY_R...   | GO:0045944   | 24   | -0.235271 | -0.914474 | 0.607029  | 0.882010  | 1.000      |
| 575 GOBP_NUCLEOBASE_CONTAINING_SMALL_MOLECULE_META...   | GO:0055086   | 7    | -0.352207 | -0.918375 | 0.519231  | 0.878980  | 1.000      |
| 576 GOBP_SIGNAL_RELEASE                                 | GO:0023061   | 14   | -0.268200 | -0.921973 | 0.573370  | 0.876616  | 1.000      |
| 577 GOBP_FATTY_ACID_TRANSPORT                           | GO:0015908   | 6    | -0.361819 | -0.926370 | 0.524155  | 0.872310  | 1.000      |
| 578 GOBP_REGULATION_OF_TRANSPORTER_ACTIVITY             | GO:0032409   | 17   | -0.266553 | -0.928805 | 0.530547  | 0.872441  | 1.000      |
| 579 GOBP_CELLULAR_COMPONENT_MAINTENANCE                 | GO:0043954   | 5    | -0.394519 | -0.930372 | 0.509434  | 0.874593  | 1.000      |
| 580 GOBP_EMBRYO_DEVELOPMENT_ENDING_IN_BIRTH_OR_EGG...   | GO:0009792   | 9    | -0.324472 | -0.937194 | 0.502645  | 0.864421  | 1.000      |
| 581 GOBP_EXCITATORY_CHEMICAL_SYNAPTIC_TRANSMISSION      | GO:0098976   | 5    | -0.409639 | -0.937537 | 0.487245  | 0.869577  | 1.000      |
| 582 GOBP_REGULATION_OF_CATION_CHANNEL_ACTIVITY          | GO:2001257   | 14   | -0.279167 | -0.939720 | 0.539157  | 0.870167  | 1.000      |
| 583 GOBP_REGULATION_OF_MEMBRANE_POTENTIAL               | GO:0042391   | 17   | -0.252523 | -0.946615 | 0.529781  | 0.859462  | 1.000      |
| 584 GOBP_NEGATIVE_REGULATION_OF_TRANSPORT               | GO:0051051   | 13   | -0.288460 | -0.947089 | 0.506631  | 0.864343  | 1.000      |
| 585 GOBP_INTRACELLULAR_TRANSPORT                        | GO:0046907   | 10   | -0.316758 | -0.947826 | 0.528875  | 0.868353  | 1.000      |
| 586 GOBP_TUBE_MORPHOGENESIS                             | GO:0035239   | 15   | -0.279874 | -0.948872 | 0.501520  | 0.872055  | 1.000      |
| 587 GOBP_REGULATION_OF_POSTSYNAPTIC_MEMBRANE_POTEN...   | GO:0060078   | 14   | -0.279329 | -0.949256 | 0.488439  | 0.877298  | 1.000      |
| 588 GOBP_RESPONSE_TO_HORMONE                            | GO:0009725   | 20   | -0.250457 | -0.952379 | 0.524845  | 0.876172  | 1.000      |
| 589 GOBP_NEGATIVE_REGULATION_OF_CELL_PROJECTION_OR...   | GO:0031345   | 5    | -0.412094 | -0.952807 | 0.497449  | 0.881728  | 1.000      |
| 590 GOBP_DNA_METABOLIC_PROCESS                          | GO:0066259   | 6    | -0.389550 | -0.964045 | 0.497561  | 0.860745  | 1.000      |
| 591 GOBP_REGULATION_OF_BODY_FLUID_LEVELS                | GO:0050878   | 11   | -0.313154 | -0.969118 | 0.491071  | 0.855000  | 1.000      |
| 592 GOBP_CELLULAR_RESPONSE_TO_OXYGEN_CONTAINING_CO...   | GO:1901701   | 29   | -0.229191 | -0.970686 | 0.501639  | 0.857879  | 1.000      |
| 593 GOBP_CELL_JUNCTION_ORGANIZATION                     | GO:0034330   | 19   | -0.263086 | -0.976853 | 0.512195  | 0.849215  | 1.000      |
| 594 GOBP_PEPITIDYL_LYSINE_MODIFICATION                  | GO:0018205   | 5    | -0.421687 | -0.978067 | 0.459135  | 0.852612  | 1.000      |
| 595 GOBP_POSTTRANSCRIPTIONAL_REGULATION_OF_GENE_EX...   | GO:0010608   | 8    | -0.355705 | -0.982209 | 0.435530  | 0.846020  | 1.000      |
| 596 GOBP_CIRCADIEN_RHYTHM                               | GO:0007623   | 13   | -0.301943 | -0.986396 | 0.448179  | 0.844412  | 1.000      |
| 597 GOBP_NEGATIVE_REGULATION_OF_CELL_CYCLE              | GO:0045786   | 5    | -0.422990 | -0.989018 | 0.439153  | 0.844602  | 1.000      |
| 598 GOBP_IION_HOMEOSTASIS                               | GO:0050801   | 16   | -0.285720 | -0.992548 | 0.498442  | 0.842587  | 1.000      |
| 599 GOBP_NUCLEOSIDE_PHOSPHATE_BIOSYNTHETIC_PROCESS      | GO:1901293   | 5    | -0.433867 | -0.994340 | 0.402564  | 0.844711  | 1.000      |

Continuation of Table S8

| NAME                                                  | ID            | SIZE | ES        | NES       | NOM.p.val | FDR.q.val | FWER.p.val |
|-------------------------------------------------------|---------------|------|-----------|-----------|-----------|-----------|------------|
| 600 GOBP-POSITIVE-REGULATION-OF-CELL-POPULATION.PR... | GO-0008284    | 21   | -0.257296 | -0.994828 | 0.454248  | 0.850271  | 1.000      |
| 601 REACTOME-ACTIVATION-OF-NMDA-RECEPTORS-AND-POST... | R-RNO-442755  | 16   | -0.285815 | -0.997261 | 0.449686  | 0.850728  | 1.000      |
| 602 GOBP-ORGANOPHOSPHATE-BIOSYNTHETIC-PROCESS         | GO-0090407    | 5    | -0.433867 | -1.000910 | 0.405941  | 0.848062  | 1.000      |
| 603 GOBP-REGULATION-OF-LYMPHOCYTE-ACTIVATION          | GO-0051249    | 5    | -0.432380 | -1.002407 | 0.426316  | 0.851182  | 1.000      |
| 604 GOBP-CELL-CELL-SIGNALING                          | GO-0007267    | 56   | -0.228109 | -1.011132 | 0.488722  | 0.835959  | 1.000      |
| 605 GOBP-SENSORY-ORGAN-DEVELOPMENT                    | GO-0007423    | 8    | -0.372816 | -1.015803 | 0.442815  | 0.831057  | 1.000      |
| 606 GOBP-CHROMATIN-ORGANIZATION                       | GO-0006325    | 5    | -0.440684 | -1.017015 | 0.417874  | 0.835256  | 1.000      |
| 607 REACTOME-SYNAPTIC-ADHESION-LIKE-MOLECULES         | R-RNO-8849932 | 9    | -0.347305 | -1.020435 | 0.400576  | 0.833454  | 1.000      |
| 608 GOBP-NEUROTRANSMITTER-SECRETION                   | GO-0007269    | 6    | -0.409184 | -1.025063 | 0.410811  | 0.828958  | 1.000      |
| 609 GOBP-PEPTIDYL-AMINO-ACID-MODIFICATION             | GO-0018193    | 22   | -0.271854 | -1.029677 | 0.386503  | 0.824282  | 1.000      |
| 610 REACTOME-OPIOID-SIGNALING                         | R-RNO-111885  | 12   | -0.316767 | -1.030936 | 0.371681  | 0.828131  | 1.000      |
| 611 REACTOME-G-ALPHA-I-SIGNALING-EVENTS               | R-RNO-418594  | 18   | -0.285294 | -1.040324 | 0.395137  | 0.811748  | 1.000      |
| 612 GOBP-HOMEOSTATIC-PROCESS                          | GO-0042592    | 31   | -0.246966 | -1.042359 | 0.401274  | 0.814144  | 1.000      |
| 613 REACTOME-SIGNALING-BY-GPCR                        | R-RNO-372790  | 22   | -0.270965 | -1.046192 | 0.403786  | 0.811893  | 1.000      |
| 614 GOBP-EPIDERMIS-DEVELOPMENT                        | GO-0008544    | 5    | -0.450774 | -1.059160 | 0.340852  | 0.785794  | 1.000      |
| 615 GOBP-MUSCLE-CONTRACTION                           | GO-0006936    | 5    | -0.469880 | -1.065673 | 0.361179  | 0.776254  | 1.000      |
| 616 GOBP-REGULATION-OF-CELL-CELL-ADHESION             | GO-0022407    | 9    | -0.366146 | -1.069118 | 0.362117  | 0.774713  | 1.000      |
| 617 GOBP-CIRCULATORY-SYSTEM-DEVELOPMENT               | GO-00072359   | 21   | -0.279545 | -1.071580 | 0.366883  | 0.775759  | 1.000      |
| 618 GOBP-EMBRYO-DEVELOPMENT                           | GO-0009790    | 14   | -0.313255 | -1.077867 | 0.348571  | 0.767392  | 1.000      |
| 619 GOBP-REGULATION-OF-CELL-ACTIVATION                | GO-00050865   | 8    | -0.393407 | -1.082446 | 0.331461  | 0.763416  | 1.000      |
| 620 GOBP-NEURON-MIGRATION                             | GO-0001764    | 5    | -0.469880 | -1.083499 | 0.332524  | 0.768072  | 1.000      |
| 621 GOBP-POSITIVE-REGULATION-OF-CELLULAR-PROTEIN-L... | GO-1903829    | 7    | -0.400618 | -1.084911 | 0.338462  | 0.771478  | 1.000      |
| 622 GOBP-CHEMICAL-HOMEOSTASIS                         | GO-0048878    | 23   | -0.273175 | -1.085782 | 0.331190  | 0.776773  | 1.000      |
| 623 REACTOME-HEMOSTASIS                               | R-RNO-109582  | 14   | -0.320999 | -1.086846 | 0.336449  | 0.781740  | 1.000      |
| 624 GOBP-REGULATION-OF-SYSTEM-PROCESS                 | GO-0044057    | 18   | -0.302034 | -1.090419 | 0.305556  | 0.780171  | 1.000      |
| 625 GOBP-BLOOD-VESSEL-ENDOTHELIAL-CELL-MIGRATION      | GO-0043534    | 8    | -0.390442 | -1.092668 | 0.320113  | 0.782170  | 1.000      |
| 626 GOBP-REPRODUCTIVE-SYSTEM-DEVELOPMENT              | GO-0061458    | 6    | -0.450453 | -1.095566 | 0.338624  | 0.782525  | 1.000      |
| 627 GOBP-ORGANONITROGEN-COMPOUND-BIOSYNTHETIC-PROCESS | GO-1901566    | 13   | -0.324641 | -1.096678 | 0.299145  | 0.787230  | 1.000      |
| 628 GOBP-PHAGOCYTOSIS                                 | GO-0006909    | 5    | -0.467382 | -1.097065 | 0.316832  | 0.794352  | 1.000      |
| 629 REACTOME-G-ALPHA-Z-SIGNALING-EVENTS               | R-RNO-418597  | 5    | -0.471752 | -1.099171 | 0.322251  | 0.797661  | 1.000      |
| 630 GOBP-ENDOTHELIAL-CELL-MIGRATION                   | GO-0043542    | 8    | -0.390442 | -1.100108 | 0.299728  | 0.803577  | 1.000      |
| 631 GOBP-POSITIVE-REGULATION-OF-APOPTOTIC-SIGNALIN... | GO-2001235    | 5    | -0.468288 | -1.100532 | 0.330864  | 0.810934  | 1.000      |
| 632 REACTOME-SIGNALING-BY-WNT                         | R-RNO-195721  | 7    | -0.420337 | -1.105882 | 0.290640  | 0.805106  | 1.000      |
| 633 GOBP-CALCIUM-ION-TRANSMEMBRANE-TRANSPORT          | GO-0070588    | 7    | -0.424147 | -1.110710 | 0.280105  | 0.800752  | 1.000      |
| 634 GOBP-CALCIUM-ION-TRANSPORT-INTO-CYTOSOL           | GO-0060402    | 7    | -0.424147 | -1.117466 | 0.304239  | 0.792073  | 1.000      |
| 635 GOBP-ENDOMEMBRANE-SYSTEM-ORGANIZATION             | GO-0010256    | 6    | -0.449637 | -1.117554 | 0.293532  | 0.800688  | 1.000      |
| 636 GOBP-CYTOSOLIC-CALCIUM-ION-TRANSPORT              | GO-0060401    | 7    | -0.424147 | -1.118174 | 0.289406  | 0.807864  | 1.000      |
| 637 GOBP-ERK1-AND-ERK2-CASCADE                        | GO-0070371    | 5    | -0.48402  | -1.121050 | 0.298969  | 0.808653  | 1.000      |
| 638 GOBP-BLOOD-VESSEL-MORPHOGENESIS                   | GO-0048514    | 14   | -0.322893 | -1.121898 | 0.268908  | 0.815701  | 1.000      |
| 639 GOBP-MUSCLE-CELL-DEVELOPMENT                      | GO-0055001    | 5    | -0.469880 | -1.125702 | 0.278772  | 0.814871  | 1.000      |
| 640 GOBP-SENSORY_PERCEPTION                           | GO-0007600    | 9    | -0.387885 | -1.130130 | 0.296296  | 0.811991  | 1.000      |
| 641 GOBP-GLUTAMATE-RECEPTOR-SIGNALING-PATHWAY         | GO-0007215    | 17   | -0.312382 | -1.131526 | 0.258462  | 0.817675  | 1.000      |
| 642 GOBP-LIPID-LOCALIZATION                           | GO-0010876    | 10   | -0.374061 | -1.132740 | 0.260054  | 0.824113  | 1.000      |

Continuation of Table S8

| NAME | ID                                                | SIZE | ES        | NES       | NOM.p.val | FDR.q.val | FWER.p.val |
|------|---------------------------------------------------|------|-----------|-----------|-----------|-----------|------------|
| 643  | GOBP-ANIMAL-ORGAN-MORPHOGENESIS                   | 12   | -0.350059 | -1.133052 | 0.271084  | 0.833153  | 1.000      |
| 644  | GOBP-INTRACELLULAR-PROTEIN-TRANSPORT              | 8    | -0.411156 | -1.133831 | 0.279070  | 0.840925  | 1.000      |
| 645  | GOBP-POSITIVE-REGULATION-OF-PROTEIN-METABOLIC...  | 27   | -0.270975 | -1.139933 | 0.242902  | 0.832962  | 1.000      |
| 646  | GOBP-REGULATION-OF-SECRETION                      | 14   | -0.339192 | -1.141279 | 0.253731  | 0.839358  | 1.000      |
| 647  | GOBP-EPITHELIUM-DEVELOPMENT                       | 15   | -0.329356 | -1.147356 | 0.266254  | 0.833476  | 1.000      |
| 648  | GOBP-POSITIVE-REGULATION-OF-BIOSYNTHETIC-PROCESS  | 27   | -0.276951 | -1.151029 | 0.224561  | 0.833618  | 1.000      |
| 649  | REACTOME-NEUROTRANSMITTER-RECEPTORS-AND-POSTSY... | 22   | -0.305125 | -1.156845 | 0.245342  | 0.827267  | 1.000      |
| 650  | GOBP-CELLULAR-RESPONSE-TO-DNA-DAMAGE-STIMULUS     | 5    | -0.492868 | -1.157290 | 0.250000  | 0.836938  | 1.000      |
| 651  | GOBP-REGULATION-OF-TRANSPORT                      | 44   | -0.264398 | -1.157381 | 0.242308  | 0.847915  | 1.000      |
| 652  | REACTOME-NEGATIVE-REGULATION-OF-NMDA-RECEPTOR-... | 8    | -0.425000 | -1.165445 | 0.263587  | 0.835931  | 1.000      |
| 653  | REACTOME-CELL-CYCLE-MITOTIC                       | 5    | -0.512472 | -1.169057 | 0.270208  | 0.836588  | 1.000      |
| 654  | REACTOME-G-PROTEIN-MEDIATED-EVENTS                | 9    | -0.404509 | -1.176073 | 0.247222  | 0.826860  | 1.000      |
| 655  | REACTOME-CLASS-C.3-METABOTROPIC-GLUTAMATE-PHER... | 7    | -0.438878 | -1.181698 | 0.273196  | 0.822243  | 1.000      |
| 656  | GOBP-SECOND-MESSENGER-MEDIATED-SIGNALING          | 16   | -0.335163 | -1.181712 | 0.232416  | 0.834159  | 1.000      |
| 657  | GOBP-RESPONSE-TO-HEAT                             | 7    | -0.454547 | -1.186666 | 0.230137  | 0.832000  | 1.000      |
| 658  | GOBP-INORGANIC-ION-TRANSMEMBRANE-TRANSPORT        | 9    | -0.410062 | -1.189560 | 0.220207  | 0.835034  | 1.000      |
| 659  | GOBP-G-PROTEIN-COUPLED-GLUTAMATE-RECEPTOR-SIGN... | 8    | -0.426943 | -1.189989 | 0.257895  | 0.846391  | 1.000      |
| 660  | GOBP-CELLULAR-MACROMOLECULE-CATABOLIC-PROCESS     | 5    | -0.528778 | -1.194974 | 0.250000  | 0.844238  | 1.000      |
| 661  | GOBP-REGULATION-OF-NMDA-RECEPTOR-ACTIVITY         | 10   | -0.392088 | -1.197114 | 0.238606  | 0.850653  | 1.000      |
| 662  | REACTOME-INTRACELLULAR-SIGNALING-BY-SECOND-MES... | 15   | -0.354260 | -1.198532 | 0.206395  | 0.860017  | 1.000      |
| 663  | REACTOME-ASSEMBLY-AND-CELL-SURFACE-PRESENTATIO... | 8    | -0.425000 | -1.200109 | 0.211082  | 0.868937  | 1.000      |
| 664  | REACTOME-PLATELET-ACTIVATION-SIGNALING-AND-AGG... | 7    | -0.444800 | -1.203356 | 0.240933  | 0.872798  | 1.000      |
| 665  | GOBP-CELLULAR-ION-HOMEOSTASIS                     | 14   | -0.353332 | -1.203588 | 0.213855  | 0.886603  | 1.000      |
| 666  | GOBP-TUBE-DEVELOPMENT                             | 18   | -0.323425 | -1.204573 | 0.223242  | 0.898713  | 1.000      |
| 667  | REACTOME-CA-DEPENDENT-EVENTS                      | 8    | -0.443835 | -1.208104 | 0.223684  | 0.902534  | 1.000      |
| 668  | REACTOME-CREB1-PHOSPHORYLATION-THROUGH-NMDA-RE... | 8    | -0.441865 | -1.213370 | 0.216285  | 0.901392  | 1.000      |
| 669  | REACTOME-MAPK-FAMILY-SIGNALING-CASCADES           | 12   | -0.368648 | -1.216308 | 0.221239  | 0.907398  | 1.000      |
| 670  | GOBP-RHYTHMIC-PROCESS                             | 15   | -0.352485 | -1.218955 | 0.182109  | 0.915032  | 1.000      |
| 671  | GOBP-MUSCLE-ADAPTATION                            | 5    | -0.530120 | -1.223430 | 0.199482  | 0.916755  | 1.000      |
| 672  | REACTOME-RHO-GTPASE-EFFECTORS                     | 9    | -0.427928 | -1.227901 | 0.188482  | 0.918985  | 1.000      |
| 673  | GOBP-POSITIVE-REGULATION-OF-CATALYTIC-ACTIVITY    | 29   | -0.300557 | -1.228735 | 0.189189  | 0.933457  | 1.000      |
| 674  | GOBP-REGULATION-OF-METAL-ION-TRANSPORT            | 6    | -0.487805 | -1.228846 | 0.219451  | 0.951338  | 1.000      |
| 675  | GOBP-COAGULATION                                  | 8    | -0.435935 | -1.230297 | 0.223404  | 0.964718  | 1.000      |
| 676  | REACTOME-SIGNALING-BY-RHO-GTPASES-MIRO-GTPASES... | 9    | -0.427928 | -1.231845 | 0.214076  | 0.979382  | 1.000      |
| 677  | REACTOME-CELL-CYCLE                               | 6    | -0.503087 | -1.235179 | 0.189744  | 0.987031  | 1.000      |
| 678  | GOBP-NEGATIVE-REGULATION-OF-MUSCLE-ADAPTATION     | 5    | -0.530120 | -1.249901 | 0.206235  | 0.954187  | 1.000      |
| 679  | GOBP-NEGATIVE-REGULATION-OF-DEVELOPMENTAL-PROCESS | 13   | -0.387444 | -1.255958 | 0.180124  | 0.951670  | 1.000      |
| 680  | REACTOME-TRAFFICKING-OF-GLUR2-CONTAINING-AMPA-... | 8    | -0.448863 | -1.261993 | 0.169863  | 0.950040  | 1.000      |
| 681  | REACTOME-TRAFFICKING-OF-AMPA-RECEPTORS            | 11   | -0.407090 | -1.273808 | 0.166227  | 0.930005  | 1.000      |
| 682  | GOBP-TISSUE-MORPHOGENESIS                         | 7    | -0.483438 | -1.276356 | 0.171795  | 0.941928  | 1.000      |
| 683  | GOBP-REGULATION-OF-NEUROTRANSMITTER-TRANSPORT     | 6    | -0.532052 | -1.285005 | 0.157754  | 0.932300  | 1.000      |
| 684  | GOBP-SKIN-DEVELOPMENT                             | 5    | -0.538375 | -1.285045 | 0.180412  | 0.954883  | 1.000      |
| 685  | GOBP-NEGATIVE-REGULATION-OF-CELL-DIFFERENTIATION  | 13   | -0.387444 | -1.291267 | 0.178082  | 0.955441  | 1.000      |

Continuation of Table S8

| NAME                                                   | ID            | SIZE | ES        | NES       | NOM.p.val | FDR.q.val | FWER.p.val |
|--------------------------------------------------------|---------------|------|-----------|-----------|-----------|-----------|------------|
| 686 REACTOME_PROTEIN_PROTEIN_INTERACTIONS.AT_SYNAPSES  | R-RNO-6794362 | 12   | -0.401472 | -1.294725 | 0.150142  | 0.965416  | 1.000      |
| 687 REACTOME_RAS_ACTIVATION.UPON_CA2_INFLUX_THROUGH... | R-HSA-442982  | 6    | -0.524390 | -1.296099 | 0.176623  | 0.986077  | 1.000      |
| 688 GOBP_VASCULATURE_DEVELOPMENT                       | GO-0001944    | 17   | -0.347857 | -1.301902 | 0.142395  | 0.989233  | 1.000      |
| 689 GOBP_REGULATION_OF_NEUROTRANSMITTER_LEVELS         | GO-0001505    | 7    | -0.500127 | -1.309387 | 0.145553  | 0.988354  | 1.000      |
| 690 GOBP_RESPONSE_TO_TEMPERATURE_STIMULUS              | GO-0009266    | 9    | -0.453829 | -1.309628 | 0.125000  | 1.000000  | 1.000      |
| 691 GOBP_MYOTUBE_DIFFERENTIATION                       | GO-0014902    | 5    | -0.561243 | -1.323961 | 0.145320  | 0.988590  | 1.000      |
| 692 GOBP_CELLULAR_HOMEOSTASIS                          | GO-0019725    | 18   | -0.362388 | -1.325645 | 0.116208  | 1.000000  | 1.000      |
| 693 REACTOME_TRANSMISSION_ACROSS_CHEMICAL_SYNAPSES     | R-RNO-112315  | 23   | -0.342572 | -1.338900 | 0.106628  | 0.991694  | 1.000      |
| 694 GOBP_POSITIVE_REGULATION_OF_EPITHELIAL_CELL_PR...  | GO-0050679    | 7    | -0.509509 | -1.340526 | 0.131054  | 1.000000  | 1.000      |
| 695 GOBP_ORGANIC_ANION_TRANSPORT                       | GO-0015711    | 6    | -0.536585 | -1.346933 | 0.134434  | 1.000000  | 1.000      |
| 696 GOBP_POSITIVE_REGULATION_OF_NUCLEOBASE_CONTAIN...  | GO-0045935    | 28   | -0.331436 | -1.352039 | 0.095082  | 1.000000  | 1.000      |
| 697 REACTOME_BETA_CATENIN_INDEPENDENT_WNT_SIGNALING    | R-RNO-3858494 | 5    | -0.588614 | -1.352726 | 0.165816  | 1.000000  | 1.000      |
| 698 GOBP_POSITIVE_REGULATION_OF_ENDOTHELIAL_CELL_P...  | GO-0001938    | 6    | -0.539942 | -1.358840 | 0.118090  | 1.000000  | 1.000      |
| 699 GOBP_CARBOXYLIC_ACID_TRANSPORT                     | GO-0046942    | 6    | -0.536585 | -1.359162 | 0.121287  | 1.000000  | 1.000      |
| 700 GOBP_CALCIIUM_ION_TRANSPORT                        | GO-0006816    | 11   | -0.441558 | -1.361395 | 0.140162  | 1.000000  | 1.000      |
| 701 GOBP_NEUROTRANSMITTER_TRANSPORT                    | GO-0006836    | 7    | -0.500127 | -1.363157 | 0.118132  | 1.000000  | 1.000      |
| 702 GOBP_AMINO_ACID_TRANSPORT                          | GO-0006865    | 6    | -0.536585 | -1.369402 | 0.116580  | 1.000000  | 1.000      |
| 703 GOBP_METAL_ION_TRANSPORT                           | GO-0030001    | 11   | -0.441558 | -1.370622 | 0.123494  | 1.000000  | 1.000      |
| 704 GOBP_SPROUTING_ANGIOGENESIS                        | GO-0002040    | 5    | -0.593774 | -1.381245 | 0.105911  | 1.000000  | 1.000      |
| 705 GOBP_PLATELET_ACTIVATION                           | GO-0030168    | 6    | -0.561841 | -1.399578 | 0.101604  | 1.000000  | 1.000      |
| 706 GOBP_REGULATION_OF_MUSCLE_SYSTEM_PROCESS           | GO-0090257    | 8    | -0.487500 | -1.399604 | 0.090659  | 1.000000  | 1.000      |
| 707 GOBP_CHROMOSOME_ORGANIZATION                       | GO-0051276    | 6    | -0.565826 | -1.412235 | 0.100756  | 1.000000  | 1.000      |
| 708 GOBP_TAXIS                                         | GO-0042330    | 14   | -0.427532 | -1.434595 | 0.092308  | 1.000000  | 1.000      |
| 709 GOBP_NEURON_PROJECTION_GUIDANCE                    | GO-0097485    | 9    | -0.498428 | -1.448268 | 0.093093  | 1.000000  | 1.000      |
| 710 GOBP_MUSCLE_SYSTEM_PROCESS                         | GO-0003012    | 9    | -0.493671 | -1.448345 | 0.086592  | 1.000000  | 1.000      |
| 711 GOBP_ENDOTHELIAL_CELL_PROLIFERATION                | GO-0001935    | 8    | -0.520087 | -1.450953 | 0.087324  | 1.000000  | 1.000      |
| 712 REACTOME_G_ALPHA_Q_SIGNALING_EVENTS                | R-RNO-416476  | 6    | -0.575778 | -1.452381 | 0.097884  | 1.000000  | 1.000      |
| 713 GOBP_EPITHELIAL_CELL_PROLIFERATION                 | GO-0050673    | 12   | -0.447118 | -1.456253 | 0.078550  | 1.000000  | 1.000      |
| 714 REACTOME_NEURONAL_SYSTEM                           | R-RNO-112316  | 26   | -0.372852 | -1.458926 | 0.032468  | 1.000000  | 1.000      |
| 715 GOBP_MULTICELLULAR_ORGANISMAL_RESPONSE_TO_STRESS   | GO-0033555    | 5    | -0.629350 | -1.469535 | 0.096774  | 1.000000  | 1.000      |
| 716 REACTOME_NEUREXINS_AND_NEUROLIGINS                 | R-RNO-6794361 | 9    | -0.525013 | -1.471839 | 0.086826  | 1.000000  | 1.000      |
| 717 GOBP_DICARBOXYLIC_ACID_TRANSPORT                   | GO-0006835    | 5    | -0.650602 | -1.490914 | 0.078385  | 1.000000  | 1.000      |
| 718 GOBP_REGULATION_OF_PROTEIN_TYROSINE_KINASE_ACT...  | GO-0061097    | 5    | -0.664016 | -1.512291 | 0.083933  | 1.000000  | 1.000      |
| 719 GOBP_MONOCARBOXYLIC_ACID_TRANSPORT                 | GO-0015718    | 5    | -0.650602 | -1.521315 | 0.062331  | 1.000000  | 1.000      |
| 720 GOBP_ACIDIC_AMINO_ACID_TRANSPORT                   | GO-0015800    | 5    | -0.650602 | -1.528778 | 0.069767  | 1.000000  | 1.000      |
| 721 GOBP_POSITIVE_REGULATION_OF_PROTEIN_TYROSINE_K...  | GO-0061098    | 5    | -0.664016 | -1.528883 | 0.058081  | 1.000000  | 1.000      |
| 722 GOBP_EMBRYONIC_MORPHOGENESIS                       | GO-0048598    | 6    | -0.651750 | -1.588475 | 0.056266  | 1.000000  | 1.000      |
| 723 GOBP_LIPID_EXPORT_FROM_CELL                        | GO-0140353    | 5    | -0.732434 | -1.707909 | 0.036765  | 1.000000  | 0.998      |
| 724 GOBP_ANATOMICAL_STRUCTURE_FORMATION_INVOLVED_I...  | GO-0048646    | 20   | -0.483673 | -1.861030 | 0.010000  | 1.000000  | 0.903      |

End of Table

Supplementary Table S9: SC cervical segment early profile (8 DPL peak) GSEA results.

| Begin of Table S9 |                                                     |               |      |          |          |           |           |            |  |
|-------------------|-----------------------------------------------------|---------------|------|----------|----------|-----------|-----------|------------|--|
|                   | NAME                                                | ID            | SIZE | ES       | NES      | NOM.p.val | FDR.q.val | FWER.p.val |  |
| 0                 | REACTOME_INTERLEUKIN_4_AND_INTERLEUKIN_13_SIGNALING | R-RNO-6785807 | 8    | 0.767776 | 1.928067 | 0.003279  | 1.000000  | 0.626      |  |
| 1                 | GOBP_REGULATION_OF_DEFENSE_RESPONSE                 | GO-0031347    | 7    | 0.708593 | 1.789521 | 0.019830  | 1.000000  | 0.951      |  |
| 2                 | GOBP_EPITHELIAL_CELL_DIFFERENTIATION                | GO-0030855    | 7    | 0.692776 | 1.758604 | 0.021538  | 1.000000  | 0.981      |  |
| 3                 | GOBP_MULTICELLULAR_ORGANISM_PROCESS                 | GO-0044706    | 8    | 0.663654 | 1.750552 | 0.018576  | 1.000000  | 0.982      |  |
| 4                 | GOBP_REGULATION_OF_INFLAMMATORY_RESPONSE            | GO-0050727    | 7    | 0.708593 | 1.685824 | 0.036810  | 1.000000  | 0.997      |  |
| 5                 | GOBP_INFLAMMATORY_RESPONSE                          | GO-0006954    | 12   | 0.558444 | 1.672846 | 0.010345  | 1.000000  | 0.999      |  |
| 6                 | GOBP_OSTEOCLAST_DIFFERENTIATION                     | GO-0030316    | 6    | 0.731707 | 1.671057 | 0.022727  | 1.000000  | 0.999      |  |
| 7                 | GOBP_GENERATION_OF_PRECURSOR_METABOLITES_AND_E...   | GO-0006091    | 5    | 0.750803 | 1.661808 | 0.041436  | 1.000000  | 0.999      |  |
| 8                 | GOBP_POLYSACCHARIDE_METABOLIC_PROCESS               | GO-0005976    | 5    | 0.750910 | 1.635348 | 0.038567  | 1.000000  | 0.999      |  |
| 9                 | REACTOME_SIGNALING_BY_INTERLEUKINS                  | R-RNO-449147  | 15   | 0.484726 | 1.621109 | 0.022059  | 1.000000  | 1.000      |  |
| 10                | GOBP_REGULATION_OF_OSTEOCLAST_DIFFERENTIATION       | GO-0045670    | 5    | 0.722892 | 1.596826 | 0.057065  | 1.000000  | 1.000      |  |
| 11                | GOBP_OSTEOBLAST_DIFFERENTIATION                     | GO-0001649    | 5    | 0.734940 | 1.596129 | 0.056497  | 0.985193  | 1.000      |  |
| 12                | GOBP_EXTRINSIC_APOPTOTIC_SIGNALING_PATHWAY          | GO-0097191    | 7    | 0.634945 | 1.590985 | 0.047059  | 0.933322  | 1.000      |  |
| 13                | GOBP_CYTOKINE_MEDIATED_SIGNALING_PATHWAY            | GO-0019221    | 16   | 0.465831 | 1.569645 | 0.053232  | 0.960134  | 1.000      |  |
| 14                | GOBP_OSSIFICATION                                   | GO-0001503    | 9    | 0.559035 | 1.526269 | 0.053628  | 1.000000  | 1.000      |  |
| 15                | GOBP_NEGATIVE_REGULATION_OF_PEPTIDASE_ACTIVITY      | GO-0010466    | 6    | 0.653057 | 1.510690 | 0.076487  | 1.000000  | 1.000      |  |
| 16                | GOBP_REGULATION_OF_PROTEIN_LOCALIZATION_TO_CEL...   | GO-1904375    | 6    | 0.628164 | 1.497259 | 0.087324  | 1.000000  | 1.000      |  |
| 17                | GOBP_RESPONSE_TO_MECHANICAL_STIMULUS                | GO-0009612    | 6    | 0.616665 | 1.495942 | 0.086455  | 1.000000  | 1.000      |  |
| 18                | GOBP_RESPONSE_TO_NUTRIENT                           | GO-0007584    | 5    | 0.667798 | 1.480369 | 0.120000  | 1.000000  | 1.000      |  |
| 19                | GOBP_RAS_PROTEIN_SIGNAL_TRANSDUCTION                | GO-0007265    | 5    | 0.674900 | 1.465923 | 0.115068  | 1.000000  | 1.000      |  |
| 20                | GOBP_POSITIVE_REGULATION_OF_DEFENSE_RESPONSE        | GO-0031349    | 5    | 0.658415 | 1.462696 | 0.089337  | 1.000000  | 1.000      |  |
| 21                | GOBP_POSITIVE_REGULATION_OF_CELL_GROWTH             | GO-0030307    | 6    | 0.605973 | 1.452327 | 0.090643  | 1.000000  | 1.000      |  |
| 22                | GOBP_IN_UTERO_EMBRYONIC_DEVELOPMENT                 | GO-0001701    | 8    | 0.536433 | 1.440167 | 0.087948  | 1.000000  | 1.000      |  |
| 23                | GOBP_REPRODUCTION                                   | GO-0000003    | 18   | 0.405538 | 1.409598 | 0.092105  | 1.000000  | 1.000      |  |
| 24                | GOBP_REGULATION_OF_BINDING                          | GO-0051098    | 11   | 0.484832 | 1.393095 | 0.097902  | 1.000000  | 1.000      |  |
| 25                | GOBP_PEPTIDE_METABOLIC_PROCESS                      | GO-0006518    | 11   | 0.475329 | 1.390729 | 0.082508  | 1.000000  | 1.000      |  |
| 26                | GOBP_LONG_TERM_SYNAPTIC_DEPRESSION                  | GO-0060292    | 5    | 0.632276 | 1.390187 | 0.139276  | 1.000000  | 1.000      |  |
| 27                | REACTOME_SIGNALING_BY_RECEPTOR_TYROSINE_KINASES     | R-RNO-9006934 | 26   | 0.367065 | 1.378060 | 0.057692  | 1.000000  | 1.000      |  |
| 28                | GOBP_RESPONSE_TO_CYTOKINE                           | GO-0034097    | 23   | 0.372673 | 1.377423 | 0.069565  | 1.000000  | 1.000      |  |
| 29                | GOBP_SMALL_GTPASE_MEDIATED_SIGNAL_TRANSDUCTION      | GO-0007264    | 8    | 0.519251 | 1.348391 | 0.108696  | 1.000000  | 1.000      |  |
| 30                | GOBP_DEVELOPMENTAL_CELL_GROWTH                      | GO-0048588    | 5    | 0.619809 | 1.346352 | 0.156069  | 1.000000  | 1.000      |  |
| 31                | GOBP_REGULATION_OF_CARBOHYDRATE_BIOSYNTHETIC_P...   | GO-0043255    | 5    | 0.594394 | 1.328837 | 0.168022  | 1.000000  | 1.000      |  |
| 32                | GOBP_GLUCOSE_METABOLIC_PROCESS                      | GO-0006006    | 6    | 0.548583 | 1.312218 | 0.157738  | 1.000000  | 1.000      |  |
| 33                | GOBP_CARBOHYDRATE_BIOSYNTHETIC_PROCESS              | GO-0016051    | 5    | 0.594394 | 1.308581 | 0.200000  | 1.000000  | 1.000      |  |
| 34                | GOBP_POSITIVE_REGULATION_OF_SMOOTH_MUSCLE_CELL...   | GO-0048661    | 5    | 0.593711 | 1.304581 | 0.167614  | 1.000000  | 1.000      |  |
| 35                | GOBP_POSITIVE_REGULATION_OF_TRANSMEMBRANE_TRAN...   | GO-0034764    | 7    | 0.513621 | 1.298830 | 0.136232  | 1.000000  | 1.000      |  |
| 36                | GOBP_MULTIORGANISM_PROCESS                          | GO-0051704    | 16   | 0.385276 | 1.296868 | 0.107807  | 1.000000  | 1.000      |  |
| 37                | GOBP_CARBOHYDRATE_METABOLIC_PROCESS                 | GO-0005975    | 9    | 0.477514 | 1.294860 | 0.157556  | 1.000000  | 1.000      |  |
| 38                | REACTOME_DEATH_RECEPTOR_SIGNALING                   | R-RNO-73887   | 5    | 0.592523 | 1.286264 | 0.195402  | 1.000000  | 1.000      |  |
| 39                | GOBP_CELLULAR_AMIDE_METABOLIC_PROCESS               | GO-0043603    | 12   | 0.420567 | 1.286013 | 0.150538  | 1.000000  | 1.000      |  |
| 40                | GOBP_REGULATION_OF_EXTRINSIC_APOPTOTIC_SIGNAL...    | GO-2001236    | 6    | 0.544395 | 1.283536 | 0.178470  | 1.000000  | 1.000      |  |

Continuation of Table S9

| NAME | ID                                                | SIZE | ES       | NES      | NOM.p.val | FDR.q.val | FWER.p.val |
|------|---------------------------------------------------|------|----------|----------|-----------|-----------|------------|
| 41   | GOBP-REGULATION-OF-CARBOHYDRATE-METABOLIC-PROCESS | 5    | 0.594394 | 1.282522 | 0.172414  | 1.000000  | 1.000      |
| 42   | GOBP-MONOSACCHARIDE-METABOLIC-PROCESS             | 6    | 0.548583 | 1.282405 | 0.163793  | 1.000000  | 1.000      |
| 43   | GOBP-POSITIVE-REGULATION-OF-GROWTH                | 9    | 0.464107 | 1.278091 | 0.174757  | 0.998510  | 1.000      |
| 44   | GOBP-POSITIVE-REGULATION-OF-CELL-CELL-ADHESION    | 5    | 0.575633 | 1.276241 | 0.186667  | 0.983010  | 1.000      |
| 45   | GOBP-NEGATIVE-REGULATION-OF-BINDING               | 6    | 0.546279 | 1.275935 | 0.173789  | 0.962643  | 1.000      |
| 46   | GOBP-POSITIVE-REGULATION-OF-CYTOKINE-PRODUCTION   | 7    | 0.532139 | 1.271587 | 0.180473  | 0.956415  | 1.000      |
| 47   | REACTOME_POST_TRANSLATIONAL-PROTEIN-MODIFICATION  | 7    | 0.509963 | 1.270654 | 0.176966  | 0.939635  | 1.000      |
| 48   | REACTOME_TRANSCRIPTIONAL-REGULATION-OF-WHITE-A... | 6    | 0.547506 | 1.267404 | 0.187683  | 0.931890  | 1.000      |
| 49   | HALLMARK-KRAS-SIGNALING-UP                        | 6    | 0.536219 | 1.262271 | 0.191950  | 0.930447  | 1.000      |
| 50   | GOBP-MEMBRANE-PROTEIN-PROTEOLYSIS                 | 6    | 0.534891 | 1.254472 | 0.221212  | 0.937499  | 1.000      |
| 51   | GOBP-REGULATION-OF-CELLULAR-COMPONENT-SIZE        | 7    | 0.502345 | 1.252849 | 0.183544  | 0.925194  | 1.000      |
| 52   | GOBP-PATTERN-SPECIFICATION-PROCESS                | 6    | 0.534629 | 1.242617 | 0.205797  | 0.941839  | 1.000      |
| 53   | GOBP-REGIONALIZATION                              | 6    | 0.534629 | 1.238482 | 0.183381  | 0.936612  | 1.000      |
| 54   | GOBP-PROTEOLYSIS                                  | 17   | 0.368615 | 1.236575 | 0.175781  | 0.925322  | 1.000      |
| 55   | REACTOME_NGF-STIMULATED-TRANSCRIPTION             | 9    | 0.441279 | 1.236553 | 0.196078  | 0.908865  | 1.000      |
| 56   | GOBP-POSITIVE-REGULATION-OF-LEUKOCYTE-CELL-CEL... | 5    | 0.575633 | 1.234217 | 0.223757  | 0.900205  | 1.000      |
| 57   | GOBP-NEGATIVE-REGULATION-OF-CYSTEINE-TYPE-ENDO... | 5    | 0.573224 | 1.229107 | 0.228986  | 0.900715  | 1.000      |
| 58   | GOBP-DEFENSE-RESPONSE                             | 19   | 0.361430 | 1.224563 | 0.155462  | 0.898626  | 1.000      |
| 59   | HALLMARK-P13K-AKT-MTOR-SIGNALING                  | 6    | 0.523310 | 1.214547 | 0.253687  | 0.914960  | 1.000      |
| 60   | GOBP-TEMPERATURE-HOMEOSTASIS                      | 21   | 0.564242 | 1.214039 | 0.221607  | 0.901204  | 1.000      |
| 61   | REACTOME-CYTOKINE-SIGNALING-IN-IMMUNE-SYSTEM      | 5    | 0.356403 | 1.212873 | 0.199095  | 0.890125  | 1.000      |
| 62   | GOBP-NEGATIVE-REGULATION-OF-MOLECULAR-FUNCTION    | 24   | 0.324624 | 1.206548 | 0.182266  | 0.894735  | 1.000      |
| 63   | GOBP-NEGATIVE-REGULATION-OF-PROTEOLYSIS           | 8    | 0.464175 | 1.204284 | 0.236760  | 0.888220  | 1.000      |
| 64   | GOBP-REGULATION-OF-PROTEIN-LOCALIZATION-TO-MEM... | 7    | 0.487920 | 1.202228 | 0.240356  | 0.881018  | 1.000      |
| 65   | GOBP-RESPONSE-TO-CADMIUM-ION                      | 6    | 0.520517 | 1.202068 | 0.236025  | 0.868127  | 1.000      |
| 66   | GOBP-REGULATION-OF-PROTEIN-BINDING                | 7    | 0.479152 | 1.201862 | 0.216463  | 0.855745  | 1.000      |
| 67   | GOBP-LEUKOCYTE-CELL-CELL-ADHESION                 | 6    | 0.507905 | 1.201333 | 0.230114  | 0.844824  | 1.000      |
| 68   | GOBP-REGULATION-OF-CELL-DIFFERENTIATION           | 36   | 0.290006 | 1.179317 | 0.181347  | 0.900187  | 1.000      |
| 69   | GOBP-CELLULAR-COMPONENT-DISASSEMBLY               | 6    | 0.498423 | 1.172343 | 0.259036  | 0.910011  | 1.000      |
| 70   | GOBP-POSITIVE-REGULATION-OF-GENE-EXPRESSION       | 16   | 0.360265 | 1.169380 | 0.214022  | 0.906714  | 1.000      |
| 71   | GOBP-RESPONSE-TO-LIGHT-STIMULUS                   | 11   | 0.394086 | 1.163322 | 0.234043  | 0.897225  | 1.000      |
| 72   | GOBP-CELLULAR-CARBOHYDRATE-METABOLIC-PROCESS      | 5    | 0.523302 | 1.159699 | 0.262599  | 0.911457  | 1.000      |
| 73   | GOBP-REGULATION-OF-DEVELOPMENTAL-GROWTH           | 9    | 0.423354 | 1.150867 | 0.235880  | 0.907692  | 1.000      |
| 74   | GOBP-EMBRYONIC-ORGAN-DEVELOPMENT                  | 7    | 0.458922 | 1.153741 | 0.265244  | 0.904990  | 1.000      |
| 75   | GOBP-POSITIVE-REGULATION-OF-DEVELOPMENTAL-GROWTH  | 8    | 0.439802 | 1.146351 | 0.248322  | 0.915290  | 1.000      |
| 76   | REACTOME-ESTROGEN-DEPENDENT-NUCLEAR-EVENTS-DOW... | 5    | 0.514740 | 1.139324 | 0.267516  | 0.923706  | 1.000      |
| 77   | GOBP-POSITIVE-REGULATION-OF-IMMUNE-SYSTEM-PROCESS | 18   | 0.330097 | 1.128884 | 0.273092  | 0.945679  | 1.000      |
| 78   | GOBP-NEGATIVE-REGULATION-OF-SYNAPTIC-TRANSMISSION | 6    | 0.463415 | 1.121776 | 0.262346  | 0.956663  | 1.000      |
| 79   | GOBP-RESPONSE-TO-RADIATION                        | 13   | 0.348463 | 1.120541 | 0.270073  | 0.948973  | 1.000      |
| 80   | REACTOME-EXTRA-NUCLEAR-ESTROGEN-SIGNALING         | 7    | 0.444811 | 1.118851 | 0.352201  | 0.942883  | 1.000      |
| 81   | GOBP-POSITIVE-REGULATION-OF-CELL-DIFFERENTIATION  | 27   | 0.296063 | 1.116553 | 0.288991  | 0.938608  | 1.000      |
| 82   | GOBP-INOSITOL-LIPID-MEDIATED-SIGNALING            | 8    | 0.415065 | 1.114769 | 0.303797  | 0.932846  | 1.000      |
| 83   | GOBP-REGULATION-OF-NEURON-PROJECTION-DEVELOPMENT  | 16   | 0.341137 | 1.110784 | 0.298387  | 0.933959  | 1.000      |

Continuation of Table S9

| NAME | ID                                                  | SIZE | ES       | NES      | NOM.p.val | FDR.q.val | FWER.p.val |
|------|-----------------------------------------------------|------|----------|----------|-----------|-----------|------------|
| 84   | GOBP-ORGAN_GROWTH                                   | 5    | 0.500075 | 1.109664 | 0.287293  | 0.926466  | 1.000      |
| 85   | GOBP-REGULATION_OF_CELL_DEVELOPMENT                 | 15   | 0.351812 | 1.108910 | 0.319703  | 0.917965  | 1.000      |
| 86   | GOBP-AMYLOID-PRECURSOR_PROTEIN_CATABOLIC_PROCESS    | 5    | 0.504594 | 1.107742 | 0.310924  | 0.910976  | 1.000      |
| 87   | GOBP-AMYLOID-BETA-METABOLIC_PROCESS                 | 5    | 0.504594 | 1.098848 | 0.321127  | 0.927831  | 1.000      |
| 88   | HALLMARK-APOPTOSIS                                  | 6    | 0.470030 | 1.097675 | 0.275964  | 0.920801  | 1.000      |
| 89   | GOBP-NEGATIVE-REGULATION_OF-PROTEIN-METABOLIC-...   | 20   | 0.309291 | 1.092760 | 0.296943  | 0.925408  | 1.000      |
| 90   | GOBP-AMYLOID-PRECURSOR_PROTEIN-METABOLIC_PROCESS    | 5    | 0.504594 | 1.091440 | 0.331288  | 0.919090  | 1.000      |
| 91   | GOBP-GLIAL-CELL-DIFFERENTIATION                     | 10   | 0.381631 | 1.088551 | 0.302181  | 0.918071  | 1.000      |
| 92   | GOBP-REGULATION_OF-NEURON-DIFFERENTIATION           | 5    | 0.502021 | 1.081772 | 0.339474  | 0.928593  | 1.000      |
| 93   | GOBP-ENZYME-LINKED-RECEPTOR_PROTEIN-SIGNALING-...   | 24   | 0.294322 | 1.079026 | 0.357143  | 0.927382  | 1.000      |
| 94   | GOBP-MATERNAL_PROCESS_INVOLVED_IN-FEMALE-PREGN...   | 5    | 0.493982 | 1.076724 | 0.324022  | 0.925090  | 1.000      |
| 95   | GOBP-POSITIVE-REGULATION_OF-BINDING                 | 6    | 0.462931 | 1.073787 | 0.355623  | 0.924552  | 1.000      |
| 96   | GOBP-REGULATION_OF-ORGAN_GROWTH                     | 5    | 0.500075 | 1.073762 | 0.345946  | 0.915146  | 1.000      |
| 97   | GOBP-GLIOGENESIS                                    | 12   | 0.355263 | 1.070045 | 0.318033  | 0.917070  | 1.000      |
| 98   | GOBP-MUSCLE-TISSUE-DEVELOPMENT                      | 11   | 0.355426 | 1.061522 | 0.385382  | 0.932426  | 1.000      |
| 99   | GOBP-RESPONSE-TO-NERVE-GROWTH-FACTOR                | 7    | 0.421744 | 1.057429 | 0.346749  | 0.935413  | 1.000      |
| 100  | GOBP-POSITIVE-REGULATION_OF_PRL-MIRNA-TRANSCRIPT... | 7    | 0.419753 | 1.052141 | 0.375723  | 0.942053  | 1.000      |
| 101  | GOBP-PROTEIN_KINASE-B-SIGNALING                     | 6    | 0.432191 | 1.049199 | 0.378698  | 0.941995  | 1.000      |
| 102  | GOBP-PRL-MIRNA-TRANSCRIPTION_BY-RNA-POLYMERASE-II   | 7    | 0.419753 | 1.042930 | 0.378698  | 0.952045  | 1.000      |
| 103  | GOBP-EMBRYO-DEVELOPMENT                             | 14   | 0.330697 | 1.041867 | 0.402135  | 0.946044  | 1.000      |
| 104  | GOBP-REGULATION_OF-NERVOUS-SYSTEM-DEVELOPMENT       | 15   | 0.322037 | 1.034656 | 0.389286  | 0.959105  | 1.000      |
| 105  | GOBP-EMBRYO-DEVELOPMENT-ENDING_IN-BIRTH-OR-EGG...   | 9    | 0.386860 | 1.031723 | 0.385135  | 0.958757  | 1.000      |
| 106  | GOBP-RESPONSE-TO-UV                                 | 5    | 0.484419 | 1.030987 | 0.395543  | 0.952226  | 1.000      |
| 107  | GOBP-DEVELOPMENTAL-PROCESS_INVOLVED_IN-REPRODU...   | 11   | 0.353857 | 1.027703 | 0.411765  | 0.953442  | 1.000      |
| 108  | GOBP-REGULATION_OF-ANION-TRANSMEMBRANE-TRANSPORT    | 5    | 0.464476 | 1.027488 | 0.372928  | 0.945357  | 1.000      |
| 109  | GOBP-POSTSYNAPSE-ORGANIZATION                       | 10   | 0.352042 | 1.027474 | 0.358108  | 0.936830  | 1.000      |
| 110  | GOBP-DENDRITIC-SPINE-MORPHOGENESIS                  | 5    | 0.460004 | 1.026925 | 0.381215  | 0.930023  | 1.000      |
| 111  | GOBP-FC-RECEPTOR-SIGNALING-PATHWAY                  | 8    | 0.383509 | 1.026480 | 0.410828  | 0.922961  | 1.000      |
| 112  | GOBP-MULTICELLULAR-ORGANISM-REPRODUCTION            | 12   | 0.345784 | 1.026158 | 0.390728  | 0.915632  | 1.000      |
| 113  | GOBP-MONOCARBOXYLIC-ACID-METABOLIC-PROCESS          | 6    | 0.430262 | 1.022932 | 0.389041  | 0.917172  | 1.000      |
| 114  | GOBP-TRANSMEMBRANE-RECEPTOR_PROTEIN-TYROSINE-K...   | 19   | 0.302160 | 1.021616 | 0.397541  | 0.913085  | 1.000      |
| 115  | GOBP-POSITIVE-REGULATION_OF-ION-TRANSPORT           | 17   | 0.303428 | 1.018016 | 0.430712  | 0.915224  | 1.000      |
| 116  | GOBP-REGULATION_OF-CELLULAR-AMIDE-METABOLIC-PR...   | 9    | 0.380688 | 1.012514 | 0.381579  | 0.923090  | 1.000      |
| 117  | GOBP-DENDRITIC-SPINE-DEVELOPMENT                    | 6    | 0.437552 | 1.012193 | 0.408669  | 0.916264  | 1.000      |
| 118  | GOBP-CELLULAR-RESPONSE-TO-CADMIUM-ION               | 5    | 0.458766 | 1.009430 | 0.397101  | 0.916537  | 1.000      |
| 119  | GOBP-NEGATIVE-REGULATION_OF-LOCOMOTION              | 5    | 0.468553 | 1.007406 | 0.399417  | 0.914625  | 1.000      |
| 120  | GOBP-NEGATIVE-REGULATION_OF-CELL-DEATH              | 22   | 0.279246 | 1.007133 | 0.452000  | 0.907908  | 1.000      |
| 121  | REACTOME-SIGNALING-BY-NTRKS                         | 18   | 0.300663 | 1.006880 | 0.429150  | 0.901166  | 1.000      |
| 122  | GOBP-REGULATION_OF-CELL_CYCLE_PROCESS               | 5    | 0.464060 | 1.005042 | 0.406162  | 0.898734  | 1.000      |
| 123  | GOBP-GLAND-DEVELOPMENT                              | 7    | 0.392263 | 1.004778 | 0.436047  | 0.892251  | 1.000      |
| 124  | GOBP-REGULATION_OF-POSTSYNAPSE-ORGANIZATION         | 6    | 0.414950 | 1.002934 | 0.426332  | 0.890159  | 1.000      |
| 125  | REACTOME-NUCLEAR-EVENTS-KINASE-AND-TRANSCRIPTI...   | 11   | 0.336360 | 1.000049 | 0.441472  | 0.891347  | 1.000      |
| 126  | GOBP-REGULATION_OF-CELL_CYCLE                       | 13   | 0.324016 | 0.998656 | 0.441860  | 0.887933  | 1.000      |



Continuation of Table S9

|     | NAME                                               | ID            | SIZE | ES       | NES      | NOM.p.val | FDR.q.val | FWER.p.val |
|-----|----------------------------------------------------|---------------|------|----------|----------|-----------|-----------|------------|
| 127 | GOBP-PERIPHERAL-NEUROUS-SYSTEM-DEVELOPMENT         | GO-0007422    | 9    | 0.369745 | 0.995337 | 0.450658  | 0.890587  | 1.000      |
| 128 | GOBP-APOPTOTIC-MITOCHONDRIAL-CHANGES               | GO-0008637    | 6    | 0.417116 | 0.995061 | 0.426791  | 0.884472  | 1.000      |
| 129 | GOBP-GAMETE-GENERATION                             | GO-0007276    | 9    | 0.353893 | 0.993465 | 0.457516  | 0.881802  | 1.000      |
| 130 | REACTOME-EXTRACELLULAR-MATRIX-ORGANIZATION         | R-RNO-1474244 | 5    | 0.449152 | 0.991652 | 0.428571  | 0.879964  | 1.000      |
| 131 | GOBP-IMMUNE-RESPONSE-REGULATING-SIGNALING-PATHWAY  | GO-000276     | 8    | 0.38509  | 0.989370 | 0.413907  | 0.879389  | 1.000      |
| 132 | GOBP-HEART-DEVELOPMENT                             | GO-0007507    | 6    | 0.427288 | 0.986574 | 0.427245  | 0.879705  | 1.000      |
| 133 | GOBP-REGULATION-OF-CELLULAR-CATABOLIC-PROCESS      | GO-0031329    | 10   | 0.340760 | 0.977764 | 0.454545  | 0.895431  | 1.000      |
| 134 | REACTOME-ESR-MEDIATED-SIGNALING                    | R-RNO-8939211 | 8    | 0.363962 | 0.977721 | 0.480519  | 0.888962  | 1.000      |
| 135 | GOBP-CELL-MIGRATION                                | GO-0016477    | 22   | 0.265978 | 0.976290 | 0.489362  | 0.886158  | 1.000      |
| 136 | GOBP-POSITIVE-REGULATION-OF-ANION-TRANSPORT        | GO-1903793    | 9    | 0.354083 | 0.972301 | 0.438775  | 0.890388  | 1.000      |
| 137 | GOBP-CARDIAC-MUSCLE-TISSUE-DEVELOPMENT             | GO-0048738    | 6    | 0.427288 | 0.972158 | 0.454810  | 0.884296  | 1.000      |
| 138 | REACTOME-SIGNALING-BY-NUCLEAR-RECEPTORS            | R-RNO-9006931 | 8    | 0.363962 | 0.970168 | 0.462025  | 0.883506  | 1.000      |
| 139 | GOBP-NEGATIVE-REGULATION-OF-RESPONSE-TO-EXTERN...  | GO-0032102    | 5    | 0.440093 | 0.966406 | 0.449315  | 0.886825  | 1.000      |
| 140 | GOBP-REGULATION-OF-GLIOGENESIS                     | GO-0014013    | 5    | 0.445783 | 0.965524 | 0.465116  | 0.882733  | 1.000      |
| 141 | GOBP-RESPONSE-TO-ENDOGENOUS-STIMULUS               | GO-0009719    | 34   | 0.248457 | 0.964608 | 0.550898  | 0.878647  | 1.000      |
| 142 | GOBP-POSITIVE-REGULATION-OF-GLIOGENESIS            | GO-0014015    | 5    | 0.445783 | 0.963776 | 0.469444  | 0.874774  | 1.000      |
| 143 | GOBP-NEGATIVE-REGULATION-OF-MULTICELLULAR-ORGA...  | GO-0051241    | 15   | 0.294671 | 0.962372 | 0.507634  | 0.872311  | 1.000      |
| 144 | GOBP-NEGATIVE-REGULATION-OF-CATALYTIC-ACTIVITY     | GO-0043086    | 17   | 0.277438 | 0.962310 | 0.500000  | 0.866442  | 1.000      |
| 145 | GOBP-DEVELOPMENTAL-GROWTH                          | GO-0048589    | 10   | 0.344285 | 0.959631 | 0.531987  | 0.867501  | 1.000      |
| 146 | GOBP-T-CELL-ACTIVATION                             | GO-0042110    | 8    | 0.374121 | 0.954632 | 0.495177  | 0.874260  | 1.000      |
| 147 | GOBP-REGULATION-OF-INTRACELLULAR-SIGNAL-TRANSD...  | GO-1902531    | 21   | 0.259226 | 0.943041 | 0.545852  | 0.896659  | 1.000      |
| 148 | GOBP-NEGATIVE-REGULATION-OF-HYDROLASE-ACTIVITY     | GO-0051346    | 11   | 0.318842 | 0.942035 | 0.526132  | 0.893067  | 1.000      |
| 149 | GOBP-REGULATION-OF-CELL-SIZE                       | GO-0008361    | 5    | 0.440325 | 0.941803 | 0.492997  | 0.887749  | 1.000      |
| 150 | GOBP-CARBOHYDRATE-DERIVATIVE-METABOLIC-PROCESS     | GO-1901135    | 8    | 0.350714 | 0.931347 | 0.542587  | 0.909191  | 1.000      |
| 151 | GOBP-REGULATION-OF-MULTICELLULAR-ORGANISMAL-DE...  | GO-2000026    | 31   | 0.230075 | 0.922797 | 0.567416  | 0.925144  | 1.000      |
| 152 | GOBP-RESPONSE-TO-NICOTINE                          | GO-0035094    | 7    | 0.370643 | 0.909068 | 0.545181  | 0.954898  | 1.000      |
| 153 | GOBP-IMPORT-INTO-CELL                              | GO-0098657    | 6    | 0.379374 | 0.907303 | 0.532213  | 0.953187  | 1.000      |
| 154 | GOBP-LOCOMOTION                                    | GO-0040011    | 31   | 0.236258 | 0.906797 | 0.594872  | 0.948163  | 1.000      |
| 155 | GOBP-ENDOCRINE-SYSTEM-DEVELOPMENT                  | GO-0035270    | 6    | 0.388898 | 0.902097 | 0.579288  | 0.954758  | 1.000      |
| 156 | REACTOME-TOLL-LIKE-RECEPTOR-9-TLR9-CASCADE         | R-RNO-168138  | 8    | 0.337500 | 0.896703 | 0.549689  | 0.962957  | 1.000      |
| 157 | GOBP-POSITIVE-REGULATION-OF-INTRACELLULAR-SIGN...  | GO-1902533    | 14   | 0.277580 | 0.891259 | 0.595420  | 0.970657  | 1.000      |
| 158 | GOBP-POSITIVE-REGULATION-OF-NEUROUS-SYSTEM-DEV...  | GO-0051962    | 12   | 0.291392 | 0.888685 | 0.615385  | 0.970968  | 1.000      |
| 159 | GOBP-REGULATION-OF-LONG-TERM-SYNAPTIC-POTENTIAL... | GO-1900271    | 6    | 0.395831 | 0.887837 | 0.569697  | 0.967162  | 1.000      |
| 160 | GOBP-POSITIVE-REGULATION-OF-CELL-DEVELOPMENT       | GO-0010720    | 12   | 0.291392 | 0.887195 | 0.577358  | 0.962792  | 1.000      |
| 161 | GOBP-MORPHOGENESIS-OF-AN-EPITHELIUM                | GO-0002009    | 6    | 0.377364 | 0.885672 | 0.546828  | 0.960547  | 1.000      |
| 162 | GOBP-REGULATION-OF-CELL-DEATH                      | GO-0010941    | 34   | 0.218658 | 0.885106 | 0.702857  | 0.956140  | 1.000      |
| 163 | GOBP-CELL-CYCLE                                    | GO-0007049    | 21   | 0.240702 | 0.876333 | 0.660944  | 0.972277  | 1.000      |
| 164 | REACTOME-TOLL-LIKE-RECEPTOR-TLR1-TLR2-CASCADE      | R-RNO-168179  | 8    | 0.337500 | 0.876317 | 0.604317  | 0.966671  | 1.000      |
| 165 | REACTOME-TOLL-LIKE-RECEPTOR-CASCADES               | R-RNO-168898  | 8    | 0.337500 | 0.874003 | 0.595469  | 0.966368  | 1.000      |
| 166 | GOBP-ACTIVATION-OF-PROTEIN-KINASE-ACTIVITY         | GO-0032147    | 10   | 0.302661 | 0.866458 | 0.660131  | 0.979557  | 1.000      |
| 167 | GOBP-POSITIVE-REGULATION-OF-DEVELOPMENTAL-PROCESS  | GO-0051094    | 32   | 0.219987 | 0.866439 | 0.677596  | 0.973791  | 1.000      |
| 168 | GOBP-EPITHELIUM-DEVELOPMENT                        | GO-0060429    | 15   | 0.268780 | 0.864150 | 0.656604  | 0.973216  | 1.000      |
| 169 | REACTOME-MYD88-INDEPENDENT-TLR4-CASCADE            | R-RNO-166166  | 8    | 0.337500 | 0.860872 | 0.634375  | 0.975466  | 1.000      |

Continuation of Table S9

| NAME                                                  | ID            | SIZE | ES       | NES      | NOM.p.val | FDR.q.val | FWER.p.val |
|-------------------------------------------------------|---------------|------|----------|----------|-----------|-----------|------------|
| 170 HALLMARK-UV-RESPONSE-UP                           | M5941         | 5    | 0.380834 | 0.857676 | 0.581538  | 0.977320  | 1.000      |
| 171 GOBP-REGULATION-OF-FAT-CELL-DIFFERENTIATION       | GO-0045598    | 6    | 0.360765 | 0.857424 | 0.622590  | 0.972265  | 1.000      |
| 172 GOBP-POSITIVE-REGULATION-OF-NEUROGENESIS          | GO-0050769    | 12   | 0.291392 | 0.857152 | 0.657895  | 0.967351  | 1.000      |
| 173 GOBP-REGULATION-OF-PEPTIDASE-ACTIVITY             | GO-0052547    | 10   | 0.300129 | 0.856048 | 0.635783  | 0.964313  | 1.000      |
| 174 GOBP-REGULATION-OF-PROTEIN-LOCALIZATION           | GO-0032880    | 18   | 0.241293 | 0.854419 | 0.687243  | 0.962496  | 1.000      |
| 175 GOBP-RESPONSE-TO-ACID-CHEMICAL                    | GO-0001101    | 6    | 0.353659 | 0.853122 | 0.615152  | 0.959845  | 1.000      |
| 176 GOBP-SMOOTH-MUSCLE-CELL-PROLIFERATION             | GO-0048659    | 6    | 0.361882 | 0.849872 | 0.628895  | 0.962135  | 1.000      |
| 177 GOBP-CELL-GROWTH                                  | GO-0016049    | 10   | 0.304418 | 0.844790 | 0.655063  | 0.968732  | 1.000      |
| 178 REACTOME-TRANSCRIPTIONAL-REGULATION-BY-TP53       | R-RNO-3700989 | 6    | 0.362333 | 0.839633 | 0.634730  | 0.976080  | 1.000      |
| 179 GOBP-MUSCLE-ORGAN-DEVELOPMENT                     | GO-0007517    | 9    | 0.321487 | 0.837925 | 0.656463  | 0.974391  | 1.000      |
| 180 GOBP-REGULATION-OF-CELLULAR-PROTEIN-LOCALIZATION  | GO-1903827    | 12   | 0.274621 | 0.835583 | 0.685512  | 0.974267  | 1.000      |
| 181 REACTOME-SENESCENCE-ASSOCIATED-SECRETORY-PHENO... | R-RNO-2559582 | 6    | 0.353990 | 0.830590 | 0.671429  | 0.980248  | 1.000      |
| 182 GOBP-REGULATION-OF-IMMUNE-SYSTEM-PROCESS          | GO-0002682    | 21   | 0.236060 | 0.829946 | 0.733945  | 0.976614  | 1.000      |
| 183 GOBP-REGULATION-OF-NEUROGENESIS                   | GO-0050767    | 14   | 0.262496 | 0.828976 | 0.676976  | 0.973571  | 1.000      |
| 184 GOBP-AGING                                        | GO-0007568    | 13   | 0.273130 | 0.828297 | 0.746032  | 0.969825  | 1.000      |
| 185 GOBP-ANION-TRANSMEMBRANE-TRANSPORT                | GO-0098656    | 7    | 0.331314 | 0.827087 | 0.667598  | 0.967110  | 1.000      |
| 186 REACTOME-CELLULAR-SENESCENCE                      | R-RNO-2559583 | 6    | 0.353990 | 0.822443 | 0.696049  | 0.971927  | 1.000      |
| 187 GOBP-MUSCLE-CELL-DEVELOPMENT                      | GO-0055001    | 5    | 0.373862 | 0.818293 | 0.653959  | 0.976029  | 1.000      |
| 188 REACTOME-EPHLEPHRIN-SIGNALING                     | R-RNO-268233  | 6    | 0.344023 | 0.817183 | 0.664671  | 0.973255  | 1.000      |
| 189 GOBP-ACTIVATION-OF-IMMUNE-RESPONSE                | GO-0002253    | 5    | 0.385484 | 0.816883 | 0.676471  | 0.968796  | 1.000      |
| 190 GOBP-REGULATION-OF-SMALL-MOLECULE-METABOLIC-PR... | GO-0062012    | 9    | 0.308172 | 0.814057 | 0.694245  | 0.969794  | 1.000      |
| 191 GOBP-NEGATIVE-REGULATION-OF-CELL-DEVELOPMENT      | GO-0010721    | 6    | 0.343232 | 0.802302 | 0.676829  | 0.989877  | 1.000      |
| 192 GOBP-REGULATION-OF-PROTEIN-SERINE-THREONINE-KI... | GO-0071900    | 12   | 0.264284 | 0.798992 | 0.738182  | 0.991716  | 1.000      |
| 193 GOBP-LEUKOCYTE-MIGRATION                          | GO-0050900    | 6    | 0.334715 | 0.789060 | 0.725948  | 1.000000  | 1.000      |
| 194 GOBP-CELLULAR-RESPONSE-TO-ABIOTIC-STIMULUS        | GO-0071214    | 7    | 0.318873 | 0.785546 | 0.737374  | 1.000000  | 1.000      |
| 195 GOBP-MEMORY                                       | GO-0007613    | 13   | 0.256270 | 0.780718 | 0.776557  | 1.000000  | 1.000      |
| 196 GOBP-IMMUNE-EFFECTOR-PROCESS                      | GO-0002252    | 11   | 0.278438 | 0.780471 | 0.758278  | 1.000000  | 1.000      |
| 197 GOBP-RESPONSE-TO-CALCIUM-ION                      | GO-0051592    | 6    | 0.334890 | 0.778812 | 0.719547  | 1.000000  | 1.000      |
| 198 REACTOME-INTERLEUKIN-17-SIGNALING                 | R-RNO-448424  | 6    | 0.329268 | 0.778653 | 0.698225  | 1.000000  | 1.000      |
| 199 GOBP-CELL-CELL-JUNCTION-ORGANIZATION              | GO-0045216    | 6    | 0.339838 | 0.774717 | 0.742857  | 1.000000  | 1.000      |
| 200 GOBP-POSITIVE-REGULATION-OF-CELL-DEATH            | GO-0010942    | 19   | 0.225420 | 0.774498 | 0.814655  | 1.000000  | 1.000      |
| 201 GOBP-NEUTROPHIL-SIGNALING-PATHWAY                 | GO-0038179    | 6    | 0.322305 | 0.772804 | 0.743516  | 0.998424  | 1.000      |
| 202 GOBP-DENDRITE-MORPHOGENESIS                       | GO-0048813    | 7    | 0.306055 | 0.770433 | 0.765766  | 0.998015  | 1.000      |
| 203 GOBP-NEUTROPHIL-TRK-RECEPTOR-SIGNALING-PATHWAY    | GO-0048011    | 6    | 0.322305 | 0.769894 | 0.761147  | 0.994084  | 1.000      |
| 204 GOBP-POSITIVE-REGULATION-OF-ESTABLISHMENT-OF-P... | GO-1904951    | 5    | 0.352768 | 0.764867 | 0.713018  | 0.999094  | 1.000      |
| 205 GOBP-ACTIN-FILAMENT-BASED-PROCESS                 | GO-0030029    | 7    | 0.312456 | 0.760639 | 0.776025  | 1.000000  | 1.000      |
| 206 REACTOME-VESICLE-MEDIATED-TRANSPORT               | R-RNO-5653656 | 5    | 0.331088 | 0.758834 | 0.777473  | 1.000000  | 1.000      |
| 207 GOBP-RESPONSE-TO-OXIDATIVE-STRESS                 | GO-0006979    | 8    | 0.283711 | 0.757827 | 0.735385  | 0.997668  | 1.000      |
| 208 GOBP-REGULATION-OF-WNT-SIGNALING-PATHWAY          | GO-0030111    | 5    | 0.337349 | 0.757000 | 0.783562  | 0.994470  | 1.000      |
| 209 GOBP-REGULATION-OF-PROTEOLYSIS                    | GO-0030162    | 12   | 0.253610 | 0.756228 | 0.819549  | 0.991016  | 1.000      |
| 210 GOBP-RESPONSE-TO-METAL-ION                        | GO-0010038    | 15   | 0.231584 | 0.751587 | 0.836957  | 0.994957  | 1.000      |
| 211 GOBP-CELLULAR-RESPONSE-TO-EXTERNAL-STIMULUS       | GO-0071496    | 10   | 0.259668 | 0.749930 | 0.824324  | 0.992981  | 1.000      |
| 212 GOBP-RESPONSE-TO-NITROGEN-COMPOUND                | GO-1901698    | 35   | 0.186702 | 0.743503 | 0.901099  | 0.990646  | 1.000      |

Continuation of Table S9

| NAME | ID                                                               | SIZE | ES       | NES      | NOM.p.val | FDR.q.val | FWER.p.val |
|------|------------------------------------------------------------------|------|----------|----------|-----------|-----------|------------|
| 213  | GOBP-RESPONSE.TO.REACTIVE.OXYGEN.SPECIES                         | 8    | 0.282711 | 0.746249 | 0.809091  | 0.990023  | 1.000      |
| 214  | GOBP-CELL-POPULATION-PROLIFERATION                               | 32   | 0.196266 | 0.741401 | 0.896552  | 0.993756  | 1.000      |
| 215  | GOBP-POSITIVE-REGULATION-OF.MULTICELLULAR.ORGANIZATION           | 32   | 0.184770 | 0.737359 | 0.887097  | 0.996138  | 1.000      |
| 216  | GOBP-REGULATION-OF-IMMUNE-RESPONSE                               | 12   | 0.244894 | 0.735095 | 0.851852  | 0.995413  | 1.000      |
| 217  | GOBP-RESPONSE.TO.ABIOTIC.STIMULUS                                | 27   | 0.182928 | 0.731664 | 0.897297  | 0.996344  | 1.000      |
| 218  | GOBP-REGULATION-OF.LYMPHOCYTE-ACTIVATION                         | 5    | 0.343593 | 0.731175 | 0.790831  | 0.992473  | 1.000      |
| 219  | GOBP-REGULATION-OF.GROWTH                                        | 13   | 0.233882 | 0.728184 | 0.868526  | 0.992754  | 1.000      |
| 220  | REACTOME.MEMBRANE-TRAFFICKING                                    | 5    | 0.331088 | 0.726834 | 0.767313  | 0.990679  | 1.000      |
| 221  | REACTOME.PTEN-REGULATION                                         | 5    | 0.325301 | 0.724388 | 0.800539  | 0.990091  | 1.000      |
| 222  | GOBP-ERK1-AND-ERK2-CASCADE                                       | 5    | 0.323153 | 0.723091 | 0.831522  | 0.987811  | 1.000      |
| 223  | GOBP-REGULATION-OF.AXONOGENESIS                                  | 7    | 0.297853 | 0.719440 | 0.822430  | 0.989216  | 1.000      |
| 224  | GOBP-PROTEIN-LOCALIZATION.TO.PLASMA.MEMBRANE                     | 7    | 0.294941 | 0.718299 | 0.834375  | 0.986582  | 1.000      |
| 225  | GOBP-TISSUE.HOMEOSTASIS                                          | 5    | 0.318826 | 0.717484 | 0.819945  | 0.983445  | 1.000      |
| 226  | GOBP-REGULATION-OF.VASCULAR-ASSOCIATED.SMOOTH.MUSCLE-CONTRACTION | 5    | 0.315843 | 0.715058 | 0.824713  | 0.982620  | 1.000      |
| 227  | GOBP-NEURON-PROJECTION-ORGANIZATION                              | 8    | 0.271581 | 0.714967 | 0.846645  | 0.978442  | 1.000      |
| 228  | GOBP-CELLULAR-RESPONSE.TO.REACTIVE.OXYGEN.SPECIES                | 5    | 0.325301 | 0.713799 | 0.830946  | 0.975974  | 1.000      |
| 229  | GOBP-PEPTIDE.BIOSYNTHETIC.PROCESS                                | 6    | 0.293030 | 0.706216 | 0.842541  | 0.978914  | 1.000      |
| 230  | REACTOME.MAPK-TARGETS.NUCLEAR.EVENTS.MEDIATED...BY.STRESS        | 5    | 0.325301 | 0.705175 | 0.854795  | 0.976224  | 1.000      |
| 231  | GOBP-POSITIVE-REGULATION-OF-CELL-PROLIFERATION                   | 5    | 0.329056 | 0.698898 | 0.806630  | 0.980674  | 1.000      |
| 232  | GOBP-CELLULAR-RESPONSE.TO.CHEMICAL-STRESS                        | 7    | 0.271651 | 0.698791 | 0.864687  | 0.976715  | 1.000      |
| 233  | GOBP-LYMPHOCYTE-ACTIVATION                                       | 10   | 0.249493 | 0.697810 | 0.863192  | 0.969648  | 1.000      |
| 234  | GOBP-AMIDE.BIOSYNTHETIC.PROCESS                                  | 6    | 0.293030 | 0.696169 | 0.865103  | 0.967746  | 1.000      |
| 235  | GOBP-POSITIVE-REGULATION-OF-AXONOGENESIS                         | 5    | 0.311193 | 0.686564 | 0.882522  | 0.970091  | 1.000      |
| 236  | HALLMARK-TNFA-SIGNALING-VIA-NFkB                                 | 14   | 0.221946 | 0.683952 | 0.876471  | 0.971023  | 1.000      |
| 237  | GOBP-INTRINSIC-APOPTOTIC-SIGNALING-PATHWAY                       | 5    | 0.329056 | 0.682079 | 0.852410  | 0.961402  | 1.000      |
| 238  | GOBP-MYELOID-LEUKOCYTE-ACTIVATION                                | 8    | 0.263431 | 0.673795 | 0.901899  | 0.967876  | 1.000      |
| 239  | GOBP-MITOCHONDRION-ORGANIZATION                                  | 7    | 0.270158 | 0.673448 | 0.859238  | 0.964376  | 1.000      |
| 240  | REACTOME.DEVELOPMENTAL-BIOLOGY                                   | 22   | 0.182840 | 0.655850 | 0.972477  | 0.980329  | 1.000      |
| 241  | GOBP-REGULATION-OF-PROTEIN-STABILITY                             | 5    | 0.295000 | 0.652711 | 0.929203  | 0.979515  | 1.000      |
| 242  | GOBP-POSITIVE-REGULATION-OF-TRANSPORT                            | 26   | 0.173611 | 0.650317 | 0.945000  | 0.978124  | 1.000      |
| 243  | GOBP-SKELETAL-MUSCLE-ORGAN.DEVELOPMENT                           | 5    | 0.297959 | 0.640016 | 0.912698  | 0.983968  | 1.000      |
| 244  | GOBP-POSITIVE-REGULATION-OF-CELL-ADHESION                        | 7    | 0.261634 | 0.638870 | 0.921875  | 0.981153  | 1.000      |
| 245  | GOBP-NEGATIVE-REGULATION-OF-TRANSMEMBRANE-TRANSPORT              | 6    | 0.262972 | 0.632197 | 0.909366  | 0.983306  | 1.000      |
| 246  | GOBP-REGULATION-OF-LIPID-METABOLIC-PROCESS                       | 7    | 0.242299 | 0.607653 | 0.961905  | 0.998616  | 1.000      |
| 247  | GOBP-EPHRA-RECEPTOR-SIGNALING-PATHWAY                            | 5    | 0.274744 | 0.605327 | 0.943662  | 0.996282  | 1.000      |
| 248  | REACTOME-NEUTROPHIL-DEGRANULATION                                | 6    | 0.247467 | 0.587872 | 0.948012  | 1.000000  | 1.000      |
| 249  | GOBP-POSITIVE-REGULATION-OF-IMMUNE-RESPONSE                      | 9    | 0.208628 | 0.583028 | 0.958955  | 1.000000  | 1.000      |
| 250  | GOBP-CELL-ACTIVATION-INVOLVED-IN-IMMUNE-RESPONSE                 | 6    | 0.247467 | 0.582866 | 0.975460  | 0.997674  | 1.000      |

Continuation of Table S9

| NAME | ID                                                | SIZE          | ES | NES       | NOM.p.val | FDR.q.val | FWER.p.val |
|------|---------------------------------------------------|---------------|----|-----------|-----------|-----------|------------|
| 256  | GOBP-MYELOID-LEUKOCYTE-MEDIATED-IMMUNITY          | GO-0002444    | 6  | 0.247407  | 0.580452  | 0.972299  | 0.995074   |
| 257  | GOBP-LEUKOCYTE-MEDIATED-IMMUNITY                  | GO-0002443    | 8  | 0.222188  | 0.572327  | 0.980519  | 0.995039   |
| 258  | GOBP-PROTEIN_COMPLEX-OLIGOMERIZATION              | GO-0051259    | 7  | 0.222222  | 0.552016  | 0.978593  | 0.999383   |
| 259  | GOBP-ANATOMICAL-STRUCTURE-HOMEOSTASIS             | GO-0060249    | 7  | 0.226566  | 0.548169  | 0.991404  | 0.996942   |
| 260  | GOBP-CELLULAR-RESPONSE-TO-EXTRACELLULAR-STIMULUS  | GO-0031668    | 8  | 0.202274  | 0.543000  | 0.993289  | 0.994646   |
| 261  | REACTOME-ONCOGENIC-MAPK-SIGNALING                 | R-HSA-6802957 | 5  | 0.248600  | 0.535473  | 0.994429  | 0.992668   |
| 262  | GOBP-LIPID-METABOLIC-PROCESS                      | GO-0006629    | 10 | 0.166667  | 0.470092  | 1.000000  | 0.998360   |
| 263  | GOBP-BIOLOGICAL-PROCESS-INVOLVED-IN-SYMBIOTIC-... | GO-0004440    | 10 | -0.179329 | -0.434554 | 0.997063  | 0.997894   |
| 264  | REACTOME-DISEASES-OF-SIGNAL-TRANSDUCTION-BY-GR... | R-HSA-5663202 | 12 | -0.178560 | -0.448273 | 1.000000  | 0.999064   |
| 265  | GOBP-POSITIVE-REGULATION-OF-NEURON-PROJECTION...  | GO-0010976    | 5  | -0.240354 | -0.463801 | 0.990385  | 0.999698   |
| 266  | REACTOME-INNATE-IMMUNE-SYSTEM                     | R-RNO-168249  | 16 | -0.178249 | -0.477495 | 0.993270  | 0.999902   |
| 267  | REACTOME-CIRCADIAN-CLOCK                          | R-HSA-400253  | 5  | -0.255756 | -0.495929 | 0.983508  | 0.998695   |
| 268  | GOBP-PROTEIN-CONTAINING-COMPLEX-SUBUNIT-ORGANI... | GO-00043933   | 15 | -0.185927 | -0.496951 | 0.988205  | 1.000000   |
| 269  | GOBP-CIRCULATORY-SYSTEM-DEVELOPMENT               | GO-0072359    | 21 | -0.170903 | -0.497220 | 0.992126  | 1.000000   |
| 270  | GOBP-CELL-CELL-SIGNALING-BY-WNT                   | GO-0198738    | 7  | -0.229118 | -0.498419 | 0.989521  | 1.000000   |
| 271  | GOBP-POSITIVE-REGULATION-OF-HEMOPOIESIS           | GO-1903708    | 7  | -0.229569 | -0.500749 | 0.990881  | 1.000000   |
| 272  | GOBP-NEGATIVE-REGULATION-OF-NEUROUS-SYSTEM.DEV... | GO-0051961    | 5  | -0.255329 | -0.501313 | 0.992320  | 1.000000   |
| 273  | GOBP-RESPONSE-TO-TUMOR-NECROSIS-FACTOR            | GO-0034612    | 7  | -0.233210 | -0.505677 | 0.991018  | 1.000000   |
| 274  | REACTOME-INFECTIOUS-DISEASE                       | R-HSA-5663205 | 12 | -0.203185 | -0.510681 | 0.982736  | 1.000000   |
| 275  | GOBP-NEGATIVE-REGULATION-OF-INTRACELLULAR-SIGN... | GO-1902532    | 7  | -0.239241 | -0.521006 | 0.984849  | 1.000000   |
| 276  | GOBP-IMMUNE-SYSTEM-DEVELOPMENT                    | GO-0002520    | 17 | -0.199439 | -0.544372 | 0.971698  | 1.000000   |
| 277  | GOBP-CELLULAR-LIPID-METABOLIC-PROCESS             | GO-00404255   | 7  | -0.250086 | -0.544572 | 0.979167  | 1.000000   |
| 278  | GOBP-RESPONSE-TO-INORGANIC-SUBSTANCE              | GO-0010035    | 19 | -0.195007 | -0.551509 | 0.984416  | 1.000000   |
| 279  | GOBP-ANIMAL-ORGAN-MORPHOGENESIS                   | GO-0009887    | 12 | -0.221411 | -0.553618 | 0.964132  | 1.000000   |
| 280  | GOBP-APOPTOTIC-PROCESS                            | GO-0006915    | 35 | -0.180580 | -0.558051 | 0.977025  | 1.000000   |
| 281  | REACTOME-CELLULAR-RESPONSES-TO-EXTERNAL-STIMULI   | R-RNO-8953897 | 11 | -0.227507 | -0.558368 | 0.956091  | 1.000000   |
| 282  | GOBP-LIPID-BIOSYNTHETIC-PROCESS                   | GO-0008610    | 6  | -0.270764 | -0.560922 | 0.960177  | 1.000000   |
| 283  | GOBP-REGULATION-OF-DNA-BINDING-TRANSCRIPTION.F... | GO-0051090    | 16 | -0.204344 | -0.562120 | 0.962517  | 1.000000   |
| 284  | GOBP-POSITIVE-REGULATION-OF-LOCOMOTION            | GO-0040017    | 11 | -0.232819 | -0.563489 | 0.968706  | 1.000000   |
| 285  | GOBP-REGULATION-OF-LIPID-BIOSYNTHETIC-PROCESS     | GO-0046890    | 6  | -0.270764 | -0.564983 | 0.963127  | 1.000000   |
| 286  | GOBP-CYTOSKELETON-ORGANIZATION                    | GO-0007010    | 11 | -0.228390 | -0.565010 | 0.964626  | 1.000000   |
| 287  | GOBP-NEURON-MIGRATION                             | GO-0001764    | 5  | -0.300690 | -0.581807 | 0.952756  | 1.000000   |
| 288  | GOBP-NUCLEAR-TRANSPORT                            | GO-0051169    | 5  | -0.293542 | -0.581813 | 0.960784  | 1.000000   |
| 289  | GOBP-REGULATION-OF-PHOSPHATIDYLINOSITOL-3-KINA... | GO-0014066    | 6  | -0.281220 | -0.584534 | 0.954887  | 1.000000   |
| 290  | GOBP-REGULATION-OF-PEPTIDE-TRANSPORT              | GO-0090087    | 10 | -0.243987 | -0.585408 | 0.935714  | 1.000000   |
| 291  | GOBP-REGULATION-OF-CYSTEINE-TYPE-ENDOPEPTIDASE... | GO-2000116    | 9  | -0.250140 | -0.586104 | 0.937053  | 1.000000   |
| 292  | GOBP-RESPIRATORY-SYSTEM-DEVELOPMENT               | GO-0060541    | 6  | -0.283180 | -0.589555 | 0.943164  | 1.000000   |
| 293  | GOBP-MONONUCLEAR-CELL-DIFFERENTIATION             | GO-1903131    | 7  | -0.270395 | -0.591864 | 0.956140  | 1.000000   |
| 294  | GOBP-ORGANIC-HYDROXY-COMPOUND-METABOLIC-PROCESS   | GO-1901615    | 8  | -0.262872 | -0.596172 | 0.953938  | 1.000000   |
| 295  | GOBP-POSITIVE-REGULATION-OF-CELL-PROJECTION-OR... | GO-0031346    | 10 | -0.247651 | -0.596987 | 0.944915  | 1.000000   |
| 296  | GOBP-NEGATIVE-REGULATION-OF-LIPID-METABOLIC-PR... | GO-0045833    | 5  | -0.308315 | -0.601860 | 0.937405  | 1.000000   |
| 297  | REACTOME-NEUROUS-SYSTEM-DEVELOPMENT               | R-RNO-9675108 | 14 | -0.233211 | -0.602211 | 0.956522  | 1.000000   |
| 298  | GOBP-POSITIVE-REGULATION-OF-RESPONSE-TO-EXTERN... | GO-0032103    | 9  | -0.261353 | -0.603062 | 0.943503  | 1.000000   |

Continuation of Table S9

| NAME | ID                                                 | SIZE          | ES | NES       | NOM.p.val | FDR.q.val | FWER.p.val |
|------|----------------------------------------------------|---------------|----|-----------|-----------|-----------|------------|
| 299  | REACTOME_INTERFERON_SIGNALING                      | R-RNO-913531  | 6  | -0.28557  | -0.603072 | 1.000000  | 1.000      |
| 300  | GOBP_TELENCEPHALON_DEVELOPMENT                     | GO-0021537    | 7  | -0.275313 | -0.603441 | 1.000000  | 1.000      |
| 301  | GOBP_POSITIVE_REGULATION_OF_MYELOID_LEUKOCYTE....  | GO-0002763    | 6  | -0.287351 | -0.605260 | 1.000000  | 1.000      |
| 302  | GOBP_CIRCADIAN_REGULATION_OF_GENE_EXPRESSION       | GO-0032922    | 5  | -0.308461 | -0.607590 | 1.000000  | 1.000      |
| 303  | GOBP_NEGATIVE_REGULATION_OF_SIGNALING              | GO-0023057    | 21 | -0.215381 | -0.608682 | 1.000000  | 1.000      |
| 304  | GOBP_DEFENSE_RESPONSE_TO_OTHER_ORGANISM            | GO-0098542    | 9  | -0.260768 | -0.609968 | 1.000000  | 1.000      |
| 305  | GOBP_CELLULAR_RESPONSE_TO_MOLECULE_OF_BACTERIA...  | GO-0071219    | 8  | -0.270911 | -0.610336 | 1.000000  | 1.000      |
| 306  | REACTOME_LEISHMANIA_INFECTION                      | R-HSA-9658195 | 10 | -0.257436 | -0.611593 | 1.000000  | 1.000      |
| 307  | GOBP_CELLULAR_RESPONSE_TO_BIOTIC_STIMULUS          | GO-0071216    | 8  | -0.270911 | -0.611624 | 1.000000  | 1.000      |
| 308  | GOBP_ERBB_SIGNALING_PATHWAY                        | GO-0038127    | 5  | -0.319923 | -0.621744 | 1.000000  | 1.000      |
| 309  | GOBP_POSITIVE_REGULATION_OF_MAP_KINASE_ACTIVITY    | GO-0043406    | 6  | -0.306670 | -0.625931 | 1.000000  | 1.000      |
| 310  | GOBP_RESPONSE_TO_EXTRACELLULAR_STIMULUS            | GO-0009991    | 13 | -0.246978 | -0.634605 | 1.000000  | 1.000      |
| 311  | GOBP_NEURON_DEATH                                  | GO-0070997    | 18 | -0.227754 | -0.635226 | 1.000000  | 1.000      |
| 312  | GOBP_CELLULAR_RESPONSE_TO_NITROGEN_COMPOUND        | GO-1901699    | 20 | -0.224352 | -0.635442 | 1.000000  | 1.000      |
| 313  | GOBP_ACTIVATION_OF_MAPK_ACTIVITY                   | GO-0000187    | 6  | -0.306670 | -0.638037 | 1.000000  | 1.000      |
| 314  | HALLMARK_HYPOXIA                                   | M5891         | 5  | -0.322070 | -0.639832 | 1.000000  | 1.000      |
| 315  | GOBP_POSITIVE_REGULATION_OF_CELLULAR_PROTEIN_L...  | GO-1903829    | 7  | -0.294354 | -0.642755 | 1.000000  | 1.000      |
| 316  | GOBP_POSITIVE_REGULATION_OF_CELL_POPULATION_PR...  | GO-0006284    | 21 | -0.226068 | -0.645987 | 1.000000  | 1.000      |
| 317  | GOBP_REGULATION_OF_PEPTIDE_SECRETION               | GO-0002791    | 7  | -0.294719 | -0.646563 | 1.000000  | 1.000      |
| 318  | GOBP_REGULATION_OF_CELLULAR_COMPONENT_MOVEMENT     | GO-0051270    | 15 | -0.243574 | -0.647458 | 1.000000  | 1.000      |
| 319  | GOBP_LEUKOCYTE_DIFFERENTIATION                     | GO-0002521    | 15 | -0.244640 | -0.647501 | 1.000000  | 1.000      |
| 320  | GOBP_NEURON_APOPTOTIC_PROCESS                      | GO-0051402    | 12 | -0.257323 | -0.649058 | 1.000000  | 1.000      |
| 321  | GOBP_RESPONSE_TO_INSULIN                           | GO-0032868    | 5  | -0.334018 | -0.649925 | 1.000000  | 1.000      |
| 322  | GOBP_NEGATIVE_REGULATION_OF_TRANSCRIPTION_BY_R...  | GO-0000122    | 10 | -0.269231 | -0.650027 | 1.000000  | 1.000      |
| 323  | GOBP_MALE_GAMETE_GENERATION                        | GO-0048232    | 5  | -0.335495 | -0.650874 | 1.000000  | 1.000      |
| 324  | GOBP_REGULATION_OF_PHOSPHOLIPASE_ACTIVITY          | GO-0010517    | 6  | -0.320280 | -0.651386 | 1.000000  | 1.000      |
| 325  | GOBP_REPRODUCTIVE_SYSTEM_DEVELOPMENT               | GO-0061458    | 6  | -0.308844 | -0.651444 | 1.000000  | 1.000      |
| 326  | GOBP_ENDOCYTOSIS                                   | GO-0006897    | 8  | -0.287483 | -0.651584 | 1.000000  | 1.000      |
| 327  | GOBP_ESTABLISHMENT_OF_PROTEIN_LOCALIZATION_TO...   | GO-0072594    | 5  | -0.331139 | -0.652206 | 1.000000  | 1.000      |
| 328  | GOBP_NEGATIVE_REGULATION_OF_IMMUNE_SYSTEM_PROCE... | GO-0002683    | 5  | -0.329963 | -0.655059 | 1.000000  | 1.000      |
| 329  | GOBP_REGULATION_OF_CELLULAR_LOCALIZATION           | GO-0060341    | 17 | -0.235582 | -0.656158 | 1.000000  | 1.000      |
| 330  | GOBP_LEARNING                                      | GO-0007612    | 13 | -0.258925 | -0.658551 | 1.000000  | 1.000      |
| 331  | REACTOME_FC_EPSILON_RECEPTOR_FCBRL_SIGNALING       | R-RNO-2454202 | 7  | -0.302159 | -0.661043 | 1.000000  | 1.000      |
| 332  | GOBP_NEGATIVE_REGULATION_OF_KINASE_ACTIVITY        | GO-0033673    | 5  | -0.337317 | -0.661533 | 1.000000  | 1.000      |
| 333  | GOBP_POSITIVE_REGULATION_OF_PROTEOLYSIS            | GO-0045862    | 8  | -0.293849 | -0.664012 | 1.000000  | 1.000      |
| 334  | GOBP_FC_EPSILON_RECEPTOR_SIGNALING_PATHWAY         | GO-0038095    | 7  | -0.302159 | -0.665279 | 1.000000  | 1.000      |
| 335  | GOBP_NEGATIVE_REGULATION_OF_TRANSFERASE_ACTIVITY   | GO-0051348    | 5  | -0.337317 | -0.667390 | 1.000000  | 1.000      |
| 336  | GOBP_REGULATION_OF_LIPASE_ACTIVITY                 | GO-0060191    | 6  | -0.320280 | -0.668285 | 1.000000  | 1.000      |
| 337  | GOBP_GROWTH                                        | GO-0040007    | 14 | -0.259607 | -0.680803 | 1.000000  | 1.000      |
| 338  | GOBP_SENSORY_ORGAN_DEVELOPMENT                     | GO-0007423    | 8  | -0.305097 | -0.684877 | 1.000000  | 1.000      |
| 339  | GOBP_REGULATION_OF_SYNAPSE_STRUCTURE_OR_ACTIVITY   | GO-0050803    | 11 | -0.275554 | -0.684977 | 1.000000  | 1.000      |
| 340  | GOBP_POSITIVE_REGULATION_OF_LIPASE_ACTIVITY        | GO-0060193    | 5  | -0.354080 | -0.687315 | 1.000000  | 1.000      |
| 341  | GOBP_CENTRAL_NERVOUS_SYSTEM_NEURON_DIFFERENTIA...  | GO-0021953    | 5  | -0.353947 | -0.690241 | 1.000000  | 1.000      |

Continuation of Table S9

|     | NAME                                              | ID            | SIZE | ES        | NES       | NOM.p.val | FDR.q.val | FWER.p.val |
|-----|---------------------------------------------------|---------------|------|-----------|-----------|-----------|-----------|------------|
| 342 | GOBP-REGULATION-OF-PHOSPHOLIPASE_C-ACTIVITY       | GO-1900274    | 5    | -0.354080 | -0.691164 | 0.866261  | 1.000000  | 1.000      |
| 343 | REACTOME-ADAPTIVE-IMMUNE-SYSTEM                   | R-RNO-1280218 | 9    | -0.299815 | -0.694748 | 0.858616  | 1.000000  | 1.000      |
| 344 | GOBP-CYTOKINE-PRODUCTION                          | GO-0001816    | 10   | -0.285218 | -0.697272 | 0.845714  | 1.000000  | 1.000      |
| 345 | GOBP-EPIDERMIS-DEVELOPMENT                        | GO-0005444    | 5    | -0.357288 | -0.698458 | 0.856925  | 1.000000  | 1.000      |
| 346 | GOBP-NEGATIVE-REGULATION-OF-RESPONSE-TO-STIMULUS  | GO-0048585    | 16   | -0.259808 | -0.702723 | 0.866667  | 1.000000  | 1.000      |
| 347 | GOBP-DEPHOSPHORYLATION                            | GO-0016311    | 7    | -0.327075 | -0.703754 | 0.841390  | 1.000000  | 1.000      |
| 348 | GOBP-PROTEIN-DEPHOSPHORYLATION                    | GO-0006470    | 7    | -0.327075 | -0.704532 | 0.861446  | 1.000000  | 1.000      |
| 349 | GOBP-PROTEIN-LOCALIZATION-TO-ORGANELLE            | GO-0033365    | 8    | -0.313187 | -0.711604 | 0.820090  | 1.000000  | 1.000      |
| 350 | GOBP-HOMEOSTASIS-OF-NUMBER-OF-CELLS               | GO-0048872    | 5    | -0.363671 | -0.713413 | 0.834375  | 1.000000  | 1.000      |
| 351 | GOBP-NEGATIVE-REGULATION-OF-APOPTOTIC-SIGNALIN... | GO-2001234    | 7    | -0.330524 | -0.716275 | 0.837446  | 1.000000  | 1.000      |
| 352 | GOBP-NEGATIVE-REGULATION-OF-BIOSYNTHETIC-PROCESS  | GO-0009890    | 13   | -0.280000 | -0.719923 | 0.833559  | 1.000000  | 1.000      |
| 353 | GOBP-APOPTOTIC-SIGNALING-PATHWAY                  | GO-0007190    | 15   | -0.275763 | -0.721857 | 0.836927  | 1.000000  | 1.000      |
| 354 | GOBP-POSITIVE-REGULATION-OF-BIOSYNTHETIC-PROCESS  | GO-0009891    | 27   | -0.242064 | -0.727331 | 0.844697  | 1.000000  | 1.000      |
| 355 | GOBP-RESPONSE-TO-PEPTIDE                          | GO-1901652    | 18   | -0.263232 | -0.729296 | 0.837057  | 1.000000  | 1.000      |
| 356 | GOBP-REGULATION-OF-PEPTIDYL-SERINE-PHOSPHORYLA... | GO-0033135    | 8    | -0.331590 | -0.730538 | 0.831871  | 1.000000  | 1.000      |
| 357 | GOBP-REGULATION-OF-HEMOPOIESIS                    | GO-1903706    | 10   | -0.303603 | -0.732527 | 0.821429  | 1.000000  | 1.000      |
| 358 | GOBP-REGULATION-OF-RECEPTOR-MEDIATED-ENDOCYTOSIS  | GO-0048259    | 5    | -0.375341 | -0.732614 | 0.827640  | 1.000000  | 1.000      |
| 359 | GOBP-REGULATION-OF-ENDOCYTOSIS                    | GO-0030100    | 6    | -0.353210 | -0.733751 | 0.808157  | 1.000000  | 1.000      |
| 360 | GOBP-EPITHELIAL-CELL-PROLIFERATION                | GO-0050673    | 12   | -0.289440 | -0.735470 | 0.804677  | 1.000000  | 1.000      |
| 361 | GOBP-DEVELOPMENTAL-MATURATION                     | GO-0021700    | 5    | -0.375720 | -0.736934 | 0.819005  | 1.000000  | 1.000      |
| 362 | GOBP-REGULATION-OF-CATABOLIC-PROCESS              | GO-0009894    | 13   | -0.286075 | -0.737480 | 0.831276  | 1.000000  | 1.000      |
| 363 | GOBP-SPROUTING-ANGIOGENESIS                       | GO-0002040    | 5    | -0.374279 | -0.738143 | 0.808847  | 1.000000  | 1.000      |
| 364 | GOBP-RECEPTOR-MEDIATED-ENDOCYTOSIS                | GO-0006898    | 6    | -0.363201 | -0.739924 | 0.804665  | 1.000000  | 1.000      |
| 365 | GOBP-REGULATION-OF-CELL-PROJECTION-ORGANIZATION   | GO-0031344    | 20   | -0.255907 | -0.740703 | 0.835092  | 1.000000  | 1.000      |
| 366 | REACTOME-PLATELET-ACTIVATION-SIGNALING-AND-AGG... | R-HSA-76002   | 7    | -0.347031 | -0.742576 | 0.813711  | 1.000000  | 1.000      |
| 367 | GOBP-NEGATIVE-REGULATION-OF-CATABOLIC-PROCESS     | GO-0009895    | 8    | -0.330968 | -0.746305 | 0.795588  | 1.000000  | 1.000      |
| 368 | GOBP-DNA-METABOLIC-PROCESS                        | GO-0006259    | 6    | -0.353444 | -0.748005 | 0.799694  | 1.000000  | 1.000      |
| 369 | GOBP-CARBOHYDRATE-HOMEOSTASIS                     | GO-0033500    | 7    | -0.348267 | -0.750478 | 0.789669  | 1.000000  | 1.000      |
| 370 | GOBP-AMEBOIDAL-TYPE-CELL-MIGRATION                | GO-0001667    | 11   | -0.311825 | -0.751778 | 0.820208  | 1.000000  | 1.000      |
| 371 | GOBP-POSITIVE-REGULATION-OF-PEPTIDYL-SERINE-PH... | GO-0033138    | 8    | -0.331590 | -0.753854 | 0.782107  | 1.000000  | 1.000      |
| 372 | GOBP-RESPONSE-TO-GROWTH-FACTOR                    | GO-0070848    | 18   | -0.272020 | -0.754047 | 0.789688  | 1.000000  | 1.000      |
| 373 | REACTOME-L1CAM-INTERACTIONS                       | R-RNO-373760  | 5    | -0.389227 | -0.754826 | 0.791069  | 1.000000  | 1.000      |
| 374 | GOBP-REGULATION-OF-MITOTIC-CELL-CYCLE             | GO-0007346    | 5    | -0.381893 | -0.756447 | 0.808777  | 1.000000  | 1.000      |
| 375 | GOBP-MYELOID-CELL-DIFFERENTIATION                 | GO-0030099    | 13   | -0.293053 | -0.758075 | 0.790859  | 1.000000  | 1.000      |
| 376 | GOBP-CELLULAR-RESPONSE-TO-STARVATION              | GO-0009267    | 5    | -0.394031 | -0.759200 | 0.800000  | 1.000000  | 1.000      |
| 377 | GOBP-RESPONSE-TO-STARVATION                       | GO-0042594    | 5    | -0.394031 | -0.760552 | 0.809524  | 1.000000  | 1.000      |
| 378 | GOBP-BEHAVIOR                                     | GO-0007610    | 33   | -0.247835 | -0.760574 | 0.817633  | 1.000000  | 1.000      |
| 379 | GOBP-REGULATION-OF-MAP-KINASE-ACTIVITY            | GO-0043405    | 9    | -0.323107 | -0.762156 | 0.767806  | 1.000000  | 1.000      |
| 380 | GOBP-REGULATION-OF-PROTEIN-CATABOLIC-PROCESS      | GO-0042176    | 7    | -0.356153 | -0.764681 | 0.787106  | 1.000000  | 1.000      |
| 381 | GOBP-PROTEIN-TETRAMERIZATION                      | GO-0051262    | 5    | -0.391983 | -0.764966 | 0.779014  | 1.000000  | 1.000      |
| 382 | GOBP-POSITIVE-REGULATION-OF-DNA-BINDING-TRANSC... | GO-0051091    | 10   | -0.320704 | -0.766860 | 0.762712  | 1.000000  | 1.000      |
| 383 | GOBP-POSITIVE-REGULATION-OF-CELLULAR-COMPONENT... | GO-0051130    | 24   | -0.264989 | -0.772238 | 0.786885  | 1.000000  | 1.000      |
| 384 | GOBP-CELL-PART-MORPHOGENESIS                      | GO-0032990    | 25   | -0.263400 | -0.773750 | 0.782383  | 1.000000  | 1.000      |

Continuation of Table S9

|     | NAME                                               | ID          | SIZE | ES        | NES       | NOM.p.val | FDR.q.val | FWER.p.val |
|-----|----------------------------------------------------|-------------|------|-----------|-----------|-----------|-----------|------------|
| 385 | GOBP-FAT_CELL-DIFFERENTIATION                      | GO-0045444  | 9    | -0.339851 | -0.774667 | 0.783167  | 1.000000  | 1.000      |
| 386 | GOBP-MUSCLE-STRUCTURE.DEVELOPMENT                  | GO-0061061  | 16   | -0.289180 | -0.775140 | 0.772606  | 1.000000  | 1.000      |
| 387 | GOBP-REGULATION-OF-ORGANELLE-ORGANIZATION          | GO-0033043  | 14   | -0.298704 | -0.777534 | 0.770805  | 1.000000  | 1.000      |
| 388 | GOBP-CELL-MORPHOGENESIS                            | GO-0000902  | 25   | -0.263400 | -0.783049 | 0.786865  | 1.000000  | 1.000      |
| 389 | REACTOME-CELL-CYCLE-MITOTIC                        | R-RNO-69278 | 5    | -0.400386 | -0.783532 | 0.766566  | 1.000000  | 1.000      |
| 390 | GOBP-TUBE-MORPHOGENESIS                            | GO-0035239  | 15   | -0.290677 | -0.783915 | 0.748290  | 1.000000  | 1.000      |
| 391 | GOBP-CELL-CELL-JUNCTION-ASSEMBLY                   | GO-0007043  | 5    | -0.397898 | -0.784814 | 0.754545  | 1.000000  | 1.000      |
| 392 | GOBP-NEUROINFLAMMATORY-RESPONSE                    | GO-00150076 | 5    | -0.399230 | -0.785665 | 0.753012  | 1.000000  | 1.000      |
| 393 | GOBP-CELLULAR-RESPONSE-TO-INORGANIC-SUBSTANCE      | GO-0071241  | 11   | -0.316262 | -0.788489 | 0.759184  | 1.000000  | 1.000      |
| 394 | GOBP-NEGATIVE-REGULATION-OF-CELL-POPULATION-PR...  | GO-0008285  | 9    | -0.340725 | -0.791447 | 0.746398  | 1.000000  | 1.000      |
| 395 | GOBP-CELLULAR-COMPONENT-MORPHOGENESIS              | GO-0032989  | 25   | -0.263400 | -0.792434 | 0.769231  | 1.000000  | 1.000      |
| 396 | GOBP-POSITIVE-REGULATION-OF-CATION-TRANSMEMBRAN... | GO-1904064  | 5    | -0.404117 | -0.795291 | 0.767255  | 1.000000  | 1.000      |
| 397 | GOBP-TRANSMEMBRANE-RECEPTOR-PROTEIN-SERINE-THR...  | GO-0007178  | 6    | -0.379655 | -0.796434 | 0.735795  | 1.000000  | 1.000      |
| 398 | GOBP-RESPONSE-TO-TEMPERATURE-STIMULUS              | GO-0009266  | 9    | -0.336293 | -0.797530 | 0.729323  | 1.000000  | 1.000      |
| 399 | GOBP-PEPTIDYL-TYROSINE-MODIFICATION                | GO-0018212  | 10   | -0.333938 | -0.802633 | 0.725989  | 1.000000  | 1.000      |
| 400 | GOBP-MULTICELLULAR-ORGANISMAL-HOMEOSTASIS          | GO-0048871  | 12   | -0.325111 | -0.803995 | 0.725784  | 1.000000  | 1.000      |
| 401 | GOBP-INNATE-IMMUNE-RESPONSE                        | GO-0045087  | 7    | -0.368286 | -0.804406 | 0.721068  | 1.000000  | 1.000      |
| 402 | GOBP-REGULATION-OF-LEUKOCYTE-DIFFERENTIATION       | GO-1902105  | 9    | -0.345681 | -0.804544 | 0.731214  | 1.000000  | 1.000      |
| 403 | GOBP-REGULATION-OF-PEPTIDYL-TYROSINE-PHOSPHORY...  | GO-0050730  | 9    | -0.343501 | -0.805350 | 0.741007  | 1.000000  | 1.000      |
| 404 | GOBP-RESPONSE-TO-BIOTIC-STIMULUS                   | GO-0009607  | 17   | -0.297343 | -0.808397 | 0.736983  | 1.000000  | 1.000      |
| 405 | GOBP-REGULATION-OF-MYELOID-CELL-DIFFERENTIATION    | GO-0045637  | 9    | -0.349627 | -0.809240 | 0.739007  | 1.000000  | 1.000      |
| 406 | GOBP-RESPONSE-TO-BACTERIUM                         | GO-0009617  | 13   | -0.313414 | -0.809316 | 0.723577  | 1.000000  | 1.000      |
| 407 | GOBP-POSITIVE-REGULATION-OF-PEPTIDYL-TYROSINE...   | GO-0050731  | 8    | -0.357239 | -0.809377 | 0.729412  | 1.000000  | 1.000      |
| 408 | GOBP-POSITIVE-REGULATION-OF-PEPTIDASE-ACTIVITY     | GO-0010952  | 7    | -0.383056 | -0.811760 | 0.732475  | 1.000000  | 1.000      |
| 409 | GOBP-NEGATIVE-REGULATION-OF-NEURON-APOPTOTIC-P...  | GO-0043524  | 8    | -0.364989 | -0.812192 | 0.740371  | 1.000000  | 1.000      |
| 410 | GOBP-RESPONSE-TO-MOLECULE-OF-BACTERIAL-ORIGIN      | GO-0002237  | 13   | -0.313414 | -0.812485 | 0.722071  | 1.000000  | 1.000      |
| 411 | GOBP-RESPONSE-TO-KETONE                            | GO-1901654  | 7    | -0.371915 | -0.812528 | 0.735649  | 1.000000  | 1.000      |
| 412 | GOBP-POSITIVE-REGULATION-OF-EPITHELIAL-CELL-PR...  | GO-0050679  | 7    | -0.375596 | -0.812759 | 0.723684  | 1.000000  | 1.000      |
| 413 | GOBP-REGULATION-OF-TRANSMEMBRANE-TRANSPORT         | GO-0034762  | 23   | -0.279179 | -0.812946 | 0.751948  | 1.000000  | 1.000      |
| 414 | GOBP-MYELOID-LEUKOCYTE-DIFFERENTIATION             | GO-0002573  | 11   | -0.331706 | -0.820860 | 0.716292  | 1.000000  | 1.000      |
| 415 | GOBP-POSITIVE-REGULATION-OF-PROTEIN-SERINE-THR...  | GO-0071902  | 9    | -0.347650 | -0.820937 | 0.686630  | 1.000000  | 1.000      |
| 416 | GOBP-REGULATION-OF-APOPTOTIC-SIGNALING-PATHWAY     | GO-2001233  | 10   | -0.339242 | -0.821410 | 0.713246  | 1.000000  | 1.000      |
| 417 | GOBP-BIOLOGICAL-ADHESION                           | GO-0022610  | 19   | -0.293850 | -0.821840 | 0.709347  | 1.000000  | 1.000      |
| 418 | GOBP-PHAGOCYTOSIS                                  | GO-0006909  | 5    | -0.412207 | -0.822766 | 0.680000  | 1.000000  | 1.000      |
| 419 | GOBP-NEGATIVE-REGULATION-OF-CELL-PROJECTION-OR...  | GO-0031345  | 5    | -0.425651 | -0.824410 | 0.684533  | 1.000000  | 1.000      |
| 420 | GOBP-POSITIVE-REGULATION-OF-ORGANELLE-ORGANIZA...  | GO-0010638  | 10   | -0.343888 | -0.829104 | 0.704964  | 1.000000  | 1.000      |
| 421 | GOBP-ORGANIC-ACID-METABOLIC-PROCESS                | GO-0006082  | 7    | -0.390387 | -0.829716 | 0.728097  | 1.000000  | 1.000      |
| 422 | GOBP-CELLULAR-RESPONSE-TO-OXYGEN-CONTAINING-CO...  | GO-1901701  | 29   | -0.276307 | -0.829767 | 0.707347  | 1.000000  | 1.000      |
| 423 | GOBP-POSITIVE-REGULATION-OF-CYSTEINE-TYPE-ENDO...  | GO-2001056  | 7    | -0.382056 | -0.830499 | 0.699387  | 1.000000  | 1.000      |
| 424 | GOBP-POSITIVE-REGULATION-OF-SMALL-MOLECULE-MET...  | GO-0062013  | 5    | -0.429502 | -0.833493 | 0.687888  | 1.000000  | 1.000      |
| 425 | GOBP-COGNITION                                     | GO-0050890  | 28   | -0.278408 | -0.834299 | 0.711970  | 1.000000  | 1.000      |
| 426 | GOBP-CELLULAR-RESPONSE-TO-ORGANIC-CYCLIC-COMPOUND  | GO-0071407  | 13   | -0.327560 | -0.840052 | 0.687764  | 1.000000  | 1.000      |
| 427 | GOBP-CELL-CYCLE-PROCESS                            | GO-0022402  | 11   | -0.341129 | -0.841574 | 0.684357  | 1.000000  | 1.000      |

Continuation of Table S9

|     | NAME                                              | ID            | SIZE | ES        | NES       | NOM.p.val | FDR.q.val | FWER.p.val |
|-----|---------------------------------------------------|---------------|------|-----------|-----------|-----------|-----------|------------|
| 428 | GOBP-FOREBRAIN-DEVELOPMENT                        | GO-0030900    | 10   | -0.353807 | -0.843280 | 0.658640  | 1.000000  | 1.000      |
| 429 | GOBP-VASCULATURE-DEVELOPMENT                      | GO-0001944    | 17   | -0.313169 | -0.846862 | 0.667092  | 1.000000  | 1.000      |
| 430 | GOBP-LONG-TERM-MEMORY                             | GO-0007616    | 6    | -0.418945 | -0.848965 | 0.677321  | 1.000000  | 1.000      |
| 431 | GOBP-SMALL-MOLECULE-METABOLIC-PROCESS             | GO-0044281    | 16   | -0.315272 | -0.849990 | 0.672000  | 1.000000  | 1.000      |
| 432 | GOBP-REGULATION-OF-EPITHELIAL-CELL-MIGRATION      | GO-0010632    | 11   | -0.412437 | -0.850164 | 0.669219  | 1.000000  | 1.000      |
| 433 | GOBP-NEGATIVE-REGULATION-OF-NEURON-DEATH          | GO-1901215    | 11   | -0.346541 | -0.851593 | 0.666195  | 1.000000  | 1.000      |
| 434 | GOBP-POSITIVE-REGULATION-OF-TRANSCRIPTION_BY_R... | GO-0045944    | 24   | -0.288382 | -0.854771 | 0.661125  | 1.000000  | 1.000      |
| 435 | GOBP-SEXUAL-REPRODUCTION                          | GO-0019953    | 10   | -0.361216 | -0.855437 | 0.651982  | 1.000000  | 1.000      |
| 436 | HALLMARK-ALLOGRAFT-REJECTION                      | M5950         | 7    | -0.398766 | -0.856491 | 0.672464  | 1.000000  | 1.000      |
| 437 | GOBP-POSITIVE-REGULATION-OF-SECRETION             | GO-0051047    | 6    | -0.417540 | -0.856519 | 0.658574  | 1.000000  | 1.000      |
| 438 | GOBP-RESPONSE-TO-ORGANIC-CYCLIC-COMPOUND          | GO-0014070    | 20   | -0.303278 | -0.858286 | 0.683463  | 1.000000  | 1.000      |
| 439 | GOBP-AXON-DEVELOPMENT                             | GO-0061564    | 18   | -0.311245 | -0.859383 | 0.660027  | 1.000000  | 1.000      |
| 440 | GOBP-EXOCYTOSIS                                   | GO-0006887    | 11   | -0.341889 | -0.861158 | 0.644719  | 1.000000  | 1.000      |
| 441 | GOBP-POSITIVE-REGULATION-OF-EPITHELIAL-CELL-MI... | GO-0010634    | 5    | -0.438783 | -0.864717 | 0.674961  | 1.000000  | 1.000      |
| 442 | GOBP-CELL-ACTIVATION                              | GO-0001775    | 22   | -0.301399 | -0.866613 | 0.667529  | 1.000000  | 1.000      |
| 443 | REACTOME-SIGNALING-BY-NTRK2-TRKB                  | R-RNO-9006115 | 6    | -0.425140 | -0.866803 | 0.650915  | 1.000000  | 1.000      |
| 444 | GOBP-INTRACELLULAR-PROTEIN-TRANSPORT              | GO-0006886    | 8    | -0.390332 | -0.867577 | 0.636914  | 1.000000  | 1.000      |
| 445 | GOBP-NEURON-DEVELOPMENT                           | GO-0048666    | 34   | -0.286932 | -0.868466 | 0.685680  | 1.000000  | 1.000      |
| 446 | GOBP-REGULATION-OF-CELL-ADHESION                  | GO-0030155    | 13   | -0.335171 | -0.869829 | 0.671683  | 1.000000  | 1.000      |
| 447 | GOBP-RECEPTOR-INTERNALIZATION                     | GO-0031623    | 5    | -0.445387 | -0.872766 | 0.641509  | 1.000000  | 1.000      |
| 448 | GOBP-INTRACELLULAR-TRANSPORT                      | GO-0046907    | 10   | -0.359076 | -0.873243 | 0.622669  | 1.000000  | 1.000      |
| 449 | GOBP-CARBOHYDRATE-DERIVATIVE-BIOSYNTHETIC-PROCESS | GO-1901137    | 5    | -0.449552 | -0.874398 | 0.663987  | 1.000000  | 1.000      |
| 450 | GOBP-REGULATION-OF-MAPK-CASCADE                   | GO-0043408    | 13   | -0.337748 | -0.875682 | 0.616690  | 1.000000  | 1.000      |
| 451 | GOBP-NEGATIVE-REGULATION-OF-PHOSPHORUS-METABOL... | GO-0010563    | 9    | -0.372811 | -0.876602 | 0.641135  | 1.000000  | 1.000      |
| 452 | GOBP-ORGANIC-ACID-TRANSPORT                       | GO-0015849    | 7    | -0.406930 | -0.876939 | 0.648286  | 1.000000  | 1.000      |
| 453 | GOBP-NEGATIVE-REGULATION-OF-CELLULAR-COMPONENT... | GO-0051129    | 11   | -0.355887 | -0.878647 | 0.639437  | 1.000000  | 1.000      |
| 454 | GOBP-RESPONSE-TO-OXYGEN-CONTAINING-COMPOUND       | GO-1901700    | 39   | -0.279630 | -0.879353 | 0.676792  | 1.000000  | 1.000      |
| 455 | GOBP-NEGATIVE-REGULATION-OF-NUCLEOBASE-CONTAIN... | GO-0045934    | 13   | -0.345992 | -0.881489 | 0.628809  | 1.000000  | 1.000      |
| 456 | GOBP-POSTTRANSCRIPTIONAL-REGULATION-OF-GENE-EX... | GO-0010608    | 8    | -0.390883 | -0.881649 | 0.615611  | 1.000000  | 1.000      |
| 457 | GOBP-FATTY-ACID-TRANSPORT                         | GO-0015908    | 6    | -0.430345 | -0.881809 | 0.665680  | 1.000000  | 1.000      |
| 458 | GOBP-RECEPTOR-METABOLIC-PROCESS                   | GO-0043112    | 5    | -0.445387 | -0.881980 | 0.647239  | 1.000000  | 1.000      |
| 459 | HALLMARK-EPITHELIAL-MESENCHYMAL-TRANSITION        | M5930         | 5    | -0.454682 | -0.884296 | 0.629630  | 1.000000  | 1.000      |
| 460 | GOBP-NEGATIVE-REGULATION-OF-DEVELOPMENTAL-PROCESS | GO-0051093    | 13   | -0.349337 | -0.887796 | 0.610169  | 1.000000  | 1.000      |
| 461 | GOBP-NEGATIVE-REGULATION-OF-PROTEIN-CATABOLIC...  | GO-0042177    | 5    | -0.456622 | -0.888480 | 0.630745  | 1.000000  | 1.000      |
| 462 | GOBP-RESPONSE-TO-ALCOHOL                          | GO-0097305    | 11   | -0.363933 | -0.889245 | 0.638327  | 1.000000  | 1.000      |
| 463 | GOBP-REGULATION-OF-PROTEIN-KINASE-ACTIVITY        | GO-0045859    | 21   | -0.318997 | -0.893178 | 0.616883  | 1.000000  | 1.000      |
| 464 | GOBP-TISSUE-MORPHOGENESIS                         | GO-0048729    | 7    | -0.410229 | -0.895797 | 0.595930  | 1.000000  | 1.000      |
| 465 | GOBP-NEGATIVE-REGULATION-OF-PHOSPHORYLATION       | GO-0042326    | 7    | -0.420976 | -0.896146 | 0.611963  | 1.000000  | 1.000      |
| 466 | GOBP-PROTEIN-MODIFICATION-BY-SMALL-PROTEIN-CON... | GO-0070647    | 7    | -0.416143 | -0.896345 | 0.627422  | 1.000000  | 1.000      |
| 467 | GOBP-CELL-MORPHOGENESIS-INVOLVED-IN-NEURON-DIF... | GO-0048667    | 22   | -0.310800 | -0.896685 | 0.604381  | 1.000000  | 1.000      |
| 468 | GOBP-NERVE-DEVELOPMENT                            | GO-0021675    | 9    | -0.382326 | -0.899195 | 0.628040  | 1.000000  | 1.000      |
| 469 | GOBP-NEGATIVE-REGULATION-OF-CELL-DIFFERENTIATION  | GO-0045596    | 13   | -0.349337 | -0.900835 | 0.607789  | 1.000000  | 1.000      |
| 470 | GOBP-CELL-PROJECTION-ORGANIZATION                 | GO-0030030    | 35   | -0.291049 | -0.902601 | 0.624526  | 1.000000  | 1.000      |



Continuation of Table S9

|     | NAME                                              | ID            | SIZE | ES        | NES       | NOM.p.val | FDR.q.val | FWER.p.val |
|-----|---------------------------------------------------|---------------|------|-----------|-----------|-----------|-----------|------------|
| 471 | GOBP-CENTRAL-NERVOUS-SYSTEM-DEVELOPMENT           | GO-0007417    | 27   | -0.306093 | -0.903294 | 0.630065  | 1.000000  | 1.000      |
| 472 | GOBP-REGULATION-OF-GTPASE-ACTIVITY                | GO-0043087    | 5    | -0.468821 | -0.903542 | 0.618380  | 1.000000  | 1.000      |
| 473 | GOBP-REGULATION-OF-MYELOID-LEUKOCYTE-DIFFERENT... | GO-0002761    | 8    | -0.402165 | -0.903545 | 0.596439  | 1.000000  | 1.000      |
| 474 | GOBP-CELL-MORPHOGENESIS-INVOLVED-IN-DIFFERENTI... | GO-0000904    | 22   | -0.310800 | -0.906143 | 0.599179  | 1.000000  | 1.000      |
| 475 | GOBP-NEUROGENESIS                                 | GO-0002208    | 41   | -0.289017 | -0.906875 | 0.605583  | 1.000000  | 1.000      |
| 476 | GOBP-MEMBRANE-ORGANIZATION                        | GO-0061024    | 12   | -0.357829 | -0.906955 | 0.587671  | 1.000000  | 1.000      |
| 477 | GOBP-REGULATION-OF-HYDROLASE-ACTIVITY             | GO-0051336    | 22   | -0.316071 | -0.907069 | 0.590226  | 1.000000  | 1.000      |
| 478 | GOBP-REGULATION-OF-SYNAPTIC-TRANSMISSION-GLUTA... | GO-0051966    | 12   | -0.359162 | -0.908388 | 0.576976  | 1.000000  | 1.000      |
| 479 | GOBP-CELL-SURFACE-RECEPTOR-SIGNALING-PATHWAY-I... | GO-1905114    | 15   | -0.340396 | -0.913454 | 0.575472  | 1.000000  | 1.000      |
| 480 | GOBP-REGULATION-OF-ENDOTHELIAL-CELL-MIGRATION     | GO-0010594    | 5    | -0.472437 | -0.913488 | 0.595777  | 1.000000  | 1.000      |
| 481 | GOBP-POSITIVE-REGULATION-OF-LONG-TERM-SYNAPTIC... | GO-1900273    | 5    | -0.464470 | -0.914546 | 0.582181  | 1.000000  | 1.000      |
| 482 | GOBP-REGULATION-OF-TRANSPERASE-ACTIVITY           | GO-0051338    | 21   | -0.318997 | -0.914913 | 0.590164  | 1.000000  | 1.000      |
| 483 | GOBP-REGULATION-OF-ANATOMICAL-STRUCTURE-MORPHO... | GO-0022603    | 17   | -0.336747 | -0.916877 | 0.591588  | 1.000000  | 1.000      |
| 484 | GOBP-NEURON-PROJECTION-GUIDANCE                   | GO-0097485    | 9    | -0.398901 | -0.918431 | 0.580370  | 1.000000  | 1.000      |
| 485 | GOBP-TAXIS                                        | GO-0042330    | 14   | -0.350577 | -0.919103 | 0.594558  | 1.000000  | 1.000      |
| 486 | GOBP-POSITIVE-REGULATION-OF-APOPTOTIC-SIGNALIN... | GO-2001235    | 5    | -0.467780 | -0.919288 | 0.587253  | 1.000000  | 1.000      |
| 487 | GOBP-TUBE-DEVELOPMENT                             | GO-0035295    | 18   | -0.335675 | -0.921567 | 0.579710  | 1.000000  | 1.000      |
| 488 | GOBP-RESPONSE-TO-PEPTIDE-HORMONE                  | GO-0043434    | 13   | -0.353696 | -0.923220 | 0.570248  | 1.000000  | 1.000      |
| 489 | GOBP-SMALL-MOLECULE-BIOSYNTHETIC-PROCESS          | GO-0044283    | 5    | -0.469987 | -0.924224 | 0.599379  | 1.000000  | 1.000      |
| 490 | REACTOME-CELL-CYCLE                               | R-RNO-1640170 | 6    | -0.450964 | -0.924601 | 0.594880  | 1.000000  | 1.000      |
| 491 | GOBP-STRIATED-MUSCLE-CELL-DIFFERENTIATION         | GO-0051146    | 9    | -0.395422 | -0.924678 | 0.561119  | 1.000000  | 1.000      |
| 492 | GOBP-PROTEIN-LOCALIZATION-TO-CELL-PERIPHERY       | GO-1990778    | 12   | -0.369396 | -0.927523 | 0.570827  | 1.000000  | 1.000      |
| 493 | REACTOME-HEMOSTASIS                               | R-RNO-109582  | 14   | -0.353735 | -0.927999 | 0.539597  | 1.000000  | 1.000      |
| 494 | GOBP-RESPONSE-TO-ETHANOL                          | GO-0045471    | 5    | -0.485894 | -0.934515 | 0.562998  | 1.000000  | 1.000      |
| 495 | GOBP-MACROMOLECULE-CATABOLIC-PROCESS              | GO-0009057    | 11   | -0.373989 | -0.934689 | 0.564246  | 1.000000  | 1.000      |
| 496 | GOBP-TRANSMEMBRANE-TRANSPORT                      | GO-0055085    | 27   | -0.314495 | -0.934914 | 0.575604  | 1.000000  | 1.000      |
| 497 | REACTOME-ANTI-INFLAMMATORY-RESPONSE-FAVOURING...  | R-HSA-9662851 | 5    | -0.479458 | -0.939222 | 0.565831  | 1.000000  | 1.000      |
| 498 | GOBP-POSITIVE-REGULATION-OF-MAPK-CASCADE          | GO-0043410    | 9    | -0.402317 | -0.939257 | 0.558074  | 1.000000  | 1.000      |
| 499 | GOBP-NEGATIVE-REGULATION-OF-GENE-EXPRESSION       | GO-0010629    | 11   | -0.385568 | -0.940812 | 0.568182  | 1.000000  | 1.000      |
| 500 | GOBP-POSITIVE-REGULATION-OF-SIGNALING             | GO-0023056    | 34   | -0.302186 | -0.941259 | 0.555422  | 1.000000  | 1.000      |
| 501 | GOBP-POSITIVE-REGULATION-OF-NUCLEOBASE-CONTAIN... | GO-0045935    | 28   | -0.308099 | -0.941843 | 0.532828  | 1.000000  | 1.000      |
| 502 | GOBP-CELLULAR-MACROMOLECULE-LOCALIZATION          | GO-0070727    | 20   | -0.336918 | -0.942973 | 0.562500  | 1.000000  | 1.000      |
| 503 | GOBP-REGULATION-OF-RESPONSE-TO-STRESS             | GO-0080134    | 19   | -0.335504 | -0.94213  | 0.533419  | 1.000000  | 1.000      |
| 504 | GOBP-BLOOD-VESSEL-MORPHOGENESIS                   | GO-0048514    | 14   | -0.358935 | -0.946826 | 0.540184  | 1.000000  | 1.000      |
| 505 | GOBP-POSITIVE-REGULATION-OF-HYDROLASE-ACTIVITY    | GO-0051345    | 16   | -0.340691 | -0.947642 | 0.543742  | 1.000000  | 1.000      |
| 506 | GOBP-REGULATION-OF-NERVOUS-SYSTEM-PROCESS         | GO-0031644    | 8    | -0.418656 | -0.948201 | 0.534610  | 1.000000  | 1.000      |
| 507 | GOBP-PROTEIN-CATABOLIC-PROCESS                    | GO-0030163    | 8    | -0.422801 | -0.949654 | 0.542692  | 1.000000  | 1.000      |
| 508 | GOBP-WOUND-HEALING                                | GO-0042060    | 13   | -0.377088 | -0.952811 | 0.528671  | 1.000000  | 1.000      |
| 509 | GOBP-POSITIVE-REGULATION-OF-MYELOID-CELL-DIFFE... | GO-0045639    | 7    | -0.442972 | -0.957806 | 0.533033  | 1.000000  | 1.000      |
| 510 | GOBP-REGULATION-OF-SIGNALING-RECEPTOR-ACTIVITY    | GO-0010469    | 14   | -0.371588 | -0.958910 | 0.541899  | 1.000000  | 1.000      |
| 511 | GOBP-REGULATION-OF-TRANSPORTER-ACTIVITY           | GO-0032409    | 17   | -0.353068 | -0.959125 | 0.543978  | 1.000000  | 1.000      |
| 512 | GOBP-PROTEIN-LOCALIZATION-TO-CELL-JUNCTION        | GO-1902414    | 6    | -0.453162 | -0.960169 | 0.519006  | 1.000000  | 1.000      |
| 513 | GOBP-MONOAMINE-TRANSPORT                          | GO-0015844    | 5    | -0.490798 | -0.960898 | 0.528975  | 1.000000  | 1.000      |

Continuation of Table S9

| NAME                                                  | ID            | SIZE | ES        | NES       | NOM.p.val | FDR.q.val | FWER.p.val |
|-------------------------------------------------------|---------------|------|-----------|-----------|-----------|-----------|------------|
| 514 GOBP-NEGATIVE-REGULATION-OF-CELL-CYCLE            | GO-0045786    | 5    | -0.497122 | -0.962495 | 0.556982  | 1.000000  | 1.000      |
| 515 GOBP-RESPONSE-TO-MONOSACCHARIDE                   | GO-0034284    | 5    | -0.490588 | -0.964714 | 0.532813  | 1.000000  | 1.000      |
| 516 GOBP-CELL-JUNCTION-ASSEMBLY                       | GO-0034329    | 8    | -0.425645 | -0.966178 | 0.521355  | 1.000000  | 1.000      |
| 517 GOBP-LONG-TERM-SYNAPTIC-POTENTIATION              | GO-0060291    | 12   | -0.391069 | -0.966525 | 0.521862  | 1.000000  | 1.000      |
| 518 GOBP-MYOTUBE-DIFFERENTIATION                      | GO-0014902    | 5    | -0.504609 | -0.967307 | 0.511664  | 1.000000  | 1.000      |
| 519 GOBP-MITOTIC-CELL-CYCLE                           | GO-0000278    | 10   | -0.401660 | -0.967775 | 0.503597  | 1.000000  | 1.000      |
| 520 GOBP-RESPONSE-TO-CARBOHYDRATE                     | GO-0009743    | 5    | -0.490588 | -0.970067 | 0.526398  | 1.000000  | 1.000      |
| 521 GOBP-PROTEIN-AUTOPHOSPHORYLATION                  | GO-0046777    | 5    | -0.493727 | -0.972767 | 0.526081  | 1.000000  | 1.000      |
| 522 GOBP-REGULATION-OF-VASCULATURE-DEVELOPMENT        | GO-1901342    | 5    | -0.502763 | -0.972944 | 0.530735  | 1.000000  | 1.000      |
| 523 GOBP-CELLULAR-RESPONSE-TO-DNA-DAMAGE-STIMULUS     | GO-0006974    | 5    | -0.501008 | -0.977080 | 0.504870  | 1.000000  | 1.000      |
| 524 GOBP-REGULATION-OF-MUSCLE-CELL-DIFFERENTIATION    | GO-0051147    | 6    | -0.462630 | -0.978013 | 0.500732  | 1.000000  | 1.000      |
| 525 GOBP-NEURON-DIFFERENTIATION                       | GO-0030182    | 37   | -0.317397 | -0.984567 | 0.492665  | 1.000000  | 1.000      |
| 526 GOBP-DENDRITE-DEVELOPMENT                         | GO-0016358    | 10   | -0.408862 | -0.987919 | 0.482507  | 1.000000  | 1.000      |
| 527 GOBP-TISSUE-MIGRATION                             | GO-0090130    | 9    | -0.428119 | -0.990055 | 0.500697  | 1.000000  | 1.000      |
| 528 GOBP-REGULATION-OF-CELL-ACTIVATION                | GO-0050865    | 8    | -0.437033 | -0.990954 | 0.483642  | 1.000000  | 1.000      |
| 529 GOBP-REGULATION-OF-RESPONSE-TO-EXTERNAL-STIMULUS  | GO-0032101    | 15   | -0.373453 | -0.991244 | 0.487705  | 1.000000  | 1.000      |
| 530 GOBP-RESPONSE-TO-HEAT                             | GO-0009408    | 7    | -0.453312 | -0.994283 | 0.498503  | 1.000000  | 1.000      |
| 531 GOBP-REGULATION-OF-PEPTIDE-HORMONE-SECRETION      | GO-0090276    | 6    | -0.477434 | -0.995865 | 0.465774  | 1.000000  | 1.000      |
| 532 GOBP-REGULATION-OF-NEUROTRANSMITTER-RECEPTOR-A... | GO-0099601    | 13   | -0.391507 | -0.998831 | 0.472185  | 1.000000  | 1.000      |
| 533 GOBP-PROTEIN-LOCALIZATION-TO-MEMBRANE             | GO-0072657    | 13   | -0.395401 | -1.005983 | 0.470667  | 1.000000  | 1.000      |
| 534 GOBP-NEGATIVE-REGULATION-OF-PROTEIN-MODIFICATI... | GO-0031400    | 10   | -0.419755 | -1.006891 | 0.483501  | 1.000000  | 1.000      |
| 535 GOBP-POSITIVE-REGULATION-OF-PROTEIN-TYROSINE-K... | GO-0061098    | 5    | -0.523198 | -1.011460 | 0.493066  | 1.000000  | 1.000      |
| 536 GOBP-ORGANONITROGEN-COMPOUND-BIOSYNTHETIC-PROCESS | GO-1901566    | 13   | -0.396977 | -1.013550 | 0.466851  | 1.000000  | 1.000      |
| 537 GOBP-MAINTENANCE-OF-LOCATION                      | GO-0051235    | 7    | -0.468402 | -1.017832 | 0.442308  | 1.000000  | 1.000      |
| 538 GOBP-ESTABLISHMENT-OF-PROTEIN-LOCALIZATION        | GO-0045184    | 17   | -0.371833 | -1.022337 | 0.441489  | 1.000000  | 1.000      |
| 539 GOBP-REGULATION-OF-PROTEIN-TYROSINE-KINASE-ACT... | GO-0061097    | 5    | -0.523198 | -1.023947 | 0.455259  | 1.000000  | 1.000      |
| 540 GOBP-SKIN-DEVELOPMENT                             | GO-0043588    | 5    | -0.521690 | -1.024713 | 0.472403  | 1.000000  | 1.000      |
| 541 GOBP-REGULATION-OF-ANATOMICAL-STRUCTURE-SIZE      | GO-0090066    | 10   | -0.435948 | -1.026202 | 0.444142  | 1.000000  | 1.000      |
| 542 GOBP-REGULATION-OF-PHOSPHORUS-METABOLIC-PROCESS   | GO-0051174    | 26   | -0.343276 | -1.027083 | 0.426938  | 1.000000  | 1.000      |
| 543 REACTOME-SIGNALING-BY-RHO-GTPASES-MIRO-GTPASES... | R-RNO-9716542 | 9    | -0.441325 | -1.028024 | 0.441727  | 1.000000  | 1.000      |
| 544 REACTOME-RHO-GTPASE-EFFECTORS                     | R-RNO-195258  | 9    | -0.441325 | -1.029454 | 0.437768  | 1.000000  | 1.000      |
| 545 GOBP-REGULATION-OF-MUSCLE-ADAPTATION              | GO-0043502    | 5    | -0.531995 | -1.030072 | 0.450237  | 1.000000  | 1.000      |
| 546 GOBP-ENDOMEMBRANE-SYSTEM-ORGANIZATION             | GO-0010256    | 6    | -0.483640 | -1.030834 | 0.430493  | 1.000000  | 1.000      |
| 547 GOBP-SYNAPTIC-TRANSMISSION-GLUTAMATERGIC          | GO-0035249    | 13   | -0.403943 | -1.033428 | 0.428962  | 1.000000  | 1.000      |
| 548 GOBP-RESPONSE-TO-WOUNDING                         | GO-0009611    | 15   | -0.393523 | -1.038053 | 0.405442  | 1.000000  | 1.000      |
| 549 GOBP-MUSCLE-ADAPTATION                            | GO-0043500    | 5    | -0.531995 | -1.039975 | 0.436937  | 1.000000  | 1.000      |
| 550 GOBP-POSITIVE-REGULATION-OF-SYNAPTIC-TRANSMISSION | GO-0050806    | 15   | -0.393039 | -1.040106 | 0.408840  | 1.000000  | 1.000      |
| 551 GOBP-REGULATION-OF-PROTEIN-PHOSPHORYLATION        | GO-0001932    | 25   | -0.353239 | -1.043536 | 0.420724  | 1.000000  | 1.000      |
| 552 GOBP-LOCOMOTORY-BEHAVIOR                          | GO-0007626    | 8    | -0.464910 | -1.045775 | 0.428157  | 1.000000  | 1.000      |
| 553 GOBP-CHEMICAL-SYNAPTIC-TRANSMISSION-POSTSYNAPTIC  | GO-0099565    | 9    | -0.445176 | -1.053956 | 0.400875  | 1.000000  | 1.000      |
| 554 GOBP-REGULATION-OF-CELL-CELL-ADHESION             | GO-0022407    | 9    | -0.454900 | -1.055344 | 0.391679  | 1.000000  | 1.000      |
| 555 GOBP-CELLULAR-RESPONSE-TO-KETONE                  | GO-1901655    | 5    | -0.527455 | -1.055367 | 0.408951  | 1.000000  | 1.000      |
| 556 GOBP-SYNAPSE-ORGANIZATION                         | GO-0050808    | 17   | -0.386293 | -1.058257 | 0.399225  | 1.000000  | 1.000      |

Continuation of Table S9

| NAME                                                  | ID          | SIZE | ES        | NES       | NOM.p.val | FDR.q.val | FWER.p.val |
|-------------------------------------------------------|-------------|------|-----------|-----------|-----------|-----------|------------|
| 557 GOBP-POSITIVE-REGULATION_OF_TRANSPERASE-ACTIVITY  | GO-0051347  | 19   | -0.377536 | -1.065566 | 0.371728  | 1.000000  | 1.000      |
| 558 GOBP-ENDOTHELIAL-CELL-MIGRATION                   | GO-0043542  | 8    | -0.475854 | -1.066189 | 0.385650  | 1.000000  | 1.000      |
| 559 GOBP-POSITIVE-REGULATION_OF_PROTEIN_KINASE-ACT... | GO-0045860  | 18   | -0.384509 | -1.068585 | 0.390564  | 1.000000  | 1.000      |
| 560 GOBP-ORGANIC-ANION-TRANSPORT                      | GO-0015711  | 6    | -0.522709 | -1.076434 | 0.411315  | 1.000000  | 1.000      |
| 561 GOBP-CELLULAR-RESPONSE-TO-PEPTIDE                 | GO-1901653  | 13   | -0.417092 | -1.078080 | 0.375848  | 1.000000  | 1.000      |
| 562 GOBP-REGULATION_OF_HORMONE-LEVELS                 | GO-0010817  | 12   | -0.426909 | -1.078515 | 0.367925  | 1.000000  | 1.000      |
| 563 GOBP-BLOOD-VESEL-ENDOTHELIAL-CELL-MIGRATION       | GO-0043534  | 8    | -0.475854 | -1.079772 | 0.389855  | 1.000000  | 1.000      |
| 564 GOBP-CARBOXYLIC-ACID-TRANSPORT                    | GO-0046942  | 6    | -0.522709 | -1.080217 | 0.377953  | 1.000000  | 1.000      |
| 565 GOBP-AMINO-ACID-TRANSPORT                         | GO-0006865  | 6    | -0.522709 | -1.081939 | 0.368421  | 1.000000  | 1.000      |
| 566 GOBP-CIRCADIEN-RHYTHM                             | GO-0007623  | 13   | -0.418095 | -1.082361 | 0.366897  | 1.000000  | 1.000      |
| 567 GOBP-POSITIVE-REGULATION_OF_ENDOTHELIAL-CELL-P... | GO-0001938  | 6    | -0.513757 | -1.084172 | 0.365031  | 1.000000  | 1.000      |
| 568 GOBP-NERVOUS-SYSTEM-PROCESS                       | GO-0050877  | 38   | -0.347938 | -1.086358 | 0.342201  | 1.000000  | 1.000      |
| 569 GOBP-ACIDIC-AMINO-ACID-TRANSPORT                  | GO-0015800  | 5    | -0.552591 | -1.086464 | 0.366819  | 1.000000  | 1.000      |
| 570 GOBP-RESPONSE-TO-OXYGEN-LEVELS                    | GO-00070482 | 8    | -0.473609 | -1.087998 | 0.358900  | 1.000000  | 1.000      |
| 571 GOBP-REGULATION-OF-CATION-CHANNEL-ACTIVITY        | GO-2001257  | 14   | -0.419704 | -1.088703 | 0.344491  | 1.000000  | 1.000      |
| 572 GOBP-POSITIVE-REGULATION_OF_MOLECULAR-FUNCTION    | GO-0044093  | 37   | -0.347159 | -1.093316 | 0.340992  | 1.000000  | 1.000      |
| 573 GOBP-CELLULAR-GLUCOSE-HOMEOSTASIS                 | GO-0001678  | 5    | -0.563699 | -1.094113 | 0.361281  | 1.000000  | 1.000      |
| 574 GOBP-MONOCARBOXYLIC-ACID-TRANSPORT                | GO-0015718  | 5    | -0.552591 | -1.094331 | 0.372274  | 1.000000  | 1.000      |
| 575 GOBP-DICARBOXYLIC-ACID-TRANSPORT                  | GO-0006835  | 5    | -0.552591 | -1.095316 | 0.369969  | 1.000000  | 1.000      |
| 576 GOBP-REGULATION-OF-ANION-TRANSPORT                | GO-0044070  | 20   | -0.386334 | -1.095837 | 0.325641  | 1.000000  | 1.000      |
| 577 GOBP-RESPONSE-TO-DRUG                             | GO-0042493  | 11   | -0.444759 | -1.098961 | 0.326360  | 1.000000  | 1.000      |
| 578 GOBP-ENDOTHELIAL-CELL-PROLIFERATION               | GO-0001935  | 8    | -0.491416 | -1.101823 | 0.320513  | 1.000000  | 1.000      |
| 579 GOBP-MUSCLE-CELL-DIFFERENTIATION                  | GO-0042692  | 10   | -0.464815 | -1.102901 | 0.373372  | 1.000000  | 1.000      |
| 580 GOBP-CELL-CELL-ADHESION                           | GO-0098609  | 14   | -0.419438 | -1.110284 | 0.318436  | 1.000000  | 1.000      |
| 581 GOBP-CALCIUM-MEDIATED-SIGNALING                   | GO-0019722  | 10   | -0.465824 | -1.113162 | 0.318182  | 1.000000  | 1.000      |
| 582 GOBP-RESPONSE-TO-INTERLEUKIN_1                    | GO-0070555  | 5    | -0.564244 | -1.116376 | 0.329670  | 1.000000  | 1.000      |
| 583 GOBP-PEPTIDE-SECRETION                            | GO-0002790  | 9    | -0.485818 | -1.119999 | 0.326590  | 1.000000  | 1.000      |
| 584 GOBP-REGULATION-OF-LIPID-LOCALIZATION             | GO-1905952  | 5    | -0.575748 | -1.127522 | 0.315625  | 1.000000  | 1.000      |
| 585 GOBP-PEPTIDYL-AMINO-ACID-MODIFICATION             | GO-0018193  | 22   | -0.394009 | -1.129270 | 0.282946  | 1.000000  | 1.000      |
| 586 GOBP-G-PROTEIN-COUPLED-RECEPTOR-SIGNALING-PATHWAY | GO-0007186  | 18   | -0.408097 | -1.134236 | 0.308201  | 1.000000  | 1.000      |
| 587 REACTOME-RNA-POLYMERASE-II-TRANSCRIPTION          | R-RNO-73857 | 20   | -0.397488 | -1.134652 | 0.318471  | 1.000000  | 1.000      |
| 588 GOBP-REGULATION-OF-CELLULAR-RESPONSE-TO-STRESS    | GO-0080135  | 9    | -0.481712 | -1.134963 | 0.309278  | 1.000000  | 1.000      |
| 589 GOBP-REGULATION-OF-NMDA-RECEPTOR-ACTIVITY         | GO-2000310  | 10   | -0.473536 | -1.139352 | 0.309722  | 1.000000  | 1.000      |
| 590 GOBP-REGULATION-OF-PROTEIN-MODIFICATION-PROCESS   | GO-0031399  | 28   | -0.378627 | -1.139712 | 0.286064  | 1.000000  | 1.000      |
| 591 GOBP-CHROMOSOME-ORGANIZATION                      | GO-0051276  | 6    | -0.557842 | -1.141265 | 0.311526  | 1.000000  | 1.000      |
| 592 GOBP-CELLULAR-RESPONSE-TO-ALCOHOL                 | GO-0097306  | 15   | -0.596216 | -1.142470 | 0.283969  | 1.000000  | 1.000      |
| 593 GOBP-RHYTHMIC-PROCESS                             | GO-0048511  | 15   | -0.427663 | -1.142810 | 0.299724  | 1.000000  | 1.000      |
| 594 GOBP-REGULATION-OF-CATION-TRANSMEMBRANE-TRANSPORT | GO-1904062  | 16   | -0.424573 | -1.144105 | 0.298343  | 1.000000  | 1.000      |
| 595 GOBP-POSITIVE-REGULATION-OF-CELLULAR-COMPONENT... | GO-0044089  | 9    | -0.489456 | -1.145159 | 0.312769  | 1.000000  | 1.000      |
| 596 GOBP-CELLULAR-COMPONENT-MAINTENANCE               | GO-0043954  | 5    | -0.577035 | -1.145598 | 0.308442  | 1.000000  | 1.000      |
| 597 GOBP-RESPONSE-TO-HORMONE                          | GO-0009725  | 20   | -0.400516 | -1.151542 | 0.272490  | 1.000000  | 1.000      |
| 598 GOBP-ANATOMICAL-STRUCTURE-FORMATION-INVOLVED-I... | GO-0048646  | 20   | -0.411032 | -1.158368 | 0.271208  | 1.000000  | 1.000      |
| 599 GOBP-SECRETION                                    | GO-0046903  | 24   | -0.397534 | -1.161727 | 0.270130  | 1.000000  | 1.000      |

Continuation of Table S9

|     | NAME                                              | ID            | SIZE | ES        | NES       | NOM.p.val | FDR.q.val | FWER.p.val |
|-----|---------------------------------------------------|---------------|------|-----------|-----------|-----------|-----------|------------|
| 600 | GOBP-ORGANOPHOSPHATE-METABOLIC-PROCESS            | GO-0019637    | 8    | -0.511421 | -1.161778 | 0.268012  | 1.000000  | 1.000      |
| 601 | GOBP-POSITIVE-REGULATION-OF-PHOSPHORUS-METABOL... | GO-0010562    | 23   | -0.402624 | -1.164539 | 0.259446  | 1.000000  | 1.000      |
| 602 | GOBP-POSITIVE-REGULATION-OF-PROTEIN-MODIFICATI... | GO-0031401    | 22   | -0.409086 | -1.173057 | 0.242967  | 0.998342  | 1.000      |
| 603 | GOBP-ADENYLATE-CYCLASE-INHIBITING-G-PROTEIN.CO... | GO-0007196    | 5    | -0.596236 | -1.173152 | 0.261725  | 1.000000  | 1.000      |
| 604 | GOBP-PROTEIN-PHOSPHORYLATION                      | GO-0006468    | 33   | -0.381901 | -1.173586 | 0.258724  | 1.000000  | 1.000      |
| 605 | GOBP-MAPK-CASCADE                                 | GO-0000165    | 18   | -0.423257 | -1.174522 | 0.242063  | 1.000000  | 1.000      |
| 606 | GOBP-RESPONSE-TO-LIPID                            | GO-0033993    | 19   | -0.424141 | -1.174553 | 0.255629  | 1.000000  | 1.000      |
| 607 | GOBP-NEGATIVE-REGULATION-OF-ION-TRANSPORT         | GO-0043271    | 11   | -0.473346 | -1.176737 | 0.266943  | 1.000000  | 1.000      |
| 608 | GOBP-CELLULAR-RESPONSE-TO-LIPID                   | GO-0071396    | 15   | -0.451852 | -1.178217 | 0.256831  | 1.000000  | 1.000      |
| 609 | GOBP-ORGANONITROGEN-COMPOUND-CATABOLIC-PROCESS    | GO-1901565    | 10   | -0.493211 | -1.179490 | 0.264069  | 1.000000  | 1.000      |
| 610 | GOBP-CATION-TRANSPORT                             | GO-0006812    | 25   | -0.405597 | -1.181299 | 0.232617  | 1.000000  | 1.000      |
| 611 | GOBP-REGULATION-OF-HORMONE-SECRETION              | GO-0046883    | 8    | -0.525095 | -1.182016 | 0.266176  | 1.000000  | 1.000      |
| 612 | GOBP-CIRCULATORY-SYSTEM-PROCESS                   | GO-0003013    | 5    | -0.609112 | -1.182520 | 0.233129  | 1.000000  | 1.000      |
| 613 | GOBP-SENSORY-PERCEPTION-OF-PAIN                   | GO-0019233    | 5    | -0.608226 | -1.183996 | 0.242326  | 1.000000  | 1.000      |
| 614 | GOBP-POSITIVE-REGULATION-OF-PROTEIN-PHOSPHORYL... | GO-0001934    | 22   | -0.409086 | -1.185452 | 0.256545  | 1.000000  | 1.000      |
| 615 | GOBP-PROTEIN-MODIFICATION-BY-SMALL-PROTEIN-CON... | GO-0032446    | 6    | -0.566924 | -1.186729 | 0.263077  | 1.000000  | 1.000      |
| 616 | GOBP-REGULATION-OF-ION-TRANSPORT                  | GO-0043269    | 36   | -0.381749 | -1.188255 | 0.223793  | 1.000000  | 1.000      |
| 617 | GOBP-HEAD-DEVELOPMENT                             | GO-0060322    | 23   | -0.415680 | -1.192305 | 0.218629  | 1.000000  | 1.000      |
| 618 | GOBP-RESPONSE-TO-ALKALOID                         | GO-0043279    | 5    | -0.608198 | -1.197047 | 0.265823  | 1.000000  | 1.000      |
| 619 | REACTOME-MAPK-FAMILY-SIGNALING-CASCADES           | R-RNO-5683057 | 12   | -0.473506 | -1.199269 | 0.240109  | 1.000000  | 1.000      |
| 620 | GOBP-COAGULATION                                  | GO-0050817    | 8    | -0.537222 | -1.201775 | 0.252252  | 1.000000  | 1.000      |
| 621 | GOBP-CELL-JUNCTION-ORGANIZATION                   | GO-0034330    | 19   | -0.433444 | -1.202164 | 0.238095  | 1.000000  | 1.000      |
| 622 | GOBP-LIPID-LOCALIZATION                           | GO-0010876    | 10   | -0.496916 | -1.210198 | 0.233658  | 1.000000  | 1.000      |
| 623 | GOBP-CATION-TRANSMEMBRANE-TRANSPORT               | GO-0098655    | 18   | -0.441926 | -1.215516 | 0.208820  | 1.000000  | 1.000      |
| 624 | GOBP-NUCLEOBASE-CONTAINING-SMALL-MOLECULE-META... | GO-0055086    | 7    | -0.566276 | -1.216265 | 0.220264  | 1.000000  | 1.000      |
| 625 | GOBP-CELLULAR-MACROMOLECULE-CATABOLIC-PROCESS     | GO-0044265    | 5    | -0.615464 | -1.220344 | 0.218989  | 1.000000  | 1.000      |
| 626 | GOBP-PEPTIDE-HORMONE-SECRETION                    | GO-0030072    | 7    | -0.570427 | -1.220394 | 0.209270  | 1.000000  | 1.000      |
| 627 | GOBP-EMBRYONIC-MORPHOGENESIS                      | GO-0048598    | 6    | -0.596193 | -1.222666 | 0.227474  | 1.000000  | 1.000      |
| 628 | GOBP-PEPTIDYL-SERINE-MODIFICATION                 | GO-0018209    | 12   | -0.475743 | -1.225924 | 0.206704  | 1.000000  | 1.000      |
| 629 | GOBP-MULTICELLULAR-ORGANISMAL-RESPONSE-TO-STRESS  | GO-0033555    | 5    | -0.626071 | -1.228291 | 0.225460  | 1.000000  | 1.000      |
| 630 | REACTOME-INTEGRATION-OF-ENERGY-METABOLISM         | R-RNO-163685  | 5    | -0.627115 | -1.233136 | 0.214734  | 0.994959  | 1.000      |
| 631 | REACTOME-INTRACELLULAR-SIGNALING-BY-SECOND-MES... | R-RNO-9006925 | 15   | -0.460083 | -1.234268 | 0.216359  | 1.000000  | 1.000      |
| 632 | GOBP-REGULATION-OF-SYNAPTIC-PLASTICITY            | GO-0048167    | 21   | -0.432408 | -1.237526 | 0.193838  | 0.995584  | 1.000      |
| 633 | GOBP-NEGATIVE-REGULATION-OF-ANION-TRANSPORT       | GO-1903792    | 8    | -0.547765 | -1.240107 | 0.208999  | 0.994575  | 1.000      |
| 634 | GOBP-ORGANIC-HYDROXY-COMPOUND-TRANSPORT           | GO-0015850    | 6    | -0.598071 | -1.241865 | 0.214286  | 0.997390  | 1.000      |
| 635 | GOBP-INSULIN-SECRETION                            | GO-0030073    | 7    | -0.570427 | -1.248338 | 0.220060  | 0.978718  | 1.000      |
| 636 | GOBP-G-PROTEIN-COUPLED-GLUTAMATE-RECEPTOR-SIGN... | GO-0007216    | 8    | -0.555863 | -1.252400 | 0.206490  | 0.970793  | 1.000      |
| 637 | GOBP-POSITIVE-REGULATION-OF-PROTEIN-METABOLIC...  | GO-0051247    | 27   | -0.423352 | -1.253732 | 0.179975  | 0.975219  | 1.000      |
| 638 | GOBP-PROTEIN-LOCALIZATION-TO-POSTSYNAPSE          | GO-0062237    | 5    | -0.643746 | -1.257259 | 0.176744  | 0.969323  | 1.000      |
| 639 | GOBP-LIPID-EXPORT-FROM-CELL                       | GO-0140353    | 5    | -0.635321 | -1.258486 | 0.181269  | 0.974921  | 1.000      |
| 640 | GOBP-PROTEIN-LOCALIZATION-TO-SYNAPSE              | GO-0035418    | 5    | -0.643746 | -1.259984 | 0.176378  | 0.979005  | 1.000      |
| 641 | REACTOME-G-ALPHA-Q-SIGNALING-EVENTS               | R-RNO-416476  | 6    | -0.603556 | -1.262308 | 0.178306  | 0.979645  | 1.000      |
| 642 | REACTOME-GPCR-LIGAND-BINDING                      | R-RNO-500792  | 8    | -0.565828 | -1.262332 | 0.193922  | 0.991306  | 1.000      |

Continuation of Table S9

| NAME                                                   | ID            | SIZE | ES        | NES       | NOM.p.val | FDR.q.val | FWER.p.val |
|--------------------------------------------------------|---------------|------|-----------|-----------|-----------|-----------|------------|
| 643 GOBP-REGULATION-OF-NEURONAL-SYNAPTIC-PLASTICITY    | GO-0048168    | 7    | -0.585449 | -1.263048 | 0.197309  | 0.999959  | 1.000      |
| 644 GOBP-REGULATION-OF-SYSTEM-PROCESS                  | GO-0044057    | 18   | -0.463942 | -1.265682 | 0.186577  | 0.999555  | 1.000      |
| 645 GOBP-CHROMATIN-ORGANIZATION                        | GO-0006325    | 5    | -0.654717 | -1.266646 | 0.163666  | 1.000000  | 1.000      |
| 646 GOBP-ADENYLATE-CYCLASE-INHIBITING-G-PROTEIN.CO...  | GO-0007193    | 9    | -0.546766 | -1.268443 | 0.180115  | 1.000000  | 1.000      |
| 647 GOBP-REGULATION-OF-MEMBRANE-POTENTIAL              | GO-0042391    | 17   | -0.461381 | -1.273254 | 0.169935  | 0.999643  | 1.000      |
| 648 GOBP-VESICLE-MEDIATED-TRANSPORT-IN-SYNAPSE         | GO-0099003    | 7    | -0.591483 | -1.273622 | 0.173333  | 1.000000  | 1.000      |
| 649 GOBP-EXCITATORY-CHEMICAL-SYNAPTIC-TRANSMISSION     | GO-0098976    | 5    | -0.662498 | -1.278628 | 0.158805  | 0.999542  | 1.000      |
| 650 GOBP-REGULATION-OF-METAL-ION-TRANSPORT             | GO-0010959    | 6    | -0.619213 | -1.284928 | 0.143279  | 0.980427  | 1.000      |
| 651 GOBP-CELLULAR-RESPONSE-TO-HORMONE-STIMULUS         | GO-0032870    | 11   | -0.525615 | -1.291158 | 0.161517  | 0.962047  | 1.000      |
| 652 GOBP-POSITIVE-REGULATION-OF-CATALYTIC-ACTIVITY     | GO-0043085    | 29   | -0.423040 | -1.295109 | 0.156627  | 0.955319  | 1.000      |
| 653 GOBP-REGULATION-OF-VESICLE-MEDIATED-TRANSPORT      | GO-0060627    | 12   | -0.504986 | -1.296152 | 0.157447  | 0.963406  | 1.000      |
| 654 REACTOME-SIGNALING-BY-WNT                          | R-RNO-195721  | 7    | -0.602468 | -1.298483 | 0.152012  | 0.965032  | 1.000      |
| 655 GOBP-PLATELET-ACTIVATION                           | GO-0030168    | 6    | -0.616553 | -1.299624 | 0.172107  | 0.972347  | 1.000      |
| 656 GOBP-REGULATION-OF-TRANS-SYNAPTIC-SIGNALING        | GO-0099177    | 40   | -0.415125 | -1.301278 | 0.135553  | 0.978024  | 1.000      |
| 657 GOBP-INTRACELLULAR-RECEPTOR-SIGNALING-PATHWAY      | GO-0030522    | 5    | -0.670527 | -1.315061 | 0.137405  | 0.920358  | 1.000      |
| 658 REACTOME-OPIOID-SIGNALING                          | R-RNO-111885  | 12   | -0.532007 | -1.317205 | 0.126918  | 0.923636  | 1.000      |
| 659 REACTOME-RAS-ACTIVATION-UPON-CA2-INFLUX-THROUGH... | R-HSA-442982  | 6    | -0.645104 | -1.324186 | 0.131268  | 0.901819  | 1.000      |
| 660 GOBP-REGULATION-OF-POSTSYNAPTIC-MEMBRANE-POTEN...  | GO-0060078    | 14   | -0.507939 | -1.327337 | 0.114325  | 0.899018  | 1.000      |
| 661 GOBP-CELLULAR-RESPONSE-TO-PEPTIDE-HORMONE-STIM...  | GO-0071375    | 9    | -0.579505 | -1.338287 | 0.131657  | 0.856880  | 1.000      |
| 662 REACTOME-CREB1-PHOSPHORYLATION-THROUGH-NMDA-RE...  | R-RNO-442742  | 8    | -0.653605 | -1.351515 | 0.104956  | 0.842773  | 1.000      |
| 663 GOBP-PURINE-CONTAINING-COMPOUND-METABOLIC-PROCESS  | GO-0072521    | 6    | -0.653605 | -1.351515 | 0.122137  | 0.817701  | 1.000      |
| 664 REACTOME-TRAFFICKING-OF-GLUR2-CONTAINING-AMPA...   | R-RNO-416993  | 8    | -0.597618 | -1.356767 | 0.120664  | 0.805597  | 1.000      |
| 665 GOBP-ADENYLATE-CYCLASE-MODULATING-G-PROTEIN.CO...  | GO-0007188    | 11   | -0.551606 | -1.360440 | 0.111888  | 0.802109  | 1.000      |
| 666 GOBP-REGULATION-OF-CIRCADIAN-RHYTHM                | GO-0042752    | 7    | -0.632489 | -1.364290 | 0.104046  | 0.796824  | 1.000      |
| 667 GOBP-ION-HOMEOSTASIS                               | GO-0050801    | 16   | -0.509467 | -1.365541 | 0.093878  | 0.804584  | 1.000      |
| 668 REACTOME-CLASS-C-3-METABOTROPIC-GLUTAMATE-PHER...  | R-RNO-420499  | 7    | -0.623198 | -1.367355 | 0.110764  | 0.809659  | 1.000      |
| 669 GOBP-MUSCLE-CONTRACTION                            | GO-0006936    | 5    | -0.702607 | -1.368364 | 0.084375  | 0.819200  | 1.000      |
| 670 GOBP-REGULATION-OF-TRANSPORT                       | GO-0051049    | 44   | -0.442158 | -1.376852 | 0.075904  | 0.790028  | 1.000      |
| 671 GOBP-HORMONE-TRANSPORT                             | GO-0009914    | 9    | -0.589728 | -1.392303 | 0.094767  | 0.730630  | 1.000      |
| 672 GOBP-REGULATION-OF-CELLULAR-COMPONENT-BIOGENESIS   | GO-0044087    | 10   | -0.577488 | -1.398875 | 0.098870  | 0.723042  | 1.000      |
| 673 GOBP-HOMEOSTATIC-PROCESS                           | GO-0042592    | 31   | -0.452616 | -1.399601 | 0.073885  | 0.722983  | 1.000      |
| 674 GOBP-REGULATION-OF-BODY-FLUID-LEVELS               | GO-0050878    | 11   | -0.576377 | -1.403685 | 0.088359  | 0.716437  | 1.000      |
| 675 GOBP-SECOND-MESSENGER-MEDIATED-SIGNALING           | GO-0019932    | 16   | -0.532514 | -1.407098 | 0.067024  | 0.714960  | 1.000      |
| 676 GOBP-NEUROTRANSMITTER-SECRETION                    | GO-0007269    | 6    | -0.692969 | -1.408347 | 0.061444  | 0.723541  | 1.000      |
| 677 GOBP-ORGANOPHOSPHATE-BIOSYNTHETIC-PROCESS          | GO-0090407    | 5    | -0.738159 | -1.410495 | 0.061285  | 0.728433  | 1.000      |
| 678 GOBP-METAL-ION-HOMEOSTASIS                         | GO-0055065    | 14   | -0.543855 | -1.416322 | 0.078838  | 0.716275  | 1.000      |
| 679 GOBP-PEPTIDYL-LYSINE-MODIFICATION                  | GO-0018205    | 5    | -0.718611 | -1.425978 | 0.073244  | 0.684926  | 1.000      |
| 680 GOBP-IONOTROPIC-GLUTAMATE-RECEPTOR-SIGNALING_P...  | GO-0035235    | 9    | -0.615662 | -1.428699 | 0.059002  | 0.687587  | 1.000      |
| 681 GOBP-CALCIUM-ION-TRANSPORT-INTO-CYTOSOL            | GO-0060402    | 7    | -0.654230 | -1.429260 | 0.064897  | 0.701224  | 1.000      |
| 682 GOBP-CYTOSOLIC-CALCIUM-ION-TRANSPORT               | GO-0060401    | 7    | -0.654230 | -1.432536 | 0.061285  | 0.701606  | 1.000      |
| 683 GOBP-MUSCLE-SYSTEM-PROCESS                         | GO-0003012    | 9    | -0.598543 | -1.433077 | 0.089021  | 0.715980  | 1.000      |
| 684 REACTOME-SYNAPTIC-ADHESION-LIKE-MOLECULES          | R-RNO-8849932 | 9    | -0.617106 | -1.445398 | 0.066572  | 0.672724  | 1.000      |
| 685 GOBP-CALCIUM-ION-TRANSMEMBRANE-TRANSPORT           | GO-0070588    | 7    | -0.654230 | -1.449090 | 0.077485  | 0.671131  | 1.000      |

Continuation of Table S9

| NAME | ID                                                 | SIZE | ES        | NES       | NOM.p.val | FDR.q.val | FWER.p.val |
|------|----------------------------------------------------|------|-----------|-----------|-----------|-----------|------------|
| 686  | GOBP-NUCLEOSIDE-PHOSPHATE-BIOSYNTHETIC-PROCESS     | 5    | -0.738159 | -1.454672 | 0.056162  | 0.661038  | 1.000      |
| 687  | GOBP-NEGATIVE-REGULATION-OF-TRANSPORT              | 13   | -0.571344 | -1.456044 | 0.061141  | 0.672112  | 1.000      |
| 688  | REACTOME-G-ALPHA-1-SIGNALING-EVENTS                | 18   | -0.528796 | -1.457380 | 0.055851  | 0.683992  | 1.000      |
| 689  | GOBP-REGULATION-OF-MUSCLE-SYSTEM-PROCESS           | 8    | -0.659383 | -1.466323 | 0.049080  | 0.659484  | 1.000      |
| 690  | REACTOME-ASSEMBLY-AND-CELL-SURFACE-PRESENTATION... | 8    | -0.653444 | -1.470223 | 0.042773  | 0.658543  | 1.000      |
| 691  | REACTOME-NEGATIVE-REGULATION-OF-NMDA-RECEPTOR...   | 8    | -0.653444 | -1.477888 | 0.054492  | 0.640059  | 1.000      |
| 692  | REACTOME-TRANSCRIPTIONAL-REGULATION-BY-MBCP2       | 7    | -0.688166 | -1.488674 | 0.041667  | 0.605990  | 1.000      |
| 693  | GOBP-INORGANIC-ION-TRANSMEMBRANE-TRANSPORT         | 9    | -0.643190 | -1.505724 | 0.050279  | 0.547194  | 1.000      |
| 694  | REACTOME-SIGNALING-BY-GPCR                         | 22   | -0.524598 | -1.525836 | 0.024516  | 0.480743  | 1.000      |
| 695  | GOBP-SYNAPTIC-SIGNALING                            | 47   | -0.478985 | -1.532798 | 0.028674  | 0.468244  | 1.000      |
| 696  | REACTOME-G-PROTEIN-MEDIATED-EVENTS                 | 9    | -0.654350 | -1.538890 | 0.036711  | 0.457880  | 1.000      |
| 697  | GOBP-SENSORY-PERCEPTION                            | 9    | -0.667809 | -1.547433 | 0.036550  | 0.441207  | 1.000      |
| 698  | GOBP-REGULATION-OF-CYTOSOLIC-CALCIUM-ION-CONCE...  | 13   | -0.602256 | -1.554651 | 0.020690  | 0.430099  | 1.000      |
| 699  | REACTOME-LONG-TERM-POTENTIATION                    | 10   | -0.648852 | -1.556433 | 0.035813  | 0.439858  | 1.000      |
| 700  | GOBP-DIVALENT-INORGANIC-CATION-HOMEOSTASIS         | 13   | -0.602256 | -1.557471 | 0.030997  | 0.453915  | 1.000      |
| 701  | GOBP-NEUROTRANSMITTER-TRANSPORT                    | 7    | -0.722645 | -1.560969 | 0.029586  | 0.458920  | 1.000      |
| 702  | GOBP-REGULATION-OF-NEUROTRANSMITTER-LEVELS         | 10   | -0.722645 | -1.562921 | 0.025148  | 0.471327  | 1.000      |
| 703  | REACTOME-TRAFICKING-OF-AMPA-RECEPTORS              | 11   | -0.643234 | -1.569108 | 0.027816  | 0.465570  | 1.000      |
| 704  | GOBP-CHEMICAL-HOMEOSTASIS                          | 23   | -0.542770 | -1.583397 | 0.017903  | 0.427749  | 1.000      |
| 705  | REACTOME-CA-DEPENDENT-EVENTS                       | 8    | -0.699311 | -1.586428 | 0.023460  | 0.435859  | 1.000      |
| 706  | REACTOME-UNBLOCKING-OF-NMDA-RECEPTORS-GLUTAMAT...  | 12   | -0.617424 | -1.590209 | 0.024291  | 0.441943  | 1.000      |
| 707  | GOBP-CELLULAR-ION-HOMEOSTASIS                      | 14   | -0.615715 | -1.595216 | 0.018945  | 0.445566  | 1.000      |
| 708  | REACTOME-NEUREXINS-AND-NEUROLIGINS                 | 9    | -0.683473 | -1.599594 | 0.029155  | 0.452451  | 1.000      |
| 709  | REACTOME-BETA-CATENIN-INDEPENDENT-WNT-SIGNALING    | 5    | -0.807129 | -1.608761 | 0.010654  | 0.441505  | 0.999      |
| 710  | REACTOME-ACTIVATION-OF-NMDA-RECEPTORS-AND-POST...  | 16   | -0.591208 | -1.610997 | 0.017663  | 0.460898  | 0.999      |
| 711  | REACTOME-DAG-AND-JP3-SIGNALING                     | 8    | -0.716803 | -1.620917 | 0.012968  | 0.449983  | 0.998      |
| 712  | GOBP-REGULATION-OF-SECRETION                       | 14   | -0.618539 | -1.622892 | 0.024324  | 0.474336  | 0.997      |
| 713  | GOBP-CELL-CELL-SIGNALING                           | 56   | -0.522178 | -1.626755 | 0.007084  | 0.493022  | 0.997      |
| 714  | GOBP-METAL-ION-TRANSPORT                           | 11   | -0.660112 | -1.631975 | 0.020776  | 0.510406  | 0.997      |
| 715  | REACTOME-PROTEIN-PROTEIN-INTERACTIONS-AT-SYNAPSES  | 12   | -0.646596 | -1.632099 | 0.009472  | 0.560541  | 0.997      |
| 716  | GOBP-CALCIUM-ION-TRANSPORT                         | 11   | -0.660112 | -1.644212 | 0.014045  | 0.550322  | 0.995      |
| 717  | REACTOME-G-ALPHA-Z-SIGNALING-EVENTS                | 5    | -0.845055 | -1.661861 | 0.004710  | 0.514802  | 0.991      |
| 718  | REACTOME-NEUROTRANSMITTER-RECEPTORS-AND-POSTSY...  | 22   | -0.585312 | -1.672455 | 0.009162  | 0.528034  | 0.984      |
| 719  | GOBP-GLUTAMATE-RECEPTOR-SIGNALING-PATHWAY          | 17   | -0.611666 | -1.695879 | 0.014249  | 0.478738  | 0.960      |
| 720  | GOBP-REGULATION-OF-NEUROTRANSMITTER-TRANSPORT      | 6    | -0.825433 | -1.708039 | 0.001490  | 0.506180  | 0.940      |
| 721  | GOBP-CELLULAR-HOMEOSTASIS                          | 18   | -0.637441 | -1.758646 | 0.003953  | 0.345479  | 0.772      |
| 722  | REACTOME-TRANSMISSION-ACROSS-CHEMICAL-SYNAPSES     | 23   | -0.608925 | -1.767434 | 0.001342  | 0.412871  | 0.737      |
| 723  | GOBP-SIGNAL-RELEASE                                | 14   | -0.677178 | -1.799338 | 0.004065  | 0.417682  | 0.595      |
| 724  | REACTOME-NEURONAL-SYSTEM                           | 26   | -0.634937 | -1.884670 | 0.000000  | 0.252430  | 0.240      |

End of Table

**Supplementary Table S10:** SC cervical segment late profile Profile (45 DPL peak) GSEA results.

| Begin of Table S10 |                                                   |               |      |          |          |           |           |            |
|--------------------|---------------------------------------------------|---------------|------|----------|----------|-----------|-----------|------------|
|                    | NAME                                              | ID            | SIZE | ES       | NES      | NOM.p.val | FDR.q.val | FWER.p.val |
| 0                  | REACTOME_G-PROTEIN-MEDIATED_EVENTS                | R-RNO-112040  | 9    | 0.594937 | 2.096231 | 0.005464  | 0.321229  | 0.273      |
| 1                  | REACTOME_DAG-AND_IP3-SIGNALING                    | R-RNO-1489509 | 8    | 0.587500 | 2.038604 | 0.000000  | 0.240319  | 0.379      |
| 2                  | GOBP-NEUROINFLAMMATORY_RESPONSE                   | GO-0150076    | 5    | 0.746988 | 1.986881 | 0.000000  | 0.217888  | 0.478      |
| 3                  | REACTOME_CA-DEPENDENT_EVENTS                      | R-RNO-111996  | 8    | 0.587500 | 1.932299 | 0.005405  | 0.231253  | 0.603      |
| 4                  | GOBP_POSITIVE-REGULATION_OF_ESTABLISHMENT_OF_P... | GO-1904951    | 5    | 0.698795 | 1.873576 | 0.008032  | 0.253591  | 0.714      |
| 5                  | REACTOME_G_ALPHA_I-SIGNALING_EVENTS               | R-RNO-418594  | 18   | 0.371429 | 1.802278 | 0.000000  | 0.308596  | 0.838      |
| 6                  | REACTOME_G_ALPHA_Z-SIGNALING_EVENTS               | R-RNO-418597  | 5    | 0.590361 | 1.571350 | 0.027778  | 0.845724  | 0.998      |
| 7                  | REACTOME_ANTILINFLAMMATORY_RESPONSE_FAVOURING...  | R-HSA-9662851 | 5    | 0.566265 | 1.558593 | 0.024691  | 0.788925  | 0.999      |
| 8                  | GOBP_VESICLE-MEDIATED_TRANSPORT_IN_SYNAPSE        | GO-0099003    | 7    | 0.469136 | 1.483705 | 0.070270  | 0.980450  | 1.000      |
| 9                  | GOBP_ORGANOPHOSPHATE-BIOSYNTHETIC-PROCESS         | GO-0090407    | 5    | 0.542169 | 1.436462 | 0.086066  | 1.000000  | 1.000      |
| 10                 | GOBP-REGULATION-OF-NEUROTRANSMITTER_TRANSPORT     | GO-0051588    | 6    | 0.493152 | 1.423565 | 0.102326  | 1.000000  | 1.000      |
| 11                 | GOBP_NUCLEOSIDE-PHOSPHATE-BIOSYNTHETIC-PROCESS    | GO-1901293    | 5    | 0.542169 | 1.423515 | 0.080645  | 0.945016  | 1.000      |
| 12                 | GOBP-REGULATION-OF-SECRETION                      | GO-0051046    | 14   | 0.324324 | 1.407917 | 0.083333  | 0.930927  | 1.000      |
| 13                 | REACTOME_OPIOID-SIGNALING                         | R-RNO-111885  | 12   | 0.342105 | 1.397053 | 0.130769  | 0.904115  | 1.000      |
| 14                 | GOBP-SIGNAL-RELEASE                               | GO-0023061    | 14   | 0.324324 | 1.351769 | 0.120567  | 1.000000  | 1.000      |
| 15                 | GOBP-RESPONSE-TO-HEAT                             | GO-0009408    | 7    | 0.425440 | 1.335581 | 0.124378  | 1.000000  | 1.000      |
| 16                 | REACTOME-TRAFFICKING-OF_AMPA-RECEPTORS            | R-RNO-399719  | 11   | 0.345258 | 1.332677 | 0.123188  | 0.974669  | 1.000      |
| 17                 | GOBP-REGULATION-OF-CELLULAR-RESPONSE-TO-STRESS    | GO-0080135    | 9    | 0.386593 | 1.329130 | 0.160221  | 0.933027  | 1.000      |
| 18                 | GOBP-RESPONSE-TO-TEMPERATURE-STIMULUS             | GO-0009266    | 9    | 0.370397 | 1.327962 | 0.147929  | 0.887156  | 1.000      |
| 19                 | GOBP_POSITIVE-REGULATION-OF-SECRETION             | GO-0051047    | 6    | 0.463415 | 1.304201 | 0.133028  | 0.927399  | 1.000      |
| 20                 | GOBP-REGULATION-OF-VESICLE-MEDIATED_TRANSPORT     | GO-0060627    | 12   | 0.315789 | 1.275096 | 0.164179  | 0.989246  | 1.000      |
| 21                 | HALLMARK_ALLOGRAFT-REJECTION                      | M5950         | 7    | 0.399785 | 1.241317 | 0.169591  | 1.000000  | 1.000      |
| 22                 | GOBP_POSITIVE-REGULATION-OF_ORGANELLE-ORGANIZA... | GO-0010638    | 10   | 0.330788 | 1.233393 | 0.194805  | 1.000000  | 1.000      |
| 23                 | REACTOME_INTERFERON-SIGNALING                     | R-RNO-913531  | 6    | 0.419293 | 1.219348 | 0.171806  | 1.000000  | 1.000      |
| 24                 | GOBP_ORGANOPHOSPHATE-METABOLIC-PROCESS            | GO-0019637    | 8    | 0.362500 | 1.212824 | 0.210811  | 1.000000  | 1.000      |
| 25                 | REACTOME_TRANSCRIPTIONAL-REGULATION_BY_MECP2      | R-RNO-8986944 | 7    | 0.370370 | 1.166843 | 0.235577  | 1.000000  | 1.000      |
| 26                 | GOBP-REGULATION-OF-METAL-ION-TRANSPORT            | GO-0010959    | 6    | 0.396546 | 1.164011 | 0.219298  | 1.000000  | 1.000      |
| 27                 | REACTOME_NEURONAL-SYSTEM                          | R-RNO-112316  | 26   | 0.225807 | 1.154877 | 0.212121  | 1.000000  | 1.000      |
| 28                 | GOBP-ADENYLATE-CYCLASE-MODULATING-G-PROTEIN_CO... | GO-0007188    | 11   | 0.303015 | 1.153771 | 0.245399  | 1.000000  | 1.000      |
| 29                 | REACTOME_ONCOGENIC_MAPK-SIGNALING                 | R-HSA-6802957 | 5    | 0.434005 | 1.145050 | 0.270161  | 1.000000  | 1.000      |
| 30                 | REACTOME_TRANSMISSION-ACROSS-CHEMICAL-SYNAPSES    | R-RNO-112315  | 23   | 0.215385 | 1.14123  | 0.259740  | 1.000000  | 1.000      |
| 31                 | GOBP-REGULATION-OF-PEPTIDE-TRANSPORT              | GO-0090087    | 10   | 0.307692 | 1.123151 | 0.290323  | 1.000000  | 1.000      |
| 32                 | GOBP-EXOCYTOSIS                                   | GO-0006887    | 11   | 0.286390 | 1.120433 | 0.290541  | 1.000000  | 1.000      |
| 33                 | GOBP-NEUROTRANSMITTER_TRANSPORT                   | GO-0006836    | 7    | 0.345679 | 1.119814 | 0.301435  | 1.000000  | 1.000      |
| 34                 | REACTOME-NEUROTRANSMITTER-RECEPTORS-AND_POSTSY... | R-RNO-112314  | 22   | 0.212121 | 1.110935 | 0.319149  | 1.000000  | 1.000      |
| 35                 | GOBP-REGULATION-OF_ORGANELLE-ORGANIZATION         | GO-0033043    | 14   | 0.250672 | 1.100765 | 0.290323  | 1.000000  | 1.000      |
| 36                 | GOBP-ESTABLISHMENT-OF-PROTEIN-LOCALIZATION        | GO-0045184    | 17   | 0.229661 | 1.097540 | 0.299065  | 1.000000  | 1.000      |
| 37                 | GOBP_SECRETION                                    | GO-0046903    | 24   | 0.206223 | 1.094243 | 0.300000  | 1.000000  | 1.000      |
| 38                 | GOBP_POSITIVE-REGULATION-OF_APOPTOTIC-SIGNALIN... | GO-2001235    | 5    | 0.421687 | 1.093242 | 0.291188  | 1.000000  | 1.000      |
| 39                 | GOBP_POSITIVE-REGULATION-OF-TRANSPORT             | GO-0051050    | 26   | 0.209677 | 1.089743 | 0.370370  | 1.000000  | 1.000      |
| 40                 | GOBP-REGULATION-OF-NEURON-DIFFERENTIATION         | GO-0045664    | 5    | 0.433735 | 1.089111 | 0.327189  | 1.000000  | 1.000      |

Continuation of Table S10

| NAME | ID                                                | SIZE | ES       | NES      | NOM.p.val | FDR.q.val | FWER.p.val |
|------|---------------------------------------------------|------|----------|----------|-----------|-----------|------------|
| 41   | GOBP-REGULATION-OF-TRANS-SYNAPTIC-SIGNALING       | 40   | 0.171324 | 1.083724 | 0.291667  | 0.999037  | 1.000      |
| 42   | GOBP-NUCLEOBASE-CONTAINING-SMALL-MOLECULE-META... | 7    | 0.358025 | 1.082304 | 0.339207  | 0.980425  | 1.000      |
| 43   | GOBP-HORMONE-TRANSPORT                            | 9    | 0.303797 | 1.076570 | 0.318182  | 0.977801  | 1.000      |
| 44   | GOBP-REGULATION-OF-NEUROTRANSMITTER-LEVELS        | 7    | 0.345679 | 1.056221 | 0.339806  | 1.000000  | 1.000      |
| 45   | GOBP-POSITIVE-REGULATION-OF-PEPTIDYL-TYROSINE-... | 8    | 0.316544 | 1.053905 | 0.378238  | 1.000000  | 1.000      |
| 46   | GOBP-PEPTIDE-SECRETION                            | 9    | 0.303797 | 1.036609 | 0.370166  | 1.000000  | 1.000      |
| 47   | REACTOME-BETA-CATENIN-INDEPENDENT-WNT-SIGNALING   | 5    | 0.385542 | 1.036576 | 0.333333  | 1.000000  | 1.000      |
| 48   | GOBP-PURINE-CONTAINING-COMPOUND-METABOLIC-PROCESS | 6    | 0.353659 | 1.004120 | 0.393939  | 1.000000  | 1.000      |
| 49   | GOBP-ENDOCYTOSIS                                  | 8    | 0.300000 | 0.998122 | 0.417526  | 1.000000  | 1.000      |
| 50   | GOBP-MULTICELLULAR-ORGANISMAL-RESPONSE-TO-STRESS  | 5    | 0.385542 | 0.991290 | 0.460000  | 1.000000  | 1.000      |
| 51   | GOBP-NEUROTRANSMITTER-SECRETION                   | 6    | 0.341463 | 0.973863 | 0.480952  | 1.000000  | 1.000      |
| 52   | GOBP-ENDOTHELIAL-CELL-PROLIFERATION               | 8    | 0.288864 | 0.961263 | 0.448649  | 1.000000  | 1.000      |
| 53   | GOBP-REGULATION-OF-HORMONE-SECRETION              | 8    | 0.300000 | 0.955914 | 0.477273  | 1.000000  | 1.000      |
| 54   | GOBP-REGULATION-OF-HEMOPOIESIS                    | 10   | 0.256410 | 0.937107 | 0.486667  | 1.000000  | 1.000      |
| 55   | GOBP-PEPTIDE-HORMONE-SECRETION                    | 7    | 0.296296 | 0.933504 | 0.507614  | 1.000000  | 1.000      |
| 56   | GOBP-INSULIN-SECRETION                            | 7    | 0.296296 | 0.932732 | 0.547619  | 1.000000  | 1.000      |
| 57   | REACTOME-PLATELET-ACTIVATION-SIGNALING-AND-AGG... | 7    | 0.295410 | 0.932564 | 0.518518  | 1.000000  | 1.000      |
| 58   | GOBP-CELL-CELL-SIGNALING                          | 56   | 0.161374 | 0.929590 | 0.600000  | 1.000000  | 1.000      |
| 59   | GOBP-REGULATION-OF-ION-TRANSPORT                  | 36   | 0.161557 | 0.923654 | 0.531915  | 1.000000  | 1.000      |
| 60   | GOBP-POSITIVE-REGULATION-OF-BINDING               | 6    | 0.317073 | 0.915520 | 0.539535  | 1.000000  | 1.000      |
| 61   | GOBP-ADENYLATE-CYCLASE-INHIBITING-G-PROTEIN.CO... | 5    | 0.337349 | 0.912058 | 0.583333  | 1.000000  | 1.000      |
| 62   | REACTOME-GPCR-LIGAND-BINDING                      | 8    | 0.275000 | 0.908907 | 0.497238  | 1.000000  | 1.000      |
| 63   | GOBP-REGULATION-OF-PEPTIDE-SECRETION              | 7    | 0.296296 | 0.906814 | 0.511737  | 1.000000  | 1.000      |
| 64   | GOBP-MEMORY                                       | 13   | 0.208661 | 0.887545 | 0.627586  | 1.000000  | 1.000      |
| 65   | REACTOME-RAS-ACTIVATION-UPON-CA2-INFLUX-THROUG... | 6    | 0.305898 | 0.885674 | 0.604348  | 1.000000  | 1.000      |
| 66   | GOBP-EPITHELIAL-CELL-PROLIFERATION                | 12   | 0.219438 | 0.880116 | 0.609589  | 1.000000  | 1.000      |
| 67   | GOBP-REGULATION-OF-PROTEIN-LOCALIZATION           | 18   | 0.185714 | 0.878188 | 0.616279  | 1.000000  | 1.000      |
| 68   | REACTOME-ACTIVATION-OF-NMDA-RECEPTORS-AND-POST... | 16   | 0.194444 | 0.872191 | 0.610000  | 1.000000  | 1.000      |
| 69   | GOBP-REGULATION-OF-ENDOCYTOSIS                    | 6    | 0.292683 | 0.871289 | 0.594203  | 1.000000  | 1.000      |
| 70   | GOBP-ION-HOMEOSTASIS                              | 16   | 0.194444 | 0.869180 | 0.685714  | 1.000000  | 1.000      |
| 71   | GOBP-CELLULAR-RESPONSE-TO-ALCOHOL                 | 5    | 0.318657 | 0.868549 | 0.617886  | 1.000000  | 1.000      |
| 72   | GOBP-SYNAPTIC-TRANSMISSION-GLUTAMATERGIC          | 13   | 0.200000 | 0.866284 | 0.602941  | 1.000000  | 1.000      |
| 73   | GOBP-REGULATION-OF-PEPTIDE-HORMONE-SECRETION      | 6    | 0.292683 | 0.865101 | 0.649038  | 1.000000  | 1.000      |
| 74   | GOBP-RECEPTOR-MEDIATED-ENDOCYTOSIS                | 6    | 0.292683 | 0.856334 | 0.614679  | 1.000000  | 1.000      |
| 75   | GOBP-REGULATION-OF-TRANSPORT                      | 44   | 0.145711 | 0.855137 | 0.630435  | 1.000000  | 1.000      |
| 76   | REACTOME-CLASS-C-3-METABOTROPIC-GLUTAMATE-PHER... | 7    | 0.271605 | 0.853978 | 0.602151  | 1.000000  | 1.000      |
| 77   | GOBP-DENDRITE-DEVELOPMENT                         | 10   | 0.230769 | 0.847343 | 0.686391  | 1.000000  | 1.000      |
| 78   | REACTOME-CREB1-PHOSPHORYLATION-THROUGH-NMDA.RE... | 8    | 0.260203 | 0.841317 | 0.698413  | 1.000000  | 1.000      |
| 79   | GOBP-ADENYLATE-CYCLASE-INHIBITING-G-PROTEIN.CO... | 9    | 0.232374 | 0.834401 | 0.635870  | 1.000000  | 1.000      |
| 80   | GOBP-SYNAPTIC-SIGNALING                           | 47   | 0.141383 | 0.830334 | 0.660000  | 1.000000  | 1.000      |
| 81   | GOBP-PHAGOCYTOSIS                                 | 5    | 0.316199 | 0.820870 | 0.655303  | 1.000000  | 1.000      |
| 82   | GOBP-REGULATION-OF-VASCULAR-ASSOCIATED-SMOOTH...  | 5    | 0.313902 | 0.813714 | 0.712264  | 1.000000  | 1.000      |
| 83   | REACTOME-INTEGRATION-OF-ENERGY-METABOLISM         | 5    | 0.313253 | 0.811089 | 0.710526  | 1.000000  | 1.000      |



Continuation of Table S10

| NAME | ID                                                | SIZE | ES        | NES       | NOM.p.val | FDR.q.val | FWER.p.val |
|------|---------------------------------------------------|------|-----------|-----------|-----------|-----------|------------|
| 84   | GOBP-NEGATIVE-REGULATION-OF-CELL-DEVELOPMENT      | 6    | 0.276136  | 0.810615  | 0.695652  | 1.000000  | 1.000      |
| 85   | GOBP-NERVE-DEVELOPMENT                            | 9    | 0.227848  | 0.808345  | 0.751479  | 1.000000  | 1.000      |
| 86   | GOBP-AMEBOIDAL-TYPE-CELL-MIGRATION                | 11   | 0.211167  | 0.799571  | 0.722222  | 1.000000  | 1.000      |
| 87   | GOBP-REGULATION-OF-RECEPTOR-MEDIATED-ENDOCYTOSIS  | 5    | 0.289157  | 0.790245  | 0.761719  | 1.000000  | 1.000      |
| 88   | GOBP-REGULATION-OF-SYNAPTIC-TRANSMISSION-GLUTA... | 12   | 0.197366  | 0.788995  | 0.726619  | 1.000000  | 1.000      |
| 89   | GOBP-REGULATION-OF-CYTOSKELETON-ORGANIZATION      | 5    | 0.289157  | 0.785252  | 0.736111  | 1.000000  | 1.000      |
| 90   | GOBP-ACTIVATION-OF-MAPK-ACTIVITY                  | 6    | 0.268293  | 0.780053  | 0.795652  | 1.000000  | 1.000      |
| 91   | GOBP-POSITIVE-REGULATION-OF-EPITHELIAL-CELL-PR... | 7    | 0.265510  | 0.779788  | 0.729282  | 1.000000  | 1.000      |
| 92   | REACTOME-SIGNALING-BY-GPCR                        | 22   | 0.152712  | 0.777521  | 0.736842  | 1.000000  | 1.000      |
| 93   | GOBP-POSITIVE-REGULATION-OF-HEMOPOIESIS           | 7    | 0.246914  | 0.775330  | 0.799043  | 1.000000  | 1.000      |
| 94   | GOBP-RECEPTOR-METABOLIC-PROCESS                   | 5    | 0.289157  | 0.765591  | 0.735043  | 1.000000  | 1.000      |
| 95   | GOBP-PEPTIDYL-SERINE-MODIFICATION                 | 12   | 0.187444  | 0.764283  | 0.793333  | 1.000000  | 1.000      |
| 96   | GOBP-RECEPTOR-INTERNALIZATION                     | 5    | 0.289157  | 0.763128  | 0.765217  | 1.000000  | 1.000      |
| 97   | GOBP-POSITIVE-REGULATION-OF-MAP-KINASE-ACTIVITY   | 6    | 0.268293  | 0.761989  | 0.772947  | 1.000000  | 1.000      |
| 98   | GOBP-DEVELOPMENTAL-MATURATION                     | 5    | 0.289157  | 0.749860  | 0.807843  | 1.000000  | 1.000      |
| 99   | GOBP-REGULATION-OF-LONG-TERM-SYNAPTIC-POTENTIA... | 6    | 0.255273  | 0.739757  | 0.815789  | 1.000000  | 1.000      |
| 100  | GOBP-POSITIVE-REGULATION-OF-PHOSPHORUS-METABOL... | 23   | 0.138461  | 0.738561  | 0.782051  | 1.000000  | 1.000      |
| 250  | GOBP-CELL-PART-MORPHOGENESIS                      | 25   | -0.211248 | -0.787343 | 0.734914  | 0.936496  | 1.000      |
| 251  | GOBP-INFLAMMATORY-RESPONSE                        | 12   | -0.256564 | -0.790906 | 0.756912  | 0.932674  | 1.000      |
| 252  | GOBP-MYELOID-LEUKOCYTE-MEDIATED-IMMUNITY          | 6    | -0.317299 | -0.791671 | 0.734456  | 0.933406  | 1.000      |
| 253  | GOBP-RESPIRATORY-SYSTEM-DEVELOPMENT               | 6    | -0.314022 | -0.795203 | 0.726343  | 0.929373  | 1.000      |
| 254  | GOBP-REGULATION-OF-RESPONSE-TO-STRESS             | 19   | -0.227322 | -0.795848 | 0.726101  | 0.930325  | 1.000      |
| 255  | GOBP-FOREBRAIN-DEVELOPMENT                        | 10   | -0.269207 | -0.796760 | 0.719660  | 0.930763  | 1.000      |
| 256  | GOBP-CELL-ACTIVATION-INVOLVED-IN-IMMUNE-RESPONSE  | 6    | -0.317299 | -0.798268 | 0.721716  | 0.930253  | 1.000      |
| 257  | REACTOME-NEUTROPHIL-DEGRANULATION                 | 6    | -0.317299 | -0.799810 | 0.715013  | 0.929658  | 1.000      |
| 258  | GOBP-NEGATIVE-REGULATION-OF-APOPTOTIC-SIGNALIN... | 7    | -0.301710 | -0.800805 | 0.706853  | 0.929969  | 1.000      |
| 259  | GOBP-DENDRITE-MORPHOGENESIS                       | 7    | -0.300958 | -0.804229 | 0.742749  | 0.926290  | 1.000      |
| 260  | REACTOME-EXTRACELLULAR-MATRIX-ORGANIZATION        | 5    | -0.347501 | -0.813377 | 0.721536  | 0.913373  | 1.000      |
| 261  | GOBP-CELL-CELL-JUNCTION-ASSEMBLY                  | 5    | -0.343091 | -0.813501 | 0.669811  | 0.915160  | 1.000      |
| 262  | GOBP-BIOLOGICAL-PROCESS-INVOLVED-IN-SYMBIOTIC.... | 10   | -0.275517 | -0.816560 | 0.697006  | 0.912089  | 1.000      |
| 263  | GOBP-CELL-POPULATION-PROLIFERATION                | 32   | -0.214072 | -0.818989 | 0.698821  | 0.909805  | 1.000      |
| 264  | GOBP-REGULATION-OF-CELLULAR-PROTEIN-LOCALIZATION  | 12   | -0.265035 | -0.820628 | 0.689157  | 0.908940  | 1.000      |
| 265  | GOBP-REGULATION-OF-PROTEIN-PHOSPHORYLATION        | 25   | -0.225885 | -0.821403 | 0.704423  | 0.909624  | 1.000      |
| 266  | GOBP-LOCOMOTORY-BEHAVIOR                          | 8    | -0.300000 | -0.823014 | 0.696126  | 0.908631  | 1.000      |
| 267  | GOBP-CELLULAR-LIPID-METABOLIC-PROCESS             | 7    | -0.310454 | -0.823059 | 0.711929  | 0.910545  | 1.000      |
| 268  | GOBP-NEGATIVE-REGULATION-OF-NEURON-DEATH          | 11   | -0.272538 | -0.826276 | 0.684770  | 0.906912  | 1.000      |
| 269  | GOBP-CHEMICAL-HOMEOSTASIS                         | 23   | -0.228217 | -0.828217 | 0.687836  | 0.905475  | 1.000      |
| 270  | GOBP-MORPHOGENESIS-OF-AN-EPITHELIUM               | 6    | -0.332542 | -0.829400 | 0.702945  | 0.905425  | 1.000      |
| 271  | GOBP-NEGATIVE-REGULATION-OF-PROTEOLYSIS           | 8    | -0.308854 | -0.834784 | 0.702703  | 0.897880  | 1.000      |
| 272  | GOBP-INTRACELLULAR-PROTEIN-TRANSPORT              | 8    | -0.305823 | -0.836534 | 0.684783  | 0.896815  | 1.000      |
| 273  | GOBP-REGULATION-OF-OSTEOCLAST-DIFFERENTIATION     | 5    | -0.355416 | -0.836542 | 0.674839  | 0.898770  | 1.000      |
| 274  | GOBP-LOCOMOTION                                   | 31   | -0.222664 | -0.843391 | 0.672359  | 0.887116  | 1.000      |
| 275  | GOBP-ORGANONITROGEN-COMPOUND-BIOSYNTHETIC-PROCESS | 13   | -0.274732 | -0.845775 | 0.657534  | 0.886729  | 1.000      |

Continuation of Table S10

| NAME | ID                                                 | SIZE          | ES | NES       | NOM.p.val | FDR.q.val | FWER.p.val |
|------|----------------------------------------------------|---------------|----|-----------|-----------|-----------|------------|
| 276  | GOBP-CHROMOSOME_ORGANIZATION                       | GO-0051276    | 6  | -0.344368 | -0.848940 | 0.675291  | 0.882959   |
| 277  | GOBP-CELLULAR_RESPONSE_TO_PEP_TIDE_HORMONE_STIM... | GO-0071375    | 9  | -0.303289 | -0.851775 | 0.669565  | 0.879967   |
| 278  | GOBP-SENSORY_PERCEPTION_OF_PAIN                    | GO-0019233    | 5  | -0.359701 | -0.852870 | 0.648294  | 0.879989   |
| 279  | GOBP-ORGANIC_ACID_METABOLIC_PROCESS                | GO-0006082    | 7  | -0.315379 | -0.853015 | 0.648546  | 0.881692   |
| 280  | GOBP-RESPONSE_TO_ALCOHOL                           | GO-0097305    | 11 | -0.277153 | -0.853224 | 0.657647  | 0.883256   |
| 281  | REACTOME-MEMBRANE_TRAFFICKING                      | R-RNO-199991  | 5  | -0.356914 | -0.856123 | 0.649077  | 0.879910   |
| 282  | REACTOME-VESICLE_MEDIATED_TRANSPORT                | R-RNO-5053656 | 5  | -0.356914 | -0.858032 | 0.643236  | 0.878430   |
| 283  | REACTOME-RHO_GTPASE_EFFECTORS                      | R-RNO-195258  | 9  | -0.305686 | -0.858675 | 0.653382  | 0.879296   |
| 284  | GOBP-PROTEIN_PHOSPHORYLATION                       | GO-0006468    | 33 | -0.224879 | -0.860153 | 0.672287  | 0.878637   |
| 285  | GOBP-PERIPHERAL_NERVOUS_SYSTEM_DEVELOPMENT         | GO-0007422    | 9  | -0.302556 | -0.862009 | 0.659731  | 0.877243   |
| 286  | GOBP-TISSUE_MORPHOGENESIS                          | GO-0048729    | 7  | -0.330144 | -0.871102 | 0.635787  | 0.862795   |
| 287  | GOBP-REGULATION_OF_PROTEIN_BINDING                 | GO-0043393    | 7  | -0.329703 | -0.872666 | 0.622307  | 0.861885   |
| 288  | GOBP-PROTEIN_LOCALIZATION_TO_PLASMA_MEMBRANE       | GO-0072659    | 7  | -0.334640 | -0.873147 | 0.612296  | 0.863007   |
| 289  | GOBP-PROTEIN_COMPLEX_OLIGOMERIZATION               | GO-0051259    | 7  | -0.326575 | -0.874530 | 0.620779  | 0.862387   |
| 290  | GOBP-REGULATION_OF_PEP_TIDASE_ACTIVITY             | GO-0052547    | 10 | -0.297950 | -0.875246 | 0.649939  | 0.862984   |
| 291  | GOBP-PHOSPHATIDYLINOSITOL_3_KINASE_SIGNALING       | GO-0014065    | 7  | -0.334663 | -0.875382 | 0.601258  | 0.864765   |
| 292  | REACTOME-SIGNALING_BY_RHO_GTPASES_MIRO_GTPASES...  | R-RNO-9716542 | 9  | -0.305686 | -0.875843 | 0.610849  | 0.865904   |
| 293  | GOBP-REGULATION_OF_LIPID_LOCALIZATION              | GO-1905952    | 5  | -0.379489 | -0.877565 | 0.609290  | 0.864694   |
| 294  | GOBP-WOUND_HEALING                                 | GO-0042060    | 13 | -0.277601 | -0.877816 | 0.625290  | 0.866209   |
| 295  | GOBP-RESPONSE_TO_PEP_TIDE_HORMONE                  | GO-0043434    | 13 | -0.277589 | -0.877975 | 0.611561  | 0.867869   |
| 296  | GOBP-CELL_ACTIVATION                               | GO-0001775    | 22 | -0.244754 | -0.878597 | 0.643703  | 0.868849   |
| 297  | GOBP-RESPONSE_TO_HORMONE                           | GO-0009725    | 20 | -0.251645 | -0.878697 | 0.634173  | 0.870679   |
| 298  | GOBP-POSITIVE_REGULATION_OF_CATALYTIC_ACTIVITY     | GO-0043085    | 29 | -0.236773 | -0.879058 | 0.658405  | 0.872074   |
| 299  | GOBP-EPITHELIAL_CELL_DIFFERENTIATION               | GO-0030855    | 7  | -0.327550 | -0.880365 | 0.610619  | 0.871719   |
| 300  | GOBP-TUBE_DEVELOPMENT                              | GO-0035295    | 18 | -0.254102 | -0.885621 | 0.614016  | 0.863885   |
| 301  | GOBP-GLUCOSE_METABOLIC_PROCESS                     | GO-0006006    | 6  | -0.353225 | -0.886008 | 0.613184  | 0.865267   |
| 302  | REACTOME-SIGNALING_BY_NUCLEAR_RECEPTORS            | R-RNO-9006931 | 8  | -0.321798 | -0.886343 | 0.620823  | 0.866703   |
| 303  | GOBP-POSITIVE_REGULATION_OF_PROTEIN_SERINE_THR...  | GO-0071902    | 9  | -0.312283 | -0.886363 | 0.630824  | 0.868723   |
| 304  | REACTOME-ESR-MEDIATED_SIGNALING                    | R-RNO-8939211 | 8  | -0.321798 | -0.886525 | 0.597070  | 0.870478   |
| 305  | GOBP-SMALL_GTPASE-MEDIATED_SIGNAL_TRANSDUCTION     | GO-0007264    | 8  | -0.323232 | -0.886584 | 0.618644  | 0.872443   |
| 306  | GOBP-MONOCARBOXYLIC_ACID_METABOLIC_PROCESS         | GO-0032787    | 6  | -0.355194 | -0.886618 | 0.601504  | 0.874458   |
| 307  | GOBP-MONOSACCHARIDE_METABOLIC_PROCESS              | GO-0005996    | 6  | -0.353225 | -0.886936 | 0.605469  | 0.875981   |
| 308  | GOBP-MONOAMINE_TRANSPORT                           | GO-0015844    | 5  | -0.377950 | -0.889683 | 0.576503  | 0.872823   |
| 309  | GOBP-POSITIVE_REGULATION_OF_MYELOID_LEUKOCYTE...   | GO-0002763    | 6  | -0.354979 | -0.891500 | 0.607792  | 0.871390   |
| 310  | GOBP-REGULATION_OF_SYNAPSE_STRUCTURE_OR_ACTIVITY   | GO-0050803    | 11 | -0.290626 | -0.891631 | 0.595819  | 0.873204   |
| 311  | REACTOME-SIGNALING_BY_NTRKS                        | R-RNO-166520  | 18 | -0.258634 | -0.894830 | 0.613611  | 0.869279   |
| 312  | GOBP-SMALL_MOLECULE_METABOLIC_PROCESS              | GO-0044281    | 16 | -0.266292 | -0.896214 | 0.590960  | 0.868646   |
| 313  | GOBP-REGULATION_OF_MYELOID_CELL_DIFFERENTIATION    | GO-0045637    | 9  | -0.308249 | -0.897610 | 0.596698  | 0.867983   |
| 314  | GOBP-ANION_TRANSMEMBRANE_TRANSPORT                 | GO-0098656    | 7  | -0.340022 | -0.898773 | 0.599499  | 0.867716   |
| 315  | GOBP-PEPTIDE_BIOSYNTHETIC_PROCESS                  | GO-0043043    | 6  | -0.362184 | -0.905454 | 0.608966  | 0.856808   |
| 316  | GOBP-AMIDE_BIOSYNTHETIC_PROCESS                    | GO-0043604    | 6  | -0.362184 | -0.906868 | 0.580769  | 0.856085   |
| 317  | GOBP-INTRACELLULAR_TRANSPORT                       | GO-0046907    | 10 | -0.309368 | -0.906913 | 0.574316  | 0.858110   |
| 318  | GOBP-POSITIVE_REGULATION_OF_ION_TRANSPORT          | GO-0043270    | 17 | -0.268282 | -0.912266 | 0.587500  | 0.849900   |

Continuation of Table S10

| NAME                                                             | ID            | SIZE | ES        | NES       | NOM.p.val | FDR.q.val | FWER.p.val |
|------------------------------------------------------------------|---------------|------|-----------|-----------|-----------|-----------|------------|
| 319 GOBP.NERVOUS_SYSTEM.PROCESS                                  | GO:0050877    | 38   | -0.236307 | -0.912821 | 0.577614  | 0.850850  | 1.000      |
| 320 GOBP.RAS.PROTEIN.SIGNAL.TRANSDUCTION                         | GO:0007265    | 5    | -0.389252 | -0.912947 | 0.588811  | 0.852673  | 1.000      |
| 321 GOBP.ORGANONITROGEN.COMPOUND.CATABOLIC.PROCESS               | GO:1901565    | 10   | -0.312859 | -0.913405 | 0.556220  | 0.853854  | 1.000      |
| 322 GOBP.CELLULAR.HOMEOSTASIS                                    | GO:0019725    | 18   | -0.265920 | -0.914289 | 0.570953  | 0.854267  | 1.000      |
| 323 GOBP.POSITIVE.REGULATION.OF.IMMUNE.SYSTEM.PROCESS            | GO:0002684    | 18   | -0.268208 | -0.914390 | 0.574635  | 0.856182  | 1.000      |
| 324 GOBP.PROTEIN.KINASE.B.SIGNALING                              | GO:0043491    | 6    | -0.371728 | -0.915168 | 0.587071  | 0.856780  | 1.000      |
| 325 REACTOME.HEMOSTASIS                                          | R-RNO-109582  | 14   | -0.280338 | -0.916834 | 0.546296  | 0.855469  | 1.000      |
| 326 GOBP.LONG.TERM.SYNAPTIC.POTENTIATION                         | GO:0060291    | 12   | -0.293781 | -0.919528 | 0.560414  | 0.852296  | 1.000      |
| 327 GOBP.CELLULAR.RESPONSE.TO.NITROGEN.COMPOUND                  | GO:1901699    | 20   | -0.263656 | -0.919554 | 0.575221  | 0.854382  | 1.000      |
| 328 GOBP.LEUKOCYTE.DIFFERENTIATION                               | GO:0002521    | 15   | -0.284232 | -0.920613 | 0.577227  | 0.854457  | 1.000      |
| 329 GOBP.CHROMATIN.ORGANIZATION                                  | GO:0006325    | 5    | -0.399327 | -0.921961 | 0.568575  | 0.854036  | 1.000      |
| 330 GOBP.PROTEIN.CONTAINING.COMPLEX.SUBUNIT.ORGANIZATION         | GO:0043933    | 15   | -0.282135 | -0.923272 | 0.572748  | 0.853597  | 1.000      |
| 331 GOBP.POSITIVE.REGULATION.OF.MYELOID.CELL.DIFFERENTIATION     | GO:0045639    | 7    | -0.347737 | -0.925513 | 0.556544  | 0.851479  | 1.000      |
| 332 GOBP.PROTEIN.TETRAMERIZATION                                 | GO:0051262    | 5    | -0.405198 | -0.930760 | 0.559367  | 0.842707  | 1.000      |
| 333 REACTOME.CELL.CYCLE.MITOTIC                                  | R-RNO-69278   | 5    | -0.396907 | -0.932373 | 0.535533  | 0.841554  | 1.000      |
| 334 GOBP.POSTTRANSCRIPTIONAL.REGULATION.OF.GENE.EXPRESSION       | GO:0010608    | 8    | -0.337817 | -0.933078 | 0.567436  | 0.842146  | 1.000      |
| 335 REACTOME.TRAFFICKING.OF.GLUR2.CONTAINING.AMPA.RECEPTOR       | R-RNO-416993  | 8    | -0.336724 | -0.934288 | 0.545122  | 0.841766  | 1.000      |
| 336 GOBP.MUSCLE.SYSTEM.PROCESS                                   | GO:0003012    | 9    | -0.326958 | -0.934652 | 0.545894  | 0.843078  | 1.000      |
| 337 GOBP.SMALL.MOLECULE.BIOSYNTHETIC.PROCESS                     | GO:0044283    | 5    | -0.392995 | -0.934734 | 0.545087  | 0.845052  | 1.000      |
| 338 GOBP.SYNAPSE.ORGANIZATION                                    | GO:0050808    | 17   | -0.273696 | -0.934848 | 0.548206  | 0.846981  | 1.000      |
| 339 GOBP.PROTEIN.LOCALIZATION.TO.CELL.JUNCTION                   | GO:1902414    | 6    | -0.373846 | -0.935862 | 0.529948  | 0.847121  | 1.000      |
| 340 GOBP.POSITIVE.REGULATION.OF.SMOOTH.MUSCLE.CELL.CONTRACTILITY | GO:0048661    | 5    | -0.393275 | -0.938059 | 0.525266  | 0.844911  | 1.000      |
| 341 GOBP.REGULATION.OF.CATABOLIC.PROCESS                         | GO:0008894    | 13   | -0.298883 | -0.938481 | 0.549020  | 0.846274  | 1.000      |
| 342 GOBP.FATTY.ACID.TRANSPORT                                    | GO:0015908    | 6    | -0.376106 | -0.938692 | 0.535668  | 0.848048  | 1.000      |
| 343 GOBP.POSITIVE.REGULATION.OF.SIGNALING                        | GO:0023056    | 34   | -0.241549 | -0.939576 | 0.579894  | 0.848355  | 1.000      |
| 344 GOBP.REGULATION.OF.LYMPHOCYTE.ACTIVATION                     | GO:0051249    | 5    | -0.392239 | -0.942049 | 0.519308  | 0.845318  | 1.000      |
| 345 GOBP.NEGATIVE.REGULATION.OF.TRANSPORT                        | GO:0051051    | 13   | -0.296902 | -0.950803 | 0.518182  | 0.829692  | 1.000      |
| 346 GOBP.CELL.MORPHOGENESIS.INVOLVED.IN.NEURON.DIFFERENTIATION   | GO:0048667    | 22   | -0.265740 | -0.951242 | 0.528078  | 0.830967  | 1.000      |
| 347 GOBP.REGULATION.OF.AXONOGENESIS                              | GO:0050770    | 7    | -0.357561 | -0.951508 | 0.528061  | 0.832660  | 1.000      |
| 348 GOBP.PLATELET.ACTIVATION                                     | GO:0030168    | 6    | -0.376801 | -0.954033 | 0.515789  | 0.829469  | 1.000      |
| 349 REACTOME.INFECTIOUS.DISEASE                                  | R-HSA-5663205 | 12   | -0.305608 | -0.955767 | 0.518900  | 0.827979  | 1.000      |
| 350 GOBP.NEURON.DEATH                                            | GO:0070997    | 18   | -0.280448 | -0.957834 | 0.524554  | 0.825968  | 1.000      |
| 351 GOBP.PROTEIN.LOCALIZATION.TO.CELL.PERIPHERY                  | GO:1990778    | 12   | -0.314959 | -0.957958 | 0.524684  | 0.827915  | 1.000      |
| 352 GOBP.MUSCLE.ORGAN.DEVELOPMENT                                | GO:0007517    | 9    | -0.338417 | -0.958220 | 0.519952  | 0.829616  | 1.000      |
| 353 GOBP.CELL.MORPHOGENESIS.INVOLVED.IN.DIFFERENTIATION          | GO:0000904    | 22   | -0.265740 | -0.958284 | 0.527192  | 0.831730  | 1.000      |
| 354 HALLMARK.KRAS.SIGNALING.UP                                   | M5953         | 6    | -0.376214 | -0.960802 | 0.506494  | 0.828613  | 1.000      |
| 355 GOBP.REGULATION.OF.PHOSPHORUS.METABOLIC.PROCESS              | GO:0051174    | 26   | -0.260514 | -0.961582 | 0.527897  | 0.829218  | 1.000      |
| 356 GOBP.CELL.CELL.SIGNALING.BY.WNT                              | GO:0198738    | 7    | -0.367762 | -0.962011 | 0.505102  | 0.830594  | 1.000      |
| 357 GOBP.REGULATION.OF.CIRCADIAN.RHYTHM                          | GO:0042752    | 7    | -0.362100 | -0.963517 | 0.513043  | 0.829575  | 1.000      |
| 358 GOBP.CATION.TRANSPORT                                        | GO:0006812    | 25   | -0.264506 | -0.964482 | 0.521413  | 0.829786  | 1.000      |
| 359 GOBP.METAL.ION.TRANSPORT                                     | GO:0030001    | 11   | -0.319596 | -0.966319 | 0.504751  | 0.828161  | 1.000      |
| 360 GOBP.CALCIUM.ION.TRANSPORT                                   | GO:0006816    | 11   | -0.319596 | -0.968776 | 0.508178  | 0.825217  | 1.000      |
| 361 GOBP.LIPID.LOCALIZATION                                      | GO:0010876    | 10   | -0.330697 | -0.968894 | 0.508961  | 0.827196  | 1.000      |

Continuation of Table S10

|     | NAME                                              | ID            | SIZE | ES        | NES       | NOM.p.val | FDR.q.val | FWER.p.val |
|-----|---------------------------------------------------|---------------|------|-----------|-----------|-----------|-----------|------------|
| 362 | GOBP-LEUKOCYTE-MIGRATION                          | GO-0050900    | 6    | -0.385138 | -0.969430 | 0.487990  | 0.828289  | 1.000      |
| 363 | GOBP-RESPONSE.TO.DRUG                             | GO-0042493    | 11   | -0.324968 | -0.970119 | 0.505364  | 0.829115  | 1.000      |
| 364 | GOBP-REGULATION.OF.FAT.CELL.DIFFERENTIATION       | GO-0045598    | 6    | -0.389155 | -0.970252 | 0.494297  | 0.831079  | 1.000      |
| 365 | GOBP-BEHAVIOR                                     | GO-0007610    | 33   | -0.255876 | -0.971366 | 0.520256  | 0.830883  | 1.000      |
| 366 | REACTOME-MAPK-TARGETS.NUCLEAR.EVENTS.MEDIATED.... | R-HSA-450282  | 5    | -0.420342 | -0.971958 | 0.500652  | 0.831897  | 1.000      |
| 367 | GOBP-REGULATION.OF.MUSCLE.SYSTEM.PROCESS          | GO-0090257    | 8    | -0.351782 | -0.972163 | 0.484316  | 0.833827  | 1.000      |
| 368 | GOBP-REGULATION.OF.CELL.SIZE                      | GO-0008361    | 5    | -0.409639 | -0.972250 | 0.484973  | 0.835983  | 1.000      |
| 369 | GOBP-DEFENSE.RESPONSE                             | GO-0006952    | 19   | -0.285875 | -0.974380 | 0.512651  | 0.833542  | 1.000      |
| 370 | GOBP-REGULATION.OF.CATION.CHANNEL.ACTIVITY        | GO-2001257    | 14   | -0.300767 | -0.975014 | 0.501718  | 0.834455  | 1.000      |
| 371 | GOBP-REGULATION.OF.NMDA.RECEPTOR.ACTIVITY         | GO-2000310    | 10   | -0.327141 | -0.975625 | 0.498229  | 0.835486  | 1.000      |
| 372 | GOBP-ORGANIC.HYDROXY.COMPOUND-TRANSPORT           | GO-0015850    | 6    | -0.386591 | -0.975627 | 0.494297  | 0.837848  | 1.000      |
| 373 | GOBP-NEGATIVE-REGULATION.OF.LIPID.METABOLIC.PR... | GO-0045833    | 5    | -0.413736 | -0.977581 | 0.456989  | 0.835975  | 1.000      |
| 374 | REACTOME-CELLULAR.RESPONSES.TO.EXTERNAL.STIMULI   | R-RNO-8953897 | 11   | -0.320442 | -0.977825 | 0.487945  | 0.837793  | 1.000      |
| 375 | GOBP-AMINO-ACID-TRANSPORT                         | GO-0006865    | 6    | -0.389695 | -0.978924 | 0.493573  | 0.837872  | 1.000      |
| 376 | GOBP-REGULATION.OF-TRANSMEMBRANE-TRANSPORT        | GO-0034762    | 23   | -0.274103 | -0.980861 | 0.493003  | 0.830162  | 1.000      |
| 377 | GOBP-RESPONSE.TO.WOUNDING                         | GO-0009611    | 15   | -0.299312 | -0.981384 | 0.499441  | 0.837509  | 1.000      |
| 378 | GOBP-IMMUNE.SYSTEM.DEVELOPMENT                    | GO-0002520    | 17   | -0.291260 | -0.983641 | 0.479422  | 0.835024  | 1.000      |
| 379 | GOBP-NEGATIVE-REGULATION.OF.LOCOMOTION            | GO-0040013    | 5    | -0.420013 | -0.985637 | 0.473404  | 0.832823  | 1.000      |
| 380 | GOBP-ORGANIC-ANION-TRANSPORT                      | GO-0015711    | 6    | -0.389695 | -0.985803 | 0.479896  | 0.834904  | 1.000      |
| 381 | GOBP-CARBOXYLIC-ACID-TRANSPORT                    | GO-0046942    | 6    | -0.389695 | -0.990321 | 0.473548  | 0.827189  | 1.000      |
| 382 | GOBP-REGULATION.OF-TRANSFERASE-ACTIVITY           | GO-0051338    | 21   | -0.283302 | -0.990363 | 0.478735  | 0.829495  | 1.000      |
| 383 | GOBP-RESPONSE.TO.NICOTINE                         | GO-0035094    | 7    | -0.374343 | -0.992663 | 0.467500  | 0.826919  | 1.000      |
| 384 | GOBP-PROTEIN-LOCALIZATION.TO.MEMBRANE             | GO-0072657    | 13   | -0.306092 | -0.992891 | 0.468499  | 0.828836  | 1.000      |
| 385 | GOBP-NEGATIVE-REGULATION.OF.SIGNALING             | GO-0023057    | 21   | -0.276866 | -0.992983 | 0.490545  | 0.831085  | 1.000      |
| 386 | GOBP-SPROUTING-ANGIOGENESIS                       | GO-0002040    | 5    | -0.421222 | -0.994612 | 0.464332  | 0.830003  | 1.000      |
| 387 | GOBP-REGULATION.OF-PROTEIN.KINASE-ACTIVITY        | GO-0045859    | 21   | -0.283302 | -0.995622 | 0.472588  | 0.829999  | 1.000      |
| 388 | GOBP-MUSCLE-STRUCTURE.DEVELOPMENT                 | GO-0061061    | 16   | -0.294853 | -0.996373 | 0.472222  | 0.830789  | 1.000      |
| 389 | REACTOME-ESTROGEN-DEPENDENT.NUCLEAR.EVENTS.DOW... | R-RNO-963463  | 5    | -0.423723 | -0.997355 | 0.454784  | 0.830945  | 1.000      |
| 390 | GOBP-REGULATION.OF-CELL.PROJECTION-ORGANIZATION   | GO-0031344    | 20   | -0.285703 | -0.997825 | 0.468341  | 0.832361  | 1.000      |
| 391 | REACTOME-POST-TRANSLATIONAL-PROTEIN-MODIFICATION  | R-RNO-597592  | 7    | -0.377869 | -0.998508 | 0.490050  | 0.833302  | 1.000      |
| 392 | GOBP-RESPONSE.TO.CADMIUM-ION                      | GO-0046686    | 6    | -0.401690 | -1.001733 | 0.473548  | 0.828313  | 1.000      |
| 393 | GOBP-POSITIVE-REGULATION.OF-CELL-DEATH            | GO-0010942    | 19   | -0.289943 | -1.001906 | 0.467778  | 0.830386  | 1.000      |
| 394 | GOBP-POSITIVE-REGULATION.OF-MOLECULAR-FUNCTION    | GO-0044093    | 37   | -0.263296 | -1.003181 | 0.453207  | 0.829905  | 1.000      |
| 395 | GOBP-POSITIVE-REGULATION.OF-CELLULAR-COMPONENT... | GO-0044089    | 9    | -0.358781 | -1.004531 | 0.458937  | 0.829418  | 1.000      |
| 396 | GOBP-NEGATIVE-REGULATION.OF-IMMUNE-SYSTEM-PROCESS | GO-0002683    | 5    | -0.428853 | -1.004846 | 0.451303  | 0.831201  | 1.000      |
| 397 | GOBP-REGULATION.OF-CATION-TRANSMEMBRANE-TRANSPORT | GO-1904062    | 16   | -0.302820 | -1.005330 | 0.470990  | 0.832619  | 1.000      |
| 398 | GOBP-RESPONSE.TO.UV                               | GO-0009411    | 5    | -0.421474 | -1.005371 | 0.454667  | 0.835070  | 1.000      |
| 399 | GOBP-NEURON-MIGRATION                             | GO-0001764    | 5    | -0.421617 | -1.008002 | 0.442283  | 0.831338  | 1.000      |
| 400 | REACTOME-RNA.POLYMERASE.II.TRANSCRIPTION          | R-RNO-73857   | 20   | -0.292694 | -1.010033 | 0.463043  | 0.829555  | 1.000      |
| 401 | GOBP-OSTEOCLAST-DIFFERENTIATION                   | GO-0030316    | 6    | -0.400337 | -1.010183 | 0.448635  | 0.831776  | 1.000      |
| 402 | GOBP-ANATOMICAL-STRUCTURE-FORMATION-INVOLVED.I... | GO-0048646    | 20   | -0.291298 | -1.011654 | 0.463087  | 0.831140  | 1.000      |
| 403 | GOBP-INORGANIC-ION-TRANSMEMBRANE-TRANSPORT        | GO-0098600    | 9    | -0.353803 | -1.013285 | 0.430108  | 0.829812  | 1.000      |
| 404 | GOBP-POSITIVE-REGULATION.OF-AXONOGENESIS          | GO-0050772    | 5    | -0.433603 | -1.013886 | 0.441799  | 0.830928  | 1.000      |

Continuation of Table S10

|     | NAME                                               | ID            | SIZE | ES        | NES       | NOM.p.val | FDR.q.val | FWER.p.val |
|-----|----------------------------------------------------|---------------|------|-----------|-----------|-----------|-----------|------------|
| 405 | GOBP-CIRCADIAN_RHYTHM                              | GO-0007623    | 13   | -0.326391 | -1.014513 | 0.457901  | 0.832087  | 1.000      |
| 406 | REACTOME-SIGNALING_BY_RECEPTOR_TYROSINE_KINASES    | R-RNO-9006934 | 26   | -0.275990 | -1.018421 | 0.448387  | 0.825379  | 1.000      |
| 407 | GOBP-NEGATIVE-REGULATION_OF_ION_TRANSPORT          | GO-0043271    | 11   | -0.342893 | -1.022542 | 0.426714  | 0.818137  | 1.000      |
| 408 | GOBP-REGULATION_OF_PROTEOLYSIS                     | GO-0030162    | 12   | -0.331043 | -1.022584 | 0.443662  | 0.820629  | 1.000      |
| 409 | REACTOME-G-ALPHA-Q-SIGNALING-EVENTS                | R-RNO-416476  | 6    | -0.411248 | -1.023725 | 0.439735  | 0.820579  | 1.000      |
| 410 | GOBP-ENDOMEMBRANE-SYSTEM-ORGANIZATION              | GO-0010256    | 6    | -0.410004 | -1.025210 | 0.443850  | 0.819779  | 1.000      |
| 411 | GOBP-MUSCLE-CELL-PROLIFERATION                     | GO-0033002    | 8    | -0.374825 | -1.025922 | 0.422794  | 0.820679  | 1.000      |
| 412 | GOBP-REGULATION_OF_MYELOID_LEUKOCYTE-DIFFERENT...  | GO-0002761    | 8    | -0.370141 | -1.027025 | 0.417800  | 0.820560  | 1.000      |
| 413 | GOBP-LYMPHOCYTE-ACTIVATION                         | GO-0046649    | 10   | -0.347701 | -1.027032 | 0.447115  | 0.823187  | 1.000      |
| 414 | GOBP-BIOLOGICAL-ADHESION                           | GO-0022610    | 19   | -0.294813 | -1.027039 | 0.423453  | 0.825820  | 1.000      |
| 415 | GOBP-RESPONSE-TO-METAL-ION                         | GO-0010038    | 15   | -0.313118 | -1.027417 | 0.420814  | 0.827604  | 1.000      |
| 416 | GOBP-REGULATION_OF_SYNAPTIC-PLASTICITY             | GO-0048167    | 21   | -0.287753 | -1.028705 | 0.433880  | 0.827038  | 1.000      |
| 417 | GOBP-POSITIVE-REGULATION_OF_CYSSTEINE-TYPE-ENDO... | GO-2001056    | 7    | -0.391886 | -1.028824 | 0.423750  | 0.829438  | 1.000      |
| 418 | GOBP-REGULATION_OF_INFLAMMATORY-RESPONSE           | GO-0050727    | 7    | -0.321160 | -1.031123 | 0.418114  | 0.826517  | 1.000      |
| 419 | GOBP-POSITIVE-REGULATION_OF_CELL-POPULATION-PR...  | GO-0008284    | 21   | -0.292261 | -1.031908 | 0.420530  | 0.827259  | 1.000      |
| 420 | GOBP-MACROMOLECULE-CATABOLIC-PROCESS               | GO-0009057    | 11   | -0.342871 | -1.033545 | 0.416568  | 0.825952  | 1.000      |
| 421 | GOBP-CELL-JUNCTION-ORGANIZATION                    | GO-0034330    | 19   | -0.302127 | -1.034770 | 0.440176  | 0.825495  | 1.000      |
| 422 | GOBP-CELLULAR-MACROMOLECULE-LOCALIZATION           | GO-0070727    | 20   | -0.291044 | -1.036016 | 0.413755  | 0.825030  | 1.000      |
| 423 | GOBP-NEGATIVE-REGULATION_OF_CELL-PROJECTION-OR...  | GO-0031345    | 5    | -0.440213 | -1.036708 | 0.404700  | 0.826184  | 1.000      |
| 424 | GOBP-AGING                                         | GO-0007568    | 13   | -0.327160 | -1.038466 | 0.407070  | 0.824577  | 1.000      |
| 425 | GOBP-MULTI-ORGANISM-PROCESS                        | GO-0051704    | 16   | -0.311217 | -1.038827 | 0.397536  | 0.826482  | 1.000      |
| 426 | GOBP-NEGATIVE-REGULATION_OF_PROTEIN-CATABOLIC...   | GO-0042177    | 5    | -0.440124 | -1.039431 | 0.399731  | 0.827774  | 1.000      |
| 427 | GOBP-REGULATION_OF_CYSSTEINE-TYPE-ENDOPEPTIDASE... | GO-2000116    | 9    | -0.364639 | -1.039458 | 0.416766  | 0.830485  | 1.000      |
| 428 | GOBP-MYELOID-CELL-DIFFERENTIATION                  | GO-0030099    | 13   | -0.324685 | -1.041287 | 0.413242  | 0.828708  | 1.000      |
| 429 | GOBP-NEGATIVE-REGULATION_OF_CELL-CYCLE             | GO-0045786    | 5    | -0.441291 | -1.043211 | 0.410188  | 0.826708  | 1.000      |
| 430 | GOBP-REGULATION_OF_ANION-TRANSMEMBRANE-TRANSPORT   | GO-1903959    | 5    | -0.446068 | -1.044960 | 0.412316  | 0.825186  | 1.000      |
| 431 | GOBP-EPIDERMIS-DEVELOPMENT                         | GO-0008544    | 5    | -0.440136 | -1.045830 | 0.399464  | 0.825862  | 1.000      |
| 432 | REACTOME-DEATH-RECEPTOR-SIGNALING                  | R-RNO-73887   | 5    | -0.446982 | -1.047353 | 0.398385  | 0.824791  | 1.000      |
| 433 | GOBP-CARBOHYDRATE-DERIVATIVE-METABOLIC-PROCESS     | GO-1901135    | 8    | -0.379542 | -1.047511 | 0.390511  | 0.827276  | 1.000      |
| 434 | GOBP-CELLULAR-CARBOHYDRATE-METABOLIC-PROCESS       | GO-0044262    | 5    | -0.443114 | -1.049487 | 0.397835  | 0.825011  | 1.000      |
| 435 | GOBP-REGULATION_OF_DEFENSE-RESPONSE                | GO-0031347    | 7    | -0.395809 | -1.049777 | 0.397727  | 0.827204  | 1.000      |
| 436 | GOBP-REGULATION_OF_SMALL-MOLECULE-METABOLIC-PR...  | GO-0062012    | 9    | -0.367446 | -1.051583 | 0.403423  | 0.825460  | 1.000      |
| 437 | GOBP-CYTOKINE-PRODUCTION                           | GO-0001816    | 10   | -0.358901 | -1.052447 | 0.400984  | 0.826134  | 1.000      |
| 438 | GOBP-RESPONSE-TO-ETHANOL                           | GO-0045471    | 5    | -0.451259 | -1.053275 | 0.384298  | 0.827046  | 1.000      |
| 439 | GOBP-REGULATION_OF-CARBOHYDRATE-BIOSYNTHETIC-P...  | GO-0043255    | 5    | -0.447822 | -1.053632 | 0.383798  | 0.828980  | 1.000      |
| 440 | GOBP-CELLULAR-MACROMOLECULE-CATABOLIC-PROCESS      | GO-0044265    | 5    | -0.443521 | -1.053650 | 0.370027  | 0.831833  | 1.000      |
| 441 | GOBP-PROTEIN-CATABOLIC-PROCESS                     | GO-0030163    | 8    | -0.383951 | -1.054010 | 0.404674  | 0.833714  | 1.000      |
| 442 | GOBP-REGULATION_OF-CARBOHYDRATE-METABOLIC-PROCESS  | GO-0006109    | 5    | -0.447822 | -1.054522 | 0.382234  | 0.835360  | 1.000      |
| 443 | GOBP-POSITIVE-REGULATION_OF_PEPTIDASE-ACTIVITY     | GO-0010952    | 7    | -0.391886 | -1.055062 | 0.404551  | 0.836930  | 1.000      |
| 444 | REACTOME-NGF-STIMULATED-TRANSCRIPTION              | R-RNO-9031628 | 9    | -0.373185 | -1.057769 | 0.402895  | 0.833175  | 1.000      |
| 445 | GOBP-POSITIVE-REGULATION_OF_CELL-GROWTH            | GO-0030307    | 6    | -0.413737 | -1.058209 | 0.386305  | 0.835103  | 1.000      |
| 446 | GOBP-REGULATION_OF-LIPASE-ACTIVITY                 | GO-0060191    | 6    | -0.423051 | -1.058339 | 0.374036  | 0.837746  | 1.000      |
| 447 | GOBP-POSITIVE-REGULATION_OF_CELL-PROJECTION-OR...  | GO-0031346    | 10   | -0.357091 | -1.063334 | 0.383353  | 0.827960  | 1.000      |

Continuation of Table S10

| NAME | ID                                                | SIZE | ES        | NES       | NOM.p.val | FDR.q.val | FWER.p.val |
|------|---------------------------------------------------|------|-----------|-----------|-----------|-----------|------------|
| 448  | GOBP-RESPONSE.TO.NITROGEN.COMPOUND                | 35   | -0.277884 | -1.063930 | 0.397028  | 0.829442  | 1.000      |
| 449  | GOBP-MYELOID-LEUKOCYTE-DIFFERENTIATION            | 11   | -0.346319 | -1.065109 | 0.389773  | 0.829400  | 1.000      |
| 450  | GOBP-POSITIVE-REGULATION-OF-LEUKOCYTE-CELL-CEL... | 5    | -0.454164 | -1.065268 | 0.378628  | 0.831966  | 1.000      |
| 451  | GOBP-CARBOHYDRATE-BIOSYNTHETIC-PROCESS            | 5    | -0.447822 | -1.065283 | 0.366534  | 0.834969  | 1.000      |
| 452  | GOBP-CALCIUM-MEDIATED-SIGNALING                   | 10   | -0.360061 | -1.065963 | 0.365882  | 0.836185  | 1.000      |
| 453  | GOBP-REGULATION-OF-EXTRINSIC-APOPTOTIC-SIGNALI... | 6    | -0.421645 | -1.066739 | 0.376486  | 0.837302  | 1.000      |
| 454  | GOBP-REGULATION-OF-IMMUNE-SYSTEM-PROCESS          | 21   | -0.304706 | -1.067738 | 0.384865  | 0.837741  | 1.000      |
| 455  | GOBP-IMMUNE-EFFECTOR-PROCESS                      | 11   | -0.358006 | -1.068809 | 0.386555  | 0.837981  | 1.000      |
| 456  | GOBP-POSITIVE-REGULATION-OF-CELL-CELL-ADHESION    | 5    | -0.454164 | -1.069934 | 0.381770  | 0.838228  | 1.000      |
| 457  | GOBP-POSITIVE-REGULATION-OF-IMMUNE-RESPONSE       | 9    | -0.372555 | -1.070215 | 0.397375  | 0.840773  | 1.000      |
| 458  | GOBP-CENTRAL-NERVOUS-SYSTEM-NEURON-DIFFERENTIA... | 5    | -0.454860 | -1.070765 | 0.362784  | 0.842428  | 1.000      |
| 459  | GOBP-CELL-CELL-JUNCTION-ORGANIZATION              | 6    | -0.421231 | -1.070949 | 0.374836  | 0.845100  | 1.000      |
| 460  | GOBP-REGULATION-OF-INTRACELLULAR-SIGNAL-TRANSD... | 21   | -0.301244 | -1.072140 | 0.375965  | 0.844952  | 1.000      |
| 461  | GOBP-HEAD-DEVELOPMENT                             | 23   | -0.295157 | -1.077526 | 0.375679  | 0.833706  | 1.000      |
| 462  | GOBP-RESPONSE-TO-LIPID                            | 19   | -0.308302 | -1.077811 | 0.370130  | 0.836059  | 1.000      |
| 463  | GOBP-LEUKOCYTE-CELL-CELL-ADHESION                 | 6    | -0.425514 | -1.078188 | 0.368906  | 0.838178  | 1.000      |
| 464  | GOBP-REGULATION-OF-MUSCLE-CELL-DIFFERENTIATION    | 6    | -0.431095 | -1.079195 | 0.343711  | 0.838850  | 1.000      |
| 465  | GOBP-REGULATION-OF-PHOSPHOLIPASE-ACTIVITY         | 6    | -0.423051 | -1.083234 | 0.355128  | 0.831018  | 1.000      |
| 466  | GOBP-TRANSMEMBRANE-RECEPTOR-PROTEIN-TYROSINE-K... | 19   | -0.313340 | -1.083444 | 0.350593  | 0.833639  | 1.000      |
| 467  | GOBP-REGULATION-OF-IMMUNE-RESPONSE                | 12   | -0.347654 | -1.083774 | 0.354143  | 0.835929  | 1.000      |
| 468  | GOBP-NEGATIVE-REGULATION-OF-RESPONSE-TO-EXTERN... | 5    | -0.453184 | -1.087272 | 0.371846  | 0.829648  | 1.000      |
| 469  | GOBP-REGULATION-OF-CELLULAR-COMPONENT_SIZE        | 7    | -0.419753 | -1.087560 | 0.338481  | 0.832049  | 1.000      |
| 470  | GOBP-TUBE-MORPHOGENESIS                           | 15   | -0.331361 | -1.087687 | 0.371986  | 0.834947  | 1.000      |
| 471  | GOBP-REGULATION-OF-NEURON-PROJECTION-DEVELOPMENT  | 16   | -0.323705 | -1.089146 | 0.362528  | 0.834554  | 1.000      |
| 472  | GOBP-REGULATION-OF-BODY-FLUID-LEVELS              | 11   | -0.363860 | -1.089924 | 0.352381  | 0.835800  | 1.000      |
| 473  | GOBP-REGULATION-OF-CELL-ADHESION                  | 13   | -0.343324 | -1.091970 | 0.336406  | 0.833430  | 1.000      |
| 474  | GOBP-CIRCADIAN-REGULATION-OF-GENE-EXPRESSION      | 5    | -0.459417 | -1.092222 | 0.348806  | 0.836075  | 1.000      |
| 475  | GOBP-POSITIVE-REGULATION-OF-HYDROLASE-ACTIVITY    | 16   | -0.327479 | -1.092782 | 0.361820  | 0.837935  | 1.000      |
| 476  | GOBP-RESPONSE-TO-CALCIUMION                       | 6    | -0.434908 | -1.094373 | 0.354926  | 0.836920  | 1.000      |
| 477  | GOBP-REGULATION-OF-WNT-SIGNALING-PATHWAY          | 5    | -0.463976 | -1.097482 | 0.339572  | 0.831580  | 1.000      |
| 478  | GOBP-REGULATION-OF-CELLULAR-COMPONENT-BIOGENESIS  | 10   | -0.370041 | -1.099289 | 0.346062  | 0.829890  | 1.000      |
| 479  | REACTOME-NERVOUS-SYSTEM-DEVELOPMENT               | 14   | -0.348415 | -1.099424 | 0.360505  | 0.832808  | 1.000      |
| 480  | GOBP-EXTRINSIC-APOPTOTIC-SIGNALING-PATHWAY        | 7    | -0.417851 | -1.100332 | 0.354381  | 0.833868  | 1.000      |
| 481  | GOBP-RHYTHMIC-PROCESS                             | 15   | -0.340945 | -1.101998 | 0.350457  | 0.832794  | 1.000      |
| 482  | GOBP-DEPHOSPHORYLATION                            | 7    | -0.417454 | -1.103901 | 0.344870  | 0.830715  | 1.000      |
| 483  | GOBP-RESPONSE-TO-INORGANIC-SUBSTANCE              | 19   | -0.372502 | -1.105189 | 0.332230  | 0.830651  | 1.000      |
| 484  | REACTOME-LEISHMANIA-INFECTION                     | 10   | -0.372502 | -1.105448 | 0.324096  | 0.833398  | 1.000      |
| 485  | GOBP-REGULATION-OF-PROTEIN-MODIFICATION-PROCESS   | 28   | -0.293170 | -1.108197 | 0.334398  | 0.828956  | 1.000      |
| 486  | GOBP-REGULATION-OF-ANATOMICAL-STRUCTURE_SIZE      | 10   | -0.373628 | -1.108788 | 0.324675  | 0.830747  | 1.000      |
| 487  | HALLMARK-APOPTOSIS                                | 6    | -0.448852 | -1.109981 | 0.332468  | 0.830973  | 1.000      |
| 488  | REACTOME-INTERLEUKIN_4-AND-INTERLEUKIN_13-SIGN... | 8    | -0.411682 | -1.115441 | 0.328377  | 0.819148  | 1.000      |
| 489  | REACTOME-NUCLEAR-EVENTS-KINASE-AND-TRANSCRIPTI... | 11   | -0.362142 | -1.115987 | 0.310545  | 0.821066  | 1.000      |
| 490  | GOBP-POSITIVE-REGULATION-OF-DEVELOPMENTAL-PROCESS | 32   | -0.294911 | -1.117229 | 0.325926  | 0.820882  | 1.000      |

Continuation of Table S10

| NAME | ID                                                | SIZE | ES        | NES       | NOM.p.val | FDR.q.val | FWER.p.val |
|------|---------------------------------------------------|------|-----------|-----------|-----------|-----------|------------|
| 491  | GOBP-POSITIVE-REGULATION-OF-DEVELOPMENTAL-GROWTH  | 8    | -0.402106 | -1.121619 | 0.313119  | 0.811874  | 1.000      |
| 492  | GOBP-PROTEIN-DEPHOSPHORYLATION                    | 7    | -0.417454 | -1.122295 | 0.319753  | 0.813589  | 1.000      |
| 493  | GOBP-REGULATION-OF-SIGNALING-RECEPTOR-ACTIVITY    | 14   | -0.346317 | -1.123498 | 0.323360  | 0.813942  | 1.000      |
| 494  | GOBP-POSTSYNAPSE-ORGANIZATION                     | 10   | -0.380815 | -1.128150 | 0.300358  | 0.804695  | 1.000      |
| 495  | GOBP-GLUTAMATE-RECEPTOR-SIGNALING-PATHWAY         | 17   | -0.302739 | -1.131786 | 0.320542  | 0.798229  | 1.000      |
| 496  | GOBP-POSITIVE-REGULATION-OF-RESPONSE-TO-EXTERN... | 9    | -0.394845 | -1.132017 | 0.311869  | 0.801034  | 1.000      |
| 497  | GOBP-NEURON-PROJECTION-ORGANIZATION               | 8    | -0.405575 | -1.134759 | 0.311111  | 0.796890  | 1.000      |
| 498  | GOBP-NEGATIVE-REGULATION-OF-GENE-EXPRESSION       | 11   | -0.374993 | -1.135714 | 0.290023  | 0.797817  | 1.000      |
| 499  | GOBP-CELLULAR-RESPONSE-TO-CADMIIUM-ION            | 5    | -0.482215 | -1.138282 | 0.313394  | 0.794154  | 1.000      |
| 500  | GOBP-CELLULAR-RESPONSE-TO-CHEMICAL-STRESS         | 7    | -0.435223 | -1.139501 | 0.295311  | 0.793998  | 1.000      |
| 501  | GOBP-NEGATIVE-REGULATION-OF-CATABOLIC-PROCESS     | 8    | -0.417907 | -1.142143 | 0.296020  | 0.790359  | 1.000      |
| 502  | GOBP-CIRCULATORY-SYSTEM-PROCESS                   | 5    | -0.481928 | -1.144898 | 0.284967  | 0.786259  | 1.000      |
| 503  | REACTOME-CIRCADIAN-CLOCK                          | 5    | -0.481928 | -1.145495 | 0.283784  | 0.788206  | 1.000      |
| 504  | GOBP-REGULATION-OF-POSTSYNAPTIC-MEMBRANE-POTEN... | 14   | -0.354518 | -1.147017 | 0.286517  | 0.787344  | 1.000      |
| 505  | GOBP-CELLULAR-RESPONSE-TO-STARVATION              | 5    | -0.493556 | -1.147262 | 0.276299  | 0.790246  | 1.000      |
| 506  | GOBP-POSITIVE-REGULATION-OF-GROWTH                | 9    | -0.401078 | -1.148445 | 0.293317  | 0.790565  | 1.000      |
| 507  | GOBP-REGULATION-OF-LIPID-METABOLIC-PROCESS        | 7    | -0.437311 | -1.148642 | 0.288010  | 0.793736  | 1.000      |
| 508  | GOBP-CELLULAR-RESPONSE-TO-OXYGEN-CONTAINING.CO... | 29   | -0.307794 | -1.149442 | 0.292994  | 0.795135  | 1.000      |
| 509  | GOBP-RESPONSE-TO-STARVATION                       | 5    | -0.493556 | -1.149999 | 0.292414  | 0.797249  | 1.000      |
| 510  | GOBP-NEGATIVE-REGULATION-OF-ANION-TRANSPORT       | 8    | -0.420526 | -1.153008 | 0.295261  | 0.792549  | 1.000      |
| 511  | GOBP-RESPONSE-TO-ABIOTIC-STIMULUS                 | 27   | -0.310952 | -1.153310 | 0.285093  | 0.795547  | 1.000      |
| 512  | GOBP-HOMEOSTATIC-PROCESS                          | 31   | -0.307208 | -1.153320 | 0.304162  | 0.799253  | 1.000      |
| 513  | GOBP-FAT-CELL-DIFFERENTIATION                     | 9    | -0.403793 | -1.154499 | 0.285542  | 0.799826  | 1.000      |
| 514  | GOBP-OSISIFICATION                                | 9    | -0.409272 | -1.156211 | 0.292121  | 0.798343  | 1.000      |
| 515  | GOBP-CELLULAR-RESPONSE-TO-REACTIVE-OXYGEN-SPECIES | 7    | -0.435223 | -1.156250 | 0.283019  | 0.802035  | 1.000      |
| 516  | GOBP-TELENCEPHALON-DEVELOPMENT                    | 7    | -0.443837 | -1.160992 | 0.291980  | 0.792124  | 1.000      |
| 517  | GOBP-T-CELL-ACTIVATION                            | 8    | -0.435015 | -1.166351 | 0.271122  | 0.780241  | 1.000      |
| 518  | GOBP-REGULATION-OF-GROWTH                         | 13   | -0.362184 | -1.167274 | 0.280138  | 0.781384  | 1.000      |
| 519  | GOBP-MUSCLE-CELL-DIFFERENTIATION                  | 10   | -0.397286 | -1.168011 | 0.272175  | 0.783061  | 1.000      |
| 520  | GOBP-ASSOCIATIVE-LEARNING                         | 7    | -0.444444 | -1.168120 | 0.263488  | 0.786570  | 1.000      |
| 521  | GOBP-PEPTIDYL-LYSINE-MODIFICATION                 | 5    | -0.494318 | -1.173760 | 0.265971  | 0.774111  | 1.000      |
| 522  | GOBP-POSITIVE-REGULATION-OF-PROTEOLYSIS           | 8    | -0.424733 | -1.173811 | 0.251225  | 0.777776  | 1.000      |
| 523  | GOBP-POSITIVE-REGULATION-OF-NEURON-PROJECTION...  | 5    | -0.494436 | -1.175628 | 0.253230  | 0.776401  | 1.000      |
| 524  | GOBP-RESPONSE-TO-LIGHT-STIMULUS                   | 11   | -0.390823 | -1.179917 | 0.243757  | 0.767660  | 1.000      |
| 525  | GOBP-REGULATION-OF-BINDING                        | 11   | -0.389990 | -1.182917 | 0.261176  | 0.763163  | 1.000      |
| 526  | REACTOME-INTERLEUKIN-17-SIGNALING                 | 6    | -0.468932 | -1.184224 | 0.242188  | 0.763462  | 1.000      |
| 527  | REACTOME-SYNAPTIC-ADHESION-LIKE-MOLECULES         | 9    | -0.414349 | -1.186236 | 0.250000  | 0.761257  | 1.000      |
| 528  | GOBP-CENTRAL-NERVOUS-SYSTEM-DEVELOPMENT           | 27   | -0.323851 | -1.191748 | 0.257895  | 0.749443  | 1.000      |
| 529  | GOBP-TRANSMEMBRANE-TRANSPORT                      | 27   | -0.319713 | -1.192429 | 0.239872  | 0.751462  | 1.000      |
| 530  | GOBP-ORGANIC-ACID-TRANSPORT                       | 7    | -0.460695 | -1.193345 | 0.250000  | 0.752860  | 1.000      |
| 531  | GOBP-DEVELOPMENTAL-CELL-GROWTH                    | 5    | -0.501688 | -1.194557 | 0.253989  | 0.753089  | 1.000      |
| 532  | GOBP-CYTOSOLIC-CALCIUM-ION-TRANSPORT              | 7    | -0.457551 | -1.194649 | 0.252551  | 0.756768  | 1.000      |
| 533  | GOBP-GROWTH                                       | 14   | -0.372564 | -1.198095 | 0.242563  | 0.750263  | 1.000      |

Continuation of Table S10

| NAME | ID                                                        | SIZE          | ES | NES       | NOM.p.val | FDR.q.val | FWER.p.val |
|------|-----------------------------------------------------------|---------------|----|-----------|-----------|-----------|------------|
| 534  | GOBP-CELL-GROWTH                                          | GO-0016049    | 10 | -0.415703 | -1.198951 | 0.256691  | 0.751725   |
| 535  | GOBP-TRANSMEMBRANE-RECEPTOR-PROTEIN-SERINE-THR...         | GO-0007178    | 6  | -0.475076 | -1.198962 | 0.247706  | 0.755645   |
| 536  | GOBP-CATION-TRANSMEMBRANE-TRANSPORT                       | GO-0098655    | 18 | -0.352151 | -1.199526 | 0.223451  | 0.758079   |
| 537  | HALLMARK-HYPOXIA                                          | M5891         | 5  | -0.507555 | -1.202818 | 0.232527  | 0.752501   |
| 538  | GOBP-BLOOD-VESSEL-MORPHOGENESIS                           | GO-0048514    | 14 | -0.376051 | -1.205652 | 0.229807  | 0.748633   |
| 539  | GOBP-GLIOGENESIS                                          | GO-0042063    | 12 | -0.398326 | -1.206524 | 0.235916  | 0.750063   |
| 540  | GOBP-CELL-JUNCTION-ASSEMBLY                               | GO-0034329    | 8  | -0.435130 | -1.206575 | 0.245169  | 0.753928   |
| 541  | GOBP-CALCIUM-ION-TRANSMEMBRANE-TRANSPORT                  | GO-0070588    | 7  | -0.457574 | -1.208197 | 0.238095  | 0.753359   |
| 542  | GOBP-REGULATION-OF-LIPID-BIOSYNTHETIC-PROCESS             | GO-0046890    | 6  | -0.488835 | -1.209953 | 0.230971  | 0.752423   |
| 543  | GOBP-REGULATION-OF-GTPASE-ACTIVITY                        | GO-0043087    | 5  | -0.517147 | -1.210823 | 0.237781  | 0.754081   |
| 544  | GOBP-REGULATION-OF-NEUROTRANSMITTER-RECEPTOR-A...         | GO-0099601    | 13 | -0.391989 | -1.217046 | 0.240319  | 0.739530   |
| 545  | GOBP-LIPID-BIOSYNTHETIC-PROCESS                           | GO-0008610    | 6  | -0.488835 | -1.219674 | 0.221785  | 0.735834   |
| 546  | GOBP-REGULATION-OF-SYSTEM-PROCESS                         | GO-0044057    | 18 | -0.351110 | -1.220016 | 0.232123  | 0.738880   |
| 547  | GOBP-CALCIUM-ION-TRANSPORT-INTO-CYTOSOL                   | GO-0060402    | 7  | -0.457574 | -1.221395 | 0.214815  | 0.738616   |
| 548  | GOBP-LIPID-METABOLIC-PROCESS                              | GO-0006629    | 10 | -0.411482 | -1.222056 | 0.195065  | 0.740835   |
| 549  | GOBP-DNA-METABOLIC-PROCESS                                | GO-0006259    | 6  | -0.486969 | -1.224583 | 0.208440  | 0.737443   |
| 550  | GOBP-GENERATION-OF-PRECURSOR-METABOLITES-AND-E...         | GO-0006091    | 5  | -0.518015 | -1.227686 | 0.212435  | 0.732158   |
| 551  | GOBP-CHEMICAL-SYNAPTIC-TRANSMISSION-POSTSYNAPTIC          | GO-0099565    | 9  | -0.434373 | -1.229964 | 0.198565  | 0.729731   |
| 552  | GOBP-REGULATION-OF-TRANSPORTER-ACTIVITY                   | GO-0032409    | 17 | -0.360503 | -1.233270 | 0.221477  | 0.724109   |
| 553  | GOBP-REGULATION-OF-PROTEIN-CATABOLIC-PROCESS              | GO-0042176    | 7  | -0.472901 | -1.233857 | 0.210263  | 0.726783   |
| 554  | GOBP-POLYSACCHARIDE-METABOLIC-PROCESS                     | GO-0005976    | 5  | -0.521907 | -1.234258 | 0.206117  | 0.729835   |
| 555  | GOBP-MULTICELLULAR-ORGANISM-PROCESS                       | GO-0044706    | 8  | -0.445664 | -1.235027 | 0.205845  | 0.731834   |
| 556  | HALLMARK-P13K-AKT-MTOR-SIGNALING                          | M5923         | 6  | -0.485913 | -1.235116 | 0.207947  | 0.735857   |
| 557  | GOBP-RESPONSE-TO-ALKALOID                                 | GO-0043279    | 5  | -0.524692 | -1.235251 | 0.204216  | 0.739886   |
| 558  | GOBP-REGULATION-OF-MEMBRANE-POTENTIAL                     | GO-0042391    | 17 | -0.361744 | -1.235976 | 0.210823  | 0.742088   |
| 559  | GOBP-ENZYME-LINKED-RECEPTOR-PROTEIN-SIGNALING----         | GO-0007167    | 24 | -0.335142 | -1.241271 | 0.203587  | 0.730496   |
| 560  | GOBP-EPITHELIUM-DEVELOPMENT                               | GO-0060429    | 15 | -0.377603 | -1.242585 | 0.205069  | 0.731008   |
| 561  | GOBP-NEGATIVE-REGULATION-OF-TRANSMEMBRANE-TRAN...         | GO-0034763    | 6  | -0.487645 | -1.243878 | 0.213351  | 0.731537   |
| 562  | GOBP-RESPONSE-TO-REACTIVE-OXYGEN-SPECIES                  | GO-0000302    | 8  | -0.457126 | -1.244465 | 0.195062  | 0.734155   |
| 563  | GOBP-PEPTIDE-METABOLIC-PROCESS                            | GO-0006518    | 11 | -0.419616 | -1.248576 | 0.188679  | 0.726292   |
| 564  | GOBP-POSITIVE-REGULATION-OF-DEFENSE-RESPONSE              | GO-0031349    | 5  | -0.529570 | -1.248618 | 0.189225  | 0.730684   |
| 565  | GOBP-MALE-GAMETE-GENERATION                               | GO-0048232    | 5  | -0.524187 | -1.250750 | 0.187761  | 0.728758   |
| 566  | GOBP-CARBOHYDRATE-METABOLIC-PROCESS                       | GO-0005975    | 9  | -0.444401 | -1.251268 | 0.197026  | 0.731789   |
| 567  | GOBP-RESPONSE-TO-OXIDATIVE-STRESS                         | GO-0006979    | 8  | -0.457126 | -1.251360 | 0.195787  | 0.736142   |
| 568  | GOBP-RESPONSE-TO-CARBOHYDRATE                             | GO-0009743    | 5  | -0.534035 | -1.254285 | 0.186508  | 0.731575   |
| 569  | GOBP-ANATOMICAL-STRUCTURE-RECEPTOR-SIGNALING-PATHWAY-I... | GO-0060249    | 7  | -0.467912 | -1.254322 | 0.191595  | 0.736149   |
| 570  | GOBP-CELL-SURFACE-RECEPTOR-SIGNALING-PATHWAY-I...         | GO-1905114    | 15 | -0.389498 | -1.255783 | 0.198228  | 0.736566   |
| 571  | GOBP-OSTEOBLAST-DIFFERENTIATION                           | GO-0001649    | 15 | -0.536696 | -1.257891 | 0.181586  | 0.734822   |
| 572  | GOBP-NEGATIVE-REGULATION-OF-MOLECULAR-FUNCTION            | GO-0044092    | 24 | -0.339132 | -1.257925 | 0.200662  | 0.739501   |
| 573  | GOBP-REGULATION-OF-RESPONSE-TO-EXTERNAL-STIMULUS          | GO-0032101    | 15 | -0.378443 | -1.259602 | 0.186020  | 0.739071   |
| 574  | REACTOME-MAPK-FAMILY-SIGNALING-CASCADES                   | R-RNO-5683057 | 12 | -0.408721 | -1.260498 | 0.183432  | 0.740967   |
| 575  | GOBP-CELLULAR-RESPONSE-TO-LIPID                           | GO-0071396    | 15 | -0.380553 | -1.261367 | 0.197714  | 0.743066   |
| 576  | GOBP-TEMPERATURE-HOMEOSTASIS                              | GO-0001659    | 5  | -0.533074 | -1.261925 | 0.183727  | 0.746142   |



Continuation of Table S10

| NAME | ID                                                | SIZE | ES        | NES       | NOM.p.val | FDR.q.val | FWER.p.val |
|------|---------------------------------------------------|------|-----------|-----------|-----------|-----------|------------|
| 577  | GOBP-HOMEOSTASIS_OF_NUMBER_OF_CELLS               | 5    | -0.529772 | -1.264395 | 0.169168  | 0.743679  | 1.000      |
| 578  | GOBP-CELLULAR_RESPONSE_TO ABIOTIC-STIMULUS        | 7    | -0.475198 | -1.265220 | 0.167949  | 0.746010  | 1.000      |
| 579  | GOBP-POSITIVE REGULATION_OF_GLIOGENESIS           | 5    | -0.531087 | -1.266455 | 0.169786  | 0.747328  | 1.000      |
| 580  | GOBP-LEARNING                                     | 13   | -0.408207 | -1.266534 | 0.175115  | 0.752185  | 1.000      |
| 581  | REACTOME-NEUREXINS-AND-NEUROLIGINS                | 9    | -0.450544 | -1.267525 | 0.198529  | 0.754390  | 1.000      |
| 582  | GOBP-POSITIVE REGULATION_OF DNA BINDING_TRANSC... | 10   | -0.421739 | -1.267554 | 0.197115  | 0.759540  | 1.000      |
| 583  | GOBP-REGULATION_OF_NERVOUS_SYSTEM_PROCESS         | 8    | -0.464109 | -1.269537 | 0.170581  | 0.758236  | 1.000      |
| 584  | GOBP-EMBRYONIC MORPHOGENESIS                      | 6    | -0.498796 | -1.269686 | 0.168659  | 0.763139  | 1.000      |
| 585  | GOBP-DEVELOPMENTAL GROWTH                         | 10   | -0.423749 | -1.270105 | 0.184431  | 0.767241  | 1.000      |
| 586  | GOBP-REGULATION_OF_GLIOGENESIS                    | 5    | -0.531087 | -1.271011 | 0.181217  | 0.769877  | 1.000      |
| 587  | GOBP-RESPONSE_TO_OXYGEN LEVELS                    | 8    | -0.458119 | -1.271251 | 0.199504  | 0.774609  | 1.000      |
| 588  | GOBP-MEMBRANE PROTEIN PROTEOLYSIS                 | 6    | -0.507726 | -1.278903 | 0.167500  | 0.755035  | 1.000      |
| 589  | GOBP-NEGATIVE REGULATION_OF PHOSPHORYLATION       | 7    | -0.484115 | -1.280218 | 0.171795  | 0.756080  | 1.000      |
| 590  | GOBP-RESPONSE_TO MONOSACCHARIDE                   | 5    | -0.534035 | -1.284175 | 0.154248  | 0.748711  | 1.000      |
| 591  | GOBP-REGULATION_OF PROTEIN LOCALIZATION_TO MEM... | 7    | -0.491644 | -1.284911 | 0.169742  | 0.751987  | 1.000      |
| 592  | GOBP-REPRODUCTIVE SYSTEM DEVELOPMENT              | 6    | -0.507860 | -1.290239 | 0.160622  | 0.740680  | 1.000      |
| 593  | GOBP-CELL CYCLE                                   | 21   | -0.361266 | -1.294390 | 0.162338  | 0.732485  | 1.000      |
| 594  | GOBP-POSITIVE REGULATION_OF CYTOKINE PRODUCTION   | 7    | -0.492671 | -1.295938 | 0.155303  | 0.733084  | 1.000      |
| 595  | GOBP-NEGATIVE REGULATION_OF PHOSPHORUS METABOL... | 9    | -0.459155 | -1.298443 | 0.159420  | 0.730495  | 1.000      |
| 596  | GOBP-REGULATION_OF_CELL DEVELOPMENT               | 15   | -0.395378 | -1.305644 | 0.162870  | 0.712249  | 1.000      |
| 597  | GOBP-DEFENSE RESPONSE_TO_OTHER ORGANISM           | 9    | -0.458029 | -1.306437 | 0.168246  | 0.715316  | 1.000      |
| 598  | GOBP-STRATIATED MUSCLE CELL DIFFERENTIATION       | 9    | -0.457695 | -1.310346 | 0.138012  | 0.707658  | 1.000      |
| 599  | GOBP-POSITIVE REGULATION_OF NEURON DEATH          | 5    | -0.558999 | -1.313916 | 0.123684  | 0.701518  | 1.000      |
| 600  | GOBP-SEXUAL REPRODUCTION                          | 10   | -0.443052 | -1.318118 | 0.141119  | 0.693240  | 1.000      |
| 601  | GOBP-REGULATION_OF MAPK CASCADE                   | 13   | -0.417588 | -1.321482 | 0.144330  | 0.688323  | 1.000      |
| 602  | REACTOME-PROTEIN-PROTEIN INTERACTIONS AT SYNAPSES | 12   | -0.426543 | -1.322381 | 0.142191  | 0.691091  | 1.000      |
| 603  | GOBP-POSITIVE REGULATION_OF NEUROGENESIS          | 12   | -0.435647 | -1.325748 | 0.156398  | 0.686159  | 1.000      |
| 604  | GOBP-REGULATION_OF DNA BINDING_TRANSCRIPTION F... | 16   | -0.400618 | -1.331179 | 0.146893  | 0.674755  | 1.000      |
| 605  | GOBP-CELLULAR COMPONENT MAINTENANCE               | 5    | -0.554217 | -1.332403 | 0.127688  | 0.676482  | 1.000      |
| 606  | GOBP-REGULATION_OF MAP_KINASE ACTIVITY            | 9    | -0.466486 | -1.335335 | 0.123609  | 0.673049  | 1.000      |
| 607  | GOBP-TISSUE HOMEOSTASIS                           | 5    | -0.569047 | -1.336046 | 0.118170  | 0.676356  | 1.000      |
| 608  | GOBP-EXCITATORY CHEMICAL SYNAPTIC TRANSMISSION    | 5    | -0.566265 | -1.338878 | 0.127027  | 0.672802  | 1.000      |
| 609  | GOBP-PROTEOLYSIS                                  | 17   | -0.400677 | -1.343693 | 0.132353  | 0.662858  | 1.000      |
| 610  | GOBP-CELLULAR AMIDE METABOLIC PROCESS             | 12   | -0.440920 | -1.345630 | 0.118624  | 0.662289  | 1.000      |
| 611  | GOBP-POSITIVE REGULATION_OF NERVOUS SYSTEM DEV... | 12   | -0.435647 | -1.347126 | 0.126874  | 0.663629  | 1.000      |
| 612  | GOBP-POSITIVE REGULATION_OF_CELL DEVELOPMENT      | 12   | -0.435647 | -1.348094 | 0.119266  | 0.666504  | 1.000      |
| 613  | GOBP-NEGATIVE REGULATION_OF TRANSFERASE ACTIVITY  | 5    | -0.567320 | -1.348916 | 0.107374  | 0.669835  | 1.000      |
| 614  | GOBP-RESPONSE_TO ACID-CHEMICAL                    | 6    | -0.540298 | -1.350641 | 0.128827  | 0.670002  | 1.000      |
| 615  | GOBP-NEGATIVE REGULATION_OF KINASE ACTIVITY       | 5    | -0.567320 | -1.352262 | 0.130319  | 0.671002  | 1.000      |
| 616  | GOBP-ENDOCRINE SYSTEM DEVELOPMENT                 | 6    | -0.544967 | -1.353699 | 0.121019  | 0.672398  | 1.000      |
| 617  | REACTOME-ADAPTIVE IMMUNE SYSTEM                   | 9    | -0.479020 | -1.354940 | 0.125604  | 0.674344  | 1.000      |
| 618  | GOBP-REGULATION_OF_CELL DIFFERENTIATION           | 36   | -0.354908 | -1.357724 | 0.109589  | 0.671399  | 1.000      |
| 619  | GOBP-RESPONSE_TO MOLECULE OF BACTERIAL ORIGIN     | 13   | -0.426628 | -1.359718 | 0.124717  | 0.671509  | 1.000      |

Continuation of Table S10

|     | NAME                                              | ID            | SIZE | ES        | NES       | NOM.p.val | FDR.q.val | FWER.p.val |
|-----|---------------------------------------------------|---------------|------|-----------|-----------|-----------|-----------|------------|
| 620 | GOBP-MUSCLE-CELL-DEVELOPMENT                      | GO-0055001    | 5    | -0.575080 | -1.360765 | 0.124021  | 0.674221  | 1.000      |
| 621 | GOBP-MAINTENANCE-OF-LOCATION                      | GO-0051235    | 7    | -0.518681 | -1.363608 | 0.118987  | 0.671265  | 1.000      |
| 622 | GOBP-EPHRIN-RECEPTOR-SIGNALING-PATHWAY            | GO-0048013    | 5    | -0.579619 | -1.363899 | 0.106860  | 0.676852  | 1.000      |
| 623 | GOBP-RESPONSE-TO-RADIATION                        | GO-0009314    | 13   | -0.425259 | -1.364248 | 0.114155  | 0.682350  | 1.000      |
| 624 | GOBP-REGULATION-OF-CELL-CYCLE                     | GO-0051726    | 13   | -0.431755 | -1.364761 | 0.105324  | 0.687555  | 1.000      |
| 625 | GOBP-NUCLEAR-TRANSPORT                            | GO-0051169    | 5    | -0.579672 | -1.365935 | 0.112299  | 0.690582  | 1.000      |
| 626 | GOBP-NEGATIVE-REGULATION-OF-MULTICELLULAR-ORGA... | GO-0051241    | 15   | -0.419828 | -1.368762 | 0.108945  | 0.688183  | 1.000      |
| 627 | GOBP-GLAND-DEVELOPMENT                            | GO-0048732    | 7    | -0.516818 | -1.369349 | 0.116688  | 0.693296  | 1.000      |
| 628 | GOBP-RESPONSE-TO-INSULIN                          | GO-0032868    | 5    | -0.580450 | -1.370812 | 0.105882  | 0.695571  | 1.000      |
| 629 | GOBP-CELLULAR-RESPONSE-TO-ORGANIC-CYCLIC-COMPOUND | GO-0071407    | 13   | -0.429510 | -1.374165 | 0.112903  | 0.691322  | 1.000      |
| 630 | GOBP-AMYLOID-PRECURSOR-PROTEIN-METABOLIC-PROCESS  | GO-0042982    | 5    | -0.591906 | -1.374238 | 0.115735  | 0.698307  | 1.000      |
| 631 | GOBP-REGULATION-OF-NEUROGENESIS                   | GO-0050767    | 14   | -0.427392 | -1.374314 | 0.099429  | 0.705545  | 1.000      |
| 632 | GOBP-NEGATIVE-REGULATION-OF-BINDING               | GO-0051100    | 6    | -0.553052 | -1.377020 | 0.102302  | 0.704180  | 1.000      |
| 633 | REACTOME-TRANSCRIPTIONAL-REGULATION-BY-TP53       | R-RNO-3700989 | 6    | -0.551622 | -1.377981 | 0.105882  | 0.701299  | 1.000      |
| 634 | REACTOME-TRANSCRIPTIONAL-REGULATION-OF-WHITE-A... | R-RNO-381340  | 6    | -0.550990 | -1.385444 | 0.100000  | 0.689177  | 1.000      |
| 635 | GOBP-RESPONSE-TO-BACTERIUM                        | GO-0009617    | 13   | -0.426628 | -1.386959 | 0.098751  | 0.691787  | 1.000      |
| 636 | GOBP-AMYLOID-BETA-METABOLIC-PROCESS               | GO-0050435    | 5    | -0.591906 | -1.389481 | 0.085979  | 0.690987  | 1.000      |
| 637 | GOBP-RESPONSE-TO-METABOLIC-STIMULUS               | GO-0009612    | 6    | -0.549972 | -1.390586 | 0.100128  | 0.694990  | 1.000      |
| 638 | GOBP-POSITIVE-REGULATION-OF-TRANSCRIPTION-BY-R... | GO-0045944    | 24   | -0.379912 | -1.391704 | 0.090513  | 0.699176  | 1.000      |
| 639 | GOBP-MULTICELLULAR-ORGANISMAL-HOMEOSTASIS         | GO-0048871    | 12   | -0.446302 | -1.395349 | 0.111507  | 0.694320  | 1.000      |
| 640 | GOBP-RESPONSE-TO-BIOTIC-STIMULUS                  | GO-0009607    | 17   | -0.418454 | -1.396798 | 0.094655  | 0.697301  | 1.000      |
| 641 | GOBP-INTRACELLULAR-RECEPTOR-SIGNALING-PATHWAY     | GO-0030522    | 5    | -0.587159 | -1.399064 | 0.104698  | 0.697198  | 1.000      |
| 642 | GOBP-PRL-MIRNA-TRANSCRIPTION-BY-RNA-POLYMERASE-II | GO-0061614    | 7    | -0.539743 | -1.402169 | 0.086101  | 0.693956  | 1.000      |
| 643 | GOBP-NEGATIVE-REGULATION-OF-RESPONSE-TO-STIMULUS  | GO-0045853    | 16   | -0.422233 | -1.403473 | 0.096591  | 0.697519  | 1.000      |
| 644 | REACTOME-INNATE-IMMUNE-SYSTEM                     | R-RNO-168249  | 16   | -0.417786 | -1.404493 | 0.093541  | 0.702132  | 1.000      |
| 645 | GOBP-AMYLOID-PRECURSOR-PROTEIN-CATABOLIC-PROCESS  | GO-0042987    | 5    | -0.591906 | -1.404896 | 0.098404  | 0.709548  | 1.000      |
| 646 | GOBP-NEGATIVE-REGULATION-OF-NUCLEOBASE-CONTAIN... | GO-0045934    | 13   | -0.445136 | -1.418345 | 0.094907  | 0.669908  | 1.000      |
| 647 | REACTOME-L1CAM-INTERACTIONS                       | R-RNO-373760  | 5    | -0.594714 | -1.419588 | 0.085752  | 0.674160  | 1.000      |
| 648 | GOBP-REGULATION-OF-DEVELOPMENTAL-GROWTH           | GO-0048638    | 9    | -0.489745 | -1.421006 | 0.082339  | 0.678127  | 1.000      |
| 649 | GOBP-POSITIVE-REGULATION-OF-PRL-MIRNA-TRANSCRI... | GO-1902895    | 7    | -0.539743 | -1.429396 | 0.075738  | 0.657644  | 1.000      |
| 650 | GOBP-IONOTROPIC-GLUTAMATE-RECEPTOR-SIGNALING-P... | GO-0035235    | 9    | -0.504775 | -1.438119 | 0.083233  | 0.636544  | 1.000      |
| 651 | GOBP-PROTEIN-MODIFICATION-BY-SMALL-PROTEIN-CON... | GO-0032446    | 6    | -0.575895 | -1.438750 | 0.073491  | 0.643001  | 1.000      |
| 652 | GOBP-GAMETE-GENERATION                            | GO-0007276    | 9    | -0.513086 | -1.438868 | 0.086480  | 0.651357  | 1.000      |
| 653 | GOBP-CELLULAR-RESPONSE-TO-EXTRACELLULAR-STIMULUS  | GO-0031668    | 8    | -0.536060 | -1.442127 | 0.088378  | 0.648002  | 1.000      |
| 654 | GOBP-REGULATION-OF-PROTEIN-SERINE-THREONINE-KI... | GO-0071900    | 12   | -0.467172 | -1.443003 | 0.082654  | 0.654186  | 1.000      |
| 655 | GOBP-REGULATION-OF-CELLULAR-AMIDE-METABOLIC-PR... | GO-0034248    | 9    | -0.507164 | -1.445152 | 0.078883  | 0.655805  | 1.000      |
| 656 | GOBP-REGULATION-OF-MULTICELLULAR-ORGANISMAL-DE... | GO-2000026    | 31   | -0.379564 | -1.447050 | 0.069189  | 0.658550  | 1.000      |
| 657 | GOBP-NEGATIVE-REGULATION-OF-INTRACELLULAR-SIGN... | GO-1902532    | 7    | -0.548625 | -1.448399 | 0.084054  | 0.663723  | 1.000      |
| 658 | GOBP-IMPORT-INTO-CELL                             | GO-0098657    | 6    | -0.584713 | -1.451937 | 0.058278  | 0.660618  | 1.000      |
| 659 | GOBP-POSITIVE-REGULATION-OF-CELL-DIFFERENTIATION  | GO-0034597    | 27   | -0.392753 | -1.452230 | 0.069767  | 0.669521  | 1.000      |
| 660 | GOBP-RESPONSE-TO-TUMOR-NECROSIS-FACTOR            | GO-0034612    | 7    | -0.555600 | -1.463283 | 0.072822  | 0.638260  | 1.000      |
| 661 | REACTOME-FC-EPSILON-RECEPTOR-FCER1-SIGNALING      | R-RNO-2454202 | 7    | -0.563379 | -1.466777 | 0.073698  | 0.635173  | 1.000      |
| 662 | GOBP-COAGULATION                                  | GO-0050817    | 8    | -0.538641 | -1.468227 | 0.072319  | 0.640218  | 1.000      |

Continuation of Table S10

|     | NAME                                                | ID            | SIZE | ES        | NES       | NOM.p.val | FDR.q.val | FWER.p.val |
|-----|-----------------------------------------------------|---------------|------|-----------|-----------|-----------|-----------|------------|
| 663 | GOBP-RESPONSE.TO.INTERLEUKIN.1                      | GO-0070555    | 5    | -0.610610 | -1.470030 | 0.067974  | 0.643565  | 1.000      |
| 664 | GOBP-NEGATIVE-REGULATION-OF-PROTEIN-METABOLIC-...   | GO-0051248    | 20   | -0.413824 | -1.470491 | 0.057175  | 0.652406  | 1.000      |
| 665 | HALLMARK-TNFA-SIGNALING-VIA-NFKB                    | M5890         | 14   | -0.461190 | -1.475459 | 0.066069  | 0.644694  | 1.000      |
| 666 | GOBP-MONONUCLEAR-CELL-DIFFERENTIATION               | GO-1903131    | 7    | -0.580466 | -1.476975 | 0.086903  | 0.650004  | 1.000      |
| 667 | GOBP-REPRODUCTION                                   | GO-0000003    | 18   | -0.430579 | -1.481878 | 0.053333  | 0.642502  | 1.000      |
| 668 | GOBP-RESPONSE.TO.OXYGEN-CONTAINING-COMPOUND         | GO-1901700    | 39   | -0.385835 | -1.482274 | 0.056114  | 0.652491  | 1.000      |
| 669 | GOBP-REGULATION-OF-NERVOUS-SYSTEM-DEVELOPMENT       | GO-0051960    | 15   | -0.452406 | -1.485541 | 0.057303  | 0.651253  | 1.000      |
| 670 | REACTOME-TOLL-LIKE-RECEPTOR-TLR1-TLR2-CASCADE       | R-RNO-168179  | 8    | -0.548139 | -1.487205 | 0.060991  | 0.657311  | 1.000      |
| 671 | GOBP-MUSCLE-CONTRACTION                             | GO-0006936    | 5    | -0.634728 | -1.494381 | 0.064603  | 0.642431  | 1.000      |
| 672 | GOBP-FC-EPSILON-RECEPTOR-SIGNALING-PATHWAY          | GO-0038095    | 7    | -0.563379 | -1.498453 | 0.039390  | 0.639404  | 1.000      |
| 673 | GOBP-SENSORY-ORGAN-DEVELOPMENT                      | GO-0007423    | 8    | -0.549151 | -1.503507 | 0.049689  | 0.633504  | 1.000      |
| 674 | GOBP-NEGATIVE-REGULATION-OF-PROTEIN-MODIFICATION... | GO-0031400    | 10   | -0.504088 | -1.503823 | 0.057075  | 0.644809  | 1.000      |
| 675 | REACTOME-MYD88-INDEPENDENT-TLR4-CASCADE             | R-RNO-166166  | 8    | -0.548139 | -1.505562 | 0.043956  | 0.651107  | 1.000      |
| 676 | REACTOME-SIGNALING-BY-INTERLEUKINS                  | R-RNO-449147  | 15   | -0.460942 | -1.512339 | 0.060364  | 0.638254  | 1.000      |
| 677 | GOBP-PROTEIN-AUTOPHOSPHORYLATION                    | GO-0040777    | 5    | -0.651508 | -1.512554 | 0.038513  | 0.650658  | 1.000      |
| 678 | REACTOME-TOLL-LIKE-RECEPTOR-CASCADES                | R-RNO-168898  | 8    | -0.548139 | -1.515488 | 0.058531  | 0.652903  | 1.000      |
| 679 | REACTOME-TOLL-LIKE-RECEPTOR-9-TLR9-CASCADE          | R-RNO-168138  | 8    | -0.548139 | -1.517552 | 0.056180  | 0.658529  | 1.000      |
| 680 | GOBP-REGULATION-OF-PROTEIN-LOCALIZATION.TO.CEL...   | GO-1904375    | 6    | -0.589519 | -1.520005 | 0.041184  | 0.663322  | 1.000      |
| 681 | REACTOME-DEVELOPMENTAL-BIOLOGY                      | R-RNO-1266738 | 22   | -0.431203 | -1.527839 | 0.051780  | 0.648015  | 1.000      |
| 682 | GOBP-VASCULATURE-DEVELOPMENT                        | GO-0001944    | 17   | -0.454094 | -1.544242 | 0.038889  | 0.601383  | 1.000      |
| 683 | REACTOME-CYTOKINE-SIGNALING-IN-IMMUNE-SYSTEM        | R-RNO-1280215 | 21   | -0.445101 | -1.544747 | 0.027233  | 0.613704  | 1.000      |
| 684 | REACTOME-EPH-EPHRIN-SIGNALING                       | R-RNO-268233  | 6    | -0.605914 | -1.545544 | 0.051680  | 0.625601  | 1.000      |
| 685 | GOBP-CELLULAR-RESPONSE.TO-MOLECULE-OF-BACTERIA...   | GO-0071219    | 8    | -0.564782 | -1.546037 | 0.042787  | 0.639417  | 1.000      |
| 686 | GOBP-POSITIVE-REGULATION-OF-MULTICELLULAR_ORGA...   | GO-0051240    | 32   | -0.402424 | -1.551042 | 0.037473  | 0.635967  | 1.000      |
| 687 | GOBP-RESPONSE.TO-CYTOKINE                           | GO-0034097    | 23   | -0.427778 | -1.552018 | 0.044565  | 0.648442  | 1.000      |
| 688 | GOBP-POSITIVE-REGULATION-OF-NUCLEOBASE-CONTAIN...   | GO-0045935    | 28   | -0.417179 | -1.555679 | 0.032258  | 0.650075  | 1.000      |
| 689 | GOBP-CELLULAR-RESPONSE.TO-BIOTIC-STIMULUS           | GO-0071216    | 8    | -0.564782 | -1.560310 | 0.035409  | 0.649493  | 1.000      |
| 690 | GOBP-GLIAL-CELL-DIFFERENTIATION                     | GO-0010001    | 10   | -0.533520 | -1.560560 | 0.041225  | 0.666713  | 1.000      |
| 691 | GOBP-POSITIVE-REGULATION-OF-GENE-EXPRESSION         | GO-0010628    | 16   | -0.466790 | -1.564181 | 0.039282  | 0.671026  | 1.000      |
| 692 | GOBP-INNATE-IMMUNE-RESPONSE                         | GO-0045087    | 7    | -0.587317 | -1.565076 | 0.033088  | 0.686940  | 1.000      |
| 693 | GOBP-POSITIVE-REGULATION-OF-BIOSYNTHETIC-PROCESS    | GO-0009891    | 27   | -0.422646 | -1.567580 | 0.034079  | 0.697514  | 1.000      |
| 694 | GOBP-PROTEIN-MODIFICATION-BY-SMALL-PROTEIN-CON...   | GO-0070647    | 7    | -0.610735 | -1.571455 | 0.020779  | 0.702460  | 1.000      |
| 695 | GOBP-ANIMAL-ORGAN-MORPHOGENESIS                     | GO-0009887    | 12   | -0.512549 | -1.584745 | 0.034118  | 0.670030  | 1.000      |
| 696 | GOBP-RESPONSE.TO-ORGANIC-CYCLIC-COMPOUND            | GO-0014070    | 20   | -0.450509 | -1.591954 | 0.029412  | 0.662038  | 1.000      |
| 697 | GOBP-RESPONSE.TO-NUTRIENT                           | GO-0007584    | 5    | -0.685809 | -1.592299 | 0.036096  | 0.683969  | 1.000      |
| 698 | GOBP-SKELETAL-MUSCLE-ORGAN-DEVELOPMENT              | GO-0060538    | 5    | -0.662651 | -1.592826 | 0.031496  | 0.707263  | 1.000      |
| 699 | REACTOME-CELLULAR-SENESCENCE                        | R-RNO-2559583 | 6    | -0.635771 | -1.597409 | 0.029793  | 0.711672  | 1.000      |
| 700 | GOBP-NEGATIVE-REGULATION-OF-BIOSYNTHETIC-PROCESS    | GO-0009890    | 13   | -0.501403 | -1.597435 | 0.022910  | 0.740058  | 1.000      |
| 701 | REACTOME-SENESCENCE-ASSOCIATED-SECRETORY-PHENO...   | R-RNO-2559582 | 6    | -0.635771 | -1.604546 | 0.030303  | 0.734571  | 1.000      |
| 702 | GOBP-FC-RECEPTOR-SIGNALING-PATHWAY                  | GO-0038093    | 8    | -0.585707 | -1.611141 | 0.024722  | 0.732085  | 1.000      |
| 703 | GOBP-IMMUNE-RESPONSE-REGULATING-SIGNALING-PATHWAY   | GO-000276     | 8    | -0.585707 | -1.615680 | 0.035714  | 0.743025  | 1.000      |
| 704 | GOBP-MAPK-CASCADE                                   | GO-0000165    | 18   | -0.472144 | -1.619633 | 0.031710  | 0.757535  | 1.000      |
| 705 | GOBP-ACTIVATION-OF-IMMUNE-RESPONSE                  | GO-0002253    | 5    | -0.686490 | -1.622097 | 0.021136  | 0.782588  | 1.000      |

| Continuation of Table S10                             |               |      |           |           |           |           |            |
|-------------------------------------------------------|---------------|------|-----------|-----------|-----------|-----------|------------|
| NAME                                                  | ID            | SIZE | ES        | NES       | NOM.p.val | FDR.q.val | FWER.p.val |
| 706 GOBP-CELLULAR-RESPONSE-TO-EXTERNAL-STIMULUS       | GO-0071496    | 10   | -0.560067 | -1.623904 | 0.023143  | 0.813685  | 1.000      |
| 707 GOBP-EMBRYO-DEVELOPMENT-ENDING-IN-BIRTH-OR-EGG... | GO-0009792    | 9    | -0.575492 | -1.633763 | 0.020408  | 0.803747  | 1.000      |
| 708 GOBP-CYTOKINE-MEDIATED-SIGNALING-PATHWAY          | GO-0019221    | 16   | -0.491688 | -1.636183 | 0.022198  | 0.836990  | 1.000      |
| 709 GOBP-MUSCLE-TISSUE-DEVELOPMENT                    | GO-0060537    | 11   | -0.541374 | -1.639085 | 0.026590  | 0.873023  | 1.000      |
| 710 GOBP-NEGATIVE-REGULATION-OF-TRANSCRIPTION-BY-R... | GO-0000122    | 10   | -0.564503 | -1.639437 | 0.025362  | 0.929092  | 1.000      |
| 711 GOBP-DEVELOPMENTAL-PROCESS-INVOLVED-IN-REPRODU... | GO-0003006    | 11   | -0.547095 | -1.653222 | 0.019653  | 0.902553  | 1.000      |
| 712 GOBP-MATERNAL-PROCESS-INVOLVED-IN-FEMALE-PREGN... | GO-0060135    | 5    | -0.710804 | -1.665547 | 0.018692  | 0.892859  | 0.999      |
| 713 GOBP-SKIN-DEVELOPMENT                             | GO-0043588    | 5    | -0.702984 | -1.689212 | 0.015027  | 0.812773  | 0.998      |
| 714 GOBP-CIRCULATORY-SYSTEM-DEVELOPMENT               | GO-0072359    | 21   | -0.482465 | -1.694184 | 0.015284  | 0.855002  | 0.998      |
| 715 GOBP-IN-UTERO-EMBRYONIC-DEVELOPMENT               | GO-0001701    | 8    | -0.618549 | -1.697652 | 0.017566  | 0.916660  | 0.998      |
| 289 REACTOME-NGF-STIMULATED-TRANSCRIPTION             | R-RNO-9031628 | 9    | 0.353930  | 0.942122  | 0.521880  | 0.901241  | 1.000      |
| 716 GOBP-RESPONSE-TO-EXTRACELLULAR-STIMULUS           | GO-0009991    | 13   | -0.531490 | -1.703521 | 0.017281  | 0.976334  | 0.998      |
| 717 GOBP-REGULATION-OF-ORGAN-GROWTH                   | GO-0046620    | 5    | -0.724434 | -1.712719 | 0.009044  | 1.000000  | 0.996      |
| 718 GOBP-EMBRYONIC-ORGAN-DEVELOPMENT                  | GO-0048568    | 7    | -0.659482 | -1.715278 | 0.020000  | 1.000000  | 0.996      |
| 719 GOBP-ORGAN-GROWTH                                 | GO-0035265    | 5    | -0.724434 | -1.718715 | 0.015424  | 1.000000  | 0.996      |
| 720 GOBP-EMBRYO-DEVELOPMENT                           | GO-0009790    | 14   | -0.536858 | -1.741192 | 0.021542  | 1.000000  | 0.996      |
| 721 GOBP-HEART-DEVELOPMENT                            | GO-0007507    | 6    | -0.695437 | -1.741786 | 0.010178  | 1.000000  | 0.996      |
| 722 GOBP-CARDIAC-MUSCLE-TISSUE-DEVELOPMENT            | GO-0048738    | 6    | -0.695437 | -1.746402 | 0.010390  | 1.000000  | 0.996      |
| 723 GOBP-MULTICELLULAR-ORGANISM-REPRODUCTION          | GO-0032504    | 12   | -0.569524 | -1.764001 | 0.014068  | 1.000000  | 0.992      |
| 724 REACTOME-P-TEN-REGULATION                         | R-RNO-6807070 | 5    | -0.754674 | -1.777577 | 0.006402  | 1.000000  | 0.990      |
| End of Table                                          |               |      |           |           |           |           |            |

Supplementary Table S11: CTX-M early profile (1 DPL peak) GSEA results.

| Begin of Table S11 |                                                    |               |      |          |          |           |           |            |  |
|--------------------|----------------------------------------------------|---------------|------|----------|----------|-----------|-----------|------------|--|
|                    | NAME                                               | ID            | SIZE | ES       | NES      | NOM.p.val | FDR.q.val | FWER.p.val |  |
| 0                  | GOBP-REGULATION-OF-NEURONAL-SYNAPTIC-PLASTICITY    | GO-0048168    | 7    | 0.781099 | 1.916008 | 0.000000  | 0.512575  | 0.545      |  |
| 1                  | REACTOME-NEGATIVE-REGULATION-OF-NMDA-RECEPTOR-...  | R-HSA-9617324 | 8    | 0.740255 | 1.915856 | 0.005226  | 0.257571  | 0.546      |  |
| 2                  | REACTOME-UNBLOCKING-OF-NMDA-RECEPTORS-GLUTAMAT...  | R-RNO-438066  | 12   | 0.643641 | 1.885993 | 0.005367  | 0.231565  | 0.663      |  |
| 3                  | REACTOME-ASSEMBLY-AND-CELL-SURFACE-PRESENTATIO...  | R-RNO-9609736 | 8    | 0.740255 | 1.870816 | 0.001812  | 0.201931  | 0.719      |  |
| 4                  | REACTOME-SYNAPTIC-ADHESION-LIKE-MOLECULES          | R-RNO-8849932 | 9    | 0.652410 | 1.695269 | 0.013889  | 0.793753  | 1.000      |  |
| 5                  | REACTOME-RAS-ACTIVATION-UPON-CA2-INFLUX-THROUGH... | R-HSA-442982  | 6    | 0.718701 | 1.666102 | 0.018416  | 0.828941  | 1.000      |  |
| 6                  | GOBP-CELL-SURFACE-RECEPTOR-SIGNALING-PATHWAY_I...  | GO-1905114    | 15   | 0.526334 | 1.651526 | 0.024561  | 0.795491  | 1.000      |  |
| 7                  | REACTOME-LONG-TERM-POTENTIATION                    | R-HSA-9620244 | 10   | 0.591587 | 1.630903 | 0.031414  | 0.805733  | 1.000      |  |
| 8                  | REACTOME-TRANSMISSION-ACROSS-CHEMICAL-SYNAPSES     | R-RNO-112315  | 23   | 0.468524 | 1.628466 | 0.026891  | 0.728449  | 1.000      |  |
| 9                  | REACTOME-ACTIVATION-OF-NMDA-RECEPTORS-AND-POST...  | R-RNO-442755  | 16   | 0.513227 | 1.573137 | 0.028053  | 0.961150  | 1.000      |  |
| 10                 | GOBP-POSTSYNAPSE-ORGANIZATION                      | GO-0099173    | 10   | 0.566282 | 1.569294 | 0.043478  | 0.895008  | 1.000      |  |
| 11                 | REACTOME-NEURONAL-SYSTEM                           | R-RNO-112316  | 26   | 0.446338 | 1.561307 | 0.028862  | 0.866438  | 1.000      |  |
| 12                 | GOBP-RESPONSE-TO-ALCOHOL                           | GO-0097305    | 11   | 0.545978 | 1.559732 | 0.033748  | 0.806638  | 1.000      |  |
| 13                 | GOBP-REGULATION-OF-SYNAPTIC-PLASTICITY             | GO-0048167    | 21   | 0.460294 | 1.558922 | 0.030822  | 0.753051  | 1.000      |  |
| 14                 | GOBP-RESPONSE-TO-ETHANOL                           | GO-0045471    | 5    | 0.718747 | 1.553164 | 0.033028  | 0.729094  | 1.000      |  |
| 15                 | REACTOME-MAPK-FAMILY-SIGNALING-CASCADES            | R-RNO-5683057 | 12   | 0.526082 | 1.525754 | 0.049296  | 0.814406  | 1.000      |  |
| 16                 | GOBP-EXCITATORY-CHEMICAL-SYNAPTIC-TRANSMISSION     | GO-0098976    | 5    | 0.703966 | 1.522089 | 0.049360  | 0.785421  | 1.000      |  |
| 17                 | REACTOME-NEUROTRANSMITTER-RECEPTORS-AND-POSTSY...  | R-RNO-112314  | 22   | 0.438207 | 1.497067 | 0.043253  | 0.866216  | 1.000      |  |
| 18                 | REACTOME-PROTEIN-PROTEIN-INTERACTIONS-AT-SYNAPSES  | R-RNO-6794362 | 12   | 0.523716 | 1.493978 | 0.066087  | 0.835384  | 1.000      |  |
| 19                 | GOBP-IONOTROPIC-GLUTAMATE-RECEPTOR-SIGNALING_P...  | GO-0035235    | 9    | 0.556691 | 1.48562  | 0.084359  | 0.819220  | 1.000      |  |
| 20                 | GOBP-PROTEIN-LOCALIZATION-TO-CELL-JUNCTION         | GO-1902414    | 6    | 0.646341 | 1.468410 | 0.068783  | 0.872393  | 1.000      |  |
| 21                 | GOBP-INORGANIC-ION-TRANSMEMBRANE-TRANSPORT         | GO-0098660    | 9    | 0.550990 | 1.465765 | 0.069324  | 0.844717  | 1.000      |  |
| 22                 | REACTOME-ONCOGENIC-MAPK-SIGNALING                  | R-HSA-6802957 | 5    | 0.667239 | 1.454165 | 0.071813  | 0.862716  | 1.000      |  |
| 23                 | GOBP-REGULATION-OF-CELLULAR-COMPONENT-SIZE         | GO-0032535    | 7    | 0.596441 | 1.441923 | 0.100000  | 0.883021  | 1.000      |  |
| 24                 | GOBP-REGULATION-OF-NMDA-RECEPTOR-ACTIVITY          | GO-2000310    | 10   | 0.521728 | 1.434390 | 0.086799  | 0.882025  | 1.000      |  |
| 25                 | GOBP-PROTEIN-CONTAINING-COMPLEX-SUBUNIT-ORGANI...  | GO-0043933    | 14   | 0.459858 | 1.409104 | 0.108202  | 0.971007  | 1.000      |  |
| 26                 | GOBP-LEARNING                                      | GO-0007612    | 13   | 0.470597 | 1.401058 | 0.104167  | 0.972712  | 1.000      |  |
| 27                 | REACTOME-NEUREXINS-AND-NEUROLIGINS                 | R-RNO-6794361 | 9    | 0.532515 | 1.388430 | 0.125912  | 0.999461  | 1.000      |  |
| 28                 | GOBP-PROTEIN-COMPLEX-OLIGOMERIZATION               | GO-0051259    | 6    | 0.590112 | 1.384438 | 0.110912  | 0.984565  | 1.000      |  |
| 29                 | GOBP-PROTEIN-LOCALIZATION-TO-CELL-PERIPHERY        | GO-1990778    | 12   | 0.481015 | 1.382953 | 0.106618  | 0.958746  | 1.000      |  |
| 30                 | GOBP-PROTEIN-LOCALIZATION-TO-POSTSYNAPSE           | GO-0062237    | 5    | 0.638554 | 1.380786 | 0.121528  | 0.937810  | 1.000      |  |
| 31                 | GOBP-PROTEIN-LOCALIZATION-TO-MEMBRANE              | GO-0072657    | 14   | 0.451927 | 1.372858 | 0.116402  | 0.943251  | 1.000      |  |
| 32                 | GOBP-PROTEIN-LOCALIZATION-TO-SYNAPSE               | GO-0035418    | 5    | 0.638554 | 1.368986 | 0.121324  | 0.931889  | 1.000      |  |
| 33                 | GOBP-CELLULAR-COMPONENT-MAINTENANCE                | GO-0043954    | 5    | 0.626506 | 1.367283 | 0.128521  | 0.911429  | 1.000      |  |
| 34                 | GOBP-REGULATION-OF-POSTSYNAPTIC-MEMBRANE-POTEN...  | GO-0060078    | 14   | 0.446026 | 1.359635 | 0.093379  | 0.918392  | 1.000      |  |
| 35                 | GOBP-REGULATION-OF-NEUROTRANSMITTER-RECEPTOR_A...  | GO-0099601    | 13   | 0.453801 | 1.358894 | 0.108153  | 0.896114  | 1.000      |  |
| 36                 | GOBP-MONOAMINE-TRANSPORT                           | GO-0015844    | 5    | 0.615020 | 1.337279 | 0.155867  | 0.963628  | 1.000      |  |
| 37                 | GOBP-ASSOCIATIVE-LEARNING                          | GO-0008306    | 7    | 0.559081 | 1.327215 | 0.165517  | 0.982683  | 1.000      |  |
| 38                 | GOBP-CATION-TRANSPORT                              | GO-0006812    | 25   | 0.379935 | 1.326090 | 0.138514  | 0.962526  | 1.000      |  |
| 39                 | REACTOME-CREB1-PHOSPHORYLATION-THROUGH-NMDA_RE...  | R-RNO-442742  | 8    | 0.520260 | 1.325481 | 0.149281  | 0.941185  | 1.000      |  |
| 40                 | GOBP-NEURON-PROJECTION-ORGANIZATION                | GO-0106027    | 8    | 0.512422 | 1.322168 | 0.141869  | 0.932008  | 1.000      |  |

Continuation of Table S11

| NAME | ID                                                | SIZE | ES       | NES      | NOM.p.val | FDR.q.val | FWER.p.val |
|------|---------------------------------------------------|------|----------|----------|-----------|-----------|------------|
| 41   | GOBP-GENERATION-OF-PRECURSOR-METABOLITES-AND-E... | 5    | 0.608986 | 1.311754 | 0.157143  | 0.953841  | 1.000      |
| 42   | GOBP-HOMEOSTASIS-OF-NUMBER-OF-CELLS               | 5    | 0.594912 | 1.307946 | 0.160940  | 0.947470  | 1.000      |
| 43   | GOBP-INNATE-IMMUNE-RESPONSE                       | 7    | 0.526377 | 1.283827 | 0.186125  | 1.000000  | 1.000      |
| 44   | GOBP-GLUTAMATE-RECEPTOR-SIGNALING-PATHWAY         | 17   | 0.399607 | 1.266181 | 0.174576  | 1.000000  | 1.000      |
| 45   | REACTOME-CELLULAR-RESPONSES-TO-EXTERNAL-STIMULI   | 12   | 0.438862 | 1.252634 | 0.203327  | 1.000000  | 1.000      |
| 46   | GOBP-RESPONSE-TO-NUTRIENT                         | 5    | 0.567904 | 1.247074 | 0.221223  | 1.000000  | 1.000      |
| 47   | HALLMARK-P3K-AKT-MTOR-SIGNALING                   | 6    | 0.522204 | 1.227863 | 0.203936  | 1.000000  | 1.000      |
| 48   | GOBP-RESPONSE-TO-ABIOTIC-STIMULUS                 | 27   | 0.336080 | 1.224115 | 0.190557  | 1.000000  | 1.000      |
| 49   | GOBP-REGULATION-OF-ANATOMICAL-STRUCTURE-SIZE      | 10   | 0.437734 | 1.207463 | 0.219684  | 1.000000  | 1.000      |
| 50   | GOBP-REGULATION-OF-WNT-SIGNALING-PATHWAY          | 5    | 0.548305 | 1.203603 | 0.254000  | 1.000000  | 1.000      |
| 51   | GOBP-MALE-GAMETE-GENERATION                       | 5    | 0.548145 | 1.197118 | 0.248201  | 1.000000  | 1.000      |
| 52   | GOBP-REGULATION-OF-POSTSYNAPSE-ORGANIZATION       | 6    | 0.504298 | 1.181934 | 0.273205  | 1.000000  | 1.000      |
| 53   | GOBP-REGULATION-OF-MEMBRANE-POTENTIAL             | 17   | 0.363453 | 1.172667 | 0.249158  | 1.000000  | 1.000      |
| 54   | GOBP-REGULATION-OF-METAL-ION-TRANSPORT            | 6    | 0.511707 | 1.169342 | 0.274194  | 1.000000  | 1.000      |
| 55   | GOBP-MEMBRANE-ORGANIZATION                        | 12   | 0.410460 | 1.167651 | 0.282098  | 1.000000  | 1.000      |
| 56   | GOBP-NEUROTRANSMITTER-SECRETION                   | 6    | 0.502626 | 1.154663 | 0.288396  | 1.000000  | 1.000      |
| 57   | GOBP-CATION-TRANSMEMBRANE-TRANSPORT               | 18   | 0.354188 | 1.153508 | 0.273684  | 1.000000  | 1.000      |
| 58   | GOBP-G-PROTEIN-COUPLED-RECEPTOR-SIGNALING-PATHWAY | 18   | 0.346863 | 1.151636 | 0.263934  | 1.000000  | 1.000      |
| 59   | REACTOME-POST-TRANSLATIONAL-PROTEIN-MODIFICATION  | 7    | 0.471931 | 1.147994 | 0.294872  | 1.000000  | 1.000      |
| 60   | GOBP-DENDRITIC-SPINE-DEVELOPMENT                  | 6    | 0.511171 | 1.146298 | 0.329609  | 1.000000  | 1.000      |
| 61   | REACTOME-INTERFERON-SIGNALING                     | 6    | 0.497862 | 1.141704 | 0.291367  | 1.000000  | 1.000      |
| 62   | GOBP-DEVELOPMENTAL-MATURATION                     | 5    | 0.530720 | 1.131630 | 0.344178  | 1.000000  | 1.000      |
| 63   | GOBP-REGULATION-OF-TRANSPORTER-ACTIVITY           | 17   | 0.354141 | 1.131436 | 0.314721  | 1.000000  | 1.000      |
| 64   | GOBP-ORGANIC-HYDROXY-COMPOUND-TRANSPORT           | 6    | 0.495429 | 1.128347 | 0.326376  | 1.000000  | 1.000      |
| 65   | GOBP-CHEMICAL-SYNAPTIC-TRANSMISSION-POSTSYNAPTIC  | 9    | 0.430212 | 1.120542 | 0.306644  | 1.000000  | 1.000      |
| 66   | REACTOME-MEMBRANE-TRAFFICKING                     | 5    | 0.516645 | 1.121580 | 0.341284  | 1.000000  | 1.000      |
| 67   | GOBP-REGULATION-OF-CYTOSOLIC-CALCIUM-ION-CONCE... | 13   | 0.376914 | 1.118450 | 0.313406  | 1.000000  | 1.000      |
| 68   | GOBP-REGULATION-OF-ION-TRANSPORT                  | 36   | 0.296374 | 1.116070 | 0.332149  | 1.000000  | 1.000      |
| 69   | GOBP-DIVALENT-INORGANIC-CATION-HOMEOSTASIS        | 13   | 0.376914 | 1.108401 | 0.326050  | 1.000000  | 1.000      |
| 70   | GOBP-HEAD-DEVELOPMENT                             | 22   | 0.322022 | 1.107567 | 0.312187  | 1.000000  | 1.000      |
| 71   | GOBP-CALCIUM-ION-TRANSPORT-INTO-CYTOSOL           | 7    | 0.447161 | 1.107132 | 0.336237  | 1.000000  | 1.000      |
| 72   | GOBP-METAL-ION-TRANSPORT                          | 11   | 0.380502 | 1.096673 | 0.332740  | 1.000000  | 1.000      |
| 73   | GOBP-REGULATION-OF-SIGNALING-RECEPTOR-ACTIVITY    | 14   | 0.365134 | 1.091687 | 0.351304  | 1.000000  | 1.000      |
| 74   | REACTOME-TRANSCRIPTIONAL-REGULATION-BY-MECP2      | 7    | 0.449566 | 1.089911 | 0.353680  | 1.000000  | 1.000      |
| 75   | REACTOME-INFECTIOUS-DISEASE                       | 13   | 0.365399 | 1.088924 | 0.353041  | 1.000000  | 1.000      |
| 76   | GOBP-CYTOSOLIC-CALCIUM-ION-TRANSPORT              | 7    | 0.447161 | 1.087455 | 0.388785  | 1.000000  | 1.000      |
| 77   | REACTOME-VESICLE-MEDIATED-TRANSPORT               | 5    | 0.516645 | 1.085773 | 0.372881  | 1.000000  | 1.000      |
| 78   | GOBP-PROTEIN-LOCALIZATION-TO-PLASMA-MEMBRANE      | 7    | 0.440613 | 1.084246 | 0.355240  | 1.000000  | 1.000      |
| 79   | REACTOME-TRAFFICKING-OF-AMPA-RECEPTORS            | 11   | 0.385754 | 1.084218 | 0.339789  | 1.000000  | 1.000      |
| 80   | GOBP-RESPONSE-TO-DRUG                             | 11   | 0.379930 | 1.082146 | 0.361552  | 1.000000  | 1.000      |
| 81   | GOBP-PEPTIDE-BIOSYNTHETIC-PROCESS                 | 7    | 0.440217 | 1.082037 | 0.350442  | 1.000000  | 1.000      |
| 82   | GOBP-RESPIRATORY-SYSTEM-DEVELOPMENT               | 6    | 0.460410 | 1.072992 | 0.379747  | 1.000000  | 1.000      |
| 83   | GOBP-DEVELOPMENTAL-CELL-GROWTH                    | 5    | 0.499393 | 1.072022 | 0.386809  | 1.000000  | 1.000      |

Continuation of Table S11

| NAME | ID                                                | SIZE | ES       | NES      | NOM.p.val | FDR.q.val | FWER.p.val |
|------|---------------------------------------------------|------|----------|----------|-----------|-----------|------------|
| 84   | GOBP-CALCIUM-ION-TRANSPORT                        | 11   | 0.380502 | 1.071964 | 0.364791  | 1.000000  | 1.000      |
| 85   | GOBP-SEXUAL-REPRODUCTION                          | 10   | 0.388175 | 1.070595 | 0.352740  | 1.000000  | 1.000      |
| 86   | GOBP-LONG-TERM-SYNAPTIC-DEPRESSION                | 5    | 0.496568 | 1.067658 | 0.385714  | 1.000000  | 1.000      |
| 87   | GOBP-CALCIUM-ION-TRANSMEMBRANE-TRANSPORT          | 7    | 0.447161 | 1.066191 | 0.366972  | 1.000000  | 1.000      |
| 88   | GOBP-AMIDE-BIOSYNTHETIC-PROCESS                   | 7    | 0.440217 | 1.066106 | 0.403478  | 1.000000  | 1.000      |
| 89   | REACTOME-DISEASES-OF-SIGNAL-TRANSDUCTION-BY_GR... | 12   | 0.367294 | 1.066026 | 0.381944  | 1.000000  | 1.000      |
| 90   | GOBP-NEGATIVE-REGULATION-OF-BINDING               | 6    | 0.459380 | 1.061192 | 0.381125  | 1.000000  | 1.000      |
| 91   | REACTOME-CIRCADIAN-CLOCK                          | 5    | 0.483531 | 1.058528 | 0.382784  | 1.000000  | 1.000      |
| 92   | GOBP-ANION-TRANSMEMBRANE-TRANSPORT                | 7    | 0.424702 | 1.053892 | 0.381282  | 1.000000  | 1.000      |
| 93   | GOBP-REGULATION-OF_CELL-PROJECTION-ORGANIZATION   | 20   | 0.320443 | 1.052005 | 0.384880  | 1.000000  | 1.000      |
| 94   | GOBP-CELL-CELL-SIGNALING-BY-WNT                   | 7    | 0.432237 | 1.050591 | 0.418944  | 1.000000  | 1.000      |
| 95   | GOBP-REGULATION-OF_CATION-TRANSMEMBRANE-TRANSPORT | 16   | 0.334915 | 1.044905 | 0.409241  | 1.000000  | 1.000      |
| 96   | GOBP-NEGATIVE-REGULATION-OF_SYNAPTIC-TRANSMISSION | 6    | 0.442020 | 1.039826 | 0.433526  | 1.000000  | 1.000      |
| 97   | GOBP-POSITIVE-REGULATION-OF_CELL-PROJECTION_OR... | 10   | 0.381644 | 1.033391 | 0.425225  | 1.000000  | 1.000      |
| 98   | GOBP-REGULATION-OF-NEUROTRANSMITTER-LEVELS        | 7    | 0.422952 | 1.031098 | 0.415301  | 1.000000  | 1.000      |
| 99   | GOBP-REGULATION-OF_TRANSPORT                      | 44   | 0.267789 | 1.028635 | 0.411664  | 1.000000  | 1.000      |
| 100  | GOBP-METAL-ION-HOMEOSTASIS                        | 14   | 0.344780 | 1.027953 | 0.427877  | 1.000000  | 1.000      |
| 101  | GOBP-REGULATION-OF_CELL-SIZE                      | 5    | 0.481054 | 1.027845 | 0.433824  | 1.000000  | 1.000      |
| 102  | GOBP-NEURON-DEVELOPMENT                           | 33   | 0.280429 | 1.026671 | 0.427336  | 1.000000  | 1.000      |
| 103  | GOBP-NEUROTRANSMITTER-TRANSPORT                   | 7    | 0.422952 | 1.022985 | 0.428829  | 1.000000  | 1.000      |
| 104  | GOBP-REGULATION-OF-NEUROTRANSMITTER-TRANSPORT     | 6    | 0.441118 | 1.019756 | 0.440741  | 1.000000  | 1.000      |
| 105  | GOBP-SENSORY-PERCEPTION                           | 9    | 0.380311 | 1.017152 | 0.441331  | 1.000000  | 1.000      |
| 106  | GOBP-NEUROGENESIS                                 | 40   | 0.267049 | 1.012745 | 0.444631  | 1.000000  | 1.000      |
| 107  | GOBP-RESPONSE-TO-OXYGEN-LEVELS                    | 8    | 0.398507 | 1.004018 | 0.432916  | 1.000000  | 1.000      |
| 108  | GOBP-CENTRAL-NERVOUS-SYSTEM-DEVELOPMENT           | 26   | 0.279412 | 0.991034 | 0.466667  | 1.000000  | 1.000      |
| 109  | GOBP-TRANSMEMBRANE-TRANSPORT                      | 27   | 0.276427 | 0.984567 | 0.480607  | 1.000000  | 1.000      |
| 110  | GOBP-REGULATION-OF-PROTEIN-BINDING                | 7    | 0.400157 | 0.979250 | 0.487455  | 1.000000  | 1.000      |
| 111  | REACTOME-L1CAM-INTERACTIONS                       | 5    | 0.446396 | 0.977406 | 0.475564  | 1.000000  | 1.000      |
| 112  | GOBP-IMPORT-INTO-CELL                             | 6    | 0.421627 | 0.973758 | 0.497345  | 1.000000  | 1.000      |
| 113  | GOBP-DEFENSE-RESPONSE-TO-OTHER-ORGANISM           | 9    | 0.352219 | 0.972414 | 0.470270  | 1.000000  | 1.000      |
| 114  | GOBP-RESPONSE-TO-MECHANICAL-STIMULUS              | 6    | 0.412262 | 0.968258 | 0.494624  | 1.000000  | 1.000      |
| 115  | GOBP-CELLULAR-RESPONSE-TO-HORMONE-STIMULUS        | 11   | 0.342638 | 0.965464 | 0.510714  | 1.000000  | 1.000      |
| 116  | GOBP-EPHRIN-RECEPTOR-SIGNALING-PATHWAY            | 5    | 0.440017 | 0.958411 | 0.491773  | 1.000000  | 1.000      |
| 117  | GOBP-ADENYLATE-CYCLASE-INHIBITING-G-PROTEIN_CO... | 9    | 0.353721 | 0.957431 | 0.488496  | 1.000000  | 1.000      |
| 118  | GOBP-NEURON-DIFFERENTIATION                       | 36   | 0.256198 | 0.953390 | 0.553366  | 1.000000  | 1.000      |
| 119  | GOBP-NEGATIVE-REGULATION-OF-MOLECULAR-FUNCTION    | 24   | 0.281609 | 0.950693 | 0.527919  | 1.000000  | 1.000      |
| 120  | GOBP-CELLULAR-RESPONSE-TO-PEPTIDE-HORMONE-STIM... | 9    | 0.351531 | 0.950209 | 0.521515  | 1.000000  | 1.000      |
| 121  | GOBP-MORPHOGENESIS-OF-AN-EPITHELIUM               | 6    | 0.407845 | 0.949197 | 0.501742  | 1.000000  | 1.000      |
| 122  | GOBP-ORGANONITROGEN-COMPOUND-BIOSYNTHETIC-PROCESS | 13   | 0.312304 | 0.944903 | 0.540587  | 1.000000  | 1.000      |
| 123  | GOBP-VESICLE-MEDIATED-TRANSPORT-IN-SYNAPSE        | 7    | 0.387115 | 0.934607 | 0.530797  | 1.000000  | 1.000      |
| 124  | REACTOME-SIGNALING-BY-GPCR                        | 22   | 0.269010 | 0.919776 | 0.548231  | 1.000000  | 1.000      |
| 125  | GOBP-REGULATION-OF-PROTEIN-LOCALIZATION-TO_CEL... | 6    | 0.397394 | 0.916372 | 0.553571  | 1.000000  | 1.000      |
| 126  | GOBP-POSITIVE-REGULATION-OF_CELL-DEATH            | 19   | 0.275996 | 0.911815 | 0.585366  | 1.000000  | 1.000      |

Continuation of Table S11

| NAME                                                   | ID            | SIZE | ES       | NES      | NOM.p.val | FDR.q.val | FWER.p.val |
|--------------------------------------------------------|---------------|------|----------|----------|-----------|-----------|------------|
| 127 GOBP-REGULATION-OF-CATION-CHANNEL-ACTIVITY         | GO-2001257    | 14   | 0.306712 | 0.910644 | 0.568873  | 1.000000  | 1.000      |
| 128 GOBP-MULTICELLULAR-ORGANISMAL-HOMEOSTASIS          | GO-0048871    | 12   | 0.317023 | 0.910180 | 0.575916  | 1.000000  | 1.000      |
| 129 GOBP-PEPTIDE-METABOLIC-PROCESS                     | GO-0006518    | 12   | 0.310859 | 0.903648 | 0.583190  | 1.000000  | 1.000      |
| 130 GOBP-TISSUE-HOMEOSTASIS                            | GO-0001894    | 5    | 0.423233 | 0.902167 | 0.578947  | 1.000000  | 1.000      |
| 131 GOBP-CELLULAR-ION-HOMEOSTASIS                      | GO-0006873    | 14   | 0.293939 | 0.901647 | 0.595745  | 1.000000  | 1.000      |
| 132 GOBP-RESPONSE-TO-MONOSACCHARIDE                    | GO-0034284    | 5    | 0.412327 | 0.900519 | 0.604736  | 1.000000  | 1.000      |
| 133 GOBP-CELL-PROJECTION-ORGANIZATION                  | GO-0030030    | 34   | 0.240126 | 0.893037 | 0.636852  | 1.000000  | 1.000      |
| 134 REACTOME-EPH-EPHRIN-SIGNALING                      | R-RNO-2682334 | 6    | 0.383213 | 0.886275 | 0.597450  | 1.000000  | 1.000      |
| 135 GOBP-RESPONSE-TO-CARBOHYDRATE                      | GO-0009743    | 5    | 0.412327 | 0.884967 | 0.610811  | 1.000000  | 1.000      |
| 136 GOBP-GAMETE-GENERATION                             | GO-0007276    | 9    | 0.332485 | 0.883397 | 0.607509  | 1.000000  | 1.000      |
| 137 GOBP-ENDOCRINE-SYSTEM-DEVELOPMENT                  | GO-0035270    | 6    | 0.384554 | 0.882929 | 0.629964  | 1.000000  | 1.000      |
| 138 GOBP-CELLULAR-AMIDE-METABOLIC-PROCESS              | GO-0043603    | 13   | 0.295258 | 0.878717 | 0.612628  | 1.000000  | 1.000      |
| 139 GOBP-CARBOHYDRATE-METABOLIC-PROCESS                | GO-0005975    | 9    | 0.334131 | 0.877108 | 0.614498  | 1.000000  | 1.000      |
| 140 GOBP-CELLULAR-RESPONSE-TO-ALCOHOL                  | GO-00097306   | 5    | 0.414001 | 0.875581 | 0.624329  | 1.000000  | 1.000      |
| 141 GOBP-LOCOMOTORY-BEHAVIOR                           | GO-0007626    | 7    | 0.360912 | 0.868117 | 0.625688  | 1.000000  | 1.000      |
| 142 GOBP-REGULATION-OF-ANION-TRANSMEMBRANE-TRANSPORT   | GO-1903959    | 5    | 0.402034 | 0.862474 | 0.642322  | 1.000000  | 1.000      |
| 143 GOBP-TELENCEPHALON-DEVELOPMENT                     | GO-0021537    | 6    | 0.369488 | 0.856174 | 0.629565  | 1.000000  | 1.000      |
| 144 GOBP-POSITIVE-REGULATION-OF-PEPTIDASE-ACTIVITY     | GO-0010952    | 7    | 0.344226 | 0.845646 | 0.646739  | 1.000000  | 1.000      |
| 145 GOBP-MONONUCLEAR-CELL-DIFFERENTIATION              | GO-1903131    | 7    | 0.347866 | 0.844114 | 0.625862  | 1.000000  | 1.000      |
| 146 GOBP-TISSUE-MORPHOGENESIS                          | GO-0048729    | 7    | 0.344560 | 0.842446 | 0.642606  | 1.000000  | 1.000      |
| 147 GOBP-RESPONSE-TO-PEPTIDE-HORMONE                   | GO-0043434    | 13   | 0.280000 | 0.842190 | 0.662752  | 1.000000  | 1.000      |
| 148 GOBP-PROTEIN-MODIFICATION-BY-SMALL-PROTEIN-CON...  | GO-0070647    | 7    | 0.345390 | 0.840351 | 0.661080  | 1.000000  | 1.000      |
| 149 GOBP-REGULATION-OF-LONG-TERM-SYNAPTIC-POTENTIAL... | GO-1900271    | 6    | 0.365854 | 0.838525 | 0.646956  | 1.000000  | 1.000      |
| 150 GOBP-CELL-GROWTH                                   | GO-0016049    | 10   | 0.300048 | 0.837426 | 0.689119  | 1.000000  | 1.000      |
| 151 GOBP-POSITIVE-REGULATION-OF-CYSTEINE-TYPE-ENDO...  | GO-2001056    | 7    | 0.344226 | 0.835953 | 0.686238  | 1.000000  | 1.000      |
| 152 REACTOME-DEVELOPMENTAL-BIOLOGY                     | R-RNO-1266738 | 23   | 0.245577 | 0.833641 | 0.701493  | 1.000000  | 1.000      |
| 153 REACTOME-ANTI-INFLAMMATORY-RESPONSE-FAVOURING...   | R-HSA-9662851 | 5    | 0.385542 | 0.826516 | 0.678571  | 1.000000  | 1.000      |
| 154 GOBP-HOMEOSTATIC-PROCESS                           | GO-0042592    | 31   | 0.228752 | 0.825424 | 0.720588  | 1.000000  | 1.000      |
| 155 REACTOME-TRANSCRIPTIONAL-REGULATION-OF-WHITE-A...  | R-RNO-381340  | 6    | 0.357542 | 0.822755 | 0.687713  | 1.000000  | 1.000      |
| 156 GOBP-REGULATION-OF-TRANSMEMBRANE-TRANSPORT         | GO-0034762    | 23   | 0.238610 | 0.820490 | 0.722615  | 1.000000  | 1.000      |
| 157 GOBP-POLYSACCHARIDE-METABOLIC-PROCESS              | GO-0005976    | 5    | 0.378159 | 0.813496 | 0.680702  | 1.000000  | 1.000      |
| 158 GOBP-POSITIVE-REGULATION-OF-PROTEOLYSIS            | GO-0045862    | 8    | 0.315445 | 0.807562 | 0.705776  | 1.000000  | 1.000      |
| 159 GOBP-REGULATION-OF-HORMONE-LEVELS                  | GO-0010817    | 12   | 0.276045 | 0.805861 | 0.719595  | 1.000000  | 1.000      |
| 160 GOBP-CELLULAR-MACROMOLECULE-LOCALIZATION           | GO-0070727    | 21   | 0.241402 | 0.805852 | 0.718519  | 1.000000  | 1.000      |
| 161 GOBP-CELLULAR-RESPONSE-TO-KETONE                   | GO-1901655    | 5    | 0.373494 | 0.800468 | 0.697133  | 1.000000  | 1.000      |
| 162 GOBP-DENDRITIC-SPINE-MORPHOGENESIS                 | GO-0060997    | 5    | 0.374724 | 0.800062 | 0.703704  | 1.000000  | 1.000      |
| 163 GOBP-MONOCARBOXYLIC-ACID-METABOLIC-PROCESS         | GO-0032787    | 6    | 0.347766 | 0.796355 | 0.725314  | 1.000000  | 1.000      |
| 164 GOBP-PROTEOLYSIS                                   | GO-0006508    | 17   | 0.249834 | 0.795647 | 0.730570  | 1.000000  | 1.000      |
| 165 REACTOME-NGF-STIMULATED-TRANSCRIPTION              | R-RNO-9031628 | 9    | 0.303798 | 0.795264 | 0.717813  | 1.000000  | 1.000      |
| 166 GOBP-POSITIVE-REGULATION-OF-SECRETION              | GO-0051047    | 6    | 0.342337 | 0.792974 | 0.719643  | 1.000000  | 1.000      |
| 167 GOBP-CELL-JUNCTION-ORGANIZATION                    | GO-0034330    | 19   | 0.237372 | 0.786197 | 0.767327  | 1.000000  | 1.000      |
| 168 GOBP-REGULATION-OF-TRANS-SYNAPTIC-SIGNALING        | GO-0099177    | 40   | 0.205484 | 0.784573 | 0.801639  | 1.000000  | 1.000      |
| 169 GOBP-CELL-CELL-JUNCTION-ASSEMBLY                   | GO-0007043    | 5    | 0.365342 | 0.784135 | 0.723133  | 1.000000  | 1.000      |



Continuation of Table S11

| NAME                                                  | ID            | SIZE | ES       | NES      | NOM.p.val | FDR.q.val | FWER.p.val |
|-------------------------------------------------------|---------------|------|----------|----------|-----------|-----------|------------|
| 170 GOBP-CALCIUM-MEDIATED-SIGNALING                   | GO-0019722    | 10   | 0.279283 | 0.779990 | 0.737881  | 1.000000  | 1.000      |
| 171 GOBP-POSITIVE-REGULATION-OF-LONG-TERM-SYNAPTIC... | GO-1900273    | 5    | 0.361446 | 0.777931 | 0.726433  | 1.000000  | 1.000      |
| 172 GOBP-LIPID-EXPORT-FROM-CELL                       | GO-0140353    | 5    | 0.356493 | 0.772829 | 0.710383  | 1.000000  | 1.000      |
| 173 GOBP-SYNAPSE-ORGANIZATION                         | GO-0050808    | 17   | 0.239357 | 0.766052 | 0.786078  | 1.000000  | 1.000      |
| 174 GOBP-NEGATIVE-REGULATION-OF-KINASE-ACTIVITY       | GO-0033673    | 5    | 0.345566 | 0.764877 | 0.732394  | 1.000000  | 1.000      |
| 175 GOBP-ACTIVATION-OF-IMMUNE-RESPONSE                | GO-0002253    | 5    | 0.348574 | 0.759090 | 0.750439  | 1.000000  | 1.000      |
| 176 GOBP-IMMUNE-EFFECTOR-PROCESS                      | GO-0002252    | 10   | 0.274678 | 0.758344 | 0.756554  | 1.000000  | 1.000      |
| 177 GOBP-NEGATIVE-REGULATION-OF-TRANSFERASE-ACTIVITY  | GO-0051348    | 5    | 0.345566 | 0.757384 | 0.769088  | 1.000000  | 1.000      |
| 178 GOBP-EPITHELIAL-DEVELOPMENT                       | GO-0060429    | 15   | 0.245003 | 0.757081 | 0.799325  | 1.000000  | 1.000      |
| 179 GOBP-CIRCADIEN-REGULATION-OF-GENE-EXPRESSION      | GO-0032922    | 5    | 0.345256 | 0.754532 | 0.771325  | 1.000000  | 1.000      |
| 180 GOBP-ION-HOMEOSTASIS                              | GO-0050801    | 16   | 0.236438 | 0.749590 | 0.816949  | 1.000000  | 1.000      |
| 181 REACTOME-DAG-AND-IP3-SIGNALING                    | R-RNO-1489509 | 8    | 0.297147 | 0.749121 | 0.772487  | 1.000000  | 1.000      |
| 182 GOBP-CHROMATIN-ORGANIZATION                       | GO-0006325    | 5    | 0.351723 | 0.748818 | 0.794118  | 1.000000  | 1.000      |
| 183 GOBP-ORGANIC-ANION-TRANSPORT                      | GO-0015711    | 6    | 0.316344 | 0.732696 | 0.774194  | 1.000000  | 1.000      |
| 184 GOBP-EXTRINSIC-APOPTOTIC-SIGNALING-PATHWAY        | GO-0097191    | 7    | 0.300851 | 0.731105 | 0.789931  | 1.000000  | 1.000      |
| 185 GOBP-ORGANIC-ACID-TRANSPORT                       | GO-0015849    | 7    | 0.297027 | 0.729627 | 0.798932  | 1.000000  | 1.000      |
| 186 GOBP-CARBOXYLIC-ACID-TRANSPORT                    | GO-0046942    | 6    | 0.316344 | 0.729463 | 0.819421  | 1.000000  | 1.000      |
| 187 GOBP-REGULATION-OF-NEURON-PROJECTION-DEVELOPMENT  | GO-0010975    | 16   | 0.232202 | 0.729073 | 0.805604  | 1.000000  | 1.000      |
| 188 GOBP-DEFENSE-RESPONSE                             | GO-0006952    | 19   | 0.223639 | 0.727821 | 0.818182  | 1.000000  | 1.000      |
| 189 REACTOME-LEISHMANIA-INFECTION                     | R-HSA-9658195 | 10   | 0.257005 | 0.721314 | 0.812174  | 1.000000  | 1.000      |
| 190 GOBP-REGULATION-OF-RECEPTOR-MEDIATED-ENDOCYTOSIS  | GO-0048259    | 5    | 0.327154 | 0.720272 | 0.807760  | 1.000000  | 1.000      |
| 191 GOBP-AMINO-ACID-TRANSPORT                         | GO-0006865    | 6    | 0.316344 | 0.719928 | 0.797891  | 1.000000  | 1.000      |
| 192 GOBP-REGULATION-OF-BINDING                        | GO-0051098    | 11   | 0.261227 | 0.717951 | 0.826087  | 1.000000  | 1.000      |
| 193 GOBP-REGULATION-OF-NERVOUS-SYSTEM-PROCESS         | GO-0031644    | 8    | 0.277634 | 0.717705 | 0.802768  | 1.000000  | 1.000      |
| 194 GOBP-REGULATION-OF-MUSCLE-CELL-DIFFERENTIATION    | GO-0051147    | 6    | 0.308707 | 0.717231 | 0.828671  | 1.000000  | 1.000      |
| 195 GOBP-AXON-DEVELOPMENT                             | GO-0061564    | 18   | 0.222157 | 0.715808 | 0.813067  | 1.000000  | 1.000      |
| 196 GOBP-REGULATION-OF-PROTEIN-TYROSINE-KINASE-ACT... | GO-0061097    | 5    | 0.331277 | 0.712493 | 0.815838  | 1.000000  | 1.000      |
| 197 GOBP-CELLULAR-HOMEOSTASIS                         | GO-0019725    | 18   | 0.212137 | 0.707958 | 0.855670  | 1.000000  | 1.000      |
| 198 GOBP-CELLULAR-CARBOHYDRATE-METABOLIC-PROCESS      | GO-0044262    | 5    | 0.331203 | 0.705829 | 0.818182  | 1.000000  | 1.000      |
| 199 GOBP-POSITIVE-REGULATION-OF-PROTEIN-TYROSINE-K... | GO-0061098    | 5    | 0.331277 | 0.705551 | 0.825137  | 1.000000  | 1.000      |
| 200 GOBP-CELL-CELL-SIGNALING                          | GO-0007267    | 56   | 0.178555 | 0.705300 | 0.881034  | 1.000000  | 1.000      |
| 201 GOBP-POSITIVE-REGULATION-OF-DNA-BINDING-TRANSC... | GO-0051091    | 10   | 0.257131 | 0.699441 | 0.843310  | 1.000000  | 1.000      |
| 202 GOBP-RESPONSE-TO-LIGHT-STIMULUS                   | GO-0009416    | 11   | 0.246059 | 0.698442 | 0.842105  | 1.000000  | 1.000      |
| 203 GOBP-CELL-MORPHOGENESIS-INVOLVED-IN-NEURON-DIF... | GO-0048667    | 21   | 0.204781 | 0.688575 | 0.880471  | 1.000000  | 1.000      |
| 204 GOBP-CELL-MORPHOGENESIS-INVOLVED-IN-DIFFERENTI... | GO-0009094    | 21   | 0.204781 | 0.688382 | 0.899174  | 1.000000  | 1.000      |
| 205 GOBP-POSITIVE-REGULATION-OF-HYDROLASE-ACTIVITY    | GO-0051345    | 16   | 0.218988 | 0.688054 | 0.893103  | 1.000000  | 1.000      |
| 206 GOBP-CELL-CELL-JUNCTION-ORGANIZATION              | GO-0045216    | 6    | 0.300433 | 0.683021 | 0.849732  | 1.000000  | 1.000      |
| 207 GOBP-NEUROUS-SYSTEM-PROCESS                       | GO-0050877    | 38   | 0.177821 | 0.679960 | 0.915398  | 1.000000  | 1.000      |
| 208 GOBP-ORGANIC-ACID-METABOLIC-PROCESS               | GO-0006082    | 7    | 0.271215 | 0.664879 | 0.862917  | 1.000000  | 1.000      |
| 209 GOBP-CHEMICAL-HOMEOSTASIS                         | GO-0048878    | 23   | 0.192896 | 0.659706 | 0.917763  | 1.000000  | 1.000      |
| 210 REACTOME-DEATH-RECEPTOR-SIGNALING                 | R-RNO-73887   | 5    | 0.302565 | 0.655314 | 0.878049  | 1.000000  | 1.000      |
| 211 GOBP-POSITIVE-REGULATION-OF-CELL-GROWTH           | GO-0030307    | 6    | 0.286138 | 0.654587 | 0.881119  | 1.000000  | 1.000      |
| 212 GOBP-REGULATION-OF-CARBOHYDRATE-METABOLIC-PROCESS | GO-0006109    | 5    | 0.303491 | 0.653217 | 0.888889  | 1.000000  | 1.000      |

Continuation of Table S11

| NAME | ID                                                | SIZE | ES       | NES      | NOM.p.val | FDR.q.val | FWER.p.val |
|------|---------------------------------------------------|------|----------|----------|-----------|-----------|------------|
| 213  | GOBP-RECEPTOR-INTERNALIZATION                     | 5    | 0.298956 | 0.652523 | 0.902256  | 1.000000  | 1.000      |
| 214  | GOBP-REGULATION-OF-CARBOHYDRATE-BIOSYNTHETIC.P... | 5    | 0.303491 | 0.651037 | 0.876977  | 1.000000  | 1.000      |
| 215  | GOBP-CARBOHYDRATE-BIOSYNTHETIC-PROCESS            | 5    | 0.303491 | 0.649120 | 0.893382  | 1.000000  | 1.000      |
| 216  | GOBP-ORGANIC-HYDROXY-COMPOUND-METABOLIC-PROCESS   | 7    | 0.260367 | 0.640437 | 0.904425  | 1.000000  | 1.000      |
| 217  | GOBP-RESPONSE-TO-ORGANIC-CYCLOC-COMPOUND          | 20   | 0.188783 | 0.640182 | 0.934319  | 1.000000  | 1.000      |
| 218  | GOBP-RECEPTOR-METABOLIC-PROCESS                   | 5    | 0.298956 | 0.639929 | 0.908425  | 1.000000  | 1.000      |
| 219  | GOBP-PURINE-CONTAINING-COMPOUND-METABOLIC-PROCESS | 5    | 0.296816 | 0.636404 | 0.903108  | 1.000000  | 1.000      |
| 220  | GOBP-REGULATION-OF-AXONOGENESIS                   | 7    | 0.262879 | 0.631115 | 0.916667  | 1.000000  | 1.000      |
| 221  | GOBP-RESPONSE-TO-HORMONE                          | 20   | 0.187325 | 0.625584 | 0.928934  | 1.000000  | 1.000      |
| 222  | HALLMARK-EPITHELIAL-MESENCHYMAL-TRANSITION        | 5    | 0.292480 | 0.625527 | 0.904315  | 1.000000  | 1.000      |
| 223  | GOBP-COGNITION                                    | 28   | 0.176986 | 0.624492 | 0.939597  | 1.000000  | 1.000      |
| 224  | GOBP-CARBOHYDRATE-DERIVATIVE-METABOLIC-PROCESS    | 7    | 0.254496 | 0.622185 | 0.933333  | 1.000000  | 1.000      |
| 225  | GOBP-ADENYLATE-CYCLASE-MODULATING-G-PROTEIN.CO... | 11   | 0.220115 | 0.619251 | 0.908475  | 1.000000  | 1.000      |
| 226  | GOBP-REGULATION-OF-PROTEIN-LOCALIZATION.TO.MEM... | 7    | 0.255202 | 0.617966 | 0.938849  | 1.000000  | 1.000      |
| 227  | GOBP-LONG-TERM-MEMORY                             | 6    | 0.268293 | 0.616842 | 0.907749  | 1.000000  | 1.000      |
| 228  | GOBP-MUSCLE-CONTRACTION                           | 5    | 0.274263 | 0.603266 | 0.932331  | 1.000000  | 1.000      |
| 229  | GOBP-POSITIVE-REGULATION-OF-IMMUNE-RESPONSE       | 9    | 0.224443 | 0.602341 | 0.941712  | 1.000000  | 1.000      |
| 230  | GOBP-G-PROTEIN-COUPLED-GLUTAMATE-RECEPTOR.SIGN... | 8    | 0.233191 | 0.593848 | 0.961739  | 1.000000  | 1.000      |
| 231  | HALLMARK-KRAS-SIGNALING-UP                        | 6    | 0.256678 | 0.590334 | 0.950368  | 1.000000  | 1.000      |
| 232  | GOBP-REGULATION-OF-CYSTEINE-TYPE-ENDOPEPTIDASE... | 9    | 0.222544 | 0.580748 | 0.942761  | 1.000000  | 1.000      |
| 233  | GOBP-CELLULAR-RESPONSE-TO-PEPTIDE                 | 13   | 0.184918 | 0.563296 | 0.955556  | 1.000000  | 1.000      |
| 234  | REACTOME-TOLL-LIKE-RECEPTOR-CASCADES              | 8    | 0.214829 | 0.561910 | 0.965950  | 1.000000  | 1.000      |
| 235  | REACTOME-TOLL-LIKE-RECEPTOR-TLR1-TLR2-CASCADE     | 8    | 0.214829 | 0.560567 | 0.959664  | 1.000000  | 1.000      |
| 236  | GOBP-REGULATION-OF-LIPID-LOCALIZATION             | 5    | 0.262895 | 0.557740 | 0.958042  | 1.000000  | 1.000      |
| 237  | GOBP-CYTOKINE-MEDIATED-SIGNALING-PATHWAY          | 16   | 0.179934 | 0.555415 | 0.956294  | 1.000000  | 1.000      |
| 238  | REACTOME-MYD88-INDEPENDENT-TLR4-CASCADE           | 8    | 0.214829 | 0.554786 | 0.957895  | 1.000000  | 1.000      |
| 239  | GOBP-REGULATION-OF-PEPTIDASE-ACTIVITY             | 10   | 0.201975 | 0.553361 | 0.954466  | 1.000000  | 1.000      |
| 240  | REACTOME-CYTOKINE-SIGNALING-IN-IMMUNE-SYSTEM      | 21   | 0.164324 | 0.549787 | 0.974705  | 1.000000  | 1.000      |
| 241  | REACTOME-GPCR-LIGAND-BINDING                      | 8    | 0.214718 | 0.549163 | 0.968921  | 1.000000  | 1.000      |
| 242  | REACTOME-TOLL-LIKE-RECEPTOR-9-TLR9-CASCADE        | 8    | 0.214829 | 0.548355 | 0.974271  | 1.000000  | 1.000      |
| 243  | HALLMARK-UV-RESPONSE-UP                           | 5    | 0.253012 | 0.546216 | 0.964413  | 1.000000  | 1.000      |
| 244  | REACTOME-RNA-POLYMERASE-II-TRANSCRIPTION          | 20   | 0.164587 | 0.545866 | 0.978477  | 1.000000  | 1.000      |
| 245  | GOBP-SYNAPTIC-SIGNALING                           | 47   | 0.143227 | 0.540769 | 0.978477  | 1.000000  | 1.000      |
| 246  | GOBP-RESPONSE-TO-RADIATION                        | 13   | 0.178188 | 0.535104 | 0.968366  | 1.000000  | 1.000      |
| 247  | REACTOME-CLASS-C-3-METABOTROPIC-GLUTAMATE-PHER... | 7    | 0.220433 | 0.534279 | 0.976991  | 1.000000  | 1.000      |
| 248  | GOBP-REGULATION-OF-SYNAPTIC-TRANSMISSION-GLUTA... | 12   | 0.182611 | 0.529528 | 0.978078  | 1.000000  | 1.000      |
| 249  | GOBP-SYNAPTIC-TRANSMISSION-GLUTAMATERGIC          | 13   | 0.173333 | 0.520766 | 0.986014  | 1.000000  | 1.000      |
| 250  | GOBP-RECEPTOR-MEDIATED-ENDOCYTOSIS                | 6    | 0.227034 | 0.519119 | 0.983842  | 1.000000  | 1.000      |
| 251  | GOBP-BEHAVIOR                                     | 32   | 0.140793 | 0.518516 | 0.986820  | 1.000000  | 1.000      |
| 252  | GOBP-MEMORY                                       | 13   | 0.167040 | 0.497877 | 0.986755  | 1.000000  | 1.000      |
| 253  | GOBP-POSITIVE-REGULATION-OF-APOPTOTIC-SIGNALIN... | 5    | 0.224829 | 0.492571 | 0.988743  | 1.000000  | 1.000      |
| 254  | GOBP-CELLULAR-RESPONSE-TO-ORGANIC-CYCLOC-COMPOUND | 13   | 0.162668 | 0.484457 | 0.986159  | 1.000000  | 1.000      |
| 255  | GOBP-NEGATIVE-REGULATION-OF-INTRACELLULAR-SIGN... | 7    | 0.194301 | 0.476022 | 0.990942  | 1.000000  | 1.000      |

Continuation of Table S11

| NAME | ID                                                | SIZE | ES        | NES       | NOM.p.val | FDR.q.val | FWER.p.val |
|------|---------------------------------------------------|------|-----------|-----------|-----------|-----------|------------|
| 256  | GOBP-BIOLOGICAL_PROCESS_INVOLVED_IN_SYMBIOTIC.... | 11   | 0.162939  | 0.465491  | 0.991119  | 0.998179  | 1.000      |
| 257  | GOBP-NEGATIVE-REGULATION-OF-CELL_CYCLE            | 5    | 0.211429  | 0.458665  | 0.996344  | 0.995238  | 1.000      |
| 258  | GOBP-NEGATIVE-REGULATION-OF-PHOSPHORYLATION       | 7    | -0.173870 | -0.437660 | 1.000000  | 0.998710  | 1.000      |
| 259  | GOBP-MAINTENANCE-OF-LOCATION                      | 7    | -0.180946 | -0.463343 | 1.000000  | 0.998949  | 1.000      |
| 260  | GOBP-MULTICELLULAR-ORGANISM-REPRODUCTION          | 12   | -0.156481 | -0.480749 | 0.995283  | 0.999093  | 1.000      |
| 261  | GOBP-REPRODUCTION                                 | 18   | -0.155263 | -0.535406 | 0.987469  | 0.988415  | 1.000      |
| 262  | GOBP-SKIN-DEVELOPMENT                             | 5    | -0.254108 | -0.581444 | 0.962306  | 0.969275  | 1.000      |
| 263  | GOBP-NEGATIVE-REGULATION-OF-LIPID_METABOLIC_PR... | 5    | -0.253012 | -0.582144 | 0.952703  | 0.971020  | 1.000      |
| 264  | REACTOME-TRAFFICKING-OF-GLUR2-CONTAINING_AMP_A... | 8    | -0.215549 | -0.585660 | 0.938636  | 0.971191  | 1.000      |
| 265  | GOBP-REGULATION-OF-CELL_CYCLE                     | 13   | -0.184345 | -0.587451 | 0.957143  | 0.972236  | 1.000      |
| 266  | GOBP-TEMPERATURE-HOMEOSTASIS                      | 5    | -0.254099 | -0.591173 | 0.942350  | 0.971958  | 1.000      |
| 267  | GOBP-RESPONSE-TO-INORGANIC-SUBSTANCE              | 13   | -0.191088 | -0.607055 | 0.939675  | 0.964928  | 1.000      |
| 268  | GOBP-REGULATION-OF-GROWTH                         | 13   | -0.191088 | -0.607055 | 0.939675  | 0.964928  | 1.000      |
| 269  | GOBP-POSITIVE-REGULATION-OF-GLIOGENESIS           | 5    | -0.269114 | -0.609859 | 0.926339  | 0.967185  | 1.000      |
| 270  | GOBP-REGULATION-OF-GLIOGENESIS                    | 6    | -0.256098 | -0.611202 | 0.921839  | 0.968196  | 1.000      |
| 271  | GOBP-LIPID-BIOSYNTHETIC-PROCESS                   | 5    | -0.269493 | -0.612292 | 0.944444  | 0.969623  | 1.000      |
| 272  | GOBP-POSITIVE-REGULATION-OF-DEFENSE-RESPONSE      | 23   | -0.166121 | -0.620586 | 0.950980  | 0.965125  | 1.000      |
| 273  | GOBP-RESPONSE-TO-CYTOKINE                         | 6    | -0.256098 | -0.623806 | 0.943182  | 0.964544  | 1.000      |
| 274  | GOBP-REGULATION-OF-LIPID-BIOSYNTHETIC-PROCESS     | 10   | -0.217944 | -0.631622 | 0.932432  | 0.959707  | 1.000      |
| 275  | GOBP-LIPID-LOCALIZATION                           | 6    | -0.256098 | -0.633327 | 0.913979  | 0.960213  | 1.000      |
| 276  | GOBP-MEMBRANE-PROTEIN-PROTEOLYSIS                 | 5    | -0.284848 | -0.643041 | 0.881944  | 0.952922  | 1.000      |
| 277  | GOBP-REGULATION-OF-NEURON-DIFFERENTIATION         | 11   | -0.215800 | -0.649973 | 0.912621  | 0.947936  | 1.000      |
| 278  | GOBP-DEVELOPMENTAL-PROCESS_INVOLVED_IN_REPRODU... | 10   | -0.226968 | -0.655576 | 0.882793  | 0.944404  | 1.000      |
| 279  | GOBP-NEGATIVE-REGULATION-OF-TRANSCRIPTION_BY_R... | 12   | -0.208271 | -0.657235 | 0.916667  | 0.944770  | 1.000      |
| 280  | GOBP-REGULATION-OF-PROTEOLYSIS                    | 6    | -0.269659 | -0.660083 | 0.867882  | 0.944001  | 1.000      |
| 281  | GOBP-MYELOID-LEUKOCYTE-MEDIATED-IMMUNITY          | 7    | -0.259259 | -0.665538 | 0.885906  | 0.940047  | 1.000      |
| 282  | GOBP-POSITIVE-REGULATION-OF-CYTOKINE-PRODUCTION   | 6    | -0.269659 | -0.667967 | 0.873239  | 0.939627  | 1.000      |
| 283  | GOBP-CELL-ACTIVATION_INVOLVED_IN-IMMUNE-RESPONSE  | 6    | -0.269659 | -0.668550 | 0.895455  | 0.941036  | 1.000      |
| 284  | REACTOME-NEUTROPHIL-DEGRANULATION                 | 8    | -0.247295 | -0.671180 | 0.877996  | 0.940182  | 1.000      |
| 285  | GOBP-SENSORY-ORGAN-DEVELOPMENT                    | 12   | -0.215408 | -0.675545 | 0.890215  | 0.937450  | 1.000      |
| 286  | GOBP-MACROMOLECULE-CATABOLIC-PROCESS              | 8    | -0.256322 | -0.677363 | 0.866051  | 0.937491  | 1.000      |
| 287  | GOBP-PROTEIN-CATABOLIC-PROCESS                    | 7    | -0.259259 | -0.677878 | 0.841014  | 0.938894  | 1.000      |
| 288  | GOBP-REGULATION-OF-LIPID_METABOLIC_PROCESS        | 15   | -0.204562 | -0.681852 | 0.871122  | 0.936345  | 1.000      |
| 289  | REACTOME-NERVOUS-SYSTEM-DEVELOPMENT               | 6    | -0.283584 | -0.684116 | 0.848233  | 0.935664  | 1.000      |
| 290  | GOBP-FATTY-ACID-TRANSPORT                         | 16   | -0.203320 | -0.688312 | 0.880488  | 0.932763  | 1.000      |
| 291  | GOBP-REGULATION-OF-DNA-BINDING-TRANSCRIPTION_F... | 5    | -0.301205 | -0.688983 | 0.856818  | 0.934121  | 1.000      |
| 292  | GOBP-REGULATION-OF-LYMPHOCYTE-ACTIVATION          | 18   | -0.204443 | -0.690701 | 0.903890  | 0.934360  | 1.000      |
| 293  | GOBP-RESPONSE-TO-PEPTIDE                          | 17   | -0.204443 | -0.692723 | 0.866828  | 0.934012  | 1.000      |
| 294  | GOBP-RESPONSE-TO-BIOTIC-STIMULUS                  | 5    | -0.301205 | -0.694311 | 0.842105  | 0.934121  | 1.000      |
| 295  | GOBP-NEGATIVE-REGULATION-OF-IMMUNE-SYSTEM-PROCESS | 5    | -0.308902 | -0.695608 | 0.851598  | 0.934644  | 1.000      |
| 296  | GOBP-MONOCARBOXYLIC-ACID-TRANSPORT                | 5    | -0.307242 | -0.695624 | 0.832589  | 0.936830  | 1.000      |
| 297  | GOBP-RESPONSE-TO-INTERLEUKIN_1                    | 6    | -0.293253 | -0.698087 | 0.828947  | 0.935812  | 1.000      |
| 298  | GOBP-GLUCOSE-METABOLIC-PROCESS                    | 6    | -0.293253 | -0.698087 | 0.828947  | 0.935812  | 1.000      |

Continuation of Table S11

|     | NAME                                              | ID            | SIZE | ES        | NES       | NOM.p.val | FDR.q.val | PWER.p.val |
|-----|---------------------------------------------------|---------------|------|-----------|-----------|-----------|-----------|------------|
| 299 | GOBP-ACIDIC-AMINO-ACID-TRANSPORT                  | GO-0015800    | 5    | -0.308902 | -0.701007 | 0.813901  | 0.934403  | 1.000      |
| 300 | REACTOME-INNATE-IMMUNE-SYSTEM                     | R-RNO-168249  | 16   | -0.204625 | -0.702432 | 0.873418  | 0.934737  | 1.000      |
| 301 | GOBP-DICARBOXYLIC-ACID-TRANSPORT                  | GO-0006835    | 5    | -0.308902 | -0.703640 | 0.827887  | 0.935347  | 1.000      |
| 302 | GOBP-ANATOMICAL-STRUCTURE-HOMEOSTASIS             | GO-0060249    | 7    | -0.279928 | -0.707145 | 0.836559  | 0.932640  | 1.000      |
| 303 | GOBP-REGULATION-OF-EXTRINSIC-APOPTOTIC-SIGNAL...  | GO-2001236    | 6    | -0.294985 | -0.712982 | 0.794702  | 0.927117  | 1.000      |
| 304 | GOBP-MONOSACCHARIDE-METABOLIC-PROCESS             | GO-0005996    | 6    | -0.293253 | -0.723077 | 0.816742  | 0.914954  | 1.000      |
| 305 | REACTOME-INTERLEUKIN_17-SIGNALING                 | R-RNO-448424  | 6    | -0.298419 | -0.726614 | 0.811927  | 0.912056  | 1.000      |
| 306 | GOBP-MUSCLE-CELL-DEVELOPMENT                      | GO-0055001    | 5    | -0.320854 | -0.728444 | 0.809313  | 0.911832  | 1.000      |
| 307 | GOBP-LYMPHOCYTE-ACTIVATION                        | GO-0046649    | 9    | -0.250399 | -0.728843 | 0.814480  | 0.913422  | 1.000      |
| 308 | GOBP-SMALL-MOLECULE-METABOLIC-PROCESS             | GO-0044281    | 15   | -0.224832 | -0.731900 | 0.827586  | 0.911452  | 1.000      |
| 309 | GOBP-SPROUTING-ANGIOGENESIS                       | GO-0002040    | 5    | -0.317531 | -0.734660 | 0.780911  | 0.909667  | 1.000      |
| 310 | GOBP-FOREBRAIN-DEVELOPMENT                        | GO-0030900    | 9    | -0.263111 | -0.736853 | 0.808756  | 0.908416  | 1.000      |
| 311 | GOBP-ADENYLATE-CYCLASE-INHIBITING-G-PROTEIN_CO... | GO-0007196    | 5    | -0.325301 | -0.737170 | 0.773365  | 0.910209  | 1.000      |
| 312 | GOBP-FAT-CELL-DIFFERENTIATION                     | GO-0045444    | 9    | -0.265600 | -0.739438 | 0.801782  | 0.908874  | 1.000      |
| 313 | GOBP-NEGATIVE-REGULATION-OF-MULTICELLULAR_ORGA... | GO-0051241    | 15   | -0.222144 | -0.740049 | 0.840095  | 0.910257  | 1.000      |
| 314 | GOBP-LONG-TERM-SYNAPTIC-POTENTIATION              | GO-0060291    | 12   | -0.239148 | -0.741261 | 0.821101  | 0.910670  | 1.000      |
| 315 | GOBP-POSITIVE-REGULATION-OF-NEURON-DEATH          | GO-1901216    | 5    | -0.320817 | -0.742290 | 0.791111  | 0.911553  | 1.000      |
| 316 | GOBP-TRANSMEMBRANE-RECEPTOR-PROTEIN-SERINE_THR... | GO-0007178    | 6    | -0.304878 | -0.745276 | 0.765700  | 0.909174  | 1.000      |
| 317 | GOBP-CELLULAR-RESPONSE-TO-ABIOTIC-STIMULUS        | GO-0071214    | 7    | -0.295278 | -0.745740 | 0.772727  | 0.910701  | 1.000      |
| 318 | REACTOME-PTEN-REGULATION                          | R-RNO-6807070 | 5    | -0.323984 | -0.746391 | 0.776190  | 0.911881  | 1.000      |
| 319 | REACTOME-ESTROGEN-DEPENDENT-NUCLEAR-EVENTS-DOW... | R-RNO-9634638 | 5    | -0.331505 | -0.747471 | 0.774194  | 0.912348  | 1.000      |
| 320 | HALLMARK-HYPOXIA                                  | M5891         | 5    | -0.325574 | -0.749039 | 0.778539  | 0.912065  | 1.000      |
| 321 | GOBP-NEGATIVE-REGULATION-OF-PROTEIN-CATABOLIC...  | GO-0042177    | 5    | -0.326477 | -0.749072 | 0.765086  | 0.914293  | 1.000      |
| 322 | GOBP-POSITIVE-REGULATION-OF-SYNAPTIC-TRANSMISSION | GO-0050806    | 15   | -0.220952 | -0.749122 | 0.810127  | 0.916499  | 1.000      |
| 323 | GOBP-EPITHELIAL-CELL-DIFFERENTIATION              | GO-0030855    | 7    | -0.288901 | -0.755181 | 0.783550  | 0.909189  | 1.000      |
| 324 | GOBP-ENDOTHELIAL-CELL-MIGRATION                   | GO-0043542    | 8    | -0.283127 | -0.757845 | 0.772627  | 0.907374  | 1.000      |
| 325 | GOBP-CYTOKINE-PRODUCTION                          | GO-0001816    | 10   | -0.269231 | -0.758496 | 0.777778  | 0.908540  | 1.000      |
| 326 | GOBP-RESPONSE-TO-ENDOGENOUS-STIMULUS              | GO-0009719    | 34   | -0.190516 | -0.759401 | 0.806701  | 0.909379  | 1.000      |
| 327 | GOBP-LIPID-METABOLIC-PROCESS                      | GO-0006629    | 10   | -0.262501 | -0.762689 | 0.749431  | 0.906802  | 1.000      |
| 328 | GOBP-RAS-PROTEIN-SIGNAL-TRANSDUCTION              | GO-0007265    | 5    | -0.332501 | -0.762930 | 0.745182  | 0.908649  | 1.000      |
| 329 | GOBP-REPRODUCTIVE-SYSTEM-DEVELOPMENT              | GO-0061458    | 6    | -0.315536 | -0.763075 | 0.749436  | 0.910766  | 1.000      |
| 330 | GOBP-CELLULAR-RESPONSE-TO-EXTERNAL-STIMULUS       | GO-0071496    | 10   | -0.267887 | -0.766684 | 0.763855  | 0.907215  | 1.000      |
| 331 | GOBP-BLOOD-VESSEL-ENDOTHELIAL-CELL-MIGRATION      | GO-0043534    | 8    | -0.283127 | -0.769042 | 0.774038  | 0.905680  | 1.000      |
| 332 | GOBP-CELLULAR-RESPONSE-TO-INORGANIC-SUBSTANCE     | GO-0071241    | 11   | -0.259288 | -0.773824 | 0.755294  | 0.900322  | 1.000      |
| 333 | REACTOME-INTEGRATION-OF-ENERGY-METABOLISM         | R-RNO-163685  | 5    | -0.349398 | -0.775081 | 0.707944  | 0.900636  | 1.000      |
| 334 | GOBP-CELLULAR-GLUCOSE-HOMEOSTASIS                 | GO-0001678    | 5    | -0.346620 | -0.780082 | 0.736170  | 0.894328  | 1.000      |
| 335 | GOBP-POSITIVE-REGULATION-OF-AXONOGENESIS          | GO-0050772    | 5    | -0.351033 | -0.781171 | 0.704289  | 0.894677  | 1.000      |
| 336 | REACTOME-TRANSCRIPTIONAL-REGULATION-BY_TP53       | R-RNO-3700989 | 6    | -0.324536 | -0.782046 | 0.723595  | 0.895581  | 1.000      |
| 337 | GOBP-REGULATION-OF-PROTEIN-CATABOLIC-PROCESS      | GO-0042176    | 7    | -0.307750 | -0.784342 | 0.716312  | 0.894014  | 1.000      |
| 338 | GOBP-NEGATIVE-REGULATION-OF-PHOSPHORUS-METABOL... | GO-0010563    | 9    | -0.281844 | -0.787856 | 0.744240  | 0.890415  | 1.000      |
| 339 | GOBP-CELL-CYCLE                                   | GO-0007049    | 21   | -0.228462 | -0.791204 | 0.729798  | 0.887067  | 1.000      |
| 340 | GOBP-MUSCLE-CELL-DIFFERENTIATION                  | GO-0042692    | 10   | -0.275592 | -0.795760 | 0.725962  | 0.881622  | 1.000      |
| 341 | GOBP-NEGATIVE-REGULATION-OF_CELL_PROJECTION_OR... | GO-0031345    | 5    | -0.348812 | -0.797818 | 0.718681  | 0.880271  | 1.000      |

Continuation of Table S11

|     | NAME                                              | ID            | SIZE | ES        | NES       | NOM.p.val | FDR.q.val | FWER.p.val |
|-----|---------------------------------------------------|---------------|------|-----------|-----------|-----------|-----------|------------|
| 342 | GOBP-REGIONALIZATION                              | GO-0003002    | 6    | -0.334450 | -0.801745 | 0.651316  | 0.876002  | 1.000      |
| 343 | GOBP-TUBE.MORPHOGENESIS                           | GO-0035239    | 15   | -0.242575 | -0.804184 | 0.717540  | 0.874035  | 1.000      |
| 344 | REACTOME-SENESCENCE-ASSOCIATED-SECRETORY-PHENO... | R-RNO-2559582 | 6    | -0.335032 | -0.804710 | 0.706897  | 0.875521  | 1.000      |
| 345 | GOBP-NEGATIVE-REGULATION-OF-CELLULAR-COMPONENT... | GO-0051129    | 11   | -0.268916 | -0.805780 | 0.712941  | 0.876019  | 1.000      |
| 346 | GOBP-RESPONSE-TO-HEAT                             | GO-0009408    | 7    | -0.319900 | -0.807277 | 0.702280  | 0.875623  | 1.000      |
| 347 | GOBP-RESPONSE-TO-TUMOR-NECROSIS-FACTOR            | GO-0034612    | 7    | -0.311517 | -0.807476 | 0.659722  | 0.877682  | 1.000      |
| 348 | GOBP-PATTERN-SPECIFICATION-PROCESS                | GO-0007389    | 6    | -0.334450 | -0.808249 | 0.699152  | 0.878653  | 1.000      |
| 349 | GOBP-REGULATION-OF-SMALL-MOLECULE-METABOLIC-PR... | GO-0062012    | 9    | -0.286530 | -0.811637 | 0.725664  | 0.874773  | 1.000      |
| 350 | GOBP-AMEBOIDAL-TYPE-CELL-MIGRATION                | GO-0001667    | 11   | -0.264891 | -0.812548 | 0.704225  | 0.875468  | 1.000      |
| 351 | GOBP-NEGATIVE-REGULATION-OF-CATABOLIC-PROCESS     | GO-0009895    | 8    | -0.304186 | -0.815049 | 0.699580  | 0.873390  | 1.000      |
| 352 | HALLMARK-TNFA-SIGNALING-VIA-NFKB                  | M5890         | 14   | -0.256757 | -0.818429 | 0.705736  | 0.869578  | 1.000      |
| 353 | GOBP-LEUKOCYTE-MEDIATED-IMMUNITY                  | GO-0002443    | 7    | -0.326653 | -0.819113 | 0.690171  | 0.870697  | 1.000      |
| 354 | GOBP-POSITIVE-REGULATION-OF-CATALYTIC-ACTIVITY    | GO-0043085    | 30   | -0.206873 | -0.819280 | 0.734211  | 0.872781  | 1.000      |
| 355 | GOBP-NEGATIVE-REGULATION-OF-CATALYTIC-ACTIVITY    | GO-0043086    | 17   | -0.233521 | -0.821300 | 0.696833  | 0.871339  | 1.000      |
| 356 | GOBP-CELL-CYCLE-PROCESS                           | GO-0022402    | 11   | -0.271568 | -0.826031 | 0.694915  | 0.864647  | 1.000      |
| 357 | REACTOME-CELLULAR-SENESCENCE                      | R-RNO-2559583 | 6    | -0.335032 | -0.828571 | 0.663462  | 0.862387  | 1.000      |
| 358 | REACTOME-INTRACELLULAR-SIGNALING-BY-SECOND-MES... | R-RNO-9006925 | 15   | -0.252302 | -0.830639 | 0.703529  | 0.860774  | 1.000      |
| 359 | GOBP-POSITIVE-REGULATION-OF-NEURON-PROJECTION...  | GO-0010976    | 5    | -0.372420 | -0.832378 | 0.668919  | 0.860023  | 1.000      |
| 360 | GOBP-REGULATION-OF-CELLULAR-RESPONSE-TO-STRESS    | GO-0080135    | 9    | -0.304897 | -0.832561 | 0.660173  | 0.862113  | 1.000      |
| 361 | GOBP-NEURON-MIGRATION                             | GO-0001764    | 5    | -0.367985 | -0.832772 | 0.647186  | 0.864229  | 1.000      |
| 362 | GOBP-NEGATIVE-REGULATION-OF-HYDROLASE-ACTIVITY    | GO-0051346    | 11   | -0.285178 | -0.837472 | 0.667513  | 0.858269  | 1.000      |
| 363 | GOBP-SIGNAL-RELEASE                               | GO-0023061    | 14   | -0.258677 | -0.837683 | 0.702765  | 0.860287  | 1.000      |
| 364 | GOBP-TUBE-DEVELOPMENT                             | GO-0035295    | 18   | -0.241712 | -0.839918 | 0.694789  | 0.858677  | 1.000      |
| 365 | GOBP-CARBOHYDRATE-HOMEOSTASIS                     | GO-0033500    | 7    | -0.324111 | -0.843211 | 0.638767  | 0.854445  | 1.000      |
| 366 | GOBP-NEGATIVE-REGULATION-OF-BIOSYNTHETIC-PROCESS  | GO-0009890    | 13   | -0.269100 | -0.843599 | 0.642298  | 0.856217  | 1.000      |
| 367 | GOBP-MATERNAL-PROCESS-INVOLVED-IN-FEMALE-PREGN... | GO-0060135    | 5    | -0.378671 | -0.849495 | 0.612245  | 0.846914  | 1.000      |
| 368 | GOBP-T-CELL-ACTIVATION                            | GO-0042110    | 8    | -0.313698 | -0.851963 | 0.619450  | 0.844440  | 1.000      |
| 369 | GOBP-REGULATION-OF-IMMUNE-RESPONSE                | GO-0050776    | 12   | -0.269079 | -0.856588 | 0.646789  | 0.838087  | 1.000      |
| 370 | GOBP-RESPONSE-TO-METAL-ION                        | GO-0010038    | 15   | -0.259735 | -0.856653 | 0.639798  | 0.840387  | 1.000      |
| 371 | GOBP-RESPONSE-TO-TEMPERATURE-STIMULUS             | GO-0009266    | 9    | -0.306770 | -0.857408 | 0.622768  | 0.841448  | 1.000      |
| 372 | GOBP-POSITIVE-REGULATION-OF-NERVOUS-SYSTEM-DEV... | GO-0051962    | 12   | -0.282567 | -0.859499 | 0.630137  | 0.840010  | 1.000      |
| 373 | GOBP-SECOND-MESSENGER-MEDIATED-SIGNALING          | GO-0019932    | 16   | -0.258510 | -0.859891 | 0.641509  | 0.841717  | 1.000      |
| 374 | GOBP-CELL-PART-MORPHOGENESIS                      | GO-0032990    | 24   | -0.233945 | -0.860018 | 0.668317  | 0.843864  | 1.000      |
| 375 | GOBP-POSITIVE-REGULATION-OF-MOLECULAR-FUNCTION    | GO-0044093    | 38   | -0.208895 | -0.861152 | 0.708543  | 0.844159  | 1.000      |
| 376 | GOBP-SMALL-GTPASE-MEDIATED-SIGNAL-TRANSDUCTION    | GO-0007264    | 8    | -0.320989 | -0.863386 | 0.598639  | 0.842199  | 1.000      |
| 377 | GOBP-PROTEIN-DEPHOSPHORYLATION                    | GO-0006470    | 7    | -0.364037 | -0.864037 | 0.613839  | 0.843434  | 1.000      |
| 378 | GOBP-POSITIVE-REGULATION-OF-CELL-DEVELOPMENT      | GO-0010720    | 12   | -0.282567 | -0.864345 | 0.634091  | 0.845369  | 1.000      |
| 379 | GOBP-MUSCLE-STRUCTURE-DEVELOPMENT                 | GO-0061061    | 16   | -0.263372 | -0.864734 | 0.631336  | 0.847185  | 1.000      |
| 380 | GOBP-MYELOID-LEUKOCYTE-ACTIVATION                 | GO-0002274    | 8    | -0.323697 | -0.871687 | 0.583732  | 0.836091  | 1.000      |
| 381 | GOBP-STRIATED-MUSCLE-CELL-DIFFERENTIATION         | GO-0051146    | 9    | -0.310895 | -0.871731 | 0.615044  | 0.838494  | 1.000      |
| 382 | GOBP-DEPHOSPHORYLATION                            | GO-0016311    | 7    | -0.341408 | -0.872111 | 0.606593  | 0.840197  | 1.000      |
| 383 | GOBP-CELL-MORPHOGENESIS                           | GO-0000902    | 24   | -0.233945 | -0.878377 | 0.633417  | 0.830476  | 1.000      |
| 384 | GOBP-CELLULAR-COMPONENT-MORPHOGENESIS             | GO-0032989    | 24   | -0.233945 | -0.879280 | 0.618421  | 0.831209  | 1.000      |

Continuation of Table S11

|     | NAME                                              | ID           | SIZE | ES        | NES       | NOM.p.val | FDR.q.val | FWER.p.val |
|-----|---------------------------------------------------|--------------|------|-----------|-----------|-----------|-----------|------------|
| 385 | GOBP-REGULATION-OF-TRANSFERASE-ACTIVITY           | GO-0051338   | 22   | -0.242689 | -0.879610 | 0.629108  | 0.833170  | 1.000      |
| 386 | GOBP-POSITIVE-REGULATION-OF-NEUROGENESIS          | GO-0050769   | 12   | -0.282567 | -0.880404 | 0.600000  | 0.834143  | 1.000      |
| 387 | GOBP-RESPONSE-TO-REACTIVE-OXYGEN-SPECIES          | GO-0000302   | 8    | -0.328910 | -0.880405 | 0.598684  | 0.836655  | 1.000      |
| 388 | GOBP-AGING                                        | GO-0007568   | 13   | -0.274918 | -0.881289 | 0.632850  | 0.837252  | 1.000      |
| 389 | GOBP-REGULATION-OF-PROTEIN-KINASE-ACTIVITY        | GO-0045859   | 22   | -0.242689 | -0.884060 | 0.629268  | 0.834164  | 1.000      |
| 390 | REACTOME-SIGNALING-BY-INTERLEUKINS                | R-RNO-449147 | 15   | -0.275931 | -0.886121 | 0.588372  | 0.832399  | 1.000      |
| 391 | GOBP-IN-UTERO-EMBRYONIC-DEVELOPMENT               | GO-0001701   | 8    | -0.326012 | -0.887219 | 0.578947  | 0.832700  | 1.000      |
| 392 | GOBP-RESPONSE-TO-OXIDATIVE-STRESS                 | GO-0006979   | 8    | -0.328910 | -0.888782 | 0.612832  | 0.832228  | 1.000      |
| 393 | GOBP-GROWTH                                       | GO-0040007   | 14   | -0.274933 | -0.890512 | 0.589681  | 0.831507  | 1.000      |
| 394 | GOBP-POSITIVE-REGULATION-OF-BINDING               | GO-0051099   | 6    | -0.375421 | -0.902941 | 0.576200  | 0.809259  | 1.000      |
| 395 | GOBP-NEGATIVE-REGULATION-OF-GENE-EXPRESSION       | GO-0010629   | 12   | -0.294195 | -0.910059 | 0.580866  | 0.797277  | 1.000      |
| 396 | GOBP-CELLULAR-RESPONSE-TO-LIPID                   | GO-00071396  | 15   | -0.267680 | -0.910147 | 0.544776  | 0.799546  | 1.000      |
| 397 | GOBP-NEGATIVE-REGULATION-OF-CELL-POPULATION-PR... | GO-0008285   | 9    | -0.327903 | -0.910835 | 0.571101  | 0.800834  | 1.000      |
| 398 | GOBP-DENDRITE-MORPHOGENESIS                       | GO-0048813   | 6    | -0.376298 | -0.911757 | 0.577273  | 0.801541  | 1.000      |
| 399 | GOBP-REGULATION-OF-DEVELOPMENTAL-GROWTH           | GO-0048638   | 9    | -0.323231 | -0.915726 | 0.561905  | 0.796034  | 1.000      |
| 400 | GOBP-NEGATIVE-REGULATION-OF-ANION-TRANSPORT       | GO-1903792   | 8    | -0.337424 | -0.918697 | 0.518779  | 0.792587  | 1.000      |
| 401 | GOBP-RESPONSE-TO-KETONE                           | GO-1901654   | 7    | -0.358025 | -0.924728 | 0.509091  | 0.783122  | 1.000      |
| 402 | GOBP-REGULATION-OF-CELL-CYCLE-PROCESS             | GO-0010564   | 5    | -0.409639 | -0.925832 | 0.508584  | 0.783162  | 1.000      |
| 403 | GOBP-CELLULAR-RESPONSE-TO-EXTRACELLULAR-STIMULUS  | GO-0031668   | 8    | -0.346803 | -0.929313 | 0.538462  | 0.778878  | 1.000      |
| 404 | GOBP-POSITIVE-REGULATION-OF-PRL-MIRNA-TRANSCRI... | GO-1902895   | 7    | -0.357373 | -0.929771 | 0.512987  | 0.780376  | 1.000      |
| 405 | GOBP-GLIOGENESIS                                  | GO-0042063   | 12   | -0.308196 | -0.932110 | 0.507576  | 0.777902  | 1.000      |
| 406 | GOBP-REGULATION-OF-VASCULATURE-DEVELOPMENT        | GO-1901342   | 5    | -0.409639 | -0.932877 | 0.527964  | 0.778805  | 1.000      |
| 407 | GOBP-ORGANONITROGEN-COMPOUND-CATABOLIC-PROCESS    | GO-1901565   | 9    | -0.335179 | -0.933142 | 0.529817  | 0.780749  | 1.000      |
| 408 | GOBP-REGULATION-OF-CELL-DEATH                     | GO-0010941   | 34   | -0.230783 | -0.933885 | 0.593516  | 0.781664  | 1.000      |
| 409 | GOBP-RESPONSE-TO-OXYGEN-CONTAINING-COMPOUND       | GO-1901700   | 39   | -0.223029 | -0.938172 | 0.538265  | 0.775290  | 1.000      |
| 410 | GOBP-CELL-JUNCTION-ASSEMBLY                       | GO-0034329   | 8    | -0.347106 | -0.940314 | 0.529284  | 0.773229  | 1.000      |
| 411 | GOBP-PRL-MIRNA-TRANSCRIPTION-BY-RNA-POLYMERASE-II | GO-0061614   | 7    | -0.357373 | -0.940976 | 0.535354  | 0.774328  | 1.000      |
| 412 | GOBP-POSITIVE-REGULATION-OF-SIGNALING             | GO-0023056   | 34   | -0.233395 | -0.943714 | 0.540540  | 0.770991  | 1.000      |
| 413 | GOBP-RESPONSE-TO-NICOTINE                         | GO-0035094   | 7    | -0.372282 | -0.945054 | 0.500000  | 0.770783  | 1.000      |
| 414 | GOBP-REGULATION-OF-ANATOMICAL-STRUCTURE-MORPHO... | GO-0022603   | 17   | -0.270747 | -0.945691 | 0.513761  | 0.772012  | 1.000      |
| 415 | GOBP-PEPTIDYL-LYSINE-MODIFICATION                 | GO-0018205   | 5    | -0.421687 | -0.947734 | 0.463636  | 0.770260  | 1.000      |
| 416 | GOBP-MULTI-ORGANISM-PROCESS                       | GO-0051704   | 16   | -0.268408 | -0.947898 | 0.516908  | 0.772471  | 1.000      |
| 417 | GOBP-NEGATIVE-REGULATION-OF-LOCOMOTION            | GO-0040013   | 5    | -0.411548 | -0.950942 | 0.486486  | 0.769095  | 1.000      |
| 418 | GOBP-RESPONSE-TO-CALCIUM-ION                      | GO-0051592   | 6    | -0.397419 | -0.952814 | 0.512472  | 0.767958  | 1.000      |
| 419 | GOBP-RESPONSE-TO-INSULIN                          | GO-0032868   | 5    | -0.421687 | -0.954913 | 0.460385  | 0.766197  | 1.000      |
| 420 | GOBP-RHYTHMIC-PROCESS                             | GO-0048511   | 15   | -0.289539 | -0.960088 | 0.502193  | 0.758422  | 1.000      |
| 421 | GOBP-CARDIAC-MUSCLE-TISSUE-DEVELOPMENT            | GO-0048738   | 6    | -0.399005 | -0.961195 | 0.473804  | 0.758543  | 1.000      |
| 422 | GOBP-RESPONSE-TO-UV                               | GO-0009411   | 5    | -0.421687 | -0.962103 | 0.460215  | 0.759130  | 1.000      |
| 423 | GOBP-HEART-DEVELOPMENT                            | GO-0007507   | 6    | -0.399005 | -0.966126 | 0.513825  | 0.753252  | 1.000      |
| 424 | GOBP-INTRACELLULAR-RECEPTOR-SIGNALING-PATHWAY     | GO-0030522   | 5    | -0.421687 | -0.974270 | 0.446390  | 0.738748  | 1.000      |
| 425 | GOBP-REGULATION-OF-CATABOLIC-PROCESS              | GO-0009894   | 13   | -0.304496 | -0.974811 | 0.479167  | 0.740086  | 1.000      |
| 426 | HALLMARK-APOPTOSIS                                | M5902        | 6    | -0.402439 | -0.976512 | 0.442890  | 0.738801  | 1.000      |
| 427 | GOBP-ORGANOPHOSPHATE-METABOLIC-PROCESS            | GO-0019637   | 7    | -0.383814 | -0.976890 | 0.444196  | 0.740538  | 1.000      |

Continuation of Table S11

|     | NAME                                              | ID            | SIZE | ES        | NES       | NOM.p.val | FDR.q.val | FWER.p.val |
|-----|---------------------------------------------------|---------------|------|-----------|-----------|-----------|-----------|------------|
| 428 | GOBP.EPIDERMIS_DEVELOPMENT                        | GO-0008544    | 5    | -0.429430 | -0.981328 | 0.453901  | 0.733757  | 1.000      |
| 429 | GOBP.RESPONSE.TO.NITROGEN.COMPOUND                | GO-1901698    | 34   | -0.242459 | -0.984378 | 0.489189  | 0.729904  | 1.000      |
| 430 | GOBP.FC.RECEPTOR_SIGNALING.PATHWAY                | GO-0038093    | 8    | -0.367628 | -0.985707 | 0.466488  | 0.729748  | 1.000      |
| 431 | GOBP.GLIAL.CELL.DIFFERENTIATION                   | GO-0010001    | 10   | -0.328888 | -0.986562 | 0.439636  | 0.730557  | 1.000      |
| 432 | REACTOME_SIGNALING_BY_RHO_GTPASES_MIRO_GTPASES... | R-RNO-9716542 | 10   | -0.358318 | -0.987619 | 0.441704  | 0.730941  | 1.000      |
| 433 | GOBP.NEGATIVE.REGULATION.OF.SIGNALING             | GO-0023057    | 21   | -0.271482 | -0.991009 | 0.476886  | 0.726425  | 1.000      |
| 434 | REACTOME_G_ALPHA_I_SIGNALING_EVENTS               | R-RNO-118594  | 18   | -0.291099 | -0.991084 | 0.469586  | 0.728795  | 1.000      |
| 435 | GOBP.POSITIVE.REGULATION.OF.DEVELOPMENTAL_PROCESS | GO-0051094    | 32   | -0.249293 | -0.994182 | 0.467934  | 0.725033  | 1.000      |
| 436 | GOBP.CIRCULATORY_SYSTEM_PROCESS                   | GO-0003013    | 5    | -0.439660 | -0.995168 | 0.439583  | 0.725659  | 1.000      |
| 437 | GOBP.MITOCHONDRION.ORGANIZATION                   | GO-0007005    | 7    | -0.392524 | -0.998847 | 0.439462  | 0.720145  | 1.000      |
| 438 | GOBP.POSITIVE.REGULATION.OF.GROWTH                | GO-0045927    | 9    | -0.362039 | -1.000936 | 0.457275  | 0.718351  | 1.000      |
| 439 | GOBP.IMMUNE.RESPONSE.REGULATING_SIGNALING_PATHWAY | GO-0002764    | 8    | -0.367628 | -1.002030 | 0.431718  | 0.718566  | 1.000      |
| 440 | GOBP.POSITIVE.REGULATION.OF.ION.TRANSPORT         | GO-0043270    | 17   | -0.294705 | -1.004698 | 0.452607  | 0.715351  | 1.000      |
| 441 | GOBP.POSITIVE.REGULATION.OF.TRANSCRIPTION_BY_R... | GO-0045944    | 24   | -0.267564 | -1.005569 | 0.448276  | 0.715883  | 1.000      |
| 442 | GOBP.RESPONSE.TOLLIPID                            | GO-0033993    | 19   | -0.291581 | -1.005700 | 0.431981  | 0.718279  | 1.000      |
| 443 | GOBP.REGULATION.OF.ENDOCYTOSIS                    | GO-0030100    | 6    | -0.393889 | -1.007133 | 0.396963  | 0.717957  | 1.000      |
| 444 | GOBP.NEGATIVE.REGULATION.OF.PEPTIDASE_ACTIVITY    | GO-0010466    | 6    | -0.403001 | -1.008248 | 0.408791  | 0.718233  | 1.000      |
| 445 | GOBP.REGULATION.OF.SYNAPSE_STRUCTURE_OR_ACTIVITY  | GO-0050803    | 11   | -0.344835 | -1.008382 | 0.434053  | 0.720594  | 1.000      |
| 446 | GOBP.NEGATIVE.REGULATION.OF.NEURON.DEATH          | GO-1901215    | 11   | -0.335921 | -1.012184 | 0.419431  | 0.715298  | 1.000      |
| 447 | GOBP.BLOOD.VESSEL.MORPHOGENESIS                   | GO-0048514    | 14   | -0.314399 | -1.012474 | 0.422604  | 0.717344  | 1.000      |
| 448 | GOBP.HORMONE.TRANSPORT                            | GO-0009914    | 9    | -0.367314 | -1.013092 | 0.454746  | 0.718774  | 1.000      |
| 449 | GOBP.REGULATION.OF_PHOSPHOLIPASE_ACTIVITY         | GO-0010517    | 6    | -0.421805 | -1.013275 | 0.433260  | 0.721144  | 1.000      |
| 450 | GOBP.POSITIVE.REGULATION.OF_TRANSPORT             | GO-0051050    | 26   | -0.260782 | -1.013471 | 0.418421  | 0.723443  | 1.000      |
| 451 | GOBP.EMBRYONIC.ORGAN.DEVELOPMENT                  | GO-0048568    | 7    | -0.402272 | -1.014816 | 0.407767  | 0.723365  | 1.000      |
| 452 | GOBP.REGULATION.OF.NERVOUS.SYSTEM.DEVELOPMENT     | GO-0051960    | 15   | -0.308777 | -1.020681 | 0.399072  | 0.713300  | 1.000      |
| 453 | REACTOME_RHO_GTPASE_EFFECTORS                     | R-RNO-195258  | 9    | -0.358318 | -1.022186 | 0.400911  | 0.712687  | 1.000      |
| 454 | GOBP.SKELETAL.MUSCLE.ORGAN.DEVELOPMENT            | GO-0060538    | 5    | -0.453676 | -1.022777 | 0.414847  | 0.714123  | 1.000      |
| 455 | GOBP.POSITIVE.REGULATION.OF.CATION.TRANSMEMBR...  | GO-1904064    | 5    | -0.457831 | -1.023281 | 0.405702  | 0.715794  | 1.000      |
| 456 | GOBP.MULTICELLULAR.ORGANISM.PROCESS               | GO-0044706    | 8    | -0.380294 | -1.031012 | 0.392202  | 0.702392  | 1.000      |
| 457 | REACTOME_ESR_MEDIATED_SIGNALING                   | R-RNO-8939211 | 8    | -0.381377 | -1.031156 | 0.417411  | 0.704776  | 1.000      |
| 458 | REACTOME_SIGNALING_BY_NUCLEAR_RECEPTORS           | R-RNO-9006931 | 8    | -0.381377 | -1.034182 | 0.402685  | 0.701087  | 1.000      |
| 459 | GOBP.POSITIVE.REGULATION.OF_ENDOTHELIAL_CELL_P... | GO-0001938    | 6    | -0.426829 | -1.035582 | 0.397727  | 0.701009  | 1.000      |
| 460 | GOBP.REGULATION.OF_FAT_CELL_DIFFERENTIATION       | GO-0045598    | 6    | -0.426829 | -1.043922 | 0.413721  | 0.686487  | 1.000      |
| 461 | GOBP.CELLULAR.MACROMOLECULE.CATABOLIC_PROCESS     | GO-0044265    | 6    | -0.434427 | -1.044203 | 0.395034  | 0.688561  | 1.000      |
| 462 | GOBP.DENDRITE.DEVELOPMENT                         | GO-0016358    | 9    | -0.370671 | -1.044955 | 0.377622  | 0.689636  | 1.000      |
| 463 | GOBP.REGULATION.OF_LIPASE_ACTIVITY                | GO-0060191    | 6    | -0.421805 | -1.045516 | 0.410314  | 0.691084  | 1.000      |
| 464 | REACTOME_NUCLEAR_EVENTS_KINASE_AND_TRANSCRIPTI... | R-RNO-198725  | 11   | -0.346103 | -1.048037 | 0.387097  | 0.688389  | 1.000      |
| 465 | GOBP.RESPONSE.TO.ACID.CHEMICAL                    | GO-0001101    | 6    | -0.429247 | -1.054035 | 0.362385  | 0.678548  | 1.000      |
| 466 | GOBP.TISSUE.MIGRATION                             | GO-0090130    | 9    | -0.375095 | -1.056320 | 0.369412  | 0.676626  | 1.000      |
| 467 | REACTOME_EXTRA_NUCLEAR_ESTROGEN_SIGNALING         | R-RNO-9009391 | 7    | -0.409420 | -1.056554 | 0.375000  | 0.678885  | 1.000      |
| 468 | GOBP.INFLAMMATORY_RESPONSE                        | GO-0006954    | 12   | -0.340398 | -1.057100 | 0.366162  | 0.680461  | 1.000      |
| 469 | GOBP.NERVE.DEVELOPMENT                            | GO-0021675    | 9    | -0.375723 | -1.057863 | 0.380952  | 0.681604  | 1.000      |
| 470 | GOBP.CELLULAR.COMPONENT_DISASSEMBLY               | GO-0022411    | 6    | -0.437583 | -1.060260 | 0.353201  | 0.679334  | 1.000      |

Continuation of Table S11

|     | NAME                                              | ID            | SIZE | ES        | NES       | NOM.p.val | FDR.q.val | FWER.p.val |
|-----|---------------------------------------------------|---------------|------|-----------|-----------|-----------|-----------|------------|
| 471 | GOBP-REGULATION-OF-NEUROGENESIS                   | GO-0050767    | 14   | -0.325453 | -1.060387 | 0.376417  | 0.681794  | 1.000      |
| 472 | GOBP-REGULATION-OF-CELLULAR-AMIDE-METABOLIC-PR... | GO-0034248    | 9    | -0.390062 | -1.060565 | 0.373550  | 0.684027  | 1.000      |
| 473 | REACTOME-SIGNALING-BY-RECEPTOR-TYROSINE-KINASES   | R-RNO-9006934 | 26   | -0.280017 | -1.062107 | 0.354460  | 0.683678  | 1.000      |
| 474 | GOBP-ENDOMEMBRANE-SYSTEM-ORGANIZATION             | GO-0010256    | 6    | -0.430845 | -1.069021 | 0.368664  | 0.671895  | 1.000      |
| 475 | GOBP-GLAND-DEVELOPMENT                            | GO-0048732    | 7    | -0.402467 | -1.069662 | 0.362637  | 0.673228  | 1.000      |
| 476 | GOBP-NUCLEOBASE-CONTAINING-SMALL-MOLECULE-META... | GO-0055086    | 6    | -0.428977 | -1.075120 | 0.352442  | 0.664571  | 1.000      |
| 477 | REACTOME-INTERLEUKIN-4-AND-INTERLEUKIN-13-SIGN... | R-RNO-6785807 | 8    | -0.404856 | -1.077324 | 0.346491  | 0.663043  | 1.000      |
| 478 | GOBP-NEGATIVE-REGULATION-OF-CYSTEINE-TYPE-ENDO... | GO-2000117    | 5    | -0.468326 | -1.078380 | 0.338144  | 0.663618  | 1.000      |
| 479 | GOBP-RESPONSE-TO-NERVE-GROWTH-FACTOR              | GO-1990089    | 7    | -0.423809 | -1.081504 | 0.356659  | 0.660073  | 1.000      |
| 480 | GOBP-CIRCADIEN-RHYTHM                             | GO-0007623    | 13   | -0.336001 | -1.083242 | 0.346983  | 0.659120  | 1.000      |
| 481 | GOBP-CELLULAR-LIPID-METABOLIC-PROCESS             | GO-0044255    | 7    | -0.432099 | -1.085232 | 0.337995  | 0.657629  | 1.000      |
| 482 | GOBP-REGULATION-OF-MUSCLE-ADAPTATION              | GO-0043502    | 5    | -0.485028 | -1.085627 | 0.330377  | 0.659557  | 1.000      |
| 483 | GOBP-POSITIVE-REGULATION-OF-CELL-DIFFERENTIATION  | GO-0044597    | 27   | -0.286857 | -1.088229 | 0.328395  | 0.657100  | 1.000      |
| 484 | GOBP-MUSCLE-ADAPTATION                            | GO-0043500    | 5    | -0.485028 | -1.090867 | 0.342553  | 0.654380  | 1.000      |
| 485 | REACTOME-ADAPTIVE-IMMUNE-SYSTEM                   | R-RNO-1280218 | 9    | -0.396149 | -1.090980 | 0.334831  | 0.656990  | 1.000      |
| 486 | GOBP-REGULATION-OF-ENDOTHELIAL-CELL-MIGRATION     | GO-0010594    | 5    | -0.469218 | -1.092217 | 0.339956  | 0.657177  | 1.000      |
| 487 | GOBP-MUSCLE-TISSUE-DEVELOPMENT                    | GO-0060537    | 11   | -0.364630 | -1.093953 | 0.310185  | 0.650247  | 1.000      |
| 488 | GOBP-REGULATION-OF-SYSTEM-PROCESS                 | GO-0044057    | 18   | -0.312299 | -1.095575 | 0.315534  | 0.655949  | 1.000      |
| 489 | GOBP-LEUKOCYTE-DIFFERENTIATION                    | GO-0002521    | 15   | -0.332221 | -1.096322 | 0.327059  | 0.657234  | 1.000      |
| 490 | GOBP-CELL-CELL-ADHESION                           | GO-0098609    | 14   | -0.336362 | -1.097380 | 0.328090  | 0.657673  | 1.000      |
| 491 | REACTOME-G-ALPHA-Q-SIGNALING-EVENTS               | R-RNO-116476  | 6    | -0.441481 | -1.097480 | 0.295872  | 0.660292  | 1.000      |
| 492 | GOBP-ACTIN-FILAMENT-BASED-PROCESS                 | GO-0030029    | 7    | -0.434950 | -1.099979 | 0.324885  | 0.657698  | 1.000      |
| 493 | GOBP-RESPONSE-TO-EXTRACELLULAR-STIMULUS           | GO-0009991    | 13   | -0.354342 | -1.102728 | 0.314088  | 0.654722  | 1.000      |
| 494 | GOBP-PROTEIN-MODIFICATION-BY-SMALL-PROTEIN-CON... | GO-0032446    | 6    | -0.451260 | -1.103399 | 0.322072  | 0.656258  | 1.000      |
| 495 | GOBP-CHROMOSOME-ORGANIZATION                      | GO-0051276    | 6    | -0.456582 | -1.103499 | 0.332558  | 0.658982  | 1.000      |
| 496 | GOBP-CELLULAR-RESPONSE-TO-NITROGEN-COMPOUND       | GO-1901699    | 20   | -0.304568 | -1.105511 | 0.314496  | 0.657665  | 1.000      |
| 497 | GOBP-CELLULAR-RESPONSE-TO-MOLECULE-OF-BACTERIA... | GO-0071219    | 8    | -0.414255 | -1.107187 | 0.338983  | 0.656965  | 1.000      |
| 498 | GOBP-CELLULAR-RESPONSE-TO-BIOTIC-STIMULUS         | GO-0071216    | 8    | -0.414255 | -1.108849 | 0.341743  | 0.656435  | 1.000      |
| 499 | GOBP-VASCULATURE-DEVELOPMENT                      | GO-0001944    | 17   | -0.329129 | -1.109046 | 0.307107  | 0.658942  | 1.000      |
| 500 | GOBP-NEGATIVE-REGULATION-OF-RESPONSE-TO-STIMULUS  | GO-0048585    | 16   | -0.329406 | -1.110165 | 0.311778  | 0.659424  | 1.000      |
| 501 | GOBP-POSTTRANSCRIPTIONAL-REGULATION-OF-GENE-EX... | GO-0010608    | 8    | -0.413927 | -1.110962 | 0.338747  | 0.660639  | 1.000      |
| 502 | GOBP-POSITIVE-REGULATION-OF-EPITHELIAL-CELL-PR... | GO-0050679    | 7    | -0.439593 | -1.111480 | 0.312217  | 0.662666  | 1.000      |
| 503 | GOBP-REGULATION-OF-PROTEIN-PHOSPHORYLATION        | GO-0001932    | 26   | -0.293559 | -1.111877 | 0.312039  | 0.664775  | 1.000      |
| 504 | REACTOME-G-PROTEIN-MEDIATED-EVENTS                | R-RNO-112040  | 9    | -0.405331 | -1.113472 | 0.312896  | 0.664544  | 1.000      |
| 505 | GOBP-RESPONSE-TO-BACTERIUM                        | GO-0009617    | 13   | -0.358277 | -1.114412 | 0.299766  | 0.665713  | 1.000      |
| 506 | GOBP-ENZYME-LINKED-RECEPTOR-PROTEIN-SIGNALING-... | GO-0007167    | 24   | -0.298400 | -1.114720 | 0.280952  | 0.668198  | 1.000      |
| 507 | GOBP-EXOCYTOSIS                                   | GO-0006887    | 11   | -0.373088 | -1.118984 | 0.303738  | 0.662121  | 1.000      |
| 508 | GOBP-REGULATION-OF-CELLULAR-LOCALIZATION          | GO-0060341    | 17   | -0.327939 | -1.120243 | 0.276543  | 0.662469  | 1.000      |
| 509 | GOBP-REGULATION-OF-HYDROLASE-ACTIVITY             | GO-0051336    | 22   | -0.304948 | -1.120986 | 0.305000  | 0.664010  | 1.000      |
| 510 | GOBP-REGULATION-OF-SECRETION                      | GO-0051046    | 14   | -0.340877 | -1.123877 | 0.288636  | 0.660600  | 1.000      |
| 511 | GOBP-RESPONSE-TO-MOLECULE-OF-BACTERIAL-ORIGIN     | GO-0002237    | 13   | -0.358277 | -1.126364 | 0.304850  | 0.658412  | 1.000      |
| 512 | GOBP-PROTEIN-AUTOPHOSPHORYLATION                  | GO-0046777    | 5    | -0.497262 | -1.126946 | 0.299776  | 0.660240  | 1.000      |
| 513 | GOBP-POSITIVE-REGULATION-OF-DEVELOPMENTAL-GROWTH  | GO-0048639    | 8    | -0.416174 | -1.128899 | 0.291566  | 0.658917  | 1.000      |



Continuation of Table S11

| NAME | ID                                                | SIZE | ES        | NES       | NOM.p.val | FDR.q.val | FWER.p.val |
|------|---------------------------------------------------|------|-----------|-----------|-----------|-----------|------------|
| 514  | GOBP-NEGATIVE-REGULATION-OF-NEURON-APOPTOTIC.P... | 8    | -0.414987 | -1.130412 | 0.309051  | 0.658857  | 1.000      |
| 515  | GOBP-PHAGOCYTOSIS                                 | 5    | -0.509836 | -1.143983 | 0.313559  | 0.632695  | 1.000      |
| 516  | REACTOME-CA-DEPENDENT-EVENTS                      | 8    | -0.422217 | -1.144941 | 0.280702  | 0.633807  | 1.000      |
| 517  | GOBP-RESPONSE-TO-CADMIUM-ION                      | 6    | -0.475866 | -1.148759 | 0.287016  | 0.628795  | 1.000      |
| 518  | GOBP-REGULATION-OF-CELLULAR-PROTEIN-LOCALIZATION  | 12   | -0.379526 | -1.150157 | 0.275463  | 0.629160  | 1.000      |
| 519  | GOBP-POSITIVE-REGULATION-OF-TRANSFERASE-ACTIVITY  | 20   | -0.322847 | -1.153459 | 0.251908  | 0.625623  | 1.000      |
| 520  | GOBP-POSITIVE-REGULATION-OF-BIOSYNTHETIC-PROCESS  | 27   | -0.300146 | -1.153824 | 0.248101  | 0.628072  | 1.000      |
| 521  | GOBP-DNA-METABOLIC-PROCESS                        | 6    | -0.479290 | -1.154001 | 0.262115  | 0.630914  | 1.000      |
| 522  | GOBP-POSITIVE-REGULATION-OF-GENE-EXPRESSION       | 16   | -0.338283 | -1.154576 | 0.258929  | 0.632854  | 1.000      |
| 523  | GOBP-MUSCLE-ORGAN-DEVELOPMENT                     | 9    | -0.405063 | -1.157730 | 0.270455  | 0.629164  | 1.000      |
| 524  | REACTOME-SIGNALING-BY-NTRKS                       | 18   | -0.338492 | -1.157962 | 0.263279  | 0.631988  | 1.000      |
| 525  | GOBP-NEGATIVE-REGULATION-OF-PROTEOLYSIS           | 8    | -0.429925 | -1.161640 | 0.260465  | 0.627181  | 1.000      |
| 526  | GOBP-DEVELOPMENTAL-GROWTH                         | 10   | -0.407473 | -1.166236 | 0.265823  | 0.620987  | 1.000      |
| 527  | REACTOME-SIGNALING-BY-NTRK2-TRKB                  | 6    | -0.470358 | -1.169336 | 0.252252  | 0.622740  | 1.000      |
| 528  | GOBP-INTRINSIC-APOPTOTIC-SIGNALING-PATHWAY        | 5    | -0.511537 | -1.168036 | 0.265589  | 0.623889  | 1.000      |
| 529  | GOBP-MYELOID-CELL-DIFFERENTIATION                 | 13   | -0.374590 | -1.171992 | 0.241218  | 0.624357  | 1.000      |
| 530  | GOBP-ORGAN-GROWTH                                 | 5    | -0.520901 | -1.171992 | 0.257143  | 0.621830  | 1.000      |
| 531  | GOBP-REGULATION-OF-CELLULAR-COMPONENT-BIOGENESIS  | 10   | -0.407796 | -1.172532 | 0.245033  | 0.623716  | 1.000      |
| 532  | GOBP-ENDOCYTOSIS                                  | 8    | -0.451996 | -1.174935 | 0.270089  | 0.621673  | 1.000      |
| 533  | HALLMARK-ALLOGRAFT-REJECTION                      | 7    | -0.451705 | -1.175717 | 0.242206  | 0.623391  | 1.000      |
| 534  | GOBP-PEPTIDE-SECRETION                            | 9    | -0.419296 | -1.176778 | 0.269136  | 0.624595  | 1.000      |
| 535  | GOBP-REGULATION-OF-HEMOPOIESIS                    | 10   | -0.401519 | -1.178265 | 0.226164  | 0.625035  | 1.000      |
| 536  | GOBP-REGULATION-OF-ORGAN-GROWTH                   | 5    | -0.520901 | -1.178843 | 0.264192  | 0.627318  | 1.000      |
| 537  | GOBP-ANIMAL-ORGAN-MORPHOGENESIS                   | 12   | -0.384453 | -1.179949 | 0.250608  | 0.628334  | 1.000      |
| 538  | GOBP-PEPTIDE-HORMONE-SECRETION                    | 7    | -0.462657 | -1.180585 | 0.227373  | 0.630647  | 1.000      |
| 539  | GOBP-NEGATIVE-REGULATION-OF-TRANSPORT             | 13   | -0.374087 | -1.181478 | 0.245700  | 0.632317  | 1.000      |
| 540  | GOBP-POSITIVE-REGULATION-OF-PROTEIN-KINASE-ACT... | 19   | -0.329468 | -1.182284 | 0.219388  | 0.634086  | 1.000      |
| 541  | GOBP-NEURON-DEATH                                 | 18   | -0.332965 | -1.182483 | 0.224344  | 0.637134  | 1.000      |
| 542  | GOBP-POSITIVE-REGULATION-OF-PROTEIN-METABOLIC...  | 28   | -0.305819 | -1.185579 | 0.219277  | 0.633776  | 1.000      |
| 543  | GOBP-POSITIVE-REGULATION-OF-EPITHELIAL-CELL-MI... | 5    | -0.522545 | -1.187202 | 0.257143  | 0.633882  | 1.000      |
| 544  | GOBP-MITOTIC-CELL-CYCLE                           | 10   | -0.408735 | -1.196900 | 0.238095  | 0.616369  | 1.000      |
| 545  | GOBP-REGULATION-OF-ANION-TRANSPORT                | 20   | -0.333087 | -1.200152 | 0.199531  | 0.613302  | 1.000      |
| 546  | GOBP-POSITIVE-REGULATION-OF-IMMUNE-SYSTEM-PROCESS | 18   | -0.343170 | -1.201359 | 0.231144  | 0.614200  | 1.000      |
| 547  | REACTOME-MAPK-TARGETS-NUCLEAR-EVENTS-MEDIATED...  | 5    | -0.531873 | -1.202588 | 0.259794  | 0.615350  | 1.000      |
| 548  | GOBP-REGULATION-OF-CELLULAR-CATABOLIC-PROCESS     | 10   | -0.417480 | -1.206441 | 0.235033  | 0.610388  | 1.000      |
| 549  | GOBP-PERIPHERAL-NERVOUS-SYSTEM-DEVELOPMENT        | 9    | -0.432363 | -1.209099 | 0.224622  | 0.608281  | 1.000      |
| 550  | GOBP-INSULIN-SECRETION                            | 7    | -0.462657 | -1.214204 | 0.220297  | 0.600374  | 1.000      |
| 551  | GOBP-RESPONSE-TO-STARVATION                       | 5    | -0.534429 | -1.215167 | 0.233100  | 0.601724  | 1.000      |
| 552  | GOBP-REGULATION-OF-MYELOID-CELL-DIFFERENTIATION   | 9    | -0.428584 | -1.215325 | 0.185268  | 0.604938  | 1.000      |
| 553  | GOBP-POSITIVE-REGULATION-OF-TRANSMEMBRANE_TRAN... | 7    | -0.469136 | -1.224432 | 0.209135  | 0.589792  | 1.000      |
| 554  | GOBP-ESTABLISHMENT-OF-PROTEIN-LOCALIZATION        | 18   | -0.352385 | -1.225421 | 0.185542  | 0.591255  | 1.000      |
| 555  | GOBP-REGULATION-OF-CIRCADIAN-RHYTHM               | 7    | -0.485904 | -1.229740 | 0.230769  | 0.585873  | 1.000      |
| 556  | REACTOME-EXTRACELLULAR-MATRIX-ORGANIZATION        | 5    | -0.528771 | -1.232212 | 0.189655  | 0.583885  | 1.000      |

Continuation of Table S11

| NAME                                                  | ID            | SIZE | ES        | NES       | NOM.p.val | FDR.q.val | FWER.p.val |
|-------------------------------------------------------|---------------|------|-----------|-----------|-----------|-----------|------------|
| 557 GOBP-BIOLOGICAL-ADHESION                          | GO-0022610    | 19   | -0.344879 | -1.232526 | 0.179612  | 0.586803  | 1.000      |
| 558 GOBP-REGULATION-OF-APOPTOTIC-SIGNALING-PATHWAY    | GO-2001233    | 10   | -0.419575 | -1.233713 | 0.209821  | 0.588060  | 1.000      |
| 559 GOBP-NEGATIVE-REGULATION-OF-RESPONSE-TO-EXTERN... | GO-0032102    | 5    | -0.528865 | -1.234965 | 0.216518  | 0.588902  | 1.000      |
| 560 GOBP-APOPTOTIC-MITOCHONDRIAL-CHANGES              | GO-0008637    | 6    | -0.523316 | -1.237878 | 0.219457  | 0.586277  | 1.000      |
| 561 GOBP-INTRACELLULAR-TRANSPORT                      | GO-0046907    | 11   | -0.407199 | -1.238383 | 0.208738  | 0.588858  | 1.000      |
| 562 GOBP-CELLULAR-RESPONSE-TO-STARVATION              | GO-0009267    | 5    | -0.534429 | -1.238448 | 0.211207  | 0.592492  | 1.000      |
| 563 GOBP-SENSORY-PERCEPTION-OF-PAIN                   | GO-0019233    | 5    | -0.556438 | -1.242430 | 0.225882  | 0.587266  | 1.000      |
| 564 REACTOME-OPIOID-SIGNALING                         | R-RNO-111885  | 12   | -0.405099 | -1.246191 | 0.182898  | 0.583488  | 1.000      |
| 565 GOBP-NEGATIVE-REGULATION-OF-PROTEIN-METABOLIC...  | GO-0051248    | 20   | -0.349207 | -1.249851 | 0.180974  | 0.579234  | 1.000      |
| 566 GOBP-MULTICELLULAR-ORGANISMAL-RESPONSE-TO-STRESS  | GO-0033555    | 5    | -0.551579 | -1.251002 | 0.212903  | 0.580755  | 1.000      |
| 567 GOBP-PROTEIN-LOCALIZATION-TO-ORGANELLE            | GO-0033365    | 9    | -0.459187 | -1.257994 | 0.211905  | 0.569801  | 1.000      |
| 568 GOBP-CELLULAR-RESPONSE-TO-CHEMICAL-STRESS         | GO-0062197    | 7    | -0.493212 | -1.259794 | 0.180365  | 0.569875  | 1.000      |
| 569 GOBP-EMBRYO-DEVELOPMENT-ENDING-IN-BIRTH-OR-EGG... | GO-0009792    | 9    | -0.448569 | -1.260423 | 0.206972  | 0.572279  | 1.000      |
| 570 GOBP-REGULATION-OF-CELL-DEVELOPMENT               | GO-0060284    | 15   | -0.382197 | -1.264667 | 0.188073  | 0.566753  | 1.000      |
| 571 GOBP-CELLULAR-RESPONSE-TO-REACTIVE-OXYGEN-SPECIES | GO-0034614    | 7    | -0.493212 | -1.266365 | 0.179426  | 0.567096  | 1.000      |
| 572 GOBP-MUSCLE-SYSTEM-PROCESS                        | GO-0003012    | 9    | -0.447964 | -1.269166 | 0.170115  | 0.565017  | 1.000      |
| 573 GOBP-REGULATION-OF-PHOSPHORUS-METABOLIC-PROCESS   | GO-0051174    | 27   | -0.329132 | -1.271459 | 0.154047  | 0.564183  | 1.000      |
| 574 GOBP-CELLULAR-RESPONSE-TO-OXYGEN-CONTAINING.CO... | GO-1901701    | 29   | -0.322270 | -1.272893 | 0.161376  | 0.565130  | 1.000      |
| 575 GOBP-CIRCULATORY-SYSTEM-DEVELOPMENT               | GO-0072359    | 21   | -0.346169 | -1.279052 | 0.152542  | 0.556300  | 1.000      |
| 576 REACTOME-FC-EPSILON-RECEPTOR-FCER1-SIGNALING      | R-RNO-2454202 | 7    | -0.501189 | -1.280601 | 0.167421  | 0.557180  | 1.000      |
| 577 GOBP-REGULATION-OF-VESICLE-MEDIATED-TRANSPORT     | GO-0060627    | 12   | -0.414013 | -1.282753 | 0.154964  | 0.556506  | 1.000      |
| 578 GOBP-INTRACELLULAR-PROTEIN-TRANSPORT              | GO-0006886    | 9    | -0.453770 | -1.284977 | 0.155660  | 0.555683  | 1.000      |
| 579 GOBP-REGULATION-OF-HORMONE-SECRETION              | GO-0046883    | 8    | -0.477997 | -1.285158 | 0.190588  | 0.559274  | 1.000      |
| 580 GOBP-PROTEIN-PHOSPHORYLATION                      | GO-0006468    | 34   | -0.319813 | -1.285706 | 0.120643  | 0.562099  | 1.000      |
| 581 GOBP-NEUROTROPHIN-TRK-RECEPTOR-SIGNALING-PATHWAY  | GO-0048011    | 6    | -0.536785 | -1.288560 | 0.179487  | 0.559957  | 1.000      |
| 582 GOBP-EMBRYONIC-MORPHOGENESIS                      | GO-0048598    | 6    | -0.534977 | -1.289572 | 0.171296  | 0.561904  | 1.000      |
| 583 GOBP-POSITIVE-REGULATION-OF-MULTICELLULAR-ORGA... | GO-0051240    | 32   | -0.329443 | -1.292199 | 0.132353  | 0.560299  | 1.000      |
| 584 GOBP-PEPTIDYL-TYROSINE-MODIFICATION               | GO-0018212    | 10   | -0.453646 | -1.304735 | 0.136771  | 0.538046  | 1.000      |
| 585 GOBP-NEGATIVE-REGULATION-OF-PROTEIN-MODIFICATI... | GO-0031400    | 10   | -0.451818 | -1.306018 | 0.150685  | 0.539412  | 1.000      |
| 586 GOBP-SECRETION                                    | GO-0046903    | 24   | -0.350144 | -1.308687 | 0.112782  | 0.537767  | 1.000      |
| 587 GOBP-POSITIVE-REGULATION-OF-NUCLEOBASE-CONTAIN... | GO-0045935    | 28   | -0.340671 | -1.314828 | 0.124352  | 0.529026  | 1.000      |
| 588 GOBP-NEGATIVE-REGULATION-OF-NEUROUS-SYSTEM.DEV... | GO-0051961    | 5    | -0.578964 | -1.315364 | 0.167800  | 0.531792  | 1.000      |
| 589 GOBP-ENDOTHELIAL-CELL-PROLIFERATION               | GO-0001935    | 8    | -0.478698 | -1.316020 | 0.162291  | 0.534343  | 1.000      |
| 590 GOBP-NEUROTROPHIN-SIGNALING-PATHWAY               | GO-0038179    | 6    | -0.536785 | -1.318328 | 0.177778  | 0.533873  | 1.000      |
| 591 GOBP-RESPONSE-TO-ALKALOID                         | GO-0043279    | 5    | -0.588934 | -1.318452 | 0.176734  | 0.537787  | 1.000      |
| 592 GOBP-REGULATION-OF-IMMUNE-SYSTEM-PROCESS          | GO-0002682    | 21   | -0.365909 | -1.321638 | 0.125000  | 0.535601  | 1.000      |
| 593 GOBP-NEGATIVE-REGULATION-OF-TRANSMEMBRANE-TRAN... | GO-0034763    | 6    | -0.542706 | -1.321895 | 0.167442  | 0.539277  | 1.000      |
| 594 GOBP-FC-EPSILON-RECEPTOR-SIGNALING-PATHWAY        | GO-0038095    | 7    | -0.501189 | -1.323492 | 0.166292  | 0.539976  | 1.000      |
| 595 GOBP-CYTOSKELETON-ORGANIZATION                    | GO-0007010    | 11   | -0.439665 | -1.324858 | 0.141026  | 0.541338  | 1.000      |
| 596 GOBP-REGULATION-OF-MUSCLE-SYSTEM-PROCESS          | GO-0090257    | 8    | -0.494203 | -1.333279 | 0.138952  | 0.527858  | 1.000      |
| 597 GOBP-REGULATION-OF-LEUKOCYTE-DIFFERENTIATION      | GO-1902105    | 9    | -0.476719 | -1.334808 | 0.128395  | 0.528801  | 1.000      |
| 598 GOBP-REGULATION-OF-PROTEIN-SERINE-THREONINE-KI... | GO-0071900    | 12   | -0.434254 | -1.340059 | 0.167920  | 0.521623  | 1.000      |
| 599 GOBP-APOPTOTIC-PROCESS                            | GO-0006915    | 35   | -0.334089 | -1.342518 | 0.105943  | 0.520980  | 1.000      |

Continuation of Table S11

| NAME | ID                                                 | SIZE | ES        | NES       | NOM.p.val | FDR.q.val | FWER.p.val |
|------|----------------------------------------------------|------|-----------|-----------|-----------|-----------|------------|
| 600  | GOBP-REGULATION-OF-PEPTIDYL-TYROSINE-PHOSPHORY...  | 9    | -0.465386 | -1.343222 | 0.150562  | 0.523966  | 1.000      |
| 601  | GOBP-POSITIVE-REGULATION-OF-PEPTIDYL-TYROSINE...   | 8    | -0.499029 | -1.350519 | 0.127359  | 0.513184  | 1.000      |
| 602  | GOBP-TRANSMEMBRANE-RECEPTOR-PROTEIN-TYROSINE-K...  | 19   | -0.375799 | -1.353577 | 0.101990  | 0.511299  | 1.000      |
| 603  | GOBP-EMBRYO-DEVELOPMENT                            | 14   | -0.416274 | -1.356255 | 0.103704  | 0.510021  | 1.000      |
| 604  | GOBP-NEGATIVE-REGULATION-OF-NUCLEOBASE-CONTAIN...  | 13   | -0.427517 | -1.357015 | 0.127359  | 0.512921  | 1.000      |
| 605  | GOBP-POSITIVE-REGULATION-OF-PROTEIN-PHOSPHORYL...  | 23   | -0.370149 | -1.362873 | 0.109865  | 0.505537  | 1.000      |
| 606  | REACTOME-G-ALPHA-Z-SIGNALING-EVENTS                | 5    | -0.601370 | -1.364935 | 0.161702  | 0.505954  | 1.000      |
| 607  | GOBP-CELLULAR-RESPONSE-TO-CADMIUM-ION              | 5    | -0.614021 | -1.365182 | 0.140426  | 0.509935  | 1.000      |
| 608  | GOBP-MAPK-CASCADE                                  | 18   | -0.404724 | -1.384270 | 0.081081  | 0.475607  | 1.000      |
| 609  | GOBP-LEUKOCYTE-MIGRATION                           | 6    | -0.572415 | -1.386692 | 0.127962  | 0.475008  | 1.000      |
| 610  | GOBP-REGULATION-OF-OSTEOCLAST-DIFFERENTIATION      | 5    | -0.608122 | -1.388514 | 0.128261  | 0.475292  | 1.000      |
| 611  | GOBP-POSITIVE-REGULATION-OF-PROTEIN-MODIFICATI...  | 23   | -0.370149 | -1.397436 | 0.086634  | 0.460417  | 1.000      |
| 612  | GOBP-REGULATION-OF-MYELOID-LEUKOCYTE-DIFFERENT...  | 8    | -0.510990 | -1.401103 | 0.126728  | 0.457852  | 1.000      |
| 613  | GOBP-REGULATION-OF-PHOSPHOLIPASE-C-ACTIVITY        | 5    | -0.626951 | -1.403147 | 0.131519  | 0.458186  | 1.000      |
| 614  | GOBP-POSITIVE-REGULATION-OF-PHOSPHORUS-METABOL...  | 24   | -0.364279 | -1.406203 | 0.084788  | 0.450868  | 1.000      |
| 615  | GOBP-REGULATION-OF-EPITHELIAL-CELL-MIGRATION       | 6    | -0.572718 | -1.408643 | 0.116331  | 0.456568  | 1.000      |
| 616  | GOBP-POSITIVE-REGULATION-OF-MYELOID-CELL-DIFFE...  | 7    | -0.538151 | -1.415053 | 0.110619  | 0.447727  | 1.000      |
| 617  | GOBP-LEUKOCYTE-CELL-CELL-ADHESION                  | 6    | -0.573299 | -1.416138 | 0.113379  | 0.450191  | 1.000      |
| 618  | GOBP-OSTEOCLAST-DIFFERENTIATION                    | 6    | -0.585457 | -1.417361 | 0.113586  | 0.452130  | 1.000      |
| 619  | GOBP-POSITIVE-REGULATION-OF-LIPASE-ACTIVITY        | 5    | -0.626951 | -1.419689 | 0.127155  | 0.452289  | 1.000      |
| 620  | GOBP-POSITIVE-REGULATION-OF-5SMALL-MOLECULE-MET... | 5    | -0.617940 | -1.420272 | 0.114486  | 0.455667  | 1.000      |
| 621  | GOBP-COAGULATION                                   | 8    | -0.534606 | -1.420283 | 0.108040  | 0.460287  | 1.000      |
| 622  | GOBP-NEURON-APOPTOTIC-PROCESS                      | 12   | -0.461134 | -1.420525 | 0.109785  | 0.464664  | 1.000      |
| 623  | GOBP-APOPTOTIC-SIGNALING-PATHWAY                   | 15   | -0.434984 | -1.425114 | 0.079646  | 0.459807  | 1.000      |
| 624  | GOBP-PROTEIN-KINASE-B-SIGNALING                    | 6    | -0.567364 | -1.428146 | 0.106335  | 0.458683  | 1.000      |
| 625  | GOBP-POSITIVE-REGULATION-OF-ANION-TRANSPORT        | 9    | -0.504673 | -1.431539 | 0.097950  | 0.456758  | 1.000      |
| 626  | GOBP-LOCOMOTION                                    | 31   | -0.364744 | -1.435691 | 0.061008  | 0.453196  | 1.000      |
| 627  | GOBP-OSTEOBLAST-DIFFERENTIATION                    | 5    | -0.629492 | -1.436988 | 0.116173  | 0.455562  | 1.000      |
| 628  | GOBP-REGULATION-OF-BODY-FLUID-LEVELS               | 11   | -0.465844 | -1.438244 | 0.087379  | 0.458236  | 1.000      |
| 629  | GOBP-REGULATION-OF-MITOTIC-CELL-CYCLE              | 5    | -0.645340 | -1.441063 | 0.101053  | 0.457130  | 1.000      |
| 630  | GOBP-POSITIVE-REGULATION-OF-CELLULAR-COMPONENT...  | 9    | -0.514756 | -1.443105 | 0.077626  | 0.458254  | 1.000      |
| 631  | GOBP-REGULATION-OF-GTPASE-ACTIVITY                 | 5    | -0.628153 | -1.443191 | 0.097674  | 0.463328  | 1.000      |
| 632  | GOBP-RESPONSE-TO-WOUNDING                          | 15   | -0.440615 | -1.444487 | 0.067757  | 0.465771  | 1.000      |
| 633  | GOBP-REGULATION-OF-DEFENSE-RESPONSE                | 7    | -0.568663 | -1.444987 | 0.095794  | 0.470247  | 1.000      |
| 634  | GOBP-ACTIVATION-OF-PROTEIN-KINASE-ACTIVITY         | 11   | -0.482024 | -1.446256 | 0.067470  | 0.473086  | 1.000      |
| 635  | GOBP-PLATELET-ACTIVATION                           | 6    | -0.597364 | -1.448538 | 0.106195  | 0.474467  | 1.000      |
| 636  | GOBP-REGULATION-OF-PROTEIN-MODIFICATION-PROCESS    | 29   | -0.370814 | -1.459878 | 0.048593  | 0.457843  | 1.000      |
| 637  | GOBP-REGULATION-OF-PROTEIN-STABILITY               | 5    | -0.640537 | -1.460026 | 0.084862  | 0.463138  | 1.000      |
| 638  | GOBP-POSITIVE-REGULATION-OF-CELL-CELL-ADHESION     | 5    | -0.647452 | -1.462526 | 0.084112  | 0.463652  | 1.000      |
| 639  | GOBP-REGULATION-OF-CELL-DIFFERENTIATION            | 36   | -0.360082 | -1.470044 | 0.034392  | 0.453617  | 1.000      |
| 640  | GOBP-REGULATION-OF-INFLAMMATORY-RESPONSE           | 7    | -0.568653 | -1.471006 | 0.085253  | 0.457322  | 1.000      |
| 641  | GOBP-NEGATIVE-REGULATION-OF-ION-TRANSPORT          | 11   | -0.486188 | -1.479829 | 0.064815  | 0.445835  | 1.000      |
| 642  | GOBP-REGULATION-OF-PEPTIDE-HORMONE-SECRETION       | 6    | -0.620792 | -1.481370 | 0.068966  | 0.448876  | 1.000      |

Continuation of Table S11

|     | NAME                                              | ID            | SIZE | ES        | NES       | NOM.p.val | FDR.q.val | FWER.p.val |
|-----|---------------------------------------------------|---------------|------|-----------|-----------|-----------|-----------|------------|
| 643 | GOBP-NEUROINFLAMMATORY_RESPONSE                   | GO-0150076    | 5    | -0.641995 | -1.484543 | 0.082005  | 0.448162  | 1.000      |
| 644 | GOBP-IMMUNE-SYSTEM-DEVELOPMENT                    | GO-0002520    | 17   | -0.422402 | -1.487282 | 0.060976  | 0.448288  | 1.000      |
| 645 | GOBP-REGULATION-OF-PEPTIDYL-SERINE-PHOSPHORYLA... | GO-00033135   | 8    | -0.560988 | -1.488460 | 0.073563  | 0.451582  | 1.000      |
| 646 | GOBP-POSITIVE-REGULATION-OF-LEUKOCYTE-CELL-CEL... | GO-1903039    | 5    | -0.647452 | -1.489033 | 0.082774  | 0.456418  | 1.000      |
| 647 | GOBP-POSITIVE-REGULATION-OF-PEPTIDYL-SERINE-PH... | GO-00033138   | 8    | -0.560988 | -1.494309 | 0.075472  | 0.451005  | 1.000      |
| 648 | REACTOME-HEMOSTASIS                               | R-RNO-109582  | 14   | -0.457796 | -1.498634 | 0.060533  | 0.447438  | 1.000      |
| 649 | GOBP-CELLULAR-RESPONSE-TO-DNA-DAMAGE-STIMULUS     | GO-0006974    | 5    | -0.664264 | -1.505843 | 0.080610  | 0.438424  | 1.000      |
| 650 | GOBP-REGULATION-OF-CELL-ACTIVATION                | GO-0050865    | 8    | -0.564424 | -1.507741 | 0.047414  | 0.440705  | 1.000      |
| 651 | GOBP-MYOTUBE-DIFFERENTIATION                      | GO-0014902    | 5    | -0.674591 | -1.509458 | 0.080000  | 0.443495  | 1.000      |
| 652 | GOBP-CELL-ACTIVATION                              | GO-0001775    | 21   | -0.421811 | -1.513681 | 0.058974  | 0.440404  | 1.000      |
| 653 | GOBP-EPITHELIAL-CELL-PROLIFERATION                | GO-0050673    | 12   | -0.492856 | -1.515965 | 0.059102  | 0.442164  | 1.000      |
| 654 | GOBP-AMYLOID-BETA-METABOLIC-PROCESS               | GO-0050435    | 5    | -0.682707 | -1.525907 | 0.059671  | 0.427671  | 1.000      |
| 655 | GOBP-NEGATIVE-REGULATION-OF-DEVELOPMENTAL-PROCESS | GO-0051093    | 13   | -0.484403 | -1.528867 | 0.055556  | 0.428761  | 1.000      |
| 656 | GOBP-PEPTIDYL-AMINO-ACID-MODIFICATION             | GO-0018193    | 22   | -0.419766 | -1.532452 | 0.037879  | 0.427877  | 1.000      |
| 657 | GOBP-AMYLOID-LEUKOCYTE-DIFFERENTIATION            | GO-0002573    | 11   | -0.509890 | -1.541709 | 0.064516  | 0.416116  | 1.000      |
| 658 | GOBP-REGULATION-OF-CYTOSKELETON-ORGANIZATION      | GO-0051493    | 5    | -0.672583 | -1.548426 | 0.050439  | 0.407886  | 1.000      |
| 659 | GOBP-NEGATIVE-REGULATION-OF-CELL-DIFFERENTIATION  | GO-0044596    | 13   | -0.484403 | -1.548510 | 0.056931  | 0.414387  | 1.000      |
| 660 | GOBP-REGULATION-OF-MULTICELLULAR-ORGANISMAL-DE... | GO-2000026    | 31   | -0.394403 | -1.554820 | 0.025510  | 0.408844  | 1.000      |
| 661 | REACTOME-CELL-CYCLE-MITOTIC                       | R-RNO-69278   | 5    | -0.674765 | -1.559186 | 0.063781  | 0.406821  | 1.000      |
| 662 | GOBP-NEGATIVE-REGULATION-OF-CELL-DEVELOPMENT      | GO-0010721    | 6    | -0.633310 | -1.568572 | 0.052521  | 0.394476  | 1.000      |
| 663 | GOBP-AMYLOID-PRECURSOR-PROTEIN-CATABOLIC-PROCESS  | GO-0042987    | 5    | -0.682707 | -1.583778 | 0.075055  | 0.369826  | 1.000      |
| 664 | GOBP-POSITIVE-REGULATION-OF-HEMOPOIESIS           | GO-1903708    | 7    | -0.624195 | -1.589717 | 0.055046  | 0.364446  | 1.000      |
| 665 | GOBP-AMYLOID-PRECURSOR-PROTEIN-METABOLIC-PROCESS  | GO-0042982    | 5    | -0.682707 | -1.597760 | 0.054374  | 0.354896  | 1.000      |
| 666 | GOBP-POSITIVE-REGULATION-OF-RESPONSE-TO-EXTERN... | GO-0032103    | 9    | -0.571632 | -1.600836 | 0.042654  | 0.354805  | 1.000      |
| 667 | REACTOME-BETA-CATENIN-INDEPENDENT-WNT-SIGNALING   | R-RNO-3858494 | 5    | -0.713583 | -1.603333 | 0.046771  | 0.356887  | 1.000      |
| 668 | GOBP-REGULATION-OF-RESPONSE-TO-STRESS             | GO-0080134    | 19   | -0.460005 | -1.611166 | 0.035800  | 0.349061  | 1.000      |
| 669 | GOBP-NEURON-PROJECTION-GUIDANCE                   | GO-0097485    | 9    | -0.581613 | -1.625345 | 0.039352  | 0.329714  | 1.000      |
| 670 | GOBP-REGULATION-OF-PROTEIN-LOCALIZATION           | GO-0032880    | 18   | -0.472000 | -1.633561 | 0.041667  | 0.322134  | 1.000      |
| 671 | GOBP-CELL-POPULATION-PROLIFERATION                | GO-0008283    | 31   | -0.418403 | -1.641530 | 0.017032  | 0.313427  | 1.000      |
| 672 | GOBP-POSITIVE-REGULATION-OF-SMOOTH-MUSCLE-CELL... | GO-0048661    | 5    | -0.718896 | -1.641695 | 0.040632  | 0.319717  | 1.000      |
| 673 | GOBP-NEGATIVE-REGULATION-OF-APOPTOTIC-SIGNALIN... | GO-2001234    | 7    | -0.632371 | -1.644545 | 0.034169  | 0.320978  | 1.000      |
| 674 | GOBP-ESTABLISHMENT-OF-PROTEIN-LOCALIZATION-TO-... | GO-0072594    | 6    | -0.691121 | -1.649947 | 0.033860  | 0.319172  | 1.000      |
| 675 | GOBP-ERBB-SIGNALING-PATHWAY                       | GO-0038127    | 5    | -0.728548 | -1.656747 | 0.049661  | 0.313216  | 1.000      |
| 676 | GOBP-WOUND-HEALING                                | GO-0042060    | 13   | -0.519775 | -1.665462 | 0.019231  | 0.303139  | 1.000      |
| 677 | GOBP-REGULATION-OF-INTRACELLULAR-SIGNAL-TRANSD... | GO-1902531    | 21   | -0.463694 | -1.666739 | 0.011933  | 0.308253  | 1.000      |
| 678 | GOBP-POSITIVE-REGULATION-OF-MYELOID-LEUKOCYTE-... | GO-0002763    | 6    | -0.675452 | -1.671388 | 0.030501  | 0.306890  | 1.000      |
| 679 | GOBP-RESPONSE-TO-GROWTH-FACTOR                    | GO-0070848    | 18   | -0.481308 | -1.681438 | 0.017370  | 0.294907  | 1.000      |
| 680 | GOBP-TAXIS                                        | GO-0042330    | 14   | -0.515160 | -1.683985 | 0.027335  | 0.298163  | 1.000      |
| 681 | GOBP-POSITIVE-REGULATION-OF-PHOSPHATIDYLINOSIT... | GO-0014068    | 5    | -0.749227 | -1.684059 | 0.026906  | 0.305932  | 1.000      |
| 682 | REACTOME-SIGNALING-BY-WNT                         | R-RNO-195721  | 7    | -0.643566 | -1.688209 | 0.029345  | 0.306713  | 1.000      |
| 683 | GOBP-INOSITOL-LIPID-MEDIATED-SIGNALING            | GO-0048017    | 8    | -0.614242 | -1.692759 | 0.026570  | 0.306614  | 1.000      |
| 684 | GOBP-REGULATION-OF-MAP-KINASE-ACTIVITY            | GO-0043405    | 9    | -0.616295 | -1.701887 | 0.013667  | 0.296605  | 0.999      |
| 685 | GOBP-REGULATION-OF-PEPTIDE-SECRETION              | GO-0002791    | 7    | -0.674308 | -1.708127 | 0.027842  | 0.292878  | 0.999      |

Continuation of Table S11

| NAME                                                  | ID            | SIZE | ES        | NES       | NOM.p.val | FDR.q.val | FWER.p.val |
|-------------------------------------------------------|---------------|------|-----------|-----------|-----------|-----------|------------|
| 686 GOBP-POSITIVE-REGULATION_OF_CELLULAR-PROTEIN_L... | GO-1903829    | 7    | -0.677764 | -1.721510 | 0.015625  | 0.278120  | 0.998      |
| 687 GOBP-ANATOMICAL-STRUCTURE-FORMATION-INVOLVED_I... | GO-0048646    | 20   | -0.481020 | -1.750632 | 0.009804  | 0.239676  | 0.994      |
| 688 GOBP-NEGATIVE-REGULATION-OF-CELL-DEATH            | GO-0060548    | 22   | -0.470940 | -1.752907 | 0.014286  | 0.243146  | 0.994      |
| 689 GOBP-POSITIVE-REGULATION-OF-INTRACELLULAR-SIGN... | GO-1902533    | 14   | -0.542037 | -1.759478 | 0.008791  | 0.240231  | 0.993      |
| 690 GOBP-REGULATION-OF-ORGANELLE-ORGANIZATION         | GO-0033043    | 14   | -0.564031 | -1.767300 | 0.006928  | 0.235417  | 0.991      |
| 691 GOBP-CELL-MIGRATION                               | GO-0016477    | 22   | -0.486011 | -1.784100 | 0.004975  | 0.218312  | 0.985      |
| 692 REACTOME-CELL-CYCLE                               | R-RNO-1640170 | 6    | -0.754056 | -1.798801 | 0.010438  | 0.203691  | 0.978      |
| 693 GOBP-PEPTIDYL-SERINE-MODIFICATION                 | GO-0018209    | 12   | -0.586349 | -1.806308 | 0.018561  | 0.200268  | 0.973      |
| 694 GOBP-NUCLEAR-TRANSPORT                            | GO-0051169    | 5    | -0.792643 | -1.824440 | 0.006608  | 0.180546  | 0.957      |
| 695 GOBP-SMOOTH-MUSCLE-CELL-PROLIFERATION             | GO-0048659    | 6    | -0.766386 | -1.824954 | 0.011338  | 0.187454  | 0.957      |
| 696 GOBP-REGULATION-OF-VASCULAR-ASSOCIATED-SMOOTH...  | GO-1904705    | 5    | -0.817806 | -1.829163 | 0.008529  | 0.188675  | 0.953      |
| 697 GOBP-REGULATION-OF-CELLULAR-COMPONENT-MOVEMENT    | GO-0051270    | 15   | -0.566820 | -1.834603 | 0.005076  | 0.189225  | 0.939      |
| 698 GOBP-POSITIVE-REGULATION-OF-CELLULAR-COMPONENT... | GO-0051130    | 24   | -0.493686 | -1.856780 | 0.004988  | 0.166144  | 0.911      |
| 699 GOBP-POSITIVE-REGULATION-OF-PROTEIN-SERINE-THR... | GO-0071902    | 9    | -0.664176 | -1.886095 | 0.004762  | 0.138093  | 0.852      |
| 700 GOBP-REGULATION-OF-CELL-ADHESION                  | GO-0030155    | 13   | -0.598240 | -1.886961 | 0.014151  | 0.144055  | 0.851      |
| 701 GOBP-ERK1-AND-ERK2-CASCADE                        | GO-0070371    | 5    | -0.841075 | -1.891822 | 0.004338  | 0.145961  | 0.836      |
| 702 REACTOME-PLATELET-ACTIVATION-SIGNALING-AND-AGG... | R-HSA-76002   | 7    | -0.725904 | -1.901326 | 0.004484  | 0.141143  | 0.815      |
| 703 GOBP-PHOSPHATIDYLINOSITOL-3-KINASE-SIGNALING      | GO-0014065    | 7    | -0.745647 | -1.911279 | 0.006849  | 0.137642  | 0.777      |
| 704 GOBP-POSITIVE-REGULATION-OF-ESTABLISHMENT-OF-P... | GO-1904951    | 5    | -0.856813 | -1.935586 | 0.004535  | 0.116525  | 0.692      |
| 705 GOBP-REGULATION-OF-MAPK-CASCADE                   | GO-0043408    | 13   | -0.609137 | -1.948559 | 0.002481  | 0.111934  | 0.650      |
| 706 GOBP-REGULATION-OF-PHOSPHATIDYLINOSITOL-3-KINA... | GO-0014066    | 6    | -0.783878 | -1.963295 | 0.004237  | 0.102936  | 0.599      |
| 707 GOBP-POSITIVE-REGULATION-OF-CELL-ADHESION         | GO-0045785    | 7    | -0.752015 | -1.973063 | 0.004695  | 0.101850  | 0.566      |
| 708 GOBP-POSITIVE-REGULATION-OF-CELL-POPULATION-PR... | GO-0008284    | 21   | -0.557474 | -2.015513 | 0.000000  | 0.074913  | 0.441      |
| 709 GOBP-ACTIVATION-OF-MAPK-ACTIVITY                  | GO-0000187    | 6    | -0.838398 | -2.018368 | 0.000000  | 0.080351  | 0.431      |
| 710 GOBP-REGULATION-OF-CELL-CELL-ADHESION             | GO-0022407    | 9    | -0.756126 | -2.065082 | 0.004202  | 0.055305  | 0.294      |
| 711 GOBP-POSITIVE-REGULATION-OF-LOCOMOTION            | GO-0040017    | 11   | -0.707142 | -2.087959 | 0.000000  | 0.049878  | 0.249      |
| 712 GOBP-POSITIVE-REGULATION-OF-MAP-KINASE-ACTIVITY   | GO-0043406    | 6    | -0.838398 | -2.089277 | 0.000000  | 0.056779  | 0.248      |
| 713 GOBP-OSSIFICATION                                 | GO-0001503    | 9    | -0.771636 | -2.111545 | 0.000000  | 0.050400  | 0.192      |
| 714 GOBP-POSITIVE-REGULATION-OF-MAPK-CASCADE          | GO-0043410    | 9    | -0.768611 | -2.153635 | 0.000000  | 0.039986  | 0.130      |
| 715 GOBP-POSITIVE-REGULATION-OF-ORGANELLE-ORGANIZA... | GO-0010638    | 10   | -0.747409 | -2.157120 | 0.002299  | 0.047046  | 0.122      |
| 716 GOBP-REGULATION-OF-PEPTIDE-TRANSPORT              | GO-0090087    | 10   | -0.738994 | -2.159328 | 0.000000  | 0.060828  | 0.118      |
| 717 GOBP-MUSCLE-CELL-PROLIFERATION                    | GO-0033002    | 8    | -0.792860 | -2.163419 | 0.000000  | 0.089101  | 0.115      |
| 718 GOBP-REGULATION-OF-RESPONSE-TO-EXTERNAL-STIMULUS  | GO-0032101    | 15   | -0.686656 | -2.283672 | 0.000000  | 0.037286  | 0.025      |

End of Table

Supplementary Table S12: CTX-M early profile (8 DPL peak) GSEA results.

| Begin of Table S12 |                                                    |               |      |          |          |           |           |            |  |
|--------------------|----------------------------------------------------|---------------|------|----------|----------|-----------|-----------|------------|--|
|                    | NAME                                               | ID            | SIZE | ES       | NES      | NOM.p.val | FDR.q.val | FWER.p.val |  |
| 0                  | REACTOME_UNBLOCKING_OF_NMDA_RECEPTORS_GUTAMAT...   | R-RNO-438066  | 12   | 0.599549 | 1.767262 | 0.007737  | 1.000000  | 0.986      |  |
| 1                  | REACTOME_NEURONAL_SYSTEM                           | R-RNO-112316  | 26   | 0.481141 | 1.766692 | 0.009091  | 1.000000  | 0.987      |  |
| 2                  | REACTOME_TRANSMISSION_ACROSS_CHEMICAL_SYNAPSES     | R-RNO-112315  | 23   | 0.489211 | 1.753888 | 0.005576  | 1.000000  | 0.992      |  |
| 3                  | GOBP_G_PROTEIN_COUPLED_RECEPTOR_SIGNALING_PATHWAY  | GO-0007186    | 18   | 0.520962 | 1.715385 | 0.024299  | 1.000000  | 0.998      |  |
| 4                  | REACTOME_POST_TRANSLATIONAL_PROTEIN_MODIFICATION   | R-RNO-597592  | 7    | 0.670988 | 1.667953 | 0.015625  | 1.000000  | 1.000      |  |
| 5                  | GOBP_PROTEIN_LOCALIZATION_TO_CELL_PERIPHERY        | GO-1990778    | 12   | 0.571855 | 1.664676 | 0.019891  | 1.000000  | 1.000      |  |
| 6                  | REACTOME_NEGATIVE_REGULATION_OF_NMDA_RECEPTOR....  | R-HSA-961732  | 8    | 0.625000 | 1.654605 | 0.025180  | 1.000000  | 1.000      |  |
| 7                  | REACTOME_NEUROTRANSMITTER_RECEPTORS_AND_POSTSY...  | R-RNO-112314  | 22   | 0.467556 | 1.650605 | 0.016981  | 1.000000  | 1.000      |  |
| 8                  | GOBP_CELLULAR_RESPONSE_TO_ALCOHOL                  | GO-0097306    | 5    | 0.733359 | 1.646519 | 0.015534  | 0.958915  | 1.000      |  |
| 9                  | REACTOME_ASSEMBLY_AND_CELL_SURFACE_PRESENTATIO...  | R-RNO-9609736 | 8    | 0.625000 | 1.639665 | 0.036663  | 0.921557  | 1.000      |  |
| 10                 | REACTOME_ACTIVATION_OF_NMDA_RECEPTORS_AND_POST...  | R-RNO-442755  | 16   | 0.499603 | 1.635245 | 0.039106  | 0.850281  | 1.000      |  |
| 11                 | GOBP_PROTEIN_LOCALIZATION_TO_CELL_JUNCTION         | GO-1902414    | 6    | 0.682927 | 1.614915 | 0.025145  | 0.895684  | 1.000      |  |
| 12                 | GOBP_CELLULAR_RESPONSE_TO_KETONE                   | GO-1901655    | 5    | 0.746988 | 1.600881 | 0.037951  | 0.904788  | 1.000      |  |
| 13                 | GOBP_GLUTAMATE_RECEPTOR_SIGNALING_PATHWAY          | GO-0007215    | 17   | 0.479191 | 1.584430 | 0.038610  | 0.931415  | 1.000      |  |
| 14                 | REACTOME_LONG_TERM_POTENTIATION                    | R-HSA-9620244 | 10   | 0.565748 | 1.570278 | 0.047714  | 0.945878  | 1.000      |  |
| 15                 | GOBP_ADENYLATE_CYCLASE_INHIBITING_G_PROTEIN.CO...  | GO-0007193    | 9    | 0.566426 | 1.544682 | 0.062147  | 1.000000  | 1.000      |  |
| 16                 | GOBP_PROTEIN_LOCALIZATION_TO_MEMBRANE              | GO-00072657   | 14   | 0.497549 | 1.540480 | 0.049702  | 0.995066  | 1.000      |  |
| 17                 | REACTOME_SYNAPTIC_ADHESION_LIKE_MOLECULES          | R-RNO-8849932 | 9    | 0.558248 | 1.538382 | 0.062030  | 0.951029  | 1.000      |  |
| 18                 | GOBP_ORGANIC_HYDROXY_COMPOUND_TRANSPORT            | GO-0015850    | 6    | 0.649641 | 1.522391 | 0.077821  | 0.990228  | 1.000      |  |
| 19                 | HALLMARK_P13K_AKT_MTOR_SIGNALING                   | M5923         | 6    | 0.638770 | 1.513777 | 0.073705  | 0.987905  | 1.000      |  |
| 20                 | GOBP_POSITIVE_REGULATION_OF_CELL_DEATH             | GO-0010942    | 19   | 0.447558 | 1.512260 | 0.047348  | 0.948185  | 1.000      |  |
| 21                 | GOBP_REGULATION_OF_NMDA_RECEPTOR_ACTIVITY          | GO-2000310    | 10   | 0.531271 | 1.505432 | 0.068053  | 0.940561  | 1.000      |  |
| 22                 | GOBP_POSITIVE_REGULATION_OF_IMMUNE_RESPONSE        | GO-0050778    | 9    | 0.554897 | 1.502780 | 0.056075  | 0.912790  | 1.000      |  |
| 23                 | GOBP_PROTEIN_LOCALIZATION_TO_POSTSYNAPSE           | GO-0062237    | 5    | 0.674699 | 1.501587 | 0.059730  | 0.880402  | 1.000      |  |
| 24                 | GOBP_PROTEIN_LOCALIZATION_TO_SYNAPSE               | GO-0035418    | 5    | 0.674699 | 1.493818 | 0.069388  | 0.881773  | 1.000      |  |
| 25                 | GOBP_IONOTROPIC_GLUTAMATE_RECEPTOR_SIGNALING_P...  | GO-0035235    | 9    | 0.556379 | 1.486816 | 0.063116  | 0.882940  | 1.000      |  |
| 26                 | GOBP_SMALL_MOLECULE_METABOLIC_PROCESS              | GO-0044281    | 15   | 0.450474 | 1.467918 | 0.072937  | 0.938840  | 1.000      |  |
| 27                 | REACTOME_PROTEIN_PROTEIN_INTERACTIONS_AT_SYNAPSES  | R-RNO-6794362 | 12   | 0.501960 | 1.467711 | 0.062264  | 0.906280  | 1.000      |  |
| 28                 | GOBP_CARBOHYDRATE_METABOLIC_PROCESS                | GO-0005975    | 9    | 0.526143 | 1.443969 | 0.098456  | 0.987862  | 1.000      |  |
| 29                 | GOBP_CELL_SURFACE_RECEPTOR_SIGNALING_PATHWAY_I...  | GO-1905114    | 15   | 0.466804 | 1.443516 | 0.077799  | 0.957145  | 1.000      |  |
| 30                 | REACTOME_RAS_ACTIVATION_UPON_CA2_INFLUX_THROUGH... | R-HSA-442982  | 6    | 0.609756 | 1.441100 | 0.103448  | 0.937064  | 1.000      |  |
| 31                 | GOBP_ACTIVATION_OF_IMMUNE_RESPONSE                 | GO-0002253    | 5    | 0.649649 | 1.440250 | 0.108499  | 0.911991  | 1.000      |  |
| 32                 | GOBP_MAINTENANCE_OF_LOCATION                       | GO-0051235    | 7    | 0.572121 | 1.417574 | 0.095506  | 0.989674  | 1.000      |  |
| 33                 | REACTOME_LEISHMANIA_INFECTION                      | R-HSA-9658195 | 10   | 0.500275 | 1.416263 | 0.096045  | 0.966601  | 1.000      |  |
| 34                 | GOBP_REGULATION_OF_POSTSYNAPTIC_MEMBRANE_POTEN...  | GO-0060078    | 14   | 0.442009 | 1.402884 | 0.098113  | 1.000000  | 1.000      |  |
| 35                 | GOBP_IMMUNE_EFFECTOR_PROCESS                       | GO-0002252    | 10   | 0.497732 | 1.398479 | 0.105364  | 0.996011  | 1.000      |  |
| 36                 | REACTOME_ANTIINFLAMMATORY_RESPONSE_FAVOURING...    | R-HSA-9662851 | 5    | 0.622568 | 1.393101 | 0.127953  | 0.993792  | 1.000      |  |
| 37                 | GOBP_VESICLE_MEDIATED_TRANSPORT_IN_SYNAPSE         | GO-0099003    | 7    | 0.555577 | 1.391908 | 0.122000  | 0.973296  | 1.000      |  |
| 38                 | GOBP_NEGATIVE_REGULATION_OF_MOLECULAR_FUNCTION     | GO-0044092    | 24   | 0.392892 | 1.389408 | 0.087657  | 0.959330  | 1.000      |  |
| 39                 | GOBP_CATION_TRANSPORT                              | GO-0006812    | 25   | 0.385385 | 1.387241 | 0.103774  | 0.944523  | 1.000      |  |
| 40                 | REACTOME_CIRCADIAN_CLOCK                           | R-HSA-400253  | 5    | 0.618496 | 1.386783 | 0.122841  | 0.923209  | 1.000      |  |

Continuation of Table S12

|    | NAME                                              | ID            | SIZE | ES       | NES      | NOM.p.val | FDR.q.val | FWER.p.val |
|----|---------------------------------------------------|---------------|------|----------|----------|-----------|-----------|------------|
| 41 | GOBP-POSTSYNAPSE.ORGANIZATION                     | GO-0009173    | 10   | 0.480596 | 1.386317 | 0.124521  | 0.903493  | 1.000      |
| 42 | GOBP-PROTEOLYSIS                                  | GO-0006508    | 17   | 0.424658 | 1.385751 | 0.112132  | 0.885159  | 1.000      |
| 43 | GOBP-RESPONSE.TO.ALCOHOL                          | GO-00097305   | 11   | 0.471336 | 1.369583 | 0.119565  | 0.930747  | 1.000      |
| 44 | GOBP-SEXUAL.REPRODUCTION                          | GO-0019953    | 10   | 0.483559 | 1.369220 | 0.130515  | 0.911607  | 1.000      |
| 45 | GOBP-CELLULAR.RESPONSE.TO.PEPTIDE.HORMONE.STIM... | GO-0071375    | 9    | 0.505884 | 1.362149 | 0.110887  | 0.920825  | 1.000      |
| 46 | REACTOME-NEUREXINS.AND-NEUROLIGINS                | R-RNO-6794361 | 9    | 0.503978 | 1.360998 | 0.122807  | 0.905795  | 1.000      |
| 47 | REACTOME-INFECTIOUS.DISEASE                       | R-HSA-5663205 | 13   | 0.441916 | 1.359202 | 0.113949  | 0.894054  | 1.000      |
| 48 | GOBP-CIRCADIAN.REGULATION.OF.GENE.EXPRESSION      | GO-0032922    | 5    | 0.609411 | 1.353397 | 0.164284  | 0.890780  | 1.000      |
| 49 | GOBP-MEMBRANE.PROTEIN.PROTEOLYSIS                 | GO-0033619    | 6    | 0.570490 | 1.342228 | 0.120459  | 0.924599  | 1.000      |
| 50 | GOBP-REGULATION.OF.CARBOHYDRATE.METABOLIC.PROCESS | GO-0006109    | 5    | 0.600490 | 1.338495 | 0.163306  | 0.920831  | 1.000      |
| 51 | GOBP-REGULATION.OF.CARBOHYDRATE.BIOSYNTHETIC.P... | GO-00043255   | 5    | 0.600490 | 1.328573 | 0.166667  | 0.941821  | 1.000      |
| 52 | GOBP-CELLULAR.COMPONENT.MAINTENANCE               | GO-00043954   | 5    | 0.581473 | 1.328249 | 0.156701  | 0.925489  | 1.000      |
| 53 | GOBP-INORGANIC.ION.TRANSMEMBRANE.TRANSPORT        | GO-0009860    | 9    | 0.490646 | 1.328124 | 0.153696  | 0.908666  | 1.000      |
| 54 | GOBP-CARBOHYDRATE.BIOSYNTHETIC.PROCESS            | GO-0016051    | 5    | 0.600490 | 1.324532 | 0.180233  | 0.905341  | 1.000      |
| 55 | GOBP-EXCITATORY.CHEMICAL.SYNAPTIC.TRANSMISSION    | GO-0009876    | 5    | 0.602410 | 1.319737 | 0.164329  | 0.907662  | 1.000      |
| 56 | GOBP-RESPONSE.TO.DRUG                             | GO-00042493   | 11   | 0.457964 | 1.316027 | 0.160517  | 0.905523  | 1.000      |
| 57 | GOBP-ORGANIC.HYDROXY.COMPOUND.METABOLIC.PROCESS   | GO-1901615    | 7    | 0.534261 | 1.314287 | 0.156190  | 0.896015  | 1.000      |
| 58 | GOBP-PROTEIN.LOCALIZATION.TO.PLASMA.MEMBRANE      | GO-0072659    | 7    | 0.530609 | 1.302524 | 0.169524  | 0.925840  | 1.000      |
| 59 | REACTOME-INNATE.IMMUNE.SYSTEM                     | R-RNO-108249  | 16   | 0.397738 | 1.291572 | 0.165049  | 0.951549  | 1.000      |
| 60 | GOBP-EXOCYTOSIS                                   | GO-0006887    | 11   | 0.447674 | 1.290058 | 0.160305  | 0.941658  | 1.000      |
| 61 | GOBP-CELL-ACTIVATION.INVOLVED.IN.IMMUNE.RESPONSE  | GO-0002263    | 6    | 0.534412 | 1.287372 | 0.186992  | 0.935826  | 1.000      |
| 62 | GOBP-CELL-CELL-SIGNALING.BY.WNT                   | GO-0198738    | 7    | 0.504783 | 1.282608 | 0.186792  | 0.938801  | 1.000      |
| 63 | GOBP-MYELOID-LEUKOCYTE-MEDIATED-IMMUNITY          | GO-0002444    | 6    | 0.534412 | 1.273605 | 0.201887  | 0.958142  | 1.000      |
| 64 | GOBP-REGULATION.OF.ION.TRANSPORT                  | GO-0043269    | 36   | 0.332705 | 1.270922 | 0.154696  | 0.952589  | 1.000      |
| 65 | REACTOME-EPHLEPHRIN.SIGNALING                     | R-RNO-2682334 | 6    | 0.536661 | 1.269958 | 0.219608  | 0.941435  | 1.000      |
| 66 | GOBP-REGULATION.OF.WNT.SIGNALING.PATHWAY          | GO-0030111    | 5    | 0.579201 | 1.267367 | 0.201550  | 0.936521  | 1.000      |
| 67 | GOBP-MALE.GAMETE.GENERATION                       | GO-0048232    | 5    | 0.582629 | 1.258748 | 0.227898  | 0.954460  | 1.000      |
| 68 | GOBP-CATION.TRANSMEMBRANE.TRANSPORT               | GO-00098655   | 18   | 0.375694 | 1.251294 | 0.176692  | 0.967766  | 1.000      |
| 69 | REACTOME-NEUTROPHIL-DEGRANULATION                 | R-RNO-6798695 | 6    | 0.534412 | 1.247381 | 0.210821  | 0.967722  | 1.000      |
| 70 | GOBP-NEGATIVE.REGULATION.OF.KINASE.ACTIVITY       | GO-0033673    | 5    | 0.556317 | 1.243092 | 0.215190  | 0.970109  | 1.000      |
| 71 | GOBP-RESPONSE.TO.KETONE                           | GO-1901654    | 7    | 0.495849 | 1.23282  | 0.204771  | 0.981859  | 1.000      |
| 72 | GOBP-CARBOHYDRATE.DERIVATIVE.METABOLIC.PROCESS    | GO-1901135    | 7    | 0.491393 | 1.234215 | 0.220561  | 0.976181  | 1.000      |
| 73 | GOBP-POSITIVE.REGULATION.OF.APOPTOTIC.SIGNALIN... | GO-2001235    | 5    | 0.552899 | 1.227370 | 0.229167  | 0.987272  | 1.000      |
| 74 | GOBP-NEGATIVE.REGULATION.OF.TRANSFERASE.ACTIVITY  | GO-0051348    | 5    | 0.556317 | 1.225645 | 0.258189  | 0.980182  | 1.000      |
| 75 | GOBP-DIVALENT.INORGANIC.CATION.HOMEOSTASIS        | GO-0072507    | 13   | 0.396348 | 1.221757 | 0.223529  | 0.980908  | 1.000      |
| 76 | GOBP-CELLULAR.RESPONSE.TO.PEPTIDE                 | GO-1901653    | 13   | 0.402694 | 1.221236 | 0.214552  | 0.969922  | 1.000      |
| 77 | GOBP-METAL-ION.HOMEOSTASIS                        | GO-0055065    | 14   | 0.382044 | 1.217116 | 0.217472  | 0.972269  | 1.000      |
| 78 | GOBP-REGULATION.OF.CYTOSOLIC.CALCIUM-ION.CONCE... | GO-0051480    | 13   | 0.396348 | 1.215116 | 0.209016  | 0.966724  | 1.000      |
| 79 | REACTOME-SIGNALING.BY.GPCR                        | R-RNO-372790  | 22   | 0.344419 | 1.212778 | 0.212406  | 0.963190  | 1.000      |
| 80 | GOBP-RESPONSE.TO.ETHANOL                          | GO-0045471    | 5    | 0.560562 | 1.212334 | 0.248555  | 0.952796  | 1.000      |
| 81 | REACTOME-DAG-AND-IP3-SIGNALING                    | R-RNO-1489509 | 8    | 0.460017 | 1.202414 | 0.219282  | 0.974958  | 1.000      |
| 82 | REACTOME-TRAFFICKING.OF-AMPA-RECEPTORS            | R-RNO-399719  | 11   | 0.412893 | 1.198867 | 0.248148  | 0.975097  | 1.000      |
| 83 | GOBP-GAMETE.GENERATION                            | GO-0007276    | 9    | 0.437644 | 1.198554 | 0.227687  | 0.964709  | 1.000      |

Continuation of Table S12

| NAME | ID                                                | SIZE | ES       | NES      | NOM.p.val | FDR.q.val | FWER.p.val |
|------|---------------------------------------------------|------|----------|----------|-----------|-----------|------------|
| 84   | GOBP-REGULATION-OF-PROTEIN-BINDING                | 7    | 0.467713 | 1.197843 | 0.249035  | 0.955764  | 1.000      |
| 85   | GOBP-CELLULAR-RESPONSE-TO-HORMONE-STIMULUS        | 11   | 0.414508 | 1.194315 | 0.250454  | 0.956450  | 1.000      |
| 86   | GOBP-ADENYLATE-CYCLASE-MODULATING-G-PROTEIN.CO... | 11   | 0.404822 | 1.188431 | 0.258964  | 0.964689  | 1.000      |
| 87   | GOBP-CELL-GROWTH                                  | 10   | 0.418957 | 1.187323 | 0.243446  | 0.957192  | 1.000      |
| 88   | GOBP-RESPONSE-TO-PEPTIDE-HORMONE                  | 13   | 0.382065 | 1.179166 | 0.258491  | 0.972906  | 1.000      |
| 89   | GOBP-POLYSACCHARIDE-METABOLIC-PROCESS             | 5    | 0.538759 | 1.174383 | 0.302804  | 0.977399  | 1.000      |
| 90   | GOBP-GENERATION-OF-PRECURSOR-METABOLITES-AND-E... | 5    | 0.531151 | 1.174191 | 0.261364  | 0.967326  | 1.000      |
| 91   | GOBP-REGULATION-OF-TRANSPORT                      | 44   | 0.297782 | 1.173940 | 0.246454  | 0.957650  | 1.000      |
| 92   | GOBP-RESPONSE-TO-TUMOR-NECROSIS-FACTOR            | 7    | 0.468438 | 1.170961 | 0.264325  | 0.956953  | 1.000      |
| 93   | REACTOME-ONCOGENIC-MAPK-SIGNALING                 | 5    | 0.525484 | 1.167804 | 0.291913  | 0.957541  | 1.000      |
| 94   | REACTOME-TOLL-LIKE-RECEPTOR-CASCADES              | 8    | 0.443908 | 1.167086 | 0.257692  | 0.949763  | 1.000      |
| 95   | GOBP-NEUROTRANSMITTER-SECRETION                   | 6    | 0.495026 | 1.166082 | 0.257194  | 0.942995  | 1.000      |
| 96   | REACTOME-TOLL-LIKE-RECEPTOR-9-TLR9-CASCADE        | 8    | 0.443908 | 1.164425 | 0.264815  | 0.938456  | 1.000      |
| 97   | GOBP-ORGANONITROGEN-COMPOUND-BIOSYNTHETIC-PROCESS | 13   | 0.376284 | 1.155559 | 0.291045  | 0.957207  | 1.000      |
| 98   | REACTOME-MYD88-INDEPENDENT-TLR4-CASCADE           | 8    | 0.443908 | 1.152916 | 0.299228  | 0.955563  | 1.000      |
| 99   | GOBP-REGULATION-OF-IMMUNE-RESPONSE                | 12   | 0.388875 | 1.152083 | 0.285981  | 0.948296  | 1.000      |
| 100  | GOBP-HOMEOSTASIS-OF-NUMBER-OF-CELLS               | 5    | 0.516576 | 1.151661 | 0.297619  | 0.940228  | 1.000      |
| 101  | GOBP-REGULATION-OF-VASCULATURE-DEVELOPMENT        | 5    | 0.521127 | 1.145698 | 0.310277  | 0.949348  | 1.000      |
| 102  | GOBP-NEURON-DEVELOPMENT                           | 33   | 0.301410 | 1.144035 | 0.295956  | 0.945291  | 1.000      |
| 103  | GOBP-REGULATION-OF-CATION-TRANSMEMBRANE-TRANSPORT | 16   | 0.350693 | 1.137787 | 0.304991  | 0.955541  | 1.000      |
| 104  | REACTOME-TOLL-LIKE-RECEPTOR-TLR1-TLR2-CASCADE     | 8    | 0.443908 | 1.135608 | 0.312871  | 0.953069  | 1.000      |
| 105  | GOBP-CELL-PART-MORPHOGENESIS                      | 24   | 0.307266 | 1.121845 | 0.293333  | 0.987063  | 1.000      |
| 106  | GOBP-CHEMICAL-HOMEOSTASIS                         | 23   | 0.314824 | 1.120183 | 0.317739  | 0.982921  | 1.000      |
| 107  | GOBP-CHEMICAL-SYNAPTIC-TRANSMISSION-POSTSYNAPTIC  | 9    | 0.416186 | 1.117581 | 0.312500  | 0.981564  | 1.000      |
| 108  | GOBP-REGULATION-OF-CELL-CYCLE-PROCESS             | 5    | 0.504774 | 1.114742 | 0.315582  | 0.981262  | 1.000      |
| 109  | GOBP-CELLULAR-COMPOONENT-MORPHOGENESIS            | 24   | 0.307266 | 1.112686 | 0.300000  | 0.978967  | 1.000      |
| 110  | GOBP-CELL-MORPHOGENESIS                           | 24   | 0.307266 | 1.104890 | 0.308571  | 0.993441  | 1.000      |
| 111  | GOBP-POSITIVE-REGULATION-OF-PROTEOLYSIS           | 8    | 0.417302 | 1.100775 | 0.316479  | 0.997177  | 1.000      |
| 112  | GOBP-SENSORY-PERCEPTION                           | 9    | 0.409659 | 1.100690 | 0.343396  | 0.988610  | 1.000      |
| 113  | GOBP-AXON-DEVELOPMENT                             | 18   | 0.326472 | 1.100681 | 0.340909  | 0.980000  | 1.000      |
| 114  | REACTOME-ADAPTIVE-IMMUNE-SYSTEM                   | 9    | 0.409772 | 1.096708 | 0.345865  | 0.983661  | 1.000      |
| 115  | GOBP-REGULATION-OF-NEUROTRANSMITTER-RECEPTOR-A... | 13   | 0.353560 | 1.094960 | 0.312977  | 0.980572  | 1.000      |
| 116  | GOBP-ORGANOPHOSPHATE-METABOLIC-PROCESS            | 7    | 0.434539 | 1.090255 | 0.362173  | 0.985966  | 1.000      |
| 117  | GOBP-RESPONSE-TO-ORGANIC-CYCLIC-COMPOUND          | 20   | 0.314935 | 1.089081 | 0.324428  | 0.981338  | 1.000      |
| 118  | GOBP-REGULATION-OF-CELLULAR-COMPOONENT-SIZE       | 7    | 0.435292 | 1.087705 | 0.350294  | 0.977140  | 1.000      |
| 119  | GOBP-REGULATION-OF-NEUROTRANSMITTER-TRANSPORT     | 6    | 0.459410 | 1.085058 | 0.354709  | 0.976954  | 1.000      |
| 120  | GOBP-REGULATION-OF-ANATOMICAL-STRUCTURE-MORPHO... | 17   | 0.325554 | 1.080761 | 0.369231  | 0.981494  | 1.000      |
| 121  | GOBP-CELL-MORPHOGENESIS-INVOLVED-IN-DIFFERENTI... | 21   | 0.307997 | 1.078785 | 0.360687  | 0.979547  | 1.000      |
| 122  | GOBP-DENDRITIC-SPINE-DEVELOPMENT                  | 6    | 0.458716 | 1.077025 | 0.360000  | 0.976507  | 1.000      |
| 123  | GOBP-CALCIUM-ION-TRANSMEMBRANE-TRANSPORT          | 7    | 0.407058 | 1.074369 | 0.366279  | 0.976179  | 1.000      |
| 124  | GOBP-REGULATION-OF-PROTEIN-LOCALIZATION-TO-CEL... | 6    | 0.459751 | 1.068439 | 0.383364  | 0.985589  | 1.000      |
| 125  | GOBP-CELLULAR-RESPONSE-TO-ABIOTIC-STIMULUS        | 7    | 0.424712 | 1.068338 | 0.379747  | 0.978040  | 1.000      |
| 126  | GOBP-REGULATION-OF-LIPID-LOCALIZATION             | 5    | 0.471522 | 1.062273 | 0.355809  | 0.987476  | 1.000      |



Continuation of Table S12

| NAME                                                  | ID            | SIZE | ES       | NES      | NOM.p.val | FDR.q.val | FWER.p.val |
|-------------------------------------------------------|---------------|------|----------|----------|-----------|-----------|------------|
| 127 GOBP-NEURON-DIFFERENTIATION                       | GO-0030182    | 36   | 0.270440 | 1.061561 | 0.376426  | 0.981945  | 1.000      |
| 128 GOBP-TISSUE-MORPHOGENESIS                         | GO-0048729    | 7    | 0.433176 | 1.057567 | 0.389299  | 0.986120  | 1.000      |
| 129 REACTOME-MAPK-FAMILY-SIGNALING-CASCADES           | R-RNO-5683057 | 12   | 0.363356 | 1.057383 | 0.360000  | 0.979067  | 1.000      |
| 130 GOBP-CELLULAR-CARBOHYDRATE-METABOLIC-PROCESS      | GO-0044262    | 5    | 0.479705 | 1.055874 | 0.394286  | 0.975939  | 1.000      |
| 131 REACTOME-INTERFERON-SIGNALING                     | R-RNO-913531  | 6    | 0.462584 | 1.054918 | 0.388031  | 0.971249  | 1.000      |
| 132 GOBP-NEGATIVE-REGULATION-OF-CATALYTIC-ACTIVITY    | GO-0043086    | 17   | 0.321296 | 1.054675 | 0.394636  | 0.964675  | 1.000      |
| 133 GOBP-MEMBRANE-ORGANIZATION                        | GO-0061024    | 12   | 0.348778 | 1.054186 | 0.394052  | 0.958887  | 1.000      |
| 134 GOBP-REGULATION-OF-CELL-DEATH                     | GO-0010941    | 34   | 0.271458 | 1.050272 | 0.382716  | 0.962473  | 1.000      |
| 135 GOBP-INNATE-IMMUNE-RESPONSE                       | GO-0045087    | 7    | 0.416964 | 1.046135 | 0.389925  | 0.967067  | 1.000      |
| 136 GOBP-CELL-MORPHOGENESIS-INVOLVED-IN-NEURON-DIF... | GO-0048667    | 21   | 0.307997 | 1.044866 | 0.400000  | 0.963384  | 1.000      |
| 137 GOBP-CALCIUM-ION-TRANSPORT-INTO-CYTOSOL           | GO-0060402    | 7    | 0.419594 | 1.044473 | 0.393881  | 0.957474  | 1.000      |
| 138 GOBP-ION-HOMEOSTASIS                              | GO-0050801    | 16   | 0.323956 | 1.043940 | 0.391386  | 0.951886  | 1.000      |
| 139 GOBP-NEGATIVE-REGULATION-OF-BINDING               | GO-0051100    | 6    | 0.450813 | 1.042911 | 0.399209  | 0.947883  | 1.000      |
| 140 GOBP-CELLULAR-RESPONSE-TO-ORGANIC-CYCLIC-COMPOUND | GO-0071407    | 13   | 0.339044 | 1.042247 | 0.375234  | 0.943052  | 1.000      |
| 141 GOBP-REGULATION-OF-CIRCADIAN-RHYTHM               | GO-0042752    | 7    | 0.424438 | 1.040647 | 0.389210  | 0.940827  | 1.000      |
| 142 GOBP-CYTOSOLIC-CALCIUM-ION-TRANSPORT              | GO-0060401    | 7    | 0.419594 | 1.039804 | 0.397032  | 0.936633  | 1.000      |
| 143 GOBP-BIOLOGICAL-PROCESS-INVOLVED-IN-SYMBIOTIC.... | GO-0044440    | 11   | 0.355021 | 1.039016 | 0.407045  | 0.932487  | 1.000      |
| 144 GOBP-RESPONSE-TO-ABIOTIC-STIMULUS                 | GO-0009628    | 27   | 0.283635 | 1.037845 | 0.395221  | 0.929101  | 1.000      |
| 145 REACTOME-DISEASES-OF-SIGNAL-TRANSDUCTION-BY-GR... | R-HSA-5663202 | 12   | 0.343512 | 1.037206 | 0.387879  | 0.924519  | 1.000      |
| 146 GOBP-NEURON-PROJECTION-ORGANIZATION               | GO-0106027    | 8    | 0.388486 | 1.033247 | 0.400756  | 0.928633  | 1.000      |
| 147 GOBP-REGULATION-OF-DNA-BINDING-TRANSCRIPTION.F... | GO-0051090    | 16   | 0.323758 | 1.033039 | 0.419729  | 0.922774  | 1.000      |
| 148 GOBP-IMMUNE-RESPONSE-REGULATING-SIGNALING-PATHWAY | GO-000276     | 8    | 0.392711 | 1.029455 | 0.404990  | 0.925761  | 1.000      |
| 149 GOBP-REGULATION-OF-MEMBRANE-POTENTIAL             | GO-0042391    | 17   | 0.307845 | 1.029203 | 0.414313  | 0.920301  | 1.000      |
| 150 GOBP-CELLULAR-MACROMOLECULE-LOCALIZATION          | GO-0070727    | 21   | 0.291373 | 1.028264 | 0.415385  | 0.916554  | 1.000      |
| 151 GOBP-NEGATIVE-REGULATION-OF-INTRACELLULAR-SIGN... | GO-1902532    | 7    | 0.407904 | 1.028053 | 0.408318  | 0.911033  | 1.000      |
| 152 GOBP-PURINE-CONTAINING-COMPOUND-METABOLIC-PROCESS | GO-0072521    | 5    | 0.457319 | 1.027097 | 0.413793  | 0.907393  | 1.000      |
| 153 GOBP-NEGATIVE-REGULATION-OF-HYDROLASE-ACTIVITY    | GO-0051346    | 11   | 0.348570 | 1.024390 | 0.425182  | 0.908427  | 1.000      |
| 154 GOBP-FC-RECEPTOR-SIGNALING-PATHWAY                | GO-0038093    | 8    | 0.392711 | 1.024169 | 0.420233  | 0.903077  | 1.000      |
| 155 GOBP-REGULATION-OF-SYNAPTIC-PLASTICITY            | GO-0048167    | 21   | 0.289887 | 1.022758 | 0.427798  | 0.900573  | 1.000      |
| 156 GOBP-NEGATIVE-REGULATION-OF-LIPID-METABOLIC-PR... | GO-0045833    | 5    | 0.467277 | 1.022428 | 0.430528  | 0.895637  | 1.000      |
| 157 GOBP-MORPHOGENESIS-OF-AN-EPITHELIUM               | GO-0002009    | 6    | 0.434657 | 1.014973 | 0.419776  | 0.908418  | 1.000      |
| 158 GOBP-POSITIVE-REGULATION-OF-LONG-TERM-SYNAPTIC... | GO-0022411    | 5    | 0.419650 | 1.006000 | 0.435845  | 0.923892  | 1.000      |
| 159 GOBP-CELLULAR-COMPOONENT-DISASSEMBLY              | GO-1900273    | 20   | 0.299109 | 1.005229 | 0.440454  | 0.915517  | 1.000      |
| 160 GOBP-CELLULAR-RESPONSE-TO-NITROGEN-COMPOUND       | GO-001699     | 20   | 0.370471 | 1.000882 | 0.422311  | 0.920492  | 1.000      |
| 161 GOBP-LIPID-METABOLIC-PROCESS                      | GO-0006629    | 10   | 0.317513 | 0.999257 | 0.474806  | 0.918982  | 1.000      |
| 162 GOBP-PROTEIN-CONTAINING-COMPLEX-SUBUNIT-ORGANI... | GO-0043933    | 14   | 0.384669 | 0.996918 | 0.433712  | 0.919149  | 1.000      |
| 163 GOBP-MYELOID-LEUKOCYTE-ACTIVATION                 | GO-0002274    | 8    | 0.414724 | 0.996597 | 0.450943  | 0.914387  | 1.000      |
| 164 GOBP-REGULATION-OF-POSTSYNAPSE-ORGANIZATION       | GO-0099175    | 6    | 0.396953 | 0.996004 | 0.450192  | 0.910261  | 1.000      |
| 165 GOBP-LEUKOCYTE-MEDIATED-IMMUNITY                  | GO-0002443    | 7    | 0.414994 | 0.995828 | 0.471664  | 0.905301  | 1.000      |
| 166 GOBP-MONOCARBOXYLIC-ACID-METABOLIC-PROCESS        | GO-0032787    | 6    | 0.312188 | 0.995270 | 0.479705  | 0.901291  | 1.000      |
| 167 GOBP-CELLULAR-RESPONSE-TO-LIPID                   | GO-0071396    | 15   | 0.332749 | 0.991903 | 0.457249  | 0.904456  | 1.000      |
| 168 GOBP-METAL-ION-TRANSPORT                          | GO-0030001    | 11   | 0.332749 | 0.991903 | 0.457249  | 0.904456  | 1.000      |
| 169 GOBP-REGULATION-OF-METAL-ION-TRANSPORT            | GO-0010959    | 6    | 0.418273 | 0.984740 | 0.457594  | 0.916178  | 1.000      |

Continuation of Table S12

| NAME | ID                                                | SIZE | ES       | NES      | NOM.p.val | FDR.q.val | FWER.p.val |
|------|---------------------------------------------------|------|----------|----------|-----------|-----------|------------|
| 170  | GOBP-REGULATION-OF-PEPTIDASE-ACTIVITY             | 10   | 0.347059 | 0.984723 | 0.465160  | 0.910851  | 1.000      |
| 171  | GOBP-NEUROGENESIS                                 | 40   | 0.250693 | 0.982420 | 0.466179  | 0.911267  | 1.000      |
| 172  | GOBP-REGULATION-OF-CYSTEINE-TYPE-ENDOPEPTIDASE... | 9    | 0.357373 | 0.981355 | 0.485714  | 0.908361  | 1.000      |
| 173  | GOBP-NEUROTRANSMITTER-TRANSPORT                   | 7    | 0.390018 | 0.979530 | 0.495088  | 0.907485  | 1.000      |
| 174  | GOBP-CELLULAR-ION-HOMEOSTASIS                     | 14   | 0.312609 | 0.979095 | 0.479769  | 0.903351  | 1.000      |
| 175  | GOBP-RESPONSE-TO-INORGANIC-SUBSTANCE              | 19   | 0.283453 | 0.977421 | 0.488189  | 0.902277  | 1.000      |
| 176  | GOBP-REGULATION-OF-CELL-PROJECTION-ORGANIZATION   | 20   | 0.282854 | 0.975901 | 0.454714  | 0.900691  | 1.000      |
| 177  | REACTOME-DEATH-RECEPTOR-SIGNALING                 | 5    | 0.443503 | 0.974998 | 0.474187  | 0.897617  | 1.000      |
| 178  | GOBP-POSITIVE-REGULATION-OF-PEPTIDASE-ACTIVITY    | 7    | 0.382506 | 0.973969 | 0.486486  | 0.895059  | 1.000      |
| 179  | GOBP-CELL-PROJECTION-ORGANIZATION                 | 34   | 0.247858 | 0.973406 | 0.498127  | 0.891501  | 1.000      |
| 180  | GOBP-MONOAMINE-TRANSPORT                          | 5    | 0.436190 | 0.972685 | 0.470588  | 0.888112  | 1.000      |
| 181  | REACTOME-CLASS-C-3-METABOTROPIC-GLUTAMATE-PHER... | 7    | 0.388363 | 0.970466 | 0.489066  | 0.885528  | 1.000      |
| 182  | GOBP-CELL-CELL-SIGNALING                          | 56   | 0.246844 | 0.970390 | 0.516729  | 0.883836  | 1.000      |
| 183  | GOBP-CELLULAR-RESPONSE-TO-BIOTIC-STIMULUS         | 8    | 0.372045 | 0.968683 | 0.446565  | 0.882977  | 1.000      |
| 184  | GOBP-REGULATION-OF-NEUROTRANSMITTER-LEVELS        | 7    | 0.390018 | 0.963483 | 0.492000  | 0.889946  | 1.000      |
| 185  | GOBP-REGULATION-OF-SMALL-MOLECULE-METABOLIC-PR... | 9    | 0.352176 | 0.962927 | 0.497186  | 0.886396  | 1.000      |
| 186  | GOBP-RESPONSE-TO-PEPTIDE                          | 18   | 0.290173 | 0.962011 | 0.504817  | 0.883828  | 1.000      |
| 187  | GOBP-POSITIVE-REGULATION-OF-DNA-BINDING-TRANSC... | 10   | 0.342296 | 0.961944 | 0.491651  | 0.879249  | 1.000      |
| 188  | GOBP-CALCIUM-ION-TRANSPORT                        | 11   | 0.332734 | 0.957760 | 0.501010  | 0.883825  | 1.000      |
| 189  | GOBP-CELL-CELL-JUNCTION-ORGANIZATION              | 6    | 0.402150 | 0.954384 | 0.485149  | 0.886741  | 1.000      |
| 190  | GOBP-NUCLEOBASE-CONTAINING-SMALL-MOLECULE-META... | 6    | 0.390479 | 0.951806 | 0.497248  | 0.887984  | 1.000      |
| 191  | GOBP-POSITIVE-REGULATION-OF-CYSTEINE-TYPE-ENDO... | 7    | 0.382506 | 0.949186 | 0.504836  | 0.889052  | 1.000      |
| 192  | GOBP-CELLULAR-RESPONSE-TO-MOLECULE-OF-BACTERIA... | 8    | 0.372045 | 0.946386 | 0.512195  | 0.890450  | 1.000      |
| 193  | GOBP-REGULATION-OF-CELLULAR-RESPONSE-TO-STRESS    | 9    | 0.347656 | 0.942644 | 0.478846  | 0.893936  | 1.000      |
| 194  | GOBP-RESPONSE-TO-HORMONE                          | 20   | 0.269218 | 0.941289 | 0.533203  | 0.892206  | 1.000      |
| 195  | GOBP-G-PROTEIN-COUPLED-GLUTAMATE-RECEPTOR-SIGN... | 8    | 0.355481 | 0.937343 | 0.504854  | 0.896167  | 1.000      |
| 196  | GOBP-AMIDE-BIOSYNTHETIC-PROCESS                   | 7    | 0.370359 | 0.925960 | 0.520599  | 0.917174  | 1.000      |
| 197  | REACTOME-TRANSCRIPTIONAL-REGULATION-BY-MECP2      | 7    | 0.367854 | 0.923250 | 0.558608  | 0.918499  | 1.000      |
| 198  | GOBP-POSITIVE-REGULATION-OF-EPITHELIAL-CELL-MI... | 5    | 0.411448 | 0.922268 | 0.532673  | 0.916225  | 1.000      |
| 199  | GOBP-PEPTIDE-BIOSYNTHETIC-PROCESS                 | 7    | 0.370359 | 0.919648 | 0.545977  | 0.917395  | 1.000      |
| 200  | GOBP-RESPONSE-TO-LUV                              | 5    | 0.418289 | 0.919499 | 0.544304  | 0.913182  | 1.000      |
| 201  | REACTOME-TRAFFICKING-OF-GLUR2-CONTAINING-AMPA...  | 8    | 0.356793 | 0.916066 | 0.574510  | 0.916193  | 1.000      |
| 202  | GOBP-NEGATIVE-REGULATION-OF-PHOSPHORYLATION       | 7    | 0.358529 | 0.914931 | 0.565619  | 0.914247  | 1.000      |
| 203  | GOBP-REGULATION-OF-NEURONAL-SYNAPTIC-PLASTICITY   | 7    | 0.368752 | 0.912572 | 0.581262  | 0.914885  | 1.000      |
| 204  | GOBP-CHROMATIN-ORGANIZATION                       | 5    | 0.412014 | 0.911626 | 0.558767  | 0.912375  | 1.000      |
| 205  | GOBP-LIPID-LOCALIZATION                           | 10   | 0.321276 | 0.904167 | 0.568932  | 0.924083  | 1.000      |
| 206  | REACTOME-GPCR-LIGAND-BINDING                      | 8    | 0.350766 | 0.903521 | 0.565056  | 0.921107  | 1.000      |
| 207  | GOBP-REGULATION-OF-PROTEIN-LOCALIZATION-TO-MEM... | 7    | 0.350512 | 0.899644 | 0.544423  | 0.925018  | 1.000      |
| 208  | GOBP-DENDRITE-DEVELOPMENT                         | 9    | 0.337296 | 0.899244 | 0.590164  | 0.921416  | 1.000      |
| 209  | GOBP-REGULATION-OF-TRANSPORTER-ACTIVITY           | 17   | 0.269605 | 0.897677 | 0.588583  | 0.920326  | 1.000      |
| 210  | GOBP-TRANSMEMBRANE-TRANSPORT                      | 27   | 0.239632 | 0.895454 | 0.608133  | 0.920583  | 1.000      |
| 211  | GOBP-PEPTIDE-METABOLIC-PROCESS                    | 12   | 0.291689 | 0.893916 | 0.579737  | 0.919553  | 1.000      |
| 212  | GOBP-ORGANIC-ACID-TRANSPORT                       | 7    | 0.357413 | 0.891554 | 0.586207  | 0.920520  | 1.000      |

Continuation of Table S12

| NAME                                                  | ID            | SIZE | ES       | NES      | NOM.p.val | FDR.q.val | FWER.p.val |
|-------------------------------------------------------|---------------|------|----------|----------|-----------|-----------|------------|
| 213 REACTOME-INTEGRATION_OF_ENERGY_METABOLISM         | R-RNO-163685  | 5    | 0.396270 | 0.88936  | 0.583658  | 0.921664  | 1.000      |
| 214 GOBP-DEFENSE-RESPONSE                             | GO-0006952    | 19   | 0.260661 | 0.883292 | 0.617375  | 0.929224  | 1.000      |
| 215 REACTOME-OPIOID-SIGNALING                         | R-RNO-111885  | 12   | 0.292389 | 0.877554 | 0.619329  | 0.936954  | 1.000      |
| 216 GOBP-POSITIVE-REGULATION_OF_HYDROLASE-ACTIVITY    | GO-0051345    | 16   | 0.268775 | 0.876779 | 0.609524  | 0.934229  | 1.000      |
| 217 REACTOME-G-PROTEIN-MEDIATED-EVENTS                | R-RNO-112040  | 9    | 0.321144 | 0.874675 | 0.609195  | 0.934320  | 1.000      |
| 218 GOBP-CELLULAR-LIPID-METABOLIC-PROCESS             | GO-0044255    | 7    | 0.348862 | 0.874139 | 0.606403  | 0.931096  | 1.000      |
| 219 GOBP-POSITIVE-REGULATION_OF_CELL-PROJECTION_OR... | GO-0031346    | 10   | 0.312916 | 0.871929 | 0.598425  | 0.931311  | 1.000      |
| 220 REACTOME-G-ALPHA1-SIGNALING-EVENTS                | R-RNO-418594  | 18   | 0.259510 | 0.865754 | 0.654611  | 0.940146  | 1.000      |
| 221 GOBP-CIRCADIAN-RHYTHM                             | GO-0007623    | 13   | 0.287040 | 0.865731 | 0.642293  | 0.935966  | 1.000      |
| 222 GOBP-RESPONSE-TO-LIGHT-STIMULUS                   | GO-0009416    | 11   | 0.302633 | 0.865727 | 0.635659  | 0.931781  | 1.000      |
| 223 GOBP-ADENYLATE-CYCLASE-INHIBITING-G-PROTEIN_CO... | GO-0007196    | 5    | 0.380858 | 0.863708 | 0.603622  | 0.927653  | 1.000      |
| 224 GOBP-ORGANIC-ACID-METABOLIC-PROCESS               | GO-0006082    | 7    | 0.337435 | 0.861323 | 0.651515  | 0.932241  | 1.000      |
| 225 GOBP-CARBOHYDRATE-HOMEOSTASIS                     | GO-0033500    | 7    | 0.340805 | 0.853592 | 0.611321  | 0.943670  | 1.000      |
| 226 GOBP-RESPONSE-TO-LIPID                            | GO-0033993    | 19   | 0.245778 | 0.850103 | 0.686567  | 0.946427  | 1.000      |
| 227 GOBP-REGULATION_OF_NEURON-PROJECTION-DEVELOPMENT  | GO-0010975    | 16   | 0.256981 | 0.847185 | 0.640884  | 0.947871  | 1.000      |
| 228 GOBP-CELL-CYCLE-PROCESS                           | GO-0022402    | 11   | 0.289247 | 0.844740 | 0.644841  | 0.948574  | 1.000      |
| 229 GOBP-REGULATION_OF_PROTEIN-KINASE-ACTIVITY        | GO-0045859    | 22   | 0.238338 | 0.843939 | 0.680529  | 0.945904  | 1.000      |
| 230 REACTOME-MEMBRANE-TRAFFICKING                     | R-RNO-199991  | 5    | 0.378263 | 0.841714 | 0.626667  | 0.946037  | 1.000      |
| 231 GOBP-DENDRITIC-SPINE-MORPHOGENESIS                | GO-0060997    | 5    | 0.383785 | 0.840892 | 0.615830  | 0.943584  | 1.000      |
| 232 REACTOME-VESICLE-MEDIATED-TRANSPORT               | R-RNO-5653656 | 5    | 0.378263 | 0.840365 | 0.605210  | 0.940561  | 1.000      |
| 233 REACTOME-CELLULAR-RESPONSES-TO-EXTERNAL-STIMULI   | R-RNO-8953897 | 12   | 0.282566 | 0.837989 | 0.660952  | 0.941259  | 1.000      |
| 234 GOBP-REGULATION_OF_CELLULAR-LOCALIZATION          | GO-0060341    | 17   | 0.253392 | 0.836788 | 0.683919  | 0.939613  | 1.000      |
| 235 GOBP-REGULATION_OF_CATION-CHANNEL-ACTIVITY        | GO-2001257    | 14   | 0.271212 | 0.836063 | 0.687140  | 0.937045  | 1.000      |
| 236 GOBP-REGULATION_OF-TRANSFERASE-ACTIVITY           | GO-0051338    | 22   | 0.238338 | 0.832550 | 0.675325  | 0.939704  | 1.000      |
| 237 GOBP-REGULATION_OF-TRANSMISSION-GLUTA...          | GO-0051966    | 12   | 0.277533 | 0.831553 | 0.662942  | 0.937683  | 1.000      |
| 238 GOBP-RESPONSE-TO-MECHANICAL-STIMULUS              | GO-0009612    | 6    | 0.343800 | 0.830438 | 0.663620  | 0.935989  | 1.000      |
| 239 GOBP-REGULATION_OF-LIPID-BIOSYNTHETIC-PROCESS     | GO-0046890    | 6    | 0.348824 | 0.828937 | 0.631179  | 0.934991  | 1.000      |
| 240 GOBP-EPHRIIN-RECEPTOR-SIGNALING-PATHWAY           | GO-0048013    | 5    | 0.373630 | 0.827878 | 0.667276  | 0.933158  | 1.000      |
| 241 GOBP-REGULATION_OF-LIPID-METABOLIC-PROCESS        | GO-0019216    | 7    | 0.334597 | 0.825843 | 0.680970  | 0.933070  | 1.000      |
| 242 GOBP-REGULATION_OF-BINDING                        | GO-0051098    | 11   | 0.283300 | 0.825405 | 0.677485  | 0.930081  | 1.000      |
| 243 GOBP-DEVELOPMENTAL-MATURATION                     | GO-0021700    | 5    | 0.371699 | 0.824958 | 0.689788  | 0.927111  | 1.000      |
| 244 GOBP-CELLULAR-AMIDE-METABOLIC-PROCESS             | GO-0043603    | 13   | 0.271337 | 0.822135 | 0.669903  | 0.928731  | 1.000      |
| 245 REACTOME-EXTRACELLULAR-MATRIX-ORGANIZATION        | R-RNO-1474244 | 5    | 0.373111 | 0.813596 | 0.674374  | 0.940641  | 1.000      |
| 246 REACTOME-CREB1-PHOSPHORYLATION_THROUGH-NMDA-RE... | R-RNO-442742  | 8    | 0.317774 | 0.812689 | 0.706865  | 0.938528  | 1.000      |
| 247 GOBP-RESPONSE-TO-OXYGEN-LEVELS                    | GO-0070482    | 8    | 0.308629 | 0.810585 | 0.686992  | 0.938419  | 1.000      |
| 248 GOBP-CELLULAR-HOMEOSTASIS                         | GO-0019725    | 18   | 0.241028 | 0.807897 | 0.719536  | 0.939391  | 1.000      |
| 249 GOBP-LIPID-BIOSYNTHETIC-PROCESS                   | GO-0008610    | 6    | 0.348824 | 0.807835 | 0.699422  | 0.935790  | 1.000      |
| 250 HALLMARK-KRAS-SIGNALING-UP                        | M5953         | 6    | 0.353659 | 0.806476 | 0.695327  | 0.934730  | 1.000      |
| 251 REACTOME_CA-DEPENDENT-EVENTS                      | R-RNO-111996  | 8    | 0.312355 | 0.806235 | 0.706320  | 0.931387  | 1.000      |
| 252 GOBP-CELLULAR-GLUCOSE-HOMEOSTASIS                 | GO-0001678    | 5    | 0.367711 | 0.804152 | 0.706667  | 0.931676  | 1.000      |
| 253 GOBP-REGULATION_OF-TRANS-SYNAPTIC-SIGNALING       | GO-0099177    | 40   | 0.206981 | 0.801417 | 0.777365  | 0.933142  | 1.000      |
| 254 GOBP-HOMEOSTATIC-PROCESS                          | GO-0042592    | 31   | 0.207882 | 0.794460 | 0.780669  | 0.942172  | 1.000      |
| 255 GOBP-SYNAPTIC-SIGNALING                           | GO-0099536    | 47   | 0.199763 | 0.792993 | 0.768482  | 0.941205  | 1.000      |

Continuation of Table S12

| NAME                                                   | ID            | SIZE | ES       | NES      | NOM.p.val | FDR.q.val | FWER.p.val |
|--------------------------------------------------------|---------------|------|----------|----------|-----------|-----------|------------|
| 256 GOBP-RESPONSE.TO.OXIDATIVE-STRESS                  | GO-0006979    | 8    | 0.293935 | 0.791877 | 0.707865  | 0.939705  | 1.000      |
| 257 REACTOME-DEVELOPMENTAL-BIOLOGY                     | R-RNO-1266738 | 23   | 0.213141 | 0.788358 | 0.751402  | 0.942282  | 1.000      |
| 258 GOBP-POSITIVE-REGULATION-OF-DEFENSE-RESPONSE       | GO-0031349    | 5    | 0.354899 | 0.782766 | 0.714008  | 0.948455  | 1.000      |
| 259 GOBP-REGULATION-OF-LONG-TERM-SYNAPTIC-POTENTIAL... | GO-1900271    | 6    | 0.322412 | 0.781691 | 0.721190  | 0.946756  | 1.000      |
| 260 GOBP-SYNAPTIC-TRANSMISSION-GLUTAMATERGIC           | GO-0035249    | 13   | 0.251809 | 0.779644 | 0.729242  | 0.946475  | 1.000      |
| 261 GOBP-LEUKOCYTE-MIGRATION                           | GO-0050900    | 6    | 0.324711 | 0.775101 | 0.728846  | 0.950337  | 1.000      |
| 262 REACTOME-NERVOUS-SYSTEM-DEVELOPMENT                | R-RNO-9675108 | 15   | 0.239258 | 0.773632 | 0.774067  | 0.949345  | 1.000      |
| 263 GOBP-POSITIVE-REGULATION-OF-CELL-GROWTH            | GO-0030307    | 6    | 0.328895 | 0.772978 | 0.718310  | 0.946797  | 1.000      |
| 264 GOBP-CHROMOSOME-ORGANIZATION                       | GO-0051276    | 6    | 0.330331 | 0.771235 | 0.743396  | 0.946142  | 1.000      |
| 265 GOBP-REGULATION-OF-MUSCLE-CELL-DIFFERENTIATION     | GO-0051147    | 6    | 0.327717 | 0.767821 | 0.738140  | 0.948031  | 1.000      |
| 266 GOBP-NEGATIVE-REGULATION-OF-SYNAPTIC-TRANSMISSION  | GO-0050805    | 6    | 0.319437 | 0.767107 | 0.744639  | 0.945664  | 1.000      |
| 267 GOBP-TISSUE-HOMEOSTASIS                            | GO-0001894    | 5    | 0.346281 | 0.763209 | 0.765799  | 0.948525  | 1.000      |
| 268 GOBP-REGULATION-OF-SIGNALING-RECEPTOR-ACTIVITY     | GO-0010469    | 14   | 0.243745 | 0.755460 | 0.788151  | 0.957130  | 1.000      |
| 269 GOBP-PHAGOCYTOSIS                                  | GO-0006909    | 5    | 0.343375 | 0.754432 | 0.777164  | 0.955363  | 1.000      |
| 270 GOBP-REGULATION-OF-ENDOTHELIAL-CELL-MIGRATION      | GO-0010594    | 5    | 0.337736 | 0.752240 | 0.741445  | 0.955273  | 1.000      |
| 271 GOBP-RESPONSE.TO-REACTIVE-OXYGEN-SPECIES           | GO-0000302    | 8    | 0.293935 | 0.748928 | 0.793103  | 0.956977  | 1.000      |
| 272 REACTOME-G-ALPHA-Z-SIGNALING-EVENTS                | R-RNO-418597  | 5    | 0.330284 | 0.746144 | 0.779026  | 0.957829  | 1.000      |
| 273 GOBP-REGULATION-OF-ANATOMICAL-STRUCTURE-SIZE       | GO-0090066    | 10   | 0.264047 | 0.742440 | 0.778672  | 0.960302  | 1.000      |
| 274 GOBP-RESPONSE.TO-HEAT                              | GO-0009408    | 7    | 0.295050 | 0.741020 | 0.749012  | 0.958969  | 1.000      |
| 275 GOBP-IMPORT-INTO-CELL                              | GO-0098657    | 6    | 0.307442 | 0.736290 | 0.788497  | 0.962602  | 1.000      |
| 276 GOBP-POSITIVE-REGULATION-OF-CATALYTIC-ACTIVITY     | GO-0043085    | 30   | 0.197456 | 0.735547 | 0.841418  | 0.960231  | 1.000      |
| 277 GOBP-RESPONSE.TO-NICOTINE                          | GO-0035094    | 7    | 0.291804 | 0.733417 | 0.777778  | 0.959910  | 1.000      |
| 278 GOBP-PROTEIN-MODIFICATION-BY-SMALL-PROTEIN.CON...  | GO-0070647    | 7    | 0.296117 | 0.731456 | 0.789077  | 0.959198  | 1.000      |
| 279 GOBP-REGULATION-OF-PROTEOLYSIS                     | GO-0030162    | 12   | 0.247674 | 0.731135 | 0.822857  | 0.956246  | 1.000      |
| 280 GOBP-POSITIVE-REGULATION-OF-MOLECULAR-FUNCTION     | GO-0044093    | 38   | 0.185061 | 0.727425 | 0.870270  | 0.958267  | 1.000      |
| 281 GOBP-CARBOXYLIC-ACID-TRANSPORT                     | GO-0046942    | 6    | 0.301914 | 0.721422 | 0.813462  | 0.963427  | 1.000      |
| 282 GOBP-MACROMOLECULE-CATABOLIC-PROCESS               | GO-0009057    | 12   | 0.242237 | 0.719259 | 0.828846  | 0.962974  | 1.000      |
| 283 GOBP-FATTY-ACID-TRANSPORT                          | GO-0015908    | 6    | 0.297320 | 0.715959 | 0.875000  | 0.964024  | 1.000      |
| 284 GOBP-AMINO-ACID-TRANSPORT                          | GO-0006865    | 6    | 0.301914 | 0.715152 | 0.808300  | 0.961654  | 1.000      |
| 285 REACTOME-CYTOKINE-SIGNALING-IN-IMMUNE-SYSTEM       | R-RNO-1280215 | 21   | 0.208564 | 0.714243 | 0.853229  | 0.959638  | 1.000      |
| 286 GOBP-MEMORY                                        | GO-0007613    | 13   | 0.23206  | 0.712980 | 0.862934  | 0.958073  | 1.000      |
| 287 GOBP-REGULATION-OF-HYDROLASE-ACTIVITY              | GO-0051336    | 22   | 0.193388 | 0.703611 | 0.867993  | 0.967384  | 1.000      |
| 288 GOBP-SYNAPSE-ORGANIZATION                          | GO-0050808    | 17   | 0.211608 | 0.702442 | 0.838951  | 0.965781  | 1.000      |
| 289 GOBP-REGULATION-OF-EPITHELIAL-CELL-MIGRATION       | GO-0010632    | 6    | 0.300762 | 0.700556 | 0.819066  | 0.964929  | 1.000      |
| 290 GOBP-ORGANIC-ANION-TRANSPORT                       | GO-0015711    | 6    | 0.301914 | 0.700302 | 0.843100  | 0.961976  | 1.000      |
| 291 REACTOME-INTERLEUKIN-17-SIGNALING                  | R-RNO-448424  | 6    | 0.295063 | 0.693681 | 0.854685  | 0.967384  | 1.000      |
| 292 GOBP-REGULATION-OF-CELL-SIZE                       | GO-0008361    | 5    | 0.313253 | 0.689142 | 0.839695  | 0.970118  | 1.000      |
| 293 REACTOME-L1CAM-INTERACTIONS                        | R-RNO-373760  | 5    | 0.309009 | 0.687405 | 0.833333  | 0.968941  | 1.000      |
| 294 GOBP-POSITIVE-REGULATION-OF-SECRETION              | GO-0051047    | 6    | 0.290187 | 0.686810 | 0.834368  | 0.966388  | 1.000      |
| 295 HALLMARK-EPITHELIAL-MESENCHYMAL-TRANSITION         | M5930         | 5    | 0.313253 | 0.686411 | 0.856631  | 0.963662  | 1.000      |
| 296 GOBP-SIGNAL-RELEASE                                | GO-0023061    | 14   | 0.218155 | 0.686170 | 0.861272  | 0.960739  | 1.000      |
| 297 GOBP-MULTICELLULAR-ORGANISMAL-HOMEOSTASIS          | GO-0048871    | 12   | 0.231059 | 0.684004 | 0.859922  | 0.960114  | 1.000      |
| 298 REACTOME-INTRACELLULAR-SIGNALING-BY-SECOND-MES...  | R-RNO-9006925 | 15   | 0.215209 | 0.680585 | 0.875000  | 0.960998  | 1.000      |

Continuation of Table S12

| NAME | ID                                                | SIZE | ES        | NES       | NOM.p.val | FDR.q.val | FWER.p.val |
|------|---------------------------------------------------|------|-----------|-----------|-----------|-----------|------------|
| 299  | GOBP-LONG-TERM-MEMORY                             | 6    | 0.293141  | 0.680347  | 0.856016  | 0.958036  | 1.000      |
| 300  | GOBP-REGULATION-OF-GROWTH                         | 13   | 0.220873  | 0.679830  | 0.884990  | 0.955506  | 1.000      |
| 301  | GOBP-REGULATION-OF-AXONOGENESIS                   | 7    | 0.275751  | 0.679046  | 0.850860  | 0.953338  | 1.000      |
| 302  | GOBP-DEFENSE-RESPONSE-TO-OTHER-ORGANISM           | 9    | 0.242620  | 0.669537  | 0.868668  | 0.961543  | 1.000      |
| 303  | GOBP-PROTEIN-COMPLEX-OLIGOMERIZATION              | 6    | 0.280488  | 0.660281  | 0.898467  | 0.968989  | 1.000      |
| 304  | GOBP-PROTEIN-CATABOLIC-PROCESS                    | 8    | 0.252928  | 0.652824  | 0.863281  | 0.973925  | 1.000      |
| 305  | GOBP-REGULATION-OF-CELLULAR-PROTEIN-LOCALIZATION  | 12   | 0.216407  | 0.641644  | 0.899431  | 0.982249  | 1.000      |
| 306  | GOBP-MULTICELLULAR-ORGANISM-REPRODUCTION          | 12   | 0.215359  | 0.635015  | 0.915851  | 0.985680  | 1.000      |
| 307  | GOBP-RESPONSE-TO-MONOSACCHARIDE                   | 5    | 0.285028  | 0.634057  | 0.889439  | 0.983380  | 1.000      |
| 308  | GOBP-RESPONSE-TO-CARBOHYDRATE                     | 5    | 0.285028  | 0.633948  | 0.920849  | 0.980312  | 1.000      |
| 309  | GOBP-POSITIVE-REGULATION-OF-SIGNALING             | 34   | 0.162188  | 0.629597  | 0.933573  | 0.981168  | 1.000      |
| 310  | GOBP-LIPID-EXPORT-FROM-CELL                       | 5    | 0.286001  | 0.629435  | 0.886100  | 0.978110  | 1.000      |
| 311  | GOBP-RESPONSE-TO-RADIATION                        | 13   | 0.199795  | 0.614111  | 0.924797  | 0.988360  | 1.000      |
| 312  | GOBP-NEGATIVE-REGULATION-OF-PROTEIN-CATABOLIC-... | 5    | 0.283785  | 0.608440  | 0.902622  | 0.990070  | 1.000      |
| 313  | GOBP-DENDRITE-MORPHOGENESIS                       | 6    | 0.246336  | 0.594799  | 0.938462  | 0.996975  | 1.000      |
| 314  | GOBP-LONG-TERM-SYNAPTIC-DEPRESSION                | 5    | 0.277108  | 0.594548  | 0.953488  | 0.993990  | 1.000      |
| 315  | GOBP-DEVELOPMENTAL-PROCESS-INVOLVED-IN-REPRODU... | 11   | 0.207086  | 0.585594  | 0.948718  | 0.997271  | 1.000      |
| 316  | GOBP-LONG-TERM-SYNAPTIC-POTENTIATION              | 12   | 0.185252  | 0.559760  | 0.959770  | 1.000000  | 1.000      |
| 317  | GOBP-RESPIRATORY-SYSTEM-DEVELOPMENT               | 6    | 0.233123  | 0.557378  | 0.968064  | 1.000000  | 1.000      |
| 318  | GOBP-EPITHELIAL-DEVELOPMENT                       | 15   | 0.175139  | 0.555795  | 0.979284  | 1.000000  | 1.000      |
| 319  | GOBP-RESPONSE-TO-METAL-ION                        | 5    | 0.176868  | 0.553491  | 0.966403  | 1.000000  | 1.000      |
| 320  | GOBP-RESPONSE-TO-ALKALOID                         | 5    | 0.253012  | 0.552635  | 0.971429  | 1.000000  | 1.000      |
| 321  | GOBP-NEGATIVE-REGULATION-OF-PROTEIN-METABOLIC-... | 20   | 0.154904  | 0.541200  | 0.975096  | 1.000000  | 1.000      |
| 322  | GOBP-LOCOMOTORY-BEHAVIOR                          | 7    | 0.209876  | 0.534543  | 0.972167  | 1.000000  | 1.000      |
| 323  | GOBP-REGULATION-OF-PROTEIN-TYROSINE-KINASE-ACT... | 5    | 0.226692  | 0.513598  | 0.990892  | 1.000000  | 1.000      |
| 324  | GOBP-POSITIVE-REGULATION-OF-PROTEIN-TYROSINE-K... | 5    | 0.226692  | 0.494297  | 0.990272  | 1.000000  | 1.000      |
| 325  | GOBP-CELLULAR-MACROMOLECULE-CATABOLIC-PROCESS     | 6    | 0.205525  | 0.492125  | 0.988000  | 1.000000  | 1.000      |
| 326  | GOBP-MONOCARBOXYLIC-ACID-TRANSPORT                | 5    | 0.221969  | 0.490913  | 0.990138  | 1.000000  | 1.000      |
| 327  | GOBP-DICARBOXYLIC-ACID-TRANSPORT                  | 5    | 0.221969  | 0.488723  | 0.983806  | 1.000000  | 1.000      |
| 328  | GOBP-ACIDIC-AMINO-ACID-TRANSPORT                  | 5    | 0.221969  | 0.488624  | 0.990758  | 0.999477  | 1.000      |
| 329  | GOBP-POSITIVE-REGULATION-OF-CATION-TRANSMEMBR...  | 5    | 0.216867  | 0.483912  | 0.984526  | 0.997421  | 1.000      |
| 330  | GOBP-ENDOCRINE-SYSTEM-DEVELOPMENT                 | 6    | 0.195122  | 0.459736  | 0.998073  | 0.998173  | 1.000      |
| 331  | GOBP-POSITIVE-REGULATION-OF-SYNAPTIC-TRANSMISSION | 15   | 0.123646  | 0.387066  | 1.000000  | 0.999577  | 1.000      |
| 332  | GOBP-ASSOCIATIVE-LEARNING                         | 7    | -0.172840 | -0.437457 | 0.997925  | 0.997725  | 1.000      |
| 333  | GOBP-LEARNING                                     | 13   | -0.160000 | -0.509510 | 0.989407  | 0.988764  | 1.000      |
| 334  | GOBP-DEVELOPMENTAL-CELL-GROWTH                    | 5    | -0.231032 | -0.511076 | 0.984704  | 0.990831  | 1.000      |
| 335  | GOBP-SENSORY-PERCEPTION-OF-PAIN                   | 5    | -0.228916 | -0.511214 | 0.988327  | 0.993362  | 1.000      |
| 336  | GOBP-POSITIVE-REGULATION-OF-AXONOGENESIS          | 5    | -0.228072 | -0.515626 | 0.985972  | 0.994722  | 1.000      |
| 337  | GOBP-INTRINSIC-APOPTOTIC-SIGNALING-PATHWAY        | 5    | -0.238854 | -0.536096 | 0.979798  | 0.990148  | 1.000      |
| 338  | GOBP-TELECEPHALON-DEVELOPMENT                     | 6    | -0.225076 | -0.538504 | 0.968685  | 0.991723  | 1.000      |
| 339  | GOBP-ORGANONITROGEN-COMPOUND-CATABOLIC-PROCESS    | 9    | -0.196260 | -0.542240 | 0.976143  | 0.992776  | 1.000      |
| 340  | GOBP-CELLULAR-RESPONSE-TO-CHEMICAL-STRESS         | 7    | -0.213626 | -0.543730 | 0.966457  | 0.994763  | 1.000      |
| 341  | GOBP-NEGATIVE-REGULATION-OF-PROTEIN-MODIFICATI... | 10   | -0.192595 | -0.545186 | 0.969290  | 0.995445  | 1.000      |

Continuation of Table S12

|     | NAME                                              | ID            | SIZE | ES        | NES       | NOM.p.val | FDR.q.val | FWER.p.val |
|-----|---------------------------------------------------|---------------|------|-----------|-----------|-----------|-----------|------------|
| 342 | GOBP-CELLULAR-RESPONSE-TO-REACTIVE-OXYGEN-SPECIES | GO-0034614    | 7    | -0.213626 | -0.556955 | 0.958606  | 0.993755  | 1.000      |
| 343 | GOBP-NEGATIVE-REGULATION-OF-PHOSPHORUS-METABOL... | GO-0010563    | 9    | -0.209941 | -0.578375 | 0.962882  | 0.984608  | 1.000      |
| 344 | GOBP-RESPONSE-TO-INSULIN                          | GO-0032868    | 5    | -0.258670 | -0.582876 | 0.963855  | 0.984424  | 1.000      |
| 345 | GOBP-NEGATIVE-REGULATION-OF-PROTEOLYSIS           | GO-0045861    | 8    | -0.221846 | -0.594173 | 0.954048  | 0.979692  | 1.000      |
| 346 | GOBP-MUSCLE-CELL-DIFFERENTIATION                  | GO-0042692    | 10   | -0.206411 | -0.597244 | 0.928279  | 0.980259  | 1.000      |
| 347 | REACTOME-G-ALPHA-Q-SIGNALING-EVENTS               | R-RNO-416476  | 6    | -0.250671 | -0.602232 | 0.943633  | 0.979159  | 1.000      |
| 348 | GOBP-NEGATIVE-REGULATION-OF-SIGNALING             | GO-0023057    | 21   | -0.168192 | -0.603420 | 0.951965  | 0.980816  | 1.000      |
| 349 | GOBP-CELLULAR-RESPONSE-TO-INORGANIC-SUBSTANCE     | GO-0071241    | 11   | -0.207337 | -0.608424 | 0.936403  | 0.979745  | 1.000      |
| 350 | GOBP-REGULATION-OF-PROTEIN-CATABOLIC-PROCESS      | GO-0042176    | 7    | -0.234568 | -0.611932 | 0.926829  | 0.979685  | 1.000      |
| 351 | GOBP-POSITIVE-REGULATION-OF-NEURON-PROJECTION...  | GO-0010976    | 5    | -0.277108 | -0.612155 | 0.933472  | 0.982158  | 1.000      |
| 352 | REACTOME-RNA-POLYMERASE-II-TRANSCRIPTION          | R-RNO-73857   | 20   | -0.174087 | -0.612674 | 0.931818  | 0.984429  | 1.000      |
| 353 | GOBP-RESPONSE-TO-STARVATION                       | GO-0042594    | 5    | -0.279034 | -0.620718 | 0.919840  | 0.980280  | 1.000      |
| 354 | GOBP-ENDOMEMBRANE-SYSTEM-ORGANIZATION             | GO-0010256    | 6    | -0.264239 | -0.623202 | 0.929936  | 0.980791  | 1.000      |
| 355 | GOBP-NEGATIVE-REGULATION-OF-CATABOLIC-PROCESS     | GO-0009895    | 8    | -0.237500 | -0.625109 | 0.880478  | 0.981720  | 1.000      |
| 356 | GOBP-CELLULAR-RESPONSE-TO-STARVATION              | GO-0009267    | 5    | -0.279034 | -0.626345 | 0.910256  | 0.983227  | 1.000      |
| 357 | GOBP-ERBB-SIGNALING-PATHWAY                       | GO-0038127    | 5    | -0.282080 | -0.645640 | 0.904471  | 0.967977  | 1.000      |
| 358 | GOBP-POSITIVE-REGULATION-OF-TRANSMEMBRANE-TRAN... | GO-0034764    | 7    | -0.252738 | -0.649519 | 0.909474  | 0.966782  | 1.000      |
| 359 | GOBP-IN-UTERO-EMBRYONIC-DEVELOPMENT               | GO-0001701    | 8    | -0.245971 | -0.650473 | 0.897796  | 0.968449  | 1.000      |
| 360 | GOBP-POSITIVE-REGULATION-OF-BINDING               | GO-0051099    | 6    | -0.269324 | -0.654575 | 0.884368  | 0.966870  | 1.000      |
| 361 | GOBP-AGING                                        | GO-0007568    | 13   | -0.208250 | -0.654924 | 0.887202  | 0.969244  | 1.000      |
| 362 | GOBP-MATERNAL-PROCESS-INVOLVED-IN-FEMALE-PREGN... | GO-0060135    | 5    | -0.199408 | -0.658233 | 0.888000  | 0.968572  | 1.000      |
| 363 | GOBP-REPRODUCTION                                 | GO-0000003    | 18   | -0.192079 | -0.660973 | 0.902954  | 0.968215  | 1.000      |
| 364 | REACTOME-SENESCENCE-ASSOCIATED-SECRETORY-PHENO... | R-RNO-2559582 | 6    | -0.285057 | -0.672682 | 0.854911  | 0.957863  | 1.000      |
| 365 | REACTOME-CELLULAR-SENESCENCE                      | R-RNO-2559583 | 6    | -0.285057 | -0.679519 | 0.858012  | 0.952438  | 1.000      |
| 366 | GOBP-NEGATIVE-REGULATION-OF-CYSTEINE-TYPE-ENDO... | GO-2000117    | 38   | -0.168442 | -0.682399 | 0.884536  | 0.951614  | 1.000      |
| 367 | GOBP-NERVOUS-SYSTEM-PROCESS                       | GO-0050877    | 38   | -0.168442 | -0.682399 | 0.900222  | 0.947851  | 1.000      |
| 368 | GOBP-REGULATION-OF-BODY-FLUID-LEVELS              | GO-0050878    | 11   | -0.232167 | -0.692414 | 0.855422  | 0.944853  | 1.000      |
| 369 | GOBP-REPRODUCTIVE-SYSTEM-DEVELOPMENT              | GO-0061458    | 6    | -0.297362 | -0.702570 | 0.836401  | 0.934618  | 1.000      |
| 370 | GOBP-NEGATIVE-REGULATION-OF-PEPTIDASE-ACTIVITY    | GO-0010466    | 6    | -0.294806 | -0.702609 | 0.845188  | 0.937247  | 1.000      |
| 371 | GOBP-POSITIVE-REGULATION-OF-TRANSPORT             | GO-0051050    | 26   | -0.189778 | -0.705069 | 0.877419  | 0.936640  | 1.000      |
| 372 | GOBP-REGULATION-OF-RECEPTOR-MEDIATED-ENDOCYTOSIS  | GO-0048259    | 5    | -0.313253 | -0.706368 | 0.845098  | 0.937608  | 1.000      |
| 373 | GOBP-POSITIVE-REGULATION-OF-PROTEIN-METABOLIC...  | GO-0051247    | 28   | -0.188501 | -0.706767 | 0.856566  | 0.939750  | 1.000      |
| 374 | GOBP-MULTI-ORGANISM-PROCESS                       | GO-0051704    | 16   | -0.212949 | -0.709658 | 0.810526  | 0.938615  | 1.000      |
| 375 | GOBP-RECEPTOR-INTERNALIZATION                     | GO-0031623    | 5    | -0.313253 | -0.710046 | 0.816284  | 0.940840  | 1.000      |
| 376 | GOBP-CELL-JUNCTION-ORGANIZATION                   | GO-0034330    | 19   | -0.202071 | -0.711488 | 0.853763  | 0.941722  | 1.000      |
| 377 | GOBP-RAS-PROTEIN-SIGNAL-TRANSDUCTION              | GO-0007265    | 5    | -0.321382 | -0.711882 | 0.820866  | 0.943860  | 1.000      |
| 378 | GOBP-NEGATIVE-REGULATION-OF-TRANSCRIPTION-BY-R... | GO-0000122    | 10   | -0.245314 | -0.711927 | 0.841365  | 0.946566  | 1.000      |
| 379 | GOBP-SECRETION                                    | GO-0046903    | 24   | -0.245314 | -0.717904 | 0.871397  | 0.941127  | 1.000      |
| 380 | GOBP-RECEPTOR-METABOLIC-PROCESS                   | GO-0043112    | 5    | -0.313253 | -0.720599 | 0.817814  | 0.940374  | 1.000      |
| 381 | GOBP-REGULATION-OF-PHOSPHORUS-METABOLIC-PROCESS   | GO-0005174    | 27   | -0.189590 | -0.721419 | 0.852083  | 0.941932  | 1.000      |
| 382 | GOBP-RESPONSE-TO-INTERLEUKIN-1                    | GO-0070555    | 5    | -0.324362 | -0.722393 | 0.820202  | 0.943300  | 1.000      |
| 383 | GOBP-REGULATION-OF-PROTEIN-MODIFICATION-PROCESS   | GO-0031399    | 29   | -0.184554 | -0.723281 | 0.838565  | 0.944847  | 1.000      |
| 384 | REACTOME-TRANSCRIPTIONAL-REGULATION-OF-WHITE-A... | R-RNO-381340  | 6    | -0.301403 | -0.724765 | 0.819473  | 0.945415  | 1.000      |

Continuation of Table S12

| NAME | ID                                                | SIZE          | ES        | NES       | NOM.p.val | FDR.q.val | FWER.p.val |
|------|---------------------------------------------------|---------------|-----------|-----------|-----------|-----------|------------|
| 385  | GOBP-NEGATIVE-REGULATION-OF-ANION-TRANSPORT       | 8             | -0.270102 | -0.734156 | 0.797040  | 0.934775  | 1.000      |
| 386  | GOBP-DNA-METABOLIC-PROCESS                        | 6             | -0.301284 | -0.734569 | 0.831622  | 0.936849  | 1.000      |
| 387  | GOBP-CYTOKINE-MEDIATED-SIGNALING-PATHWAY          | 16            | -0.229538 | -0.742451 | 0.807440  | 0.927766  | 1.000      |
| 388  | GOBP-POSITIVE-REGULATION-OF-ION-TRANSPORT         | 17            | -0.216652 | -0.742717 | 0.801282  | 0.930198  | 1.000      |
| 389  | GOBP-POSITIVE-REGULATION-OF-TRANSPERASE-ACTIVITY  | 20            | -0.208386 | -0.743377 | 0.829374  | 0.931964  | 1.000      |
| 390  | GOBP-POSITIVE-REGULATION-OF-PROTEIN-KINASE-ACT... | 19            | -0.216495 | -0.744362 | 0.812641  | 0.933228  | 1.000      |
| 391  | GOBP-PROTEIN-MODIFICATION-BY-SMALL-PROTEIN-CON... | 6             | -0.308346 | -0.750415 | 0.746362  | 0.926497  | 1.000      |
| 392  | GOBP-REGULATION-OF-PROTEIN-PHOSPHORYLATION        | 26            | -0.198132 | -0.751383 | 0.806981  | 0.927796  | 1.000      |
| 393  | GOBP-REGULATION-OF-CATABOLIC-PROCESS              | 13            | -0.236574 | -0.754200 | 0.790456  | 0.926377  | 1.000      |
| 394  | GOBP-REGULATION-OF-SYNAPSE-STRUCTURE-OR-ACTIVITY  | 11            | -0.258287 | -0.755567 | 0.781457  | 0.927117  | 1.000      |
| 395  | GOBP-RECEPTOR-MEDIATED-ENDOCYTOSIS                | 6             | -0.317073 | -0.757030 | 0.755144  | 0.927644  | 1.000      |
| 396  | GOBP-EPITHELIAL-CELL-DIFFERENTIATION              | 7             | -0.293164 | -0.757752 | 0.746753  | 0.929292  | 1.000      |
| 397  | GOBP-TRANSMEMBRANE-RECEPTOR-PROTEIN-TYROSINE-K... | 19            | -0.220571 | -0.767063 | 0.804721  | 0.917088  | 1.000      |
| 398  | GOBP-SENSORY-ORGAN-DEVELOPMENT                    | 8             | -0.285768 | -0.772060 | 0.762575  | 0.911530  | 1.000      |
| 399  | GOBP-POSITIVE-REGULATION-OF-GROWTH                | 9             | -0.285464 | -0.780914 | 0.758763  | 0.899665  | 1.000      |
| 400  | GOBP-STRIATED-MUSCLE-CELL-DIFFERENTIATION         | 9             | -0.283263 | -0.781312 | 0.730435  | 0.901885  | 1.000      |
| 401  | GOBP-REGULATION-OF-APOPTOTIC-SIGNALING-PATHWAY    | 10            | -0.270555 | -0.785243 | 0.726115  | 0.898120  | 1.000      |
| 402  | GOBP-REGULATION-OF-HORMONE-LEVELS                 | 12            | -0.259475 | -0.786651 | 0.750552  | 0.898658  | 1.000      |
| 403  | GOBP-FC-EPSILON-RECEPTOR-SIGNALING-PATHWAY        | 7             | -0.308626 | -0.787454 | 0.734440  | 0.900117  | 1.000      |
| 404  | GOBP-ACTIVATION-OF-PROTEIN-KINASE-ACTIVITY        | 11            | -0.268280 | -0.788453 | 0.725051  | 0.901213  | 1.000      |
| 405  | REACTOME-FC-EPSILON-RECEPTOR-FCERL-SIGNALING      | R-RNO-2454202 | -0.308626 | -0.793560 | 0.700405  | 0.895308  | 1.000      |
| 406  | GOBP-GLUCOSE-METABOLIC-PROCESS                    | 6             | -0.335856 | -0.795741 | 0.710145  | 0.894369  | 1.000      |
| 407  | GOBP-GROWTH                                       | 14            | -0.246004 | -0.797152 | 0.737705  | 0.894606  | 1.000      |
| 408  | GOBP-MONOSACCHARIDE-METABOLIC-PROCESS             | 6             | -0.335856 | -0.799464 | 0.696703  | 0.893437  | 1.000      |
| 409  | GOBP-ANATOMICAL-STRUCTURE-HOMEOSTASIS             | 7             | -0.314748 | -0.805320 | 0.706114  | 0.886145  | 1.000      |
| 410  | GOBP-CELL-CELL-JUNCTION-ASSEMBLY                  | 5             | -0.358965 | -0.816731 | 0.688985  | 0.869493  | 1.000      |
| 411  | GOBP-RESPONSE-TO-CYTOKINE                         | 23            | -0.225677 | -0.817631 | 0.723077  | 0.870743  | 1.000      |
| 412  | GOBP-CYTOKINE-PRODUCTION                          | 10            | -0.291006 | -0.821314 | 0.683406  | 0.867254  | 1.000      |
| 413  | GOBP-RESPONSE-TO-CALCIUMION                       | 6             | -0.345653 | -0.821789 | 0.671610  | 0.869237  | 1.000      |
| 414  | GOBP-PROTEIN-PHOSPHORYLATION                      | 34            | -0.205306 | -0.823090 | 0.728051  | 0.869606  | 1.000      |
| 415  | GOBP-EMBRYO-DEVELOPMENT-ENDING-IN-BIRTH-OR-EGG... | 9             | -0.304509 | -0.827766 | 0.654167  | 0.864222  | 1.000      |
| 416  | GOBP-PROTEIN-LOCALIZATION-TO-ORGANELLE            | 9             | -0.300453 | -0.828968 | 0.678005  | 0.864973  | 1.000      |
| 417  | GOBP-ANION-TRANSMEMBRANE-TRANSPORT                | 7             | -0.324898 | -0.829963 | 0.677485  | 0.866037  | 1.000      |
| 418  | REACTOME-SIGNALING-BY-INTERLEUKINS                | R-RNO-449147  | -0.264002 | -0.831652 | 0.687631  | 0.865939  | 1.000      |
| 419  | GOBP-NEGATIVE-REGULATION-OF-RESPONSE_TO_STIMULUS  | 16            | -0.255234 | -0.833663 | 0.681917  | 0.865198  | 1.000      |
| 420  | GOBP-INFLAMMATORY-RESPONSE                        | 12            | -0.270697 | -0.835236 | 0.665975  | 0.865216  | 1.000      |
| 421  | GOBP-REGULATION-OF-PROTEIN-SERINE-THREONINE-KI... | 12            | -0.270946 | -0.836699 | 0.658281  | 0.865487  | 1.000      |
| 422  | GOBP-RESPONSE-TO-NUTRIENT                         | 5             | -0.369227 | -0.839967 | 0.615385  | 0.862237  | 1.000      |
| 423  | GOBP-POSITIVE-REGULATION-OF-CYTOKINE-PRODUCTION   | 7             | -0.337379 | -0.843292 | 0.630522  | 0.858849  | 1.000      |
| 424  | GOBP-CELLULAR-RESPONSE-TO-DNA-DAMAGE-STIMULUS     | 5             | -0.381317 | -0.844896 | 0.634888  | 0.858719  | 1.000      |
| 425  | GOBP-REGULATION-OF-TRANSMEMBRANE-TRANSPORT        | 23            | -0.229275 | -0.848327 | 0.688000  | 0.855293  | 1.000      |
| 426  | GOBP-CIRCULATORY-SYSTEM-PROCESS                   | 5             | -0.378825 | -0.856179 | 0.640177  | 0.843392  | 1.000      |
| 427  | REACTOME-EXTRA_NUCLEAR_ESTROGEN-SIGNALING         | R-RNO-9009391 | -0.327997 | -0.856661 | 0.637500  | 0.845514  | 1.000      |

Continuation of Table S12

|     | NAME                                              | ID            | SIZE | ES        | NES       | NOM.p.val | FDR.q.val | FWER.p.val |
|-----|---------------------------------------------------|---------------|------|-----------|-----------|-----------|-----------|------------|
| 428 | GOBP-RESPONSE.TO.EXTRACELLULAR-STIMULUS           | GO-0009991    | 13   | -0.270838 | -0.85729  | 0.657143  | 0.844451  | 1.000      |
| 429 | GOBP-MITOCHONDRION-ORGANIZATION                   | GO-0007005    | 7    | -0.341089 | -0.861891 | 0.590717  | 0.841679  | 1.000      |
| 430 | GOBP-HEAD-DEVELOPMENT                             | GO-0060322    | 22   | -0.240355 | -0.864015 | 0.665948  | 0.840813  | 1.000      |
| 431 | GOBP-REGULATION.OF.NEURON-DIFFERENTIATION         | GO-0045664    | 5    | -0.388307 | -0.872358 | 0.587992  | 0.828038  | 1.000      |
| 432 | REACTOME-ESR-MEDIATED-SIGNALING                   | R-RNO-8939211 | 8    | -0.338501 | -0.872965 | 0.610638  | 0.829632  | 1.000      |
| 433 | GOBP-REGULATION.OF.PHOSPHOLIPASE-ACTIVITY         | GO-0010517    | 6    | -0.366609 | -0.875161 | 0.589011  | 0.828298  | 1.000      |
| 434 | GOBP-TRANSMEMBRANE-RECEPTOR-PROTEIN-SERINE-THR... | GO-0007178    | 6    | -0.366676 | -0.880524 | 0.573171  | 0.821016  | 1.000      |
| 435 | GOBP-REGULATION.OF-ANION-TRANSPORT                | GO-0044070    | 20   | -0.250368 | -0.881046 | 0.614583  | 0.822922  | 1.000      |
| 436 | GOBP-NEUROINFLAMMATORY-RESPONSE                   | GO-0150076    | 5    | -0.406765 | -0.885663 | 0.592593  | 0.817032  | 1.000      |
| 437 | GOBP-BEHAVIOR                                     | GO-0007610    | 32   | -0.228647 | -0.888361 | 0.649462  | 0.814760  | 1.000      |
| 438 | GOBP-NEGATIVE-REGULATION.OF-BIOSYNTHETIC-PROCESS  | GO-0009890    | 13   | -0.288633 | -0.889027 | 0.616667  | 0.816342  | 1.000      |
| 439 | GOBP-REGULATION.OF-RESPONSE.TO-STRESS             | GO-0080134    | 19   | -0.254154 | -0.889199 | 0.621444  | 0.818915  | 1.000      |
| 440 | REACTOME-PTEN-REGULATION                          | R-RNO-6807070 | 5    | -0.394737 | -0.891453 | 0.573441  | 0.817562  | 1.000      |
| 441 | GOBP-REGULATION.OF-LIPASE-ACTIVITY                | GO-0060191    | 6    | -0.366609 | -0.892741 | 0.602851  | 0.818033  | 1.000      |
| 442 | GOBP-EXTRINSIC-APOPTOTIC-SIGNALING-PATHWAY        | GO-0097191    | 7    | -0.349639 | -0.896040 | 0.576763  | 0.814410  | 1.000      |
| 443 | GOBP-POSITIVE-REGULATION.OF-PHOSPHORUS-METABOL... | GO-0010562    | 24   | -0.245896 | -0.903667 | 0.599129  | 0.802835  | 1.000      |
| 444 | GOBP-EMBRYO-DEVELOPMENT                           | GO-0009790    | 14   | -0.282021 | -0.904685 | 0.588595  | 0.803546  | 1.000      |
| 445 | REACTOME-SIGNALING-BY-NUCLEAR-RECEPTORS           | R-RNO-9006931 | 8    | -0.338501 | -0.904953 | 0.548902  | 0.806065  | 1.000      |
| 446 | GOBP-NEGATIVE-REGULATION.OF-NEURON-DEATH          | GO-1901215    | 11   | -0.311375 | -0.909173 | 0.559748  | 0.800613  | 1.000      |
| 447 | GOBP-NEURON-PROJECTION-GUIDANCE                   | GO-0097485    | 9    | -0.330302 | -0.910156 | 0.561122  | 0.801634  | 1.000      |
| 448 | GOBP-REGULATION.OF-INFLAMMATORY-RESPONSE          | GO-0050727    | 7    | -0.363485 | -0.913370 | 0.532328  | 0.798312  | 1.000      |
| 449 | GOBP-REGULATION.OF-INTRACELLULAR-SIGNAL-TRANSD... | GO-1902531    | 21   | -0.254182 | -0.914834 | 0.591880  | 0.798571  | 1.000      |
| 450 | GOBP-REGULATION.OF-DEVELOPMENTAL-GROWTH           | GO-0048638    | 9    | -0.333629 | -0.919956 | 0.552521  | 0.791288  | 1.000      |
| 451 | GOBP-REGULATION.OF-CELLULAR-CATABOLIC-PROCESS     | GO-0031329    | 10   | -0.323984 | -0.920713 | 0.537500  | 0.792908  | 1.000      |
| 452 | GOBP-RESPONSE.TO-TEMPERATURE-STIMULUS             | GO-0009266    | 9    | -0.329560 | -0.922647 | 0.560729  | 0.791843  | 1.000      |
| 453 | GOBP-SECOND-MESSENGER-MEDIATED-SIGNALING          | GO-0019932    | 16   | -0.283695 | -0.923255 | 0.570281  | 0.793607  | 1.000      |
| 454 | GOBP-NEGATIVE-REGULATION.OF-APOPTOTIC-SIGNALIN... | GO-2001234    | 7    | -0.355149 | -0.923526 | 0.544330  | 0.796167  | 1.000      |
| 455 | GOBP-RESPONSE.TO-BIOTIC-STIMULUS                  | GO-0009607    | 17   | -0.269934 | -0.923730 | 0.553015  | 0.798786  | 1.000      |
| 456 | GOBP-CELLULAR-RESPONSE.TO-EXTERNAL-STIMULUS       | GO-0071496    | 10   | -0.321061 | -0.926882 | 0.527668  | 0.795473  | 1.000      |
| 457 | GOBP-POSITIVE-REGULATION.OF-PROTEIN-PHOSPHORYL... | GO-0001934    | 23   | -0.254269 | -0.929932 | 0.547672  | 0.792449  | 1.000      |
| 458 | GOBP-POSITIVE-REGULATION.OF-ENDOTHELIAL-CELL-P... | GO-0001938    | 6    | -0.392052 | -0.932804 | 0.536481  | 0.789779  | 1.000      |
| 459 | GOBP-POSITIVE-REGULATION.OF-RESPONSE.TO-EXTERN... | GO-0032103    | 9    | -0.340538 | -0.934166 | 0.517103  | 0.790093  | 1.000      |
| 460 | GOBP-REGULATION.OF-DEFENSE-RESPONSE               | GO-0031347    | 7    | -0.363485 | -0.934217 | 0.518518  | 0.793053  | 1.000      |
| 461 | GOBP-POSITIVE-REGULATION.OF-PROTEIN-MODIFICATI... | GO-0031401    | 23   | -0.254269 | -0.935823 | 0.545249  | 0.793057  | 1.000      |
| 462 | GOBP-REGULATION.OF-SECRETION                      | GO-0051046    | 14   | -0.290654 | -0.937945 | 0.515789  | 0.792118  | 1.000      |
| 463 | REACTOME-ESTROGEN-DEPENDENT-NUCLEAR-EVENTS-DOW... | R-RNO-9634638 | 5    | -0.422580 | -0.940690 | 0.501976  | 0.789525  | 1.000      |
| 464 | GOBP-PROTEIN-AUTOPHOSPHORYLATION                  | GO-0046777    | 5    | -0.427721 | -0.942062 | 0.516807  | 0.789606  | 1.000      |
| 465 | GOBP-POSITIVE-REGULATION.OF-ANION-TRANSPORT       | GO-1903793    | 9    | -0.339402 | -0.943960 | 0.506383  | 0.788921  | 1.000      |
| 466 | GOBP-REGULATION.OF-ANION-TRANSMEMBRANE-TRANSPORT  | GO-1903959    | 5    | -0.433974 | -0.944357 | 0.494759  | 0.791342  | 1.000      |
| 467 | GOBP-NEGATIVE-REGULATION.OF-IMMUNE-SYSTEM-PROCESS | GO-0002683    | 5    | -0.416878 | -0.944591 | 0.510000  | 0.794030  | 1.000      |
| 468 | GOBP-MULTICELLULAR-ORGANISMAL-RESPONSE.TO-STRESS  | GO-0033555    | 5    | -0.418725 | -0.948150 | 0.490196  | 0.790156  | 1.000      |
| 469 | GOBP-MULTICELLULAR-ORGANISM-PROCESS               | GO-0044706    | 8    | -0.356735 | -0.950113 | 0.519669  | 0.789266  | 1.000      |
| 470 | REACTOME-SIGNALING-BY-NTRK2-TRKB                  | R-RNO-9006115 | 6    | -0.397650 | -0.953251 | 0.480851  | 0.781583  | 1.000      |



Continuation of Table S12

|     | NAME                                              | ID            | SIZE | ES        | NES       | NOM.p.val | FDR.q.val | FWER.p.val |
|-----|---------------------------------------------------|---------------|------|-----------|-----------|-----------|-----------|------------|
| 471 | GOBP-RESPONSE-TO-BACTERIUM                        | GO-0009617    | 13   | -0.305742 | -0.956488 | 0.468619  | 0.782260  | 1.000      |
| 472 | GOBP-TUBE-DEVELOPMENT                             | GO-0035295    | 18   | -0.288885 | -0.957790 | 0.537209  | 0.782733  | 1.000      |
| 473 | GOBP-APOPTOTIC-SIGNALING-PATHWAY                  | GO-0097190    | 15   | -0.295560 | -0.961525 | 0.480885  | 0.778411  | 1.000      |
| 474 | GOBP-REGULATION-OF-NERVOUS-SYSTEM-PROCESS         | GO-0031644    | 8    | -0.362500 | -0.964128 | 0.515030  | 0.776098  | 1.000      |
| 475 | GOBP-RESPONSE-TO-MOLECULE-OF-BACTERIAL-ORIGIN     | GO-0002237    | 13   | -0.305742 | -0.964169 | 0.492569  | 0.779182  | 1.000      |
| 476 | GOBP-DEPHOSPHORYLATION                            | GO-0016311    | 7    | -0.386051 | -0.965168 | 0.494071  | 0.780208  | 1.000      |
| 477 | GOBP-NEGATIVE-REGULATION-OF-GENE-EXPRESSION       | GO-0010629    | 12   | -0.318014 | -0.965273 | 0.491262  | 0.783182  | 1.000      |
| 478 | GOBP-RESPONSE-TO-NITROGEN-COMPOUND                | GO-1901698    | 34   | -0.238680 | -0.965556 | 0.515528  | 0.785829  | 1.000      |
| 479 | GOBP-NEGATIVE-REGULATION-OF-TRANSPORT             | GO-0051051    | 13   | -0.305741 | -0.966728 | 0.508097  | 0.786711  | 1.000      |
| 480 | GOBP-PROTEIN-DEPHOSPHORYLATION                    | GO-0006470    | 7    | -0.386051 | -0.974787 | 0.483193  | 0.772767  | 1.000      |
| 481 | GOBP-CALCIUM-MEDIATED-SIGNALING                   | GO-0019722    | 10   | -0.339575 | -0.975222 | 0.461009  | 0.775091  | 1.000      |
| 482 | GOBP-POSITIVE-REGULATION-OF-SMALL-MOLECULE-MET... | GO-0062013    | 5    | -0.442234 | -0.979207 | 0.460922  | 0.769641  | 1.000      |
| 483 | GOBP-REGULATION-OF-CELLULAR-AMIDE-METABOLIC-PR... | GO-0034248    | 9    | -0.349749 | -0.982392 | 0.482546  | 0.766080  | 1.000      |
| 484 | GOBP-PEPTIDYL-LYSINE-MODIFICATION                 | GO-0018205    | 5    | -0.437258 | -0.984175 | 0.457023  | 0.765644  | 1.000      |
| 485 | GOBP-NEURON-MIGRATION                             | GO-0001764    | 5    | -0.446074 | -0.984552 | 0.458599  | 0.768061  | 1.000      |
| 486 | REACTOME-SIGNALING-BY-RHO-GTPASES-MIRO-GTPASES... | R-RNO-9716542 | 9    | -0.361939 | -0.984646 | 0.462185  | 0.771139  | 1.000      |
| 487 | GOBP-POSITIVE-REGULATION-OF-NERVOUS-SYSTEM-DEV... | GO-0051962    | 12   | -0.327832 | -0.985401 | 0.471338  | 0.772930  | 1.000      |
| 488 | GOBP-REGULATION-OF-CELL-CYCLE                     | GO-0051726    | 13   | -0.314983 | -0.990465 | 0.472917  | 0.765862  | 1.000      |
| 489 | GOBP-NERVE-DEVELOPMENT                            | GO-0021675    | 9    | -0.357722 | -0.990604 | 0.469828  | 0.768935  | 1.000      |
| 490 | GOBP-MUSCLE-CONTRACTION                           | GO-0006936    | 5    | -0.443507 | -0.990908 | 0.432203  | 0.771607  | 1.000      |
| 491 | GOBP-CENTRAL-NERVOUS-SYSTEM-DEVELOPMENT           | GO-0007417    | 26   | -0.262922 | -0.995004 | 0.452915  | 0.766192  | 1.000      |
| 492 | REACTOME-RHO-GTPASE-EFFECTORS                     | R-RNO-195258  | 9    | -0.361939 | -0.995536 | 0.466258  | 0.768398  | 1.000      |
| 493 | GOBP-FOREBRAIN-DEVELOPMENT                        | GO-0030900    | 9    | -0.360003 | -0.995656 | 0.442797  | 0.771578  | 1.000      |
| 494 | GOBP-NEGATIVE-REGULATION-OF-ION-TRANSPORT         | GO-0043271    | 11   | -0.332248 | -1.003890 | 0.448578  | 0.757417  | 1.000      |
| 495 | GOBP-APOPTOTIC-MITOCHONDRIAL-CHANGES              | GO-0008637    | 6    | -0.418457 | -1.004043 | 0.448413  | 0.760487  | 1.000      |
| 496 | GOBP-POSITIVE-REGULATION-OF-CELL-DEVELOPMENT      | GO-0010720    | 12   | -0.327832 | -1.004247 | 0.427686  | 0.763535  | 1.000      |
| 497 | GOBP-POSITIVE-REGULATION-OF-NEUROGENESIS          | GO-0050769    | 12   | -0.327832 | -1.008814 | 0.463675  | 0.757201  | 1.000      |
| 498 | GOBP-REGULATION-OF-FAT-CELL-DIFFERENTIATION       | GO-0045598    | 6    | -0.422965 | -1.009266 | 0.433684  | 0.759644  | 1.000      |
| 499 | GOBP-GLAND-DEVELOPMENT                            | GO-0048732    | 7    | -0.410313 | -1.013658 | 0.441118  | 0.753776  | 1.000      |
| 500 | GOBP-REGULATION-OF-PROTEIN-LOCALIZATION           | GO-0032880    | 18   | -0.294564 | -1.015817 | 0.434599  | 0.752548  | 1.000      |
| 501 | GOBP-TUBE-MORPHOGENESIS                           | GO-0035239    | 15   | -0.319601 | -1.018500 | 0.417391  | 0.750149  | 1.000      |
| 502 | GOBP-POSTTRANSCRIPTIONAL-REGULATION-OF-GENE-EX... | GO-0010608    | 8    | -0.377077 | -1.023671 | 0.431250  | 0.742483  | 1.000      |
| 503 | GOBP-REGULATION-OF-PHOSPHOLIPASE-C-ACTIVITY       | GO-1900274    | 5    | -0.469837 | -1.024230 | 0.405010  | 0.744666  | 1.000      |
| 504 | GOBP-NEGATIVE-REGULATION-OF-CELL-PROJECTION-OR... | GO-0031345    | 5    | -0.459349 | -1.027290 | 0.415800  | 0.741512  | 1.000      |
| 505 | GOBP-ENZYME-LINKED-RECEPTOR-PROTEIN-SIGNALING-... | GO-0007167    | 24   | -0.282056 | -1.033670 | 0.405738  | 0.731122  | 1.000      |
| 506 | GOBP-POSITIVE-REGULATION-OF-LIPASE-ACTIVITY       | GO-0060193    | 5    | -0.469837 | -1.034701 | 0.418327  | 0.732352  | 1.000      |
| 507 | GOBP-GLIOGENESIS                                  | GO-0042063    | 12   | -0.344391 | -1.038106 | 0.404711  | 0.728380  | 1.000      |
| 508 | GOBP-REGULATION-OF-ENDOCYTOSIS                    | GO-0030100    | 6    | -0.432507 | -1.042375 | 0.390756  | 0.722614  | 1.000      |
| 509 | GOBP-CELL-JUNCTION-ASSEMBLY                       | GO-0034329    | 8    | -0.393436 | -1.045495 | 0.382883  | 0.719494  | 1.000      |
| 510 | GOBP-RHYTHMIC-PROCESS                             | GO-0048511    | 15   | -0.325814 | -1.051108 | 0.371795  | 0.710839  | 1.000      |
| 511 | GOBP-REGULATION-OF-EXTRINSIC-APOPTOTIC-SIGNALI... | GO-2001236    | 6    | -0.440920 | -1.060859 | 0.367220  | 0.694258  | 1.000      |
| 512 | GOBP-AMEBOIDAL-TYPE-CELL-MIGRATION                | GO-0001667    | 11   | -0.358920 | -1.070693 | 0.332645  | 0.677125  | 1.000      |
| 513 | GOBP-CELL-CELL-ADHESION                           | GO-0098609    | 14   | -0.333064 | -1.072490 | 0.352818  | 0.676714  | 1.000      |

Continuation of Table S12

|     | NAME                                              | ID            | SIZE | ES        | NES       | NOM.p.val | FDR.q.val | FWER.p.val |
|-----|---------------------------------------------------|---------------|------|-----------|-----------|-----------|-----------|------------|
| 514 | REACTOME_HEMOSTASIS                               | R-RNO-109582  | 14   | -0.340238 | -1.072648 | 0.341253  | 0.679734  | 1.000      |
| 515 | GOBP_CELLULAR_RESPONSE_TO_CADMIUM_ION             | GO-0071276    | 5    | -0.476646 | -1.073487 | 0.341948  | 0.681347  | 1.000      |
| 516 | GOBP_COGNITION                                    | GO-0050890    | 28   | -0.277684 | -1.074058 | 0.369803  | 0.683485  | 1.000      |
| 517 | GOBP_RESPONSE_TO_NERVE_GROWTH_FACTOR              | GO-1990089    | 7    | -0.416604 | -1.074307 | 0.351410  | 0.686446  | 1.000      |
| 518 | GOBP_POSITIVE_REGULATION_OF_DEVELOPMENTAL_GROWTH  | GO-0048639    | 8    | -0.405376 | -1.075322 | 0.349398  | 0.687802  | 1.000      |
| 519 | REACTOME_CELL_CYCLE_MITOTIC                       | R-RNO-69278   | 5    | -0.481637 | -1.080460 | 0.354077  | 0.680278  | 1.000      |
| 520 | HALLMARK_ALLOGRAFT_REJECTION                      | M5950         | 7    | -0.420106 | -1.081981 | 0.354701  | 0.680350  | 1.000      |
| 521 | GOBP_BIOLOGICAL_ADHESION                          | GO-0022610    | 19   | -0.308902 | -1.082776 | 0.334719  | 0.682193  | 1.000      |
| 522 | GOBP_MAPK_CASCADE                                 | GO-0000165    | 18   | -0.319594 | -1.097376 | 0.336000  | 0.654962  | 1.000      |
| 523 | GOBP_NEUROTROPHIN_TRK_RECEPTOR_SIGNALING_PATHWAY  | GO-0048011    | 6    | -0.469326 | -1.098035 | 0.348837  | 0.656868  | 1.000      |
| 524 | GOBP_CELL_CYCLE                                   | GO-0007049    | 21   | -0.313180 | -1.101047 | 0.334021  | 0.653889  | 1.000      |
| 525 | GOBP_RESPONSE_TO_CADMIUM_ION                      | GO-0046686    | 6    | -0.451277 | -1.102935 | 0.324544  | 0.653196  | 1.000      |
| 526 | GOBP_NEUROTROPHIN_SIGNALING_PATHWAY               | GO-0038179    | 6    | -0.469326 | -1.105882 | 0.319920  | 0.650732  | 1.000      |
| 527 | GOBP_INTRACELLULAR_PROTEIN_TRANSPORT              | GO-0006886    | 9    | -0.401980 | -1.106531 | 0.304979  | 0.652766  | 1.000      |
| 528 | GOBP_INTRACELLULAR_TRANSPORT                      | GO-0046907    | 11   | -0.370596 | -1.109246 | 0.314465  | 0.650503  | 1.000      |
| 529 | GOBP_POSITIVE_REGULATION_OF_IMMUNE_SYSTEM_PROCESS | GO-0002684    | 18   | -0.319970 | -1.114180 | 0.329140  | 0.643943  | 1.000      |
| 530 | GOBP_SMALL_GTPASE_MEDIATED_SIGNAL_TRANSDUCTION    | GO-0007264    | 8    | -0.419915 | -1.117525 | 0.311850  | 0.640153  | 1.000      |
| 531 | GOBP_REGULATION_OF_VESICLE_MEDIATED_TRANSPORT     | GO-0060627    | 12   | -0.368537 | -1.120440 | 0.313853  | 0.637676  | 1.000      |
| 532 | GOBP_GLIAL_CELL_DIFFERENTIATION                   | GO-0010001    | 10   | -0.384941 | -1.123095 | 0.295359  | 0.635543  | 1.000      |
| 533 | GOBP_POSITIVE_REGULATION_OF_GENE_EXPRESSION       | GO-0010628    | 16   | -0.335354 | -1.127036 | 0.304255  | 0.630940  | 1.000      |
| 534 | GOBP_DEVELOPMENTAL_GROWTH                         | GO-0048589    | 10   | -0.393514 | -1.128503 | 0.308642  | 0.631287  | 1.000      |
| 535 | GOBP_APOPTOTIC_PROCESS                            | GO-0006915    | 35   | -0.283163 | -1.133320 | 0.282328  | 0.624915  | 1.000      |
| 536 | GOBP_NEGATIVE_REGULATION_OF_DEVELOPMENTAL_PROCESS | GO-0051093    | 13   | -0.368151 | -1.143135 | 0.268344  | 0.607482  | 1.000      |
| 537 | GOBP_TISSUE_MIGRATION                             | GO-0090130    | 9    | -0.419638 | -1.145282 | 0.296460  | 0.606683  | 1.000      |
| 538 | GOBP_REGULATION_OF_PROTEIN_STABILITY              | GO-0031647    | 5    | -0.498605 | -1.148561 | 0.276210  | 0.603212  | 1.000      |
| 539 | GOBP_POSITIVE_REGULATION_OF_PROTEIN_SERINE_THR... | GO-0071902    | 9    | -0.408232 | -1.152179 | 0.273834  | 0.599364  | 1.000      |
| 540 | GOBP_NEGATIVE_REGULATION_OF_NEURON_APOPTOTIC_P... | GO-0043524    | 8    | -0.447016 | -1.153905 | 0.275154  | 0.598805  | 1.000      |
| 541 | GOBP_COAGULATION                                  | GO-0050817    | 8    | -0.455158 | -1.160078 | 0.265351  | 0.590287  | 1.000      |
| 542 | GOBP_CYTOSKELETON_ORGANIZATION                    | GO-0007010    | 11   | -0.396997 | -1.160675 | 0.274059  | 0.592441  | 1.000      |
| 543 | GOBP_NEGATIVE_REGULATION_OF_CELL_DIFFERENTIATION  | GO-0045596    | 13   | -0.368151 | -1.161903 | 0.252796  | 0.593427  | 1.000      |
| 544 | REACTOME_SIGNALING_BY_WNT                         | R-RNO-195721  | 7    | -0.455899 | -1.167902 | 0.259958  | 0.585046  | 1.000      |
| 545 | GOBP_NEGATIVE_REGULATION_OF_CELLULAR_COMPONENT... | GO-0051129    | 11   | -0.392823 | -1.168719 | 0.260128  | 0.586714  | 1.000      |
| 546 | GOBP_REGULATION_OF_NERVOUS_SYSTEM_DEVELOPMENT     | GO-0051960    | 15   | -0.360378 | -1.171842 | 0.262821  | 0.583974  | 1.000      |
| 547 | REACTOME_TRANSCRIPTIONAL_REGULATION_BY_TP53       | R-RNO-3700989 | 6    | -0.496894 | -1.174781 | 0.279116  | 0.581606  | 1.000      |
| 548 | GOBP_ENDOCYTOSIS                                  | GO-0006897    | 8    | -0.445022 | -1.175419 | 0.269311  | 0.583694  | 1.000      |
| 549 | GOBP_SPROUTING_ANGIOGENESIS                       | GO-0002040    | 5    | -0.533935 | -1.176640 | 0.281720  | 0.584706  | 1.000      |
| 550 | GOBP_POSITIVE_REGULATION_OF_EPITHELIAL_CELL_PR... | GO-0050679    | 7    | -0.474771 | -1.178516 | 0.267241  | 0.584150  | 1.000      |
| 551 | GOBP_BLOOD_VESSEL_MORPHOGENESIS                   | GO-0048514    | 14   | -0.370220 | -1.180105 | 0.235294  | 0.584479  | 1.000      |
| 552 | GOBP_FAT_CELL_DIFFERENTIATION                     | GO-0045444    | 9    | -0.427304 | -1.180434 | 0.239837  | 0.587250  | 1.000      |
| 553 | GOBP_NEGATIVE_REGULATION_OF_TRANSMEMBRANE_TRAN... | GO-0034763    | 6    | -0.491642 | -1.183266 | 0.251037  | 0.584939  | 1.000      |
| 554 | GOBP_ORGAN_GROWTH                                 | GO-0035265    | 5    | -0.546573 | -1.188716 | 0.272366  | 0.577403  | 1.000      |
| 555 | GOBP_PROTEIN_KINASE_B_SIGNALING                   | GO-0043491    | 6    | -0.495492 | -1.191238 | 0.254620  | 0.576117  | 1.000      |
| 556 | GOBP_REGULATION_OF_LYMPHOCYTE_ACTIVATION          | GO-0051249    | 5    | -0.544297 | -1.197027 | 0.247917  | 0.568054  | 1.000      |

Continuation of Table S12

| NAME                                                  | ID           | SIZE | ES        | NES       | NOM.p.val | FDR.q.val | FWER.p.val |
|-------------------------------------------------------|--------------|------|-----------|-----------|-----------|-----------|------------|
| 557 GOBP-PLATELET-ACTIVATION                          | GO-0030168   | 6    | -0.504833 | -1.197210 | 0.245726  | 0.571165  | 1.000      |
| 558 GOBP-INSULIN-SECRETION                            | GO-0030073   | 7    | -0.475066 | -1.199055 | 0.235294  | 0.571310  | 1.000      |
| 559 GOBP-NEGATIVE-REGULATION-OF-NUCLEOBASE-CONTAIN... | GO-0045934   | 13   | -0.382797 | -1.202841 | 0.210526  | 0.566992  | 1.000      |
| 560 GOBP-EMBRYONIC-MORPHOGENESIS                      | GO-0048598   | 6    | -0.491263 | -1.207787 | 0.239754  | 0.560649  | 1.000      |
| 561 GOBP-HORMONE-TRANSPORT                            | GO-0009914   | 9    | -0.424347 | -1.210269 | 0.217822  | 0.559266  | 1.000      |
| 562 GOBP-BLOOD-VESSEL-ENDOTHELIAL-CELL-MIGRATION      | GO-0043534   | 8    | -0.453042 | -1.213456 | 0.245690  | 0.556420  | 1.000      |
| 563 GOBP-REGULATION-OF-PEPTIDYL-TYROSINE-PHOSPHORY... | GO-0050730   | 9    | -0.439054 | -1.215781 | 0.239175  | 0.555681  | 1.000      |
| 564 GOBP-PEPTIDYL-TYROSINE-MODIFICATION               | GO-0018212   | 10   | -0.419442 | -1.216641 | 0.204124  | 0.557402  | 1.000      |
| 565 GOBP-ENDOTHELIAL-CELL-MIGRATION                   | GO-0043542   | 8    | -0.453042 | -1.217064 | 0.220044  | 0.560197  | 1.000      |
| 566 GOBP-REGULATION-OF-MITOTIC-CELL-CYCLE             | GO-0007346   | 5    | -0.539917 | -1.218885 | 0.237903  | 0.559966  | 1.000      |
| 567 GOBP-INTRACELLULAR-RECEPTOR-SIGNALING-PATHWAY     | GO-0030522   | 5    | -0.552522 | -1.222920 | 0.239919  | 0.555663  | 1.000      |
| 568 GOBP-EMBRYONIC-ORGAN-DEVELOPMENT                  | GO-0048568   | 7    | -0.493073 | -1.227143 | 0.225610  | 0.551115  | 1.000      |
| 569 GOBP-RESPONSE-TO-ACID-CHEMICAL                    | GO-0001101   | 6    | -0.505889 | -1.232070 | 0.210421  | 0.544766  | 1.000      |
| 570 GOBP-HEART-DEVELOPMENT                            | GO-0007507   | 6    | -0.520285 | -1.232219 | 0.224101  | 0.548187  | 1.000      |
| 571 REACTOME-MAPK-TARGETS-NUCLEAR-EVENTS-MEDIATED...  | R-HSA-450282 | 5    | -0.561187 | -1.233441 | 0.231092  | 0.549400  | 1.000      |
| 572 GOBP-SKIN-DEVELOPMENT                             | GO-0043588   | 5    | -0.542083 | -1.238939 | 0.223195  | 0.542384  | 1.000      |
| 573 GOBP-POSITIVE-REGULATION-OF-LOCOMOTION            | GO-0040017   | 11   | -0.428609 | -1.239449 | 0.197959  | 0.545164  | 1.000      |
| 574 GOBP-REGULATION-OF-IMMUNE-SYSTEM-PROCESS          | GO-0002682   | 21   | -0.344463 | -1.240053 | 0.169133  | 0.547757  | 1.000      |
| 575 GOBP-REGULATION-OF-SYSTEM-PROCESS                 | GO-0044057   | 18   | -0.365548 | -1.240926 | 0.200846  | 0.549736  | 1.000      |
| 576 GOBP-REGULATION-OF-CYTOSKELETON-ORGANIZATION      | GO-0051493   | 5    | -0.554605 | -1.240950 | 0.217391  | 0.553548  | 1.000      |
| 577 GOBP-CARDIAC-MUSCLE-TISSUE-DEVELOPMENT            | GO-0048738   | 6    | -0.520285 | -1.243663 | 0.200418  | 0.551720  | 1.000      |
| 578 GOBP-POSITIVE-REGULATION-OF-PEPTIDYL-TYROSINE...  | GO-0050731   | 8    | -0.468586 | -1.246005 | 0.197034  | 0.550952  | 1.000      |
| 579 GOBP-AMYLOID-PRECURSOR-PROTEIN-METABOLIC-PROCESS  | GO-0042982   | 5    | -0.569151 | -1.247118 | 0.212058  | 0.552460  | 1.000      |
| 580 GOBP-LEUKOCYTE-CELL-CELL-ADHESION                 | GO-0007159   | 6    | -0.534680 | -1.247267 | 0.198783  | 0.556044  | 1.000      |
| 581 GOBP-REGULATION-OF-ORGAN-GROWTH                   | GO-0046620   | 5    | -0.546573 | -1.248735 | 0.200820  | 0.557220  | 1.000      |
| 582 GOBP-POSITIVE-REGULATION-OF-SMOOTH-MUSCLE-CELL... | GO-0048661   | 5    | -0.550295 | -1.251361 | 0.220859  | 0.556179  | 1.000      |
| 583 GOBP-PEPTIDE-HORMONE-SECRETION                    | GO-0030072   | 7    | -0.475066 | -1.252879 | 0.212982  | 0.557599  | 1.000      |
| 584 GOBP-RESPONSE-TO-ENDOGENOUS-STIMULUS              | GO-0009719   | 34   | -0.321686 | -1.253451 | 0.167391  | 0.560453  | 1.000      |
| 585 GOBP-PERIPHERAL-NERVOUS-SYSTEM-DEVELOPMENT        | GO-0007422   | 9    | -0.453690 | -1.254995 | 0.209016  | 0.561007  | 1.000      |
| 586 GOBP-RESPONSE-TO-OXYGEN-CONTAINING-COMPOUND       | GO-1901700   | 39   | -0.314459 | -1.256246 | 0.169772  | 0.562651  | 1.000      |
| 587 GOBP-ENDOTHELIAL-CELL-PROLIFERATION               | GO-0001935   | 8    | -0.467869 | -1.256616 | 0.198381  | 0.566195  | 1.000      |
| 588 GOBP-ESTABLISHMENT-OF-PROTEIN-LOCALIZATION-TO...  | GO-0072594   | 6    | -0.522297 | -1.262512 | 0.193416  | 0.557938  | 1.000      |
| 589 GOBP-CELLULAR-RESPONSE-TO-EXTRACELLULAR-STIMULUS  | GO-0031668   | 8    | -0.473513 | -1.264480 | 0.179959  | 0.558265  | 1.000      |
| 590 GOBP-AMYLOID-PRECURSOR-PROTEIN-CATABOLIC-PROCESS  | GO-0042987   | 5    | -0.569151 | -1.266016 | 0.212724  | 0.559536  | 1.000      |
| 591 GOBP-POSITIVE-REGULATION-OF-CELLULAR-PROTEIN L... | GO-1903829   | 7    | -0.494507 | -1.271144 | 0.170732  | 0.553254  | 1.000      |
| 592 GOBP-ESTABLISHMENT-OF-PROTEIN-LOCALIZATION        | GO-0045184   | 18   | -0.372201 | -1.275383 | 0.168399  | 0.548454  | 1.000      |
| 593 GOBP-MITOTIC-CELL-CYCLE                           | GO-0002278   | 10   | -0.436571 | -1.275402 | 0.190476  | 0.552771  | 1.000      |
| 594 HALLMARK-HYPOXIA                                  | M5891        | 5    | -0.564267 | -1.277061 | 0.182203  | 0.553482  | 1.000      |
| 595 GOBP-POSITIVE-REGULATION-OF-INTRACELLULAR-SIGN... | GO-1902533   | 14   | -0.397074 | -1.279130 | 0.169197  | 0.553648  | 1.000      |
| 596 GOBP-NEGATIVE-REGULATION-OF-CELL-DEATH            | GO-0060548   | 22   | -0.361069 | -1.287355 | 0.183932  | 0.540643  | 1.000      |
| 597 HALLMARK-APOPTOSIS                                | M5902        | 6    | -0.544245 | -1.287596 | 0.198198  | 0.544585  | 1.000      |
| 598 GOBP-REGULATION-OF-NEUROGENESIS                   | GO-0050767   | 14   | -0.404806 | -1.294264 | 0.148559  | 0.535449  | 1.000      |
| 599 GOBP-INOSITOL-LIPID-MEDIATED-SIGNALING            | GO-0048017   | 8    | -0.495881 | -1.294940 | 0.168399  | 0.538567  | 1.000      |

Continuation of Table S12

| NAME                                                  | ID            | SIZE | ES        | NES       | NOM.p.val | FDR.q.val | FWER.p.val |
|-------------------------------------------------------|---------------|------|-----------|-----------|-----------|-----------|------------|
| 600 HALLMARK-UV-RESPONSE-UP                           | M5941         | 5    | -0.572518 | -1.295872 | 0.186441  | 0.541404  | 1.000      |
| 601 GOBP-MUSCLE-CELL-DEVELOPMENT                      | GO-0055001    | 5    | -0.575117 | -1.297733 | 0.179435  | 0.541769  | 1.000      |
| 602 GOBP-AMYLOID-BETA-METABOLIC-PROCESS               | GO-0050435    | 5    | -0.569151 | -1.300247 | 0.178357  | 0.540693  | 1.000      |
| 603 GOBP-VASCULATURE-DEVELOPMENT                      | GO-0001944    | 17   | -0.384114 | -1.302199 | 0.159915  | 0.541130  | 1.000      |
| 604 GOBP-REGIONALIZATION                              | GO-0003002    | 6    | -0.550943 | -1.302645 | 0.154506  | 0.544892  | 1.000      |
| 605 GOBP-POSITIVE-REGULATION-OF-DEVELOPMENTAL-PROCESS | GO-0051094    | 32   | -0.325929 | -1.312977 | 0.121277  | 0.528227  | 1.000      |
| 606 GOBP-NEGATIVE-REGULATION-OF-CELL-POPULATION-PR... | GO-0008285    | 9    | -0.480222 | -1.315295 | 0.146751  | 0.527680  | 1.000      |
| 607 REACTOME-PLATELET-ACTIVATION-SIGNALING-AND-AGG... | R-HSA-76002   | 7    | -0.519365 | -1.315499 | 0.134956  | 0.531967  | 1.000      |
| 608 GOBP-REGULATION-OF-HORMONE-SECRETION              | GO-0046883    | 8    | -0.495165 | -1.319630 | 0.154959  | 0.527597  | 1.000      |
| 609 GOBP-EPIDERMIS-DEVELOPMENT                        | GO-0008544    | 5    | -0.579498 | -1.320089 | 0.169422  | 0.531184  | 1.000      |
| 610 GOBP-NEGATIVE-REGULATION-OF-CELL-CYCLE            | GO-0045786    | 5    | -0.585152 | -1.324033 | 0.142276  | 0.527542  | 1.000      |
| 611 GOBP-PATTERN-SPECIFICATION-PROCESS                | GO-0007389    | 6    | -0.550943 | -1.329192 | 0.160083  | 0.521782  | 1.000      |
| 612 GOBP-REGULATION-OF-PEPTIDE-HORMONE-SECRETION      | GO-0090276    | 6    | -0.559672 | -1.330337 | 0.148374  | 0.524241  | 1.000      |
| 613 GOBP-CELLULAR-RESPONSE-TO-OXYGEN-CONTAINING.CO... | GO-1901701    | 29   | -0.349899 | -1.334255 | 0.114407  | 0.520829  | 1.000      |
| 614 GOBP-PEPTIDE-SECRETION                            | GO-0002790    | 9    | -0.475666 | -1.338868 | 0.131915  | 0.515499  | 1.000      |
| 615 GOBP-REGULATION-OF-PEPTIDYL-SERINE-PHOSPHORYLA... | GO-0033135    | 8    | -0.503369 | -1.339895 | 0.140725  | 0.518143  | 1.000      |
| 616 GOBP-REGULATION-OF-MUSCLE-ADAPTATION              | GO-0043502    | 5    | -0.591301 | -1.342875 | 0.150091  | 0.516677  | 1.000      |
| 617 REACTOME-BETA-CATENIN-INDEPENDENT-WNT-SIGNALING   | R-RNO-3858494 | 5    | -0.586736 | -1.345371 | 0.150826  | 0.516470  | 1.000      |
| 618 GOBP-CELL-ACTIVATION                              | GO-0001775    | 21   | -0.378232 | -1.345901 | 0.124197  | 0.520503  | 1.000      |
| 619 GOBP-POSITIVE-REGULATION-OF-PEPTIDYL-SERINE-PH... | GO-0033138    | 8    | -0.503369 | -1.348521 | 0.132383  | 0.520212  | 1.000      |
| 620 GOBP-REGULATION-OF-ORGANELLE-ORGANIZATION         | GO-0033043    | 14   | -0.425096 | -1.361664 | 0.124731  | 0.497228  | 1.000      |
| 621 GOBP-TAXIS                                        | GO-0042330    | 14   | -0.420183 | -1.363002 | 0.117391  | 0.499503  | 1.000      |
| 622 GOBP-REGULATION-OF-CELLULAR-COMPONENT-MOVEMENT    | GO-0051270    | 15   | -0.416302 | -1.364720 | 0.123318  | 0.500953  | 1.000      |
| 623 GOBP-REGULATION-OF-GTPASE-ACTIVITY                | GO-0043087    | 5    | -0.594421 | -1.367121 | 0.150101  | 0.501364  | 1.000      |
| 624 GOBP-MUSCLE-ADAPTATION                            | GO-0043500    | 5    | -0.591301 | -1.369894 | 0.131631  | 0.500891  | 1.000      |
| 625 GOBP-PRLMIRNA-TRANSCRIPTION-BY-RNA-POLYMERASE.II  | GO-0061614    | 7    | -0.540994 | -1.376152 | 0.128514  | 0.492995  | 1.000      |
| 626 GOBP-POSITIVE-REGULATION-OF-PRLMIRNA-TRANSCRI...  | GO-1902895    | 7    | -0.540994 | -1.377712 | 0.130081  | 0.495068  | 1.000      |
| 627 GOBP-MONONUCLEAR-CELL-DIFFERENTIATION             | GO-1903131    | 7    | -0.531582 | -1.377879 | 0.121399  | 0.499973  | 1.000      |
| 628 GOBP-REGULATION-OF-MAP-KINASE-ACTIVITY            | GO-0043405    | 9    | -0.490243 | -1.378515 | 0.129103  | 0.503858  | 1.000      |
| 629 GOBP-POSITIVE-REGULATION-OF-NEURON-DEATH          | GO-1901216    | 5    | -0.610837 | -1.383073 | 0.107071  | 0.500295  | 1.000      |
| 630 GOBP-TEMPERATURE-HOMEOSTASIS                      | GO-0001659    | 5    | -0.610729 | -1.387734 | 0.144269  | 0.496130  | 1.000      |
| 631 GOBP-POSITIVE-REGULATION-OF-LEUKOCYTE-CELL-CEL... | GO-1903039    | 5    | -0.625227 | -1.389115 | 0.119748  | 0.498816  | 1.000      |
| 632 GOBP-ACTIN-FILAMENT-BASED-PROCESS                 | GO-0030029    | 7    | -0.547046 | -1.390985 | 0.120582  | 0.500557  | 1.000      |
| 633 GOBP-OSTEOBLAST-DIFFERENTIATION                   | GO-0001649    | 5    | -0.602279 | -1.396642 | 0.128205  | 0.494447  | 1.000      |
| 634 GOBP-POSITIVE-REGULATION-OF-GLIOGENESIS           | GO-0014015    | 5    | -0.615425 | -1.397355 | 0.117886  | 0.498841  | 1.000      |
| 635 GOBP-RESPONSE-TO-WOUNDING                         | GO-0009611    | 15   | -0.431944 | -1.398397 | 0.108051  | 0.502279  | 1.000      |
| 636 GOBP-REGULATION-OF-RESPONSE-TO-EXTERNAL-STIMULUS  | GO-0032101    | 15   | -0.425832 | -1.399342 | 0.076923  | 0.505897  | 1.000      |
| 637 GOBP-REGULATION-OF-GLIOGENESIS                    | GO-0014013    | 5    | -0.615425 | -1.399512 | 0.124473  | 0.511528  | 1.000      |
| 638 GOBP-NEURON-DEATH                                 | GO-0070997    | 18   | -0.414330 | -1.403058 | 0.094595  | 0.509347  | 1.000      |
| 639 GOBP-POSITIVE-REGULATION-OF-CELL-CELL-ADHESION    | GO-0022409    | 5    | -0.625227 | -1.421438 | 0.117886  | 0.475040  | 1.000      |
| 640 GOBP-REGULATION-OF-CELLULAR-COMPONENT-BIOGENESIS  | GO-0044087    | 10   | -0.501060 | -1.430004 | 0.069721  | 0.443309  | 1.000      |
| 641 GOBP-POSITIVE-REGULATION-OF-CELLULAR-COMPONENT... | GO-0051130    | 24   | -0.386394 | -1.439997 | 0.088421  | 0.447206  | 1.000      |
| 642 REACTOME-CELL-CYCLE                               | R-RNO-1640170 | 6    | -0.589117 | -1.440993 | 0.110647  | 0.451208  | 1.000      |

Continuation of Table S12

| NAME | ID                                                | SIZE | ES        | NES       | NOM.p.val | FDR.q.val | FWER.p.val |
|------|---------------------------------------------------|------|-----------|-----------|-----------|-----------|------------|
| 643  | GOBP-POSITIVE-REGULATION_OF_PHOSPHATIDYLINOSIT... | 5    | -0.640037 | -1.441014 | 0.113636  | 0.457072  | 1.000      |
| 644  | GOBP-NUCLEAR-TRANSPORT                            | 5    | -0.648141 | -1.444187 | 0.106996  | 0.456106  | 1.000      |
| 645  | REACTOME-INTERLEUKIN_4-AND-INTERLEUKIN_13-SIGN... | 8    | -0.542144 | -1.450218 | 0.096579  | 0.449526  | 1.000      |
| 646  | GOBP-NEGATIVE-REGULATION_OF_RESPONSE_TO_EXTERN... | 5    | -0.649576 | -1.450960 | 0.104895  | 0.453997  | 1.000      |
| 647  | GOBP-RESPONSE-TO-GROWTH-FACTOR                    | 18   | -0.439938 | -1.473195 | 0.074786  | 0.413154  | 1.000      |
| 648  | GOBP-PHOSPHATIDYLINOSITOL_3_KINASE-SIGNALING      | 7    | -0.591342 | -1.474078 | 0.082803  | 0.417188  | 1.000      |
| 649  | GOBP-NEURON-APOPTOTIC-PROCESS                     | 12   | -0.478088 | -1.474587 | 0.086242  | 0.422006  | 1.000      |
| 650  | GOBP-REGULATION_OF_MAPK-CASCADE                   | 13   | -0.478367 | -1.476210 | 0.057377  | 0.424326  | 1.000      |
| 651  | GOBP-NEGATIVE-REGULATION_OF_LOCOMOTION            | 5    | -0.674416 | -1.490691 | 0.086316  | 0.400576  | 1.000      |
| 652  | GOBP-EPITHELIAL-CELL-PROLIFERATION                | 12   | -0.482710 | -1.492066 | 0.072435  | 0.403646  | 1.000      |
| 653  | GOBP-T-CELL-ACTIVATION                            | 8    | -0.569826 | -1.501333 | 0.081933  | 0.391856  | 1.000      |
| 654  | GOBP-LOCOMOTION                                   | 31   | -0.378983 | -1.510029 | 0.046256  | 0.379981  | 1.000      |
| 655  | GOBP-PEPTIDYL-AMINO-ACID-MODIFICATION             | 22   | -0.418669 | -1.510622 | 0.036017  | 0.384932  | 1.000      |
| 656  | GOBP-POSITIVE-REGULATION_OF_CELL-DIFFERENTIATION  | 27   | -0.397351 | -1.514642 | 0.043912  | 0.382852  | 1.000      |
| 657  | GOBP-POSITIVE-REGULATION_OF_ESTABLISHMENT_OF_P... | 5    | -0.677115 | -1.518990 | 0.072495  | 0.380272  | 1.000      |
| 658  | GOBP-MUSCLE-SYSTEM-PROCESS                        | 8    | -0.584220 | -1.519516 | 0.047826  | 0.385371  | 1.000      |
| 659  | GOBP-REGULATION_OF_MUSCLE-SYSTEM-PROCESS          | 8    | -0.584220 | -1.52674  | 0.045652  | 0.385200  | 1.000      |
| 660  | GOBP-MYOTUBE-DIFFERENTIATION                      | 5    | -0.683719 | -1.529059 | 0.060345  | 0.379134  | 1.000      |
| 661  | GOBP-CIRCULATORY-SYSTEM-DEVELOPMENT               | 21   | -0.425040 | -1.531168 | 0.052747  | 0.381561  | 1.000      |
| 662  | GOBP-MUSCLE-STRUCTURE-DEVELOPMENT                 | 16   | -0.469936 | -1.536619 | 0.040632  | 0.377089  | 1.000      |
| 663  | GOBP-ANIMAL-ORGAN-MORPHOGENESIS                   | 12   | -0.503698 | -1.539273 | 0.044625  | 0.378050  | 1.000      |
| 664  | GOBP-REGULATION_OF_CELL-DEVELOPMENT               | 15   | -0.472826 | -1.544749 | 0.037657  | 0.373583  | 1.000      |
| 665  | GOBP-SMOOTH-MUSCLE-CELL-PROLIFERATION             | 6    | -0.659402 | -1.565843 | 0.055066  | 0.337845  | 1.000      |
| 666  | GOBP-REGULATION_OF_CELL-ADHESION                  | 13   | -0.506298 | -1.573046 | 0.038055  | 0.329712  | 1.000      |
| 667  | GOBP-LYMPHOCYTE-ACTIVATION                        | 9    | -0.565885 | -1.589436 | 0.054167  | 0.306512  | 1.000      |
| 668  | GOBP-PEPTIDYL-SERINE-MODIFICATION                 | 12   | -0.515823 | -1.596325 | 0.037895  | 0.299959  | 1.000      |
| 669  | GOBP-ACTIVATION_OF_MAPK-ACTIVITY                  | 6    | -0.677561 | -1.609641 | 0.024145  | 0.281506  | 1.000      |
| 670  | GOBP-POSITIVE-REGULATION_OF_MAP_KINASE-ACTIVITY   | 6    | -0.677561 | -1.610984 | 0.032990  | 0.284697  | 1.000      |
| 671  | GOBP-MYELOID-CELL-DIFFERENTIATION                 | 13   | -0.511716 | -1.618745 | 0.030501  | 0.277068  | 1.000      |
| 672  | GOBP-WOUND-HEALING                                | 13   | -0.523043 | -1.619145 | 0.036559  | 0.282313  | 1.000      |
| 673  | GOBP-REGULATION_OF_PHOSPHATIDYLINOSITOL_3_KINA... | 6    | -0.668211 | -1.620133 | 0.029528  | 0.286553  | 1.000      |
| 674  | GOBP-POSITIVE-REGULATION_OF_CELLULAR-COMPONENT... | 9    | -0.581902 | -1.621444 | 0.047131  | 0.290513  | 1.000      |
| 675  | GOBP-NEGATIVE-REGULATION_OF_MULTICELLULAR_ORGA... | 15   | -0.498699 | -1.625225 | 0.030905  | 0.289950  | 1.000      |
| 676  | GOBP-REGULATION_OF_PEPTIDE-SECRETION              | 7    | -0.631246 | -1.635431 | 0.033058  | 0.277872  | 1.000      |
| 677  | REACTOME-SIGNALING-BY-RECEPTOR-TYROSINE-KINASES   | 26   | -0.437481 | -1.644474 | 0.027197  | 0.267731  | 1.000      |
| 678  | GOBP-CELL-MIGRATION                               | 22   | -0.458771 | -1.651563 | 0.013158  | 0.262281  | 1.000      |
| 679  | GOBP-REGULATION_OF_MULTICELLULAR-ORGANISMAL.DE... | 31   | -0.423982 | -1.652043 | 0.010917  | 0.268200  | 1.000      |
| 680  | GOBP-REGULATION_OF_OSTEOCLAST-DIFFERENTIATION     | 5    | -0.722892 | -1.652381 | 0.032922  | 0.274207  | 1.000      |
| 681  | GOBP-REGULATION_OF_CELL-ACTIVATION                | 8    | -0.619836 | -1.658298 | 0.041580  | 0.270636  | 1.000      |
| 682  | GOBP-MYELOID-LEUKOCYTE-DIFFERENTIATION            | 11   | -0.509032 | -1.674263 | 0.024283  | 0.250379  | 1.000      |
| 683  | GOBP-NEGATIVE-REGULATION_OF_NERVOUS-SYSTEM.DEV... | 5    | -0.758339 | -1.680847 | 0.015054  | 0.231535  | 0.999      |
| 684  | GOBP-POSITIVE-REGULATION_OF_MYELOID-LEUKOCYTE...  | 6    | -0.720262 | -1.691009 | 0.025478  | 0.236108  | 0.999      |
| 685  | GOBP-MUSCLE-ORGAN-DEVELOPMENT                     | 9    | -0.618178 | -1.697899 | 0.041580  | 0.231359  | 0.999      |

Continuation of Table S12

| NAME | ID                                                | SIZE | ES        | NES       | NOM.p.val | FDR.q.val | FWER.p.val |
|------|---------------------------------------------------|------|-----------|-----------|-----------|-----------|------------|
| 686  | GOBP-REGULATION-OF-PEPTIDE-TRANSPORT              | 10   | -0.595757 | -1.717912 | 0.020450  | 0.205472  | 0.997      |
| 687  | GOBP-REGULATION-OF-VASCULAR-ASSOCIATED-SMOOTH...  | 5    | -0.763553 | -1.724440 | 0.012793  | 0.201777  | 0.996      |
| 688  | GOBP-MUSCLE-CELL-PROLIFERATION                    | 8    | -0.648073 | -1.731200 | 0.016563  | 0.198255  | 0.994      |
| 689  | GOBP-POSITIVE-REGULATION-OF-MULTICELLULAR-ORGA... | 32   | -0.443673 | -1.737259 | 0.008197  | 0.196567  | 0.994      |
| 690  | GOBP-POSITIVE-REGULATION-OF-MAPK-CASCADE          | 9    | -0.632339 | -1.748022 | 0.015217  | 0.188448  | 0.991      |
| 691  | GOBP-REGULATION-OF-CELL-ADHESION                  | 9    | -0.642770 | -1.755669 | 0.019190  | 0.184707  | 0.990      |
| 692  | GOBP-REGULATION-OF-CELL-DIFFERENTIATION           | 36   | -0.431519 | -1.766512 | 0.008715  | 0.177398  | 0.985      |
| 693  | GOBP-POSITIVE-REGULATION-OF-ORGANELLE-ORGANIZA... | 10   | -0.619184 | -1.778978 | 0.014644  | 0.167682  | 0.978      |
| 694  | HALLMARK-TNFA-SIGNALING-VIA-NFKB                  | 14   | -0.562234 | -1.783902 | 0.010142  | 0.167690  | 0.975      |
| 695  | GOBP-OSTEOCLAST-DIFFERENTIATION                   | 6    | -0.731707 | -1.787862 | 0.017893  | 0.168708  | 0.970      |
| 696  | GOBP-OSSIFICATION                                 | 9    | -0.637738 | -1.790477 | 0.010142  | 0.172434  | 0.969      |
| 697  | GOBP-ERK1-AND-ERK2-CASCADE                        | 5    | -0.793286 | -1.797290 | 0.008299  | 0.171282  | 0.958      |
| 698  | GOBP-POSITIVE-REGULATION-OF-MYELOID-CELL-DIFFE... | 7    | -0.717991 | -1.799217 | 0.006237  | 0.176799  | 0.957      |
| 699  | GOBP-LEUKOCYTE-DIFFERENTIATION                    | 15   | -0.562342 | -1.802932 | 0.013100  | 0.180780  | 0.955      |
| 700  | GOBP-SKELETAL-MUSCLE-ORGAN-DEVELOPMENT            | 5    | -0.793857 | -1.827798 | 0.012685  | 0.156117  | 0.929      |
| 701  | GOBP-REGULATION-OF-MYELOID-CELL-DIFFERENTIATION   | 9    | -0.667040 | -1.841018 | 0.004132  | 0.147869  | 0.905      |
| 702  | GOBP-REGULATION-OF-MYELOID-LEUKOCYTE-DIFFERENT... | 8    | -0.686563 | -1.842793 | 0.010460  | 0.154857  | 0.903      |
| 703  | GOBP-POSITIVE-REGULATION-OF-CELL-ADHESION         | 7    | -0.727441 | -1.876811 | 0.008032  | 0.122151  | 0.825      |
| 704  | GOBP-REGULATION-OF-LEUKOCYTE-DIFFERENTIATION      | 9    | -0.695397 | -1.895522 | 0.012712  | 0.109228  | 0.765      |
| 705  | GOBP-POSITIVE-REGULATION-OF-TRANSCRIPTION-BY-R... | 24   | -0.518103 | -1.897927 | 0.002105  | 0.114690  | 0.757      |
| 706  | GOBP-ANATOMICAL-STRUCTURE-FORMATION-INVOLVED-I... | 20   | -0.534976 | -1.904357 | 0.002070  | 0.116432  | 0.729      |
| 707  | GOBP-POSITIVE-REGULATION-OF-HEMOPOIESIS           | 7    | -0.745360 | -1.909096 | 0.003953  | 0.120339  | 0.717      |
| 708  | REACTOME-SIGNALING-BY-NTRKS                       | 18   | -0.562111 | -1.922023 | 0.004283  | 0.115332  | 0.658      |
| 709  | GOBP-NEGATIVE-REGULATION-OF-CELL-DEVELOPMENT      | 10   | -0.678086 | -1.926710 | 0.004090  | 0.121362  | 0.643      |
| 710  | REACTOME-NGF-STIMULATED-TRANSCRIPTION             | 6    | -0.815338 | -1.940928 | 0.002096  | 0.117181  | 0.591      |
| 711  | GOBP-CELL-POPULATION-PROLIFERATION                | 31   | -0.496633 | -1.970494 | 0.000000  | 0.108387  | 0.476      |
| 712  | REACTOME-NUCLEAR-EVENTS-KINASE-AND-TRANSCRIPTI... | 11   | -0.679255 | -1.990635 | 0.002179  | 0.103686  | 0.427      |
| 713  | GOBP-MUSCLE-TISSUE-DEVELOPMENT                    | 11   | -0.674644 | -2.018202 | 0.002304  | 0.091098  | 0.334      |
| 714  | GOBP-POSITIVE-REGULATION-OF-CELL-POPULATION-PR... | 21   | -0.571767 | -2.033686 | 0.000000  | 0.096320  | 0.289      |
| 715  | GOBP-POSITIVE-REGULATION-OF-BIOSYNTHETIC-PROCESS  | 27   | -0.535520 | -2.059733 | 0.002088  | 0.099952  | 0.235      |
| 716  | GOBP-POSITIVE-REGULATION-OF-NUCLEOBASE-CONTAIN... | 28   | -0.545353 | -2.087747 | 0.000000  | 0.116790  | 0.185      |
| 717  | GOBP-IMMUNE-SYSTEM-DEVELOPMENT                    | 17   | -0.608753 | -2.088167 | 0.002212  | 0.233580  | 0.185      |

End of Table

Supplementary Table S13: CTX-M late profile (45 DPL peak) GSEA results.

| Begin of Table S13 |                                                   |             |      |          |          |           |           |            |       |
|--------------------|---------------------------------------------------|-------------|------|----------|----------|-----------|-----------|------------|-------|
|                    | NAME                                              | ID          | SIZE | ES       | NES      | NOM.p.val | FDR.q.val | FWER.p.val |       |
| 0                  | GOBP-TEMPERATURE.HOMEOSTASIS                      | GO-0001659  | 5    | 0.814246 | 1.904456 | 0.003205  | 1.000000  |            | 0.724 |
| 1                  | GOBP-LONG-TERM.MEMORY                             | GO-0007616  | 6    | 0.692177 | 1.737028 | 0.034843  | 1.000000  |            | 0.976 |
| 2                  | GOBP-NEGATIVE-REGULATION-OF-LIPID-METABOLIC.PR... | GO-00045833 | 5    | 0.724414 | 1.727147 | 0.046053  | 1.000000  |            | 0.978 |
| 3                  | GOBP-REGULATION-OF-LIPID-METABOLIC.PROCESS        | GO-0019216  | 7    | 0.624385 | 1.719359 | 0.010753  | 1.000000  |            | 0.979 |
| 4                  | GOBP-CELLULAR-RESPONSE-TO-ORGANIC_CYCLIC-COMPOUND | GO-0071407  | 13   | 0.480000 | 1.695269 | 0.021552  | 1.000000  |            | 0.987 |
| 5                  | GOBP-CARBOHYDRATE.HOMEOSTASIS                     | GO-0003500  | 7    | 0.608837 | 1.655799 | 0.025735  | 1.000000  |            | 0.994 |
| 6                  | GOBP-REGULATION-OF_SMALL-MOLECULE.METABOLIC.PR... | GO-0006212  | 9    | 0.528680 | 1.650303 | 0.029167  | 1.000000  |            | 0.995 |
| 7                  | GOBP-MULTICELLULAR-ORGANISMAL.HOMEOSTASIS         | GO-00048871 | 12   | 0.471564 | 1.632236 | 0.043269  | 1.000000  |            | 0.997 |
| 8                  | GOBP-MORPHOGENESIS-OF-AN-EPITHELIUM               | GO-0002009  | 6    | 0.621951 | 1.594586 | 0.050955  | 1.000000  |            | 0.999 |
| 9                  | GOBP-CELLULAR-RESPONSE-TO-KETONE                  | GO-1901655  | 5    | 0.612336 | 1.432981 | 0.078261  | 1.000000  |            | 1.000 |
| 10                 | GOBP-ENDOTHELIAL-CELL-PROLIFERATION               | GO-0001935  | 8    | 0.492299 | 1.411948 | 0.098540  | 1.000000  |            | 1.000 |
| 11                 | GOBP-NEGATIVE-REGULATION-OF-CATALYTIC-ACTIVITY    | GO-00043086 | 17   | 0.363209 | 1.404382 | 0.091398  | 1.000000  |            | 1.000 |
| 12                 | GOBP-POSITIVE-REGULATION-OF-APOPTOTIC-SIGNALIN... | GO-2001235  | 5    | 0.579000 | 1.402481 | 0.108280  | 1.000000  |            | 1.000 |
| 13                 | GOBP-REGULATION-OF-VASCULATURE.DEVELOPMENT        | GO-1901342  | 5    | 0.571971 | 1.393704 | 0.116208  | 1.000000  |            | 1.000 |
| 14                 | GOBP-SMALL-MOLECULE.METABOLIC.PROCESS             | GO-00044281 | 15   | 0.391764 | 1.390275 | 0.055814  | 1.000000  |            | 1.000 |
| 15                 | GOBP-MALE.GAMETE-GENERATION                       | GO-00048232 | 5    | 0.577344 | 1.387334 | 0.110063  | 1.000000  |            | 1.000 |
| 16                 | GOBP-RESPONSE-TO-CARBOHYDRATE                     | GO-00009743 | 5    | 0.580980 | 1.380092 | 0.130000  | 1.000000  |            | 1.000 |
| 17                 | GOBP-MYELOID-LEUKOCYTE-ACTIVATION                 | GO-0002274  | 8    | 0.475974 | 1.375632 | 0.108949  | 1.000000  |            | 1.000 |
| 18                 | GOBP-NEGATIVE-REGULATION-OF-IMMUNE-SYSTEM.PROCESS | GO-00002683 | 5    | 0.568080 | 1.368483 | 0.109756  | 1.000000  |            | 1.000 |
| 19                 | GOBP-LIPID-METABOLIC.PROCESS                      | GO-0006629  | 10   | 0.438158 | 1.357959 | 0.120370  | 1.000000  |            | 1.000 |
| 20                 | GOBP-ESTABLISHMENT-OF-PROTEIN-LOCALIZATION-TO-... | GO-00072594 | 6    | 0.524390 | 1.340301 | 0.115152  | 1.000000  |            | 1.000 |
| 21                 | GOBP-CELLULAR-RESPONSE-TO-DNA-DAMAGE-STIMULUS     | GO-0006974  | 5    | 0.568726 | 1.338634 | 0.138554  | 1.000000  |            | 1.000 |
| 22                 | GOBP-LEUKOCYTE-MIGRATION                          | GO-00050900 | 6    | 0.524390 | 1.335666 | 0.119205  | 1.000000  |            | 1.000 |
| 23                 | GOBP-POSITIVE-REGULATION-OF-LOCOMOTION            | GO-0004017  | 11   | 0.428572 | 1.334863 | 0.130952  | 1.000000  |            | 1.000 |
| 24                 | GOBP-EPITHELIAL-CELL-PROLIFERATION                | GO-00050673 | 12   | 0.381579 | 1.322804 | 0.103960  | 1.000000  |            | 1.000 |
| 25                 | GOBP-RESPONSE-TO-MONOSACCHARIDE                   | GO-00034284 | 5    | 0.580980 | 1.321477 | 0.128125  | 1.000000  |            | 1.000 |
| 26                 | GOBP-BLOOD_VESSEL-ENDOTHELIAL-CELL-MIGRATION      | GO-00043534 | 8    | 0.444610 | 1.317215 | 0.142857  | 1.000000  |            | 1.000 |
| 27                 | GOBP-REGULATION-OF-ENDOTHELIAL-CELL-MIGRATION     | GO-00010594 | 5    | 0.565265 | 1.314722 | 0.166667  | 1.000000  |            | 1.000 |
| 28                 | GOBP-REGULATION-OF-EPITHELIAL-CELL-MIGRATION      | GO-00010632 | 6    | 0.507243 | 1.312504 | 0.151515  | 1.000000  |            | 1.000 |
| 29                 | GOBP-REGULATION-OF-LIPID-BIOSYNTHETIC.PROCESS     | GO-00046890 | 6    | 0.515207 | 1.297160 | 0.153846  | 1.000000  |            | 1.000 |
| 30                 | GOBP-ENDOTHELIAL-CELL-MIGRATION                   | GO-00043542 | 8    | 0.444610 | 1.292866 | 0.153846  | 1.000000  |            | 1.000 |
| 31                 | GOBP-POSITIVE-REGULATION-OF-IMMUNE-RESPONSE       | GO-00050778 | 9    | 0.421582 | 1.278661 | 0.181818  | 1.000000  |            | 1.000 |
| 32                 | GOBP-LIPID-BIOSYNTHETIC.PROCESS                   | GO-0008610  | 6    | 0.515207 | 1.277405 | 0.155709  | 1.000000  |            | 1.000 |
| 33                 | GOBP-CELLULAR-GLUCOSE-HOMEOSTASIS                 | GO-00016678 | 5    | 0.554217 | 1.270988 | 0.166163  | 1.000000  |            | 1.000 |
| 34                 | GOBP-RESPONSE-TO-ORGANIC_CYCLIC-COMPOUND          | GO-0014070  | 20   | 0.314057 | 1.260219 | 0.128655  | 1.000000  |            | 1.000 |
| 35                 | GOBP-CELL-ACTIVATION                              | GO-0001775  | 21   | 0.298530 | 1.251973 | 0.154696  | 1.000000  |            | 1.000 |
| 36                 | GOBP-PHAGOCYTOSIS                                 | GO-0006909  | 5    | 0.518072 | 1.250350 | 0.170732  | 1.000000  |            | 1.000 |
| 37                 | GOBP-CELLULAR-LIPID-METABOLIC.PROCESS             | GO-00044255 | 7    | 0.471653 | 1.248008 | 0.194946  | 1.000000  |            | 1.000 |
| 38                 | GOBP-PATTERN-SPECIFICATION.PROCESS                | GO-0007389  | 6    | 0.476510 | 1.246578 | 0.170492  | 1.000000  |            | 1.000 |
| 39                 | GOBP-NEGATIVE-REGULATION-OF-GENE-EXPRESSION       | GO-00010629 | 12   | 0.368421 | 1.240564 | 0.188285  | 1.000000  |            | 1.000 |
| 40                 | GOBP-RESPONSE-TO-NITROGEN-COMPOUND                | GO-1901698  | 34   | 0.264033 | 1.238171 | 0.116279  | 1.000000  |            | 1.000 |

Continuation of Table S13

| NAME | ID                                                    | SIZE | ES       | NES      | NOM.p.val | FDR.q.val | FWER.p.val |
|------|-------------------------------------------------------|------|----------|----------|-----------|-----------|------------|
| 41   | GOBP-PEPTIDE-BIOSYNTHETIC-PROCESS                     | 7    | 0.444321 | 1.238102 | 0.184906  | 1.000000  | 1.000      |
| 42   | GOBP-POSITIVE-REGULATION-OF-ANION-TRANSPORT           | 9    | 0.417721 | 1.232201 | 0.199134  | 1.000000  | 1.000      |
| 43   | GOBP-INTRINSIC-APOPTOTIC-SIGNALING-PATHWAY            | 5    | 0.503992 | 1.223392 | 0.199357  | 1.000000  | 1.000      |
| 44   | GOBP-CELLULAR-RESPONSE-TO-NITROGEN-COMPOUND           | 20   | 0.302673 | 1.223322 | 0.193939  | 1.000000  | 1.000      |
| 45   | GOBP-TISSUE-MORPHOGENESIS                             | 7    | 0.444444 | 1.211666 | 0.189189  | 1.000000  | 1.000      |
| 46   | GOBP-MEMORY                                           | 13   | 0.348991 | 1.210904 | 0.181395  | 1.000000  | 1.000      |
| 47   | GOBP-REGULATION-OF-CELLULAR-CATABOLIC-PROCESS         | 10   | 0.375560 | 1.207050 | 0.195833  | 1.000000  | 1.000      |
| 48   | GOBP-CELL-CYCLE-PROCESS                               | 11   | 0.363636 | 1.200359 | 0.194805  | 1.000000  | 1.000      |
| 49   | GOBP-REGIONALIZATION                                  | 6    | 0.475610 | 1.196240 | 0.231317  | 1.000000  | 1.000      |
| 50   | GOBP-AMIDE-BIOSYNTHETIC-PROCESS                       | 7    | 0.444321 | 1.188910 | 0.246269  | 1.000000  | 1.000      |
| 51   | GOBP-REGULATION-OF-PEPTIDE-HORMONE-SECRETION          | 6    | 0.457240 | 1.187195 | 0.228374  | 1.000000  | 1.000      |
| 52   | GOBP-PLATELET-ACTIVATION                              | 6    | 0.451219 | 1.179721 | 0.228669  | 1.000000  | 1.000      |
| 53   | GOBP-TISSUE-MIGRATION                                 | 9    | 0.408387 | 1.178161 | 0.240506  | 1.000000  | 1.000      |
| 54   | GOBP-NEGATIVE-REGULATION-OF-CELL-CYCLE                | 5    | 0.492080 | 1.160302 | 0.259016  | 1.000000  | 1.000      |
| 55   | GOBP-POSITIVE-REGULATION-OF-DEFENSE-RESPONSE          | 5    | 0.474561 | 1.148284 | 0.249147  | 1.000000  | 1.000      |
| 56   | GOBP-FAT-CELL-DIFFERENTIATION                         | 9    | 0.367277 | 1.133323 | 0.248062  | 1.000000  | 1.000      |
| 57   | GOBP-NEGATIVE-REGULATION-OF-MOLECULAR-FUNCTION        | 24   | 0.263408 | 1.127556 | 0.262069  | 1.000000  | 1.000      |
| 58   | GOBP-DEVELOPMENTAL-PROCESS-INVOLVED-IN-REPRODUCTION   | 11   | 0.337662 | 1.122976 | 0.244898  | 1.000000  | 1.000      |
| 59   | GOBP-CARBOHYDRATE-DERIVATIVE-METABOLIC-PROCESS        | 7    | 0.407407 | 1.117982 | 0.285714  | 1.000000  | 1.000      |
| 60   | GOBP-MITOTIC-CELL-CYCLE                               | 10   | 0.358974 | 1.117073 | 0.296943  | 1.000000  | 1.000      |
| 61   | GOBP-PHOSPHATIDYLINOSITOL-3-KINASE-SIGNALING          | 7    | 0.407407 | 1.114405 | 0.283088  | 1.000000  | 1.000      |
| 62   | GOBP-NEGATIVE-REGULATION-OF-HYDROLASE-ACTIVITY        | 11   | 0.341251 | 1.104337 | 0.287500  | 1.000000  | 1.000      |
| 63   | GOBP-ANATOMICAL-STRUCTURE-HOMEOSTASIS                 | 7    | 0.395092 | 1.091505 | 0.309859  | 1.000000  | 1.000      |
| 64   | GOBP-LYMPHOCYTE-ACTIVATION                            | 9    | 0.367089 | 1.089079 | 0.324786  | 1.000000  | 1.000      |
| 65   | REACTOME-MEMBRANE-TRAFFICKING                         | 5    | 0.454434 | 1.084972 | 0.299094  | 1.000000  | 1.000      |
| 66   | REACTOME-G-ALPHA-Z-SIGNALING-EVENTS                   | 5    | 0.445783 | 1.073439 | 0.346479  | 1.000000  | 1.000      |
| 67   | REACTOME-VESICLE-MEDIATED-TRANSPORT                   | 5    | 0.454434 | 1.066071 | 0.345794  | 1.000000  | 1.000      |
| 68   | GOBP-RESPONSE-TO-NUTRIENT                             | 5    | 0.453874 | 1.064207 | 0.361635  | 1.000000  | 1.000      |
| 69   | GOBP-REGULATION-OF-IMMUNE-RESPONSE                    | 12   | 0.305695 | 1.060285 | 0.355769  | 1.000000  | 1.000      |
| 70   | GOBP-NEGATIVE-REGULATION-OF-PHOSPHORUS-METABOLISM     | 9    | 0.348214 | 1.058991 | 0.371429  | 1.000000  | 1.000      |
| 71   | GOBP-REGULATION-OF-INFLAMMATORY-RESPONSE              | 7    | 0.384692 | 1.057949 | 0.328720  | 1.000000  | 1.000      |
| 72   | GOBP-REGULATION-OF-DEFENSE-RESPONSE                   | 7    | 0.384692 | 1.056955 | 0.340000  | 1.000000  | 1.000      |
| 73   | GOBP-REGULATION-OF-CELL-ACTIVATION                    | 8    | 0.362500 | 1.055096 | 0.368231  | 1.000000  | 1.000      |
| 74   | GOBP-MONOCARBOXYLIC-ACID-METABOLIC-PROCESS            | 6    | 0.408672 | 1.054570 | 0.378571  | 1.000000  | 1.000      |
| 75   | GOBP-POSITIVE-REGULATION-OF-EPITHELIAL-CELL-MIGRATION | 5    | 0.445783 | 1.054308 | 0.369637  | 1.000000  | 1.000      |
| 76   | GOBP-REGULATION-OF-HORMONE-LEVELS                     | 12   | 0.304942 | 1.054018 | 0.393443  | 1.000000  | 1.000      |
| 77   | GOBP-EPIDERMIS-DEVELOPMENT                            | 5    | 0.431328 | 1.044782 | 0.403614  | 1.000000  | 1.000      |
| 78   | GOBP-LEUKOCYTE-MEDIATED-IMMUNITY                      | 7    | 0.382716 | 1.042437 | 0.349265  | 1.000000  | 1.000      |
| 79   | GOBP-T-CELL-ACTIVATION                                | 8    | 0.362500 | 1.041906 | 0.378788  | 1.000000  | 1.000      |
| 80   | GOBP-OSSIFICATION                                     | 9    | 0.341772 | 1.041450 | 0.389830  | 1.000000  | 1.000      |
| 81   | GOBP-ERBB-SIGNALING-PATHWAY                           | 5    | 0.445783 | 1.039690 | 0.374150  | 1.000000  | 1.000      |
| 82   | REACTOME-BETA-CATENIN-INDEPENDENT-WNT-SIGNALING       | 5    | 0.445783 | 1.037556 | 0.372014  | 1.000000  | 1.000      |
| 83   | GOBP-REGULATION-OF-PEPTIDE-SECRETION                  | 7    | 0.390455 | 1.035456 | 0.394366  | 1.000000  | 1.000      |



Continuation of Table S13

| NAME | ID                                                | SIZE          | ES       | NES      | NOM.p.val | FDR.q.val | FWER.p.val |       |
|------|---------------------------------------------------|---------------|----------|----------|-----------|-----------|------------|-------|
| 84   | GOBP-PROTEIN_KINASE_B-SIGNALING                   | 6             | 0.406964 | 1.032593 | 0.381119  | 1.000000  | 1.000      |       |
| 85   | GOBP-REGULATION_OF_PHOSPHATIDYLINOSITOL-3.KINA... | 6             | 0.402439 | 1.030972 | 0.391304  | 1.000000  | 1.000      |       |
| 86   | GOBP-CYTOSKELETON_ORGANIZATION                    | 11            | 0.308775 | 1.021986 | 0.383966  | 1.000000  | 1.000      |       |
| 87   | GOBP-EMBRYO-DEVELOPMENT_ENDING_IN_BIRTH_OR_EGG... | 9             | 0.341772 | 1.020099 | 0.403101  | 1.000000  | 1.000      |       |
| 88   | GOBP-CIRCADIAN_REGULATION_OF_GENE_EXPRESSION      | 5             | 0.420377 | 1.019278 | 0.396875  | 1.000000  | 1.000      |       |
| 89   | GOBP-CELLULAR_RESPONSE_TO_ALCOHOL                 | 5             | 0.433735 | 1.016363 | 0.372483  | 1.000000  | 1.000      |       |
| 90   | GOBP-NEGATIVE_REGULATION_OF_BIOSYNTHETIC_PROCESS  | 13            | 0.279729 | 1.011303 | 0.403361  | 1.000000  | 1.000      |       |
| 91   | GOBP-NEGATIVE_REGULATION_OF_SYNAPTIC_TRANSMISSION | 6             | 0.398952 | 1.009713 | 0.438538  | 1.000000  | 1.000      |       |
| 92   | GOBP-NEGATIVE_REGULATION_OF_ANION_TRANSPORT       | 8             | 0.348817 | 1.007726 | 0.453061  | 1.000000  | 1.000      |       |
| 93   | GOBP-ORGANIC_HYDROXY_COMPOUND_TRANSPORT           | 6             | 0.378203 | 1.000933 | 0.425087  | 1.000000  | 1.000      |       |
| 94   | GOBP-REGULATION_OF_PEPTIDE_TRANSPORT              | 10            | 0.313833 | 0.999715 | 0.457831  | 1.000000  | 1.000      |       |
| 95   | GOBP-NEGATIVE_REGULATION_OF_RESPONSE_TO_EXTERN... | 5             | 0.418326 | 0.999598 | 0.421569  | 1.000000  | 1.000      |       |
| 96   | GOBP-REGULATION_OF_PHOSPHORUS_METABOLIC_PROCESS   | 27            | 0.228089 | 0.994008 | 0.475862  | 1.000000  | 1.000      |       |
| 97   | GOBP-CIRCULATORY_SYSTEM_PROCESS                   | 5             | 0.426402 | 0.993006 | 0.405844  | 1.000000  | 1.000      |       |
| 98   | GOBP-INSULIN_SECRETION                            | 7             | 0.365790 | 0.989077 | 0.417476  | 1.000000  | 1.000      |       |
| 99   | REACTOME-NEUTROPHIL_DEGRANULATION                 | R-RNO-6798695 | 6        | 0.378049 | 0.988374  | 0.451389  | 1.000000   | 1.000 |
| 100  | GOBP-POSITIVE_REGULATION_OF_EPITHELIAL_CELL_PR... | 7             | 0.358025 | 0.985677 | 0.407692  | 1.000000  | 1.000      |       |
| 101  | GOBP-PEPTIDE_HORMONE_SECRETION                    | 7             | 0.365790 | 0.984920 | 0.444840  | 1.000000  | 1.000      |       |
| 102  | GOBP-REGULATION_OF_CELL_CYCLE_PROCESS             | 5             | 0.399378 | 0.983288 | 0.448276  | 1.000000  | 1.000      |       |
| 103  | GOBP-MULTICELLULAR_ORGANISM_REPRODUCTION          | 12            | 0.285784 | 0.980875 | 0.468402  | 1.000000  | 1.000      |       |
| 104  | GOBP-NEGATIVE_REGULATION_OF_TRANSCRIPTION_BY_R... | 10            | 0.326612 | 0.976803 | 0.456522  | 1.000000  | 1.000      |       |
| 105  | GOBP-RESPONSE_TO_NICOTINE                         | 7             | 0.361004 | 0.976342 | 0.469751  | 1.000000  | 1.000      |       |
| 106  | GOBP-REGULATION_OF_NEUROTRANSMITTER_TRANSPORT     | 6             | 0.381196 | 0.976023 | 0.480000  | 1.000000  | 1.000      |       |
| 107  | GOBP-POSITIVE_REGULATION_OF_RESPONSE_TO_EXTERN... | 9             | 0.327050 | 0.975590 | 0.444915  | 1.000000  | 1.000      |       |
| 108  | GOBP-PROTEIN_AUTOPHOSPHORYLATION                  | 5             | 0.409639 | 0.973133 | 0.453642  | 1.000000  | 1.000      |       |
| 109  | GOBP-CELL_ACTIVATION_INVOLVED_IN_IMMUNE_RESPONSE  | 6             | 0.378049 | 0.972605 | 0.490260  | 1.000000  | 1.000      |       |
| 110  | GOBP-NEURON_MIGRATION                             | 5             | 0.409639 | 0.969626 | 0.437700  | 1.000000  | 1.000      |       |
| 111  | GOBP-MYELOID_LEUKOCYTE-MEDIATED IMMUNITY          | 6             | 0.378049 | 0.968809 | 0.489286  | 1.000000  | 1.000      |       |
| 112  | GOBP-NEGATIVE_REGULATION_OF_PROTEIN_MODIFICATI... | 10            | 0.304006 | 0.964258 | 0.496154  | 1.000000  | 1.000      |       |
| 113  | GOBP-NEGATIVE_REGULATION_OF_SIGNALING             | 21            | 0.240151 | 0.961587 | 0.509554  | 1.000000  | 1.000      |       |
| 114  | GOBP-MATERNAL_PROCESS_INVOLVED_IN_FEMALE_PREGN... | 5             | 0.408584 | 0.960171 | 0.470968  | 1.000000  | 1.000      |       |
| 115  | GOBP-REGULATION_OF_ORGAN_GROWTH                   | 5             | 0.397590 | 0.957730 | 0.478395  | 1.000000  | 1.000      |       |
| 116  | GOBP-IN-UTERO-EMBRYONIC_DEVELOPMENT               | 8             | 0.337500 | 0.957276 | 0.505618  | 1.000000  | 1.000      |       |
| 117  | GOBP-MAINTENANCE_OF_LOCATION                      | 7             | 0.351857 | 0.954443 | 0.510949  | 1.000000  | 1.000      |       |
| 118  | GOBP-REGULATION_OF-CARBOHYDRATE_BIOSYNTHETIC_P... | 5             | 0.397590 | 0.952087 | 0.467320  | 1.000000  | 1.000      |       |
| 119  | REACTOME-SIGNALING_BY_WNT                         | R-RNO-195721  | 7        | 0.345679 | 0.946157  | 0.503521  | 1.000000   | 1.000 |
| 120  | GOBP-REGULATION_OF_MITOTIC_CELL_CYCLE             | 5             | 0.398390 | 0.942650 | 0.500000  | 1.000000  | 1.000      |       |
| 121  | GOBP-REGULATION_OF-CARBOHYDRATE_METABOLIC_PROCESS | 5             | 0.397590 | 0.941609 | 0.507886  | 1.000000  | 1.000      |       |
| 122  | GOBP-POSITIVE_REGULATION_OF_ESTABLISHMENT_OF_P... | 5             | 0.397590 | 0.936090 | 0.512739  | 1.000000  | 1.000      |       |
| 123  | GOBP-NEUROINFLAMMATORY_RESPONSE                   | 5             | 0.397590 | 0.931265 | 0.529231  | 1.000000  | 1.000      |       |
| 124  | GOBP-CELLULAR_RESPONSE_TO_OXYGEN-CONTAINING_CO... | 29            | 0.206252 | 0.930143 | 0.559055  | 1.000000  | 1.000      |       |
| 125  | GOBP-ORGANONITROGEN_COMPOUND_BIOSYNTHETIC_PROCESS | GO-1901701    | 13       | 0.266667 | 0.927968  | 0.566667  | 1.000000   | 1.000 |
| 126  | GOBP-POSITIVE_REGULATION_OF_PHOSPHATIDYLINOSIT... | GO-0014068    | 5        | 0.397590 | 0.927255  | 0.520767  | 1.000000   | 1.000 |

Continuation of Table S13

| NAME                                                  | ID           | SIZE | ES       | NES      | NOM.p.val | FDR.q.val | FWER.p.val |
|-------------------------------------------------------|--------------|------|----------|----------|-----------|-----------|------------|
| 127 GOBP-ORGAN_GROWTH                                 | GO-0035265   | 5    | 0.397590 | 0.917706 | 0.539855  | 1.000000  | 1.000      |
| 128 GOBP-MUSCLE-CELL-DEVELOPMENT                      | GO-0055001   | 5    | 0.385542 | 0.916988 | 0.545150  | 1.000000  | 1.000      |
| 129 GOBP-LONG-TERM-SYNAPTIC-DEPRESSION                | GO-0060292   | 5    | 0.385556 | 0.915172 | 0.510972  | 1.000000  | 1.000      |
| 130 GOBP-PROTEIN-MODIFICATION-BY-SMALL-PROTEIN-CON... | GO-0032446   | 6    | 0.360075 | 0.913811 | 0.571885  | 1.000000  | 1.000      |
| 131 GOBP-PROTEIN-MODIFICATION-BY-SMALL-PROTEIN-CON... | GO-0070647   | 7    | 0.332776 | 0.913194 | 0.588235  | 1.000000  | 1.000      |
| 132 GOBP-SPROUTING-ANGIOGENESIS                       | GO-0002040   | 5    | 0.394763 | 0.911516 | 0.535503  | 1.000000  | 1.000      |
| 133 GOBP-REGULATION-OF-PROTEIN-MODIFICATION-PROCESS   | GO-0031399   | 29   | 0.209465 | 0.910855 | 0.605839  | 1.000000  | 1.000      |
| 134 GOBP-REGULATION-OF-CELLULAR-COMPONENT-MOVEMENT    | GO-0051270   | 15   | 0.245556 | 0.909407 | 0.630769  | 1.000000  | 1.000      |
| 135 GOBP-PRL-MIRNA-TRANSCRIPTION-BY-RNA-POLYMERASE-II | GO-0061614   | 7    | 0.323428 | 0.906663 | 0.581132  | 1.000000  | 1.000      |
| 136 GOBP-GLUCOSE-METABOLIC-PROCESS                    | GO-0006006   | 6    | 0.351847 | 0.902609 | 0.600000  | 1.000000  | 1.000      |
| 137 GOBP-TISSUE-HOMEOSTASIS                           | GO-0001894   | 5    | 0.385542 | 0.902144 | 0.574074  | 1.000000  | 1.000      |
| 138 GOBP-CARBOHYDRATE-BIOSYNTHETIC-PROCESS            | GO-0016051   | 5    | 0.397590 | 0.899090 | 0.571031  | 1.000000  | 1.000      |
| 139 GOBP-REGULATION-OF-HORMONE-SECRETION              | GO-0046883   | 8    | 0.321656 | 0.898972 | 0.575758  | 1.000000  | 1.000      |
| 140 GOBP-POSITIVE-REGULATION-OF-PRL-MIRNA-TRANSCRI... | GO-1902895   | 7    | 0.323428 | 0.894710 | 0.562044  | 1.000000  | 1.000      |
| 141 GOBP-POSITIVE-REGULATION-OF-ENDOTHELIAL-CELL-P... | GO-0001938   | 6    | 0.353658 | 0.893448 | 0.605960  | 1.000000  | 1.000      |
| 142 GOBP-SKELETAL-MUSCLE-ORGAN-DEVELOPMENT            | GO-0060538   | 5    | 0.385542 | 0.892829 | 0.575949  | 1.000000  | 1.000      |
| 143 GOBP-NEUROTRANSMITTER-SECRETION                   | GO-0007269   | 6    | 0.351443 | 0.890271 | 0.612245  | 1.000000  | 1.000      |
| 144 GOBP-CYTOKINE-PRODUCTION                          | GO-0001816   | 10   | 0.275555 | 0.884713 | 0.608696  | 1.000000  | 1.000      |
| 145 GOBP-MONOSACCHARIDE-METABOLIC-PROCESS             | GO-0005996   | 6    | 0.351847 | 0.882583 | 0.565693  | 1.000000  | 1.000      |
| 146 GOBP-POSITIVE-REGULATION-OF-CYTOKINE-PRODUCTION   | GO-0001819   | 7    | 0.318705 | 0.882047 | 0.580882  | 1.000000  | 1.000      |
| 147 GOBP-NEGATIVE-REGULATION-OF-RESPONSE-TO-STIMULUS  | GO-0048585   | 16   | 0.226430 | 0.880522 | 0.646707  | 1.000000  | 1.000      |
| 148 GOBP-CELLULAR-MACROMOLECULE-CATABOLIC-PROCESS     | GO-0044265   | 6    | 0.341463 | 0.874619 | 0.559871  | 1.000000  | 1.000      |
| 149 GOBP-RESPONSE-TO-BIOTIC-STIMULUS                  | GO-0009607   | 17   | 0.228605 | 0.874089 | 0.650538  | 1.000000  | 1.000      |
| 150 GOBP-NEGATIVE-REGULATION-OF-NUCLEOBASE-CONTAIN... | GO-0045934   | 13   | 0.254257 | 0.871554 | 0.654545  | 1.000000  | 1.000      |
| 151 GOBP-RESPONSE-TO-INSULIN                          | GO-0032868   | 5    | 0.368194 | 0.870799 | 0.589595  | 1.000000  | 1.000      |
| 152 GOBP-RESPONSE-TO-ALKALOID                         | GO-0043279   | 5    | 0.368372 | 0.870473 | 0.608434  | 1.000000  | 1.000      |
| 153 GOBP-REGULATION-OF-CELLULAR-RESPONSE-TO-STRESS    | GO-0080135   | 9    | 0.286117 | 0.869576 | 0.660517  | 1.000000  | 1.000      |
| 154 GOBP-PROTEIN-DEPHOSPHORYLATION                    | GO-0006470   | 7    | 0.315974 | 0.869000 | 0.642857  | 1.000000  | 1.000      |
| 155 GOBP-PEPTIDE-SECRETION                            | GO-0002790   | 9    | 0.281645 | 0.866491 | 0.628352  | 1.000000  | 1.000      |
| 156 GOBP-POSITIVE-REGULATION-OF-PROTEIN-PHOSPHORYL... | GO-0001934   | 23   | 0.201080 | 0.862527 | 0.720000  | 1.000000  | 1.000      |
| 157 GOBP-POSITIVE-REGULATION-OF-NEURON-DEATH          | GO-1901216   | 5    | 0.362233 | 0.862181 | 0.588757  | 1.000000  | 1.000      |
| 158 GOBP-REGULATION-OF-VESICLE-MEDIATED-TRANSPORT     | GO-0060627   | 12   | 0.255489 | 0.860303 | 0.699074  | 1.000000  | 1.000      |
| 159 GOBP-RESPONSE-TO-CALCIUM-ION                      | GO-0051592   | 6    | 0.329268 | 0.859991 | 0.653430  | 1.000000  | 1.000      |
| 160 GOBP-ORGANIC-ACID-METABOLIC-PROCESS               | GO-0006082   | 7    | 0.313544 | 0.857757 | 0.648855  | 1.000000  | 1.000      |
| 161 GOBP-LEUKOCYTE-DIFFERENTIATION                    | GO-0002521   | 15   | 0.226083 | 0.855127 | 0.664865  | 1.000000  | 1.000      |
| 162 REACTOME-OPIOID-SIGNALING                         | R-RNO-111885 | 12   | 0.250000 | 0.848256 | 0.652381  | 1.000000  | 1.000      |
| 163 GOBP-REGULATION-OF-PHOSPHOLIPASE-ACTIVITY         | GO-0010517   | 6    | 0.320891 | 0.847567 | 0.651007  | 1.000000  | 1.000      |
| 164 GOBP-REGULATION-OF-FAT-CELL-DIFFERENTIATION       | GO-0045598   | 6    | 0.326866 | 0.847358 | 0.645270  | 1.000000  | 1.000      |
| 165 GOBP-ORGANOPHOSPHATE-METABOLIC-PROCESS            | GO-0019637   | 7    | 0.308642 | 0.839576 | 0.642857  | 1.000000  | 1.000      |
| 166 GOBP-DEPHOSPHORYLATION                            | GO-0016311   | 7    | 0.315974 | 0.837657 | 0.656489  | 1.000000  | 1.000      |
| 167 GOBP-REGULATION-OF-LIPASE-ACTIVITY                | GO-0060191   | 6    | 0.320891 | 0.834725 | 0.694545  | 1.000000  | 1.000      |
| 168 GOBP-POSITIVE-REGULATION-OF-SMALL-MOLECULE-MET... | GO-0062013   | 5    | 0.353934 | 0.833634 | 0.672956  | 1.000000  | 1.000      |
| 169 GOBP-REPRODUCTIVE-SYSTEM-DEVELOPMENT              | GO-0061458   | 6    | 0.329268 | 0.828429 | 0.667797  | 1.000000  | 1.000      |

Continuation of Table S13

| NAME                                                    | ID            | SIZE | ES       | NES      | NOM.p.val | FDR.q.val | FWER.p.val |
|---------------------------------------------------------|---------------|------|----------|----------|-----------|-----------|------------|
| 170 GOBP-POSITIVE-REGULATION_OF_PROTEIN-MODIFICATION... | GO-0031401    | 23   | 0.201080 | 0.826885 | 0.711656  | 1.000000  | 1.000      |
| 171 GOBP-REGULATION_OF_LIPID-LOCALIZATION               | GO-1905952    | 5    | 0.342119 | 0.826247 | 0.706485  | 1.000000  | 1.000      |
| 172 REACTOME_NUCLEAR-EVENTS.KINASE-AND-TRANSCRIPTI...   | R-RNO-198725  | 11   | 0.246753 | 0.818523 | 0.786290  | 1.000000  | 1.000      |
| 173 GOBP-RESPONSE_TO_TEMPERATURE-STIMULUS               | GO-0009266    | 9    | 0.265823 | 0.815903 | 0.732000  | 1.000000  | 1.000      |
| 174 GOBP-POSITIVE-REGULATION_OF_NEURON-PROJECTION...    | GO-0010976    | 5    | 0.340959 | 0.815362 | 0.669670  | 1.000000  | 1.000      |
| 175 GOBP-REGULATION_OF_RESPONSE_TO-STRESS               | GO-0080134    | 19   | 0.202853 | 0.815264 | 0.758242  | 1.000000  | 1.000      |
| 176 GOBP-POSITIVE-REGULATION_OF_CELLULAR-PROTEIN-L...   | GO-1903829    | 7    | 0.299543 | 0.810529 | 0.688172  | 1.000000  | 1.000      |
| 177 GOBP-MUSCLE-TISSUE-DEVELOPMENT                      | GO-0060537    | 11   | 0.246753 | 0.808128 | 0.758475  | 1.000000  | 1.000      |
| 178 GOBP-HORMONE-TRANSPORT                              | GO-0009914    | 9    | 0.269563 | 0.806984 | 0.722846  | 1.000000  | 1.000      |
| 179 GOBP-HOMEOSTATIC-PROCESS                            | GO-0042592    | 31   | 0.181896 | 0.806767 | 0.762712  | 1.000000  | 1.000      |
| 180 GOBP-PEPTIDYL-SERINE-MODIFICATION                   | GO-0018209    | 12   | 0.236842 | 0.804434 | 0.754167  | 1.000000  | 1.000      |
| 181 GOBP-DEFENSE-RESPONSE                               | GO-0006952    | 19   | 0.204479 | 0.802198 | 0.805031  | 1.000000  | 1.000      |
| 182 GOBP-RESPONSE_TO_TUMOR-NECROSIS-FACTOR              | GO-0034612    | 7    | 0.293054 | 0.801823 | 0.763441  | 1.000000  | 1.000      |
| 183 GOBP-IMMUNE-SYSTEM-DEVELOPMENT                      | GO-0002520    | 17   | 0.211268 | 0.799547 | 0.754717  | 1.000000  | 1.000      |
| 184 GOBP-ORGANIC-HYDROXY-COMPOUND-METABOLIC-PROCESS     | GO-1901615    | 7    | 0.293523 | 0.797391 | 0.738351  | 1.000000  | 1.000      |
| 185 GOBP-NEGATIVE-REGULATION_OF_CYSTEINE-TYPE-ENDO...   | GO-2000117    | 5    | 0.333518 | 0.794337 | 0.710884  | 1.000000  | 1.000      |
| 186 GOBP-VASCULATURE-DEVELOPMENT                        | GO-0001944    | 7    | 0.201569 | 0.792881 | 0.789744  | 1.000000  | 1.000      |
| 187 GOBP-POSITIVE-REGULATION_OF_IMMUNE-SYSTEM-PROCESS   | GO-0002684    | 18   | 0.195830 | 0.789344 | 0.801242  | 1.000000  | 1.000      |
| 188 REACTOME-INTEGRATION_OF_ENERGY-METABOLISM           | R-RNO-163685  | 5    | 0.337349 | 0.787045 | 0.699690  | 1.000000  | 1.000      |
| 189 GOBP-NEGATIVE-REGULATION_OF_CELL-POPULATION_PR...   | GO-0008285    | 9    | 0.259077 | 0.786441 | 0.782443  | 1.000000  | 1.000      |
| 190 GOBP-VESICLE-MEDIATED-TRANSPORT_IN-SYNAPSE          | GO-0099003    | 7    | 0.280546 | 0.782036 | 0.740072  | 1.000000  | 1.000      |
| 191 GOBP-IMPORT_INTO-CELL                               | GO-0098657    | 6    | 0.304878 | 0.776063 | 0.786408  | 1.000000  | 1.000      |
| 192 GOBP-REGULATION_OF_CELL-CYCLE                       | GO-0051726    | 13   | 0.219995 | 0.774998 | 0.798030  | 1.000000  | 1.000      |
| 193 GOBP-INFLAMMATORY-RESPONSE                          | GO-0006954    | 12   | 0.231622 | 0.774764 | 0.764940  | 1.000000  | 1.000      |
| 194 GOBP-CELLULAR-RESPONSE_TO-ABIOTIC-STIMULUS          | GO-0071214    | 7    | 0.289581 | 0.774728 | 0.756944  | 1.000000  | 1.000      |
| 195 GOBP-REGULATION_OF_NEUROTRANSMITTER-LEVELS          | GO-0001505    | 7    | 0.283994 | 0.774473 | 0.762542  | 1.000000  | 1.000      |
| 196 GOBP-CELL-MIGRATION                                 | GO-0016477    | 22   | 0.186293 | 0.771530 | 0.788889  | 1.000000  | 1.000      |
| 197 GOBP-REGULATION_OF_PROTEIN-BINDING                  | GO-0043393    | 7    | 0.283951 | 0.769649 | 0.742537  | 1.000000  | 1.000      |
| 198 GOBP-ESTABLISHMENT_OF_PROTEIN-LOCALIZATION          | GO-0045184    | 18   | 0.186380 | 0.767593 | 0.848485  | 1.000000  | 1.000      |
| 199 GOBP-GAMETE-GENERATION                              | GO-0007276    | 9    | 0.256660 | 0.766181 | 0.717949  | 1.000000  | 1.000      |
| 200 GOBP-RESPONSE_TO_LIPID                              | GO-0033993    | 19   | 0.189719 | 0.763951 | 0.787356  | 1.000000  | 1.000      |
| 201 GOBP-OSTEOBLAST-DIFFERENTIATION                     | GO-0001649    | 5    | 0.325301 | 0.761783 | 0.764706  | 1.000000  | 1.000      |
| 202 GOBP-REGULATION_OF_DNA-BINDING-TRANSCRIPTION_F...   | GO-0051090    | 16   | 0.205669 | 0.757254 | 0.837696  | 1.000000  | 1.000      |
| 203 GOBP-PROTEIN-LOCALIZATION_TO-ORGANELLE              | GO-0033365    | 9    | 0.252003 | 0.757238 | 0.815574  | 1.000000  | 1.000      |
| 204 REACTOME-INTRACELLULAR-SIGNALING_BY-SECOND-MES...   | R-RNO-9006925 | 15   | 0.205479 | 0.756747 | 0.839024  | 1.000000  | 1.000      |
| 205 GOBP-EXOCYTOSIS                                     | GO-0006887    | 11   | 0.230617 | 0.754101 | 0.798246  | 1.000000  | 1.000      |
| 206 GOBP-NEUROTRANSMITTER-TRANSPORT                     | GO-0006836    | 7    | 0.283994 | 0.750662 | 0.818182  | 1.000000  | 1.000      |
| 207 GOBP-CIRCULATORY-SYSTEM-DEVELOPMENT                 | GO-0072359    | 21   | 0.180914 | 0.747816 | 0.840491  | 1.000000  | 1.000      |
| 208 GOBP-POSITIVE-REGULATION_OF_PEPTIDYL-SERINE_PH...   | GO-0033138    | 8    | 0.262348 | 0.745399 | 0.799228  | 1.000000  | 1.000      |
| 209 GOBP-REGULATION_OF_PEPTIDYL-SERINE-PHOSPHORYLA...   | GO-0033135    | 8    | 0.262348 | 0.744444 | 0.832714  | 1.000000  | 1.000      |
| 210 GOBP-RESPONSE_TO-PEPTIDE                            | GO-1901652    | 18   | 0.192842 | 0.737911 | 0.856322  | 1.000000  | 1.000      |
| 211 GOBP-POSITIVE-REGULATION_OF_SECRETION               | GO-0051047    | 6    | 0.285577 | 0.735848 | 0.844884  | 1.000000  | 1.000      |
| 212 GOBP-PEPTIDYL-LYSINE-MODIFICATION                   | GO-0018205    | 5    | 0.306102 | 0.734276 | 0.818182  | 1.000000  | 1.000      |

Continuation of Table S13

| NAME | ID                                                | SIZE | ES       | NES      | NOM.p.val | FDR.q.val | FWER.p.val |
|------|---------------------------------------------------|------|----------|----------|-----------|-----------|------------|
| 213  | GOBP-MULTI-MULTICELLULAR-ORGANISM-PROCESS         | 8    | 0.254816 | 0.734001 | 0.797753  | 1.000000  | 1.000      |
| 214  | GOBP-POSTTRANSCRIPTIONAL-REGULATION-OF_GENE.EX... | 8    | 0.262097 | 0.732178 | 0.836957  | 1.000000  | 1.000      |
| 215  | GOBP-RESPONSE-TO-BACTERIUM                        | 13   | 0.208473 | 0.731638 | 0.841346  | 1.000000  | 1.000      |
| 216  | GOBP-REGULATION-OF_OSTEOCLAST-DIFFERENTIATION     | 5    | 0.316704 | 0.731299 | 0.819079  | 1.000000  | 1.000      |
| 217  | GOBP-REGULATION-OF_RESPONSE-TO-EXTERNAL-STIMULUS  | 15   | 0.198920 | 0.729445 | 0.888350  | 1.000000  | 1.000      |
| 218  | GOBP-MONOAMINE-TRANSPORT                          | 5    | 0.309087 | 0.727351 | 0.796178  | 1.000000  | 1.000      |
| 219  | GOBP-ANATOMICAL-STRUCTURE-FORMATION-INVOLVED_I... | 20   | 0.182319 | 0.726442 | 0.883333  | 1.000000  | 1.000      |
| 220  | REACTOME-NGF-STIMULATED-TRANSCRIPTION             | 9    | 0.240506 | 0.725770 | 0.841202  | 1.000000  | 1.000      |
| 221  | GOBP-RESPONSE-TO-MOLECULE-OF_BACTERIAL-ORIGIN     | 13   | 0.208473 | 0.721411 | 0.861472  | 1.000000  | 1.000      |
| 222  | REACTOME-ANTI-INFLAMMATORY-RESPONSE-FAVOURING...  | 5    | 0.295695 | 0.720439 | 0.864112  | 1.000000  | 1.000      |
| 223  | GOBP-MUSCLE-ORGAN-DEVELOPMENT                     | 9    | 0.240506 | 0.717366 | 0.835878  | 1.000000  | 1.000      |
| 224  | GOBP-MYELOID-CELL-DIFFERENTIATION                 | 13   | 0.200000 | 0.716302 | 0.868020  | 1.000000  | 1.000      |
| 225  | GOBP-POSITIVE-REGULATION-OF_ION-TRANSPORT         | 17   | 0.184707 | 0.713772 | 0.835979  | 1.000000  | 1.000      |
| 226  | REACTOME-G-PROTEIN-MEDIATED-EVENTS                | 9    | 0.240506 | 0.712580 | 0.851711  | 1.000000  | 1.000      |
| 227  | GOBP-CELLULAR-RESPONSE-TO-LIPID                   | 15   | 0.196834 | 0.711133 | 0.867299  | 1.000000  | 1.000      |
| 228  | GOBP-RESPONSE-TO-HORMONE                          | 20   | 0.178921 | 0.710022 | 0.875598  | 1.000000  | 1.000      |
| 229  | GOBP-PURINE-CONTAINING-COMPOUND-METABOLIC-PROCESS | 5    | 0.301205 | 0.709762 | 0.823529  | 1.000000  | 1.000      |
| 230  | GOBP-POSITIVE-REGULATION-OF_NUCLEOBASE-CONTAIN... | 28   | 0.156521 | 0.708527 | 0.928571  | 1.000000  | 1.000      |
| 231  | GOBP-INTRACELLULAR-TRANSPORT                      | 11   | 0.205048 | 0.700831 | 0.896396  | 1.000000  | 1.000      |
| 232  | GOBP-REGULATION-OF_IMMUNE-SYSTEM-PROCESS          | 21   | 0.002682 | 0.691734 | 0.926471  | 1.000000  | 1.000      |
| 233  | REACTOME-PTEN-REGULATION                          | 5    | 0.292803 | 0.688775 | 0.849315  | 1.000000  | 1.000      |
| 234  | GOBP-POSITIVE-REGULATION-OF_DNA-BINDING-TRANSC... | 10   | 0.220355 | 0.685448 | 0.902542  | 1.000000  | 1.000      |
| 235  | GOBP-ENDOCYTOSIS                                  | 8    | 0.238350 | 0.684700 | 0.84615   | 1.000000  | 1.000      |
| 236  | GOBP-SEXUAL-REPRODUCTION                          | 10   | 0.216397 | 0.682760 | 0.911017  | 1.000000  | 1.000      |
| 237  | GOBP-RESPONSE-TO-ENDOGENOUS-STIMULUS              | 34   | 0.148491 | 0.682056 | 0.923077  | 1.000000  | 1.000      |
| 238  | GOBP-RESPONSE-TO-HEAT                             | 7    | 0.259259 | 0.681657 | 0.855634  | 1.000000  | 1.000      |
| 239  | GOBP-REGULATION-OF-ANION-TRANSMEMBRANE-TRANSPORT  | 5    | 0.277308 | 0.678854 | 0.888217  | 1.000000  | 1.000      |
| 240  | GOBP-REGULATION-OF_PHOSPHOLIPASE_C-ACTIVITY       | 5    | 0.277108 | 0.672640 | 0.910891  | 1.000000  | 1.000      |
| 241  | GOBP-POSITIVE-REGULATION-OF_BIOSYNTHETIC-PROCESS  | 27   | 0.152424 | 0.670750 | 0.937500  | 1.000000  | 1.000      |
| 242  | GOBP-POSITIVE-REGULATION-OF_LIPASE-ACTIVITY       | 5    | 0.277108 | 0.661533 | 0.892857  | 1.000000  | 1.000      |
| 243  | GOBP-RESPONSE-TO-KETONE                           | 7    | 0.246020 | 0.660559 | 0.930909  | 1.000000  | 1.000      |
| 244  | GOBP-ACTIN-FILAMENT-BASED-PROCESS                 | 7    | 0.233478 | 0.655700 | 0.936090  | 1.000000  | 1.000      |
| 245  | REACTOME-EXTRA-NUCLEAR-ESTROGEN-SIGNALING         | 7    | 0.234568 | 0.652697 | 0.922535  | 1.000000  | 1.000      |
| 246  | GOBP-ANION-TRANSMEMBRANE-TRANSPORT                | 7    | 0.246914 | 0.650432 | 0.913534  | 1.000000  | 1.000      |
| 247  | GOBP-INOSITOL-LIPID-MEDIATED-SIGNALING            | 8    | 0.225000 | 0.650068 | 0.937743  | 1.000000  | 1.000      |
| 248  | GOBP-RESPONSE-TO-OXYGEN-CONTAINING-COMPOUND       | 39   | 0.138749 | 0.649540 | 0.973684  | 1.000000  | 1.000      |
| 249  | GOBP-TRANSMEMBRANE-RECEPTOR-PROTEIN-SERINE-THR... | 6    | 0.246771 | 0.646403 | 0.922819  | 1.000000  | 1.000      |
| 250  | GOBP-SKIN-DEVELOPMENT                             | 5    | 0.261893 | 0.643392 | 0.946844  | 1.000000  | 1.000      |
| 251  | HALLMARK-TNFA-SIGNALING-VIA-NFKB                  | 14   | 0.175742 | 0.614026 | 0.938967  | 1.000000  | 1.000      |
| 252  | GOBP-RESPIRATORY-SYSTEM-DEVELOPMENT               | 6    | 0.231707 | 0.606982 | 0.949833  | 1.000000  | 1.000      |
| 253  | GOBP-OSTEOCLAST-DIFFERENTIATION                   | 6    | 0.235081 | 0.595391 | 0.966777  | 1.000000  | 1.000      |
| 254  | GOBP-REGULATION-OF_APOPTOTIC-SIGNALING-PATHWAY    | 10   | 0.189368 | 0.587928 | 0.972763  | 1.000000  | 1.000      |
| 255  | GOBP-NEGATIVE-REGULATION-OF_CELL-DIFFERENTIATION  | 13   | 0.165930 | 0.586558 | 0.986607  | 1.000000  | 1.000      |

Continuation of Table S13

| NAME | ID                                                | SIZE          | ES | NES       | NOM.p.val | FDR.q.val | FWER.p.val |
|------|---------------------------------------------------|---------------|----|-----------|-----------|-----------|------------|
| 256  | GOBP-CELL-CYCLE                                   | GO-0007049    | 21 | 0.145012  | 0.586369  | 0.994253  | 1.000000   |
| 257  | GOBP-CELL-CELL-SIGNALING-BY-WNT                   | GO-0198738    | 7  | 0.208614  | 0.583451  | 0.982456  | 1.000000   |
| 258  | GOBP-NEGATIVE-REGULATION-OF-DEVELOPMENTAL-PROCESS | GO-0051093    | 13 | 0.165930  | 0.583417  | 0.995305  | 1.000000   |
| 259  | GOBP-POSITIVE-REGULATION-OF-TRANSCRIPTION-BY-R... | GO-0045944    | 24 | 0.140625  | 0.578241  | 1.000000  | 1.000000   |
| 260  | GOBP-NEGATIVE-REGULATION-OF-APOPTOTIC-SIGNALIN... | GO-2001234    | 7  | 0.220223  | 0.577453  | 0.961538  | 1.000000   |
| 261  | GOBP-REGULATION-OF-VASCULAR-ASSOCIATED-SMOOTH...  | GO-1904705    | 5  | 0.239620  | 0.573663  | 0.983051  | 1.000000   |
| 262  | HALLMARK-P13K-AKT-MTOR-SIGNALING                  | M5923         | 6  | 0.219512  | 0.559363  | 0.983819  | 1.000000   |
| 263  | GOBP-MUSCLE-CELL-PROLIFERATION                    | GO-0033002    | 8  | 0.187500  | 0.557557  | 0.975207  | 1.000000   |
| 264  | GOBP-LIPID-LOCALIZATION                           | GO-0010876    | 10 | 0.175669  | 0.550018  | 0.996032  | 1.000000   |
| 265  | GOBP-POSITIVE-REGULATION-OF-ORGANELLE-ORGANIZA... | GO-0010638    | 10 | 0.173917  | 0.548175  | 0.982759  | 1.000000   |
| 266  | GOBP-REGULATION-OF-WNT-SIGNALING-PATHWAY          | GO-0030111    | 5  | 0.228027  | 0.546103  | 0.996678  | 1.000000   |
| 267  | GOBP-SMOOTH-MUSCLE-CELL-PROLIFERATION             | GO-0048659    | 6  | 0.209084  | 0.545528  | 0.980328  | 1.000000   |
| 268  | GOBP-REGULATION-OF-ANION-TRANSPORT                | GO-0044070    | 20 | 0.136901  | 0.544324  | 0.994048  | 1.000000   |
| 269  | GOBP-POSITIVE-REGULATION-OF-SMOOTH-MUSCLE-CELL... | GO-0048661    | 5  | 0.223978  | 0.535401  | 0.993671  | 0.997532   |
| 270  | GOBP-ACTIVATION-OF-PROTEIN-KINASE-ACTIVITY        | GO-0032147    | 11 | 0.155590  | 0.516693  | 1.000000  | 0.997329   |
| 271  | GOBP-INTRACELLULAR-PROTEIN-TRANSPORT              | GO-0006886    | 9  | 0.164557  | 0.498538  | 0.988550  | 0.996400   |
| 272  | GOBP-IMMUNE-EFFECTOR-PROCESS                      | GO-0002252    | 10 | -0.134766 | -0.345584 | 1.000000  | 0.999880   |
| 273  | GOBP-CELLULAR-RESPONSE-TO-HORMONE-STIMULUS        | GO-0032870    | 11 | -0.150731 | -0.392427 | 1.000000  | 1.000000   |
| 274  | GOBP-REGULATION-OF-EXTRINSIC-APOPTOTIC-SIGNAL...  | GO-2001236    | 6  | -0.186094 | -0.403957 | 0.998613  | 1.000000   |
| 275  | REACTOME-TRANSCRIPTIONAL-REGULATION-OF-WHITE-A... | R-RNO-381340  | 6  | -0.212786 | -0.462341 | 0.997097  | 1.000000   |
| 276  | GOBP-REGULATION-OF-CELLULAR-AMIDE-METABOLIC-PR... | GO-0034248    | 9  | -0.189715 | -0.467366 | 0.992147  | 1.000000   |
| 277  | GOBP-REGULATION-OF-ORGANELLE-ORGANIZATION         | GO-0033043    | 14 | -0.168282 | -0.467599 | 0.995000  | 1.000000   |
| 278  | GOBP-CELLULAR-RESPONSE-TO-BIOTIC-STIMULUS         | GO-0071216    | 8  | -0.198581 | -0.468590 | 0.993216  | 1.000000   |
| 279  | REACTOME-ADAPTIVE-IMMUNE-SYSTEM                   | R-RNO-1280218 | 9  | -0.191698 | -0.471214 | 0.989348  | 1.000000   |
| 280  | GOBP-RESPONSE-TO-INTERLEUKIN-1                    | GO-0070555    | 5  | -0.229479 | -0.473619 | 0.994444  | 1.000000   |
| 281  | GOBP-CELLULAR-RESPONSE-TO-MOLECULE-OF-BACTERIA... | GO-0071219    | 8  | -0.198581 | -0.474250 | 0.990305  | 1.000000   |
| 282  | GOBP-PEPTIDE-METABOLIC-PROCESS                    | GO-0006518    | 12 | -0.183110 | -0.486386 | 0.978205  | 1.000000   |
| 283  | GOBP-REGULATION-OF-PROTEIN-LOCALIZATION           | GO-0032880    | 18 | -0.167688 | -0.489118 | 0.983503  | 1.000000   |
| 284  | GOBP-POSITIVE-REGULATION-OF-PROTEIN-SERINE-THR... | GO-0071902    | 9  | -0.201980 | -0.498164 | 0.985155  | 1.000000   |
| 285  | GOBP-MONONUCLEAR-CELL-DIFFERENTIATION             | GO-1903131    | 7  | -0.224790 | -0.503386 | 0.976257  | 1.000000   |
| 286  | REACTOME-INTERLEUKIN-4-AND-INTERLEUKIN-13-SIGN... | R-RNO-6785807 | 8  | -0.214935 | -0.510316 | 0.983095  | 1.000000   |
| 287  | GOBP-REGULATION-OF-PROTEIN-STABILITY              | GO-0031647    | 5  | -0.255184 | -0.519954 | 0.990085  | 1.000000   |
| 288  | GOBP-DNA-METABOLIC-PROCESS                        | GO-0008259    | 6  | -0.239383 | -0.526487 | 0.990028  | 1.000000   |
| 289  | GOBP-CELL-CELL-JUNCTION-ASSEMBLY                  | GO-0007043    | 5  | -0.256930 | -0.526981 | 0.994092  | 1.000000   |
| 290  | GOBP-CELLULAR-RESPONSE-TO-PEPTIDE                 | GO-1901653    | 13 | -0.196494 | -0.529136 | 0.975124  | 1.000000   |
| 291  | GOBP-CARDIAC-MUSCLE-TISSUE-DEVELOPMENT            | GO-0048738    | 6  | -0.242804 | -0.530971 | 0.982906  | 1.000000   |
| 292  | GOBP-REGULATION-OF-NEURON-DIFFERENTIATION         | GO-0045664    | 5  | -0.251916 | -0.532045 | 0.990085  | 1.000000   |
| 293  | GOBP-CELL-CELL-JUNCTION-ORGANIZATION              | GO-0045216    | 6  | -0.233707 | -0.533305 | 0.977077  | 1.000000   |
| 294  | GOBP-HEART-DEVELOPMENT                            | GO-0007507    | 6  | -0.242804 | -0.535297 | 0.988506  | 1.000000   |
| 295  | GOBP-REGULATION-OF-PROTEIN-SERINE-THREONINE-KI... | GO-0071900    | 12 | -0.203842 | -0.544512 | 0.959688  | 1.000000   |
| 296  | GOBP-POSITIVE-REGULATION-OF-MULTICELLULAR-ORGA... | GO-0051240    | 32 | -0.169276 | -0.545413 | 0.965792  | 1.000000   |
| 297  | GOBP-LEUKOCYTE-CELL-CELL-ADHESION                 | GO-0007159    | 6  | -0.255921 | -0.546946 | 0.974648  | 1.000000   |
| 298  | REACTOME-RHO-GTPASE-EFFECTORS                     | R-RNO-195258  | 9  | -0.222492 | -0.548346 | 0.959239  | 1.000000   |

Continuation of Table S13

| NAME | ID                                                 | SIZE | ES        | NES       | NOM.p.val | FDR.q.val | FWER.p.val |
|------|----------------------------------------------------|------|-----------|-----------|-----------|-----------|------------|
| 299  | GOBP-NEUROTROPHIN_SIGNALING_PATHWAY                | 6    | -0.252671 | -0.552026 | 0.965116  | 1.000000  | 1.000      |
| 300  | GOBP-NEUROTROPHIN_TRK_RECEPTOR_SIGNALING_PATHWAY   | 6    | -0.252671 | -0.552258 | 0.965418  | 1.000000  | 1.000      |
| 301  | REACTOME_SIGNALING_BY_RHO_GTPASES_MIRO_GTPASES...  | 9    | -0.222492 | -0.552469 | 0.967213  | 1.000000  | 1.000      |
| 302  | GOBP-POSITIVE_REGULATION_OF_MYELOID_LEUKOCYTE_...  | 6    | -0.253089 | -0.552531 | 0.964789  | 1.000000  | 1.000      |
| 303  | GOBP-EMBRYO_DEVELOPMENT                            | 14   | -0.203764 | -0.557204 | 0.965736  | 1.000000  | 1.000      |
| 304  | GOBP-REPRODUCTION                                  | 18   | -0.195183 | -0.561298 | 0.949559  | 1.000000  | 1.000      |
| 305  | GOBP-POSITIVE_REGULATION_OF_CELL_POPULATION_PR...  | 21   | -0.188474 | -0.568377 | 0.957473  | 1.000000  | 1.000      |
| 306  | GOBP-RESPONSE_TO_PEPTIDE_HORMONE                   | 13   | -0.213034 | -0.577342 | 0.947301  | 1.000000  | 1.000      |
| 307  | GOBP-REGULATION_OF_CELLULAR_PROTEIN_LOCALIZATION   | 12   | -0.222388 | -0.580566 | 0.945806  | 1.000000  | 1.000      |
| 308  | REACTOME_SIGNALING_BY_NTRK2_TRKB                   | 6    | -0.269203 | -0.581761 | 0.956091  | 1.000000  | 1.000      |
| 309  | GOBP-EPITHELIAL_DEVELOPMENT                        | 15   | -0.210201 | -0.582500 | 0.950980  | 1.000000  | 1.000      |
| 310  | GOBP-APOPTOTIC_MITOCHONDRIAL_CHANGES               | 6    | -0.268293 | -0.583587 | 0.942623  | 1.000000  | 1.000      |
| 311  | GOBP-CELLULAR_RESPONSE_TO_PEPTIDE_HORMONE_STIM...  | 9    | -0.235502 | -0.584194 | 0.953020  | 1.000000  | 1.000      |
| 312  | GOBP-CARBOHYDRATE_METABOLIC_PROCESS                | 9    | -0.231172 | -0.584253 | 0.947226  | 1.000000  | 1.000      |
| 313  | GOBP-CELLULAR_RESPONSE_TO_CADMIUM_ION              | 5    | -0.282311 | -0.584815 | 0.959762  | 1.000000  | 1.000      |
| 314  | GOBP-ORGANIC_ACID_TRANSPORT                        | 7    | -0.258741 | -0.586746 | 0.954930  | 1.000000  | 1.000      |
| 315  | GOBP-REGULATION_OF_PROTEIN_PHOSPHORYLATION         | 26   | -0.190821 | -0.588820 | 0.946449  | 1.000000  | 1.000      |
| 316  | GOBP-RESPONSE_TO_ALCOHOL                           | 11   | -0.228698 | -0.590459 | 0.951031  | 1.000000  | 1.000      |
| 317  | GOBP-TUBE_MORPHOGENESIS                            | 15   | -0.212796 | -0.594081 | 0.942118  | 1.000000  | 1.000      |
| 318  | GOBP-MUSCLE_STRUCTURE_DEVELOPMENT                  | 16   | -0.231337 | -0.594303 | 0.931336  | 1.000000  | 1.000      |
| 319  | GOBP-AMEBOIDAL_TYPE_CELL_MIGRATION                 | 11   | -0.231325 | -0.594378 | 0.924084  | 1.000000  | 1.000      |
| 320  | GOBP-REGULATION_OF_CELL_CELL_ADHESION              | 9    | -0.242315 | -0.599360 | 0.933333  | 1.000000  | 1.000      |
| 321  | GOBP-POSITIVE_REGULATION_OF_MYELOID_CELL_DIFFE...  | 7    | -0.266941 | -0.599893 | 0.942008  | 1.000000  | 1.000      |
| 322  | GOBP-RESPONSE_TO_GROWTH_FACTOR                     | 18   | -0.205535 | -0.600109 | 0.944030  | 1.000000  | 1.000      |
| 323  | GOBP-RESPONSE_TO_CADMIUM_ION                       | 6    | -0.268293 | -0.600749 | 0.951591  | 1.000000  | 1.000      |
| 324  | GOBP-REGULATION_OF_BODY_FLUID_LEVELS               | 11   | -0.233867 | -0.602086 | 0.916991  | 1.000000  | 1.000      |
| 325  | GOBP-RECEPTOR-MEDIATED_ENDOCYTOSIS                 | 6    | -0.273939 | -0.602892 | 0.930736  | 1.000000  | 1.000      |
| 326  | GOBP-RESPONSE_TO_INORGANIC_SUBSTANCE               | 19   | -0.208591 | -0.606924 | 0.926380  | 1.000000  | 1.000      |
| 327  | GOBP-POSITIVE_REGULATION_OF_CELL_PROJECTION_OR...  | 10   | -0.242937 | -0.607580 | 0.912698  | 1.000000  | 1.000      |
| 328  | GOBP-POSITIVE_REGULATION_OF_CELL_CELL_ADHESION     | 5    | -0.296853 | -0.608212 | 0.943396  | 1.000000  | 1.000      |
| 329  | REACTOME_PLATELET_ACTIVATION_SIGNALING_AND_AGG...  | 7    | -0.269794 | -0.609963 | 0.926491  | 1.000000  | 1.000      |
| 330  | GOBP-POSITIVE_REGULATION_OF_LEUKOCYTE_CELL_CELL... | 5    | -0.296853 | -0.612453 | 0.931983  | 1.000000  | 1.000      |
| 331  | GOBP-REGULATION_OF_CELL_ADHESION                   | 13   | -0.269794 | -0.613021 | 0.930719  | 1.000000  | 1.000      |
| 332  | GOBP-RECEPTOR_METABOLIC_PROCESS                    | 5    | -0.301951 | -0.614015 | 0.928994  | 1.000000  | 1.000      |
| 333  | GOBP-CELLULAR_AMIDE_METABOLIC_PROCESS              | 13   | -0.227821 | -0.617642 | 0.938383  | 1.000000  | 1.000      |
| 334  | GOBP-RECEPTOR_INTERNALIZATION                      | 5    | -0.301951 | -0.620130 | 0.933921  | 1.000000  | 1.000      |
| 335  | REACTOME_ESTROGEN_DEPENDENT_NUCLEAR_EVENTS_DOW...  | 5    | -0.306896 | -0.620840 | 0.940388  | 1.000000  | 1.000      |
| 336  | GOBP-REGULATION_OF_SECRETION                       | 14   | -0.226643 | -0.622799 | 0.910112  | 1.000000  | 1.000      |
| 337  | GOBP-REGULATION_OF_CYTOSKELETON_ORGANIZATION       | 5    | -0.304652 | -0.624357 | 0.937213  | 1.000000  | 1.000      |
| 338  | GOBP-APOPTOTIC_PROCESS                             | 35   | -0.191656 | -0.624722 | 0.929465  | 1.000000  | 1.000      |
| 339  | GOBP-POSITIVE_REGULATION_OF_CELL_ADHESION          | 7    | -0.273998 | -0.626934 | 0.916667  | 1.000000  | 1.000      |
| 340  | GOBP-NEGATIVE_REGULATION_OF_BINDING                | 6    | -0.283967 | -0.625287 | 0.925287  | 1.000000  | 1.000      |
| 341  | REACTOME_DAG_AND_IP3_SIGNALING                     | 8    | -0.264178 | -0.629021 | 0.908108  | 1.000000  | 1.000      |

Continuation of Table S13

|     | NAME                                              | ID            | SIZE | ES        | NES       | NOM.p.val | FDR.q.val | FWER.p.val |
|-----|---------------------------------------------------|---------------|------|-----------|-----------|-----------|-----------|------------|
| 342 | GOBP-POSITIVE-REGULATION-OF-HEMOPOIESIS           | GO-1903708    | 7    | -0.274618 | -0.629421 | 0.933803  | 1.000000  | 1.000      |
| 343 | GOBP-POSITIVE-REGULATION-OF-TRANSPORT             | GO-0051050    | 26   | -0.201958 | -0.629931 | 0.924617  | 1.000000  | 1.000      |
| 344 | GOBP-NEGATIVE-REGULATION-OF-PHOSPHORYLATION       | GO-0042326    | 7    | -0.269673 | -0.630261 | 0.918056  | 1.000000  | 1.000      |
| 345 | GOBP-REGULATION-OF-PROTEIN-KINASE-ACTIVITY        | GO-0045859    | 22   | -0.210358 | -0.630322 | 0.924821  | 1.000000  | 1.000      |
| 346 | GOBP-SENSORY-ORGAN-DEVELOPMENT                    | GO-0007423    | 8    | -0.261451 | -0.630941 | 0.910448  | 1.000000  | 1.000      |
| 347 | GOBP-MYELOID-LEUKOCYTE-DIFFERENTIATION            | GO-0002573    | 11   | -0.240745 | -0.633576 | 0.899619  | 1.000000  | 1.000      |
| 348 | GOBP-REGULATION-OF-MYELOID-CELL-DIFFERENTIATION   | GO-0045637    | 9    | -0.260595 | -0.634610 | 0.893793  | 1.000000  | 1.000      |
| 349 | GOBP-RHYTHMIC-PROCESS                             | GO-0048511    | 15   | -0.223861 | -0.635339 | 0.909091  | 1.000000  | 1.000      |
| 350 | GOBP-REGULATION-OF-TRANSFERASE-ACTIVITY           | GO-0051338    | 22   | -0.210358 | -0.636603 | 0.92944   | 1.000000  | 1.000      |
| 351 | REACTOME-INFECTIOUS-DISEASE                       | R-HSA-5663205 | 13   | -0.233286 | -0.637487 | 0.910141  | 1.000000  | 1.000      |
| 352 | GOBP-GLAND-DEVELOPMENT                            | GO-0048732    | 7    | -0.273537 | -0.637524 | 0.904564  | 1.000000  | 1.000      |
| 353 | GOBP-EMBRYONIC-ORGAN-DEVELOPMENT                  | GO-0048568    | 7    | -0.278018 | -0.637648 | 0.916782  | 1.000000  | 1.000      |
| 354 | GOBP-EXTRINSIC-APOPTOTIC-SIGNALING-PATHWAY        | GO-0097191    | 7    | -0.275159 | -0.639215 | 0.924016  | 1.000000  | 1.000      |
| 355 | GOBP-CARBOXYLIC-ACID-TRANSPORT                    | GO-0046942    | 6    | -0.297865 | -0.640700 | 0.911444  | 1.000000  | 1.000      |
| 356 | GOBP-AMYLOID-PRECURSOR-PROTEIN-CATABOLIC-PROCESS  | GO-0042987    | 5    | -0.313635 | -0.641880 | 0.911047  | 1.000000  | 1.000      |
| 357 | GOBP-APOPTOTIC-SIGNALING-PATHWAY                  | GO-0097190    | 15   | -0.219418 | -0.642542 | 0.895466  | 1.000000  | 1.000      |
| 358 | GOBP-POSITIVE-REGULATION-OF-PROTEIN-KINASE-ACT... | GO-00045860   | 19   | -0.230736 | -0.642381 | 0.915357  | 1.000000  | 1.000      |
| 359 | GOBP-MUSCLE-CONTRACTION                           | GO-0006936    | 5    | -0.303538 | -0.642748 | 0.931034  | 1.000000  | 1.000      |
| 360 | GOBP-NEGATIVE-REGULATION-OF-PROTEOLYSIS           | GO-0045861    | 8    | -0.273370 | -0.645770 | 0.900415  | 1.000000  | 1.000      |
| 361 | GOBP-CELLULAR-RESPONSE-TO-EXTERNAL-STIMULUS       | GO-0071496    | 10   | -0.258692 | -0.645791 | 0.904110  | 1.000000  | 1.000      |
| 362 | GOBP-AMYLOID-BETA-METABOLIC-PROCESS               | GO-0050435    | 5    | -0.313635 | -0.646333 | 0.926901  | 1.000000  | 1.000      |
| 363 | REACTOME-HEMOSTASIS                               | R-RNO-109582  | 14   | -0.239259 | -0.646844 | 0.897277  | 1.000000  | 1.000      |
| 364 | GOBP-ORGANIC-ANION-TRANSPORT                      | GO-0015711    | 6    | -0.297865 | -0.647119 | 0.906340  | 1.000000  | 1.000      |
| 365 | GOBP-SIGNAL-RELEASE                               | GO-0023061    | 14   | -0.234367 | -0.648667 | 0.887626  | 1.000000  | 1.000      |
| 366 | GOBP-ACTIVATION-OF-MAPK-ACTIVITY                  | GO-0000187    | 6    | -0.298718 | -0.648827 | 0.887784  | 1.000000  | 1.000      |
| 367 | GOBP-POSITIVE-REGULATION-OF-MAP-KINASE-ACTIVITY   | GO-0043406    | 6    | -0.298718 | -0.652095 | 0.890625  | 1.000000  | 1.000      |
| 368 | GOBP-ERK1-AND-ERK2-CASCADE                        | GO-0070371    | 5    | -0.315006 | -0.652474 | 0.902299  | 1.000000  | 1.000      |
| 369 | GOBP-AMYLOID-PRECURSOR-PROTEIN-METABOLIC-PROCESS  | GO-0042982    | 5    | -0.313635 | -0.654672 | 0.919762  | 1.000000  | 1.000      |
| 370 | REACTOME-SIGNALING-BY-RECEPTOR-TYROSINE-KINASES   | R-RNO-9006934 | 26   | -0.208386 | -0.655216 | 0.913753  | 1.000000  | 1.000      |
| 371 | GOBP-AMINO-ACID-TRANSPORT                         | GO-0006865    | 6    | -0.297865 | -0.656011 | 0.882192  | 1.000000  | 1.000      |
| 372 | GOBP-NEGATIVE-REGULATION-OF-TRANSPORT             | GO-0051051    | 13   | -0.243735 | -0.658247 | 0.891551  | 1.000000  | 1.000      |
| 373 | GOBP-CELLULAR-COMPONENT-DISASSEMBLY               | GO-0022411    | 6    | -0.304863 | -0.659169 | 0.897210  | 1.000000  | 1.000      |
| 374 | HALLMARK-ALLOGRAFT-REJECTION                      | M950          | 7    | -0.287153 | -0.662770 | 0.866571  | 1.000000  | 1.000      |
| 375 | GOBP-INTRACELLULAR-RECEPTOR-SIGNALING-PATHWAY     | GO-0030522    | 5    | -0.319670 | -0.663450 | 0.907378  | 1.000000  | 1.000      |
| 376 | REACTOME-TRANSCRIPTIONAL-REGULATION-BY_TP53       | R-RNO-3700989 | 6    | -0.305988 | -0.665919 | 0.889685  | 1.000000  | 1.000      |
| 377 | GOBP-CIRCADIEN-RHYTHM                             | GO-0007623    | 13   | -0.242158 | -0.669401 | 0.883605  | 1.000000  | 1.000      |
| 378 | GOBP-BLOOD-VESSEL-MORPHOGENESIS                   | GO-0048514    | 14   | -0.242010 | -0.672604 | 0.875792  | 1.000000  | 1.000      |
| 379 | GOBP-MULTI-ORGANISM-PROCESS                       | GO-0051704    | 16   | -0.238143 | -0.676448 | 0.885856  | 1.000000  | 1.000      |
| 380 | GOBP-EPITHELIAL-CELL-DIFFERENTIATION              | GO-0030855    | 7    | -0.294644 | -0.676880 | 0.867332  | 1.000000  | 1.000      |
| 381 | REACTOME-G-ALPHA-J-SIGNALING-EVENTS               | R-RNO-418594  | 18   | -0.241829 | -0.681996 | 0.867629  | 1.000000  | 1.000      |
| 382 | GOBP-POSITIVE-REGULATION-OF-GENE-EXPRESSION       | GO-0010628    | 16   | -0.241829 | -0.684043 | 0.875940  | 1.000000  | 1.000      |
| 383 | GOBP-CHROMOSOME-ORGANIZATION                      | GO-0051276    | 6    | -0.310535 | -0.686257 | 0.882857  | 1.000000  | 1.000      |
| 384 | GOBP-DEFENSE-RESPONSE-TO-OTHER-ORGANISM           | GO-0098542    | 9    | -0.282711 | -0.689018 | 0.848728  | 1.000000  | 1.000      |

Continuation of Table S13

|     | NAME                                               | ID            | SIZE | ES        | NES       | NOM.p.val | FDR.q.val | FWER.p.val |
|-----|----------------------------------------------------|---------------|------|-----------|-----------|-----------|-----------|------------|
| 385 | REACTOME_INTERFERON_SIGNALING                      | R-RNO-913531  | 6    | -0.316956 | -0.694171 | 0.862937  | 1.000000  | 1.000      |
| 386 | GOBP_LOCOMOTORY_BEHAVIOR                           | GO-0007626    | 7    | -0.313139 | -0.695674 | 0.856738  | 1.000000  | 1.000      |
| 387 | GOBP_REGULATION_OF_MYELOID_LEUKOCYTE_DIFFERENT...  | GO-0002761    | 8    | -0.297615 | -0.699103 | 0.840382  | 1.000000  | 1.000      |
| 388 | REACTOME_SIGNALING_BY_NUCLEAR_RECEPTORS            | R-RNO-9006931 | 8    | -0.296105 | -0.700032 | 0.847645  | 1.000000  | 1.000      |
| 389 | REACTOME_ESR_MEDIATED_SIGNALING                    | R-RNO-8939211 | 8    | -0.296105 | -0.703331 | 0.850283  | 1.000000  | 1.000      |
| 390 | REACTOME_SIGNALING_BY_GPCR                         | R-RNO-372790  | 22   | -0.233039 | -0.705576 | 0.849169  | 1.000000  | 1.000      |
| 391 | GOBP_POSITIVE_REGULATION_OF_TRANSMEMBRANE_TRAN...  | GO-0034764    | 7    | -0.305749 | -0.705832 | 0.833563  | 1.000000  | 1.000      |
| 392 | GOBP_HOMEOSTASIS_OF_NUMBER_OF_CELLS                | GO-0048872    | 5    | -0.346055 | -0.706306 | 0.882436  | 1.000000  | 1.000      |
| 393 | GOBP_POSITIVE_REGULATION_OF_CELL_DEATH             | GO-0010942    | 19   | -0.237071 | -0.706332 | 0.828125  | 1.000000  | 1.000      |
| 394 | GOBP_FATTY_ACID_TRANSPORT                          | GO-0015908    | 6    | -0.322993 | -0.710433 | 0.835425  | 1.000000  | 1.000      |
| 395 | GOBP_CELL_POPULATION_PROLIFERATION                 | GO-0008283    | 31   | -0.217964 | -0.710488 | 0.834313  | 1.000000  | 1.000      |
| 396 | GOBP_POSITIVE_REGULATION_OF_CATION_TRANSMEMBRAN... | GO-1904064    | 5    | -0.345956 | -0.710602 | 0.853727  | 1.000000  | 1.000      |
| 397 | GOBP_NUCLEOBASE_CONTAINING_SMALL_MOLECULE_META...  | GO-0055086    | 6    | -0.327393 | -0.714940 | 0.829167  | 1.000000  | 1.000      |
| 398 | GOBP_POSITIVE_REGULATION_OF_PHOSPHORUS_METABOL...  | GO-0010562    | 24   | -0.231216 | -0.716746 | 0.849882  | 1.000000  | 1.000      |
| 399 | GOBP_REGULATION_OF_MUSCLE_CELL_DIFFERENTIATION     | GO-0051147    | 6    | -0.333756 | -0.717497 | 0.842486  | 1.000000  | 1.000      |
| 400 | GOBP_NEGATIVE_REGULATION_OF_CELL_DEVELOPMENT       | GO-0010721    | 6    | -0.330506 | -0.719270 | 0.835674  | 1.000000  | 1.000      |
| 401 | GOBP_REGULATION_OF_MULTICELLULAR_ORGANISMAL_DE...  | GO-2000026    | 31   | -0.227293 | -0.722435 | 0.830080  | 1.000000  | 1.000      |
| 402 | GOBP_POSITIVE_REGULATION_OF_HYDROLASE_ACTIVITY     | GO-0051345    | 16   | -0.255473 | -0.724038 | 0.820859  | 1.000000  | 1.000      |
| 403 | GOBP_CHROMATIN_ORGANIZATION                        | GO-0006325    | 5    | -0.353719 | -0.725093 | 0.815138  | 1.000000  | 1.000      |
| 404 | GOBP_GROWTH                                        | GO-0040007    | 14   | -0.259608 | -0.726812 | 0.822194  | 1.000000  | 1.000      |
| 405 | GOBP_CELL_CELL_ADHESION                            | GO-0098609    | 14   | -0.263346 | -0.730242 | 0.824691  | 1.000000  | 1.000      |
| 406 | GOBP_POSITIVE_REGULATION_OF_CELLULAR_COMPONENT...  | GO-0051130    | 24   | -0.238189 | -0.730897 | 0.817647  | 1.000000  | 1.000      |
| 407 | GOBP_REGULATION_OF_GTPASE_ACTIVITY                 | GO-0043087    | 5    | -0.348025 | -0.731125 | 0.839763  | 1.000000  | 1.000      |
| 408 | GOBP_RESPONSE_TO_CYTOKINE                          | GO-0034097    | 23   | -0.239776 | -0.731706 | 0.825581  | 1.000000  | 1.000      |
| 409 | GOBP_NEGATIVE_REGULATION_OF_TRANSFERASE_ACTIVITY   | GO-0051348    | 5    | -0.361759 | -0.733221 | 0.833581  | 1.000000  | 1.000      |
| 410 | GOBP_ACTIVATION_OF_IMMUNE_RESPONSE                 | GO-0002253    | 5    | -0.354224 | -0.733408 | 0.819648  | 1.000000  | 1.000      |
| 411 | GOBP_NEGATIVE_REGULATION_OF_PEPTIDASE_ACTIVITY     | GO-0010466    | 6    | -0.340694 | -0.734390 | 0.833568  | 1.000000  | 1.000      |
| 412 | REACTOME_SIGNALING_BY_NTRKS                        | R-RNO-166520  | 18   | -0.248057 | -0.739366 | 0.813107  | 1.000000  | 1.000      |
| 413 | GOBP_SECRETION                                     | GO-0046903    | 24   | -0.243405 | -0.742188 | 0.820574  | 1.000000  | 1.000      |
| 414 | GOBP_NEGATIVE_REGULATION_OF_MULTICELLULAR_ORGA...  | GO-0051241    | 15   | -0.268702 | -0.747280 | 0.808132  | 1.000000  | 1.000      |
| 415 | GOBP_NEGATIVE_REGULATION_OF_KINASE_ACTIVITY        | GO-0033673    | 5    | -0.361759 | -0.749036 | 0.812772  | 1.000000  | 1.000      |
| 416 | REACTOME_DEATH_RECEPTOR_SIGNALING                  | R-RNO-73887   | 5    | -0.359991 | -0.750335 | 0.823034  | 1.000000  | 1.000      |
| 417 | GOBP_LOCOMOTION                                    | GO-0040011    | 31   | -0.234846 | -0.751881 | 0.796275  | 1.000000  | 1.000      |
| 418 | GOBP_RESPONSE_TO_OXYGEN_LEVELS                     | GO-0070482    | 8    | -0.314410 | -0.754234 | 0.766074  | 1.000000  | 1.000      |
| 419 | GOBP_POSITIVE_REGULATION_OF_MOLECULAR_FUNCTION     | GO-0044093    | 38   | -0.231138 | -0.754824 | 0.828442  | 1.000000  | 1.000      |
| 420 | GOBP_REGULATION_OF_HEMOPOIESIS                     | GO-1903706    | 10   | -0.298894 | -0.755286 | 0.783290  | 1.000000  | 1.000      |
| 421 | GOBP_MUSCLE_ADAPTATION                             | GO-0043500    | 5    | -0.368963 | -0.755514 | 0.810198  | 1.000000  | 1.000      |
| 422 | GOBP_DEVELOPMENTAL_GROWTH                          | GO-0048589    | 10   | -0.300573 | -0.756066 | 0.773263  | 1.000000  | 1.000      |
| 423 | GOBP_NEGATIVE_REGULATION_OF_TRANSMEMBRANE_TRAN...  | GO-0034763    | 6    | -0.349388 | -0.759644 | 0.776824  | 1.000000  | 1.000      |
| 424 | GOBP_RESPONSE_TO_NERVE_GROWTH_FACTOR               | GO-1990089    | 7    | -0.329110 | -0.760620 | 0.778976  | 1.000000  | 1.000      |
| 425 | GOBP_REGULATION_OF_GROWTH                          | GO-0040008    | 13   | -0.276903 | -0.761201 | 0.789541  | 1.000000  | 1.000      |
| 426 | GOBP_NEGATIVE_REGULATION_OF_NEURON_DEATH           | GO-1901215    | 11   | -0.295422 | -0.763768 | 0.804491  | 1.000000  | 1.000      |
| 427 | GOBP_REGULATION_OF_MUSCLE_ADAPTATION               | GO-0043502    | 5    | -0.368963 | -0.764256 | 0.793353  | 1.000000  | 1.000      |



Continuation of Table S13

| NAME                                                   | ID            | SIZE | ES        | NES        | NOM.p.val | FDR.q.val | FWER.p.val |
|--------------------------------------------------------|---------------|------|-----------|------------|-----------|-----------|------------|
| 428 GOBP-TUBE-DEVELOPMENT                              | GO-0035295    | 18   | -0.254150 | -0.765548  | 0.774074  | 1.000000  | 1.000      |
| 429 GOBP-POSITIVE-REGULATION-OF-TRANSFERASE-ACTIVITY   | GO-0051347    | 20   | -0.255747 | -0.765790  | 0.796569  | 1.000000  | 1.000      |
| 430 GOBP-PROTEIN-PHOSPHORYLATION                       | GO-0006468    | 34   | -0.237587 | -0.767455  | 0.782066  | 1.000000  | 1.000      |
| 431 GOBP-REGULATION-OF-CELL-DEATH                      | GO-0010941    | 34   | -0.232024 | -0.767660  | 0.783784  | 1.000000  | 1.000      |
| 432 GOBP-CYTOKINE-MEDIATED-SIGNALING-PATHWAY           | GO-0019221    | 16   | -0.267389 | -0.772549  | 0.771887  | 1.000000  | 1.000      |
| 433 GOBP-MITOCHONDRION-ORGANIZATION                    | GO-0007005    | 7    | -0.340541 | -0.774785  | 0.769126  | 1.000000  | 1.000      |
| 434 GOBP-NEGATIVE-REGULATION-OF-LOCOMOTION             | GO-0040013    | 5    | -0.388531 | -0.775937  | 0.777937  | 1.000000  | 1.000      |
| 435 GOBP-REGULATION-OF-NEURON-PROJECTION-DEVELOPMENT   | GO-0010975    | 16   | -0.273408 | -0.776840  | 0.781595  | 1.000000  | 1.000      |
| 436 GOBP-REGULATION-OF-HYDROLASE-ACTIVITY              | GO-0051336    | 22   | -0.259044 | -0.779545  | 0.760241  | 1.000000  | 1.000      |
| 437 REACTOME-CA-DEPENDENT-EVENTS                       | R-RNO-111996  | 8    | -0.328887 | -0.7782301 | 0.761714  | 1.000000  | 1.000      |
| 438 GOBP-REGULATION-OF-PROTEIN-LOCALIZATION-TO-CELL... | GO-1904375    | 6    | -0.357154 | -0.783576  | 0.736990  | 1.000000  | 1.000      |
| 439 GOBP-NEGATIVE-REGULATION-OF-CELL-DEATH             | GO-0060548    | 22   | -0.259547 | -0.784844  | 0.774818  | 1.000000  | 1.000      |
| 440 GOBP-G-PROTEIN-COUPLED-RECEPTOR-SIGNALING-PATHWAY  | GO-0007186    | 18   | -0.272829 | -0.787235  | 0.746377  | 1.000000  | 1.000      |
| 441 GOBP-CELL-GROWTH                                   | GO-0016049    | 10   | -0.303582 | -0.788422  | 0.735799  | 1.000000  | 1.000      |
| 442 GOBP-TRANSMEMBRANE-RECEPTOR-PROTEIN-TYROSINE-K...  | GO-0007169    | 19   | -0.268968 | -0.790665  | 0.745476  | 1.000000  | 1.000      |
| 443 GOBP-CELLULAR-RESPONSE-TO-EXTRACELLULAR-STIMULUS   | GO-0031668    | 8    | -0.333081 | -0.791764  | 0.721622  | 1.000000  | 1.000      |
| 444 GOBP-NEGATIVE-REGULATION-OF-ION-TRANSPORT          | GO-0043271    | 11   | -0.306981 | -0.794594  | 0.728232  | 1.000000  | 1.000      |
| 445 GOBP-RESPONSE-TO-EXTRACELLULAR-STIMULUS            | GO-0009991    | 13   | -0.295187 | -0.799165  | 0.750000  | 1.000000  | 1.000      |
| 446 GOBP-CHEMICAL-HOMEOSTASIS                          | GO-0048878    | 23   | -0.259722 | -0.799658  | 0.736780  | 1.000000  | 1.000      |
| 447 GOBP-REGULATION-OF-LONG-TERM-SYNAPTIC-POTENTIAL... | GO-1900271    | 6    | -0.365355 | -0.801993  | 0.727532  | 1.000000  | 1.000      |
| 448 GOBP-PROTEIN-CONTAINING-COMPLEX-SUBUNIT-ORGANIL... | GO-0043933    | 14   | -0.295101 | -0.802851  | 0.742058  | 1.000000  | 1.000      |
| 449 GOBP-REGULATION-OF-MAP-KINASE-ACTIVITY             | GO-0043405    | 9    | -0.321961 | -0.806139  | 0.719321  | 1.000000  | 1.000      |
| 450 GOBP-REGULATION-OF-ANATOMICAL-STRUCTURE-MORPHO...  | GO-0022603    | 17   | -0.285184 | -0.808593  | 0.720960  | 1.000000  | 1.000      |
| 451 GOBP-RESPONSE-TO-METAL-ION                         | GO-0010038    | 15   | -0.290037 | -0.808813  | 0.724816  | 1.000000  | 1.000      |
| 452 GOBP-REGULATION-OF-DEVELOPMENTAL-GROWTH            | GO-0048638    | 9    | -0.321767 | -0.809462  | 0.722444  | 1.000000  | 1.000      |
| 453 REACTOME-DISEASES-OF-SIGNAL-TRANSDUCTION-BY-GR...  | R-HSA-5663202 | 12   | -0.306526 | -0.810784  | 0.738095  | 1.000000  | 1.000      |
| 454 GOBP-RESPONSE-TO-ETHANOL                           | GO-0045471    | 5    | -0.393956 | -0.811577  | 0.737991  | 1.000000  | 1.000      |
| 455 REACTOME-CELL-CYCLE                                | R-RNO-1640170 | 6    | -0.369360 | -0.812255  | 0.723435  | 1.000000  | 1.000      |
| 456 GOBP-SENSORY-PERCEPTION-OF-PAIN                    | GO-0019233    | 5    | -0.397003 | -0.812557  | 0.746627  | 1.000000  | 1.000      |
| 457 GOBP-CELLULAR-CARBOHYDRATE-METABOLIC-PROCESS       | GO-0044262    | 5    | -0.397722 | -0.814037  | 0.734421  | 1.000000  | 1.000      |
| 458 GOBP-PERIPHERAL-NERVOUS-SYSTEM-DEVELOPMENT         | GO-0007422    | 9    | -0.325904 | -0.816645  | 0.704453  | 1.000000  | 1.000      |
| 459 GOBP-PROTEIN-COMPLEX-OLIGOMERIZATION               | GO-0051259    | 6    | -0.377942 | -0.818744  | 0.729844  | 1.000000  | 1.000      |
| 460 GOBP-RESPONSE-TO-ACID-CHEMICAL                     | GO-0001101    | 6    | -0.379902 | -0.820568  | 0.719149  | 1.000000  | 1.000      |
| 461 GOBP-CELLULAR-RESPONSE-TO-INORGANIC-SUBSTANCE      | GO-0071241    | 11   | -0.321863 | -0.820611  | 0.727632  | 1.000000  | 1.000      |
| 462 GOBP-NEURON-APOPTOTIC-PROCESS                      | GO-0051402    | 12   | -0.311935 | -0.828918  | 0.684685  | 1.000000  | 1.000      |
| 463 GOBP-REGULATION-OF-LEUKOCYTE-DIFFERENTIATION       | GO-1902105    | 9    | -0.334481 | -0.830614  | 0.679947  | 1.000000  | 1.000      |
| 464 GOBP-ANIMAL-ORGAN-MORPHOGENESIS                    | GO-0009887    | 12   | -0.314526 | -0.831447  | 0.701665  | 1.000000  | 1.000      |
| 465 GOBP-REGULATION-OF-MUSCLE-SYSTEM-PROCESS           | GO-0090257    | 8    | -0.356456 | -0.837017  | 0.714479  | 1.000000  | 1.000      |
| 466 HALLMARK_UV_RESPONSE_UP                            | M5941         | 5    | -0.403116 | -0.837776  | 0.705968  | 1.000000  | 1.000      |
| 467 GOBP-DICARBOXYLIC-ACID-TRANSPORT                   | GO-0006835    | 5    | -0.410381 | -0.839722  | 0.680973  | 1.000000  | 1.000      |
| 468 GOBP-DENDRITE-DEVELOPMENT                          | GO-0016358    | 9    | -0.337469 | -0.842253  | 0.688568  | 1.000000  | 1.000      |
| 469 GOBP-ACIDIC-AMINO-ACID-TRANSPORT                   | GO-0015800    | 5    | -0.410381 | -0.846052  | 0.677892  | 1.000000  | 1.000      |
| 470 GOBP-NEGATIVE-REGULATION-OF-NERVOUS-SYSTEM-DEV...  | GO-0051961    | 5    | -0.408714 | -0.847596  | 0.693114  | 1.000000  | 1.000      |

Continuation of Table S13

|     | NAME                                              | ID            | SIZE | ES        | NES       | NOM.p.val | FDR.q.val | FWER.p.val |
|-----|---------------------------------------------------|---------------|------|-----------|-----------|-----------|-----------|------------|
| 471 | HALLMARK_KRAS_SIGNALING_UP                        | M5953         | 6    | -0.395184 | -0.852253 | 0.669916  | 1.000000  | 1.000      |
| 472 | GOBP_ADENYLATE_CYCLASE_MODULATING_G_PROTEIN_CO... | GO-0007188    | 11   | -0.328870 | -0.853764 | 0.667110  | 1.000000  | 1.000      |
| 473 | GOBP_REGULATION_OF_INTRACELLULAR_SIGNAL_TRANSD... | GO-1902531    | 21   | -0.285087 | -0.853801 | 0.659498  | 1.000000  | 1.000      |
| 474 | GOBP_ENZYME_LINKED_RECEPTOR_PROTEIN_SIGNALING...  | GO-0007167    | 24   | -0.275870 | -0.859539 | 0.659880  | 1.000000  | 1.000      |
| 475 | GOBP_WOUND_HEALING                                | GO-0042060    | 13   | -0.315768 | -0.861277 | 0.630295  | 1.000000  | 1.000      |
| 476 | GOBP_NEURON_DEATH                                 | GO-0070997    | 18   | -0.297878 | -0.861295 | 0.665874  | 1.000000  | 1.000      |
| 477 | REACTOME_CELL_CYCLE_MITOTIC                       | R-RNO-69278   | 5    | -0.416731 | -0.861429 | 0.672059  | 1.000000  | 1.000      |
| 478 | GOBP_MONOCARBOXYLIC_ACID_TRANSPORT                | GO-0015718    | 5    | -0.410381 | -0.861549 | 0.660287  | 1.000000  | 1.000      |
| 479 | GOBP_POLYSACCHARIDE_METABOLIC_PROCESS             | GO-0005976    | 5    | -0.421869 | -0.862686 | 0.689655  | 1.000000  | 1.000      |
| 480 | GOBP_NEURON_DEVELOPMENT                           | GO-0048666    | 33   | -0.261170 | -0.864704 | 0.661346  | 1.000000  | 1.000      |
| 481 | REACTOME_LEISHMANIA_INFECTION                     | R-HSA-9658195 | 10   | -0.342506 | -0.865841 | 0.643709  | 1.000000  | 1.000      |
| 482 | GOBP_REGULATION_OF_ION_TRANSPORT                  | GO-0043269    | 36   | -0.375941 | -0.869786 | 0.652174  | 1.000000  | 1.000      |
| 483 | GOBP_PROTEIN_LOCALIZATION_TO_PLASMA_MEMBRANE      | GO-0072659    | 7    | -0.375941 | -0.871323 | 0.645658  | 1.000000  | 1.000      |
| 484 | GOBP_PEPTIDYL_AMINO_ACID_MODIFICATION             | GO-0018193    | 22   | -0.289376 | -0.871391 | 0.654126  | 1.000000  | 1.000      |
| 485 | GOBP_CELLULAR_RESPONSE_TO_REACTIVE_OXYGEN_SPECIES | GO-0034614    | 7    | -0.376777 | -0.872004 | 0.650815  | 1.000000  | 1.000      |
| 486 | GOBP_POSITIVE_REGULATION_OF_LONG_TERM_SYNAPTIC... | GO-1900273    | 5    | -0.431655 | -0.873566 | 0.654179  | 1.000000  | 1.000      |
| 487 | GOBP_AXON_DEVELOPMENT                             | GO-0061564    | 18   | -0.291397 | -0.874527 | 0.642363  | 1.000000  | 1.000      |
| 488 | GOBP_CELL_JUNCTION_ASSEMBLY                       | GO-0034329    | 8    | -0.372319 | -0.875121 | 0.642663  | 1.000000  | 1.000      |
| 489 | REACTOME_G_ALPHA_Q_SIGNALING_EVENTS               | R-RNO-416476  | 6    | -0.404208 | -0.877174 | 0.654232  | 1.000000  | 1.000      |
| 490 | GOBP_REGULATION_OF_CATABOLIC_PROCESS              | GO-0009894    | 13   | -0.321200 | -0.878636 | 0.622930  | 1.000000  | 1.000      |
| 491 | GOBP_COAGULATION                                  | GO-0050817    | 8    | -0.370974 | -0.879443 | 0.629921  | 1.000000  | 1.000      |
| 492 | GOBP_IMMUNE_RESPONSE_REGULATING_SIGNALING_PATHWAY | GO-000276     | 8    | -0.372319 | -0.881626 | 0.646492  | 1.000000  | 1.000      |
| 493 | GOBP_CELLULAR_RESPONSE_TO_CHEMICAL_STRESS         | GO-0062197    | 7    | -0.376777 | -0.882384 | 0.635117  | 1.000000  | 1.000      |
| 494 | GOBP_NEGATIVE_REGULATION_OF_PROTEIN_METABOLIC...  | GO-0051248    | 20   | -0.297064 | -0.882813 | 0.649940  | 1.000000  | 1.000      |
| 495 | GOBP_NEGATIVE_REGULATION_OF_NEURON_APOPTOTIC_P... | GO-0043524    | 8    | -0.367909 | -0.884537 | 0.636115  | 1.000000  | 1.000      |
| 496 | GOBP_RESPONSE_TO_OXIDATIVE_STRESS                 | GO-0006979    | 8    | -0.372121 | -0.885925 | 0.620548  | 1.000000  | 1.000      |
| 497 | GOBP_REGULATION_OF_LYMPHOCYTE_ACTIVATION          | GO-0051249    | 5    | -0.431955 | -0.891683 | 0.660322  | 1.000000  | 1.000      |
| 498 | GOBP_FC_RECEPTOR_SIGNALING_PATHWAY                | GO-0038093    | 8    | -0.372394 | -0.892107 | 0.596974  | 1.000000  | 1.000      |
| 499 | GOBP_RESPONSE_TO_REACTIVE_OXYGEN_SPECIES          | GO-0000302    | 8    | -0.372121 | -0.895040 | 0.599469  | 1.000000  | 1.000      |
| 500 | REACTOME_CELLULAR_RESPONSES_TO_EXTERNAL_STIMULI   | R-RNO-8953897 | 12   | -0.344571 | -0.896131 | 0.618090  | 1.000000  | 1.000      |
| 501 | REACTOME_SIGNALING_BY_INTERLEUKINS                | R-RNO-449147  | 15   | -0.315050 | -0.897001 | 0.606516  | 1.000000  | 1.000      |
| 502 | HALLMARK_HYPOXIA                                  | M5891         | 5    | -0.437716 | -0.897564 | 0.624460  | 1.000000  | 1.000      |
| 503 | REACTOME_CYTOKINE_SIGNALING_IN_IMMUNE_SYSTEM      | R-RNO-1280215 | 21   | -0.296233 | -0.898123 | 0.595849  | 1.000000  | 1.000      |
| 504 | GOBP_REGULATION_OF_SYNAPTIC_TRANSMISSION_GLUTA... | GO-0051966    | 12   | -0.338009 | -0.900185 | 0.600249  | 1.000000  | 1.000      |
| 505 | GOBP_CELL_PROJECTION_ORGANIZATION                 | GO-0030030    | 34   | -0.275215 | -0.904872 | 0.610660  | 1.000000  | 1.000      |
| 506 | GOBP_POSITIVE_REGULATION_OF_GROWTH                | GO-0045927    | 9    | -0.369929 | -0.906332 | 0.603518  | 1.000000  | 1.000      |
| 507 | GOBP_POSITIVE_REGULATION_OF_PROTEIN_METABOLIC...  | GO-0051247    | 28   | -0.285922 | -0.909707 | 0.603995  | 1.000000  | 1.000      |
| 508 | GOBP_MEMBRANE_ORGANIZATION                        | GO-0061024    | 12   | -0.324015 | -0.912819 | 0.583867  | 1.000000  | 1.000      |
| 509 | GOBP_MUSCLE_CELL_DIFFERENTIATION                  | GO-0042692    | 10   | -0.359719 | -0.914700 | 0.580563  | 1.000000  | 1.000      |
| 510 | REACTOME_INNATE_IMMUNE_SYSTEM                     | R-RNO-168249  | 16   | -0.340150 | -0.916022 | 0.588235  | 1.000000  | 1.000      |
| 511 | GOBP_CELLULAR_RESPONSE_TO_STARVATION              | GO-0009267    | 5    | -0.445614 | -0.917221 | 0.606607  | 1.000000  | 1.000      |
| 512 | GOBP_POSITIVE_REGULATION_OF_AXONOGENESIS          | GO-0050772    | 5    | -0.442360 | -0.918098 | 0.589080  | 1.000000  | 1.000      |
| 513 | GOBP_FC_EPSILON_RECEPTOR_SIGNALING_PATHWAY        | GO-0038095    | 7    | -0.404406 | -0.919451 | 0.610335  | 1.000000  | 1.000      |

Continuation of Table S13

| NAME | ID                                                 | SIZE | ES        | NES       | NOM.p.val | FDR.q.val | FWER.p.val |
|------|----------------------------------------------------|------|-----------|-----------|-----------|-----------|------------|
| 514  | GOBP-RESPONSE_TO_STARVATION                        | 5    | -0.445614 | -0.920998 | 0.588674  | 1.000000  | 1.000      |
| 515  | GOBP-POSITIVE-REGULATION_OF_CATALYTIC_ACTIVITY     | 30   | -0.288219 | -0.921532 | 0.581158  | 1.000000  | 1.000      |
| 516  | GOBP-REGULATION_OF_CELLULAR_LOCALIZATION           | 17   | -0.319435 | -0.922197 | 0.585784  | 1.000000  | 1.000      |
| 517  | REACTOME_FC_EPSILON_RECEPTOR_FCHRL_SIGNALING       | 7    | -0.404406 | -0.923777 | 0.576056  | 1.000000  | 1.000      |
| 518  | GOBP-BIOLOGICAL-PROCESS_INVOLVED_IN_SYMBIOTIC....  | 11   | -0.358994 | -0.928067 | 0.572005  | 1.000000  | 1.000      |
| 519  | GOBP-DEVELOPMENTAL_CELL_GROWTH                     | 5    | -0.449049 | -0.930773 | 0.568513  | 1.000000  | 1.000      |
| 520  | GOBP-REGULATION_OF_CELL_DIFFERENTIATION            | 36   | -0.287615 | -0.932209 | 0.588432  | 1.000000  | 1.000      |
| 521  | GOBP-REGULATION_OF_CYSSTEINE_TYPE_ENDOPEPTIDASE... | 9    | -0.376841 | -0.932613 | 0.548139  | 1.000000  | 1.000      |
| 522  | GOBP-POSITIVE-REGULATION_OF_DEVELOPMENTAL_GROWTH   | 8    | -0.394318 | -0.932422 | 0.572414  | 1.000000  | 1.000      |
| 523  | GOBP-REGULATION_OF_ENDOCYTOSIS                     | 6    | -0.431767 | -0.941092 | 0.541787  | 1.000000  | 1.000      |
| 524  | REACTOME_GPCR_LIGAND_BINDING                       | 8    | -0.398844 | -0.943625 | 0.549724  | 1.000000  | 1.000      |
| 525  | GOBP-REGULATION_OF_RECEPTOR_MEDIATED_ENDOCYTOSIS   | 5    | -0.457062 | -0.943758 | 0.562942  | 1.000000  | 1.000      |
| 526  | GOBP-NERVE_DEVELOPMENT                             | 9    | -0.383326 | -0.944485 | 0.549587  | 1.000000  | 1.000      |
| 527  | GOBP-ENDOMEMBRANE_SYSTEM_ORGANIZATION              | 6    | -0.433298 | -0.945618 | 0.565460  | 1.000000  | 1.000      |
| 528  | GOBP-REGULATION_OF_CELL_DEVELOPMENT                | 15   | -0.332473 | -0.947404 | 0.543532  | 1.000000  | 1.000      |
| 529  | GOBP-MACROMOLECULE_CATABOLIC_PROCESS               | 12   | -0.359068 | -0.949170 | 0.539052  | 1.000000  | 1.000      |
| 530  | GOBP-POSITIVE-REGULATION_OF_CELL_GROWTH            | 6    | -0.443117 | -0.954214 | 0.532578  | 1.000000  | 1.000      |
| 531  | GOBP-REGULATION_OF_CIRCADIAN_RHYTHM                | 7    | -0.422127 | -0.954991 | 0.546593  | 1.000000  | 1.000      |
| 532  | GOBP-GLIAL-CELL_DIFFERENTIATION                    | 10   | -0.379435 | -0.955364 | 0.541724  | 1.000000  | 1.000      |
| 533  | GOBP-BIOLOGICAL_ADHESION                           | 19   | -0.322720 | -0.956929 | 0.519573  | 1.000000  | 1.000      |
| 534  | GOBP-POSITIVE-REGULATION_OF_PROTEOLYSIS            | 8    | -0.400377 | -0.960244 | 0.512855  | 1.000000  | 1.000      |
| 535  | GOBP-RESPONSE_TO_WOUNDING                          | 15   | -0.347811 | -0.963425 | 0.517767  | 1.000000  | 1.000      |
| 536  | GOBP-CELLULAR_MACROMOLECULE_LOCALIZATION           | 21   | -0.318958 | -0.963815 | 0.523077  | 1.000000  | 1.000      |
| 537  | GOBP-REGULATION_OF_BINDING                         | 11   | -0.375072 | -0.970026 | 0.501323  | 1.000000  | 1.000      |
| 538  | GOBP-NEURON_PROJECTION_GUIDANCE                    | 9    | -0.394243 | -0.970742 | 0.529491  | 1.000000  | 1.000      |
| 539  | GOBP-REGULATION_OF_SYNAPSE_STRUCTURE_OR_ACTIVITY   | 11   | -0.375352 | -0.972750 | 0.504551  | 1.000000  | 1.000      |
| 540  | GOBP-NEGATIVE-REGULATION_OF_INTRACELLULAR_SIGN...  | 7    | -0.422518 | -0.974353 | 0.504132  | 1.000000  | 1.000      |
| 541  | GOBP-REGULATION_OF_MAPK_CASCADE                    | 13   | -0.360615 | -0.975328 | 0.492366  | 1.000000  | 1.000      |
| 542  | GOBP-REGULATION_OF_NERVOUS_SYSTEM_DEVELOPMENT      | 15   | -0.347593 | -0.976842 | 0.508642  | 1.000000  | 1.000      |
| 543  | GOBP-INNATE_IMMUNE_RESPONSE                        | 7    | -0.430172 | -0.977855 | 0.509642  | 1.000000  | 1.000      |
| 544  | GOBP-NEURON_DIFFERENTIATION                        | 36   | -0.296160 | -0.978842 | 0.516968  | 1.000000  | 1.000      |
| 545  | GOBP-POSITIVE-REGULATION_OF_MAPK_CASCADE           | 9    | -0.400377 | -0.980287 | 0.503285  | 1.000000  | 1.000      |
| 546  | GOBP-GENERATION_OF_PRECURSOR_METABOLITES_AND_E...  | 5    | -0.478377 | -0.984062 | 0.509299  | 1.000000  | 1.000      |
| 547  | GOBP-REGULATION_OF_CELL_PROJECTION_ORGANIZATION    | 20   | -0.335810 | -0.989216 | 0.497549  | 1.000000  | 1.000      |
| 548  | GOBP-MULTICELLULAR_ORGANISMAL_RESPONSE_TO_STRESS   | 5    | -0.484750 | -0.992234 | 0.469208  | 1.000000  | 1.000      |
| 549  | GOBP-TAXIS                                         | 14   | -0.359202 | -0.995285 | 0.477387  | 1.000000  | 1.000      |
| 550  | GOBP-LIPID_EXPORT_FROM_CELL                        | 5    | -0.488924 | -1.002163 | 0.482014  | 1.000000  | 1.000      |
| 551  | GOBP-CELLULAR_COMPONENT_MORPHOGENESIS              | 24   | -0.321972 | -1.003070 | 0.464576  | 1.000000  | 1.000      |
| 552  | GOBP-CELL_PART_MORPHOGENESIS                       | 24   | -0.321972 | -1.005885 | 0.468160  | 1.000000  | 1.000      |
| 553  | GOBP-MUSCLE_SYSTEM_PROCESS                         | 9    | -0.395253 | -1.007126 | 0.457143  | 1.000000  | 1.000      |
| 554  | REACTOME_CIRCADIAN_CLOCK                           | 5    | -0.492923 | -1.007630 | 0.476401  | 1.000000  | 1.000      |
| 555  | GOBP-POSITIVE-REGULATION_OF_CYSSTEINE_TYPE_ENDO... | 7    | -0.439456 | -1.009106 | 0.492517  | 1.000000  | 1.000      |
| 556  | GOBP-CELL_MORPHOGENESIS                            | 24   | -0.321972 | -1.010261 | 0.465476  | 1.000000  | 1.000      |

Continuation of Table S13

|     | NAME                                              | ID            | SIZE | ES        | NES       | NOM.p.val | FDR.q.val | FWER.p.val |
|-----|---------------------------------------------------|---------------|------|-----------|-----------|-----------|-----------|------------|
| 557 | GOBP-EMBRYONIC-MORPHOGENESIS                      | GO-0048598    | 6    | -0.455930 | -1.010781 | 0.452211  | 1.000000  | 1.000      |
| 558 | HALLMARK-APOPTOSIS                                | M5902         | 6    | -0.467373 | -1.011378 | 0.464849  | 1.000000  | 1.000      |
| 559 | GOBP-REGULATION-OF-TRANSPORT                      | GO-0051049    | 44   | -0.308809 | -1.016790 | 0.448889  | 1.000000  | 1.000      |
| 560 | GOBP-REGULATION-OF-POSTSYNAPSE-ORGANIZATION       | GO-0099175    | 6    | -0.460119 | -1.017007 | 0.456311  | 1.000000  | 1.000      |
| 561 | GOBP-SMALL-GTPASE-MEDIATED-SIGNAL-TRANSDUCTION    | GO-0007264    | 8    | -0.436041 | -1.018066 | 0.469880  | 1.000000  | 1.000      |
| 562 | GOBP-REGULATION-OF-NEUROGENESIS                   | GO-0050767    | 14   | -0.373634 | -1.020277 | 0.443742  | 1.000000  | 1.000      |
| 563 | GOBP-DENDRITIC-SPINE-MORPHOGENESIS                | GO-0060997    | 5    | -0.497036 | -1.021181 | 0.453102  | 1.000000  | 1.000      |
| 564 | GOBP-CELL-MORPHOGENESIS-INVOLVED-IN-DIFFERENTI... | GO-0000904    | 21   | -0.346012 | -1.024785 | 0.452607  | 1.000000  | 1.000      |
| 565 | REACTOME-TRAFFICKING-OF-GLUR2-CONTAINING-AMPA...  | R-RNO-416993  | 8    | -0.429855 | -1.025037 | 0.470509  | 1.000000  | 1.000      |
| 566 | GOBP-COGNITION                                    | GO-0050890    | 28   | -0.322019 | -1.025425 | 0.438279  | 1.000000  | 1.000      |
| 567 | GOBP-POSITIVE-REGULATION-OF-PEPTIDASE-ACTIVITY    | GO-0010952    | 7    | -0.439456 | -1.025468 | 0.449376  | 1.000000  | 1.000      |
| 568 | GOBP-CELL-MORPHOGENESIS-INVOLVED-IN-NEURON-DIF... | GO-0048667    | 21   | -0.346012 | -1.025485 | 0.438107  | 1.000000  | 1.000      |
| 569 | GOBP-DENDRITIC-SPINE-DEVELOPMENT                  | GO-0060996    | 6    | -0.469296 | -1.028298 | 0.422438  | 1.000000  | 1.000      |
| 570 | GOBP-DENDRITE-MORPHOGENESIS                       | GO-0048813    | 6    | -0.470610 | -1.029367 | 0.443526  | 1.000000  | 1.000      |
| 571 | GOBP-CELLULAR-HOMEOSTASIS                         | GO-0019725    | 18   | -0.357835 | -1.029437 | 0.438788  | 1.000000  | 1.000      |
| 572 | GOBP-NEUROGENESIS                                 | GO-0022008    | 40   | -0.313680 | -1.036672 | 0.415919  | 1.000000  | 1.000      |
| 573 | GOBP-REGULATION-OF-PROTEOLYSIS                    | GO-0030162    | 12   | -0.391617 | -1.037270 | 0.443456  | 1.000000  | 1.000      |
| 574 | GOBP-REGULATION-OF-PROTEIN-LOCALIZATION-TO-MEM... | GO-1905475    | 7    | -0.446443 | -1.039867 | 0.428571  | 1.000000  | 1.000      |
| 575 | GOBP-POSITIVE-REGULATION-OF-PEPTIDYL-TYROSINE...  | GO-0050731    | 8    | -0.439800 | -1.041256 | 0.409029  | 1.000000  | 1.000      |
| 576 | GOBP-MEMBRANE-PROTEIN-PROTEOLYSIS                 | GO-0033619    | 6    | -0.472809 | -1.041374 | 0.425626  | 1.000000  | 1.000      |
| 577 | GOBP-PROTEOLYSIS                                  | GO-0006508    | 17   | -0.357102 | -1.046264 | 0.415648  | 1.000000  | 1.000      |
| 578 | GOBP-REGULATION-OF-TRANSMEMBRANE-TRANSPORT        | GO-0034762    | 23   | -0.340909 | -1.051141 | 0.413998  | 1.000000  | 1.000      |
| 579 | GOBP-BEHAVIOR                                     | GO-0007610    | 32   | -0.328696 | -1.053493 | 0.420118  | 1.000000  | 1.000      |
| 580 | GOBP-POSITIVE-REGULATION-OF-NERVOUS-SYSTEM-DEV... | GO-0051962    | 12   | -0.406712 | -1.056167 | 0.404732  | 1.000000  | 1.000      |
| 581 | GOBP-G-PROTEIN-COUPLED-GLUTAMATE-RECEPTOR-SIGN... | GO-0007216    | 8    | -0.454723 | -1.060345 | 0.395561  | 1.000000  | 1.000      |
| 582 | REACTOME-ONCOGENIC-MAPK-SIGNALING                 | R-HSA-6802967 | 5    | -0.515237 | -1.063095 | 0.400281  | 1.000000  | 1.000      |
| 583 | GOBP-STRIATED-MUSCLE-CELL-DIFFERENTIATION         | GO-0051146    | 9    | -0.439544 | -1.063622 | 0.378729  | 1.000000  | 1.000      |
| 584 | GOBP-ENDOCRINE-SYSTEM-DEVELOPMENT                 | GO-0035270    | 6    | -0.483186 | -1.064178 | 0.406685  | 1.000000  | 1.000      |
| 585 | GOBP-REGULATION-OF-NEURONAL-SYNAPTIC-PLASTICITY   | GO-0048168    | 7    | -0.477437 | -1.072065 | 0.391365  | 1.000000  | 1.000      |
| 586 | GOBP-NUCLEAR-TRANSPORT                            | GO-0051169    | 5    | -0.512201 | -1.073673 | 0.387697  | 1.000000  | 1.000      |
| 587 | GOBP-POSITIVE-REGULATION-OF-NEUROGENESIS          | GO-0050769    | 12   | -0.406712 | -1.074596 | 0.375979  | 1.000000  | 1.000      |
| 588 | GOBP-CELLULAR-COMPONENT-MAINTENANCE               | GO-0043954    | 5    | -0.522502 | -1.080046 | 0.374456  | 1.000000  | 1.000      |
| 589 | GOBP-POSITIVE-REGULATION-OF-CELL-DEVELOPMENT      | GO-0010720    | 12   | -0.406712 | -1.080283 | 0.371681  | 1.000000  | 1.000      |
| 590 | GOBP-NEGATIVE-REGULATION-OF-CELLULAR-COMPONENT... | GO-0051129    | 11   | -0.411096 | -1.082345 | 0.374194  | 1.000000  | 1.000      |
| 591 | GOBP-POSITIVE-REGULATION-OF-CELLULAR-COMPONENT... | GO-0044089    | 9    | -0.436868 | -1.083633 | 0.386179  | 1.000000  | 1.000      |
| 592 | REACTOME-MAPK-TARGETS-NUCLEAR-EVENTS-MEDIATED...  | R-HSA-450282  | 5    | -0.530120 | -1.084974 | 0.364943  | 1.000000  | 1.000      |
| 593 | GOBP-AGING                                        | GO-0007568    | 13   | -0.403173 | -1.087372 | 0.368758  | 1.000000  | 1.000      |
| 594 | GOBP-POSITIVE-REGULATION-OF-INTRACELLULAR-SIGN... | GO-1902533    | 14   | -0.395490 | -1.095511 | 0.340452  | 1.000000  | 1.000      |
| 595 | GOBP-REGULATION-OF-PEPTIDASE-ACTIVITY             | GO-0052547    | 10   | -0.441739 | -1.101688 | 0.356307  | 1.000000  | 1.000      |
| 596 | GOBP-SENSORY-PERCEPTION                           | GO-0007600    | 9    | -0.452981 | -1.111169 | 0.349933  | 1.000000  | 1.000      |
| 597 | GOBP-ION-HOMEOSTASIS                              | GO-0050801    | 16   | -0.390991 | -1.112541 | 0.341404  | 1.000000  | 1.000      |
| 598 | GOBP-SYNAPTIC-TRANSMISSION-GLUTAMATERGIC          | GO-0035249    | 13   | -0.410925 | -1.112704 | 0.341837  | 1.000000  | 1.000      |
| 599 | GOBP-REGULATION-OF-PEPTIDYL-TYROSINE-PHOSPHORY... | GO-0050730    | 9    | -0.462756 | -1.122932 | 0.316778  | 1.000000  | 1.000      |

Continuation of Table S13

| NAME | ID                                                 | SIZE          | ES | NES       | NOM.p.val | FDR.q.val | FWER.p.val |
|------|----------------------------------------------------|---------------|----|-----------|-----------|-----------|------------|
| 600  | REACTOME_POST_TRANSLATIONAL_PROTEIN_MODIFICATION   | R-RNO-597592  | 7  | -0.496854 | -1.123051 | 0.334752  | 1.000000   |
| 601  | GOBP_ADENYLATE_CYCLASE_INHIBITING_G_PROTEIN_CO...  | GO-0007193    | 9  | -0.453729 | -1.126028 | 0.335142  | 1.000000   |
| 602  | GOBP_REGULATION_OF_SIGNALING_RECEPTOR_ACTIVITY     | GO-0010469    | 14 | -0.416229 | -1.126545 | 0.320203  | 1.000000   |
| 603  | GOBP_CENTRAL_NERVOUS_SYSTEM_DEVELOPMENT            | GO-0007417    | 26 | -0.361100 | -1.127087 | 0.304551  | 1.000000   |
| 604  | GOBP_POSITIVE_REGULATION_OF_GLIOGENESIS            | GO-0014015    | 5  | -0.552516 | -1.127870 | 0.306428  | 1.000000   |
| 605  | GOBP_REGULATION_OF_METAL_ION_TRANSPORT             | GO-0010959    | 6  | -0.511182 | -1.129126 | 0.315049  | 1.000000   |
| 606  | GOBP_SECOND_MESSENGER_MEDIATED_SIGNALING           | GO-0007196    | 16 | -0.401719 | -1.132291 | 0.327500  | 1.000000   |
| 607  | REACTOME_NERVOUS_SYSTEM_DEVELOPMENT                | R-RNO-9675108 | 15 | -0.401931 | -1.138058 | 0.299007  | 1.000000   |
| 608  | GOBP_POSITIVE_REGULATION_OF_BINDING                | GO-0051099    | 6  | -0.515832 | -1.138606 | 0.314706  | 1.000000   |
| 609  | REACTOME_CELLULAR_SENESCENCE                       | R-RNO-2559583 | 6  | -0.524390 | -1.139635 | 0.333809  | 1.000000   |
| 610  | GOBP_REGULATION_OF_GLIOGENESIS                     | GO-0014013    | 5  | -0.552516 | -1.144229 | 0.285075  | 1.000000   |
| 611  | REACTOME_SENESCENCE_ASSOCIATED_SECRETORY_PHENO...  | R-RNO-2559582 | 6  | -0.524390 | -1.146157 | 0.281831  | 1.000000   |
| 612  | GOBP_NEGATIVE_REGULATION_OF_CATABOLIC_PROCESS      | GO-0009895    | 8  | -0.481073 | -1.149288 | 0.306383  | 1.000000   |
| 613  | REACTOME_TRAFFICKING_OF_AMPA_RECEPTORS             | R-RNO-399719  | 11 | -0.451166 | -1.149474 | 0.295699  | 1.000000   |
| 614  | REACTOME_INTERLEUKIN_17_SIGNALING                  | R-RNO-448424  | 6  | -0.524390 | -1.152525 | 0.290323  | 1.000000   |
| 615  | GOBP_GLIOGENESIS                                   | GO-0042063    | 12 | -0.446941 | -1.160225 | 0.269821  | 1.000000   |
| 616  | GOBP_REGULATION_OF_CELLULAR_COMPONENT_BIOGENESIS   | GO-0044087    | 10 | -0.459190 | -1.161174 | 0.296296  | 1.000000   |
| 617  | GOBP_DEVELOPMENTAL_MATURATION                      | GO-0021700    | 5  | -0.578313 | -1.170570 | 0.284875  | 1.000000   |
| 618  | GOBP_RAS_PROTEIN_SIGNAL_TRANSDUCTION               | GO-0007265    | 5  | -0.568525 | -1.174403 | 0.265625  | 1.000000   |
| 619  | GOBP_FOREBRAIN_DEVELOPMENT                         | GO-0030900    | 9  | -0.478198 | -1.175461 | 0.277778  | 1.000000   |
| 620  | GOBP_REGULATION_OF_SYSTEM_PROCESS                  | GO-0044057    | 18 | -0.414025 | -1.176605 | 0.273515  | 1.000000   |
| 621  | REACTOME_CLASS_C_3_METABOTROPIC_GLUTAMATE_PHER...  | R-RNO-420499  | 7  | -0.527205 | -1.181464 | 0.258250  | 1.000000   |
| 622  | GOBP_ORGANONITROGEN_COMPOUND_CATABOLIC_PROCESS     | GO-1901565    | 9  | -0.484991 | -1.188145 | 0.265823  | 1.000000   |
| 623  | GOBP_REGULATION_OF_PROTEIN_TYROSINE_KINASE_ACT...  | GO-0061097    | 5  | -0.578313 | -1.191033 | 0.244666  | 1.000000   |
| 624  | REACTOME_MYD88_INDEPENDENT_TLR4_CASCADE            | R-RNO-166166  | 8  | -0.500000 | -1.193399 | 0.251001  | 1.000000   |
| 625  | GOBP_POSITIVE_REGULATION_OF_PROTEIN_TYROSINE_K...  | GO-0061098    | 5  | -0.578313 | -1.193493 | 0.228814  | 1.000000   |
| 626  | GOBP_PROTEIN_LOCALIZATION_TO_CELL_PERIPHERY        | GO-1990778    | 12 | -0.454596 | -1.197825 | 0.246173  | 1.000000   |
| 627  | REACTOME_DEVELOPMENTAL_BIOLOGY                     | R-RNO-1266738 | 23 | -0.392781 | -1.199451 | 0.243013  | 1.000000   |
| 628  | REACTOME_TOLL_LIKE_RECEPTOR_9_TLR9_CASCADE         | R-RNO-168138  | 8  | -0.500000 | -1.199451 | 0.242991  | 1.000000   |
| 629  | GOBP_METAL_ION_HOMEOSTASIS                         | GO-0055065    | 14 | -0.438007 | -1.200006 | 0.241730  | 1.000000   |
| 630  | GOBP_CELLULAR_ION_HOMEOSTASIS                      | GO-0006873    | 14 | -0.430252 | -1.200130 | 0.234414  | 1.000000   |
| 631  | REACTOME_TOLL_LIKE_RECEPTOR_CASCADES               | R-RNO-168898  | 8  | -0.500000 | -1.201143 | 0.261224  | 1.000000   |
| 632  | GOBP_POSITIVE_REGULATION_OF_CELL_DIFFERENTIATION   | GO-0045597    | 27 | -0.383984 | -1.201938 | 0.238754  | 1.000000   |
| 633  | GOBP_TELENCEPHALON_DEVELOPMENT                     | GO-0021537    | 6  | -0.547686 | -1.202760 | 0.232295  | 1.000000   |
| 634  | REACTOME_TOLL_LIKE_RECEPTOR_TLR1_TLR2_CASCADE      | R-RNO-168179  | 8  | -0.500000 | -1.206976 | 0.209809  | 1.000000   |
| 635  | GOBP_DIVALENT_INORGANIC_CATION_HOMEOSTASIS         | GO-0072507    | 13 | -0.454779 | -1.210221 | 0.230089  | 1.000000   |
| 636  | GOBP_REGULATION_OF_NERVOUS_SYSTEM_PROCESS          | GO-0031644    | 8  | -0.525000 | -1.217776 | 0.216714  | 1.000000   |
| 637  | GOBP_REGULATION_OF_CYTOSOLIC_CALCIIUM_ION_CONCE... | GO-0051480    | 13 | -0.454779 | -1.218932 | 0.224439  | 1.000000   |
| 638  | GOBP_MYOTUBE_DIFFERENTIATION                       | GO-0014902    | 5  | -0.600574 | -1.220344 | 0.191176  | 1.000000   |
| 639  | GOBP_ASSOCIATIVE_LEARNING                          | GO-0006306    | 7  | -0.534403 | -1.222552 | 0.209538  | 1.000000   |
| 640  | GOBP_RESPONSE_TO_ABiotic_STIMULUS                  | GO-0009628    | 27 | -0.390779 | -1.223687 | 0.220554  | 1.000000   |
| 641  | GOBP_RESPONSE_TO_UV                                | GO-0009411    | 5  | -0.593740 | -1.232479 | 0.194074  | 1.000000   |
| 642  | GOBP_POSITIVE_REGULATION_OF_SIGNALING              | GO-0023056    | 34 | -0.381787 | -1.237294 | 0.201835  | 1.000000   |

Continuation of Table S13

|     | NAME                                              | ID            | SIZE | ES        | NES       | NOM.p.val | FDR.q.val | FWER.p.val |
|-----|---------------------------------------------------|---------------|------|-----------|-----------|-----------|-----------|------------|
| 643 | GOBP-POSITIVE-REGULATION_OF_SYNAPTIC-TRANSMISSION | GO-0050806    | 15   | -0.446310 | -1.243693 | 0.197270  | 1.000000  | 1.000      |
| 644 | GOBP-REGULATION_OF_NEUROTRANSMITTER-RECEPTOR-A... | GO-0099601    | 13   | -0.464089 | -1.244266 | 0.198980  | 1.000000  | 1.000      |
| 645 | GOBP-NERVOUS-SYSTEM-PROCESS                       | GO-0050877    | 38   | -0.383299 | -1.246184 | 0.170843  | 1.000000  | 1.000      |
| 646 | GOBP-REGULATION_OF_CELL-SIZE                      | GO-0008361    | 5    | -0.616342 | -1.249027 | 0.193303  | 1.000000  | 1.000      |
| 647 | GOBP-RESPONSE-TO-DRUG                             | GO-0042493    | 11   | -0.483898 | -1.254085 | 0.183448  | 1.000000  | 1.000      |
| 648 | GOBP-PEPTIDYL-TYROSINE-MODIFICATION               | GO-0018212    | 10   | -0.491220 | -1.260758 | 0.195187  | 1.000000  | 1.000      |
| 649 | GOBP-CATION-TRANSPORT                             | GO-0006812    | 25   | -0.405444 | -1.262656 | 0.174323  | 1.000000  | 1.000      |
| 650 | GOBP-POSITIVE-REGULATION_OF_DEVELOPMENTAL-PROCESS | GO-0051094    | 32   | -0.390252 | -1.269152 | 0.186421  | 1.000000  | 1.000      |
| 651 | REACTOME-EPHLEPHRIN-SIGNALING                     | R-RNO-2682334 | 6    | -0.594419 | -1.278423 | 0.161572  | 1.000000  | 1.000      |
| 652 | GOBP-REGULATION_OF_TRANS-SYNAPTIC-SIGNALING       | GO-0099177    | 40   | -0.391732 | -1.280379 | 0.162556  | 1.000000  | 1.000      |
| 653 | GOBP-PROTEIN-LOCALIZATION_TO-CELL-JUNCTION        | GO-1902414    | 6    | -0.592862 | -1.283175 | 0.165242  | 1.000000  | 1.000      |
| 654 | GOBP-REGULATION_OF_CATION-TRANSMEMBRANE-TRANSPORT | GO-1904062    | 16   | -0.445148 | -1.284100 | 0.167920  | 1.000000  | 1.000      |
| 655 | GOBP-EPHRLIN-RECEPTOR-SIGNALING-PATHWAY           | GO-0048013    | 5    | -0.625294 | -1.284540 | 0.142433  | 1.000000  | 1.000      |
| 656 | GOBP-RESPONSE-TO-MECHANICAL-STIMULUS              | GO-0009612    | 6    | -0.598820 | -1.286244 | 0.154728  | 1.000000  | 1.000      |
| 657 | GOBP-CALCIUM-MEDIATED-SIGNALING                   | GO-0019722    | 10   | -0.513248 | -1.289832 | 0.170077  | 1.000000  | 1.000      |
| 658 | GOBP-REGULATION_OF_AXONOGENESIS                   | GO-0050770    | 7    | -0.551931 | -1.291324 | 0.155705  | 1.000000  | 1.000      |
| 659 | GOBP-CELL-SURFACE-RECEPTOR-SIGNALING-PATHWAY_I... | GO-1905114    | 15   | -0.461716 | -1.291678 | 0.141800  | 1.000000  | 1.000      |
| 660 | GOBP-REGULATION_OF_MEMBRANE-POTENTIAL             | GO-0042391    | 17   | -0.452883 | -1.296827 | 0.168130  | 1.000000  | 1.000      |
| 661 | GOBP-SYNAPSE-ORGANIZATION                         | GO-0050808    | 17   | -0.453899 | -1.298745 | 0.161491  | 1.000000  | 1.000      |
| 662 | GOBP-REGULATION_OF_ANATOMICAL-STRUCTURE-SIZE      | GO-0090066    | 10   | -0.509417 | -1.301084 | 0.156836  | 1.000000  | 1.000      |
| 663 | GOBP-PROTEIN-LOCALIZATION_TO-MEMBRANE             | GO-0072657    | 14   | -0.478424 | -1.314003 | 0.129111  | 1.000000  | 1.000      |
| 664 | GOBP-PROTEIN-CATABOLIC-PROCESS                    | GO-0030163    | 8    | -0.554964 | -1.324773 | 0.151070  | 1.000000  | 1.000      |
| 665 | GOBP-MAPK-CASCADE                                 | GO-0000165    | 18   | -0.449601 | -1.325786 | 0.135135  | 1.000000  | 1.000      |
| 666 | GOBP-NEURON-PROJECTION-ORGANIZATION               | GO-0106027    | 8    | -0.558306 | -1.327725 | 0.139785  | 1.000000  | 1.000      |
| 667 | GOBP-CELL-JUNCTION-ORGANIZATION                   | GO-0034330    | 19   | -0.444941 | -1.330638 | 0.133333  | 1.000000  | 1.000      |
| 668 | GOBP-ADENYLATE-CYCLASE-INHIBITING-G-PROTEIN_CO... | GO-0007193    | 5    | -0.646547 | -1.334125 | 0.113128  | 1.000000  | 1.000      |
| 669 | GOBP-PROTEIN-LOCALIZATION_TO-POSTSYNAPSE          | GO-0062237    | 5    | -0.644871 | -1.338003 | 0.110951  | 1.000000  | 1.000      |
| 670 | GOBP-TRANSMEMBRANE-TRANSPORT                      | GO-0055085    | 27   | -0.423912 | -1.346033 | 0.116359  | 1.000000  | 1.000      |
| 671 | GOBP-PROTEIN-LOCALIZATION_TO-SYNAPSE              | GO-0035418    | 5    | -0.644871 | -1.347787 | 0.104634  | 1.000000  | 1.000      |
| 672 | GOBP-REGULATION_OF_CELLULAR-COMPONENT-SIZE        | GO-0032535    | 7    | -0.591471 | -1.351600 | 0.114168  | 1.000000  | 1.000      |
| 673 | GOBP-RESPONSE-TO-RADIATION                        | GO-0009314    | 13   | -0.497857 | -1.353789 | 0.116751  | 1.000000  | 1.000      |
| 674 | HALLMARK-EPITHELIAL-MESENCHYMAL-TRANSITION        | M5930         | 5    | -0.644960 | -1.357589 | 0.098240  | 1.000000  | 1.000      |
| 675 | GOBP-REGULATION_OF_SYNAPTIC-PLASTICITY            | GO-0048167    | 21   | -0.457507 | -1.362874 | 0.110843  | 1.000000  | 1.000      |
| 676 | GOBP-HEAD-DEVELOPMENT                             | GO-0060322    | 22   | -0.452719 | -1.367406 | 0.091667  | 1.000000  | 1.000      |
| 677 | GOBP-REGULATION_OF_CATION-CHANNEL-ACTIVITY        | GO-2001257    | 14   | -0.500998 | -1.371778 | 0.115854  | 1.000000  | 1.000      |
| 678 | REACTOME-L1CAM-INTERACTIONS                       | R-RNO-373760  | 5    | -0.621936 | -1.394307 | 0.071736  | 0.940606  | 1.000      |
| 679 | GOBP-REGULATION_OF_PROTEIN-CATABOLIC-PROCESS      | GO-0042176    | 7    | -0.621936 | -1.407330 | 0.067511  | 0.886952  | 1.000      |
| 680 | REACTOME-RNA-POLYMERASE-II-TRANSCRIPTION          | R-RNO-73857   | 20   | -0.473125 | -1.408702 | 0.083933  | 0.902358  | 1.000      |
| 681 | GOBP-CELL-CELL-SIGNALING                          | GO-0007267    | 56   | -0.425812 | -1.412175 | 0.081839  | 0.904939  | 1.000      |
| 682 | REACTOME-EXTRACELLULAR-MATRIX-ORGANIZATION        | R-RNO-1474244 | 5    | -0.690200 | -1.419354 | 0.070100  | 0.887782  | 1.000      |
| 683 | GOBP-REGULATION_OF-TRANSPORTER-ACTIVITY           | GO-0032409    | 17   | -0.497362 | -1.421711 | 0.073983  | 0.898037  | 1.000      |
| 684 | GOBP-RESPONSE-TO-LIGHT-STIMULUS                   | GO-0009416    | 11   | -0.541968 | -1.425348 | 0.083979  | 0.902774  | 1.000      |
| 685 | GOBP-NEGATIVE-REGULATION_OF_CELL-PROJECTION_OR... | GO-0031345    | 5    | -0.691376 | -1.430457 | 0.057863  | 0.897435  | 1.000      |

Continuation of Table S13

| NAME | ID                                                | SIZE | ES        | NES       | NOM.p.val | FDR.q.val | FWER.p.val |
|------|---------------------------------------------------|------|-----------|-----------|-----------|-----------|------------|
| 686  | GOBP-REGULATION-OF-POSTSYNAPTIC-MEMBRANE-POTEN... | 14   | -0.530373 | -1.442613 | 0.058752  | 0.849494  | 1.000      |
| 687  | GOBP-LONG-TERM-SYNAPTIC-POTENTIATION              | 12   | -0.543404 | -1.448000 | 0.067639  | 0.846073  | 1.000      |
| 688  | GOBP-CATION-TRANSMEMBRANE-TRANSPORT               | 18   | -0.511180 | -1.448633 | 0.063246  | 0.869335  | 1.000      |
| 689  | GOBP-POSTSYNAPSE-ORGANIZATION                     | 10   | -0.585837 | -1.474440 | 0.049096  | 0.747872  | 1.000      |
| 690  | GOBP-REGULATION-OF-NMDA-RECEPTOR-ACTIVITY         | 10   | -0.584558 | -1.492679 | 0.040682  | 0.679055  | 1.000      |
| 691  | REACTOME-PROTEIN-PROTEIN-INTERACTIONS-AT-SYNAPSES | 12   | -0.563934 | -1.502185 | 0.038911  | 0.655744  | 1.000      |
| 692  | GOBP-CHEMICAL-SYNAPTIC-TRANSMISSION-POSTSYNAPTIC  | 9    | -0.627280 | -1.508233 | 0.034993  | 0.647702  | 1.000      |
| 693  | GOBP-SYNAPTIC-SIGNALING                           | 47   | -0.464335 | -1.525744 | 0.041989  | 0.586923  | 1.000      |
| 694  | REACTOME-SYNAPTIC-ADHESION-LIKE-MOLECULES         | 9    | -0.628279 | -1.530006 | 0.038564  | 0.589731  | 1.000      |
| 695  | GOBP-CALCIUM-ION-TRANSPORT                        | 11   | -0.602221 | -1.551766 | 0.019815  | 0.516079  | 1.000      |
| 696  | GOBP-IONOTROPIC-GLUTAMATE-RECEPTOR-SIGNALING-P... | 9    | -0.632724 | -1.552929 | 0.021769  | 0.534304  | 1.000      |
| 697  | GOBP-CALCIUM-ION-TRANSMEMBRANE-TRANSPORT          | 7    | -0.694495 | -1.568769 | 0.022191  | 0.487994  | 1.000      |
| 698  | GOBP-EXCITATORY-CHEMICAL-SYNAPTIC-TRANSMISSION    | 5    | -0.759036 | -1.569967 | 0.013043  | 0.506471  | 1.000      |
| 699  | GOBP-METAL-ION-TRANSPORT                          | 11   | -0.602221 | -1.570468 | 0.025572  | 0.529265  | 1.000      |
| 700  | REACTOME-NEUREXINS-AND-NEUROLIGINS                | 9    | -0.650585 | -1.572629 | 0.019417  | 0.547126  | 1.000      |
| 701  | REACTOME-TRANSMISSION-ACROSS-CHEMICAL-SYNAPSES    | 23   | -0.523620 | -1.576184 | 0.024882  | 0.560184  | 1.000      |
| 702  | GOBP-CALCIUM-ION-TRANSPORT-INTO-CYTOSOL           | 7    | -0.694495 | -1.577596 | 0.016925  | 0.584850  | 1.000      |
| 703  | GOBP-CYTOSOLIC-CALCIUM-ION-TRANSPORT              | 7    | -0.694495 | -1.582640 | 0.021614  | 0.596277  | 1.000      |
| 704  | GOBP-LEARNING                                     | 13   | -0.578894 | -1.593336 | 0.026515  | 0.579069  | 1.000      |
| 705  | REACTOME-RAS-ACTIVATION-UPON-CA2-INFLUX-THROUG... | 6    | -0.732040 | -1.609258 | 0.012676  | 0.536089  | 1.000      |
| 706  | REACTOME-CREB1-PHOSPHORYLATION-THROUGH-NMDA-RE... | 8    | -0.686836 | -1.613974 | 0.011189  | 0.554203  | 1.000      |
| 707  | REACTOME-LONG-TERM-POTENTIATION                   | 10   | -0.643855 | -1.640353 | 0.018494  | 0.468409  | 1.000      |
| 708  | REACTOME-NEURONAL-SYSTEM                          | 26   | -0.525283 | -1.645742 | 0.016336  | 0.484998  | 0.997      |
| 709  | GOBP-GLUTAMATE-RECEPTOR-SIGNALING-PATHWAY         | 17   | -0.758617 | -1.668039 | 0.010000  | 0.428699  | 0.995      |
| 710  | REACTOME-NEUROTRANSMITTER-RECEPTORS-AND-POSTSY... | 22   | -0.554506 | -1.686760 | 0.006002  | 0.394026  | 0.981      |
| 711  | REACTOME-TRANSCRIPTIONAL-REGULATION-BY-MECP2      | 7    | -0.758617 | -1.706046 | 0.009749  | 0.356542  | 0.960      |
| 712  | REACTOME-ACTIVATION-OF-NMDA-RECEPTORS-AND-POST... | 16   | -0.605770 | -1.712185 | 0.008883  | 0.382714  | 0.953      |
| 713  | GOBP-NEGATIVE-REGULATION-OF-PROTEIN-CATABOLIC-... | 5    | -0.832030 | -1.712568 | 0.005848  | 0.444565  | 0.952      |
| 714  | REACTOME-MAPK-FAMILY-SIGNALING-CASCADES           | 12   | -0.666907 | -1.760786 | 0.005141  | 0.306394  | 0.839      |
| 715  | REACTOME-ASSEMBLY-AND-CELL-SURFACE-PRESENTATIO... | 8    | -0.758077 | -1.772551 | 0.001376  | 0.335735  | 0.798      |
| 716  | REACTOME-UNBLOCKING-OF-NMDA-RECEPTORS-GLUTAMAT... | 12   | -0.664723 | -1.772840 | 0.003916  | 0.444888  | 0.797      |
| 717  | GOBP-INORGANIC-ION-TRANSMEMBRANE-TRANSPORT        | 9    | -0.726479 | -1.794163 | 0.000000  | 0.520146  | 0.716      |
| 718  | REACTOME-NEGATIVE-REGULATION-OF-NMDA-RECEPTOR-... | 8    | -0.758077 | -1.820415 | 0.005420  | 0.749830  | 0.596      |

End of Table

Supplementary Table S14: BG early profile (1 DPL peak) GSEA results.

| Begin of Table S14 |                                                    |               |      |          |          |           |           |            |
|--------------------|----------------------------------------------------|---------------|------|----------|----------|-----------|-----------|------------|
|                    | NAME                                               | ID            | SIZE | ES       | NES      | NOM.p.val | FDR.q.val | FWER.p.val |
| 0                  | GOBP-REGIONALIZATION                               | GO-0003002    | 6    | 0.795552 | 2.033180 | 0.000000  | 0.374573  | 0.380      |
| 1                  | GOBP-PATTERN-SPECIFICATION_PROCESS                 | GO-0007389    | 6    | 0.795552 | 1.997639 | 0.000000  | 0.254615  | 0.471      |
| 2                  | GOBP-REGULATION_OF_NEUROTRANSMITTER_RECEPTOR_A...  | GO-0009601    | 13   | 0.556547 | 1.873164 | 0.000000  | 0.476056  | 0.826      |
| 3                  | GOBP-MEMORY                                        | GO-0007613    | 13   | 0.560787 | 1.822978 | 0.006780  | 0.505561  | 0.916      |
| 4                  | GOBP_POSITIVE_REGULATION_OF_NEURON_PROJECTION...   | GO-0010976    | 5    | 0.776988 | 1.820985 | 0.014793  | 0.410562  | 0.923      |
| 5                  | REACTOME-SIGNALING-BY_NTRK2-TRKB                   | R-RNO-9006115 | 6    | 0.697617 | 1.806138 | 0.017391  | 0.381213  | 0.945      |
| 6                  | GOBP_CATION_TRANSPORT                              | GO-0006812    | 25   | 0.440951 | 1.797742 | 0.004425  | 0.343217  | 0.952      |
| 7                  | GOBP-REGULATION_OF_CATION_CHANNEL_ACTIVITY         | GO-2001257    | 14   | 0.517522 | 1.784610 | 0.003546  | 0.327694  | 0.965      |
| 8                  | GOBP-REGULATION_OF_CATION_TRANSMEMBRANE_TRANSPORT  | GO-1904062    | 16   | 0.493500 | 1.756228 | 0.007117  | 0.353100  | 0.985      |
| 9                  | GOBP-REGULATION_OF_NMDA_RECEPTOR_ACTIVITY          | GO-2000310    | 10   | 0.567724 | 1.740969 | 0.009901  | 0.347295  | 0.990      |
| 10                 | GOBP-LONG-TERM-MEMORY                              | GO-0007616    | 6    | 0.650395 | 1.617003 | 0.056548  | 0.625724  | 1.000      |
| 11                 | GOBP-REGULATION_OF_SIGNALING_RECEPTOR_ACTIVITY     | GO-0010469    | 14   | 0.472601 | 1.602173 | 0.045752  | 0.618898  | 1.000      |
| 12                 | GOBP-RESPONSE_TO_NERVE_GROWTH_FACTOR               | GO-1990089    | 7    | 0.589754 | 1.595750 | 0.050746  | 0.589619  | 1.000      |
| 13                 | GOBP_CATION_TRANSMEMBRANE_TRANSPORT                | GO-0008655    | 18   | 0.446054 | 1.588654 | 0.034188  | 0.566391  | 1.000      |
| 14                 | GOBP-REGULATION_OF_CELL_PROJECTION_ORGANIZATION    | GO-0031344    | 20   | 0.418111 | 1.583646 | 0.022901  | 0.541412  | 1.000      |
| 15                 | GOBP-DEVELOPMENTAL-CELL-GROWTH                     | GO-0048588    | 5    | 0.683493 | 1.551274 | 0.060150  | 0.588788  | 1.000      |
| 16                 | GOBP-REGULATION_OF_PHOSPHOLIPASE_ACTIVITY          | GO-0010517    | 6    | 0.609756 | 1.549827 | 0.051672  | 0.558037  | 1.000      |
| 17                 | GOBP-REGULATION_OF_MEMBRANE_POTENTIAL              | GO-0042391    | 17   | 0.436748 | 1.549519 | 0.011450  | 0.527735  | 1.000      |
| 18                 | GOBP_POSITIVE_REGULATION_OF_CELL_PROJECTION_OR...  | GO-0031346    | 10   | 0.509386 | 1.535480 | 0.055363  | 0.533615  | 1.000      |
| 19                 | GOBP-REGULATION_OF_POSTSYNAPTIC_MEMBRANE_POTEN...  | GO-0060078    | 14   | 0.453953 | 1.516340 | 0.062044  | 0.554028  | 1.000      |
| 20                 | GOBP-NEGATIVE-REGULATION_OF_NEURON_APOPTOTIC_P...  | GO-0043524    | 8    | 0.522920 | 1.497864 | 0.082822  | 0.572828  | 1.000      |
| 21                 | GOBP-REGULATION_OF_LIPASE_ACTIVITY                 | GO-0060191    | 6    | 0.609756 | 1.495094 | 0.072674  | 0.553403  | 1.000      |
| 22                 | REACTOME-UNBLOCKING_OF_NMDA_RECEPTORS-GLUTAMAT...  | R-RNO-438066  | 12   | 0.464444 | 1.490851 | 0.063694  | 0.539180  | 1.000      |
| 23                 | REACTOME-PROTEIN-PROTEIN-INTERACTIONS-AT_SYNAPSES  | R-RNO-6794362 | 12   | 0.459785 | 1.480677 | 0.078231  | 0.539346  | 1.000      |
| 24                 | GOBP-BEHAVIOR                                      | GO-0007610    | 32   | 0.335125 | 1.448239 | 0.042857  | 0.595613  | 1.000      |
| 25                 | GOBP-REGULATION_OF_PHOSPHOLIPASE_C_ACTIVITY        | GO-1900274    | 5    | 0.617969 | 1.423842 | 0.118980  | 0.634326  | 1.000      |
| 26                 | GOBP_POSITIVE_REGULATION_OF_LIPASE_ACTIVITY        | GO-0060193    | 5    | 0.617969 | 1.423718 | 0.119444  | 0.611125  | 1.000      |
| 27                 | GOBP-IONOTROPIC-GLUTAMATE-RECEPTOR-SIGNALING_P...  | GO-0035235    | 9    | 0.474758 | 1.412292 | 0.085366  | 0.617777  | 1.000      |
| 28                 | GOBP_PERIPHERAL_NERVOUS_SYSTEM_DEVELOPMENT         | GO-0007422    | 9    | 0.495494 | 1.396987 | 0.102719  | 0.634366  | 1.000      |
| 29                 | GOBP-NEURON_PROJECTION_ORGANIZATION                | GO-0106027    | 8    | 0.492915 | 1.389429 | 0.103030  | 0.632393  | 1.000      |
| 30                 | GOBP-REGULATION_OF_TRANSPORTER_ACTIVITY            | GO-0032409    | 17   | 0.382473 | 1.386217 | 0.064777  | 0.619928  | 1.000      |
| 31                 | REACTOME_SYNAPTIC_ADHESION-LIKE-MOLECULES          | R-RNO-8849932 | 9    | 0.480187 | 1.384744 | 0.119632  | 0.604215  | 1.000      |
| 32                 | GOBP-NEUROTROPHIN-SIGNALING-PATHWAY                | GO-0038179    | 6    | 0.538930 | 1.380173 | 0.116071  | 0.596165  | 1.000      |
| 33                 | GOBP-RECEPTOR-METABOLIC-PROCESS                    | GO-0043112    | 5    | 0.595182 | 1.379532 | 0.126582  | 0.580186  | 1.000      |
| 34                 | GOBP_POSITIVE_REGULATION_OF_PROTEIN-TYROSINE_K...  | GO-0061098    | 5    | 0.578313 | 1.368779 | 0.117493  | 0.590172  | 1.000      |
| 35                 | GOBP-REGULATION_OF_SYNAPSE_STRUCTURE_OR_ACTIVITY   | GO-0050803    | 11   | 0.435506 | 1.367590 | 0.134948  | 0.576764  | 1.000      |
| 36                 | GOBP-RECEPTOR-INTERNALIZATION                      | GO-0031623    | 5    | 0.593162 | 1.367022 | 0.111979  | 0.562235  | 1.000      |
| 37                 | GOBP-REGULATION_OF_PEPITIDYL-SERINE-PHOSPHORYLA... | GO-0033135    | 8    | 0.485175 | 1.366892 | 0.089286  | 0.547740  | 1.000      |
| 38                 | GOBP-SENSORY_PERCEPTION_OF_PAIN                    | GO-0019233    | 5    | 0.573679 | 1.339308 | 0.137755  | 0.597092  | 1.000      |
| 39                 | GOBP-REGULATION_OF_NEURON_PROJECTION-DEVELOPMENT   | GO-0010975    | 16   | 0.370848 | 1.337354 | 0.116981  | 0.586709  | 1.000      |
| 40                 | GOBP-SENSORY_PERCEPTION                            | GO-0007606    | 9    | 0.455696 | 1.333043 | 0.128028  | 0.581937  | 1.000      |



Continuation of Table S14

| NAME                                                  | ID            | SIZE | ES       | NES      | NOM.p.val | FDR.q.val | FWER.p.val |
|-------------------------------------------------------|---------------|------|----------|----------|-----------|-----------|------------|
| 41 GOBP-REGULATION-OF-NEURON-DIFFERENTIATION          | GO-0045664    | 5    | 0.580022 | 1.330974 | 0.151596  | 0.572494  | 1.000      |
| 42 REACTOME-ACTIVATION-OF-NMDA-RECEPTORS-AND-POST...  | R-RNO-442755  | 16   | 0.365657 | 1.330818 | 0.122744  | 0.559507  | 1.000      |
| 43 GOBP-REGULATION-OF-PROTEIN-TYROSINEKINASE-ACT...   | GO-0061097    | 5    | 0.578313 | 1.328704 | 0.122016  | 0.551767  | 1.000      |
| 44 GOBP-LOCOMOTORY-BEHAVIOR                           | GO-0007626    | 7    | 0.494400 | 1.323526 | 0.146199  | 0.550826  | 1.000      |
| 45 GOBP-LONG-TERM-SYNAPTIC-DEPRESSION                 | GO-0060292    | 5    | 0.563514 | 1.320130 | 0.142857  | 0.546482  | 1.000      |
| 46 GOBP-NEUROTROPHIN-TRK-RECEPTOR-SIGNALING-PATHWAY   | GO-0048011    | 6    | 0.538930 | 1.319499 | 0.126471  | 0.536203  | 1.000      |
| 47 GOBP-REGULATION-OF-POSTSYNAPSE-ORGANIZATION        | GO-0009175    | 6    | 0.545098 | 1.317964 | 0.144847  | 0.528018  | 1.000      |
| 48 GOBP-NUCLEAR-TRANSPORT                             | GO-0051169    | 5    | 0.554217 | 1.313552 | 0.144022  | 0.525729  | 1.000      |
| 49 GOBP-POSITIVE-REGULATION-OF-PEPTIDYL-SERINE-PH...  | GO-00033138   | 8    | 0.485175 | 1.307605 | 0.151057  | 0.526956  | 1.000      |
| 50 REACTOME-LONG-TERM-POTENTIATION                    | R-HSA-9620244 | 10   | 0.426928 | 1.295503 | 0.141892  | 0.542745  | 1.000      |
| 51 REACTOME-SIGNALING-BY-NTRKS                        | R-RNO-166520  | 18   | 0.336214 | 1.273990 | 0.140288  | 0.577693  | 1.000      |
| 52 GOBP-RESPONSE-TO-ETHANOL                           | GO-0045471    | 5    | 0.538866 | 1.272913 | 0.182306  | 0.569154  | 1.000      |
| 53 GOBP-COGNITION                                     | GO-00050890   | 28   | 0.307498 | 1.256976 | 0.123348  | 0.593327  | 1.000      |
| 54 GOBP-DIVALENT-INORGANIC-CATION-HOMEOSTASIS         | GO-00072507   | 13   | 0.360895 | 1.247641 | 0.153846  | 0.604446  | 1.000      |
| 55 GOBP-CELLULAR-ION-HOMEOSTASIS                      | GO-0006873    | 14   | 0.355879 | 1.232970 | 0.163121  | 0.628052  | 1.000      |
| 56 GOBP-MUSCLE-CELL-DEVELOPMENT                       | GO-0055001    | 5    | 0.542169 | 1.224567 | 0.192612  | 0.637110  | 1.000      |
| 57 GOBP-DEVELOPMENTAL-MATURATION                      | GO-0021700    | 5    | 0.518072 | 1.205502 | 0.241935  | 0.673235  | 1.000      |
| 58 GOBP-NERVOUS-SYSTEM-PROCESS                        | GO-00050877   | 38   | 0.270208 | 1.204162 | 0.211957  | 0.664721  | 1.000      |
| 59 GOBP-REGULATION-OF-TRANS-SYNAPTIC-SIGNALING        | GO-0009177    | 40   | 0.264572 | 1.199557 | 0.196532  | 0.665228  | 1.000      |
| 60 GOBP-POSITIVE-REGULATION-OF-CELL-GROWTH            | GO-00030307   | 6    | 0.487905 | 1.197148 | 0.238095  | 0.660755  | 1.000      |
| 61 GOBP-REGULATION-OF-CYTOSOLIC-CALCIUM-ION-CONCE...  | GO-0051480    | 13   | 0.360895 | 1.193457 | 0.240678  | 0.659144  | 1.000      |
| 62 GOBP-REGULATION-OF-CELL-SIZE                       | GO-0008361    | 5    | 0.512112 | 1.183697 | 0.248021  | 0.672083  | 1.000      |
| 63 GOBP-ORGANIC-ACID-TRANSPORT                        | GO-0015849    | 7    | 0.444444 | 1.173247 | 0.236923  | 0.686786  | 1.000      |
| 64 REACTOME-RAS-ACTIVATION-UPON-CA2-INFLUX-THROUGH... | R-HSA-442982  | 6    | 0.477844 | 1.172527 | 0.224377  | 0.677850  | 1.000      |
| 65 GOBP-POSITIVE-REGULATION-OF-HYDROLASE-ACTIVITY     | GO-0051345    | 16   | 0.327144 | 1.167971 | 0.217082  | 0.679120  | 1.000      |
| 66 GOBP-GLUTAMATE-RECEPTOR-SIGNALING-PATHWAY          | GO-0007215    | 17   | 0.315300 | 1.164302 | 0.195572  | 0.678056  | 1.000      |
| 67 GOBP-SYNAPTIC-SIGNALING                            | GO-0009536    | 47   | 0.255185 | 1.150386 | 0.262032  | 0.703371  | 1.000      |
| 68 GOBP-POSITIVE-REGULATION-OF-SYNAPTIC-TRANSMISSION  | GO-0050806    | 15   | 0.329092 | 1.138220 | 0.278985  | 0.724065  | 1.000      |
| 69 GOBP-REGULATION-OF-DEVELOPMENTAL-GROWTH            | GO-0048638    | 9    | 0.384908 | 1.132101 | 0.293919  | 0.729817  | 1.000      |
| 70 GOBP-ORGANIC-ANION-TRANSPORT                       | GO-0015711    | 6    | 0.439024 | 1.102555 | 0.308333  | 0.797133  | 1.000      |
| 71 GOBP-AMINO-ACID-TRANSPORT                          | GO-0006865    | 6    | 0.439024 | 1.101150 | 0.305476  | 0.789939  | 1.000      |
| 72 GOBP-CELL-PROJECTION-ORGANIZATION                  | GO-0030030    | 34   | 0.253033 | 1.097412 | 0.305000  | 0.789395  | 1.000      |
| 73 GOBP-REGULATION-OF-NEURONAL-SYNAPTIC-PLASTICITY    | GO-0048168    | 7    | 0.407407 | 1.096331 | 0.293255  | 0.781742  | 1.000      |
| 74 HALMARK-KRAS-SIGNALING-UP                          | M5953         | 6    | 0.440225 | 1.094307 | 0.327635  | 0.776511  | 1.000      |
| 75 GOBP-CARBOXYLIC-ACID-TRANSPORT                     | GO-0046942    | 6    | 0.439024 | 1.090292 | 0.336158  | 0.777030  | 1.000      |
| 76 GOBP-DEVELOPMENTAL-GROWTH                          | GO-0048589    | 10   | 0.359641 | 1.086984 | 0.326797  | 0.774748  | 1.000      |
| 77 REACTOME-CREB1-PHOSPHORYLATION-THROUGH-NMDA-RE...  | R-RNO-442742  | 8    | 0.385350 | 1.080723 | 0.354232  | 0.780394  | 1.000      |
| 78 GOBP-FATTY-ACID-TRANSPORT                          | GO-0015908    | 6    | 0.430383 | 1.076296 | 0.314103  | 0.780704  | 1.000      |
| 79 GOBP-NEGATIVE-REGULATION-OF-SYNAPTIC-TRANSMISSION  | GO-0050805    | 6    | 0.430383 | 1.076296 | 0.356948  | 0.771920  | 1.000      |
| 80 REACTOME-TRANSCRIPTIONAL-REGULATION-BY-MECP2       | R-RNO-8986944 | 7    | 0.415662 | 1.074945 | 0.342342  | 0.765758  | 1.000      |
| 81 GOBP-POSITIVE-REGULATION-OF-DEVELOPMENTAL-GROWTH   | GO-0048639    | 8    | 0.391848 | 1.074624 | 0.345345  | 0.757375  | 1.000      |
| 82 GOBP-NEGATIVE-REGULATION-OF-NEURON-DEATH           | GO-1901215    | 11   | 0.350828 | 1.071086 | 0.335526  | 0.757026  | 1.000      |
| 83 GOBP-REGULATION-OF-ION-TRANSPORT                   | GO-0043269    | 36   | 0.241413 | 1.069443 | 0.376190  | 0.751694  | 1.000      |

Continuation of Table S14

| NAME | ID                                                 | SIZE | ES       | NES      | NOM.p.val | FDR.q.val | FWER.p.val |
|------|----------------------------------------------------|------|----------|----------|-----------|-----------|------------|
| 84   | GOBP-METAL-ION-HOMEOSTASIS                         | 14   | 0.311357 | 1.069291 | 0.342373  | 0.743143  | 1.000      |
| 85   | GOBP-CHEMICAL-SYNAPTIC-TRANSMISSION_POSTSYNAPTIC   | 9    | 0.368604 | 1.069141 | 0.344322  | 0.734907  | 1.000      |
| 86   | GOBP-REGULATION-OF-NERVOUS-SYSTEM-PROCESS          | 8    | 0.370539 | 1.065195 | 0.364458  | 0.735540  | 1.000      |
| 87   | GOBP-CALCIUM-ION-TRANSPORT                         | 11   | 0.326203 | 1.057797 | 0.363636  | 0.744813  | 1.000      |
| 88   | GOBP-REGULATION-OF-TRANSMEMBRANE-TRANSPORT         | 23   | 0.272029 | 1.055202 | 0.404255  | 0.742345  | 1.000      |
| 89   | GOBP-ION-HOMEOSTASIS                               | 16   | 0.291622 | 1.040765 | 0.412451  | 0.768703  | 1.000      |
| 90   | GOBP-NERVE-DEVELOPMENT                             | 9    | 0.360256 | 1.038763 | 0.366154  | 0.764999  | 1.000      |
| 91   | GOBP-LONG-TERM-SYNAPTIC-POTENTIATION               | 12   | 0.316767 | 1.038123 | 0.382550  | 0.758268  | 1.000      |
| 92   | GOBP-TRANSMEMBRANE-TRANSPORT                       | 27   | 0.255763 | 1.037034 | 0.401914  | 0.752712  | 1.000      |
| 93   | GOBP-CELL-CELL-SIGNALING                           | 56   | 0.228038 | 1.032624 | 0.461538  | 0.755162  | 1.000      |
| 94   | GOBP-MONOCARBOXYLIC-ACID-TRANSPORT                 | 5    | 0.433735 | 1.023149 | 0.398844  | 0.769170  | 1.000      |
| 95   | GOBP-REGULATION-OF-SYNAPTIC-PLASTICITY             | 21   | 0.259426 | 1.006589 | 0.420863  | 0.801096  | 1.000      |
| 96   | GOBP-CELLULAR-COMPONENT-MAINTENANCE                | 5    | 0.432154 | 1.005735 | 0.398396  | 0.795378  | 1.000      |
| 97   | GOBP-DICARBOXYLIC-ACID-TRANSPORT                   | 5    | 0.433735 | 1.005512 | 0.422977  | 0.787825  | 1.000      |
| 98   | GOBP-ACIDIC-AMINO-ACID-TRANSPORT                   | 5    | 0.433735 | 1.005445 | 0.427778  | 0.780020  | 1.000      |
| 99   | GOBP-METAL-ION-TRANSPORT                           | 11   | 0.326203 | 0.996820 | 0.425532  | 0.792439  | 1.000      |
| 100  | GOBP-SYNAPSE-ORGANIZATION                          | 17   | 0.276010 | 0.990800 | 0.460076  | 0.801108  | 1.000      |
| 101  | GOBP-STRIATED-MUSCLE-CELL-DIFFERENTIATION          | 9    | 0.341772 | 0.989157 | 0.428571  | 0.795412  | 1.000      |
| 102  | GOBP-RESPONSE-TO-MONOSACCHARIDE                    | 5    | 0.409639 | 0.973442 | 0.441096  | 0.824746  | 1.000      |
| 103  | GOBP-POSITIVE-REGULATION-OF-TRANSMEMBRANE-TRAN...  | 7    | 0.364674 | 0.973000 | 0.429429  | 0.817939  | 1.000      |
| 104  | GOBP-POSITIVE-REGULATION-OF-AXONOGENESIS           | 5    | 0.421498 | 0.963786 | 0.497175  | 0.832291  | 1.000      |
| 105  | GOBP-REGULATION-OF-CELLULAR-COMPONENT-SIZE         | 7    | 0.361878 | 0.960598 | 0.461538  | 0.832096  | 1.000      |
| 106  | REACTOME-NEGATIVE-REGULATION-OF-NMDA-RECEPTOR-...  | 8    | 0.340328 | 0.959167 | 0.486567  | 0.827729  | 1.000      |
| 107  | GOBP-POSITIVE-REGULATION-OF-GROWTH                 | 9    | 0.317078 | 0.958318 | 0.485981  | 0.822102  | 1.000      |
| 108  | REACTOME-NEURONAL-SYSTEM                           | 26   | 0.237341 | 0.958216 | 0.515021  | 0.814918  | 1.000      |
| 109  | HALLMARK-P13K-AKT-MTOR-SIGNALING                   | 6    | 0.376224 | 0.953599 | 0.497297  | 0.818473  | 1.000      |
| 110  | GOBP-POSITIVE-REGULATION-OF-TRANSFERASE-ACTIVITY   | 20   | 0.250000 | 0.951431 | 0.514925  | 0.816169  | 1.000      |
| 111  | REACTOME-ASSEMBLY-AND-CELL-SURFACE-PRESENTATIO-... | 8    | 0.340328 | 0.941593 | 0.530675  | 0.830928  | 1.000      |
| 112  | GOBP-RESPONSE-TO-CARBOHYDRATE                      | 5    | 0.409639 | 0.940428 | 0.464986  | 0.826241  | 1.000      |
| 113  | GOBP-POSITIVE-REGULATION-OF-PROTEIN-KINASE-ACT-... | 19   | 0.246377 | 0.937982 | 0.569853  | 0.824475  | 1.000      |
| 114  | GOBP-POSITIVE-REGULATION-OF-BINDING                | 6    | 0.381388 | 0.935662 | 0.510204  | 0.822769  | 1.000      |
| 115  | GOBP-POSITIVE-REGULATION-OF_PHOSPHORUS-METABOL-... | 24   | 0.234375 | 0.933318 | 0.549783  | 0.816495  | 1.000      |
| 116  | REACTOME-TRAFFICKING-OF-AMPA-RECEPTORS             | 11   | 0.302856 | 0.934727 | 0.529032  | 0.810934  | 1.000      |
| 117  | GOBP-PEPTIDYL-SERINE-MODIFICATION                  | 12   | 0.289577 | 0.927907 | 0.539519  | 0.819104  | 1.000      |
| 118  | GOBP-POSITIVE-REGULATION-OF-CATALYTIC-ACTIVITY     | 30   | 0.216781 | 0.915958 | 0.561947  | 0.840105  | 1.000      |
| 119  | GOBP-MATERNAL-PROCESS-INVOLVED-IN-FEMALE-PREGN-... | 5    | 0.394862 | 0.908630 | 0.530120  | 0.849826  | 1.000      |
| 120  | GOBP-POSITIVE-REGULATION-OF-PROTEIN_PHOSPHORYL-... | 23   | 0.230769 | 0.904863 | 0.584746  | 0.851065  | 1.000      |
| 121  | GOBP-POSTSYNAPSE-ORGANIZATION                      | 10   | 0.301895 | 0.904744 | 0.590476  | 0.844335  | 1.000      |
| 122  | GOBP-RECEPTOR-MEDIATED-ENDOCYTOSIS                 | 6    | 0.362353 | 0.904330 | 0.582386  | 0.838338  | 1.000      |
| 123  | GOBP-POSITIVE-REGULATION-OF-PROTEIN-MODIFICATI-... | 23   | 0.230769 | 0.903878 | 0.597744  | 0.832607  | 1.000      |
| 124  | GOBP-REGULATION-OF-HORMONE-LEVELS                  | 12   | 0.280914 | 0.902472 | 0.586441  | 0.829060  | 1.000      |
| 125  | GOBP-CARBOHYDRATE-DERIVATIVE-METABOLIC-PROCESS     | 7    | 0.345679 | 0.901310 | 0.542773  | 0.825067  | 1.000      |
| 126  | GOBP-CELLULAR-HOMEOSTASIS                          | 18   | 0.248577 | 0.896771 | 0.564854  | 0.828038  | 1.000      |

Continuation of Table S14

| NAME | ID                                                 | SIZE | ES       | NES      | NOM.p.val | FDR.q.val | FWER.p.val |
|------|----------------------------------------------------|------|----------|----------|-----------|-----------|------------|
| 127  | GOBP-POSITIVE-REGULATION_OF_CATION_TRANSMEMBRAN... | 5    | 0.388807 | 0.896107 | 0.580381  | 0.822969  | 1.000      |
| 128  | GOBP-INOSITOL_LIPID-MEDIATED-SIGNALING             | 8    | 0.316281 | 0.893039 | 0.585443  | 0.822919  | 1.000      |
| 129  | GOBP-ORGANOPHOSPHATE-METABOLIC-PROCESS             | 7    | 0.333333 | 0.891909 | 0.549206  | 0.818998  | 1.000      |
| 130  | GOBP-REGULATION_OF_ORGAN-GROWTH                    | 5    | 0.373494 | 0.890604 | 0.586301  | 0.815375  | 1.000      |
| 131  | GOBP-ENDOCYTOSIS                                   | 8    | 0.321347 | 0.883073 | 0.585586  | 0.825358  | 1.000      |
| 132  | GOBP-ORGAN-GROWTH                                  | 5    | 0.373494 | 0.867635 | 0.620596  | 0.851432  | 1.000      |
| 133  | GOBP-CHEMICAL-HOMEOSTASIS                          | 23   | 0.217691 | 0.866808 | 0.692982  | 0.846693  | 1.000      |
| 134  | GOBP-REGULATION_OF_AXONOGENESIS                    | 7    | 0.323434 | 0.866770 | 0.587692  | 0.840499  | 1.000      |
| 135  | GOBP-REGULATION_OF_TRANSPORT                       | 44   | 0.187517 | 0.861945 | 0.700535  | 0.843909  | 1.000      |
| 136  | GOBP-NEURON-DEVELOPMENT                            | 33   | 0.197215 | 0.840987 | 0.730594  | 0.881311  | 1.000      |
| 137  | GOBP-POSITIVE-REGULATION_OF_PEPTIDYL-TYROSINE...   | 8    | 0.296511 | 0.813904 | 0.685294  | 0.928365  | 1.000      |
| 138  | GOBP-CELL_JUNCTION-ORGANIZATION                    | 19   | 0.217074 | 0.807625 | 0.755102  | 0.934495  | 1.000      |
| 139  | GOBP-POSITIVE-REGULATION_OF_NEUROGENESIS           | 12   | 0.248249 | 0.798608 | 0.731707  | 0.946356  | 1.000      |
| 140  | GOBP-REGULATION_OF_CYTOSKELETON-ORGANIZATION       | 5    | 0.349398 | 0.798413 | 0.728022  | 0.940125  | 1.000      |
| 141  | GOBP-POLYSACCHARIDE-METABOLIC-PROCESS              | 5    | 0.339283 | 0.793756 | 0.731507  | 0.942519  | 1.000      |
| 142  | GOBP-POSITIVE-REGULATION_OF_NERVOUS-SYSTEM.DEV...  | 12   | 0.248249 | 0.793264 | 0.761745  | 0.936779  | 1.000      |
| 143  | GOBP-POSITIVE-REGULATION_OF_CELL-DEVELOPMENT       | 12   | 0.248249 | 0.792632 | 0.781351  | 0.931519  | 1.000      |
| 144  | GOBP-MYOTUBE-DIFFERENTIATION                       | 5    | 0.325301 | 0.746720 | 0.809659  | 1.000000  | 1.000      |
| 145  | GOBP-NEURON-DIFFERENTIATION                        | 36   | 0.167530 | 0.740298 | 0.897059  | 1.000000  | 1.000      |
| 146  | GOBP-SENSORY-ORGAN-DEVELOPMENT                     | 8    | 0.259238 | 0.733515 | 0.780186  | 1.000000  | 1.000      |
| 147  | GOBP-DENDRITIC-MORPHOGENESIS                       | 6    | 0.292683 | 0.727726 | 0.820581  | 1.000000  | 1.000      |
| 148  | GOBP-DENDRITIC-SPINE-DEVELOPMENT                   | 6    | 0.292683 | 0.727455 | 0.788162  | 1.000000  | 1.000      |
| 149  | GOBP-REGULATION_OF_DEFENSE-RESPONSE                | 7    | 0.271769 | 0.727136 | 0.835694  | 1.000000  | 1.000      |
| 150  | GOBP-GENERATION_OF_PRECURSOR-METABOLITES-AND.E...  | 5    | 0.313253 | 0.725343 | 0.835227  | 1.000000  | 1.000      |
| 151  | GOBP-MUSCLE-CELL-DIFFERENTIATION                   | 10   | 0.243590 | 0.723570 | 0.848765  | 0.998903  | 1.000      |
| 152  | GOBP-INSULIN-SECRETION                             | 7    | 0.272025 | 0.722257 | 0.809231  | 0.994467  | 1.000      |
| 153  | GOBP-DENDRITIC-SPINE-MORPHOGENESIS                 | 5    | 0.315435 | 0.721876 | 0.846821  | 0.988669  | 1.000      |
| 154  | GOBP-REGULATION_OF_PROTEIN-PHOSPHORYLATION         | 26   | 0.179999 | 0.721078 | 0.848485  | 0.983493  | 1.000      |
| 155  | GOBP-GLIOGENESIS                                   | 12   | 0.223684 | 0.716417 | 0.845614  | 0.984438  | 1.000      |
| 156  | GOBP-REGULATION_OF_INFLAMMATORY-RESPONSE           | 7    | 0.271769 | 0.714030 | 0.842105  | 0.981635  | 1.000      |
| 157  | GOBP-PEPTIDE-SECRETION                             | 9    | 0.245444 | 0.713969 | 0.810056  | 0.975498  | 1.000      |
| 158  | GOBP-CELL-SURFACE-RECEPTOR-SIGNALING-PATHWAY_I...  | 15   | 0.197042 | 0.705349 | 0.888136  | 0.981056  | 1.000      |
| 159  | GOBP-POSITIVE-REGULATION_OF_MOLECULAR-FUNCTION     | 38   | 0.163384 | 0.701977 | 0.911765  | 0.979315  | 1.000      |
| 160  | GOBP-POSITIVE-REGULATION_OF_DEFENSE-RESPONSE       | 5    | 0.295127 | 0.691171 | 0.872396  | 0.987825  | 1.000      |
| 161  | GOBP-REGULATION_OF_LONG-TERM-SYNAPTIC-POTENTIA...  | 6    | 0.280488 | 0.688337 | 0.861963  | 0.985042  | 1.000      |
| 162  | GOBP-ACTIVATION_OF_PROTEIN-KINASE-ACTIVITY         | 11   | 0.225829 | 0.685366 | 0.858025  | 0.982414  | 1.000      |
| 163  | GOBP-PEPTIDE-HORMONE-SECRETION                     | 7    | 0.272025 | 0.677376 | 0.888889  | 0.986013  | 1.000      |
| 164  | GOBP-EMBRYO-DEVELOPMENT-ENDING-IN-BIRTH-OR-EGG...  | 9    | 0.227848 | 0.664860 | 0.860759  | 0.994652  | 1.000      |
| 165  | GOBP-REGULATION_OF_SYNAPTIC-TRANSMISSION-GLUTA...  | 12   | 0.199810 | 0.657028 | 0.936842  | 0.997048  | 1.000      |
| 166  | GOBP-PEPTIDYL-TYROSINE-MODIFICATION                | 10   | 0.217949 | 0.652299 | 0.905363  | 0.995832  | 1.000      |
| 167  | GOBP-GLIAL-CELL-DIFFERENTIATION                    | 10   | 0.217949 | 0.648116 | 0.915825  | 0.993686  | 1.000      |
| 168  | GOBP-REGULATION_OF_PEPTIDYL-TYROSINE-PHOSPHORY...  | 9    | 0.215190 | 0.642636 | 0.914191  | 0.992961  | 1.000      |
| 169  | GOBP-POSITIVE-REGULATION_OF_LONG-TERM-SYNAPTIC...  | 5    | 0.277109 | 0.642364 | 0.901370  | 0.987418  | 1.000      |

Continuation of Table S14

| NAME | ID                                                 | SIZE | ES        | NES       | NOM.p.val | FDR.q.val | FWER.p.val |
|------|----------------------------------------------------|------|-----------|-----------|-----------|-----------|------------|
| 170  | GOBP-POSITIVE-REGULATION_OF_DNA-BINDING..TRANSC... | 10   | 0.217949  | 0.637609  | 0.909091  | 0.985752  | 1.000      |
| 171  | GOBP-EMBRYONIC.MORPHOGENESIS                       | 6    | 0.251273  | 0.621357  | 0.943953  | 0.993251  | 1.000      |
| 172  | GOBP-CELLULAR-RESPONSE.TO-ABIOTIC-STIMULUS         | 7    | 0.234568  | 0.612392  | 0.945289  | 0.994035  | 1.000      |
| 173  | GOBP-SYNAPTIC.TRANSMISSION.GLUTAMATERGIC           | 13   | 0.186968  | 0.610930  | 0.963415  | 0.989322  | 1.000      |
| 174  | GOBP-TEMPERATURE.HOMEOSTASIS                       | 5    | 0.264083  | 0.603791  | 0.935484  | 0.988146  | 1.000      |
| 175  | GOBP-NEUROGENESIS                                  | 40   | 0.135842  | 0.598825  | 0.985849  | 0.985561  | 1.000      |
| 176  | GOBP-NEGATIVE-REGULATION_OF-ANION-TRANSPORT        | 8    | 0.212500  | 0.593632  | 0.969419  | 0.983221  | 1.000      |
| 177  | GOBP-RESPONSE.TO-NUTRIENT                          | 5    | 0.240964  | 0.557474  | 0.975000  | 0.994878  | 1.000      |
| 178  | GOBP-REGULATION_OF-METAL-ION..TRANSPORT            | 6    | 0.222248  | 0.555794  | 0.972678  | 0.989955  | 1.000      |
| 179  | GOBP-ANION..TRANSMEMBRANE..TRANSPORT               | 7    | 0.209877  | 0.538815  | 0.982609  | 0.990215  | 1.000      |
| 180  | GOBP-TELECEPHALON.DEVELOPMENT                      | 6    | 0.200215  | 0.513294  | 1.000000  | 0.991088  | 1.000      |
| 181  | GOBP-DENDRITE.DEVELOPMENT                          | 9    | -0.169825 | -0.421612 | 0.995792  | 0.997950  | 1.000      |
| 182  | REACTOME-GPCR.LIGAND-BINDING                       | 8    | -0.191630 | -0.456364 | 0.993865  | 0.996325  | 1.000      |
| 183  | GOBP-REGULATION_OF-PROTEIN.KINASE..ACTIVITY        | 22   | -0.152553 | -0.476431 | 0.992042  | 0.995066  | 1.000      |
| 184  | GOBP-REGULATION_OF-TRANSFERASE..ACTIVITY           | 22   | -0.152553 | -0.480209 | 0.997358  | 0.999202  | 1.000      |
| 185  | REACTOME-INTERFERON-SIGNALING                      | 6    | -0.249880 | -0.546301 | 0.979782  | 0.977704  | 1.000      |
| 186  | GOBP-NEURON-MIGRATION                              | 5    | -0.258937 | -0.547467 | 0.968504  | 0.979031  | 1.000      |
| 187  | GOBP-MUSCLE..TISSUE.DEVELOPMENT                    | 11   | -0.212192 | -0.554019 | 0.962910  | 0.977843  | 1.000      |
| 188  | GOBP-G-PROTEIN.COUPLED-GLUTAMATE-RECEPTOR.SIGN...  | 8    | -0.231319 | -0.558337 | 0.962853  | 0.977504  | 1.000      |
| 189  | GOBP-NEGATIVE-REGULATION_OF-ION-TRANSPORT          | 11   | -0.216081 | -0.566890 | 0.948468  | 0.975020  | 1.000      |
| 190  | GOBP-LIPID.EXPORT.FROM-CELL                        | 5    | -0.271597 | -0.569057 | 0.959016  | 0.975739  | 1.000      |
| 191  | GOBP-T-CELL-ACTIVATION                             | 8    | -0.242287 | -0.585993 | 0.940666  | 0.967468  | 1.000      |
| 192  | GOBP-POSITIVE-REGULATION_OF-SECRETION              | 6    | -0.271901 | -0.586346 | 0.944954  | 0.969097  | 1.000      |
| 193  | GOBP-G-PROTEIN.COUPLED-RECEPTOR-SIGNALING..PATHWAY | 18   | -0.200370 | -0.594394 | 0.934051  | 0.965623  | 1.000      |
| 194  | GOBP-INFLAMMATORY-RESPONSE                         | 12   | -0.231952 | -0.616344 | 0.922554  | 0.952071  | 1.000      |
| 195  | GOBP-POSITIVE-REGULATION_OF-CELLULAR-COMPONENT...  | 24   | -0.203035 | -0.636922 | 0.908740  | 0.937042  | 1.000      |
| 196  | GOBP-PEPTIDYL-AMINO-ACID-MODIFICATION              | 22   | -0.206343 | -0.652997 | 0.898123  | 0.924371  | 1.000      |
| 197  | GOBP-REGULATION_OF-ENDOCYTOSIS                     | 6    | -0.300046 | -0.661145 | 0.894009  | 0.918418  | 1.000      |
| 198  | GOBP-REGULATION_OF-CELL-DEVELOPMENT                | 15   | -0.230942 | -0.666005 | 0.889675  | 0.915462  | 1.000      |
| 199  | GOBP-REGULATION_OF-NERVOUS-SYSTEM.DEVELOPMENT      | 15   | -0.235938 | -0.672473 | 0.875342  | 0.910643  | 1.000      |
| 200  | GOBP-SKELETAL-MUSCLE-ORGAN.DEVELOPMENT             | 5    | -0.334096 | -0.679968 | 0.896147  | 0.904833  | 1.000      |
| 201  | GOBP-TAXIS                                         | 14   | -0.243338 | -0.681463 | 0.876902  | 0.905071  | 1.000      |
| 202  | GOBP-RESPONSE.TO-HEAT                              | 7    | -0.290321 | -0.682955 | 0.859873  | 0.905257  | 1.000      |
| 203  | GOBP-INNATE-IMMUNE-RESPONSE                        | 7    | -0.298775 | -0.685053 | 0.869894  | 0.904760  | 1.000      |
| 204  | REACTOME-POST-TRANSLATIONAL-PROTEIN-MODIFICATION   | 7    | -0.302892 | -0.687271 | 0.870207  | 0.904123  | 1.000      |
| 205  | GOBP-CELLULAR-COMPONENT-MORPHOGENESIS              | 24   | -0.220795 | -0.688067 | 0.853137  | 0.904996  | 1.000      |
| 206  | GOBP-DEFENSE-RESPONSE                              | 19   | -0.225312 | -0.689072 | 0.859395  | 0.905689  | 1.000      |
| 207  | GOBP-REGULATION_OF-NEUROGENESIS                    | 14   | -0.241124 | -0.690108 | 0.863388  | 0.906352  | 1.000      |
| 208  | GOBP-CIRCULATORY-SYSTEM-PROCESS                    | 5    | -0.328266 | -0.690497 | 0.867200  | 0.907709  | 1.000      |
| 209  | GOBP-RESPONSE.TO-ALKALOID                          | 5    | -0.333665 | -0.692290 | 0.874433  | 0.907645  | 1.000      |
| 210  | GOBP-REGULATION_OF-ANATOMICAL-STRUCTURE-MORPHO...  | 17   | -0.232867 | -0.695752 | 0.860027  | 0.905634  | 1.000      |
| 211  | GOBP-CELL-MORPHOGENESIS                            | 24   | -0.220795 | -0.698983 | 0.863937  | 0.903715  | 1.000      |
| 212  | GOBP-CELL-PART-MORPHOGENESIS                       | 24   | -0.220795 | -0.700919 | 0.853529  | 0.903406  | 1.000      |

Continuation of Table S14

| NAME | ID                                                | SIZE | ES        | NES       | NOM.p.val | FDR.q.val | FWER.p.val |
|------|---------------------------------------------------|------|-----------|-----------|-----------|-----------|------------|
| 213  | GOBP-MUSCLE.CONTRACTION                           | 5    | -0.336882 | -0.703906 | 0.882258  | 0.901710  | 1.000      |
| 214  | GOBP-REGULATION.OF.RECEPTOR.MEDIATED.ENDOCYTOSIS  | 5    | -0.348446 | -0.713329 | 0.851974  | 0.892453  | 1.000      |
| 215  | GOBP-MONOCARBOXYLIC.ACID.METABOLIC.PROCESS        | 6    | -0.322380 | -0.715135 | 0.848159  | 0.892147  | 1.000      |
| 216  | GOBP-PEPTIDE.METABOLIC.PROCESS                    | 12   | -0.266934 | -0.724419 | 0.811403  | 0.882653  | 1.000      |
| 217  | GOBP-POSITIVE.REGULATION.OF.INTRACELLULAR.SIGN... | 14   | -0.262033 | -0.731756 | 0.850214  | 0.875542  | 1.000      |
| 218  | GOBP-NEGATIVE.REGULATION.OF.PEPTIDASE.ACTIVITY    | 6    | -0.335684 | -0.735434 | 0.818040  | 0.872770  | 1.000      |
| 219  | GOBP-ACTIVATION.OF.MAPK-ACTIVITY                  | 6    | -0.336967 | -0.740621 | 0.801562  | 0.867809  | 1.000      |
| 220  | GOBP-IN.UTERO.EMBRYONIC.DEVELOPMENT               | 8    | -0.305708 | -0.740752 | 0.800298  | 0.869386  | 1.000      |
| 221  | GOBP-VESICLE.MEDIATED.TRANSPORT.IN.SYNAPSE        | 7    | -0.320928 | -0.740795 | 0.781818  | 0.871075  | 1.000      |
| 222  | GOBP-POSITIVE.REGULATION.OF.MAP.KINASE.ACTIVITY   | 6    | -0.336967 | -0.743018 | 0.810345  | 0.869985  | 1.000      |
| 223  | GOBP-NEGATIVE.REGULATION.OF.LIPID.METABOLIC.PR... | 5    | -0.359910 | -0.744028 | 0.811232  | 0.870377  | 1.000      |
| 224  | GOBP-POSITIVE.REGULATION.OF.PROTEIN.METABOLIC...  | 28   | -0.226118 | -0.746772 | 0.801556  | 0.868671  | 1.000      |
| 225  | GOBP-REGULATION.OF.PHOSPHORUS.METABOLIC.PROCESS   | 27   | -0.226993 | -0.748995 | 0.810323  | 0.867606  | 1.000      |
| 226  | GOBP-REGULATION.OF.INTRACELLULAR.SIGNAL.TRANS...  | 21   | -0.236480 | -0.749125 | 0.816406  | 0.869188  | 1.000      |
| 227  | REACTOME-TRANSCRIPTIONAL.REGULATION.OF.WHITE-A... | 6    | -0.340009 | -0.753964 | 0.786482  | 0.864581  | 1.000      |
| 228  | GOBP-CARBOHYDRATE.HOMEOSTASIS                     | 7    | -0.327619 | -0.755096 | 0.786237  | 0.864889  | 1.000      |
| 229  | GOBP-POSITIVE.REGULATION.OF.GLIOGENESIS           | 5    | -0.367355 | -0.756854 | 0.794913  | 0.864336  | 1.000      |
| 230  | GOBP-REGULATION.OF.LYMPHOCYTE-ACTIVATION          | 5    | -0.363501 | -0.759099 | 0.797030  | 0.863120  | 1.000      |
| 231  | GOBP-MULTICELLULAR-ORGANISMAL.RESPONSE.TO.STRESS  | 5    | -0.368926 | -0.763752 | 0.768852  | 0.858766  | 1.000      |
| 232  | GOBP-DEFENSE.RESPONSE.TO.OTHER-ORGANISM           | 9    | -0.306646 | -0.763813 | 0.777299  | 0.860439  | 1.000      |
| 233  | GOBP-ORGANIC-HYDROXY-COMPOUND.METABOLIC.PROCESS   | 7    | -0.329471 | -0.768195 | 0.767516  | 0.856178  | 1.000      |
| 234  | GOBP-REGULATION.OF.GLIOGENESIS                    | 5    | -0.367355 | -0.769565 | 0.771160  | 0.856067  | 1.000      |
| 235  | GOBP-HEART.DEVELOPMENT                            | 6    | -0.347948 | -0.775517 | 0.751903  | 0.849694  | 1.000      |
| 236  | GOBP-CARDIAC.MUSCLE.TISSUE.DEVELOPMENT            | 6    | -0.347948 | -0.778112 | 0.762557  | 0.847880  | 1.000      |
| 237  | GOBP-ORGANIC-HYDROXY-COMPOUND-TRANSPORT           | 6    | -0.357129 | -0.781629 | 0.725637  | 0.844799  | 1.000      |
| 238  | GOBP-MAPK.CASCADE                                 | 18   | -0.262669 | -0.782731 | 0.777933  | 0.845085  | 1.000      |
| 239  | GOBP-REGULATION.OF.MAP-KINASE-ACTIVITY            | 9    | -0.310818 | -0.782838 | 0.726172  | 0.846683  | 1.000      |
| 240  | GOBP-REGULATION.OF.ANATOMICAL-STRUCTURE-SIZE      | 10   | -0.299178 | -0.782893 | 0.745714  | 0.848366  | 1.000      |
| 241  | GOBP-CELLULAR-CARBOHYDRATE.METABOLIC.PROCESS      | 5    | -0.375523 | -0.785391 | 0.773148  | 0.846500  | 1.000      |
| 242  | GOBP-REGULATION.OF.MUSCLE-CELL-DIFFERENTIATION    | 6    | -0.355428 | -0.785527 | 0.743511  | 0.848105  | 1.000      |
| 243  | GOBP-NEGATIVE.REGULATION.OF-TRANSPORT             | 13   | -0.286187 | -0.785537 | 0.734551  | 0.849859  | 1.000      |
| 244  | GOBP-EXOCYTOSIS                                   | 11   | -0.300909 | -0.790332 | 0.742938  | 0.844853  | 1.000      |
| 245  | GOBP-MULTICELLULAR-ORGANISMAL.PROCESS             | 8    | -0.325989 | -0.790866 | 0.742560  | 0.845854  | 1.000      |
| 246  | GOBP-REGULATION.OF-PEPTIDE-HORMONE-SECRETION      | 6    | -0.363780 | -0.793880 | 0.748068  | 0.843151  | 1.000      |
| 247  | GOBP-REGULATION.OF-PEPTIDE-SECRETION              | 7    | -0.343115 | -0.803564 | 0.745038  | 0.830685  | 1.000      |
| 248  | GOBP-INORGANIC-ION-TRANSMEMBRANE-TRANSPORT        | 9    | -0.322544 | -0.803706 | 0.715774  | 0.832272  | 1.000      |
| 249  | GOBP-PROTEIN-CONTAINING-COMPLEX-SUBUNIT-ORGANI... | 14   | -0.289326 | -0.806501 | 0.701513  | 0.829799  | 1.000      |
| 250  | GOBP-REGULATION.OF-SYSTEM-PROCESS                 | 18   | -0.271833 | -0.809292 | 0.730028  | 0.827443  | 1.000      |
| 251  | GOBP-ADENYLATE-CYCLASE-INHIBITING-G-PROTEIN.CO... | 5    | -0.386404 | -0.809356 | 0.734158  | 0.829136  | 1.000      |
| 252  | REACTOME-NEUREXINS-AND-NEUROLIGINS                | 9    | -0.324146 | -0.809974 | 0.726471  | 0.830048  | 1.000      |
| 253  | GOBP-POSITIVE.REGULATION.OF-SIGNALING             | 34   | -0.237600 | -0.813645 | 0.738966  | 0.826352  | 1.000      |
| 254  | GOBP-EMBRYO.DEVELOPMENT                           | 14   | -0.288469 | -0.825061 | 0.682652  | 0.811049  | 1.000      |
| 255  | REACTOME-CLASS-C_3-METABOTROPIC-GLUTAMATE-PHER... | 7    | -0.349545 | -0.825956 | 0.676737  | 0.811449  | 1.000      |

Continuation of Table S14

| NAME                                                                          | ID            | SIZE | ES        | NES       | NOM.p.val | FDR.q.val | FWER.p.val |
|-------------------------------------------------------------------------------|---------------|------|-----------|-----------|-----------|-----------|------------|
| 256 GOBP-PROTEIN_PHOSPHORYLATION                                              | GO-0006468    | 34   | -0.244965 | -0.826224 | 0.701149  | 0.812819  | 1.000      |
| 257 GOBP-RESPONSE_TO_ALCOHOL                                                  | GO-0097305    | 11   | -0.312598 | -0.830026 | 0.688218  | 0.808631  | 1.000      |
| 258 GOBP-ORGANIC_ACID_METABOLIC_PROCESS                                       | GO-0006082    | 7    | -0.361574 | -0.830306 | 0.710879  | 0.809981  | 1.000      |
| 259 GOBP-RESPONSE_TO_CALCIUM_ION                                              | GO-0051592    | 6    | -0.380301 | -0.832963 | 0.689708  | 0.807619  | 1.000      |
| 260 GOBP-CELLULAR_RESPONSE_TO_NITROGEN_COMPOUND                               | GO-1901699    | 20   | -0.277458 | -0.837828 | 0.690958  | 0.802128  | 1.000      |
| 261 GOBP-MONOAMINE_TRANSPORT                                                  | GO-0015844    | 5    | -0.396070 | -0.838617 | 0.677083  | 0.802647  | 1.000      |
| 262 GOBP-NEGATIVE_REGULATION_OF_IMMUNE_SYSTEM_PROCESS                         | GO-0002683    | 5    | -0.403248 | -0.840231 | 0.722311  | 0.802037  | 1.000      |
| 263 GOBP-PEPTIDE_BIOSYNTHETIC_PROCESS                                         | GO-0043043    | 7    | -0.368201 | -0.842160 | 0.676971  | 0.800936  | 1.000      |
| 264 GOBP-NEUROTRANSMITTER_SECRETION                                           | GO-0007269    | 6    | -0.387671 | -0.842863 | 0.662461  | 0.801633  | 1.000      |
| 265 REACTOME_TRANSMISSION_ACROSS_CHEMICAL_SYNAPSES                            | R-RNO-112315  | 23   | -0.265954 | -0.845244 | 0.685601  | 0.799709  | 1.000      |
| 266 REACTOME_ONCOGENIC_MAPK_SIGNALING                                         | R-HSA-6802957 | 5    | -0.411024 | -0.845937 | 0.675719  | 0.800374  | 1.000      |
| 267 GOBP-AMIDE_BIOSYNTHETIC_PROCESS                                           | GO-0043604    | 7    | -0.381977 | -0.850134 | 0.685759  | 0.801679  | 1.000      |
| 268 GOBP-REGULATION_OF_NEUROTRANSMITTER_TRANSPORT                             | GO-0051588    | 6    | -0.381977 | -0.850134 | 0.685759  | 0.801679  | 1.000      |
| 269 REACTOME_NEUROTRANSMITTER_RECEPTORS_AND_POSTSYNAPTIC_TRANSMISSION         | R-RNO-112314  | 22   | -0.271442 | -0.851369 | 0.666229  | 0.797441  | 1.000      |
| 270 REACTOME_EXTRACELLULAR_MATRIX_ORGANIZATION                                | R-RNO-1474244 | 5    | -0.414832 | -0.854713 | 0.678627  | 0.793887  | 1.000      |
| 271 GOBP-RESPONSE_TO_GROWTH_FACTOR                                            | GO-0070848    | 18   | -0.285305 | -0.857323 | 0.648322  | 0.791391  | 1.000      |
| 272 GOBP-CALCIUM_ION_TRANSPORT_INTO_CYTOSOL                                   | GO-0060402    | 7    | -0.375595 | -0.857672 | 0.666170  | 0.792570  | 1.000      |
| 273 GOBP-CELL_MORPHOGENESIS_INVOLVED_IN_NEURON_DIFFERENTIATION                | GO-0048667    | 21   | -0.276004 | -0.857895 | 0.648074  | 0.793975  | 1.000      |
| 274 GOBP-MYELOID_LEUKOCYTE_ACTIVATION                                         | GO-0002274    | 8    | -0.359600 | -0.860698 | 0.630277  | 0.791256  | 1.000      |
| 275 GOBP-CELL_MORPHOGENESIS_INVOLVED_IN_NEURON_DIFFERENTIATION                | GO-0000904    | 21   | -0.276004 | -0.862922 | 0.673307  | 0.789473  | 1.000      |
| 276 GOBP-AXON_DEVELOPMENT                                                     | GO-0061564    | 18   | -0.289943 | -0.863928 | 0.655827  | 0.789675  | 1.000      |
| 277 REACTOME_DEATH_RECEPTOR_SIGNALING                                         | R-RNO-73887   | 5    | -0.419493 | -0.865334 | 0.670017  | 0.789222  | 1.000      |
| 278 GOBP-MUSCLE_SYSTEM_PROCESS                                                | GO-0003012    | 9    | -0.350214 | -0.867375 | 0.643895  | 0.787891  | 1.000      |
| 279 GOBP-CYTOSOLIC_CALCIUM_ION_TRANSPORT                                      | GO-0060401    | 7    | -0.375595 | -0.868712 | 0.635693  | 0.787531  | 1.000      |
| 280 GOBP-REGULATION_OF_VESICLE_MEDIATED_TRANSPORT                             | GO-0060627    | 12   | -0.315591 | -0.869931 | 0.620934  | 0.787388  | 1.000      |
| 281 GOBP-PROTEIN_COMPLEX_OLIGOMERIZATION                                      | GO-0051259    | 6    | -0.397790 | -0.874762 | 0.635258  | 0.781468  | 1.000      |
| 282 GOBP-RESPONSE_TO_PEPTIDE                                                  | GO-1901652    | 18   | -0.292727 | -0.877093 | 0.627717  | 0.779537  | 1.000      |
| 283 GOBP-CALCIUM_ION_TRANSMEMBRANE_TRANSPORT                                  | GO-0070588    | 7    | -0.375595 | -0.877148 | 0.628788  | 0.781237  | 1.000      |
| 284 GOBP-ADENYLATE_CYCLASE_MODULATING_G_PROTEIN_COUPLED_RECEPTOR_ACTIVATION   | GO-0007188    | 11   | -0.335552 | -0.879306 | 0.595652  | 0.779339  | 1.000      |
| 285 GOBP-NEGATIVE_REGULATION_OF_CYSSTEINE_TYPE_ENDOPLASMIC_RETICULUM_FUNCTION | GO-2000117    | 5    | -0.425797 | -0.880236 | 0.641654  | 0.779557  | 1.000      |
| 286 GOBP-MUSCLE_ORGAN_DEVELOPMENT                                             | GO-0007517    | 9    | -0.355412 | -0.880239 | 0.603976  | 0.781350  | 1.000      |
| 287 GOBP-CARBOHYDRATE_BIOSYNTHETIC_PROCESS                                    | GO-0016051    | 5    | -0.430286 | -0.883736 | 0.650382  | 0.777398  | 1.000      |
| 288 GOBP-CALCIUM_MEDIATED_SIGNALING                                           | GO-0019722    | 10   | -0.344400 | -0.884372 | 0.616783  | 0.778263  | 1.000      |
| 289 GOBP-NEGATIVE_REGULATION_OF_CATALYTIC_ACTIVITY                            | GO-0043086    | 17   | -0.299231 | -0.888683 | 0.623790  | 0.772936  | 1.000      |
| 290 REACTOME_DISEASES_OF_SIGNAL_TRANSDUCTION_BY_G_PROTEIN_COUPLING            | R-HSA-5663202 | 12   | -0.328506 | -0.890767 | 0.600559  | 0.771091  | 1.000      |
| 291 GOBP-RESPONSE_TO_PEPTIDE_HORMONE                                          | GO-0043434    | 13   | -0.320200 | -0.891461 | 0.603878  | 0.771743  | 1.000      |
| 292 GOBP-HORMONE_TRANSPORT                                                    | GO-0009914    | 9    | -0.357943 | -0.893159 | 0.601783  | 0.770589  | 1.000      |
| 293 GOBP-POSITIVE_REGULATION_OF_RESPONSE_TO_EXTERNAL_STIMULUS                 | GO-0032103    | 9    | -0.357943 | -0.893159 | 0.601783  | 0.770589  | 1.000      |
| 294 GOBP-LIPID_LOCALIZATION                                                   | GO-0010876    | 10   | -0.349426 | -0.898180 | 0.584962  | 0.765836  | 1.000      |
| 295 GOBP-NUCLEOBASE_CONTAINING_SMALL_MOLECULE_METABOLISM                      | GO-0055086    | 6    | -0.409846 | -0.903127 | 0.597201  | 0.759328  | 1.000      |
| 296 GOBP-ANIMAL_ORGAN_MORPHOGENESIS                                           | GO-0009887    | 12   | -0.333184 | -0.903343 | 0.572028  | 0.760775  | 1.000      |
| 297 GOBP-REGULATION_OF_CARBOHYDRATE_BIOSYNTHETIC_PROCESS                      | GO-0043255    | 5    | -0.430286 | -0.903514 | 0.608108  | 0.762280  | 1.000      |
| 298 GOBP-REGULATION_OF_SMALL_MOLECULE_METABOLIC_PROCESS                       | GO-0062012    | 9    | -0.370130 | -0.904961 | 0.608889  | 0.761663  | 1.000      |

Continuation of Table S14

| NAME | ID                                                | SIZE          | ES | NES       | NOM.p.val | FDR.q.val | FWER.p.val |
|------|---------------------------------------------------|---------------|----|-----------|-----------|-----------|------------|
| 299  | REACTOME-TRAFFICKING_OF_GLR2-CONTAINING-AMPA....  | R-RNO-416993  | 8  | -0.375613 | -0.905719 | 0.578550  | 0.762253   |
| 300  | GOBP-REGULATION_OF_LIPID-METABOLIC_PROCESS        | GO-0019216    | 7  | -0.386184 | -0.908596 | 0.583072  | 0.759201   |
| 301  | GOBP-REGULATION_OF-CARBOHYDRATE-METABOLIC-PROCESS | GO-0006109    | 5  | -0.430286 | -0.910658 | 0.595506  | 0.757263   |
| 302  | GOBP-CELLULAR-AMIDE-METABOLIC_PROCESS             | GO-0043603    | 13 | -0.327409 | -0.910707 | 0.575676  | 0.759000   |
| 303  | GOBP-PURINE-CONTAINING-COMPOUND-METABOLIC-PROCESS | GO-0072521    | 5  | -0.440350 | -0.915421 | 0.572123  | 0.753035   |
| 304  | GOBP-NEGATIVE-REGULATION_OF-CELL-PROJECTION_OR... | GO-0031345    | 5  | -0.445133 | -0.917350 | 0.607085  | 0.751543   |
| 305  | GOBP-INTRACELLULAR-TRANSPORT                      | GO-0046907    | 11 | -0.348456 | -0.918302 | 0.574409  | 0.751681   |
| 306  | GOBP-LYMPHOCYTE-ACTIVATION                        | GO-0046649    | 9  | -0.365535 | -0.918410 | 0.560761  | 0.753320   |
| 307  | GOBP-OSSIFICATION                                 | GO-0001503    | 9  | -0.379966 | -0.920649 | 0.547724  | 0.751289   |
| 308  | GOBP-REGULATION_OF-PEPTIDASE-ACTIVITY             | GO-0052547    | 10 | -0.363103 | -0.923294 | 0.574405  | 0.748487   |
| 309  | GOBP-NEGATIVE-REGULATION_OF-CELL-DEATH            | GO-0060548    | 22 | -0.298039 | -0.924676 | 0.568493  | 0.747958   |
| 310  | GOBP-DEPHOSPHORYLATION                            | GO-0016311    | 7  | -0.405771 | -0.928483 | 0.572755  | 0.742973   |
| 311  | GOBP-CELL-GROWTH                                  | GO-0016049    | 10 | -0.357757 | -0.930615 | 0.564470  | 0.741130   |
| 312  | GOBP-NEURON-APOPTOTIC-PROCESS                     | GO-0051402    | 12 | -0.340113 | -0.932211 | 0.556309  | 0.740223   |
| 313  | GOBP-REGULATION_OF-CELL-DIFFERENTIATION           | GO-0045595    | 36 | -0.270246 | -0.934746 | 0.545918  | 0.737302   |
| 314  | GOBP-POSITIVE-REGULATION_OF-EPITHELIAL-CELL-PR... | GO-0050679    | 7  | -0.409642 | -0.938258 | 0.541667  | 0.733102   |
| 315  | GOBP-REGULATION_OF-ANION-TRANSMEMBRANE-TRANSPORT  | GO-1903959    | 5  | -0.448869 | -0.938745 | 0.582400  | 0.734056   |
| 316  | GOBP-REGULATION_OF-LIPID-LOCALIZATION             | GO-1905952    | 5  | -0.450405 | -0.939823 | 0.551672  | 0.734068   |
| 317  | GOBP-CELL-CELL-SIGNALING-BY-WNT                   | GO-0198738    | 7  | -0.408384 | -0.940435 | 0.542042  | 0.734786   |
| 318  | GOBP-RESPONSE-TO-ENDOGENOUS-STIMULUS              | GO-0009719    | 34 | -0.275295 | -0.940452 | 0.528809  | 0.736565   |
| 319  | GOBP-CELL-MIGRATION                               | GO-0016477    | 22 | -0.295742 | -0.940588 | 0.537333  | 0.738165   |
| 320  | GOBP-MUSCLE-ADAPTATION                            | GO-0043500    | 5  | -0.454840 | -0.941714 | 0.567901  | 0.738049   |
| 321  | GOBP-PROTEIN-LOCALIZATION_TO-SYNAPSE              | GO-0035418    | 5  | -0.451705 | -0.942334 | 0.576531  | 0.738776   |
| 322  | GOBP-GROWTH                                       | GO-0040007    | 14 | -0.329649 | -0.946533 | 0.535211  | 0.732944   |
| 323  | GOBP-PROTEIN-LOCALIZATION_TO-PLASMA-MEMBRANE      | GO-0072659    | 7  | -0.406902 | -0.946864 | 0.557576  | 0.734171   |
| 324  | REACTOME-CELL-CYCLE-MITOTIC                       | R-RNO-69278   | 5  | -0.450702 | -0.949090 | 0.541085  | 0.732129   |
| 325  | GOBP-PROTEIN-LOCALIZATION_TO-POSTSYNAPSE          | GO-0062237    | 5  | -0.451705 | -0.949144 | 0.554662  | 0.733893   |
| 326  | GOBP-SMALL-MOLECULE-METABOLIC-PROCESS             | GO-0042281    | 15 | -0.332213 | -0.949978 | 0.527817  | 0.734314   |
| 327  | GOBP-POSITIVE-REGULATION_OF-TRANSPORT             | GO-0051050    | 26 | -0.291410 | -0.952397 | 0.530105  | 0.731819   |
| 328  | GOBP-PROTEIN-DEPHOSPHORYLATION                    | GO-0006470    | 7  | -0.405771 | -0.952424 | 0.510284  | 0.733648   |
| 329  | GOBP-REGULATION_OF-MUSCLE-ADAPTATION              | GO-0043502    | 5  | -0.454840 | -0.954144 | 0.543131  | 0.732505   |
| 330  | GOBP-REGULATION_OF-WNT-SIGNALING_PATHWAY          | GO-0030111    | 5  | -0.463355 | -0.954902 | 0.559271  | 0.733030   |
| 331  | GOBP-EXTRINSIC-APOPTOTIC-SIGNALING_PATHWAY        | GO-0097191    | 7  | -0.420125 | -0.955076 | 0.524088  | 0.734636   |
| 332  | GOBP-EPITHELIAL-CELL-DIFFERENTIATION              | GO-0030855    | 7  | -0.409356 | -0.955216 | 0.524024  | 0.736281   |
| 333  | GOBP-EMBRYONIC-ORGAN-DEVELOPMENT                  | GO-0048568    | 7  | -0.412491 | -0.955405 | 0.540458  | 0.737877   |
| 334  | GOBP-SECRETION                                    | GO-0046903    | 24 | -0.299420 | -0.959709 | 0.542969  | 0.731860   |
| 335  | GOBP-ENDOCRINE-SYSTEM-DEVELOPMENT                 | GO-0035270    | 6  | -0.435930 | -0.960273 | 0.503852  | 0.732717   |
| 336  | GOBP-RESPONSE-TO-NITROGEN-COMPOUND                | GO-1901698    | 34 | -0.286851 | -0.963127 | 0.526510  | 0.729262   |
| 337  | REACTOME-MAPK-FAMILY-SIGNALING-CASCADES           | R-RNO-5683057 | 12 | -0.349705 | -0.964209 | 0.504348  | 0.729165   |
| 338  | GOBP-POSITIVE-REGULATION_OF_PHOSPHATIDYLINOSIT... | GO-0014068    | 5  | -0.472075 | -0.965485 | 0.638392  | 0.728790   |
| 339  | REACTOME-CELLULAR-RESPONSES_TO-EXTERNAL-STIMULI   | R-RNO-8053897 | 12 | -0.350516 | -0.965697 | 0.510086  | 0.730313   |
| 340  | HALLMARK-EPITHELIAL-MESENCHYMAL-TRANSITION        | M5930         | 5  | -0.464885 | -0.966558 | 0.532925  | 0.730588   |
| 341  | REACTOME_NERVOUS_SYSTEM-DEVELOPMENT               | R-RNO-9675108 | 15 | -0.337498 | -0.968958 | 0.504881  | 0.728042   |

Continuation of Table S14

|     | NAME                                               | ID            | SIZE | ES        | NES       | NOM.p.val | FDR.q.val | FWER.p.val |
|-----|----------------------------------------------------|---------------|------|-----------|-----------|-----------|-----------|------------|
| 342 | REACTOME_NEUTROPHIL_DEGRANULATION                  | R-RNO-6798695 | 6    | -0.440796 | -0.969933 | 0.511905  | 0.728158  | 1.000      |
| 343 | GOBP_SPROUTING_ANGIOGENESIS                        | GO-0002040    | 5    | -0.477801 | -0.971365 | 0.515823  | 0.727496  | 1.000      |
| 344 | GOBP_CELL_ACTIVATION_INVOLVED_IN_IMMUNE_RESPONSE   | GO-0002263    | 6    | -0.440796 | -0.973448 | 0.512938  | 0.725539  | 1.000      |
| 345 | GOBP_NEUROTRANSMITTER_TRANSPORT                    | GO-0006836    | 7    | -0.428602 | -0.976511 | 0.499232  | 0.721888  | 1.000      |
| 346 | GOBP_REGULATION_OF_NEUROTRANSMITTER_LEVELS         | GO-0001505    | 7    | -0.428602 | -0.978564 | 0.496229  | 0.719929  | 1.000      |
| 347 | GOBP_POSITIVE_REGULATION_OF_CYSSTEINE_TYPE_ENDO... | GO-2001056    | 7    | -0.422371 | -0.979975 | 0.494012  | 0.719123  | 1.000      |
| 348 | GOBP_EXCITATORY_CHEMICAL_SYNAPTIC_TRANSMISSION     | GO-0009876    | 5    | -0.472269 | -0.980034 | 0.494506  | 0.720956  | 1.000      |
| 349 | GOBP_FOREBRAIN_DEVELOPMENT                         | GO-0030900    | 9    | -0.398592 | -0.980358 | 0.490674  | 0.722309  | 1.000      |
| 350 | GOBP_POSITIVE_REGULATION_OF_PEPTIDASE_ACTIVITY     | GO-0010952    | 7    | -0.422371 | -0.980670 | 0.495342  | 0.723748  | 1.000      |
| 351 | GOBP_LEUKOCYTE_CELL_CELL_ADHESION                  | GO-0007159    | 6    | -0.443084 | -0.980710 | 0.514821  | 0.725644  | 1.000      |
| 352 | GOBP_POSITIVE_REGULATION_OF_ENDOTHELIAL_CELL_P...  | GO-0001938    | 6    | -0.450245 | -0.983842 | 0.484472  | 0.721678  | 1.000      |
| 353 | GOBP_ADENYLATE_CYCLASE_INHIBITING_G_PROTEIN_CO...  | GO-0007196    | 9    | -0.384718 | -0.983851 | 0.485714  | 0.723635  | 1.000      |
| 354 | REACTOME_SIGNALING_BY_RECEPTOR_TYROSINE_KINASES    | R-RNO-9006934 | 26   | -0.303992 | -0.984868 | 0.469309  | 0.723837  | 1.000      |
| 355 | HALLMARK_UV_RESPONSE_UP                            | M5941         | 5    | -0.482279 | -0.986752 | 0.506536  | 0.722246  | 1.000      |
| 356 | GOBP_NEUROINFLAMMATORY_RESPONSE                    | GO-0150076    | 5    | -0.475460 | -0.987031 | 0.483819  | 0.723670  | 1.000      |
| 357 | GOBP_RESPONSE_TO_INTERLEUKIN_1                     | GO-0070555    | 5    | -0.469547 | -0.987733 | 0.501538  | 0.724349  | 1.000      |
| 358 | GOBP_MYELOID_LEUKOCYTE_MEDIATED_IMMUNITY           | GO-0002444    | 6    | -0.440796 | -0.988536 | 0.489764  | 0.724887  | 1.000      |
| 359 | GOBP_MALE_GAMETE_GENERATION                        | GO-0048232    | 5    | -0.407030 | -0.988875 | 0.489130  | 0.726218  | 1.000      |
| 360 | GOBP_NEGATIVE_REGULATION_OF_HYDROLASE_ACTIVITY     | GO-0051346    | 11   | -0.370726 | -0.990923 | 0.473609  | 0.724406  | 1.000      |
| 361 | GOBP_REGULATION_OF_GROWTH                          | GO-0040008    | 13   | -0.358004 | -0.992030 | 0.473397  | 0.724205  | 1.000      |
| 362 | REACTOME_G_ALPHA_Q_SIGNALING_EVENTS                | R-RNO-416476  | 6    | -0.446040 | -0.994336 | 0.483821  | 0.721409  | 1.000      |
| 363 | GOBP_AMEBOIDAL_TYPE_CELL_MIGRATION                 | GO-0001667    | 11   | -0.371903 | -0.995528 | 0.461201  | 0.721094  | 1.000      |
| 364 | GOBP_REGULATION_OF_CELLULAR_COMPONENT_BIOGENESIS   | GO-0044087    | 10   | -0.387436 | -0.997655 | 0.484050  | 0.719261  | 1.000      |
| 365 | GOBP_REGULATION_OF_MUSCLE_SYSTEM_PROCESS           | GO-0090257    | 8    | -0.413910 | -0.998384 | 0.468702  | 0.719752  | 1.000      |
| 366 | GOBP_POSITIVE_REGULATION_OF_MULTICELLULAR_ORGA...  | GO-0051240    | 32   | -0.295986 | -0.998781 | 0.467949  | 0.721042  | 1.000      |
| 367 | REACTOME_ANTIINFLAMMATORY_RESPONSE_FAVORING...     | R-HSA-9662851 | 5    | -0.478060 | -0.999069 | 0.462366  | 0.722576  | 1.000      |
| 368 | GOBP_PHOSPHATIDYLINOSITOL_3_KINASE_SIGNALING       | GO-0014065    | 7    | -0.438727 | -1.002825 | 0.468606  | 0.717320  | 1.000      |
| 369 | GOBP_CARBOHYDRATE_METABOLIC_PROCESS                | GO-0005975    | 9    | -0.396140 | -1.004090 | 0.466851  | 0.716757  | 1.000      |
| 370 | GOBP_POSITIVE_REGULATION_OF_PROTEOLYSIS            | GO-0045862    | 8    | -0.416338 | -1.004554 | 0.467391  | 0.717921  | 1.000      |
| 371 | GOBP_CELLULAR_RESPONSE_TO_STARVATION               | GO-0009267    | 5    | -0.493329 | -1.004799 | 0.490015  | 0.719528  | 1.000      |
| 372 | GOBP_MULTICELLULAR_ORGANISMAL_HOMEOSTASIS          | GO-0048871    | 12   | -0.376595 | -1.005207 | 0.470109  | 0.720827  | 1.000      |
| 373 | GOBP_FAT_CELL_DIFFERENTIATION                      | GO-0045444    | 9    | -0.404516 | -1.005938 | 0.478582  | 0.721497  | 1.000      |
| 374 | GOBP_REGULATION_OF_PHOSPHATIDYLINOSITOL_3_KINA...  | GO-0014066    | 6    | -0.450967 | -1.006929 | 0.481651  | 0.721637  | 1.000      |
| 375 | REACTOME_EPH_EPHRIN_SIGNALING                      | R-RNO-2682334 | 6    | -0.459712 | -1.008983 | 0.469419  | 0.719632  | 1.000      |
| 376 | REACTOME_DAG_AND_IP3_SIGNALING                     | R-RNO-1489509 | 8    | -0.416769 | -1.010299 | 0.467262  | 0.719058  | 1.000      |
| 377 | GOBP_REGULATION_OF_HYDROLASE_ACTIVITY              | GO-0051336    | 22   | -0.325901 | -1.012859 | 0.443857  | 0.716150  | 1.000      |
| 378 | GOBP_CELLULAR_RESPONSE_TO_PEPTIDE_HORMONE_STIM...  | GO-0071375    | 9    | -0.406157 | -1.015340 | 0.449405  | 0.713284  | 1.000      |
| 379 | GOBP_REGULATION_OF_PROTEIN_MODIFICATION_PROCESS    | GO-0031399    | 29   | -0.306673 | -1.019740 | 0.428756  | 0.706491  | 1.000      |
| 380 | GOBP_HOMEOSTATIC_PROCESS                           | GO-0042592    | 31   | -0.307377 | -1.022093 | 0.444159  | 0.703629  | 1.000      |
| 381 | GOBP_REGULATION_OF_MAPK_CASCADE                    | GO-0043408    | 13   | -0.367007 | -1.024035 | 0.436700  | 0.701903  | 1.000      |
| 382 | GOBP_NEGATIVE_REGULATION_OF_KINASE_ACTIVITY        | GO-0033673    | 5    | -0.495056 | -1.026687 | 0.451078  | 0.698963  | 1.000      |
| 383 | GOBP_CELLULAR_RESPONSE_TO_EXTERNAL_STIMULUS        | GO-0071496    | 10   | -0.400279 | -1.027209 | 0.419214  | 0.699968  | 1.000      |
| 384 | GOBP_NEGATIVE_REGULATION_OF_TRANSFERASE_ACTIVITY   | GO-0051348    | 5    | -0.495056 | -1.027819 | 0.441130  | 0.700780  | 1.000      |



Continuation of Table S14

| NAME | ID                                                | SIZE | ES         | NES       | NOM.p.val | FDR.q.val | FWER.p.val |
|------|---------------------------------------------------|------|------------|-----------|-----------|-----------|------------|
| 385  | GOBP-RESPONSE-TO-UV                               | 5    | -0.503461  | -1.028990 | 0.445652  | 0.700442  | 1.000      |
| 386  | GOBP-RESPONSE-TO-STARVATION                       | 5    | -0.493329  | -1.029565 | 0.437908  | 0.701271  | 1.000      |
| 387  | GOBP-NEGATIVE-REGULATION-OF-PHOSPHORYLATION       | 7    | -0.441962  | -1.029846 | 0.431008  | 0.702814  | 1.000      |
| 388  | GOBP-REGULATION-OF-SECRETION                      | 14   | -0.366493  | -1.034277 | 0.422652  | 0.695971  | 1.000      |
| 389  | GOBP-REGULATION-OF-CYSTEINE-TYPE-ENDOPEPTIDASE... | 9    | -0.413344  | -1.043637 | 0.402077  | 0.678820  | 1.000      |
| 390  | REACTOME-DEVELOPMENTAL-BIOLOGY                    | 23   | -0.328959  | -1.044384 | 0.412550  | 0.679374  | 1.000      |
| 391  | GOBP-NEGATIVE-REGULATION-OF-SIGNALING             | 21   | -0.336964  | -1.048748 | 0.402850  | 0.672597  | 1.000      |
| 392  | GOBP-RAS-PROTEIN-SIGNAL-TRANSDUCTION              | 5    | -0.517023  | -1.055691 | 0.405864  | 0.660812  | 1.000      |
| 393  | GOBP-ORGANONITROGEN-COMPOUND-BIOSYNTHETIC-PROCESS | 13   | -0.382275  | -1.057446 | 0.395184  | 0.659325  | 1.000      |
| 394  | GOBP-POSITIVE-REGULATION-OF-ION-TRANSPORT         | 17   | -0.358662  | -1.057859 | 0.390647  | 0.660433  | 1.000      |
| 395  | GOBP-REGULATION-OF-ANION-TRANSPORT                | 20   | -0.349890  | -1.059001 | 0.380886  | 0.660163  | 1.000      |
| 396  | GOBP-NEGATIVE-REGULATION-OF-LOCOMOTION            | 5    | -0.502628  | -1.060607 | 0.386435  | 0.659060  | 1.000      |
| 397  | GOBP-POSITIVE-REGULATION-OF-MAPK-CASCADE          | 9    | -0.412827  | -1.061161 | 0.384389  | 0.660041  | 1.000      |
| 398  | GOBP-POSITIVE-REGULATION-OF-CELLULAR-COMPONENT... | 9    | -0.423034  | -1.061309 | 0.406755  | 0.661829  | 1.000      |
| 399  | GOBP-ESTABLISHMENT-OF-PROTEIN-LOCALIZATION        | 18   | -0.359840  | -1.061989 | 0.396783  | 0.662564  | 1.000      |
| 400  | GOBP-SIGNAL-RELEASE                               | 14   | -0.377679  | -1.062816 | 0.374302  | 0.662972  | 1.000      |
| 401  | GOBP-ASSOCIATIVE-LEARNING                         | 7    | -0.460200  | -1.064057 | 0.406480  | 0.662524  | 1.000      |
| 402  | REACTOME-RNA-POLYMERASE-II-TRANSCRIPTION          | 20   | -0.351475  | -1.066125 | 0.374507  | 0.660340  | 1.000      |
| 403  | GOBP-CELLULAR-GLUCOSE-HOMEOSTASIS                 | 5    | -0.512427  | -1.068103 | 0.395210  | 0.658267  | 1.000      |
| 404  | GOBP-CELLULAR-RESPONSE-TO-PEPTIDE                 | 13   | -0.382318  | -1.069068 | 0.395862  | 0.658262  | 1.000      |
| 405  | GOBP-CIRCADIAN-REGULATION-OF-GENE-EXPRESSION      | 5    | -0.515160  | -1.069613 | 0.384498  | 0.659201  | 1.000      |
| 406  | REACTOME-INTERLEUKIN-4-AND-INTERLEUKIN-13-SIGN... | 8    | -0.449741  | -1.071826 | 0.398571  | 0.656595  | 1.000      |
| 407  | GOBP-SEXUAL-REPRODUCTION                          | 10   | -0.416722  | -1.072864 | 0.365682  | 0.656649  | 1.000      |
| 408  | GOBP-REGULATION-OF-CELLULAR-COMPONENT-MOVEMENT    | 15   | -0.373971  | -1.073419 | 0.374294  | 0.657593  | 1.000      |
| 409  | GOBP-REGULATION-OF-OSTEOCLAST-DIFFERENTIATION     | 5    | -0.513404  | -1.073717 | 0.382848  | 0.659065  | 1.000      |
| 410  | GOBP-REGULATION-OF-CELL-DEATH                     | 34   | -0.322989  | -1.084159 | 0.343150  | 0.638977  | 1.000      |
| 411  | GOBP-REGULATION-OF-HORMONE-SECRETION              | 8    | -0.446121  | -1.084608 | 0.373494  | 0.640138  | 1.000      |
| 412  | REACTOME-CA-DEPENDENT-EVENTS                      | 8    | -0.440478  | -1.085465 | 0.333333  | 0.640376  | 1.000      |
| 413  | GOBP-ENDOTHELIAL-CELL-MIGRATION                   | 8    | -0.461052  | -1.086193 | 0.372635  | 0.640887  | 1.000      |
| 414  | GOBP-ACTIVATION-OF-IMMUNE-RESPONSE                | 5    | -0.521884  | -1.088918 | 0.354267  | 0.637460  | 1.000      |
| 415  | GOBP-REGULATION-OF-CELL-ACTIVATION                | 8    | -0.459134  | -1.099515 | 0.342342  | 0.617923  | 1.000      |
| 416  | GOBP-RESPONSE-TO-NICOTINE                         | 7    | -0.475707  | -1.103661 | 0.358548  | 0.611465  | 1.000      |
| 417  | GOBP-NEURON-PROJECTION-GUIDANCE                   | 9    | -0.442951  | -1.105987 | 0.343612  | 0.608811  | 1.000      |
| 418  | GOBP-NEGATIVE-REGULATION-OF-CELLULAR-COMPONENT... | 11   | -0.418384  | -1.108764 | 0.338912  | 0.605050  | 1.000      |
| 419  | GOBP-RESPONSE-TO-TEMPERATURE-STIMULUS             | 9    | -0.441108  | -1.112314 | 0.324168  | 0.599623  | 1.000      |
| 420  | GOBP-GAMETE-GENERATION                            | 9    | -0.445456  | -1.112449 | 0.329078  | 0.601329  | 1.000      |
| 421  | GOBP-PROTEIN-KINASE-B-SIGNALING                   | 6    | -0.507879  | -1.113993 | 0.335866  | 0.600006  | 1.000      |
| 422  | GOBP-REGULATION-OF-CELLULAR-CATABOLIC-PROCESS     | 10   | -0.4303129 | -1.114546 | 0.331420  | 0.600801  | 1.000      |
| 423  | GOBP-LEARNING                                     | 13   | -0.400810  | -1.115254 | 0.325352  | 0.601471  | 1.000      |
| 424  | GOBP-BLOOD-VESSEL-ENDOTHELIAL-CELL-MIGRATION      | 7    | -0.461052  | -1.116691 | 0.319749  | 0.600587  | 1.000      |
| 425  | GOBP-CELLULAR-LIPID-METABOLIC-PROCESS             | 8    | -0.481714  | -1.117480 | 0.327300  | 0.601067  | 1.000      |
| 426  | GOBP-RESPONSE-TO-EXTRACELLULAR-STIMULUS           | 13   | -0.413583  | -1.118410 | 0.324750  | 0.601075  | 1.000      |
| 427  | REACTOME-SIGNALING-BY-GPCR                        | 22   | -0.354932  | -1.120183 | 0.302865  | 0.599164  | 1.000      |
|      | R-RNO-372790                                      |      |            |           |           |           |            |

Continuation of Table S14

| NAME | ID                                                 | SIZE          | ES | NES       | NOM.p.val | FDR.q.val | FWER.p.val |
|------|----------------------------------------------------|---------------|----|-----------|-----------|-----------|------------|
| 428  | REACTOME_L1CAM_INTERACTIONS                        | R-RNO-373760  | 5  | -0.546893 | -1.120938 | 0.325914  | 0.599627   |
| 429  | GOBP_POSITIVE_REGULATION_OF_NEURON_DEATH           | GO-1901216    | 5  | -0.541925 | -1.122610 | 0.326923  | 0.598241   |
| 430  | GOBP_RESPONSE_TO_OXYGEN_LEVELS                     | GO-0070482    | 8  | -0.464156 | -1.123583 | 0.311047  | 0.598175   |
| 431  | REACTOME_INTRACELLULAR_SIGNALING_BY_SECOND_MES...  | R-RNO-9006925 | 15 | -0.388713 | -1.123719 | 0.311522  | 0.599949   |
| 432  | GOBP_TRANSMEMBRANE_RECEPTOR_PROTEIN_TYROSINE_K...  | GO-0007169    | 19 | -0.369271 | -1.126988 | 0.315364  | 0.595051   |
| 433  | GOBP_CYTOKINE_MEDIATED_SIGNALING_PATHWAY           | GO-0019221    | 16 | -0.385985 | -1.127792 | 0.297260  | 0.595450   |
| 434  | GOBP_POSITIVE_REGULATION_OF_CELL_DEATH             | GO-0010942    | 19 | -0.372147 | -1.131475 | 0.311634  | 0.589656   |
| 435  | GOBP_NEURON_DEATH                                  | GO-0070997    | 18 | -0.376074 | -1.133688 | 0.301061  | 0.587087   |
| 436  | GOBP_POSITIVE_REGULATION_OF_PROTEIN_SERINE_THR...  | GO-0071902    | 9  | -0.446523 | -1.135837 | 0.298682  | 0.584469   |
| 437  | GOBP_POSITIVE_REGULATION_OF_DEVELOPMENTAL_PROCE... | GO-0051094    | 32 | -0.338772 | -1.139227 | 0.293520  | 0.579437   |
| 438  | GOBP_MORPHOGENESIS_OF_AN_EPITHELIUM                | GO-0002009    | 6  | -0.509450 | -1.139361 | 0.314815  | 0.581188   |
| 439  | GOBP_PROTEIN_AUTOPHOSPHORYLATION                   | GO-0046777    | 5  | -0.553332 | -1.140026 | 0.314425  | 0.581823   |
| 440  | GOBP_MUSCLE_STRUCTURE_DEVELOPMENT                  | GO-0061061    | 16 | -0.396315 | -1.142965 | 0.306849  | 0.577695   |
| 441  | GOBP_NEGATIVE_REGULATION_OF_PROTEOLYSIS            | GO-0045861    | 8  | -0.469777 | -1.145393 | 0.288084  | 0.574484   |
| 442  | GOBP_REGULATION_OF_CELL_CELL_ADHESION              | GO-0022407    | 9  | -0.459300 | -1.145529 | 0.292467  | 0.570294   |
| 443  | REACTOME_G_ALPHA_I_SIGNALING_EVENTS                | R-RNO-418594  | 18 | -0.379797 | -1.148312 | 0.280822  | 0.572578   |
| 444  | GOBP_NEGATIVE_REGULATION_OF_CELL_CYCLE             | GO-0045786    | 5  | -0.554217 | -1.148394 | 0.297078  | 0.574417   |
| 445  | GOBP_CELLULAR_RESPONSE_TO_KETONE                   | GO-1901655    | 5  | -0.552973 | -1.149409 | 0.293461  | 0.574417   |
| 446  | GOBP_POSITIVE_REGULATION_OF_CELL_DIFFERENTIATION   | GO-0045597    | 27 | -0.344946 | -1.150488 | 0.284967  | 0.574196   |
| 447  | GOBP_REGULATION_OF_PROTEIN_STABILITY               | GO-0031647    | 5  | -0.566259 | -1.150598 | 0.293564  | 0.576102   |
| 448  | GOBP_TISSUE_MIGRATION                              | GO-0090130    | 9  | -0.457598 | -1.154792 | 0.279104  | 0.569072   |
| 449  | GOBP_CELLULAR_RESPONSE_TO_ALCOHOL                  | GO-0097306    | 5  | -0.557662 | -1.154854 | 0.278135  | 0.571038   |
| 450  | REACTOME_ESTROGEN_DEPENDENT_NUCLEAR_EVENTS_DOW...  | R-RNO-9634638 | 5  | -0.557976 | -1.155832 | 0.285943  | 0.571301   |
| 451  | GOBP_RESPIRATORY_SYSTEM_DEVELOPMENT                | GO-0060541    | 6  | -0.521203 | -1.158269 | 0.283742  | 0.568111   |
| 452  | GOBP_REGULATION_OF_CELLULAR_AMIDE_METABOLIC_PR...  | GO-0034248    | 9  | -0.467688 | -1.159762 | 0.282421  | 0.566966   |
| 453  | GOBP_EPIDERMIS_DEVELOPMENT                         | GO-0008544    | 5  | -0.561536 | -1.159794 | 0.278207  | 0.569021   |
| 454  | GOBP_EPHRIN_RECEPTOR_SIGNALING_PATHWAY             | GO-0048013    | 5  | -0.561362 | -1.164966 | 0.277512  | 0.560548   |
| 455  | GOBP_POSITIVE_REGULATION_OF_CELL_CELL_ADHESION     | GO-0022409    | 5  | -0.570060 | -1.168124 | 0.293185  | 0.555695   |
| 456  | GOBP_REGULATION_OF_PEPTIDE_TRANSPORT               | GO-0090087    | 10 | -0.442469 | -1.169897 | 0.278499  | 0.553887   |
| 457  | GOBP_ANATOMICAL_STRUCTURE_FORMATION_INVOLVED_I...  | GO-0048646    | 20 | -0.385197 | -1.171160 | 0.259591  | 0.553202   |
| 458  | GOBP_IMPORT_INTO_CELL                              | GO-0098657    | 6  | -0.531559 | -1.174518 | 0.275969  | 0.548020   |
| 459  | GOBP_REGULATION_OF_BINDING                         | GO-0051098    | 11 | -0.452476 | -1.174642 | 0.265335  | 0.549847   |
| 460  | GOBP_HOMEOSTASIS_OF_NUMBER_OF_CELLS                | GO-0048872    | 5  | -0.554608 | -1.176729 | 0.266254  | 0.547597   |
| 461  | GOBP_INTRACELLULAR_RECEPTOR_SIGNALING_PATHWAY      | GO-0030522    | 5  | -0.562297 | -1.177173 | 0.248788  | 0.548710   |
| 462  | GOBP_REGULATION_OF_CELL_ADHESION                   | GO-0030155    | 13 | -0.427447 | -1.177257 | 0.264828  | 0.550667   |
| 463  | GOBP_MEMBRANE_ORGANIZATION                         | GO-0061024    | 12 | -0.406104 | -1.177556 | 0.267525  | 0.551749   |
| 464  | GOBP_SECOND_MESSENGER_MEDIATED_SIGNALING           | GO-0019932    | 16 | -0.402811 | -1.179236 | 0.267983  | 0.550574   |
| 465  | GOBP_GLAND_DEVELOPMENT                             | GO-0048732    | 7  | -0.509580 | -1.179953 | 0.264122  | 0.551194   |
| 466  | GOBP_POSITIVE_REGULATION_OF_ORGANELLE_ORGANIZA...  | GO-0010638    | 10 | -0.455895 | -1.180425 | 0.263533  | 0.552337   |
| 467  | GOBP_REGULATION_OF_FAT_CELL_DIFFERENTIATION        | GO-0045598    | 6  | -0.542297 | -1.180577 | 0.257576  | 0.554212   |
| 468  | REACTOME_G_PROTEIN_MEDIATED_EVENTS                 | R-RNO-112040  | 9  | -0.468667 | -1.181526 | 0.248889  | 0.554314   |
| 469  | GOBP_LOCOMOTION                                    | GO-0040011    | 31 | -0.354203 | -1.182814 | 0.253827  | 0.553695   |
| 470  | GOBP_LIPID_METABOLIC_PROCESS                       | GO-0006629    | 10 | -0.453245 | -1.183579 | 0.249288  | 0.554258   |

Continuation of Table S14

|     | NAME                                              | ID            | SIZE | ES        | NES       | NOM.p.val | FDR.q.val | FWER.p.val |
|-----|---------------------------------------------------|---------------|------|-----------|-----------|-----------|-----------|------------|
| 471 | GOBP-MEMBRANE-PROTEIN-PROTEOLYSIS                 | GO-0033619    | 6    | -0.534829 | -1.183702 | 0.272586  | 0.556206  | 1.000      |
| 472 | GOBP-POSITIVE-REGULATION-OF-GENE-EXPRESSION       | GO-0010628    | 16   | -0.404110 | -1.184729 | 0.248032  | 0.556217  | 1.000      |
| 473 | GOBP-SMALL-GTPASE-MEDIATED-SIGNAL-TRANSDUCTION    | GO-0007264    | 8    | -0.493019 | -1.185563 | 0.261516  | 0.556509  | 1.000      |
| 474 | GOBP-POSITIVE-REGULATION-OF-LEUKOCYTE-CELL-CEL... | GO-1903039    | 5    | -0.570060 | -1.185918 | 0.230887  | 0.558019  | 1.000      |
| 475 | GOBP-CELLULAR-RESPONSE-TO-EXTRACELLULAR-STIMULUS  | GO-0031668    | 8    | -0.497305 | -1.186036 | 0.279001  | 0.560033  | 1.000      |
| 476 | GOBP-OSTEOBLAST-DIFFERENTIATION                   | GO-0001649    | 5    | -0.566061 | -1.190067 | 0.242376  | 0.553522  | 1.000      |
| 477 | GOBP-REGULATION-OF-CIRCADIAN-RHYTHM               | GO-0042752    | 7    | -0.514972 | -1.192325 | 0.260212  | 0.551068  | 1.000      |
| 478 | REACTOME-CIRCADIAN-CLOCK                          | R-HSA-400253  | 5    | -0.573930 | -1.195935 | 0.244019  | 0.545312  | 1.000      |
| 479 | GOBP-REGULATION-OF-MULTICELLULAR-ORGANISMAL-DE... | GO-2000026    | 31   | -0.362303 | -1.205084 | 0.236709  | 0.527647  | 1.000      |
| 480 | HALLMARK-APOPTOSIS                                | M5902         | 6    | -0.550328 | -1.209423 | 0.215873  | 0.520616  | 1.000      |
| 481 | GOBP-BIOLOGICAL-ADHESION                          | GO-0022610    | 19   | -0.394708 | -1.210534 | 0.226519  | 0.520402  | 1.000      |
| 482 | GOBP-LEUKOCYTE-MIGRATION                          | GO-0050900    | 6    | -0.544886 | -1.213434 | 0.214391  | 0.516189  | 1.000      |
| 483 | REACTOME-CELLULAR-SENESCENCE                      | GO-2559583    | 6    | -0.559810 | -1.218086 | 0.222910  | 0.508285  | 1.000      |
| 484 | REACTOME-EXTRA-NUCLEAR-ESTROGEN-SIGNALING         | R-RNO-9009391 | 7    | -0.528607 | -1.220095 | 0.223077  | 0.506211  | 1.000      |
| 485 | GOBP-CYTOSKELETON-ORGANIZATION                    | GO-0007010    | 11   | -0.474431 | -1.220989 | 0.231760  | 0.506650  | 1.000      |
| 486 | REACTOME-PTEN-REGULATION                          | R-RNO-6807070 | 5    | -0.594614 | -1.221061 | 0.226415  | 0.508713  | 1.000      |
| 487 | REACTOME-SENESCENCE-ASSOCIATED-SECRETORY-PHENO... | R-RNO-2559582 | 6    | -0.559810 | -1.227801 | 0.200000  | 0.496446  | 1.000      |
| 488 | GOBP-RESPONSE-TO-ABIOTIC-STIMULUS                 | GO-0009628    | 27   | -0.381607 | -1.230990 | 0.198925  | 0.491983  | 1.000      |
| 489 | GOBP-LEUKOCYTE-MEDIATED-IMMUNITY                  | GO-0002443    | 7    | -0.526107 | -1.233912 | 0.214176  | 0.488042  | 1.000      |
| 490 | GOBP-OSTEOCLAST-DIFFERENTIATION                   | GO-0030316    | 6    | -0.569164 | -1.234265 | 0.206731  | 0.489500  | 1.000      |
| 491 | GOBP-POSTTRANSCRIPTIONAL-REGULATION-OF-GENE-EX... | GO-0010608    | 8    | -0.509474 | -1.234846 | 0.217066  | 0.490295  | 1.000      |
| 492 | GOBP-NEGATIVE-REGULATION-OF-CATABOLIC-PROCESS     | GO-0009895    | 8    | -0.509810 | -1.237152 | 0.202050  | 0.487432  | 1.000      |
| 493 | GOBP-RESPONSE-TO-MECHANICAL-STIMULUS              | GO-0009612    | 6    | -0.559612 | -1.238363 | 0.210687  | 0.487117  | 1.000      |
| 494 | GOBP-REGULATION-OF-LIPID-BIOSYNTHETIC-PROCESS     | GO-0046890    | 6    | -0.571877 | -1.238642 | 0.216718  | 0.488716  | 1.000      |
| 495 | GOBP-POSITIVE-REGULATION-OF-CELL-ADHESION         | GO-0045785    | 7    | -0.539602 | -1.239507 | 0.209199  | 0.489233  | 1.000      |
| 496 | GOBP-REGULATION-OF-RESPONSE-TO-STRESS             | GO-0080134    | 19   | -0.410329 | -1.239849 | 0.202514  | 0.490625  | 1.000      |
| 497 | GOBP-INTRINSIC-APOPTOTIC-SIGNALING-PATHWAY        | GO-0097193    | 5    | -0.595652 | -1.240722 | 0.183359  | 0.490984  | 1.000      |
| 498 | REACTOME-INTEGRATION-OF-ENERGY-METABOLISM         | R-RNO-163685  | 5    | -0.612785 | -1.243963 | 0.197390  | 0.485938  | 1.000      |
| 499 | GOBP-CELL-JUNCTION-ASSEMBLY                       | GO-0034329    | 8    | -0.519218 | -1.244396 | 0.200295  | 0.487276  | 1.000      |
| 500 | GOBP-NEGATIVE-REGULATION-OF-PROTEIN-CATABOLIC...  | GO-0042177    | 5    | -0.603428 | -1.245600 | 0.193199  | 0.486963  | 1.000      |
| 501 | GOBP-REGULATION-OF-PROTEIN-SERINE-THREONINE-KI... | GO-0071900    | 12   | -0.461404 | -1.247432 | 0.204769  | 0.485419  | 1.000      |
| 502 | GOBP-RESPONSE-TO-OXYGEN-CONTAINING-COMPOUND       | GO-1901700    | 39   | -0.359915 | -1.248847 | 0.188045  | 0.484644  | 1.000      |
| 503 | GOBP-DEVELOPMENTAL-PROCESS-INVOLVED-IN-REPRODU... | GO-0003006    | 11   | -0.482261 | -1.249592 | 0.202899  | 0.485306  | 1.000      |
| 504 | REACTOME-FC-EPSILON-RECEPTOR-FCER1-SIGNALING      | R-RNO-2454202 | 7    | -0.537202 | -1.250647 | 0.191063  | 0.485288  | 1.000      |
| 505 | GOBP-FC-EPSILON-RECEPTOR-SIGNALING-PATHWAY        | GO-0038095    | 7    | -0.537202 | -1.250977 | 0.189024  | 0.486745  | 1.000      |
| 506 | GOBP-PROTEIN-LOCALIZATION-TO-ORGANELLE            | GO-0033365    | 9    | -0.510995 | -1.251775 | 0.183381  | 0.487145  | 1.000      |
| 507 | GOBP-REGULATION-OF-PROTEOLYSIS                    | GO-0030162    | 12   | -0.455525 | -1.253173 | 0.195225  | 0.486534  | 1.000      |
| 508 | GOBP-MAINTENANCE-OF-LOCATION                      | GO-0051235    | 7    | -0.540365 | -1.253625 | 0.207143  | 0.487841  | 1.000      |
| 509 | GOBP-RESPONSE-TO-BIOTIC-STIMULUS                  | GO-0009607    | 17   | -0.426189 | -1.255092 | 0.199158  | 0.486850  | 1.000      |
| 510 | GOBP-PEPTIDYL-LYSINE-MODIFICATION                 | GO-0018205    | 5    | -0.601123 | -1.255610 | 0.186520  | 0.488046  | 1.000      |
| 511 | GOBP-REPRODUCTION                                 | GO-0000003    | 18   | -0.422724 | -1.258602 | 0.163265  | 0.483948  | 1.000      |
| 512 | GOBP-ERK1-AND-ERK2-CASCADE                        | GO-0070371    | 5    | -0.602525 | -1.259114 | 0.175115  | 0.485174  | 1.000      |
| 513 | GOBP-REGULATION-OF-CELL-CYCLE-PROCESS             | GO-0010564    | 5    | -0.605539 | -1.261307 | 0.173313  | 0.482861  | 1.000      |

Continuation of Table S14

| NAME                                                  | ID            | SIZE | ES        | NES       | NOM.p.val | FDR.q.val | FWER.p.val |
|-------------------------------------------------------|---------------|------|-----------|-----------|-----------|-----------|------------|
| 514 GOBP-REGULATION-OF-ORGANELLE-ORGANIZATION         | GO-0033043    | 14   | -0.440816 | -1.261566 | 0.195122  | 0.484709  | 1.000      |
| 515 GOBP-LIPID-BIOSYNTHETIC-PROCESS                   | GO-0008610    | 6    | -0.571877 | -1.263558 | 0.176563  | 0.482898  | 1.000      |
| 516 GOBP-NEGATIVE-REGULATION-OF-RESPONSE-TO-EXTERN... | GO-0032102    | 5    | -0.610088 | -1.264972 | 0.181126  | 0.482005  | 1.000      |
| 517 GOBP-REGULATION-OF-DNA-BINDING-TRANSCRIPTION.F... | GO-0051090    | 16   | -0.432672 | -1.269080 | 0.176144  | 0.474919  | 1.000      |
| 518 GOBP-PROTEIN-LOCALIZATION-TO-MEMBRANE             | GO-0072657    | 14   | -0.454465 | -1.270282 | 0.178121  | 0.474634  | 1.000      |
| 519 GOBP-CELLULAR-COMPONENT-DISASSEMBLY               | GO-0022411    | 6    | -0.582656 | -1.275201 | 0.156105  | 0.465813  | 1.000      |
| 520 GOBP-ESTABLISHMENT-OF-PROTEIN-LOCALIZATION-TO...  | GO-0072594    | 6    | -0.572273 | -1.278013 | 0.165635  | 0.461857  | 1.000      |
| 521 GOBP-MULTICELLULAR-ORGANISM-REPRODUCTION          | GO-0032504    | 12   | -0.473916 | -1.280665 | 0.169188  | 0.458971  | 1.000      |
| 522 GOBP-REGULATION-OF-CELLULAR-RESPONSE-TO-STRESS    | GO-0080135    | 9    | -0.510234 | -1.281282 | 0.176558  | 0.460050  | 1.000      |
| 523 GOBP-RESPONSE-TO-INSULIN                          | GO-0032868    | 5    | -0.621597 | -1.282353 | 0.159420  | 0.460180  | 1.000      |
| 524 GOBP-ANATOMICAL-STRUCTURE-HOMEOSTASIS             | GO-0060249    | 7    | -0.552246 | -1.282803 | 0.174528  | 0.461561  | 1.000      |
| 525 REACTOME-G-ALPHA-Z-SIGNALING-EVENTS               | R-RNO-418597  | 5    | -0.623425 | -1.284219 | 0.172414  | 0.461037  | 1.000      |
| 526 GOBP-POSITIVE-REGULATION-OF-CYTOKINE-PRODUCTION   | GO-0001819    | 7    | -0.556004 | -1.285835 | 0.175150  | 0.459874  | 1.000      |
| 527 GOBP-POSITIVE-REGULATION-OF-LOCOMOTION            | GO-0040017    | 11   | -0.478343 | -1.286289 | 0.173104  | 0.461199  | 1.000      |
| 528 GOBP-PROTEIN-LOCALIZATION-TO-CELL-PERIPHERY       | GO-1990778    | 12   | -0.475630 | -1.286669 | 0.171388  | 0.462808  | 1.000      |
| 529 GOBP-MONONUCLEAR-CELL-DIFFERENTIATION             | GO-1903131    | 7    | -0.553067 | -1.288037 | 0.182371  | 0.462345  | 1.000      |
| 530 GOBP-APOPTOTIC-PROCESS                            | GO-0006915    | 35   | -0.381447 | -1.289892 | 0.153186  | 0.460708  | 1.000      |
| 531 GOBP-ACTIN-FILAMENT-BASED-PROCESS                 | GO-0030029    | 7    | -0.549885 | -1.290410 | 0.159940  | 0.462110  | 1.000      |
| 532 GOBP-CELLULAR-RESPONSE-TO-HORMONE-STIMULUS        | GO-0032870    | 11   | -0.489732 | -1.292907 | 0.165975  | 0.458502  | 1.000      |
| 533 GOBP-HEAD-DEVELOPMENT                             | GO-0060322    | 22   | -0.414989 | -1.294014 | 0.167726  | 0.458470  | 1.000      |
| 534 GOBP-CELL-CELL-ADHESION                           | GO-0098609    | 14   | -0.456416 | -1.297615 | 0.170765  | 0.453007  | 1.000      |
| 535 REACTOME-MEMBRANE-TRAFFICKING                     | R-RNO-199991  | 5    | -0.627173 | -1.300739 | 0.158654  | 0.448624  | 1.000      |
| 536 GOBP-AGING                                        | GO-0007568    | 13   | -0.469088 | -1.303006 | 0.171788  | 0.446118  | 1.000      |
| 537 GOBP-NEGATIVE-REGULATION-OF-CELL-POPULATION-PR... | GO-0008285    | 9    | -0.522323 | -1.303332 | 0.151825  | 0.447952  | 1.000      |
| 538 GOBP-TISSUE-MORPHOGENESIS                         | GO-0048729    | 7    | -0.550675 | -1.304957 | 0.156923  | 0.447002  | 1.000      |
| 539 GOBP-AMYLOID-BETA-METABOLIC-PROCESS               | GO-0050435    | 5    | -0.633039 | -1.306881 | 0.125786  | 0.444996  | 1.000      |
| 540 GOBP-REGULATION-OF-PROTEIN-LOCALIZATION-TO-CEL... | GO-1904375    | 6    | -0.587960 | -1.306930 | 0.145062  | 0.447421  | 1.000      |
| 541 GOBP-POSITIVE-REGULATION-OF-ESTABLISHMENT-OF-P... | GO-1904951    | 5    | -0.631771 | -1.312334 | 0.147673  | 0.437844  | 1.000      |
| 542 GOBP-CELLULAR-MACROMOLECULE-LOCALIZATION          | GO-0070727    | 21   | -0.425897 | -1.312821 | 0.134349  | 0.439223  | 1.000      |
| 543 GOBP-POSITIVE-REGULATION-OF-CELL-POPULATION-PR... | GO-0008284    | 21   | -0.421622 | -1.312956 | 0.138441  | 0.441427  | 1.000      |
| 544 GOBP-PROTEOLYSIS                                  | GO-0006508    | 17   | -0.450445 | -1.312972 | 0.128065  | 0.443932  | 1.000      |
| 545 GOBP-NEGATIVE-REGULATION-OF-INTRACELLULAR-SIGN... | GO-1902532    | 7    | -0.559033 | -1.312992 | 0.139466  | 0.446414  | 1.000      |
| 546 GOBP-CELL-CELL-JUNCTION-ASSEMBLY                  | GO-0007043    | 5    | -0.628631 | -1.314178 | 0.127055  | 0.446192  | 1.000      |
| 547 REACTOME-INFECTIOUS-DISEASE                       | R-HSA-5663205 | 13   | -0.477951 | -1.315433 | 0.144044  | 0.445762  | 1.000      |
| 548 GOBP-POSITIVE-REGULATION-OF-SMALL-MOLECULE-MET... | GO-0062013    | 5    | -0.635402 | -1.318008 | 0.122417  | 0.442287  | 1.000      |
| 549 REACTOME-NGF-STIMULATED-TRANSCRIPTION             | R-RNO-9031628 | 9    | -0.524113 | -1.322209 | 0.145115  | 0.435186  | 1.000      |
| 550 GOBP-PROTEIN-LOCALIZATION-TO-CELL-JUNCTION        | GO-1902414    | 6    | -0.609480 | -1.322591 | 0.144216  | 0.436764  | 1.000      |
| 551 GOBP-AMYLOID-PRECURSOR-PROTEIN-METABOLIC-PROCESS  | GO-0042982    | 5    | -0.630309 | -1.324007 | 0.124595  | 0.436316  | 1.000      |
| 552 REACTOME-VESICLE-MEDIATED-TRANSPORT               | R-RNO-5653656 | 5    | -0.627173 | -1.324319 | 0.137600  | 0.438319  | 1.000      |
| 553 GOBP-AMYLOID-PRECURSOR-PROTEIN-CATABOLIC-PROCESS  | GO-0042987    | 5    | -0.630309 | -1.326422 | 0.127451  | 0.435923  | 1.000      |
| 554 REACTOME-CELL-CYCLE                               | R-RNO-1640170 | 6    | -0.590729 | -1.328338 | 0.135542  | 0.434269  | 1.000      |
| 555 REACTOME-OPIOID-SIGNALING                         | R-RNO-111885  | 12   | -0.489571 | -1.333008 | 0.122963  | 0.426280  | 1.000      |
| 556 GOBP-REGULATION-OF-RESPONSE-TO-EXTERNAL-STIMULUS  | GO-0032101    | 15   | -0.469180 | -1.335375 | 0.122253  | 0.423528  | 1.000      |

Continuation of Table S14

| NAME                                                  | ID            | SIZE | ES        | NES       | NOM.p.val | FDR.q.val | FWER.p.val |
|-------------------------------------------------------|---------------|------|-----------|-----------|-----------|-----------|------------|
| 557 REACTOME-CYTOKINE.SIGNALING.IN.IMMUNE.SYSTEM      | R-RNO-1280215 | 21   | -0.438737 | -1.336157 | 0.136126  | 0.424438  | 1.000      |
| 558 HALLMARK-HYPOXIA                                  | M5891         | 5    | -0.640660 | -1.341054 | 0.124807  | 0.416019  | 1.000      |
| 559 GOBP-REGULATION-OF-PROTEIN.LOCALIZATION           | GO-0032880    | 18   | -0.439813 | -1.341594 | 0.120805  | 0.417429  | 1.000      |
| 560 GOBP-POSITIVE.REGULATION-OF-CELLULAR-PROTEIN.L... | GO-1903829    | 7    | -0.575381 | -1.341643 | 0.125000  | 0.419883  | 1.000      |
| 561 GOBP-EPITHELIIUM.DEVELOPMENT                      | GO-0060429    | 15   | -0.466605 | -1.344429 | 0.125176  | 0.416549  | 1.000      |
| 562 GOBP-INTRACELLULAR-PROTEIN-TRANSPORT              | GO-0006886    | 9    | -0.534929 | -1.346239 | 0.120715  | 0.414884  | 1.000      |
| 563 HALLMARK-TNFA.SIGNALING.VIA-NFKB                  | M5890         | 14   | -0.475107 | -1.353748 | 0.116901  | 0.400574  | 1.000      |
| 564 REACTOME-INTERLEUKIN-17-SIGNALING                 | R-RNO-448424  | 6    | -0.617888 | -1.362088 | 0.119335  | 0.385255  | 1.000      |
| 565 GOBP-RESPONSE-TO-HORMONE                          | GO-0009725    | 20   | -0.436937 | -1.364745 | 0.123835  | 0.381856  | 1.000      |
| 566 GOBP-POSITIVE.REGULATION-OF-EPITHELIAL-CELL.MI... | GO-0010634    | 5    | -0.661651 | -1.365557 | 0.092332  | 0.382734  | 1.000      |
| 567 GOBP-ENDOMEMBRANE-SYSTEM-ORGANIZATION             | GO-0010256    | 6    | -0.615238 | -1.368580 | 0.109940  | 0.378576  | 1.000      |
| 568 GOBP-REGULATION-OF-GTPASE-ACTIVITY                | GO-0043087    | 5    | -0.656120 | -1.372505 | 0.106725  | 0.372952  | 1.000      |
| 569 GOBP-REGULATION-OF-CATABOLIC-PROCESS              | GO-0009894    | 13   | -0.494918 | -1.373650 | 0.105644  | 0.372994  | 1.000      |
| 570 GOBP-NEGATIVE.REGULATION-OF-NEUROUS.SYSTEM.DEV... | GO-0051961    | 5    | -0.663511 | -1.373919 | 0.075710  | 0.374979  | 1.000      |
| 571 GOBP-RESPONSE-TO-INORGANIC-SUBSTANCE              | GO-0010035    | 19   | -0.457066 | -1.373941 | 0.116248  | 0.377476  | 1.000      |
| 572 GOBP-NEGATIVE.REGULATION-OF-MULTICELLULAR-ORGA... | GO-0051241    | 15   | -0.473331 | -1.374968 | 0.106534  | 0.377747  | 1.000      |
| 573 GOBP-CELL-CYCLE-PROCESS                           | GO-0022402    | 11   | -0.522879 | -1.380349 | 0.101156  | 0.368932  | 1.000      |
| 574 GOBP-POSITIVE.REGULATION-OF-HEMOPOIESIS           | GO-1903708    | 7    | -0.604938 | -1.382346 | 0.103048  | 0.367235  | 1.000      |
| 575 GOBP-CELLULAR-RESPONSE-TO-ORGANIC-CYCLIC-COMPOUND | GO-0071407    | 13   | -0.495187 | -1.383210 | 0.103550  | 0.367858  | 1.000      |
| 576 REACTOME-TRANSCRIPTIONAL.REGULATION-BY-TP53       | R-RNO-3700989 | 6    | -0.630828 | -1.385165 | 0.087500  | 0.366304  | 1.000      |
| 577 REACTOME-SIGNALING-BY-NUCLEAR-RECEPTORS           | R-RNO-9006931 | 8    | -0.578316 | -1.386378 | 0.102453  | 0.366225  | 1.000      |
| 578 GOBP-CELLULAR-MACROMOLECULE-CATABOLIC-PROCESS     | GO-0044265    | 6    | -0.630397 | -1.388491 | 0.089292  | 0.363972  | 1.000      |
| 579 GOBP-RESPONSE-TO-ACID-CHEMICAL                    | GO-0001101    | 6    | -0.630962 | -1.389425 | 0.085139  | 0.364565  | 1.000      |
| 580 GOBP-RESPONSE-TO-CYTOKINE                         | GO-0034097    | 23   | -0.444123 | -1.391782 | 0.095872  | 0.361911  | 1.000      |
| 581 GOBP-NEGATIVE.REGULATION-OF-PROTEIN-METABOLIC-... | GO-0051248    | 20   | -0.460963 | -1.399774 | 0.083799  | 0.348249  | 1.000      |
| 582 GOBP-NEGATIVE.REGULATION-OF-TRANSMEMBRANE-TRAN... | GO-0034763    | 6    | -0.632308 | -1.399997 | 0.088550  | 0.350289  | 1.000      |
| 583 GOBP-CELL-CELL-JUNCTION-ORGANIZATION              | GO-0045216    | 6    | -0.629966 | -1.400035 | 0.094595  | 0.352784  | 1.000      |
| 584 GOBP-NEGATIVE.REGULATION-OF-MOLECULAR-FUNCTION    | GO-0044092    | 24   | -0.445276 | -1.400230 | 0.084918  | 0.354855  | 1.000      |
| 585 GOBP-NEGATIVE.REGULATION-OF-CELL-DEVELOPMENT      | GO-0010721    | 6    | -0.632957 | -1.400496 | 0.089202  | 0.357000  | 1.000      |
| 586 GOBP-REPRODUCTIVE-SYSTEM-DEVELOPMENT              | GO-0061458    | 6    | -0.641572 | -1.401005 | 0.082792  | 0.358474  | 1.000      |
| 587 GOBP-RESPONSE-TO-TUMOR-NECROSIS-FACTOR            | GO-0034612    | 7    | -0.607462 | -1.403199 | 0.094815  | 0.356791  | 1.000      |
| 588 REACTOME-NUCLEAR-EVENTS-KINASE-AND-TRANSCRIPTI... | R-RNO-198725  | 11   | -0.533065 | -1.403523 | 0.093484  | 0.358863  | 1.000      |
| 589 GOBP-NEGATIVE.REGULATION-OF-PHOSPHORUS-METABOL... | GO-0010563    | 9    | -0.560604 | -1.406121 | 0.089419  | 0.355892  | 1.000      |
| 590 REACTOME-ESR-MEDIATED-SIGNALING                   | R-RNO-8939211 | 8    | -0.578316 | -1.406476 | 0.083458  | 0.357889  | 1.000      |
| 591 GOBP-REGULATION-OF-PROTEIN-LOCALIZATION-TO-MEM... | GO-1905475    | 7    | -0.604870 | -1.406846 | 0.080871  | 0.359883  | 1.000      |
| 592 GOBP-RESPONSE-TO-LIGHT-STIMULUS                   | GO-0009416    | 11   | -0.523387 | -1.410242 | 0.095729  | 0.355214  | 1.000      |
| 593 GOBP-REGULATION-OF-VASCULATURE-DEVELOPMENT        | GO-1901342    | 5    | -0.686454 | -1.413411 | 0.073600  | 0.351240  | 1.000      |
| 594 REACTOME-SIGNALING-BY-WNT                         | R-RNO-195721  | 7    | -0.611373 | -1.414512 | 0.085139  | 0.351682  | 1.000      |
| 595 REACTOME-LEISHMANIA-INFECTION                     | R-HSA-9658195 | 10   | -0.539120 | -1.415090 | 0.091298  | 0.353179  | 1.000      |
| 596 GOBP-NEGATIVE.REGULATION-OF-TRANSCRIPTION-BY-R... | GO-0000122    | 10   | -0.545247 | -1.417694 | 0.087770  | 0.350286  | 1.000      |
| 597 GOBP-RESPONSE-TO-KETONE                           | GO-1901654    | 7    | -0.621300 | -1.418721 | 0.102832  | 0.350822  | 1.000      |
| 598 GOBP-POSITIVE.REGULATION-OF-IMMUNE-RESPONSE       | GO-0050778    | 9    | -0.553220 | -1.419267 | 0.093220  | 0.352513  | 1.000      |
| 599 GOBP-RESPONSE-TO-ORGANIC-CYCLIC-COMPOUND          | GO-0014070    | 20   | -0.460948 | -1.423189 | 0.074728  | 0.347424  | 1.000      |

Continuation of Table S14

| NAME                                                  | ID            | SIZE | ES        | NES       | NOM.p.val | FDR.q.val | FWER.p.val |
|-------------------------------------------------------|---------------|------|-----------|-----------|-----------|-----------|------------|
| 600 GOBP-CENTRAL-NERVOUS-SYSTEM-DEVELOPMENT           | GO-0007417    | 26   | -0.446402 | -1.423451 | 0.081117  | 0.349762  | 1.000      |
| 601 REACTOME-PLATELET-ACTIVATION-SIGNALING-AND-AGG... | R-HSA-76002   | 7    | -0.601663 | -1.434621 | 0.082831  | 0.329465  | 1.000      |
| 602 GOBP-CELL-ACTIVATION                              | GO-0001775    | 21   | -0.469663 | -1.436794 | 0.074667  | 0.327892  | 1.000      |
| 603 GOBP-ENDOTHELIAL-CELL-PROLIFERATION               | GO-0001935    | 8    | -0.579062 | -1.437413 | 0.077160  | 0.329297  | 1.000      |
| 604 GOBP-TISSUE-HOMEOSTASIS                           | GO-0001894    | 5    | -0.695341 | -1.442242 | 0.068182  | 0.322665  | 1.000      |
| 605 GOBP-MULTI-ORGANISM-PROCESS                       | GO-0051704    | 16   | -0.495280 | -1.443253 | 0.080711  | 0.323192  | 1.000      |
| 606 GOBP-IMMUNE-RESPONSE-REGULATING-SIGNALING-PATHWAY | GO-000276     | 8    | -0.608852 | -1.445589 | 0.076358  | 0.321128  | 1.000      |
| 607 REACTOME-ADAPTIVE-IMMUNE-SYSTEM                   | R-RNO-1280218 | 9    | -0.570356 | -1.455088 | 0.073906  | 0.304840  | 1.000      |
| 608 GOBP-VASCULATURE-DEVELOPMENT                      | GO-0001944    | 17   | -0.499892 | -1.458490 | 0.065826  | 0.301290  | 1.000      |
| 609 GOBP-GLUCOSE-METABOLIC-PROCESS                    | GO-0006006    | 6    | -0.673422 | -1.466457 | 0.053042  | 0.288099  | 1.000      |
| 610 GOBP-NEGATIVE-REGULATION-OF-GENE-EXPRESSION       | GO-0010629    | 12   | -0.545970 | -1.467629 | 0.065248  | 0.288487  | 1.000      |
| 611 GOBP-CELL-POPULATION-PROLIFERATION                | GO-0008283    | 31   | -0.439369 | -1.469941 | 0.051572  | 0.286800  | 1.000      |
| 612 GOBP-FC-RECEPTOR-SIGNALING-PATHWAY                | GO-0038093    | 8    | -0.608852 | -1.470034 | 0.074242  | 0.289307  | 1.000      |
| 613 GOBP-BLOOD-VESSEL-MORPHOGENESIS                   | GO-0048514    | 14   | -0.524079 | -1.471157 | 0.064156  | 0.289922  | 1.000      |
| 614 GOBP-CELLULAR-RESPONSE-TO-BIOTIC-STIMULUS         | GO-0071216    | 8    | -0.604991 | -1.471758 | 0.061605  | 0.291454  | 1.000      |
| 615 GOBP-DNA-METABOLIC-PROCESS                        | GO-0006259    | 6    | -0.673749 | -1.478918 | 0.044961  | 0.280553  | 1.000      |
| 616 GOBP-REGULATION-OF-LEUKOCYTE-DIFFERENTIATION      | GO-1902105    | 9    | -0.587632 | -1.479242 | 0.063470  | 0.282481  | 1.000      |
| 617 GOBP-CELLULAR-RESPONSE-TO-MOLECULE-OF-BACTERIA... | GO-0071219    | 8    | -0.604991 | -1.481979 | 0.061728  | 0.280022  | 1.000      |
| 618 GOBP-ORGANONITROGEN-COMPOUND-CATABOLIC-PROCESS    | GO-1901565    | 9    | -0.604426 | -1.482138 | 0.051750  | 0.282513  | 1.000      |
| 619 GOBP-REGULATION-OF-EXTRINSIC-APOPTOTIC-SIGNALI... | GO-2001236    | 6    | -0.672396 | -1.482403 | 0.046948  | 0.284975  | 1.000      |
| 620 GOBP-TUBE-DEVELOPMENT                             | GO-0035295    | 18   | -0.510793 | -1.484679 | 0.052561  | 0.283516  | 1.000      |
| 621 GOBP-MUSCLE-CELL-PROLIFERATION                    | GO-0033002    | 8    | -0.612194 | -1.484760 | 0.043541  | 0.286353  | 1.000      |
| 622 GOBP-REGULATION-OF-PROTEIN-CATABOLIC-PROCESS      | GO-0042176    | 7    | -0.637297 | -1.485548 | 0.056923  | 0.282305  | 1.000      |
| 623 GOBP-ERBB-SIGNALING-PATHWAY                       | GO-0038127    | 5    | -0.722630 | -1.489523 | 0.034215  | 0.283106  | 1.000      |
| 624 GOBP-CHROMATIN-ORGANIZATION                       | GO-0006325    | 5    | -0.722892 | -1.490524 | 0.036866  | 0.284118  | 1.000      |
| 626 GOBP-MONOSACCHARIDE-METABOLIC-PROCESS             | GO-0005996    | 6    | -0.673422 | -1.491129 | 0.051128  | 0.289027  | 1.000      |
| 627 GOBP-EPITHELIAL-CELL-PROLIFERATION                | GO-0050673    | 12   | -0.550209 | -1.491385 | 0.069672  | 0.291564  | 1.000      |
| 628 GOBP-POSITIVE-REGULATION-OF-APOPTOTIC-SIGNALIN... | GO-2001235    | 5    | -0.734940 | -1.493987 | 0.043339  | 0.289385  | 1.000      |
| 629 GOBP-IMMUNE-EFFECTOR-PROCESS                      | GO-0002252    | 10   | -0.583485 | -1.494707 | 0.048780  | 0.291249  | 1.000      |
| 630 GOBP-TUBE-MORPHOGENESIS                           | GO-0035239    | 15   | -0.522309 | -1.505098 | 0.053908  | 0.273409  | 1.000      |
| 631 GOBP-PROTEIN-MODIFICATION-BY-SMALL-PROTEIN-CON... | GO-0032446    | 6    | -0.691855 | -1.508328 | 0.033233  | 0.270355  | 1.000      |
| 632 GOBP-POSITIVE-REGULATION-OF-SMOOTH-MUSCLE-CELL... | GO-0048661    | 5    | -0.732086 | -1.509184 | 0.037736  | 0.271924  | 1.000      |
| 633 GOBP-RESPONSE-TO-BACTERIUM                        | GO-0009617    | 13   | -0.559844 | -1.510477 | 0.042877  | 0.272539  | 1.000      |
| 634 GOBP-NEGATIVE-REGULATION-OF-PROTEIN-MODIFICATI... | GO-0031400    | 10   | -0.600181 | -1.514599 | 0.044863  | 0.268169  | 1.000      |
| 635 GOBP-POSITIVE-REGULATION-OF-MYELOID-LEUKOCYTE...  | GO-0002763    | 6    | -0.686842 | -1.515990 | 0.048465  | 0.268528  | 1.000      |
| 636 REACTOME-BETA-CATENIN-INDEPENDENT-WNT-SIGNALING   | R-RNO-3858494 | 5    | -0.740174 | -1.519006 | 0.022013  | 0.265945  | 1.000      |
| 637 GOBP-CIRCADIEN-RHYTHM                             | GO-0007623    | 13   | -0.545876 | -1.519849 | 0.043185  | 0.267258  | 1.000      |
| 638 GOBP-MITOTIC-CELL-CYCLE                           | GO-0000278    | 10   | -0.590661 | -1.519872 | 0.042336  | 0.270544  | 1.000      |
| 639 GOBP-RESPONSE-TO-RADIATION                        | GO-0009314    | 13   | -0.551247 | -1.523121 | 0.049226  | 0.266780  | 1.000      |
| 640 GOBP-NEGATIVE-REGULATION-OF-BINDING               | GO-0051100    | 6    | -0.678112 | -1.523159 | 0.046225  | 0.270076  | 1.000      |
| 641 GOBP-REGULATION-OF-CELLULAR-LOCALIZATION          | GO-0060341    | 17   | -0.522519 | -1.524919 | 0.031464  | 0.270129  | 1.000      |
| 642 REACTOME-MAPK-TARGETS-NUCLEAR-EVENTS-MEDIATED.... | R-HSA-450282  | 5    | -0.715967 | -1.526846 | 0.035427  | 0.270064  | 1.000      |

Continuation of Table S14

| NAME                                                  | ID            | SIZE | ES        | NES       | NOM.p.val | FDR.q.val | FWER.p.val |
|-------------------------------------------------------|---------------|------|-----------|-----------|-----------|-----------|------------|
| 643 GOBP-BIOLOGICAL-PROCESS-INVOLVED-IN-SYMBIOTIC.... | GO-004440     | 11   | -0.574124 | -1.527849 | 0.046784  | 0.271718  | 1.000      |
| 644 GOBP-ENZYME-LINKED-RECEPTOR-PROTEIN-SIGNALING.... | GO-0007167    | 24   | -0.478180 | -1.538891 | 0.034076  | 0.255122  | 1.000      |
| 645 GOBP-CHROMOSOME-ORGANIZATION                      | GO-0051276    | 6    | -0.705104 | -1.540686 | 0.027287  | 0.255059  | 1.000      |
| 646 GOBP-REGULATION-OF-MITOTIC-CELL-CYCLE             | GO-0007346    | 5    | -0.742239 | -1.540790 | 0.033333  | 0.258328  | 1.000      |
| 647 GOBP-SKIN-DEVELOPMENT                             | GO-0043588    | 5    | -0.730149 | -1.541176 | 0.040310  | 0.261079  | 1.000      |
| 648 GOBP-MITOCHONDRION-ORGANIZATION                   | GO-0007005    | 7    | -0.675904 | -1.548931 | 0.036220  | 0.250316  | 1.000      |
| 649 GOBP-RESPONSE-TO-REACTIVE-OXYGEN-SPECIES          | GO-0000302    | 8    | -0.647348 | -1.550406 | 0.031019  | 0.251207  | 1.000      |
| 650 REACTOME-HEMOSTASIS                               | R-RNO-109582  | 14   | -0.554022 | -1.551307 | 0.031989  | 0.253327  | 1.000      |
| 651 GOBP-PHAGOCYTOSIS                                 | GO-0006909    | 5    | -0.739949 | -1.551887 | 0.024316  | 0.256039  | 1.000      |
| 652 GOBP-RHYTHMIC-PROCESS                             | GO-0048511    | 15   | -0.549462 | -1.555519 | 0.028302  | 0.252716  | 1.000      |
| 653 GOBP-NEGATIVE-REGULATION-OF-NUCLEOBASE-CONTAIN... | GO-0045934    | 13   | -0.561585 | -1.557017 | 0.036212  | 0.253808  | 1.000      |
| 654 REACTOME-SIGNALING-BY-INTERLEUKINS                | R-RNO-449147  | 15   | -0.540274 | -1.558723 | 0.036932  | 0.253987  | 1.000      |
| 655 GOBP-RESPONSE-TO-MOLECULE-OF-BACTERIAL-ORIGIN     | GO-0002237    | 13   | -0.559844 | -1.562099 | 0.028050  | 0.251192  | 1.000      |
| 656 GOBP-REGULATION-OF-EPITHELIAL-CELL-MIGRATION      | GO-0010632    | 6    | -0.705708 | -1.565336 | 0.018293  | 0.249027  | 1.000      |
| 657 GOBP-RESPONSE-TO-OXIDATIVE-STRESS                 | GO-0006979    | 8    | -0.647348 | -1.566597 | 0.031157  | 0.250695  | 1.000      |
| 658 GOBP-NEGATIVE-REGULATION-OF-APOPTOTIC-SIGNALIN... | GO-2001234    | 7    | -0.674534 | -1.569100 | 0.028860  | 0.249839  | 1.000      |
| 659 GOBP-REGULATION-OF-PROTEIN-BINDING                | GO-0043393    | 7    | -0.673716 | -1.570443 | 0.033537  | 0.253602  | 1.000      |
| 660 GOBP-REGULATION-OF-BODY-FLUID-LEVELS              | GO-0050878    | 11   | -0.597467 | -1.570443 | 0.024965  | 0.255950  | 1.000      |
| 661 GOBP-REGULATION-OF-HEMOPOIESIS                    | GO-1903706    | 10   | -0.619904 | -1.572032 | 0.031884  | 0.257611  | 1.000      |
| 662 GOBP-POSITIVE-REGULATION-OF-ANION-TRANSPORT       | GO-1903793    | 9    | -0.632214 | -1.573492 | 0.027616  | 0.259134  | 1.000      |
| 663 GOBP-CELLULAR-HEALING                             | GO-0071241    | 13   | -0.573044 | -1.582571 | 0.028610  | 0.244817  | 1.000      |
| 664 GOBP-CELLULAR-RESPONSE-TO-INORGANIC-SUBSTANCE     | GO-0042060    | 11   | -0.605947 | -1.582897 | 0.021645  | 0.248496  | 1.000      |
| 665 GOBP-CELLULAR-RESPONSE-TO-DNA-DAMAGE-STIMULUS     | GO-0006974    | 5    | -0.761192 | -1.584056 | 0.016975  | 0.250800  | 1.000      |
| 666 GOBP-REGULATION-OF-MYELOID-LEUKOCYTE-DIFFERENT... | GO-0002761    | 8    | -0.655406 | -1.584343 | 0.025875  | 0.254975  | 1.000      |
| 667 GOBP-APOPTOTIC-MITOCHONDRIAL-CHANGES              | GO-0008637    | 6    | -0.724333 | -1.585737 | 0.014354  | 0.256772  | 1.000      |
| 668 GOBP-CYTOKINE-PRODUCTION                          | GO-0001816    | 10   | -0.612547 | -1.586598 | 0.028571  | 0.260261  | 1.000      |
| 669 GOBP-NEGATIVE-REGULATION-OF-RESPONSE-TO-STIMULUS  | GO-0048585    | 16   | -0.531339 | -1.586816 | 0.037657  | 0.264960  | 1.000      |
| 670 GOBP-NEGATIVE-REGULATION-OF-BIOSYNTHETIC-PROCESS  | GO-0009890    | 13   | -0.577697 | -1.591550 | 0.019417  | 0.260685  | 1.000      |
| 671 REACTOME-TOLL-LIKE-RECEPTOR-TLR1-TLR2-CASCADE     | R-RNO-168179  | 8    | -0.670845 | -1.592570 | 0.029806  | 0.264088  | 1.000      |
| 672 GOBP-RESPONSE-TO-METAL-ION                        | GO-0010038    | 15   | -0.543059 | -1.598558 | 0.015850  | 0.256662  | 1.000      |
| 673 REACTOME-TOLL-LIKE-RECEPTOR-CASCADES              | R-RNO-168898  | 8    | -0.670845 | -1.599909 | 0.020313  | 0.259409  | 1.000      |
| 674 GOBP-REGULATION-OF-VASCULAR-ASSOCIATED-SMOOTH...  | GO-1904705    | 5    | -0.778860 | -1.602224 | 0.014331  | 0.260437  | 1.000      |
| 675 REACTOME-TOLL-LIKE-RECEPTOR-9-TLR9-CASCADE        | R-RNO-168138  | 8    | -0.670845 | -1.607773 | 0.033528  | 0.254186  | 1.000      |
| 676 GOBP-NEGATIVE-REGULATION-OF-CELL-DIFFERENTIATION  | GO-0045596    | 13   | -0.588441 | -1.609863 | 0.012894  | 0.255832  | 1.000      |
| 677 GOBP-REGULATION-OF-CELLULAR-PROTEIN-LOCALIZATION  | GO-1903827    | 12   | -0.597250 | -1.609962 | 0.024148  | 0.261616  | 1.000      |
| 678 GOBP-CIRCULATORY-SYSTEM-DEVELOPMENT               | GO-0072359    | 21   | -0.514645 | -1.612949 | 0.030749  | 0.260931  | 1.000      |
| 679 GOBP-PROTEIN-CATABOLIC-PROCESS                    | GO-0030163    | 8    | -0.669457 | -1.617114 | 0.022189  | 0.258427  | 1.000      |
| 680 HALLMARK-ALLOGRAFT-REJECTION                      | M5950         | 7    | -0.702358 | -1.625750 | 0.016743  | 0.247502  | 1.000      |
| 681 REACTOME-MYD88-INDEPENDENT-TLR4-CASCADE           | R-RNO-166166  | 8    | -0.670845 | -1.626224 | 0.024206  | 0.253095  | 1.000      |
| 682 GOBP-TRANSMEMBRANE-RECEPTOR-PROTEIN-SERINE-THR... | GO-0007178    | 6    | -0.750179 | -1.626701 | 0.016248  | 0.258933  | 1.000      |
| 683 GOBP-POSITIVE-REGULATION-OF-MYELOID-CELL-DIFFE... | GO-0045639    | 7    | -0.708362 | -1.635383 | 0.020000  | 0.246571  | 1.000      |
| 684 REACTOME-SIGNALING-BY-RHO-GTPASES-MIRO-GTPASES... | R-RNO-9716542 | 9    | -0.660284 | -1.636720 | 0.010219  | 0.250339  | 1.000      |
| 685 GOBP-CELLULAR-RESPONSE-TO-LIPID                   | GO-0071396    | 15   | -0.578584 | -1.646026 | 0.013793  | 0.237044  | 1.000      |

Continuation of Table S14

| NAME                                                  | ID           | SIZE | ES        | NES       | NOM.p.val | FDR.q.val | FWER.p.val |
|-------------------------------------------------------|--------------|------|-----------|-----------|-----------|-----------|------------|
| 686 GOBP-CELLULAR-RESPONSE-TO-OXYGEN-CONTAINING.CO... | GO-1901701   | 29   | -0.493290 | -1.646801 | 0.019330  | 0.242403  | 1.000      |
| 687 GOBP-APOPTOTIC-SIGNALING-PATHWAY                  | GO-0097190   | 15   | -0.582939 | -1.654206 | 0.017833  | 0.233949  | 0.999      |
| 688 GOBP-NEGATIVE-REGULATION-OF-DEVELOPMENTAL-PROCESS | GO-0051093   | 13   | -0.58441  | -1.660823 | 0.017143  | 0.226673  | 0.999      |
| 689 GOBP-REGULATION-OF-IMMUNE-RESPONSE                | GO-0050776   | 12   | -0.613339 | -1.665371 | 0.015471  | 0.224716  | 0.999      |
| 690 GOBP-PROTEIN-MODIFICATION-BY-SMALL-PROTEIN.CON... | GO-0070647   | 7    | -0.727459 | -1.669098 | 0.014948  | 0.225311  | 0.999      |
| 691 GOBP-POSITIVE-REGULATION-OF-TRANSCRIPTION-BY-R... | GO-0045944   | 24   | -0.520024 | -1.670979 | 0.019048  | 0.229584  | 0.999      |
| 692 GOBP-POSITIVE-REGULATION-OF-BIOSYNTHETIC-PROCESS  | GO-0008981   | 27   | -0.526428 | -1.675706 | 0.011827  | 0.228155  | 0.999      |
| 693 GOBP-MACROMOLECULE-CATABOLIC-PROCESS              | GO-0009057   | 12   | -0.616347 | -1.675857 | 0.015737  | 0.236765  | 0.999      |
| 694 GOBP-RESPONSE-TO-WOUNDING                         | GO-0009611   | 15   | -0.593490 | -1.679823 | 0.009790  | 0.236967  | 0.998      |
| 695 GOBP-POSITIVE-REGULATION-OF-PRL-MIRNA-TRANSCRI... | GO-1902895   | 7    | -0.737014 | -1.686360 | 0.011994  | 0.231239  | 0.996      |
| 696 GOBP-COAGULATION                                  | GO-0050817   | 8    | -0.695155 | -1.687644 | 0.014948  | 0.238675  | 0.996      |
| 697 GOBP-CELL-CYCLE                                   | GO-0007049   | 21   | -0.543600 | -1.689326 | 0.014825  | 0.245422  | 0.995      |
| 698 REACTOME-RHO-GTPASE-EFFECTORS                     | R-RNO-195258 | 9    | -0.660284 | -1.692465 | 0.011628  | 0.249449  | 0.994      |
| 699 GOBP-REGULATION-OF-MYELOID-CELL-DIFFERENTIATION   | GO-0045637   | 9    | -0.680721 | -1.693223 | 0.008511  | 0.259851  | 0.994      |
| 700 GOBP-CELLULAR-RESPONSE-TO-CADMIIUM-ION            | GO-0071276   | 5    | -0.817470 | -1.699882 | 0.001577  | 0.256770  | 0.988      |
| 701 GOBP-SMOOTH-MUSCLE-CELL-PROLIFERATION             | GO-0048659   | 6    | -0.765608 | -1.704261 | 0.004615  | 0.260477  | 0.987      |
| 702 GOBP-PRL-MIRNA-TRANSCRIPTION-BY-RNA-POLYMERASE-II | GO-0061614   | 7    | -0.737014 | -1.712164 | 0.003035  | 0.257147  | 0.983      |
| 703 GOBP-IMMUNE-SYSTEM-DEVELOPMENT                    | GO-0002520   | 17   | -0.577877 | -1.712215 | 0.008392  | 0.273084  | 0.983      |
| 704 GOBP-REGULATION-OF-CELL-CYCLE                     | GO-0051726   | 13   | -0.622145 | -1.717631 | 0.011817  | 0.277643  | 0.978      |
| 705 GOBP-RESPONSE-TO-DRUG                             | GO-0042493   | 11   | -0.659907 | -1.719809 | 0.010309  | 0.291391  | 0.978      |
| 706 GOBP-POSITIVE-REGULATION-OF-IMMUNE-SYSTEM-PROCESS | GO-0002684   | 18   | -0.567760 | -1.720327 | 0.006748  | 0.312281  | 0.978      |
| 707 GOBP-REGULATION-OF-IMMUNE-SYSTEM-PROCESS          | GO-0002682   | 21   | -0.554817 | -1.721168 | 0.005479  | 0.335933  | 0.978      |
| 708 GOBP-RESPONSE-TO-LIPID                            | GO-0033993   | 19   | -0.572650 | -1.725202 | 0.011111  | 0.351913  | 0.975      |
| 709 GOBP-CELLULAR-RESPONSE-TO-CHEMICAL-STRESS         | GO-0062197   | 7    | -0.761052 | -1.753678 | 0.001536  | 0.285094  | 0.938      |
| 710 GOBP-REGULATION-OF-APOPTOTIC-SIGNALING-PATHWAY    | GO-2001233   | 10   | -0.678609 | -1.761606 | 0.004392  | 0.289781  | 0.911      |
| 711 GOBP-CELLULAR-RESPONSE-TO-REACTIVE-OXYGEN-SPECIES | GO-0034614   | 7    | -0.761052 | -1.780140 | 0.007452  | 0.265944  | 0.864      |
| 712 GOBP-LEUKOCYTE-DIFFERENTIATION                    | GO-0002521   | 15   | -0.630362 | -1.813362 | 0.002721  | 0.204134  | 0.724      |
| 713 GOBP-RESPONSE-TO-CADMIIUM-ION                     | GO-0046686   | 6    | -0.843411 | -1.826616 | 0.000000  | 0.206032  | 0.673      |
| 714 GOBP-POSITIVE-REGULATION-OF-NUCLEOBASE-CONTAIN... | GO-0045935   | 28   | -0.551661 | -1.838182 | 0.003861  | 0.209858  | 0.614      |
| 715 GOBP-MYELOID-LEUKOCYTE-DIFFERENTIATION            | GO-0002573   | 11   | -0.696257 | -1.846048 | 0.001406  | 0.237667  | 0.583      |
| 716 GOBP-MYELOID-CELL-DIFFERENTIATION                 | GO-0030099   | 13   | -0.689421 | -1.893598 | 0.001379  | 0.180309  | 0.396      |
| 717 REACTOME-INNATE-IMMUNE-SYSTEM                     | R-RNO-168249 | 16   | -0.639921 | -1.899566 | 0.001372  | 0.253494  | 0.376      |
| 718 GOBP-PLATELET-ACTIVATION                          | GO-0030168   | 6    | -0.862601 | -1.917365 | 0.000000  | 0.399732  | 0.305      |

End of Table



Supplementary Table S15: BG early profile (8 DPL peak) GSEA results.

| Begin of Table S15 |                                                   |               |      |          |          |           |           |            |
|--------------------|---------------------------------------------------|---------------|------|----------|----------|-----------|-----------|------------|
|                    | NAME                                              | ID            | SIZE | ES       | NES      | NOM.p.val | FDR.q.val | FWER.p.val |
| 0                  | GOBP-MEMORY                                       | GO:0007613    | 13   | 0.586962 | 2.102377 | 0.000000  | 0.625162  | 0.373      |
| 1                  | GOBP-CATION-TRANSPORT                             | GO:0008112    | 25   | 0.421588 | 1.803097 | 0.007067  | 1.000000  | 0.973      |
| 2                  | GOBP-NERVE-DEVELOPMENT                            | GO:0021675    | 9    | 0.565701 | 1.733075 | 0.014925  | 1.000000  | 0.993      |
| 3                  | REACTOME-SIGNALING-BY-NTRK2-TRKB                  | R-RNO-9006115 | 6    | 0.662655 | 1.713326 | 0.037037  | 1.000000  | 0.996      |
| 4                  | GOBP_POSITIVE-REGULATION-OF-LIPASE-ACTIVITY       | GO:0060193    | 5    | 0.698339 | 1.702445 | 0.029326  | 1.000000  | 0.998      |
| 5                  | GOBP-NEGATIVE-REGULATION-OF-NEURON-APOPTOTIC-P... | GO:0043524    | 8    | 0.565633 | 1.682155 | 0.031447  | 1.000000  | 0.999      |
| 6                  | GOBP-REGULATION-OF-PHOSPHOLIPASE-C-ACTIVITY       | GO:1900274    | 5    | 0.698339 | 1.677069 | 0.027778  | 1.000000  | 0.999      |
| 7                  | GOBP-SYNAPTIC-SIGNALING                           | GO:0099536    | 47   | 0.337414 | 1.628808 | 0.020101  | 1.000000  | 1.000      |
| 8                  | GOBP-BEHAVIOR                                     | GO:0007610    | 32   | 0.353545 | 1.625855 | 0.013636  | 1.000000  | 1.000      |
| 9                  | GOBP-REGULATION-OF-NEURON-PROJECTION-DEVELOPMENT  | GO:0010975    | 16   | 0.431813 | 1.603620 | 0.042105  | 1.000000  | 1.000      |
| 10                 | GOBP-REGULATION-OF-PHOSPHOLIPASE-ACTIVITY         | GO:0010517    | 6    | 0.613173 | 1.591696 | 0.040984  | 1.000000  | 1.000      |
| 11                 | GOBP-RESPONSE-TO-NERVE-GROWTH-FACTOR              | GO:1990089    | 7    | 0.592249 | 1.590288 | 0.050000  | 1.000000  | 1.000      |
| 12                 | GOBP-REGULATION-OF-LIPASE-ACTIVITY                | GO:0060191    | 6    | 0.613173 | 1.582726 | 0.063768  | 1.000000  | 1.000      |
| 13                 | GOBP-NEUROTROPHIN-SIGNALING-PATHWAY               | GO:0038179    | 6    | 0.594194 | 1.574801 | 0.048991  | 1.000000  | 1.000      |
| 14                 | GOBP-NEURON-DEVELOPMENT                           | GO:0048666    | 33   | 0.339039 | 1.563936 | 0.026217  | 1.000000  | 1.000      |
| 15                 | GOBP-CELL-CELL-SIGNALING                          | GO:0007267    | 56   | 0.331361 | 1.553680 | 0.009174  | 1.000000  | 1.000      |
| 16                 | GOBP-NEUROTROPHIN-TRK-RECEPTOR-SIGNALING-PATHWAY  | GO:0048011    | 6    | 0.594194 | 1.553286 | 0.055556  | 0.946455  | 1.000      |
| 17                 | GOBP-REGULATION-OF-TRANS-SYNAPTIC-SIGNALING       | GO:0099177    | 40   | 0.327914 | 1.544139 | 0.021186  | 0.929174  | 1.000      |
| 18                 | GOBP-NERVOUS-SYSTEM-PROCESS                       | GO:0050877    | 38   | 0.317309 | 1.542059 | 0.013216  | 0.887685  | 1.000      |
| 19                 | GOBP-REGULATION-OF-PEPTIDYL-SERINE-PHOSPHORYLA... | GO:0033135    | 8    | 0.519312 | 1.541639 | 0.072555  | 0.844781  | 1.000      |
| 20                 | GOBP-REGULATION-OF-NMDA-RECEPTOR-ACTIVITY         | GO:2000310    | 10   | 0.475723 | 1.522818 | 0.057692  | 0.874604  | 1.000      |
| 21                 | GOBP-LONG-TERM-MEMORY                             | GO:0007616    | 6    | 0.564900 | 1.520606 | 0.065903  | 0.841472  | 1.000      |
| 22                 | GOBP_POSITIVE-REGULATION-OF-PEPTIDYL-SERINE_PH... | GO:0033138    | 8    | 0.519312 | 1.519085 | 0.095238  | 0.809561  | 1.000      |
| 23                 | GOBP-REGULATION-OF-NEURON-DIFFERENTIATION         | GO:0045664    | 5    | 0.626381 | 1.508076 | 0.077957  | 0.814428  | 1.000      |
| 24                 | GOBP-NEURON-DIFFERENTIATION                       | GO:0030182    | 36   | 0.324184 | 1.501531 | 0.048673  | 0.802127  | 1.000      |
| 25                 | GOBP_POSITIVE-REGULATION-OF-LONG-TERM-SYNAPTIC... | GO:1900273    | 5    | 0.631234 | 1.500513 | 0.082888  | 0.775103  | 1.000      |
| 26                 | GOBP-NEGATIVE-REGULATION-OF-NEURON-DEATH          | GO:1901215    | 11   | 0.450046 | 1.496745 | 0.049342  | 0.758595  | 1.000      |
| 27                 | GOBP-REGULATION-OF-SYNAPSE-STRUCTURE-OR-ACTIVITY  | GO:0050803    | 11   | 0.454545 | 1.488265 | 0.055728  | 0.760855  | 1.000      |
| 28                 | GOBP-REGULATION-OF-ION-TRANSPORT                  | GO:0043269    | 36   | 0.313378 | 1.475224 | 0.049020  | 0.778360  | 1.000      |
| 29                 | GOBP_POSITIVE-REGULATION-OF-TRANSPORT             | GO:0010562    | 24   | 0.342758 | 1.469525 | 0.044715  | 0.770544  | 1.000      |
| 30                 | GOBP_COGNITION                                    | GO:0050890    | 28   | 0.328435 | 1.443552 | 0.047101  | 0.836379  | 1.000      |
| 31                 | HALLMARK_KRAS-SIGNALING_UP                        | M5953         | 6    | 0.530501 | 1.436866 | 0.075581  | 0.834213  | 1.000      |
| 32                 | GOBP_POSITIVE-REGULATION-OF-TRANSMEMBRANE_TRAN... | GO:0034764    | 7    | 0.515390 | 1.435338 | 0.089385  | 0.814059  | 1.000      |
| 33                 | GOBP-REGULATION-OF-TRANSPORT                      | GO:0051049    | 44   | 0.293922 | 1.413607 | 0.053922  | 0.867050  | 1.000      |
| 34                 | GOBP-REGULATION-OF-CATION-TRANSMEMBRANE_TRANSP... | GO:1904062    | 16   | 0.376954 | 1.395064 | 0.111511  | 0.910023  | 1.000      |
| 35                 | GOBP_POSITIVE-REGULATION-OF-NEURON_PROJECTION...  | GO:0010976    | 5    | 0.573435 | 1.394029 | 0.107817  | 0.888373  | 1.000      |
| 36                 | GOBP-REGULATION-OF-CELL_PROJECTION-ORGANIZATION   | GO:0031344    | 20   | 0.350048 | 1.393083 | 0.082353  | 0.868397  | 1.000      |
| 37                 | GOBP-REGULATION-OF-PROTEIN-PHOSPHORYLATION        | GO:0001932    | 26   | 0.308394 | 1.381989 | 0.084677  | 0.887928  | 1.000      |
| 38                 | GOBP-TRANSMEMBRANE-RECEPTOR-PROTEIN-TYROSINE_K... | GO:0007169    | 19   | 0.336086 | 1.365265 | 0.091549  | 0.927280  | 1.000      |
| 39                 | GOBP_POSITIVE-REGULATION-OF-PEPTIDYL-TYROSINE...  | GO:0050731    | 8    | 0.462500 | 1.363957 | 0.133127  | 0.908630  | 1.000      |
| 40                 | GOBP-NEGATIVE-REGULATION-OF-CATALYTIC-ACTIVITY    | GO:0043086    | 17   | 0.336174 | 1.349111 | 0.107807  | 0.943980  | 1.000      |

Continuation of Table S15

| NAME | ID                                                 | SIZE | ES        | NES      | NOM.p.val | FDR.q.val | FWER.p.val |
|------|----------------------------------------------------|------|-----------|----------|-----------|-----------|------------|
| 41   | GOBP-REGULATION-OF-LONG-TERM-SYNAPTIC-POTENTIAL... | 6    | 0.526804  | 1.345409 | 0.151335  | 0.935476  | 1.000      |
| 42   | GOBP-POSITIVE-REGULATION-OF-TRANSFERASE-ACTIVITY   | 20   | 0.320449  | 1.317525 | 0.124481  | 1.000000  | 1.000      |
| 43   | GOBP-POSITIVE-REGULATION-OF-SYNAPTIC-TRANSMISSION  | 15   | 0.346662  | 1.315701 | 0.138047  | 1.000000  | 1.000      |
| 44   | GOBP-CELL-PROJECTION-ORGANIZATION                  | 34   | 0.288777  | 1.313954 | 0.097778  | 0.994272  | 1.000      |
| 45   | REACTOME-ACTIVATION-OF-NMDA-RECEPTORS-AND-POST...  | 16   | 0.344284  | 1.307321 | 0.108696  | 0.998971  | 1.000      |
| 46   | GOBP-POSITIVE-REGULATION-OF-HYDROLASE-ACTIVITY     | 16   | 0.343225  | 1.306930 | 0.131034  | 0.978962  | 1.000      |
| 47   | GOBP-NEGATIVE-REGULATION-OF-PEPTIDASE-ACTIVITY     | 6    | 0.502978  | 1.299203 | 0.158358  | 0.988251  | 1.000      |
| 48   | GOBP-POSITIVE-REGULATION-OF-CATALYTIC-ACTIVITY     | 30   | 0.283846  | 1.295197 | 0.116183  | 0.982978  | 1.000      |
| 49   | GOBP-NEUROGENESIS                                  | 40   | 0.276123  | 1.287505 | 0.106481  | 0.990969  | 1.000      |
| 50   | HALLMARK-P13K-AKT-MTOR-SIGNALING                   | 6    | 0.490942  | 1.280965 | 0.184438  | 0.996258  | 1.000      |
| 51   | GOBP-CATION-TRANSMEMBRANE-TRANSPORT                | 18   | 0.331029  | 1.279110 | 0.162630  | 0.984469  | 1.000      |
| 52   | GOBP-REGULATION-OF-CATION-CHANNEL-ACTIVITY         | 14   | 0.353197  | 1.270461 | 0.175862  | 0.998630  | 1.000      |
| 53   | GOBP-PERIPHERAL-NERVOUS-SYSTEM-DEVELOPMENT         | 9    | 0.411433  | 1.264759 | 0.170213  | 1.000000  | 1.000      |
| 54   | GOBP-NEGATIVE-REGULATION-OF-CYSTEINE-TYPE-ENDO...  | 5    | 0.513106  | 1.261071 | 0.165746  | 0.998356  | 1.000      |
| 55   | GOBP-POSITIVE-REGULATION-OF-CELL-PROJECTION-OR...  | 10   | 0.398549  | 1.260058 | 0.179710  | 0.984178  | 1.000      |
| 56   | GOBP-REGULATION-OF-NEUROTRANSMITTER-RECEPTOR-A...  | 13   | 0.356768  | 1.255446 | 0.160839  | 0.983494  | 1.000      |
| 57   | GOBP-POSITIVE-REGULATION-OF-PROTEIN-MODIFICATI...  | 23   | 0.298172  | 1.254352 | 0.167347  | 0.970161  | 1.000      |
| 58   | GOBP-SYNAPSE-ORGANIZATION                          | 17   | 0.323054  | 1.251861 | 0.185714  | 0.963410  | 1.000      |
| 59   | GOBP-REGULATION-OF-HORMONE-LEVELS                  | 12   | 0.358843  | 1.241763 | 0.188679  | 0.985164  | 1.000      |
| 60   | REACTOME-UNBLOCKING-OF-NMDA-RECEPTORS-GLUTAMAT...  | 12   | 0.348542  | 1.235293 | 0.192308  | 0.993437  | 1.000      |
| 61   | GOBP-DEFENSE-RESPONSE                              | 19   | 0.507890  | 1.23504  | 0.179931  | 0.984065  | 1.000      |
| 62   | GOBP-POSITIVE-REGULATION-OF-CATION-TRANSMEMBR...   | 5    | 0.323054  | 1.227369 | 0.184282  | 0.991750  | 1.000      |
| 63   | REACTOME-LONG-TERM-POTENTIATION                    | 10   | 0.384855  | 1.226857 | 0.195783  | 0.978042  | 1.000      |
| 64   | GOBP-AXON-DEVELOPMENT                              | 18   | 0.313077  | 1.225383 | 0.184502  | 0.967772  | 1.000      |
| 65   | GOBP-REGULATION-OF-PHOSPHORUS-METABOLIC-PROCESS    | 27   | 0.285357  | 1.223307 | 0.185520  | 0.953309  | 1.000      |
| 66   | GOBP-POSITIVE-REGULATION-OF-PROTEIN-PHOSPHORYL...  | 23   | 0.298172  | 1.221312 | 0.205761  | 0.953216  | 1.000      |
| 67   | GOBP-REGULATION-OF-MEMBRANE-POTENTIAL              | 17   | 0.318722  | 1.216002 | 0.219231  | 0.956842  | 1.000      |
| 68   | GOBP-PEPTIDYL-TYROSINE-MODIFICATION                | 10   | 0.385097  | 1.214244 | 0.210031  | 0.949391  | 1.000      |
| 69   | GOBP-RECEPTOR-METABOLIC-PROCESS                    | 5    | 0.482779  | 1.204479 | 0.190981  | 0.968869  | 1.000      |
| 70   | GOBP-SENSORY-PERCEPTION                            | 9    | 0.397368  | 1.204000 | 0.216617  | 0.969000  | 1.000      |
| 71   | GOBP-SMALL-GTPASE-MEDIATED-SIGNAL-TRANSDUCTION     | 8    | 0.398566  | 1.192449 | 0.234568  | 0.985311  | 1.000      |
| 72   | GOBP-REGULATION-OF-TRANSFERASE-ACTIVITY            | 22   | 0.278565  | 1.189361 | 0.210970  | 0.982882  | 1.000      |
| 73   | REACTOME-TRANSCRIPTIONAL-REGULATION-BY-MECP2       | 7    | 0.422698  | 1.188313 | 0.255014  | 0.973254  | 1.000      |
| 74   | GOBP-REGULATION-OF-SIGNALING-RECEPTOR-ACTIVITY     | 14   | 0.323774  | 1.188187 | 0.243506  | 0.960856  | 1.000      |
| 75   | GOBP-REGULATION-OF-POSTSYNAPTIC-MEMBRANE-POTEN...  | 14   | 0.332216  | 1.185434 | 0.227891  | 0.958073  | 1.000      |
| 76   | GOBP-ION-HOMEOSTASIS                               | 16   | 0.319886  | 1.183774 | 0.250784  | 0.951084  | 1.000      |
| 77   | GOBP-INSULIN-SECRETION                             | 7    | 0.430593  | 1.180256 | 0.267606  | 0.951314  | 1.000      |
| 78   | GOBP-PROTEIN-PHOSPHORYLATION                       | 34   | 0.251425  | 1.179764 | 0.239669  | 0.940795  | 1.000      |
| 79   | GOBP-PEPTIDE-HORMONE-SECRETION                     | 7    | 0.430593  | 1.178769 | 0.271053  | 0.932536  | 1.000      |
| 80   | GOBP-REGULATION-OF-INTRACELLULAR-SIGNAL-TRANSD...  | 21   | 0.1902531 | 1.176046 | 0.219331  | 0.930137  | 1.000      |
| 81   | GOBP-NEURON-PROJECTION-ORGANIZATION                | 8    | 0.387500  | 1.173090 | 0.254777  | 0.927808  | 1.000      |
| 82   | GOBP-ACTIVATION-OF-PROTEIN-KINASE-ACTIVITY         | 11   | 0.345323  | 1.166073 | 0.264407  | 0.939484  | 1.000      |
| 83   | GOBP-ORGANOPHOSPHATE-METABOLIC-PROCESS             | 7    | 0.414705  | 1.165045 | 0.279279  | 0.931595  | 1.000      |

Continuation of Table S15

| NAME | ID                                                  | SIZE | ES       | NES      | NOM.p.val | FDR.q.val | FWER.p.val |
|------|-----------------------------------------------------|------|----------|----------|-----------|-----------|------------|
| 84   | GOBP-NEUROINFLAMMATORY_RESPONSE                     | 5    | 0.479492 | 1.164680 | 0.275660  | 0.921762  | 1.000      |
| 85   | GOBP-REGULATION_OF_PROTEIN_KINASE_ACTIVITY          | 22   | 0.275655 | 1.158781 | 0.260700  | 0.931319  | 1.000      |
| 86   | GOBP-TRANSMEMBRANE_TRANSPORT                        | 27   | 0.263346 | 1.158768 | 0.250000  | 0.920647  | 1.000      |
| 87   | GOBP-INOSITOL_LIPID_MEDIATED_SIGNALING              | 8    | 0.398535 | 1.157872 | 0.264797  | 0.912807  | 1.000      |
| 88   | GOBP-REGULATION_OF_ANION_TRANSMEMBRANE_TRANSPORT    | 5    | 0.457831 | 1.156713 | 0.255495  | 0.906300  | 1.000      |
| 89   | GOBP-RECEPTOR_INTERNALIZATION                       | 5    | 0.482779 | 1.154286 | 0.253561  | 0.904133  | 1.000      |
| 90   | GOBP-POSITIVE_REGULATION_OF_CELL_GROWTH             | 6    | 0.443102 | 1.147331 | 0.270195  | 0.917229  | 1.000      |
| 91   | GOBP-LEUKOCYTE_MIGRATION                            | 6    | 0.439024 | 1.143018 | 0.287390  | 0.921876  | 1.000      |
| 92   | GOBP-REGULATION_OF_TRANSMEMBRANE_TRANSPORT          | 23   | 0.270006 | 1.142541 | 0.256098  | 0.913708  | 1.000      |
| 93   | GOBP-CARBOHYDRATE_DERIVATIVE_METABOLIC_PROCESS      | 7    | 0.416946 | 1.136472 | 0.275281  | 0.923102  | 1.000      |
| 94   | GOBP-ERBB_SIGNALING_PATHWAY                         | 5    | 0.464265 | 1.133795 | 0.277922  | 0.921966  | 1.000      |
| 95   | GOBP-PEPTIDE_SECRETION                              | 9    | 0.371115 | 1.131023 | 0.265244  | 0.921237  | 1.000      |
| 96   | GOBP-DENDRITE_MORPHOGENESIS                         | 6    | 0.426829 | 1.130645 | 0.273481  | 0.912858  | 1.000      |
| 97   | REACTOME-ONCOGENIC_MAPK_SIGNALING                   | 5    | 0.471383 | 1.124776 | 0.291444  | 0.922290  | 1.000      |
| 98   | GOBP-INFLAMMATORY_RESPONSE                          | 12   | 0.331357 | 1.122780 | 0.283077  | 0.919544  | 1.000      |
| 99   | GOBP-REGULATION_OF_CYTOSOLIC_CALCIIUM_IION_CONCE... | 13   | 0.318126 | 1.115304 | 0.306931  | 0.934062  | 1.000      |
| 100  | GOBP-SYNAPTIC_TRANSMISSION_GLUTAMATERGIC            | 13   | 0.311801 | 1.113933 | 0.305031  | 0.929455  | 1.000      |
| 101  | GOBP-CELLULAR_MACROMOLECULE_LOCALIZATION            | 21   | 0.266577 | 1.107370 | 0.324042  | 0.941316  | 1.000      |
| 102  | GOBP-DIVALENT_INORGANIC_CATION_HOMEOSTASIS          | 13   | 0.318126 | 1.102203 | 0.300353  | 0.948280  | 1.000      |
| 103  | GOBP-REGULATION_OF_POSTSYNAPSE_ORGANIZATION         | 6    | 0.426829 | 1.101668 | 0.315493  | 0.941231  | 1.000      |
| 104  | GOBP-PEPTIDYL_SERINE_MODIFICATION                   | 12   | 0.321562 | 1.095198 | 0.328720  | 0.953425  | 1.000      |
| 105  | GOBP-CELL_MORPHOGENESIS                             | 24   | 0.252174 | 1.095061 | 0.321970  | 0.944877  | 1.000      |
| 106  | GOBP-CELLULAR_RESPONSE_TO_KETONE                    | 5    | 0.450174 | 1.094522 | 0.332454  | 0.937640  | 1.000      |
| 107  | GOBP-REGULATION_OF_PROTEIN_TYROSINE_KINASE_ACT...   | 5    | 0.445783 | 1.092863 | 0.309524  | 0.934014  | 1.000      |
| 108  | GOBP-CELLULAR_COMPONENT_MORPHOGENESIS               | 24   | 0.252174 | 1.091624 | 0.318519  | 0.929815  | 1.000      |
| 109  | GOBP-REGULATION_OF_AXONOGENESIS                     | 7    | 0.395062 | 1.085877 | 0.331429  | 0.938819  | 1.000      |
| 110  | GOBP-REGULATION_OF_PROTEIN_MODIFICATION_PROCESS     | 29   | 0.244284 | 1.085133 | 0.331967  | 0.932642  | 1.000      |
| 111  | GOBP-POSITIVE_REGULATION_OF_TRANSPORT               | 26   | 0.245082 | 1.084306 | 0.323144  | 0.926742  | 1.000      |
| 112  | GOBP-CELLULAR_IION_HOMEOSTASIS                      | 14   | 0.302520 | 1.083749 | 0.335463  | 0.920401  | 1.000      |
| 113  | GOBP-DENDRITIC_SPINE_DEVELOPMENT                    | 6    | 0.426829 | 1.081383 | 0.352025  | 0.919669  | 1.000      |
| 114  | GOBP-REGULATION_OF_SYNAPTIC_TRANSMISSION_GLUTA...   | 12   | 0.313965 | 1.079286 | 0.343653  | 0.917671  | 1.000      |
| 115  | GOBP-POSITIVE_REGULATION_OF_SIGNALING               | 34   | 0.227816 | 1.078752 | 0.337719  | 0.911041  | 1.000      |
| 116  | REACTOME-ANTIINFLAMMATORY_RESPONSE_FAVOURING...     | 5    | 0.442468 | 1.078693 | 0.371274  | 0.903369  | 1.000      |
| 117  | GOBP-POSITIVE_REGULATION_OF_MOLECULAR_FUNCTION      | 38   | 0.227800 | 1.077548 | 0.384977  | 0.899165  | 1.000      |
| 118  | GOBP-CELL_PART_MORPHOGENESIS                        | 24   | 0.252174 | 1.076980 | 0.347985  | 0.893424  | 1.000      |
| 119  | GOBP-LONG_TERM_SYNAPTIC_POTENTIATION                | 12   | 0.315452 | 1.076076 | 0.316993  | 0.889058  | 1.000      |
| 120  | GOBP-DENDRITIC_SPINE_MORPHOGENESIS                  | 5    | 0.442226 | 1.069899 | 0.344444  | 0.899395  | 1.000      |
| 121  | GOBP-POSITIVE_REGULATION_OF_PROTEIN_TYROSINE_K...   | 5    | 0.445783 | 1.068143 | 0.352770  | 0.896931  | 1.000      |
| 122  | GOBP-G_PROTEIN_COUPLED_RECEPTOR_SIGNALING_PATHWAY   | 18   | 0.267645 | 1.066953 | 0.361940  | 0.892892  | 1.000      |
| 123  | GOBP-POSITIVE_REGULATION_OF_PROTEIN_KINASE_ACT...   | 19   | 0.269296 | 1.066930 | 0.309701  | 0.885755  | 1.000      |
| 124  | GOBP-CHEMICAL_HOMEOSTASIS                           | 23   | 0.254702 | 1.064461 | 0.348276  | 0.885741  | 1.000      |
| 125  | GOBP-NEURON_APOPTOTIC_PROCESS                       | 12   | 0.314215 | 1.063549 | 0.338762  | 0.881176  | 1.000      |
| 126  | GOBP-NEGATIVE_REGULATION_OF_TRANSMEMBRANE_TRAN...   | 6    | 0.415659 | 1.062069 | 0.371274  | 0.878158  | 1.000      |

Continuation of Table S15

| NAME                                                  | ID            | SIZE | ES       | NES      | NOM.p.val | FDR.q.val | FWER.p.val |
|-------------------------------------------------------|---------------|------|----------|----------|-----------|-----------|------------|
| 127 GOBP-REGULATION-OF-HYDROLASE-ACTIVITY             | GO-0051336    | 22   | 0.254058 | 1.057424 | 0.364662  | 0.885089  | 1.000      |
| 128 GOBP-SENSORY-ORGAN-DEVELOPMENT                    | GO-0007423    | 8    | 0.352899 | 1.052645 | 0.386997  | 0.892513  | 1.000      |
| 129 GOBP-REGULATION-OF-RESPONSE-TO-STRESS             | GO-0080134    | 19   | 0.264390 | 1.046480 | 0.385185  | 0.902969  | 1.000      |
| 130 GOBP-CELLULAR-RESPONSE-TO-ALCOHOL                 | GO-0097306    | 5    | 0.450355 | 1.045421 | 0.373595  | 0.899036  | 1.000      |
| 131 GOBP-REGULATION-OF-CELL-SIZE                      | GO-0008361    | 5    | 0.433987 | 1.045017 | 0.346253  | 0.893491  | 1.000      |
| 132 GOBP-PEPTIDYL-AMINO-ACID-MODIFICATION             | GO-0018193    | 22   | 0.252041 | 1.042614 | 0.418605  | 0.893309  | 1.000      |
| 133 GOBP-PROTEIN-LOCALIZATION-TO-ORGANELLE            | GO-0033365    | 9    | 0.341772 | 1.036763 | 0.380645  | 0.903611  | 1.000      |
| 134 GOBP-CARBOHYDRATE-HOMEOSTASIS                     | GO-0033500    | 7    | 0.375534 | 1.033026 | 0.400000  | 0.907923  | 1.000      |
| 135 GOBP-NEURON-PROJECTION-GUIDANCE                   | GO-0097485    | 9    | 0.338754 | 1.031171 | 0.381098  | 0.906215  | 1.000      |
| 136 GOBP-RAS-PROTEIN-SIGNAL-TRANSDUCTION              | GO-0007265    | 5    | 0.423330 | 1.030746 | 0.394256  | 0.900849  | 1.000      |
| 137 GOBP-POSITIVE-REGULATION-OF-CELLULAR-COMPONENT... | GO-0051130    | 24   | 0.240645 | 1.028609 | 0.406716  | 0.900403  | 1.000      |
| 138 GOBP-RESPONSE-TO-HEAT                             | GO-0009408    | 7    | 0.359033 | 1.018019 | 0.406332  | 0.923290  | 1.000      |
| 139 GOBP-POSITIVE-REGULATION-OF-DEVELOPMENTAL-GROWTH  | GO-0048639    | 8    | 0.340391 | 1.008511 | 0.414474  | 0.943312  | 1.000      |
| 140 GOBP-POSITIVE-REGULATION-OF-CELLULAR-PROTEIN-L... | GO-1903829    | 7    | 0.358025 | 0.999044 | 0.428962  | 0.964263  | 1.000      |
| 141 GOBP-NEGATIVE-REGULATION-OF-ION-TRANSPORT         | GO-0043271    | 11   | 0.303419 | 0.994393 | 0.442953  | 0.970867  | 1.000      |
| 142 GOBP-METAL-ION-HOMEOSTASIS                        | GO-0055065    | 14   | 0.269796 | 0.987987 | 0.467320  | 0.982499  | 1.000      |
| 143 REACTOME-VESICLE-MEDIATED-TRANSPORT               | R-RNO-5053656 | 5    | 0.407940 | 0.985816 | 0.428177  | 0.981701  | 1.000      |
| 144 GOBP-POSITIVE-REGULATION-OF-DNA-BINDING-TRANSC... | GO-0051091    | 10   | 0.308924 | 0.984774 | 0.440972  | 0.978320  | 1.000      |
| 145 GOBP-POSITIVE-REGULATION-OF-PROTEIN-METABOLIC...  | GO-0051247    | 28   | 0.220289 | 0.982415 | 0.466667  | 0.978120  | 1.000      |
| 146 GOBP-POSITIVE-REGULATION-OF-ION-TRANSPORT         | GO-0043607    | 17   | 0.256037 | 0.978768 | 0.454545  | 0.982328  | 1.000      |
| 147 GOBP-NEGATIVE-REGULATION-OF-SYNAPTIC-TRANSMISSION | GO-0050805    | 6    | 0.378630 | 0.977581 | 0.444759  | 0.978852  | 1.000      |
| 148 REACTOME-TRANSMISSION-ACROSS-CHEMICAL-SYNAPSES    | R-RNO-112315  | 23   | 0.231832 | 0.974077 | 0.513410  | 0.982237  | 1.000      |
| 149 GOBP-DEVELOPMENTAL-CELL-GROWTH                    | GO-0048588    | 5    | 0.410743 | 0.973896 | 0.451351  | 0.976205  | 1.000      |
| 150 GOBP-POSITIVE-REGULATION-OF-SECRETION             | GO-0051047    | 6    | 0.370498 | 0.973735 | 0.498623  | 0.970138  | 1.000      |
| 151 GOBP-POLYSACCHARIDE-METABOLIC-PROCESS             | GO-0005976    | 5    | 0.410612 | 0.972679 | 0.500000  | 0.966567  | 1.000      |
| 152 GOBP-SENSORY-PERCEPTION-OF-PAIN                   | GO-0019233    | 5    | 0.404815 | 0.971314 | 0.452778  | 0.964141  | 1.000      |
| 153 GOBP-NEGATIVE-REGULATION-OF-CELL-DEATH            | GO-0060548    | 22   | 0.235332 | 0.970019 | 0.452632  | 0.961146  | 1.000      |
| 154 GOBP-REGULATION-OF-TRANSPORTER-ACTIVITY           | GO-0032409    | 17   | 0.254705 | 0.969205 | 0.506211  | 0.957279  | 1.000      |
| 155 GOBP-TELENCEPHALON-DEVELOPMENT                    | GO-0021537    | 6    | 0.373313 | 0.968221 | 0.460177  | 0.953511  | 1.000      |
| 156 GOBP-ORGAN-GROWTH                                 | GO-0035265    | 5    | 0.397590 | 0.964999 | 0.488372  | 0.956633  | 1.000      |
| 157 REACTOME-MEMBRANE-TRAFFICKING                     | R-RNO-199991  | 5    | 0.407940 | 0.964058 | 0.479564  | 0.953360  | 1.000      |
| 158 GOBP-RECEPTOR-MEDIATED-ENDOCYTOSIS                | GO-0006898    | 6    | 0.365437 | 0.961877 | 0.513889  | 0.953675  | 1.000      |
| 159 GOBP-HORMONE-TRANSPORT                            | GO-0009914    | 9    | 0.304349 | 0.961550 | 0.469697  | 0.948517  | 1.000      |
| 160 GOBP-NEGATIVE-REGULATION-OF-PHOSPHORYLATION       | GO-0042326    | 7    | 0.335472 | 0.955856 | 0.511299  | 0.957641  | 1.000      |
| 161 GOBP-REGULATION-OF-NEURONAL-SYNAPTIC-PLASTICITY   | GO-0048168    | 7    | 0.345679 | 0.955195 | 0.488372  | 0.953786  | 1.000      |
| 162 GOBP-REGULATION-OF-ORGAN-GROWTH                   | GO-0046620    | 5    | 0.397590 | 0.952337 | 0.510870  | 0.955254  | 1.000      |
| 163 GOBP-REGULATION-OF-PEPTIDYL-TYROSINE-PHOSPHORY... | GO-0050730    | 9    | 0.307995 | 0.948712 | 0.506536  | 0.959750  | 1.000      |
| 164 GOBP-ADENYLATE-CYCLASE-MODULATING-G-PROTEIN-CO... | GO-0007188    | 11   | 0.281481 | 0.948564 | 0.503425  | 0.954287  | 1.000      |
| 165 GOBP-GENERATION-OF-PRECURSOR-METABOLITES-AND-E... | GO-0006091    | 5    | 0.396848 | 0.947667 | 0.491979  | 0.950660  | 1.000      |
| 166 GOBP-POSITIVE-REGULATION-OF-AXONOGENESIS          | GO-0050772    | 5    | 0.385542 | 0.945480 | 0.492837  | 0.950859  | 1.000      |
| 167 GOBP-REGULATION-OF-DEVELOPMENTAL-GROWTH           | GO-0048638    | 9    | 0.297021 | 0.938085 | 0.521173  | 0.964712  | 1.000      |
| 168 GOBP-MITOCHONDRION-ORGANIZATION                   | GO-0007005    | 7    | 0.339085 | 0.937404 | 0.497024  | 0.960953  | 1.000      |
| 169 GOBP-CELL-JUNCTION-ORGANIZATION                   | GO-0034330    | 19   | 0.234019 | 0.934708 | 0.547101  | 0.962515  | 1.000      |

Continuation of Table S15

| NAME | ID                                                | SIZE | ES       | NES      | NOM.p.val | FDR.q.val | FWER.p.val |
|------|---------------------------------------------------|------|----------|----------|-----------|-----------|------------|
| 170  | GOBP-NEGATIVE-REGULATION-OF-LIPID-METABOLIC-PR... | 5    | 0.394411 | 0.934026 | 0.518841  | 0.958576  | 1.000      |
| 171  | GOBP-POSITIVE-REGULATION-OF BINDING               | 6    | 0.355724 | 0.935076 | 0.507246  | 0.955281  | 1.000      |
| 172  | GOBP-POSITIVE-REGULATION-OF LOCOMOTION            | 11   | 0.285560 | 0.932979 | 0.527687  | 0.950026  | 1.000      |
| 173  | GOBP-SMALL-MOLECULE-METABOLIC-PROCESS             | 15   | 0.255727 | 0.932883 | 0.546358  | 0.944808  | 1.000      |
| 174  | GOBP-AMIDE-BIOSYNTHETIC-PROCESS                   | 7    | 0.333333 | 0.932368 | 0.543103  | 0.940606  | 1.000      |
| 175  | GOBP-PEPTIDE-BIOSYNTHETIC-PROCESS                 | 7    | 0.333333 | 0.926905 | 0.498599  | 0.949502  | 1.000      |
| 176  | GOBP-REGULATION-OF-SYNAPTIC-PLASTICITY            | 21   | 0.218710 | 0.925628 | 0.616279  | 0.947459  | 1.000      |
| 177  | GOBP-LONG-TERM-SYNAPTIC-DEPRESSION                | 5    | 0.395899 | 0.924260 | 0.541114  | 0.945615  | 1.000      |
| 178  | GOBP-MUSCLE-CELL-DEVELOPMENT                      | 5    | 0.385542 | 0.915145 | 0.531856  | 0.961820  | 1.000      |
| 179  | GOBP-RESPONSE-TO-CARBOHYDRATE                     | 5    | 0.385542 | 0.913011 | 0.542936  | 0.961964  | 1.000      |
| 180  | GOBP-DEVELOPMENTAL-MATURATION                     | 5    | 0.373494 | 0.908876 | 0.564033  | 0.967152  | 1.000      |
| 181  | GOBP-REGULATION-OF-CYTOSKELETON-ORGANIZATION      | 5    | 0.373494 | 0.907331 | 0.557692  | 0.965531  | 1.000      |
| 182  | GOBP-RESPONSE-TO-MONOSACCHARIDE                   | 5    | 0.385542 | 0.905847 | 0.536458  | 0.963827  | 1.000      |
| 183  | GOBP-APOPTOTIC-PROCESS                            | 35   | 0.193760 | 0.903012 | 0.636752  | 0.965401  | 1.000      |
| 184  | GOBP-CELLULAR-RESPONSE-TO-ORGANIC-CYCLIC-COMPOUND | 13   | 0.253333 | 0.902028 | 0.573333  | 0.962511  | 1.000      |
| 185  | GOBP-MATERNAL-PROCESS-INVOLVED-IN-FEMALE-PREGN... | 5    | 0.360141 | 0.899742 | 0.568783  | 0.963086  | 1.000      |
| 186  | GOBP-POSITIVE-REGULATION-OF-CELL-DEVELOPMENT      | 12   | 0.259269 | 0.899731 | 0.557522  | 0.957958  | 1.000      |
| 187  | GOBP-POSITIVE-REGULATION-OF-NEUROGENESIS          | 12   | 0.259269 | 0.899265 | 0.590361  | 0.953830  | 1.000      |
| 188  | GOBP-POSITIVE-REGULATION-OF-NERVOUS-SYSTEM-DEV... | 12   | 0.259269 | 0.898636 | 0.615132  | 0.950226  | 1.000      |
| 189  | GOBP-REGULATION-OF-NERVOUS-SYSTEM-DEVELOPMENT     | 15   | 0.241474 | 0.898195 | 0.590580  | 0.946213  | 1.000      |
| 190  | GOBP-LOCOMOTORY-BEHAVIOR                          | 7    | 0.318211 | 0.895599 | 0.605341  | 0.947725  | 1.000      |
| 191  | GOBP-ENDOCYTOSIS                                  | 8    | 0.311423 | 0.890978 | 0.579251  | 0.954650  | 1.000      |
| 192  | GOBP-RESPONSE-TO-ALKALOID                         | 5    | 0.367966 | 0.890768 | 0.578947  | 0.950124  | 1.000      |
| 193  | GOBP-NEGATIVE-REGULATION-OF-SIGNALING             | 21   | 0.216297 | 0.887056 | 0.641975  | 0.953204  | 1.000      |
| 194  | GOBP-REGIONALIZATION                              | 6    | 0.347957 | 0.885320 | 0.555556  | 0.952450  | 1.000      |
| 195  | GOBP-CELLULAR-LIPID-METABOLIC-PROCESS             | 7    | 0.315690 | 0.882531 | 0.586826  | 0.954271  | 1.000      |
| 196  | REACTOME-RAS-ACTIVATION-UPON-CA2-INFLUX-THROUG... | 6    | 0.338946 | 0.880258 | 0.603352  | 0.954814  | 1.000      |
| 197  | GOBP-POSITIVE-REGULATION-OF-EPITHELIAL-CELL-MI... | 5    | 0.365226 | 0.877313 | 0.592208  | 0.957150  | 1.000      |
| 198  | REACTOME-TRAFFICKING-OF-AMPA-RECEPTORS            | 11   | 0.266731 | 0.874100 | 0.604027  | 0.959434  | 1.000      |
| 199  | GOBP-TAXIS                                        | 14   | 0.236919 | 0.873412 | 0.649123  | 0.956033  | 1.000      |
| 200  | GOBP-POSITIVE-REGULATION-OF-ESTABLISHMENT-OF-P... | 5    | 0.349398 | 0.862803 | 0.634006  | 0.975384  | 1.000      |
| 201  | GOBP-NEGATIVE-REGULATION-OF-IMMUNE-SYSTEM-PROCESS | 5    | 0.361673 | 0.858712 | 0.601626  | 0.979823  | 1.000      |
| 202  | GOBP-EXOCYTOSIS                                   | 11   | 0.257296 | 0.858165 | 0.665493  | 0.976274  | 1.000      |
| 203  | GOBP-CELL-GROWTH                                  | 10   | 0.269231 | 0.857107 | 0.663664  | 0.974019  | 1.000      |
| 204  | GOBP-PATTERN-SPECIFICATION-PROCESS                | 6    | 0.347957 | 0.855514 | 0.587896  | 0.973106  | 1.000      |
| 205  | GOBP-MONOCARBOXYLIC-ACID-METABOLIC-PROCESS        | 6    | 0.318527 | 0.854511 | 0.625000  | 0.970685  | 1.000      |
| 206  | REACTOME-NEUROTRANSMITTER-RECEPTORS-AND-POSTSY... | 22   | 0.207947 | 0.850462 | 0.752852  | 0.975242  | 1.000      |
| 207  | REACTOME-G-ALPHA1-SIGNALING-EVENTS                | 18   | 0.221461 | 0.850117 | 0.684397  | 0.971298  | 1.000      |
| 208  | GOBP-MYELOID-LEUKOCYTE-ACTIVATION                 | 8    | 0.286177 | 0.846631 | 0.662614  | 0.974352  | 1.000      |
| 209  | GOBP-SEXUAL-REPRODUCTION                          | 10   | 0.269231 | 0.843937 | 0.670554  | 0.975632  | 1.000      |
| 210  | GOBP-MULTICELLULAR-ORGANISMAL-RESPONSE-TO-STRESS  | 5    | 0.350514 | 0.842098 | 0.645946  | 0.975001  | 1.000      |
| 211  | GOBP-REGULATION-OF-PROTEIN-LOCALIZATION           | 18   | 0.212244 | 0.838529 | 0.687747  | 0.978205  | 1.000      |
| 212  | GOBP-RESPONSE-TO-ALCOHOL                          | 11   | 0.252925 | 0.835988 | 0.677419  | 0.978964  | 1.000      |

Continuation of Table S15

|     | NAME                                              | ID            | SIZE | ES       | NES      | NOM.p.val | FDR.q.val | FWER.p.val |
|-----|---------------------------------------------------|---------------|------|----------|----------|-----------|-----------|------------|
| 213 | GOBP-POSITIVE-REGULATION-OF-GROWTH                | GO-0045927    | 9    | 0.270808 | 0.835707 | 0.683386  | 0.974867  | 1.000      |
| 214 | GOBP-ESTABLISHMENT-OF-PROTEIN-LOCALIZATION_TO...  | GO-0072594    | 6    | 0.329268 | 0.835500 | 0.660969  | 0.970988  | 1.000      |
| 215 | GOBP-REGULATION-OF-CELLULAR-PROTEIN-LOCALIZATION  | GO-1903827    | 12   | 0.250000 | 0.83545  | 0.688136  | 0.972744  | 1.000      |
| 216 | GOBP-DEVELOPMENTAL-GROWTH                         | GO-004589     | 10   | 0.258477 | 0.832207 | 0.723810  | 0.968875  | 1.000      |
| 217 | GOBP-CELL-CELL-SIGNALING-BY-WNT                   | GO-0198738    | 7    | 0.296296 | 0.823581 | 0.656151  | 0.981719  | 1.000      |
| 218 | GOBP-NEGATIVE-REGULATION-OF-TRANSPORT             | GO-0051051    | 13   | 0.233166 | 0.822824 | 0.692053  | 0.978871  | 1.000      |
| 219 | GOBP-CARBOHYDRATE-METABOLIC-PROCESS               | GO-0005975    | 9    | 0.265823 | 0.822407 | 0.669697  | 0.975404  | 1.000      |
| 220 | GOBP-EMBRYONIC-MORPHOGENESIS                      | GO-0045898    | 6    | 0.305481 | 0.821845 | 0.647383  | 0.972196  | 1.000      |
| 221 | GOBP-PROTEIN-LOCALIZATION_TO-CELL-PERIPHERY       | GO-1990778    | 12   | 0.230842 | 0.814754 | 0.720000  | 0.983078  | 1.000      |
| 222 | GOBP-NUCLEAR-TRANSPORT                            | GO-0051169    | 5    | 0.337349 | 0.813810 | 0.685792  | 0.980459  | 1.000      |
| 223 | GOBP-IONOTROPIC-GLUTAMATE-RECEPTOR-SIGNALING_P... | GO-0035235    | 9    | 0.267109 | 0.807978 | 0.730897  | 0.988804  | 1.000      |
| 224 | GOBP-REGULATION-OF-ANATOMICAL-STRUCTURE-MORPHO... | GO-0022603    | 17   | 0.209805 | 0.807023 | 0.719425  | 0.986574  | 1.000      |
| 225 | GOBP-REGULATION-OF-PEPTIDE-HORMONE-SECRETION      | GO-0090276    | 6    | 0.308128 | 0.802247 | 0.701705  | 0.991283  | 1.000      |
| 226 | GOBP-GAMETE-GENERATION                            | GO-0007276    | 9    | 0.265823 | 0.801765 | 0.718310  | 0.987654  | 1.000      |
| 227 | GOBP-CELLULAR-HOMEOSTASIS                         | GO-0019725    | 18   | 0.204987 | 0.800822 | 0.756554  | 0.985030  | 1.000      |
| 228 | GOBP-REGULATION-OF-CELLULAR-RESPONSE_TO-STRESS    | GO-0080135    | 9    | 0.260908 | 0.800268 | 0.758730  | 0.981711  | 1.000      |
| 229 | GOBP-PHOSPHATIDYLINOSITOL-3-KINASE-SIGNALING      | GO-0014065    | 7    | 0.291107 | 0.799913 | 0.715100  | 0.978006  | 1.000      |
| 230 | GOBP-NEGATIVE-REGULATION-OF-PROTEOLYSIS           | GO-0045861    | 8    | 0.271355 | 0.793693 | 0.699088  | 0.985918  | 1.000      |
| 231 | GOBP-REGULATION-OF-PEPTIDE-SECRETION              | GO-0002791    | 7    | 0.284243 | 0.792518 | 0.698925  | 0.984037  | 1.000      |
| 232 | GOBP-REGULATION-OF-CELLULAR-LOCALIZATION          | GO-0060341    | 17   | 0.205774 | 0.791055 | 0.773381  | 0.982720  | 1.000      |
| 233 | GOBP-REGULATION-OF-MUSCLE-ADAPTATION              | GO-0043502    | 5    | 0.330002 | 0.790020 | 0.730245  | 0.980536  | 1.000      |
| 234 | GOBP-RESPONSE_TO-ETHANOL                          | GO-0045471    | 5    | 0.333807 | 0.786552 | 0.716180  | 0.983302  | 1.000      |
| 235 | GOBP-REGULATION-OF-CYSTEINE-TYPE-ENDOPEPTIDASE... | GO-2000116    | 9    | 0.248969 | 0.781194 | 0.766355  | 0.989686  | 1.000      |
| 236 | REACTOME-INTERFERON-SIGNALING                     | R-RNO-913531  | 6    | 0.304565 | 0.780894 | 0.692308  | 0.986150  | 1.000      |
| 237 | REACTOME-ASSEMBLY-AND-CELL-SURFACE-PRESENTATIO... | R-RNO-9609736 | 8    | 0.262346 | 0.780622 | 0.715493  | 0.982460  | 1.000      |
| 238 | GOBP-INTRACELLULAR-TRANSPORT                      | GO-0046907    | 11   | 0.233766 | 0.778058 | 0.781759  | 0.983076  | 1.000      |
| 239 | GOBP-NUCLEOBASE-CONTAINING-SMALL-MOLECULE-META... | GO-0055086    | 6    | 0.307594 | 0.776835 | 0.732733  | 0.981080  | 1.000      |
| 240 | GOBP-REGULATION-OF-EPITHELIAL-CELL-MIGRATION      | GO-0010632    | 6    | 0.295882 | 0.774116 | 0.736559  | 0.982007  | 1.000      |
| 241 | GOBP-ESTABLISHMENT-OF-PROTEIN-LOCALIZATION        | GO-0045184    | 18   | 0.195018 | 0.772842 | 0.816254  | 0.980412  | 1.000      |
| 242 | GOBP-NEGATIVE-REGULATION-OF-MOLECULAR-FUNCTION    | GO-0044092    | 24   | 0.181228 | 0.772735 | 0.789272  | 0.976602  | 1.000      |
| 243 | REACTOME-NEGATIVE-REGULATION-OF-NMDA-RECEPTOR...  | R-HSA-961732  | 8    | 0.262346 | 0.771380 | 0.791277  | 0.974756  | 1.000      |
| 244 | GOBP-REGULATION-OF-CELLULAR-COMPONENT_SIZE        | GO-0032535    | 7    | 0.280910 | 0.770440 | 0.749235  | 0.972834  | 1.000      |
| 245 | GOBP-MUSCLE-ADAPTATION                            | GO-0043500    | 5    | 0.330002 | 0.769423 | 0.735135  | 0.970818  | 1.000      |
| 246 | GOBP-REGULATION-OF-PEPTIDASE-ACTIVITY             | GO-0052547    | 10   | 0.244091 | 0.769163 | 0.784257  | 0.967374  | 1.000      |
| 247 | GOBP-REGULATION-OF-NEUROGENESIS                   | GO-0050767    | 14   | 0.209302 | 0.762407 | 0.795775  | 0.975525  | 1.000      |
| 248 | GOBP-TEMPERATURE-HOMEOSTASIS                      | GO-0001659    | 5    | 0.313253 | 0.757283 | 0.752187  | 0.979907  | 1.000      |
| 249 | GOBP-POSITIVE-REGULATION-OF-CELL-DEATH            | GO-0010942    | 19   | 0.185679 | 0.743625 | 0.851406  | 0.999491  | 1.000      |
| 250 | GOBP-REGULATION-OF-DEFENSE-RESPONSE               | GO-0031347    | 7    | 0.262837 | 0.741803 | 0.821429  | 0.998800  | 1.000      |
| 251 | GOBP-ORGANIC-HYDROXY-COMPOUND-METABOLIC-PROCESS   | GO-1901615    | 7    | 0.252259 | 0.739034 | 0.771015  | 0.999180  | 1.000      |
| 252 | GOBP-POSITIVE-REGULATION-OF-ANION-TRANSPORT       | GO-1903793    | 9    | 0.240506 | 0.735512 | 0.844720  | 1.000000  | 1.000      |
| 253 | GOBP-POSTSYNAPSE-ORGANIZATION                     | GO-0099173    | 10   | 0.243590 | 0.735128 | 0.803125  | 0.997910  | 1.000      |
| 254 | GOBP-REGULATION-OF-VESICLE-MEDIATED_TRANSPORT     | GO-0060627    | 12   | 0.209818 | 0.727286 | 0.846875  | 1.000000  | 1.000      |
| 255 | GOBP-REGULATION-OF-CELL-DEVELOPMENT               | GO-0060284    | 15   | 0.201262 | 0.726365 | 0.862295  | 1.000000  | 1.000      |

Continuation of Table S15

| NAME | ID                                                 | SIZE | ES       | NES      | NOM.p.val | FDR.q.val | FWER.p.val |
|------|----------------------------------------------------|------|----------|----------|-----------|-----------|------------|
| 256  | GOBP-EMBRYO-DEVELOPMENT                            | 14   | 0.204587 | 0.725824 | 0.830935  | 1.000000  | 1.000      |
| 257  | GOBP-CELL-MORPHOGENESIS INVOLVED IN NEURON DIFF... | 21   | 0.175457 | 0.720842 | 0.888430  | 1.000000  | 1.000      |
| 258  | GOBP-REGULATION-OF-CELLULAR-COMPONENT-MOVEMENT     | 15   | 0.191562 | 0.715050 | 0.848592  | 1.000000  | 1.000      |
| 259  | GOBP-APOPTOTIC-MITOCHONDRIAL-CHANGES               | 6    | 0.273523 | 0.714223 | 0.849003  | 1.000000  | 1.000      |
| 260  | GOBP-REGULATION-OF-INFLAMMATORY-RESPONSE           | 7    | 0.262837 | 0.713966 | 0.785124  | 1.000000  | 1.000      |
| 261  | GOBP-CELL-MORPHOGENESIS INVOLVED IN DIFFERENTI...  | 21   | 0.175457 | 0.713868 | 0.846715  | 1.000000  | 1.000      |
| 262  | GOBP-NEGATIVE-REGULATION-OF-KINASE-ACTIVITY        | 5    | 0.289044 | 0.709549 | 0.861878  | 1.000000  | 1.000      |
| 263  | GOBP-PROTEIN-LOCALIZATION-TO-PLASMA-MEMBRANE       | 7    | 0.257121 | 0.707852 | 0.871166  | 1.000000  | 1.000      |
| 264  | GOBP-NEGATIVE-REGULATION-OF-INTRACELLULAR-SIGN...  | 7    | 0.261763 | 0.704334 | 0.835294  | 1.000000  | 1.000      |
| 265  | GOBP-DENDRITE-DEVELOPMENT                          | 9    | 0.223438 | 0.699453 | 0.870432  | 1.000000  | 1.000      |
| 266  | GOBP-NEGATIVE-REGULATION-OF-TRANSFERASE-ACTIVITY   | 5    | 0.289044 | 0.694647 | 0.844327  | 1.000000  | 1.000      |
| 267  | GOBP-REGULATION-OF-ORGANELLE-ORGANIZATION          | 14   | 0.200978 | 0.693270 | 0.903448  | 1.000000  | 1.000      |
| 268  | GOBP-MEMBRANE-ORGANIZATION                         | 12   | 0.200978 | 0.692565 | 0.871473  | 1.000000  | 1.000      |
| 269  | REACTOME-DEATH-RECEPTOR-SIGNALING                  | 5    | 0.293522 | 0.690907 | 0.845960  | 1.000000  | 1.000      |
| 270  | GOBP-ADENYLATE-CYCLASE-INHIBITING-G-PROTEIN.CO...  | 9    | 0.222140 | 0.684025 | 0.890282  | 1.000000  | 1.000      |
| 271  | GOBP-PROTEIN-KINASE-B-SIGNALING                    | 6    | 0.257489 | 0.681750 | 0.876081  | 1.000000  | 1.000      |
| 272  | GOBP-FATTY-ACID-TRANSPORT                          | 6    | 0.268396 | 0.681750 | 0.853521  | 1.000000  | 1.000      |
| 273  | GOBP-REGULATION-OF-MAP-KINASE-ACTIVITY             | 9    | 0.214761 | 0.676153 | 0.906832  | 1.000000  | 1.000      |
| 274  | GOBP-REGULATION-OF-PHOSPHATIDYLINOSITOL-3-KINA...  | 6    | 0.256098 | 0.675583 | 0.881720  | 1.000000  | 1.000      |
| 275  | GOBP-CELL-SURFACE-RECEPTOR-SIGNALING-PATHWAY.I...  | 15   | 0.177210 | 0.675576 | 0.924460  | 1.000000  | 1.000      |
| 276  | GOBP-NEGATIVE-REGULATION-OF-APOPTOTIC-SIGNALIN...  | 7    | 0.235976 | 0.670109 | 0.887240  | 1.000000  | 1.000      |
| 277  | GOBP-ANION-TRANSMEMBRANE-TRANSPORT                 | 7    | 0.240082 | 0.663266 | 0.911504  | 1.000000  | 1.000      |
| 278  | GOBP-REGULATION-OF-MUSCLE-CELL-DIFFERENTIATION     | 6    | 0.256098 | 0.662156 | 0.888889  | 1.000000  | 1.000      |
| 279  | GOBP-REGULATION-OF-PROTEIN-LOCALIZATION-TO-CEL...  | 6    | 0.265603 | 0.662001 | 0.898072  | 1.000000  | 1.000      |
| 280  | GOBP-INTRINSIC-APOPTOTIC-SIGNALING-PATHWAY         | 5    | 0.266292 | 0.659204 | 0.887671  | 1.000000  | 1.000      |
| 281  | GOBP-PEPTIDE-METABOLIC-PROCESS                     | 12   | 0.193260 | 0.653903 | 0.914754  | 1.000000  | 1.000      |
| 282  | REACTOME-DISEASES-OF-SIGNAL-TRANSDUCTION-BY-GR...  | 12   | 0.190461 | 0.653163 | 0.906832  | 1.000000  | 1.000      |
| 283  | REACTOME-SYNAPTIC-ADHESION-LIKE-MOLECULES          | 9    | 0.216571 | 0.649236 | 0.900000  | 1.000000  | 1.000      |
| 284  | GOBP-ORGANIC-ACID-TRANSPORT                        | 7    | 0.229544 | 0.646966 | 0.913947  | 1.000000  | 1.000      |
| 285  | GOBP-MALE-GAMETE-GENERATION                        | 5    | 0.258920 | 0.637455 | 0.910053  | 1.000000  | 1.000      |
| 286  | GOBP-REGULATION-OF-PROTEIN-LOCALIZATION-TO-MEM...  | 7    | 0.234568 | 0.632121 | 0.915989  | 1.000000  | 1.000      |
| 287  | GOBP-REGULATION-OF-PEPTIDE-TRANSPORT               | 10   | 0.192271 | 0.627037 | 0.948718  | 1.000000  | 1.000      |
| 288  | GOBP-REGULATION-OF-LIPID-METABOLIC-PROCESS         | 7    | 0.224911 | 0.624483 | 0.933908  | 1.000000  | 1.000      |
| 289  | GOBP-POSITIVE-REGULATION-OF-PHOSPHATIDYLINOSIT...  | 5    | 0.253012 | 0.624423 | 0.951031  | 1.000000  | 1.000      |
| 290  | GOBP-REGULATION-OF-CELL-CYCLE-PROCESS              | 5    | 0.253012 | 0.616766 | 0.936464  | 1.000000  | 1.000      |
| 291  | GOBP-POSITIVE-REGULATION-OF-SMOOTH-MUSCLE-CELL...  | 5    | 0.249521 | 0.613950 | 0.931579  | 1.000000  | 1.000      |
| 292  | GOBP-CELLULAR-GLUCOSE-HOMEOSTASIS                  | 5    | 0.253012 | 0.610753 | 0.943978  | 1.000000  | 1.000      |
| 293  | GOBP-CHEMICAL-SYNAPTIC-TRANSMISSION-POSTSYNAPTIC   | 9    | 0.198286 | 0.608456 | 0.962428  | 1.000000  | 1.000      |
| 294  | GOBP-CELLULAR-CARBOHYDRATE-METABOLIC-PROCESS       | 5    | 0.253012 | 0.599794 | 0.939726  | 1.000000  | 1.000      |
| 295  | GOBP-PROTEIN-DEPHOSPHORYLATION                     | 7    | 0.214328 | 0.593257 | 0.965714  | 1.000000  | 1.000      |
| 296  | GOBP-NEGATIVE-REGULATION-OF-HYDROLASE-ACTIVITY     | 11   | 0.179643 | 0.586794 | 0.938710  | 1.000000  | 1.000      |
| 297  | GOBP-DEPHOSPHORYLATION                             | 7    | 0.214328 | 0.583958 | 0.946429  | 1.000000  | 1.000      |
| 298  | GOBP-EMBRYO-DEVELOPMENT-ENDING-IN-BIRTH-OR-EGG...  | 9    | 0.186571 | 0.576436 | 0.964602  | 1.000000  | 1.000      |

Continuation of Table S15

|     | NAME                                              | ID            | SIZE | ES        | NES       | NOM.p.val | FDR.q.val | FWER.p.val |
|-----|---------------------------------------------------|---------------|------|-----------|-----------|-----------|-----------|------------|
| 299 | GOBP-EMBRYONIC-ORGAN-DEVELOPMENT                  | GO-0048568    | 7    | 0.203897  | 0.573003  | 0.985955  | 1.000000  | 1.000      |
| 300 | GOBP-NEGATIVE-REGULATION-OF-ANION-TRANSPORT       | GO-1903792    | 8    | 0.195135  | 0.572101  | 0.977654  | 1.000000  | 1.000      |
| 301 | GOBP-IN-UTERO-EMBRYONIC-DEVELOPMENT               | GO-0001701    | 8    | 0.196000  | 0.570899  | 0.959877  | 1.000000  | 1.000      |
| 302 | GOBP-NEURON-MIGRATION                             | GO-0001764    | 5    | 0.232317  | 0.558362  | 0.983146  | 1.000000  | 1.000      |
| 303 | REACTOME-L1CAM-INTERACTIONS                       | R-RNO-373760  | 5    | 0.228916  | 0.555463  | 0.975207  | 1.000000  | 1.000      |
| 304 | GOBP-ORGANONITROGEN-COMPOUND-BIOSYNTHETIC-PROCESS | GO-1901566    | 13   | 0.160000  | 0.550076  | 0.980645  | 0.999474  | 1.000      |
| 305 | GOBP-POSITIVE-REGULATION-OF-PROTEOLYSIS           | GO-0045862    | 8    | 0.188316  | 0.545840  | 0.982301  | 0.997882  | 1.000      |
| 306 | GOBP-OSSIFICATION                                 | GO-0001503    | 9    | 0.173241  | 0.539555  | 0.985673  | 0.996778  | 1.000      |
| 307 | GOBP-EXTRINSIC-APOPTOTIC-SIGNALING-PATHWAY        | GO-0097191    | 7    | 0.192200  | 0.527174  | 0.981651  | 0.997181  | 1.000      |
| 308 | GOBP-STRIPATED-MUSCLE-CELL-DIFFERENTIATION        | GO-0051146    | 9    | 0.167890  | 0.520091  | 0.984849  | 0.995529  | 1.000      |
| 309 | GOBP-EPITHELIAL-CELL-DIFFERENTIATION              | GO-0030855    | 7    | 0.172840  | 0.479206  | 0.993711  | 0.999106  | 1.000      |
| 310 | GOBP-REGULATION-OF-SMALL-MOLECULE-METABOLIC-PR... | GO-0062012    | 9    | 0.161147  | 0.475423  | 0.990683  | 0.996274  | 1.000      |
| 311 | GOBP-CALCIUM-MEDIATED-SIGNALING                   | GO-0019722    | 10   | -0.141026 | -0.383831 | 1.000000  | 0.999366  | 1.000      |
| 312 | GOBP-MUSCLE-CELL-DIFFERENTIATION                  | GO-0042692    | 10   | -0.153846 | -0.422492 | 0.997054  | 1.000000  | 1.000      |
| 313 | GOBP-NEGATIVE-REGULATION-OF-DEVELOPMENTAL-PROCESS | GO-0051093    | 13   | -0.155610 | -0.454574 | 0.993026  | 0.999088  | 1.000      |
| 314 | GOBP-NEGATIVE-REGULATION-OF-CELL-DIFFERENTIATION  | GO-0045596    | 13   | -0.155610 | -0.455983 | 0.985975  | 1.000000  | 1.000      |
| 315 | REACTOME-PROTEIN-PROTEIN-INTERACTIONS-AT-SYNAPSES | R-RNO-6794362 | 12   | -0.163838 | -0.473252 | 0.988795  | 1.000000  | 1.000      |
| 316 | GOBP-NEGATIVE-REGULATION-OF-CELLULAR-COMPONENT... | GO-0051129    | 11   | -0.170382 | -0.479859 | 0.982353  | 1.000000  | 1.000      |
| 317 | GOBP-LIPID-EXPORT-FROM-CELL                       | GO-0140353    | 5    | -0.225316 | -0.484504 | 0.984472  | 1.000000  | 1.000      |
| 318 | GOBP-MAINTENANCE-OF-LOCATION                      | GO-0051235    | 7    | -0.207377 | -0.500630 | 0.970326  | 1.000000  | 1.000      |
| 319 | GOBP-RESPONSE-TO-PEPTIDE                          | GO-1901652    | 18   | -0.158643 | -0.507489 | 0.984148  | 1.000000  | 1.000      |
| 320 | GOBP-REGULATION-OF-ANION-TRANSPORT                | GO-0044070    | 20   | -0.154479 | -0.508653 | 0.983193  | 1.000000  | 1.000      |
| 321 | REACTOME-EPHLEPHRIN-SIGNALING                     | R-RNO-2682334 | 6    | -0.220944 | -0.515362 | 0.979719  | 1.000000  | 1.000      |
| 322 | GOBP-REGULATION-OF-CELLULAR-AMIDE-METABOLIC-PR... | GO-0034248    | 9    | -0.199357 | -0.517716 | 0.976574  | 1.000000  | 1.000      |
| 323 | GOBP-NEGATIVE-REGULATION-OF-CELL-DEVELOPMENT      | GO-0010721    | 6    | -0.227567 | -0.525068 | 0.982732  | 1.000000  | 1.000      |
| 324 | GOBP-NEGATIVE-REGULATION-OF-NERVOUS-SYSTEM.DEV... | GO-0051961    | 5    | -0.249492 | -0.538065 | 0.981337  | 1.000000  | 1.000      |
| 325 | GOBP-CELLULAR-RESPONSE-TO-NITROGEN-COMPOUND       | GO-1901699    | 20   | -0.161836 | -0.538748 | 0.960396  | 1.000000  | 1.000      |
| 326 | GOBP-REGULATION-OF-CARBOHYDRATE-BIOSYNTHETIC-P... | GO-0043255    | 5    | -0.255061 | -0.545114 | 0.972561  | 1.000000  | 1.000      |
| 327 | GOBP-REGULATION-OF-CARBOHYDRATE-METABOLIC-PROCESS | GO-0006109    | 5    | -0.255061 | -0.549076 | 0.970874  | 1.000000  | 1.000      |
| 328 | REACTOME-PTEN-REGULATION                          | R-RNO-6807070 | 5    | -0.252572 | -0.550394 | 0.979133  | 1.000000  | 1.000      |
| 329 | GOBP-REGULATION-OF-RECEPTOR-MEDIATED-ENDOCYTOSIS  | GO-0048259    | 5    | -0.254355 | -0.552087 | 0.976708  | 1.000000  | 1.000      |
| 330 | GOBP-CARBOHYDRATE-BIOSYNTHETIC-PROCESS            | GO-0016051    | 5    | -0.255061 | -0.553159 | 0.958194  | 1.000000  | 1.000      |
| 331 | GOBP-VESICLE-MEDIATED-TRANSPORT-IN-SYNAPSE        | GO-0099003    | 7    | -0.227890 | -0.554455 | 0.961821  | 1.000000  | 1.000      |
| 332 | GOBP-CALCIUM-ION-TRANSPORT                        | GO-0006816    | 11   | -0.198673 | -0.555909 | 0.953587  | 1.000000  | 1.000      |
| 333 | GOBP-METAL-ION-TRANSPORT                          | GO-0030001    | 11   | -0.198673 | -0.556515 | 0.960584  | 1.000000  | 1.000      |
| 334 | REACTOME-POST-TRANSLATIONAL-PROTEIN-MODIFICATION  | R-RNO-597592  | 7    | -0.232667 | -0.560671 | 0.957227  | 1.000000  | 1.000      |
| 335 | GOBP-MULTICELLULAR-ORGANISM-REPRODUCTION          | GO-0032504    | 12   | -0.195390 | -0.563693 | 0.954802  | 1.000000  | 1.000      |
| 336 | GOBP-REGULATION-OF-HORMONE-SECRETION              | GO-0046883    | 8    | -0.219294 | -0.570924 | 0.958841  | 1.000000  | 1.000      |
| 337 | GOBP-POSITIVE-REGULATION-OF-PEPTIDASE-ACTIVITY    | GO-0010952    | 7    | -0.234846 | -0.571187 | 0.957252  | 1.000000  | 1.000      |
| 338 | GOBP-CELLULAR-COMPONENT-MAINTENANCE               | GO-0043954    | 5    | -0.261672 | -0.573965 | 0.958730  | 1.000000  | 1.000      |
| 339 | REACTOME-NERVOUS-SYSTEM-DEVELOPMENT               | R-RNO-9675108 | 15   | -0.187591 | -0.575109 | 0.963432  | 1.000000  | 1.000      |
| 340 | GOBP-POSITIVE-REGULATION-OF-CYSTEINE-TYPE-ENDO... | GO-2001056    | 7    | -0.234846 | -0.577513 | 0.945227  | 1.000000  | 1.000      |
| 341 | GOBP-AMINO-ACID-TRANSPORT                         | GO-0008685    | 6    | -0.251394 | -0.577904 | 0.957317  | 1.000000  | 1.000      |



Continuation of Table S15

|     | NAME                                              | ID            | SIZE | ES        | NES       | NOM.p.val | FDR.q.val | FWER.p.val |
|-----|---------------------------------------------------|---------------|------|-----------|-----------|-----------|-----------|------------|
| 342 | GOBP-CARBOXYLIC-ACID-TRANSPORT                    | GO-0046942    | 6    | -0.251394 | -0.580232 | 0.940092  | 1.000000  | 1.000      |
| 343 | GOBP-GROWTH                                       | GO-0040007    | 14   | -0.192353 | -0.580407 | 0.960469  | 1.000000  | 1.000      |
| 344 | GOBP-MAPK-CASCADE                                 | GO-0000165    | 18   | -0.181914 | -0.580996 | 0.954240  | 1.000000  | 1.000      |
| 345 | GOBP-ORGANIC-ANION-TRANSPORT                      | GO-0015711    | 6    | -0.251394 | -0.590596 | 0.946792  | 1.000000  | 1.000      |
| 346 | GOBP-CELLULAR-RESPONSE-TO-ABIOTIC-STIMULUS        | GO-0071214    | 7    | -0.245403 | -0.591865 | 0.946237  | 1.000000  | 1.000      |
| 347 | GOBP-REGULATION-OF-ENDOTHELIAL-CELL-MIGRATION     | GO-0010594    | 5    | -0.269864 | -0.594629 | 0.949765  | 1.000000  | 1.000      |
| 348 | GOBP-LEUKOCYTE-MEDIATED-IMMUNITY                  | GO-0002443    | 7    | -0.239585 | -0.596431 | 0.940549  | 1.000000  | 1.000      |
| 349 | GOBP-POSTTRANSCRIPTIONAL-REGULATION-OF_GENE.EX... | GO-0010608    | 8    | -0.238569 | -0.600247 | 0.937879  | 1.000000  | 1.000      |
| 350 | GOBP-LIPID-METABOLIC-PROCESS                      | GO-0006629    | 10   | -0.219572 | -0.602721 | 0.925501  | 1.000000  | 1.000      |
| 351 | GOBP-REGULATION-OF-ENDOCYTOSIS                    | GO-0030100    | 6    | -0.260772 | -0.604509 | 0.934959  | 1.000000  | 1.000      |
| 352 | GOBP-MONOAMINE-TRANSPORT                          | GO-0015844    | 5    | -0.279081 | -0.609293 | 0.921753  | 1.000000  | 1.000      |
| 353 | GOBP-MYOTUBE-DIFFERENTIATION                      | GO-0014902    | 5    | -0.278270 | -0.609567 | 0.928105  | 1.000000  | 1.000      |
| 354 | GOBP-NEGATIVE-REGULATION-OF-CELL-PROJECTION.OR... | GO-0031345    | 5    | -0.272993 | -0.610160 | 0.948136  | 1.000000  | 1.000      |
| 355 | GOBP-PURINE-CONTAINING-COMPOUND-METABOLIC-PROCESS | GO-0072521    | 5    | -0.282557 | -0.614695 | 0.918712  | 1.000000  | 1.000      |
| 356 | GOBP-NEGATIVE-REGULATION-OF-CATABOLIC-PROCESS     | GO-0009895    | 8    | -0.245632 | -0.620396 | 0.906793  | 1.000000  | 1.000      |
| 357 | GOBP-NEGATIVE-REGULATION-OF-PHOSPHORUS-METABOL... | GO-0010563    | 9    | -0.236030 | -0.624501 | 0.922628  | 1.000000  | 1.000      |
| 358 | GOBP-REGULATION-OF-BINDING                        | GO-0051098    | 11   | -0.222590 | -0.624824 | 0.896652  | 1.000000  | 1.000      |
| 359 | GOBP-RESPONSE-TO-NUTRIENT                         | GO-0007584    | 5    | -0.293930 | -0.627922 | 0.924194  | 1.000000  | 1.000      |
| 360 | REACTOME-DEVELOPMENTAL-BIOLOGY                    | R-RNO-1266738 | 23   | -0.186103 | -0.631221 | 0.924528  | 1.000000  | 1.000      |
| 361 | GOBP-RESPONSE-TO-TEMPERATURE-STIMULUS             | GO-0009266    | 9    | -0.241522 | -0.632063 | 0.891655  | 1.000000  | 1.000      |
| 362 | GOBP-CELLULAR-AMIDE-METABOLIC-PROCESS             | GO-0043603    | 13   | -0.214767 | -0.632609 | 0.914454  | 1.000000  | 1.000      |
| 363 | GOBP-REGULATION-OF-NERVOUS-SYSTEM-PROCESS         | GO-0031644    | 8    | -0.242875 | -0.632875 | 0.905488  | 1.000000  | 1.000      |
| 364 | GOBP-PROTEIN-AUTOPHOSPHORYLATION                  | GO-0046777    | 5    | -0.293641 | -0.641719 | 0.908082  | 1.000000  | 1.000      |
| 365 | GOBP-CELLULAR-RESPONSE-TO-DNA-DAMAGE-STIMULUS     | GO-0006974    | 5    | -0.299925 | -0.643431 | 0.914242  | 1.000000  | 1.000      |
| 366 | GOBP-HOMEOSTATIC-PROCESS                          | GO-0042592    | 31   | -0.177620 | -0.643605 | 0.916880  | 1.000000  | 1.000      |
| 367 | GOBP-EPHRIIN-RECEPTOR-SIGNALING-PATHWAY           | GO-0048013    | 5    | -0.299163 | -0.645748 | 0.894737  | 1.000000  | 1.000      |
| 368 | GOBP-REGULATION-OF-MAPK-CASCADE                   | GO-0043408    | 13   | -0.220998 | -0.652356 | 0.899713  | 1.000000  | 1.000      |
| 369 | GOBP-POSITIVE-REGULATION-OF-ORGANELLE-ORGANIZA... | GO-0010638    | 10   | -0.239262 | -0.652751 | 0.893275  | 1.000000  | 1.000      |
| 370 | GOBP-DICARBOXYLIC-ACID-TRANSPORT                  | GO-0006835    | 5    | -0.301410 | -0.654380 | 0.895223  | 1.000000  | 1.000      |
| 371 | GOBP-MONOCARBOXYLIC-ACID-TRANSPORT                | GO-0015718    | 5    | -0.301410 | -0.655807 | 0.887439  | 1.000000  | 1.000      |
| 372 | GOBP-ACIDIC-AMINO-ACID-TRANSPORT                  | GO-0015800    | 5    | -0.301410 | -0.656609 | 0.906396  | 1.000000  | 1.000      |
| 373 | GOBP-REGULATION-OF-GROWTH                         | GO-0040008    | 13   | -0.228395 | -0.659025 | 0.877874  | 1.000000  | 1.000      |
| 374 | GOBP-POSITIVE-REGULATION-OF_SMALL-MOLECULE-MET... | GO-0062013    | 5    | -0.304800 | -0.661614 | 0.879365  | 1.000000  | 1.000      |
| 375 | GOBP-T-CELL-ACTIVATION                            | GO-0042110    | 8    | -0.260073 | -0.666083 | 0.870343  | 1.000000  | 1.000      |
| 376 | GOBP-DEVELOPMENTAL-PROCESS-INVOLVED-IN-REPRODU... | GO-0003006    | 11   | -0.236683 | -0.667634 | 0.869048  | 1.000000  | 1.000      |
| 377 | GOBP-OSTEOBLAST-DIFFERENTIATION                   | GO-0001649    | 5    | -0.308052 | -0.668621 | 0.882927  | 1.000000  | 1.000      |
| 378 | GOBP-POSITIVE-REGULATION-OF_GENE-EXPRESSION       | GO-0010628    | 16   | -0.212132 | -0.669254 | 0.889037  | 1.000000  | 1.000      |
| 379 | GOBP-CELL-MIGRATION                               | GO-0016477    | 22   | -0.202540 | -0.678299 | 0.878415  | 1.000000  | 1.000      |
| 380 | GOBP-CELL-ACTIVATION-INVOLVED-IN-IMMUNE-RESPONSE  | GO-0002263    | 6    | -0.296951 | -0.682961 | 0.873846  | 1.000000  | 1.000      |
| 381 | GOBP-REGULATION-OF-MITOTIC-CELL-CYCLE             | GO-0007346    | 5    | -0.318508 | -0.683943 | 0.872441  | 1.000000  | 1.000      |
| 382 | GOBP-MULTICELLULAR-ORGANISMAL-HOMEOSTASIS         | GO-0048871    | 12   | -0.231107 | -0.684411 | 0.861386  | 1.000000  | 1.000      |
| 383 | GOBP-REPRODUCTION                                 | GO-0000003    | 18   | -0.213401 | -0.686385 | 0.878492  | 1.000000  | 1.000      |
| 384 | GOBP-SECRETION                                    | GO-0046903    | 24   | -0.200204 | -0.688006 | 0.841379  | 1.000000  | 1.000      |

Continuation of Table S15

|     | NAME                                              | ID            | SIZE | ES        | NES       | NOM.p.val | FDR.q.val | FWER.p.val |
|-----|---------------------------------------------------|---------------|------|-----------|-----------|-----------|-----------|------------|
| 385 | REACTOME_NEUTROPHIL_DEGRANULATION                 | R-RNO-6798695 | 6    | -0.296951 | -0.688892 | 0.842788  | 1.000000  | 1.000      |
| 386 | GOBP_MYELOID_LEUKOCYTE_MEDIATED_IMMUNITY          | GO-0002444    | 6    | -0.296951 | -0.688918 | 0.840874  | 1.000000  | 1.000      |
| 387 | GOBP_NEGATIVE_REGULATION_OF_PROTEIN_METABOLIC...  | GO-0051248    | 20   | -0.206313 | -0.689445 | 0.860846  | 1.000000  | 1.000      |
| 388 | GOBP_INORGANIC_ION_TRANSMEMBRANE_TRANSPORT        | GO-0098660    | 9    | -0.259364 | -0.694213 | 0.848440  | 1.000000  | 1.000      |
| 389 | GOBP_PROTEIN_CONTAINING_COMPLEX_SUBUNIT_ORGANI... | GO-0043933    | 14   | -0.237787 | -0.696493 | 0.852113  | 1.000000  | 1.000      |
| 390 | REACTOME_CELL_CYCLE_MITOTIC                       | R-RNO-69278   | 5    | -0.321875 | -0.697897 | 0.825954  | 1.000000  | 1.000      |
| 391 | GOBP_ACTIVATION_OF_MAPK_ACTIVITY                  | GO-0000187    | 6    | -0.304350 | -0.700099 | 0.847962  | 1.000000  | 1.000      |
| 392 | GOBP_PHAGOCYTOSIS                                 | GO-0006909    | 5    | -0.319697 | -0.701582 | 0.835404  | 1.000000  | 1.000      |
| 393 | REACTOME_MAPK_FAMILY_SIGNALING_CASCADES           | R-RNO-5983057 | 12   | -0.241086 | -0.702155 | 0.848617  | 1.000000  | 1.000      |
| 394 | GOBP_NEGATIVE_REGULATION_OF_RESPONSE_TO_STIMULUS  | GO-0048585    | 16   | -0.226152 | -0.702886 | 0.858921  | 1.000000  | 1.000      |
| 395 | REACTOME_NEURONAL_SYSTEM                          | R-RNO-112316  | 26   | -0.197839 | -0.706650 | 0.853175  | 1.000000  | 1.000      |
| 396 | GOBP_POSITIVE_REGULATION_OF_MAP_KINASE_ACTIVITY   | GO-0043406    | 6    | -0.304350 | -0.710201 | 0.829630  | 1.000000  | 1.000      |
| 397 | GOBP_POSITIVE_REGULATION_OF_DEFENSE_RESPONSE      | GO-0031349    | 5    | -0.322895 | -0.711115 | 0.844828  | 1.000000  | 1.000      |
| 398 | GOBP_CELL_JUNCTION_ASSEMBLY                       | GO-0034329    | 8    | -0.283964 | -0.712001 | 0.828006  | 1.000000  | 1.000      |
| 399 | GOBP_REGULATION_OF_PROTEOLYSIS                    | GO-0030162    | 12   | -0.249696 | -0.715038 | 0.839763  | 1.000000  | 1.000      |
| 400 | REACTOME_SIGNALING_BY_NTRKS                       | R-RNO-166520  | 18   | -0.223378 | -0.715060 | 0.820690  | 1.000000  | 1.000      |
| 401 | GOBP_REGULATION_OF_LIPID_BIOSYNTHETIC_PROCESS     | GO-0046890    | 6    | -0.315189 | -0.715415 | 0.828869  | 1.000000  | 1.000      |
| 402 | GOBP_GLIAL_CELL_DIFFERENTIATION                   | GO-0010001    | 10   | -0.258211 | -0.715725 | 0.857576  | 1.000000  | 1.000      |
| 403 | GOBP_POSITIVE_REGULATION_OF_MULTICELLULAR_ORGA... | GO-0051240    | 32   | -0.198697 | -0.717295 | 0.844208  | 1.000000  | 1.000      |
| 404 | REACTOME_OPIOID_SIGNALING                         | R-RNO-111885  | 17   | -0.253079 | -0.719531 | 0.829662  | 1.000000  | 1.000      |
| 405 | GOBP_GLAND_DEVELOPMENT                            | GO-0048732    | 7    | -0.297555 | -0.727632 | 0.796043  | 1.000000  | 1.000      |
| 406 | GOBP_REGULATION_OF_LIPID_LOCALIZATION             | GO-1905952    | 5    | -0.332818 | -0.728137 | 0.830745  | 1.000000  | 1.000      |
| 407 | REACTOME_CREB1_PHOSPHORYLATION_THROUGH_NMDA_RE... | R-RNO-442742  | 8    | -0.284086 | -0.730558 | 0.823976  | 1.000000  | 1.000      |
| 408 | GOBP_ADENYLATE_CYCLASE_INHIBITING_G_PROTEIN_CO... | GO-0007196    | 5    | -0.332218 | -0.730829 | 0.816746  | 1.000000  | 1.000      |
| 409 | GOBP_LIPID_BIOSYNTHETIC_PROCESS                   | GO-0008610    | 6    | -0.315189 | -0.731892 | 0.818325  | 1.000000  | 1.000      |
| 410 | GOBP_ORGANIC_ACID_METABOLIC_PROCESS               | GO-0006082    | 7    | -0.297588 | -0.732509 | 0.796712  | 1.000000  | 1.000      |
| 411 | GOBP_CARDIAC_MUSCLE_TISSUE_DEVELOPMENT            | GO-0048738    | 6    | -0.321305 | -0.734381 | 0.777778  | 1.000000  | 1.000      |
| 412 | GOBP_GLUTAMATE_RECEPTOR_SIGNALING_PATHWAY         | GO-0007215    | 17   | -0.230791 | -0.735311 | 0.797844  | 1.000000  | 1.000      |
| 413 | GOBP_NEGATIVE_REGULATION_OF_LOCOMOTION            | GO-0040013    | 5    | -0.334751 | -0.735552 | 0.796825  | 1.000000  | 1.000      |
| 414 | GOBP_ERK1_AND_ERK2_CASCADE                        | GO-0070371    | 5    | -0.337477 | -0.736978 | 0.799051  | 1.000000  | 1.000      |
| 415 | GOBP_ENDOCRINE_SYSTEM_DEVELOPMENT                 | GO-0035270    | 6    | -0.316227 | -0.737751 | 0.801964  | 1.000000  | 1.000      |
| 416 | GOBP_HEART_DEVELOPMENT                            | GO-0007507    | 6    | -0.321305 | -0.738306 | 0.794643  | 1.000000  | 1.000      |
| 417 | GOBP_ANIMAL_ORGAN_MORPHOGENESIS                   | GO-0009887    | 12   | -0.254598 | -0.738699 | 0.802038  | 1.000000  | 1.000      |
| 418 | GOBP_REGULATION_OF_LYMPHOCYTE_ACTIVATION          | GO-0051249    | 5    | -0.346482 | -0.742661 | 0.797488  | 1.000000  | 1.000      |
| 419 | REACTOME_CELL_CYCLE                               | R-RNO-1640170 | 6    | -0.324282 | -0.747242 | 0.789147  | 1.000000  | 1.000      |
| 420 | GOBP_NEURON_DEATH                                 | GO-0070997    | 18   | -0.230725 | -0.748150 | 0.816804  | 1.000000  | 1.000      |
| 421 | GOBP_SIGNAL_RELEASE                               | GO-0023061    | 14   | -0.248176 | -0.754013 | 0.801688  | 1.000000  | 1.000      |
| 422 | GOBP_GLIOGENESIS                                  | GO-0042063    | 12   | -0.261970 | -0.756692 | 0.775298  | 1.000000  | 1.000      |
| 423 | GOBP_REGULATION_OF_APOPTOTIC_SIGNALING_PATHWAY    | GO-2001233    | 10   | -0.275270 | -0.758591 | 0.777941  | 1.000000  | 1.000      |
| 424 | GOBP_LIPID_LOCALIZATION                           | GO-0010876    | 10   | -0.279097 | -0.762122 | 0.754491  | 1.000000  | 1.000      |
| 425 | GOBP_REGULATION_OF_PROTEIN_SERINE_THREONINE_KI... | GO-0071900    | 12   | -0.267358 | -0.762288 | 0.767544  | 1.000000  | 1.000      |
| 426 | GOBP_LYMPHOCYTE_ACTIVATION                        | GO-0046649    | 9    | -0.293889 | -0.764905 | 0.761905  | 1.000000  | 1.000      |
| 427 | GOBP_GLUCOSE_METABOLIC_PROCESS                    | GO-0006006    | 6    | -0.335603 | -0.765267 | 0.755385  | 1.000000  | 1.000      |

Continuation of Table S15

| NAME                                                  | ID            | SIZE | ES        | NES       | NOM.p.val | FDR.q.val | FWER.p.val |
|-------------------------------------------------------|---------------|------|-----------|-----------|-----------|-----------|------------|
| 428 REACTOME-GPCR-LIGAND-BINDING                      | R-RNO-500792  | 8    | -0.300888 | -0.770134 | 0.769120  | 1.000000  | 1.000      |
| 429 REACTOME-SIGNALING-BY_GPCR                        | R-RNO-372790  | 22   | -0.225838 | -0.772090 | 0.782967  | 1.000000  | 1.000      |
| 430 GOBP-MONOSACCHARIDE-METABOLIC-PROCESS             | GO-0005996    | 6    | -0.335603 | -0.772918 | 0.725962  | 1.000000  | 1.000      |
| 431 GOBP-REGULATION_OF_DNA-BINDING_TRANSCRIPTION.F... | GO-0051090    | 16   | -0.250585 | -0.775492 | 0.762500  | 1.000000  | 1.000      |
| 432 GOBP-CIRCULATORY_SYSTEM-PROCESS                   | GO-0003013    | 5    | -0.356138 | -0.780847 | 0.775157  | 1.000000  | 1.000      |
| 433 GOBP-REGULATION_OF_CELL-DEATH                     | GO-0010941    | 34   | -0.213025 | -0.784339 | 0.760052  | 1.000000  | 1.000      |
| 434 GOBP-REGULATION_OF_FAT-CELL-DIFFERENTIATION       | GO-0045598    | 6    | -0.339784 | -0.785009 | 0.752252  | 1.000000  | 1.000      |
| 435 GOBP-RESPONSE_TO_TUMOR-NECROSIS-FACTOR            | GO-0034612    | 7    | -0.324557 | -0.785861 | 0.754123  | 1.000000  | 1.000      |
| 436 REACTOME-EXTRA_NUCLEAR-ESTROGEN-SIGNALING         | R-RNO-9009391 | 7    | -0.318658 | -0.786100 | 0.748126  | 1.000000  | 1.000      |
| 437 REACTOME-EXTRA-CELLULAR-MATRIX-ORGANIZATION       | R-RNO-1474244 | 5    | -0.363523 | -0.790234 | 0.755556  | 1.000000  | 1.000      |
| 438 GOBP-REGULATION_OF-PROTEIN-BINDING                | GO-0043393    | 7    | -0.329582 | -0.790254 | 0.734158  | 1.000000  | 1.000      |
| 439 GOBP-RESPONSE_TO_NITROGEN-COMPOUND                | GO-1901698    | 34   | -0.216616 | -0.790364 | 0.750639  | 1.000000  | 1.000      |
| 440 REACTOME-INTEGRATION_OF-ENERGY-METABOLISM         | R-RNO-163685  | 5    | -0.366499 | -0.791501 | 0.730645  | 1.000000  | 1.000      |
| 441 GOBP-RESPONSE_TO_UV                               | GO-0009411    | 5    | -0.363129 | -0.792886 | 0.741486  | 1.000000  | 1.000      |
| 442 GOBP-RESPONSE_TO-ENDOGENOUS-STIMULUS              | GO-0009719    | 34   | -0.217058 | -0.799391 | 0.735369  | 1.000000  | 1.000      |
| 443 GOBP-REGULATION_OF_CELL-DIFFERENTIATION           | GO-0045595    | 36   | -0.219299 | -0.800329 | 0.747736  | 1.000000  | 1.000      |
| 444 GOBP-REGULATION_OF-EXTRINSIC-APOPTOTIC-SIGNAL...  | GO-2001236    | 6    | -0.351206 | -0.805878 | 0.738583  | 1.000000  | 1.000      |
| 445 GOBP-REGULATION_OF-CELLULAR-CATABOLIC-PROCESS     | GO-0031329    | 10   | -0.290981 | -0.808215 | 0.724812  | 1.000000  | 1.000      |
| 446 GOBP-REGULATION_OF-SYSTEM-PROCESS                 | GO-0044057    | 18   | -0.245200 | -0.808749 | 0.704708  | 1.000000  | 1.000      |
| 447 GOBP-POSITIVE-REGULATION_OF-PROTEIN-SERINE-THR... | GO-0071902    | 9    | -0.304207 | -0.810455 | 0.732169  | 1.000000  | 1.000      |
| 448 GOBP-REGULATION_OF-SECRETION                      | GO-0051046    | 14   | -0.265804 | -0.810918 | 0.701556  | 1.000000  | 1.000      |
| 449 GOBP-PROTEIN-LOCALIZATION_TO-MEMBRANE             | GO-0071667    | 14   | -0.264422 | -0.812529 | 0.709632  | 1.000000  | 1.000      |
| 450 GOBP-REGULATION_OF-METAL-ION-TRANSPORT            | GO-0010959    | 6    | -0.347358 | -0.812577 | 0.701219  | 1.000000  | 1.000      |
| 451 GOBP-AMEBOIDAL-TYPE-CELL-MIGRATION                | GO-0001667    | 11   | -0.292051 | -0.816310 | 0.679831  | 1.000000  | 1.000      |
| 452 GOBP-MUSCLE-CELL-PROLIFERATION                    | GO-0033002    | 8    | -0.326586 | -0.817419 | 0.702128  | 1.000000  | 1.000      |
| 453 GOBP-IMMUNE-EFFECTOR-PROCESS                      | GO-0002252    | 10   | -0.299667 | -0.819964 | 0.708029  | 1.000000  | 1.000      |
| 454 GOBP-TISSUE-MIGRATION                             | GO-0090130    | 9    | -0.315495 | -0.822786 | 0.700752  | 1.000000  | 1.000      |
| 455 GOBP-FORBRAIN-DEVELOPMENT                         | GO-0030900    | 9    | -0.312941 | -0.825249 | 0.710526  | 1.000000  | 1.000      |
| 456 GOBP-LEUKOCYTE-CELL-CELL-ADHESION                 | GO-0007159    | 6    | -0.360315 | -0.829140 | 0.689441  | 1.000000  | 1.000      |
| 457 GOBP-CIRCADIAN-REGULATION_OF-GENE-EXPRESSION      | GO-0032922    | 5    | -0.377575 | -0.834692 | 0.672000  | 1.000000  | 1.000      |
| 458 GOBP-RESPONSE_TO-INSULIN                          | GO-0032868    | 5    | -0.387578 | -0.834944 | 0.713141  | 1.000000  | 1.000      |
| 459 GOBP-EPIDERMIS-DEVELOPMENT                        | GO-0008544    | 5    | -0.375858 | -0.835332 | 0.698113  | 1.000000  | 1.000      |
| 460 GOBP-REGULATION_OF-WNT-SIGNALING-PATHWAY          | GO-0030111    | 5    | -0.389317 | -0.836626 | 0.697205  | 1.000000  | 1.000      |
| 461 GOBP-REGULATION_OF-NEUROTRANSMITTER-TRANSPORT     | GO-0051588    | 6    | -0.370947 | -0.846788 | 0.677019  | 1.000000  | 1.000      |
| 462 GOBP-REGULATION_OF-ANATOMICAL-STRUCTURE-SIZE      | GO-0090066    | 10   | -0.307604 | -0.847605 | 0.668175  | 1.000000  | 1.000      |
| 463 REACTOME-SIGNALING-BY-RECEPTOR-TYROSINE-KINASES   | R-RNO-9006934 | 26   | -0.243280 | -0.848284 | 0.682561  | 1.000000  | 1.000      |
| 464 GOBP-APOPTOTIC-SIGNALING-PATHWAY                  | GO-0097190    | 15   | -0.277939 | -0.853598 | 0.662393  | 1.000000  | 1.000      |
| 465 GOBP-RESPIRATORY-SYSTEM-DEVELOPMENT               | GO-0060541    | 6    | -0.371669 | -0.858307 | 0.655763  | 1.000000  | 1.000      |
| 466 GOBP-POSITIVE-REGULATION_OF-INTRACELLULAR-SIGN... | GO-1902533    | 14   | -0.287822 | -0.860357 | 0.643994  | 1.000000  | 1.000      |
| 467 GOBP-HOMEOSTASIS-OF-NUMBER_OF-CELLS               | GO-0048872    | 5    | -0.394862 | -0.860543 | 0.649612  | 1.000000  | 1.000      |
| 468 GOBP-LOCOMOTION                                   | GO-0040011    | 31   | -0.243054 | -0.863587 | 0.671018  | 1.000000  | 1.000      |
| 469 GOBP-REGULATION_OF-VASCULATURE-DEVELOPMENT        | GO-1901342    | 5    | -0.396738 | -0.864099 | 0.662903  | 1.000000  | 1.000      |
| 470 GOBP-NEGATIVE-REGULATION_OF-PROTEIN-MODIFICATI... | GO-0031400    | 10   | -0.320006 | -0.865652 | 0.645926  | 1.000000  | 1.000      |

Continuation of Table S15

|     | NAME                                              | ID            | SIZE | ES        | NES       | NOM.p.val | FDR.q.val | FWER.p.val |
|-----|---------------------------------------------------|---------------|------|-----------|-----------|-----------|-----------|------------|
| 471 | GOBP-PROTEOLYSIS                                  | GO-0006508    | 17   | -0.277090 | -0.873182 | 0.609929  | 1.000000  | 1.000      |
| 472 | GOBP-CELLULAR_RESPONSE.TO.PEPTIDE                 | GO-1901653    | 13   | -0.295253 | -0.874776 | 0.617111  | 1.000000  | 1.000      |
| 473 | GOBP-NEGATIVE-REGULATION-OF-CELL-POPULATION.PR... | GO-0008285    | 9    | -0.333921 | -0.875372 | 0.622419  | 1.000000  | 1.000      |
| 474 | GOBP-MULTI-ORGANISM-PROCESS                       | GO-0051704    | 16   | -0.284382 | -0.877456 | 0.629477  | 1.000000  | 1.000      |
| 475 | REACTOME-TRAFFICKING-OF-GLUR2-CONTAINING-AMPA-... | R-RNO-416993  | 8    | -0.341685 | -0.879027 | 0.628866  | 1.000000  | 1.000      |
| 476 | GOBP-POSITIVE-REGULATION-OF-CELL-CELL-ADHESION    | GO-0022409    | 5    | -0.406004 | -0.879239 | 0.654664  | 1.000000  | 1.000      |
| 477 | HALLMARK-ALLOGRAFT-REJECTION                      | M5950         | 7    | -0.360129 | -0.879627 | 0.627871  | 1.000000  | 1.000      |
| 478 | GOBP-REGULATION-OF-CELLULAR-COMPONENT-BIOGENESIS  | GO-0044087    | 10   | -0.315922 | -0.879857 | 0.611026  | 1.000000  | 1.000      |
| 479 | GOBP-POSITIVE-REGULATION-OF-LEUKOCYTE-CELL-CEL... | GO-1903039    | 5    | -0.406004 | -0.884296 | 0.618012  | 1.000000  | 1.000      |
| 480 | GOBP-NEUROTRANSMITTER-SECRETION                   | GO-0007269    | 6    | -0.381670 | -0.885794 | 0.634969  | 1.000000  | 1.000      |
| 481 | GOBP-POSITIVE-REGULATION-OF-MAPK-CASCADE          | GO-00043410   | 9    | -0.338713 | -0.896571 | 0.589260  | 1.000000  | 1.000      |
| 482 | GOBP-LEARNING                                     | GO-0007612    | 13   | -0.313048 | -0.901216 | 0.585366  | 1.000000  | 1.000      |
| 483 | GOBP-RESPONSE-TO-OXYGEN-CONTAINING-COMPOUND       | GO-1901700    | 39   | -0.236732 | -0.901216 | 0.590377  | 1.000000  | 1.000      |
| 484 | GOBP-CELL-ACTIVATION                              | GO-0001775    | 21   | -0.273791 | -0.906303 | 0.586486  | 1.000000  | 1.000      |
| 485 | REACTOME-ESTROGEN-DEPENDENT-NUCLEAR-EVENTS.DOW... | R-RNO-9634638 | 5    | -0.413713 | -0.906913 | 0.601926  | 1.000000  | 1.000      |
| 486 | GOBP-CELLULAR-RESPONSE-TO-LIPID                   | GO-0071396    | 15   | -0.291263 | -0.910595 | 0.587021  | 1.000000  | 1.000      |
| 487 | GOBP-SECOND-MESSENGER-MEDIATED-SIGNALING          | GO-0019932    | 16   | -0.287964 | -0.910788 | 0.559441  | 1.000000  | 1.000      |
| 488 | GOBP-MUSCLE-STRUCTURE-DEVELOPMENT                 | GO-0061061    | 16   | -0.296298 | -0.915626 | 0.558533  | 1.000000  | 1.000      |
| 489 | GOBP-MITOTIC-CELL-CYCLE                           | GO-0000278    | 10   | -0.338358 | -0.918131 | 0.589443  | 1.000000  | 1.000      |
| 490 | REACTOME-DAG-AND-JP3-SIGNALING                    | R-RNO-1489509 | 8    | -0.375960 | -0.918524 | 0.570370  | 1.000000  | 1.000      |
| 491 | GOBP-POSITIVE-REGULATION-OF-RESPONSE-TO-EXTERN... | GO-0032103    | 9    | -0.344439 | -0.927152 | 0.545727  | 1.000000  | 1.000      |
| 492 | GOBP-HEAD-DEVELOPMENT                             | GO-0060322    | 22   | -0.277441 | -0.927152 | 0.539095  | 1.000000  | 1.000      |
| 493 | GOBP-DEFENSE-RESPONSE-TO-OTHER-ORGANISM           | GO-0098542    | 9    | -0.350618 | -0.930056 | 0.582335  | 1.000000  | 1.000      |
| 494 | GOBP-CELLULAR-COMPONENT-DISASSEMBLY               | GO-0023411    | 6    | -0.402313 | -0.937126 | 0.551669  | 0.997346  | 1.000      |
| 495 | GOBP-POSITIVE-REGULATION-OF-IMMUNE-RESPONSE       | GO-0050778    | 9    | -0.357252 | -0.938338 | 0.558209  | 0.998924  | 1.000      |
| 496 | GOBP-ANATOMICAL-STRUCTURE-HOMEOSTASIS             | GO-0060249    | 7    | -0.380477 | -0.939679 | 0.549467  | 1.000000  | 1.000      |
| 497 | GOBP-MULTI-MULTICELLULAR-ORGANISM-PROCESS         | GO-0044706    | 8    | -0.370361 | -0.940234 | 0.517804  | 1.000000  | 1.000      |
| 498 | GOBP-REGULATION-OF-MULTICELLULAR-ORGANISMAL-DE... | GO-2000026    | 31   | -0.264240 | -0.941307 | 0.540365  | 1.000000  | 1.000      |
| 499 | GOBP-ORGANIC-HYDROXY-COMPOUND-TRANSPORT           | GO-0015850    | 6    | -0.400176 | -0.941840 | 0.543307  | 1.000000  | 1.000      |
| 500 | REACTOME-INTERLEUKIN-4-AND-INTERLEUKIN-13-SIGN... | R-RNO-6785807 | 8    | -0.378643 | -0.944547 | 0.533626  | 1.000000  | 1.000      |
| 501 | GOBP-PROTEIN-COMPLEX-OLIGOMERIZATION              | GO-0051259    | 6    | -0.407538 | -0.945818 | 0.556904  | 1.000000  | 1.000      |
| 502 | GOBP-REGULATION-OF-PROTEIN-CATABOLIC-PROCESS      | GO-0042176    | 7    | -0.381075 | -0.945906 | 0.519637  | 1.000000  | 1.000      |
| 503 | GOBP-ENDOTHELIAL-CELL-PROLIFERATION               | GO-0001935    | 8    | -0.376708 | -0.946219 | 0.524540  | 1.000000  | 1.000      |
| 504 | GOBP-RESPONSE-TO-PEPTIDE-HORMONE                  | GO-0043434    | 13   | -0.317643 | -0.946855 | 0.533898  | 1.000000  | 1.000      |
| 505 | GOBP-ACTIVATION-OF-IMMUNE-RESPONSE                | GO-0002253    | 5    | -0.428592 | -0.948476 | 0.541411  | 1.000000  | 1.000      |
| 506 | GOBP-FAT-CELL-DIFFERENTIATION                     | GO-0045444    | 9    | -0.362500 | -0.949317 | 0.563798  | 1.000000  | 1.000      |
| 507 | GOBP-REGULATION-OF-GTPASE-ACTIVITY                | GO-0043087    | 5    | -0.436050 | -0.950546 | 0.540582  | 1.000000  | 1.000      |
| 508 | GOBP-IMPORT-INTO-CELL                             | GO-0098657    | 6    | -0.420317 | -0.950650 | 0.565149  | 1.000000  | 1.000      |
| 509 | GOBP-ENDOTHELIAL-CELL-MIGRATION                   | GO-0043542    | 8    | -0.377033 | -0.952699 | 0.523006  | 1.000000  | 1.000      |
| 510 | GOBP-ENDOMEMBRANE-SYSTEM-ORGANIZATION             | GO-0010256    | 6    | -0.403745 | -0.953531 | 0.541213  | 1.000000  | 1.000      |
| 511 | GOBP-REGULATION-OF-PROTEIN-STABILITY              | GO-0031647    | 5    | -0.437451 | -0.953783 | 0.545598  | 1.000000  | 1.000      |
| 512 | GOBP-BLOOD-VESSEL-ENDOTHELIAL-CELL-MIGRATION      | GO-0043534    | 8    | -0.377053 | -0.958857 | 0.532012  | 1.000000  | 1.000      |
| 513 | GOBP-SKELETAL-MUSCLE-ORGAN-DEVELOPMENT            | GO-0060538    | 5    | -0.439272 | -0.967618 | 0.510870  | 1.000000  | 1.000      |

Continuation of Table S15

|     | NAME                                              | ID            | SIZE | ES        | NES       | NOM.p.val | FDR.q.val | FWER.p.val |
|-----|---------------------------------------------------|---------------|------|-----------|-----------|-----------|-----------|------------|
| 514 | GOBP-NEGATIVE-REGULATION-OF-GENE-EXPRESSION       | GO-0010629    | 12   | -0.339042 | -0.971567 | 0.489362  | 1.000000  | 1.000      |
| 515 | REACTOME-CLASS-C.3-METABOTROPIC-GLUTAMATE-PHER... | R-RNO-420499  | 7    | -0.407264 | -0.973462 | 0.510736  | 1.000000  | 1.000      |
| 516 | GOBP-RESPONSE-TO-ABIOTIC-STIMULUS                 | GO-0009628    | 27   | -0.274885 | -0.975755 | 0.503320  | 1.000000  | 1.000      |
| 517 | GOBP-POSITIVE-REGULATION-OF-CELLULAR-COMPONENT... | GO-0044089    | 9    | -0.370638 | -0.976899 | 0.489943  | 1.000000  | 1.000      |
| 518 | REACTOME-INTRACELLULAR-SIGNALING-BY-SECOND-MES... | R-RNO-9006925 | 15   | -0.323305 | -0.979541 | 0.485836  | 1.000000  | 1.000      |
| 519 | GOBP-ACTIN-FILAMENT-BASED-PROCESS                 | GO-0030029    | 7    | -0.402114 | -0.979852 | 0.513514  | 1.000000  | 1.000      |
| 520 | GOBP-PROTEIN-LOCALIZATION-TO-SYNAPSE              | GO-0035418    | 5    | -0.457618 | -0.980945 | 0.529687  | 1.000000  | 1.000      |
| 521 | GOBP-POSITIVE-REGULATION-OF-CELL-POPULATION-PR... | GO-0008284    | 21   | -0.290149 | -0.982022 | 0.491252  | 1.000000  | 1.000      |
| 522 | HALLMARK-EPITHELIAL-MESENCHYMAL-TRANSITION        | M5930         | 5    | -0.454135 | -0.984350 | 0.477707  | 1.000000  | 1.000      |
| 523 | GOBP-SMOOTH-MUSCLE-CELL-PROLIFERATION             | GO-0048659    | 6    | -0.419735 | -0.985087 | 0.507042  | 1.000000  | 1.000      |
| 524 | GOBP-SPROUTING-ANGIOGENESIS                       | GO-0002040    | 5    | -0.457282 | -0.986906 | 0.505017  | 1.000000  | 1.000      |
| 525 | GOBP-CELLULAR-RESPONSE-TO-OXYGEN-CONTAINING-CO... | GO-1901701    | 29   | -0.274257 | -0.987229 | 0.471910  | 1.000000  | 1.000      |
| 526 | GOBP-RESPONSE-TO-WOUNDING                         | GO-0009611    | 15   | -0.333577 | -0.992935 | 0.484286  | 1.000000  | 1.000      |
| 527 | GOBP-PROTEIN-LOCALIZATION-TO-POSTSYNAPSE          | GO-0062237    | 5    | -0.457618 | -0.994452 | 0.477419  | 1.000000  | 1.000      |
| 528 | GOBP-CENTRAL-NERVOUS-SYSTEM-DEVELOPMENT           | GO-0007417    | 26   | -0.281200 | -0.997138 | 0.454301  | 1.000000  | 1.000      |
| 529 | GOBP-REGULATION-OF-CELL-ACTIVATION                | GO-0050865    | 8    | -0.396144 | -1.001272 | 0.465569  | 1.000000  | 1.000      |
| 530 | GOBP-BIOLOGICAL-ADHESION                          | GO-0022610    | 19   | -0.308483 | -1.002934 | 0.464088  | 1.000000  | 1.000      |
| 531 | GOBP-REGULATION-OF-GLIOGENESIS                    | GO-0014013    | 5    | -0.459194 | -1.003377 | 0.474441  | 1.000000  | 1.000      |
| 532 | GOBP-CALCIUM-ION-TRANSMEMBRANE-TRANSPORT          | GO-0070588    | 7    | -0.413700 | -1.003565 | 0.471842  | 1.000000  | 1.000      |
| 533 | GOBP-MUSCLE-TISSUE-DEVELOPMENT                    | GO-0060537    | 11   | -0.354671 | -1.004038 | 0.450581  | 1.000000  | 1.000      |
| 534 | REACTOME-G-PROTEIN-MEDIATED-EVENTS                | R-RNO-112040  | 9    | -0.380591 | -1.005494 | 0.485673  | 1.000000  | 1.000      |
| 535 | REACTOME-NEUREXINS-AND-NEUROLIGINS                | R-RNO-6794361 | 9    | -0.383585 | -1.006864 | 0.453102  | 1.000000  | 1.000      |
| 536 | GOBP-POSITIVE-REGULATION-OF-GLIOGENESIS           | GO-0014015    | 5    | -0.459194 | -1.007796 | 0.455975  | 1.000000  | 1.000      |
| 537 | REACTOME-TRANSCRIPTIONAL-REGULATION-OF-WHITE-A... | R-RNO-381340  | 6    | -0.426829 | -1.008355 | 0.451163  | 1.000000  | 1.000      |
| 538 | GOBP-CALCIUM-ION-TRANSPORT-INTO-CYTOSOL           | GO-0060402    | 7    | -0.413700 | -1.009157 | 0.455752  | 1.000000  | 1.000      |
| 539 | G...                                              | GO-0007216    | 8    | -0.390362 | -1.009738 | 0.457143  | 1.000000  | 1.000      |
| 540 | GOBP-CYTOSOLIC-CALCIUM-ION-TRANSPORT              | GO-0060401    | 7    | -0.413700 | -1.010712 | 0.470229  | 1.000000  | 1.000      |
| 541 | REACTOME-CA-DEPENDENT-EVENTS                      | R-RNO-111996  | 8    | -0.394839 | -1.013624 | 0.445802  | 1.000000  | 1.000      |
| 542 | GOBP-REGULATION-OF-MUSCLE-SYSTEM-PROCESS          | GO-0090257    | 8    | -0.398763 | -1.016763 | 0.482655  | 1.000000  | 1.000      |
| 543 | GOBP-MUSCLE-SYSTEM-PROCESS                        | GO-0003012    | 9    | -0.386318 | -1.019082 | 0.448680  | 1.000000  | 1.000      |
| 544 | GOBP-REPRODUCTIVE-SYSTEM-DEVELOPMENT              | GO-0061458    | 6    | -0.445970 | -1.019978 | 0.440367  | 1.000000  | 1.000      |
| 545 | GOBP-CELL-CYCLE-PROCESS                           | GO-0022402    | 11   | -0.365200 | -1.022490 | 0.429178  | 1.000000  | 1.000      |
| 546 | GOBP-RESPONSE-TO-STARVATION                       | GO-0042594    | 5    | -0.475357 | -1.033415 | 0.419558  | 1.000000  | 1.000      |
| 547 | GOBP-INNATE-IMMUNE-RESPONSE                       | GO-0045087    | 7    | -0.427049 | -1.035124 | 0.431517  | 1.000000  | 1.000      |
| 548 | GOBP-EPITHELIAL-CELL-PROLIFERATION                | GO-0050673    | 12   | -0.359808 | -1.039745 | 0.424965  | 1.000000  | 1.000      |
| 549 | GOBP-CELLULAR-RESPONSE-TO-STARVATION              | GO-0009267    | 5    | -0.473537 | -1.042028 | 0.406400  | 1.000000  | 1.000      |
| 550 | GOBP-MUSCLE-CONTRACTION                           | GO-0006936    | 5    | -0.497188 | -1.048822 | 0.402174  | 1.000000  | 1.000      |
| 551 | GOBP-DNA-METABOLIC-PROCESS                        | GO-0006259    | 6    | -0.452777 | -1.050817 | 0.417533  | 0.986631  | 1.000      |
| 552 | GOBP-NEGATIVE-REGULATION-OF-BINDING               | GO-0051100    | 6    | -0.447037 | -1.053793 | 0.441221  | 0.983605  | 1.000      |
| 553 | GOBP-RESPONSE-TO-OXYGEN-LEVELS                    | GO-0070482    | 8    | -0.414000 | -1.059415 | 0.409836  | 0.972756  | 1.000      |
| 554 | GOBP-AMYLOID-PRECURSOR-PROTEIN-METABOLIC-PROCESS  | GO-0042982    | 5    | -0.492010 | -1.060547 | 0.388060  | 0.975387  | 1.000      |
| 555 | GOBP-REGULATION-OF-OSTEOCLAST-DIFFERENTIATION     | GO-0045670    | 5    | -0.492541 | -1.063147 | 0.404025  | 0.973855  | 1.000      |
| 556 | GOBP-RESPONSE-TO-ORGANIC-CYCLIC-COMPOUND          | GO-0014070    | 20   | -0.319441 | -1.064552 | 0.392351  | 0.975593  | 1.000      |

Continuation of Table S15

| NAME                                                  | ID            | SIZE | ES        | NES       | NOM.p.val | FDR.q.val | FWER.p.val |
|-------------------------------------------------------|---------------|------|-----------|-----------|-----------|-----------|------------|
| 557 GOBP-AMYLOID-BETA-METABOLIC-PROCESS               | GO-0050435    | 5    | -0.492010 | -1.064621 | 0.415000  | 0.981502  | 1.000      |
| 558 GOBP-PROTEIN-MODIFICATION-BY-SMALL-PROTEIN-CON... | GO-0032446    | 6    | -0.456732 | -1.069884 | 0.383915  | 0.971669  | 1.000      |
| 559 GOBP-AMYLOID-PRECURSOR-PROTEIN-CATABOLIC-PROCESS  | GO-0042987    | 5    | -0.492010 | -1.070152 | 0.396923  | 0.977022  | 1.000      |
| 560 REACTOME-ESR-MEDIATED-SIGNALING                   | R-RNO-8939211 | 8    | -0.426994 | -1.072066 | 0.376190  | 0.977608  | 1.000      |
| 561 GOBP-CELL-CELL-ADHESION                           | GO-0098609    | 14   | -0.363485 | -1.074994 | 0.379404  | 0.974460  | 1.000      |
| 562 GOBP-INTRACELLULAR-PROTEIN-TRANSPORT              | GO-0006886    | 9    | -0.399135 | -1.075824 | 0.380466  | 0.978055  | 1.000      |
| 563 GOBP-EXCITATORY-CHEMICAL-SYNAPTIC-TRANSMISSION    | GO-0098976    | 5    | -0.491521 | -1.077748 | 0.395899  | 0.978250  | 1.000      |
| 564 GOBP-REGULATION-OF-RESPONSE-TO-EXTERNAL-STIMULUS  | GO-0032101    | 15   | -0.356463 | -1.085414 | 0.370739  | 0.960645  | 1.000      |
| 565 GOBP-PROTEIN-LOCALIZATION-TO-CELL-JUNCTION        | GO-1902414    | 6    | -0.474984 | -1.088023 | 0.355385  | 0.958550  | 1.000      |
| 566 GOBP-RESPONSE-TO-NICOTINE                         | GO-0035094    | 7    | -0.456882 | -1.089531 | 0.366771  | 0.960144  | 1.000      |
| 567 GOBP-VASCULATURE-DEVELOPMENT                      | GO-0001944    | 17   | -0.343906 | -1.089783 | 0.347709  | 0.965642  | 1.000      |
| 568 GOBP-RESPONSE-TO-KETONE                           | GO-1901654    | 7    | -0.454154 | -1.089983 | 0.368343  | 0.971484  | 1.000      |
| 569 REACTOME-PLATELET-ACTIVATION-SIGNALING-AND-AGG... | R-HSA-76002   | 7    | -0.450459 | -1.100777 | 0.348367  | 0.944502  | 1.000      |
| 570 GOBP-REGULATION-OF-CATABOLIC-PROCESS              | GO-0009894    | 13   | -0.372462 | -1.100988 | 0.349138  | 0.950167  | 1.000      |
| 571 REACTOME-SIGNALING-BY-NUCLEAR-RECEPTORS           | R-RNO-9006931 | 8    | -0.426994 | -1.104251 | 0.365152  | 0.946103  | 1.000      |
| 572 GOBP-ASSOCIATIVE-LEARNING                         | GO-0008306    | 7    | -0.454096 | -1.110026 | 0.340062  | 0.934589  | 1.000      |
| 573 GOBP-WOUND-HEALING                                | GO-0042060    | 13   | -0.381623 | -1.114408 | 0.319502  | 0.927445  | 1.000      |
| 574 GOBP-RESPONSE-TO-GROWTH-FACTOR                    | GO-0070848    | 18   | -0.338391 | -1.115007 | 0.330111  | 0.931911  | 1.000      |
| 575 GOBP-POSITIVE-REGULATION-OF-CELL-ADHESION         | GO-0045785    | 7    | -0.459129 | -1.123231 | 0.322239  | 0.912577  | 1.000      |
| 576 GOBP-CYTOSKELETON-ORGANIZATION                    | GO-0007010    | 11   | -0.394125 | -1.124160 | 0.315407  | 0.916161  | 1.000      |
| 577 GOBP-RESPONSE-TO-HORMONE                          | GO-0009725    | 20   | -0.342029 | -1.126390 | 0.308921  | 0.915289  | 1.000      |
| 578 GOBP-ENZYME-LINKED-RECEPTOR-PROTEIN-SIGNALING.... | GO-0007167    | 24   | -0.320712 | -1.127490 | 0.323529  | 0.918189  | 1.000      |
| 579 GOBP-EPIHELIAL-DEVELOPMENT                        | GO-0060429    | 15   | -0.365037 | -1.130119 | 0.304721  | 0.916337  | 1.000      |
| 580 GOBP-NEGATIVE-REGULATION-OF-MULTICELLULAR-ORGA... | GO-0051241    | 15   | -0.370502 | -1.132096 | 0.310830  | 0.916429  | 1.000      |
| 581 GOBP-PROTEIN-CATABOLIC-PROCESS                    | GO-0030163    | 8    | -0.444902 | -1.132385 | 0.327354  | 0.922130  | 1.000      |
| 582 GOBP-POSITIVE-REGULATION-OF-DEVELOPMENTAL-PROCESS | GO-0051094    | 32   | -0.314084 | -1.134654 | 0.297789  | 0.921511  | 1.000      |
| 583 REACTOME-CYTOKINE-SIGNALING-IN-IMMUNE-SYSTEM      | R-RNO-1280215 | 21   | -0.335608 | -1.135350 | 0.309917  | 0.926036  | 1.000      |
| 584 GOBP-REGULATION-OF-CELL-ADHESION                  | GO-0030155    | 13   | -0.388785 | -1.138985 | 0.326180  | 0.920555  | 1.000      |
| 585 GOBP-CELL-CELL-JUNCTION-ASSEMBLY                  | GO-0007043    | 5    | -0.524304 | -1.140321 | 0.314103  | 0.923106  | 1.000      |
| 586 GOBP-CIRCULATORY-SYSTEM-DEVELOPMENT               | GO-0072359    | 21   | -0.344811 | -1.140686 | 0.294430  | 0.928942  | 1.000      |
| 587 GOBP-NEGATIVE-REGULATION-OF-TRANSCRIPTION-BY-R... | GO-0000122    | 10   | -0.425685 | -1.140895 | 0.298422  | 0.935235  | 1.000      |
| 588 REACTOME-G-ALPHA-Z-SIGNALING-EVENTS               | R-RNO-418597  | 5    | -0.518144 | -1.142769 | 0.281834  | 0.935980  | 1.000      |
| 589 GOBP-REGULATION-OF-VASCULAR-ASSOCIATED-SMOOTH...  | GO-1904705    | 5    | -0.510798 | -1.143030 | 0.304478  | 0.942366  | 1.000      |
| 590 GOBP-CELLULAR-RESPONSE-TO-CADMIUM-ION             | GO-0071276    | 5    | -0.515070 | -1.143813 | 0.309562  | 0.946963  | 1.000      |
| 591 GOBP-POSITIVE-REGULATION-OF-NEURON-DEATH          | GO-1901216    | 5    | -0.523392 | -1.145828 | 0.301858  | 0.947563  | 1.000      |
| 592 GOBP-BLOOD-VESSEL-MORPHOGENESIS                   | GO-0048514    | 14   | -0.386338 | -1.152489 | 0.278184  | 0.932296  | 1.000      |
| 593 GOBP-RESPONSE-TO-METAL-ION                        | GO-0010038    | 15   | -0.378169 | -1.152804 | 0.292887  | 0.938324  | 1.000      |
| 594 GOBP-CELLULAR-RESPONSE-TO-PEPTIDE-HORMONE-STIM... | GO-0071375    | 9    | -0.437952 | -1.160068 | 0.306092  | 0.920952  | 1.000      |
| 595 GOBP-CELLULAR-RESPONSE-TO-MOLECULE-OF-BACTERIA... | GO-0071219    | 8    | -0.457646 | -1.167378 | 0.274032  | 0.903951  | 1.000      |
| 596 GOBP-POSITIVE-REGULATION-OF-CELL-DIFFERENTIATION  | GO-0045597    | 27   | -0.331392 | -1.171701 | 0.237838  | 0.896409  | 1.000      |
| 597 REACTOME-ADAPTIVE-IMMUNE-SYSTEM                   | R-RNO-1280218 | 9    | -0.448359 | -1.171790 | 0.253776  | 0.903447  | 1.000      |
| 598 GOBP-RESPONSE-TO-INORGANIC-SUBSTANCE              | GO-0010035    | 19   | -0.359472 | -1.175542 | 0.267956  | 0.898297  | 1.000      |
| 599 GOBP-POSITIVE-REGULATION-OF-EPITHELIAL-CELL-PR... | GO-0050679    | 7    | -0.477754 | -1.176447 | 0.272162  | 0.902646  | 1.000      |

Continuation of Table S15

| NAME | ID                                                | SIZE | ES        | NES       | NOM.p.val | FDR.q.val | FWER.p.val |
|------|---------------------------------------------------|------|-----------|-----------|-----------|-----------|------------|
| 600  | GOBP-CELLULAR-RESPONSE-TO-BIOTIC-STIMULUS         | 8    | -0.457646 | -1.182256 | 0.282090  | 0.890172  | 1.000      |
| 601  | GOBP-RESPONSE-TO-EXTRACELLULAR-STIMULUS           | 13   | -0.401407 | -1.182627 | 0.255618  | 0.896368  | 1.000      |
| 602  | GOBP-NEUROTRANSMITTER-TRANSPORT                   | 7    | -0.487949 | -1.184139 | 0.266667  | 0.898454  | 1.000      |
| 603  | REACTOME-INFECTIOUS-DISEASE                       | 13   | -0.402949 | -1.186614 | 0.262272  | 0.897612  | 1.000      |
| 604  | GOBP-REGULATION-OF-CIRCADIAN-RHYTHM               | 7    | -0.485345 | -1.187146 | 0.267584  | 0.903607  | 1.000      |
| 605  | GOBP-ANATOMICAL-STRUCTURE-FORMATION-INVOLVED.I... | 20   | -0.356987 | -1.189714 | 0.251058  | 0.901997  | 1.000      |
| 606  | GOBP-CYTOTKINE-MEDIATED-SIGNALING-PATHWAY         | 16   | -0.382404 | -1.195623 | 0.247326  | 0.889620  | 1.000      |
| 607  | GOBP-POSITIVE-REGULATION-OF-ENDOTHELIAL-CELL-P... | 6    | -0.518302 | -1.198118 | 0.239940  | 0.888312  | 1.000      |
| 608  | REACTOME-CIRCADIAN-CLOCK                          | 5    | -0.558157 | -1.198494 | 0.230047  | 0.895175  | 1.000      |
| 609  | GOBP-REGULATION-OF-NEUROTRANSMITTER-LEVELS        | 7    | -0.487949 | -1.207694 | 0.241641  | 0.871023  | 1.000      |
| 610  | GOBP-CELLULAR-RESPONSE-TO-EXTERNAL-STIMULUS       | 10   | -0.438739 | -1.209200 | 0.233859  | 0.873588  | 1.000      |
| 611  | REACTOME-LEISHMANIA-INFECTION                     | 10   | -0.444701 | -1.211175 | 0.244868  | 0.874624  | 1.000      |
| 612  | GOBP-PROTEIN-MODIFICATION-BY-SMALL-PROTEIN-CON... | 7    | -0.502210 | -1.212991 | 0.242613  | 0.875561  | 1.000      |
| 613  | HALLMARK-UV-RESPONSE-UP                           | 5    | -0.555993 | -1.213373 | 0.218354  | 0.883537  | 1.000      |
| 614  | GOBP-MONONUCLEAR-CELL-DIFFERENTIATION             | 7    | -0.504386 | -1.217453 | 0.230089  | 0.877573  | 1.000      |
| 615  | REACTOME-SIGNALING-BY-INTERLEUKINS                | 15   | -0.394507 | -1.225899 | 0.220630  | 0.855973  | 1.000      |
| 616  | GOBP-RESPONSE-TO-ACID-CHEMICAL                    | 6    | -0.523940 | -1.228774 | 0.205970  | 0.854344  | 1.000      |
| 617  | GOBP-RESPONSE-TO-LIGHT-STIMULUS                   | 11   | -0.445851 | -1.231855 | 0.206442  | 0.851560  | 1.000      |
| 618  | REACTOME-RHO-GTPASE-EFFECTORS                     | 9    | -0.467014 | -1.233821 | 0.204748  | 0.852782  | 1.000      |
| 619  | GOBP-CELLULAR-RESPONSE-TO-CHEMICAL-STRESS         | 7    | -0.517462 | -1.235686 | 0.229970  | 0.854351  | 1.000      |
| 620  | GOBP-TUBE-DEVELOPMENT                             | 18   | -0.376918 | -1.236840 | 0.208564  | 0.858781  | 1.000      |
| 621  | GOBP-MEMBRANE-PROTEIN-PROTEOLYSIS                 | 6    | -0.532106 | -1.237013 | 0.200603  | 0.866961  | 1.000      |
| 622  | REACTOME-SIGNALING-BY-RHO-GTPASES-MIRO-GTPASES... | 9    | -0.467014 | -1.237437 | 0.228614  | 0.874390  | 1.000      |
| 623  | GOBP-CELL-CELL-JUNCTION-ORGANIZATION              | 6    | -0.539751 | -1.244711 | 0.224060  | 0.855990  | 1.000      |
| 624  | REACTOME-SIGNALING-BY-WNT                         | 7    | -0.490777 | -1.245724 | 0.202808  | 0.861006  | 1.000      |
| 625  | GOBP-TUBE-MORPHOGENESIS                           | 15   | -0.407913 | -1.248990 | 0.203081  | 0.857874  | 1.000      |
| 626  | GOBP-RESPONSE-TO-CALCIUM-ION                      | 6    | -0.550809 | -1.249243 | 0.196172  | 0.866307  | 1.000      |
| 627  | GOBP-PEPTIDYL-LYSINE-MODIFICATION                 | 5    | -0.577399 | -1.256788 | 0.195618  | 0.847889  | 1.000      |
| 628  | GOBP-RESPONSE-TO-LIPID                            | 19   | -0.387268 | -1.258514 | 0.188782  | 0.850135  | 1.000      |
| 629  | GOBP-CELL-POPULATION-PROLIFERATION                | 31   | -0.349394 | -1.259985 | 0.189857  | 0.854376  | 1.000      |
| 630  | GOBP-AGING                                        | 13   | -0.434099 | -1.269062 | 0.172943  | 0.830071  | 1.000      |
| 631  | GOBP-RESPONSE-TO-OXIDATIVE-STRESS                 | 8    | -0.503877 | -1.273106 | 0.175150  | 0.824349  | 1.000      |
| 632  | GOBP-MUSCLE-ORGAN-DEVELOPMENT                     | 9    | -0.476076 | -1.276722 | 0.189349  | 0.820506  | 1.000      |
| 633  | GOBP-RESPONSE-TO-REACTIVE-OXYGEN-SPECIES          | 8    | -0.503877 | -1.280173 | 0.185759  | 0.817224  | 1.000      |
| 634  | GOBP-NEGATIVE-REGULATION-OF-RESPONSE-TO-EXTERN... | 5    | -0.594458 | -1.282683 | 0.143082  | 0.817937  | 1.000      |
| 635  | GOBP-CELLULAR-RESPONSE-TO-REACTIVE-OXYGEN-SPECIES | 7    | -0.517462 | -1.284035 | 0.176901  | 0.822688  | 1.000      |
| 636  | GOBP-NEGATIVE-REGULATION-OF-CELL-CYCLE            | 5    | -0.590361 | -1.293442 | 0.153094  | 0.798017  | 1.000      |
| 637  | GOBP-SKIN-DEVELOPMENT                             | 5    | -0.590361 | -1.296129 | 0.162939  | 0.797520  | 1.000      |
| 638  | GOBP-PRL-MIRNA-TRANSCRIPTION-BY-RNA-POLYMERASE-II | 7    | -0.543210 | -1.301003 | 0.155172  | 0.789622  | 1.000      |
| 639  | GOBP-NEGATIVE-REGULATION-OF-BIOSYNTHETIC-PROCESS  | 13   | -0.441104 | -1.301772 | 0.145049  | 0.796712  | 1.000      |
| 640  | GOBP-REGULATION-OF-IMMUNE-RESPONSE                | 12   | -0.445444 | -1.303244 | 0.156338  | 0.801388  | 1.000      |
| 641  | GOBP-POSITIVE-REGULATION-OF-APOPTOTIC-SIGNALIN... | 5    | -0.590361 | -1.303845 | 0.153846  | 0.809322  | 1.000      |
| 642  | GOBP-NEGATIVE-REGULATION-OF-NUCLEOBASE-CONTAIN... | 13   | -0.441144 | -1.305200 | 0.154381  | 0.814562  | 1.000      |

Continuation of Table S15

| NAME                                                  | ID            | SIZE | ES        | NES       | NOM.p.val | FDR.q.val | FWER.p.val |
|-------------------------------------------------------|---------------|------|-----------|-----------|-----------|-----------|------------|
| 643 GOBP-POSITIVE-REGULATION_OF_PRL-MIRNA-TRANSCRI... | GO-1902895    | 7    | -0.543210 | -1.308474 | 0.147761  | 0.812417  | 1.000      |
| 644 GOBP-BIOLOGICAL-PROCESS-INVOLVED-IN-SYMBIOTIC.... | GO-004440     | 11   | -0.468308 | -1.313195 | 0.130564  | 0.804651  | 1.000      |
| 645 GOBP-POSITIVE-REGULATION_OF_CYTOKINE-PRODUCTION   | GO-0001819    | 7    | -0.529457 | -1.315668 | 0.137558  | 0.806027  | 1.000      |
| 646 GOBP-TISSUE-HOMEOSTASIS                           | GO-0001894    | 5    | -0.617752 | -1.316657 | 0.154446  | 0.812683  | 1.000      |
| 647 REACTOME-TRANSCRIPTIONAL-REGULATION_BY_TP53       | R-RNO-3700989 | 6    | -0.568724 | -1.320485 | 0.140060  | 0.808267  | 1.000      |
| 648 GOBP-MORPHOGENESIS-OF-AN-EPITHELIUM               | GO-0002009    | 6    | -0.564938 | -1.320495 | 0.121396  | 0.819616  | 1.000      |
| 649 GOBP-RESPONSE-TO-CYTOKINE                         | GO-0034097    | 23   | -0.384359 | -1.321209 | 0.121751  | 0.828558  | 1.000      |
| 650 GOBP-RESPONSE-TO-RADIATION                        | GO-0009314    | 13   | -0.453353 | -1.324540 | 0.135135  | 0.826742  | 1.000      |
| 651 GOBP-RESPONSE-TO-BIOTIC-STIMULUS                  | GO-0009607    | 17   | -0.420353 | -1.324562 | 0.125683  | 0.838863  | 1.000      |
| 652 GOBP-ORGANONITROGEN-COMPOUND-CATABOLIC-PROCESS    | GO-1901565    | 9    | -0.499458 | -1.328261 | 0.141384  | 0.836013  | 1.000      |
| 653 GOBP-CELL-CYCLE                                   | GO-0007049    | 21   | -0.402671 | -1.334929 | 0.128137  | 0.821869  | 1.000      |
| 654 GOBP-OSTEOCLAST-DIFFERENTIATION                   | GO-0030316    | 6    | -0.589089 | -1.354193 | 0.121951  | 0.755060  | 1.000      |
| 655 GOBP-FC-RECEPTOR-SIGNALING-PATHWAY                | GO-0038093    | 8    | -0.533909 | -1.357554 | 0.105797  | 0.753613  | 1.000      |
| 656 GOBP-IMMUNE-RESPONSE-REGULATING-SIGNALING-PATHWAY | GO-000276     | 8    | -0.533909 | -1.358258 | 0.126506  | 0.762686  | 1.000      |
| 657 GOBP-CIRCADIAN-RHYTHM                             | GO-0007623    | 13   | -0.468835 | -1.358722 | 0.122628  | 0.773043  | 1.000      |
| 658 REACTOME-RNA-POLYMERASE-III-TRANSCRIPTION         | R-RNO-73857   | 20   | -0.420654 | -1.380226 | 0.098202  | 0.702127  | 1.000      |
| 659 REACTOME-G-ALPHA-Q-SIGNALING-EVENTS               | R-RNO-416476  | 2    | -0.595291 | -1.380667 | 0.117363  | 0.711960  | 1.000      |
| 660 REACTOME-CELLULAR-RESPONSES-TO-EXTERNAL-STIMULI   | R-RNO-8953897 | 12   | -0.491161 | -1.392040 | 0.102817  | 0.681195  | 1.000      |
| 661 GOBP-CELLULAR-MACROMOLECULE-CATABOLIC-PROCESS     | GO-0044265    | 6    | -0.594837 | -1.396994 | 0.096519  | 0.673791  | 1.000      |
| 662 GOBP-CYTOKINE-PRODUCTION                          | GO-0001816    | 10   | -0.500590 | -1.397545 | 0.098257  | 0.683218  | 1.000      |
| 663 GOBP-INTRACELLULAR-RECEPTOR-SIGNALING-PATHWAY     | GO-0030522    | 5    | -0.650602 | -1.401082 | 0.076443  | 0.682430  | 1.000      |
| 664 GOBP-CELLULAR-RESPONSE-TO-EXTRACELLULAR-STIMULUS  | GO-0031668    | 8    | -0.552303 | -1.404357 | 0.089419  | 0.682470  | 1.000      |
| 665 GOBP-COAGULATION                                  | GO-0050817    | 8    | -0.546685 | -1.406119 | 0.104012  | 0.688634  | 1.000      |
| 666 REACTOME-INNATE-IMMUNE-SYSTEM                     | R-RNO-168249  | 16   | -0.448105 | -1.406603 | 0.111898  | 0.699762  | 1.000      |
| 667 GOBP-TISSUE-MORPHOGENESIS                         | GO-0048729    | 7    | -0.576078 | -1.420323 | 0.090484  | 0.659447  | 1.000      |
| 668 GOBP-PLATELET-ACTIVATION                          | GO-0030168    | 6    | -0.612069 | -1.423467 | 0.078025  | 0.660328  | 1.000      |
| 669 GOBP-REGULATION-OF-BODY-FLUID-LEVELS              | GO-0050878    | 11   | -0.504163 | -1.428257 | 0.088496  | 0.655637  | 1.000      |
| 670 GOBP-CELLULAR-RESPONSE-TO-INORGANIC-SUBSTANCE     | GO-0071241    | 11   | -0.513412 | -1.429643 | 0.089574  | 0.663382  | 1.000      |
| 671 GOBP-NEGATIVE-REGULATION-OF-PROTEIN-CATABOLIC.... | GO-0042177    | 5    | -0.660691 | -1.429925 | 0.082298  | 0.676168  | 1.000      |
| 672 GOBP-RESPONSE-TO-CADMIUM-ION                      | GO-0046686    | 6    | -0.619537 | -1.434778 | 0.056146  | 0.671078  | 1.000      |
| 673 REACTOME-HEMOSTASIS                               | R-RNO-109582  | 14   | -0.467906 | -1.442918 | 0.086131  | 0.655561  | 1.000      |
| 674 GOBP-REGULATION-OF-CELL-CELL-ADHESION             | GO-0022407    | 9    | -0.536418 | -1.446826 | 0.076700  | 0.654301  | 1.000      |
| 675 GOBP-CELLULAR-RESPONSE-TO-HORMONE-STIMULUS        | GO-0032870    | 11   | -0.531242 | -1.475629 | 0.063328  | 0.563856  | 1.000      |
| 676 REACTOME-MAPK-TARGETS-NUCLEAR-EVENTS-MEDIATED.... | R-HSA-450282  | 5    | -0.676909 | -1.478375 | 0.057692  | 0.567292  | 1.000      |
| 677 HALLMARK-TNFA-SIGNALING-VIA-NFKB                  | M5890         | 14   | -0.499837 | -1.492754 | 0.056277  | 0.532340  | 1.000      |
| 678 GOBP-REGULATION-OF-CELL-CYCLE                     | GO-0051726    | 13   | -0.510416 | -1.500639 | 0.052709  | 0.519832  | 1.000      |
| 679 REACTOME-BETA-CATENIN-INDEPENDENT-WNT-SIGNALING   | R-RNO-3858494 | 5    | -0.691304 | -1.501532 | 0.046774  | 0.529601  | 1.000      |
| 680 GOBP-FC-EPSILON-RECEPTOR-SIGNALING-PATHWAY        | GO-0038095    | 7    | -0.622534 | -1.509061 | 0.047041  | 0.517593  | 1.000      |
| 681 GOBP-REGULATION-OF-IMMUNE-SYSTEM-PROCESS          | GO-0002682    | 21   | -0.460122 | -1.509232 | 0.049731  | 0.530836  | 1.000      |
| 682 GOBP-MACROMOLECULE-CATABOLIC-PROCESS              | GO-0009057    | 12   | -0.528122 | -1.509751 | 0.056548  | 0.543332  | 1.000      |
| 683 REACTOME-MYD88-INDEPENDENT-TLR4-CASCADE           | R-RNO-166166  | 8    | -0.595824 | -1.510770 | 0.049347  | 0.554601  | 1.000      |
| 684 REACTOME-INTERLEUKIN-17-SIGNALING                 | R-RNO-448424  | 6    | -0.656629 | -1.515415 | 0.041475  | 0.554572  | 1.000      |
| 685 GOBP-REGULATION-OF-MYELOID-LEUKOCYTE-DIFFERENT... | GO-0002761    | 8    | -0.591163 | -1.515754 | 0.067485  | 0.569509  | 1.000      |



Continuation of Table S15

| NAME | ID                                                | SIZE          | ES | NES       | NOM.p.val | FDR.q.val | FWER.p.val |
|------|---------------------------------------------------|---------------|----|-----------|-----------|-----------|------------|
| 686  | REACTOME-TOLL-LIKE-RECEPTOR-CASCADES              | R-RNO-168898  | 8  | -0.595824 | -1.521964 | 0.047913  | 0.564319   |
| 687  | REACTOME-TOLL-LIKE-RECEPTOR-9_TLR9-CASCADE        | R-RNO-168138  | 8  | -0.595824 | -1.527133 | 0.040000  | 0.562309   |
| 688  | REACTOME-FC-EPSILON-RECEPTOR-FCER1-SIGNALING      | R-RNO-2454202 | 7  | -0.622534 | -1.530240 | 0.042105  | 0.567781   |
| 689  | GOBP-RHYTHMIC-PROCESS                             | GO-0048511    | 15 | -0.507901 | -1.547678 | 0.038516  | 0.522763   |
| 690  | REACTOME-TOLL-LIKE-RECEPTOR-TLR1_TLR2-CASCADE     | R-RNO-168179  | 8  | -0.595824 | -1.557066 | 0.039394  | 0.506852   |
| 691  | REACTOME-NGF-STIMULATED-TRANSCRIPTION             | R-RNO-9031628 | 9  | -0.573671 | -1.564125 | 0.038348  | 0.497564   |
| 692  | GOBP-POSITIVE-REGULATION-OF-IMMUNE-SYSTEM-PROCESS | GO-0002684    | 18 | -0.481099 | -1.572991 | 0.027510  | 0.485703   |
| 693  | GOBP-RESPONSE-TO-INTERLEUKIN-1                    | GO-0070555    | 5  | -0.699716 | -1.575267 | 0.028892  | 0.496384   |
| 694  | GOBP-POSITIVE-REGULATION-OF-MYELOID-CELL-DIFFE... | GO-0045639    | 7  | -0.634592 | -1.575442 | 0.039809  | 0.515600   |
| 695  | REACTOME-NUCLEAR-EVENTS-KINASE-AND-TRANSCRIPTI... | R-RNO-198725  | 11 | -0.558055 | -1.589192 | 0.031161  | 0.486285   |
| 696  | GOBP-IMMUNE-SYSTEM-DEVELOPMENT                    | GO-0002520    | 17 | -0.505115 | -1.592543 | 0.026426  | 0.495009   |
| 697  | GOBP-POSITIVE-REGULATION-OF-MYELOID-LEUKOCYTE-... | GO-0002763    | 6  | -0.698977 | -1.609914 | 0.019118  | 0.455885   |
| 698  | GOBP-RESPONSE-TO-BACTERIUM                        | GO-0009617    | 13 | -0.551643 | -1.614482 | 0.031474  | 0.461098   |
| 699  | GOBP-POSITIVE-REGULATION-OF-BIOSYNTHETIC-PROCESS  | GO-0009891    | 27 | -0.460307 | -1.616333 | 0.030914  | 0.477278   |
| 700  | GOBP-TRANSMEMBRANE-RECEPTOR-PROTEIN-SERINE-THR... | GO-0007178    | 6  | -0.684808 | -1.618317 | 0.012480  | 0.494704   |
| 701  | GOBP-RESPONSE-TO-MOLECULE-OF-BACTERIAL-ORIGIN     | GO-0002237    | 13 | -0.551643 | -1.619766 | 0.031609  | 0.516284   |
| 702  | HALLMARK-HYPOXIA                                  | M5891         | 5  | -0.747985 | -1.623891 | 0.021104  | 0.529960   |
| 703  | HALLMARK-APOPTOSIS                                | M5902         | 6  | -0.715914 | -1.643744 | 0.014218  | 0.483331   |
| 704  | GOBP-REGULATION-OF-LEUKOCYTE-DIFFERENTIATION      | GO-1902105    | 9  | -0.625920 | -1.666078 | 0.011799  | 0.433024   |
| 705  | GOBP-REGULATION-OF-MYELOID-CELL-DIFFERENTIATION   | GO-0045637    | 9  | -0.627973 | -1.667471 | 0.018547  | 0.459465   |
| 706  | GOBP-MYELOID-LEUKOCYTE-DIFFERENTIATION            | GO-0002573    | 11 | -0.594605 | -1.667495 | 0.017518  | 0.494679   |
| 707  | GOBP-MYELOID-CELL-DIFFERENTIATION                 | GO-0030099    | 13 | -0.573203 | -1.675075 | 0.018651  | 0.503931   |
| 708  | GOBP-CHROMOSOME-ORGANIZATION                      | GO-0051276    | 6  | -0.735472 | -1.679460 | 0.020093  | 0.528623   |
| 709  | GOBP-POSITIVE-REGULATION-OF-NUCLEOBASE-CONTAIN... | GO-0045935    | 28 | -0.482639 | -1.682217 | 0.019894  | 0.569421   |
| 710  | GOBP-RESPONSE-TO-MECHANICAL-STIMULUS              | GO-0009612    | 6  | -0.720544 | -1.687154 | 0.008157  | 0.611013   |
| 711  | GOBP-CHROMATIN-ORGANIZATION                       | GO-0006325    | 5  | -0.795181 | -1.713097 | 0.007899  | 0.562914   |
| 712  | REACTOME-SENESCENCE-ASSOCIATED-SECRETORY-PHENO... | R-RNO-2559582 | 6  | -0.767245 | -1.745132 | 0.003150  | 0.481880   |
| 713  | GOBP-POSITIVE-REGULATION-OF-TRANSCRIPTION-BY-R... | GO-0045944    | 24 | -0.509287 | -1.748578 | 0.020747  | 0.545625   |
| 714  | REACTOME-CELLULAR-SENESCENCE                      | R-RNO-2559583 | 6  | -0.767245 | -1.780211 | 0.003175  | 0.492311   |
| 715  | GOBP-LEUKOCYTE-DIFFERENTIATION                    | GO-0002521    | 15 | -0.566125 | -1.785010 | 0.008287  | 0.590950   |
| 716  | GOBP-POSITIVE-REGULATION-OF-HEMOPOIESIS           | GO-1903708    | 7  | -0.724212 | -1.787789 | 0.001582  | 0.768016   |
| 717  | GOBP-REGULATION-OF-HEMOPOIESIS                    | GO-1903706    | 10 | -0.656561 | -1.814804 | 0.010606  | 0.887978   |
| 718  | GOBP-RESPONSE-TO-DRUG                             | GO-0042493    | 11 | -0.670402 | -1.898578 | 0.004373  | 0.731224   |

End of Table

Supplementary Table S16: BG late profile (45 DPL peak) GSEA results.

| Begin of Table S16 |                                                   |            |      |          |          |           |           |            |  |
|--------------------|---------------------------------------------------|------------|------|----------|----------|-----------|-----------|------------|--|
|                    | NAME                                              | ID         | SIZE | ES       | NES      | NOM.p.val | FDR.q.val | FWER.p.val |  |
| 0                  | GOBP-CELL-CYCLE                                   | GO:0007049 | 21   | 0.688508 | 2.187956 | 0.000000  | 0.008712  | 0.007      |  |
| 1                  | GOBP-NEGATIVE-REGULATION_OF_GENE-EXPRESSION       | GO:0010629 | 12   | 0.747671 | 2.080675 | 0.000000  | 0.027282  | 0.043      |  |
| 2                  | GOBP-POSTTRANSCRIPTIONAL-REGULATION_OF_GENE-EX... | GO:0010608 | 8    | 0.837801 | 2.059416 | 0.000000  | 0.022322  | 0.052      |  |
| 3                  | GOBP-CELLULAR-AMIDE-METABOLIC-PROCESS             | GO:0043603 | 13   | 0.704689 | 2.000565 | 0.000000  | 0.042499  | 0.130      |  |
| 4                  | GOBP-GROWTH                                       | GO:0040007 | 14   | 0.678726 | 1.941892 | 0.000000  | 0.075044  | 0.264      |  |
| 5                  | GOBP-GAMETE-GENERATION                            | GO:0007276 | 9    | 0.749268 | 1.908591 | 0.000000  | 0.091444  | 0.364      |  |
| 6                  | GOBP-PEPTIDE-METABOLIC-PROCESS                    | GO:0006518 | 12   | 0.689573 | 1.903534 | 0.001361  | 0.082782  | 0.383      |  |
| 7                  | GOBP-REGULATION_OF_CELLULAR-AMIDE-METABOLIC-PR... | GO:0034248 | 9    | 0.734005 | 1.870772 | 0.001397  | 0.112932  | 0.529      |  |
| 8                  | GOBP-MULTICELLULAR-ORGANISM-REPRODUCTION          | GO:0032504 | 12   | 0.666189 | 1.852039 | 0.005369  | 0.127062  | 0.607      |  |
| 9                  | GOBP-ORGANONITROGEN-COMPOUND-BIOSYNTHETIC-PROCESS | GO:1901566 | 13   | 0.654682 | 1.849304 | 0.000000  | 0.117583  | 0.615      |  |
| 10                 | GOBP-NEGATIVE-REGULATION_OF_MULTICELLULAR-ORGA... | GO:0051241 | 15   | 0.627710 | 1.826315 | 0.005236  | 0.140529  | 0.730      |  |
| 11                 | GOBP-REGULATION-OF-GROWTH                         | GO:0040008 | 13   | 0.651571 | 1.811658 | 0.002714  | 0.150821  | 0.774      |  |
| 12                 | GOBP-POSITIVE-REGULATION_OF_MAP_KINASE-ACTIVITY   | GO:0043406 | 6    | 0.798853 | 1.810989 | 0.004373  | 0.140642  | 0.779      |  |
| 13                 | GOBP-REGULATION-OF-MAP-KINASE-ACTIVITY            | GO:0043405 | 9    | 0.701610 | 1.800464 | 0.002837  | 0.146364  | 0.812      |  |
| 14                 | GOBP-SEXUAL-REPRODUCTION                          | GO:0019953 | 10   | 0.690190 | 1.799481 | 0.002878  | 0.138514  | 0.815      |  |
| 15                 | GOBP-POSITIVE-REGULATION_OF_PROTEIN-SERINE-THR... | GO:0071902 | 6    | 0.686880 | 1.784689 | 0.008475  | 0.151177  | 0.861      |  |
| 16                 | GOBP-ACTIVATION_OF_MAPK-ACTIVITY                  | GO:0000187 | 6    | 0.798853 | 1.784683 | 0.001427  | 0.142284  | 0.861      |  |
| 17                 | GOBP-POSITIVE-REGULATION_OF_CELL-POPULATION-PR... | GO:0008284 | 21   | 0.565608 | 1.784369 | 0.005249  | 0.134584  | 0.861      |  |
| 18                 | GOBP-POSITIVE-REGULATION_OF_ESTABLISHMENT_OF_P... | GO:1904951 | 5    | 0.843560 | 1.766732 | 0.000000  | 0.154477  | 0.900      |  |
| 19                 | GOBP-REGULATION_OF_PROTEIN-SERINE-THREONINE-KI... | GO:0071900 | 12   | 0.639657 | 1.766392 | 0.001395  | 0.146994  | 0.900      |  |
| 20                 | GOBP-ERK1-AND-ERK2-CASCADE                        | GO:0070371 | 5    | 0.827784 | 1.765826 | 0.002981  | 0.140700  | 0.901      |  |
| 21                 | GOBP-MITOTIC-CELL-CYCLE                           | GO:0000278 | 10   | 0.676616 | 1.763109 | 0.008523  | 0.138416  | 0.906      |  |
| 22                 | GOBP-MUSCLE-ADAPTATION                            | GO:0043500 | 5    | 0.823221 | 1.760237 | 0.001618  | 0.137139  | 0.909      |  |
| 23                 | GOBP-MONOSACCHARIDE-METABOLIC-PROCESS             | GO:0005996 | 6    | 0.775158 | 1.755633 | 0.003012  | 0.137359  | 0.922      |  |
| 24                 | GOBP-GLUCOSE-METABOLIC-PROCESS                    | GO:0006006 | 6    | 0.775158 | 1.750625 | 0.001484  | 0.138716  | 0.933      |  |
| 25                 | GOBP-POSITIVE-REGULATION_OF_CELL-ADHESION         | GO:0045785 | 7    | 0.729700 | 1.743435 | 0.004348  | 0.143252  | 0.948      |  |
| 26                 | GOBP-CELL-GROWTH                                  | GO:0016049 | 10   | 0.650283 | 1.734641 | 0.005772  | 0.149353  | 0.959      |  |
| 27                 | GOBP-REGULATION_OF_DNA-BINDING-TRANSCRIPTION_F... | GO:0051090 | 16   | 0.575079 | 1.725752 | 0.003937  | 0.156378  | 0.974      |  |
| 28                 | GOBP-REGULATION_OF_ANION-TRANSMEMBRANE-TRANSPORT  | GO:1903959 | 5    | 0.801351 | 1.724875 | 0.009174  | 0.152392  | 0.975      |  |
| 29                 | GOBP-REGULATION_OF_CELLULAR-COMPONENT_MOVEMENT    | GO:0051270 | 15   | 0.585625 | 1.718063 | 0.010430  | 0.158724  | 0.979      |  |
| 30                 | GOBP-AMIDE-BIOSYNTHETIC-PROCESS                   | GO:0043604 | 7    | 0.712430 | 1.710088 | 0.012640  | 0.166351  | 0.986      |  |
| 31                 | GOBP-DEVELOPMENTAL-PROCESS_INVOLVED_IN_REPRODU... | GO:0003006 | 11   | 0.631560 | 1.708764 | 0.014205  | 0.163182  | 0.987      |  |
| 32                 | GOBP-NEGATIVE-REGULATION_OF_MOLECULAR-FUNCTION    | GO:0044092 | 24   | 0.527897 | 1.705909 | 0.008816  | 0.162268  | 0.987      |  |
| 33                 | GOBP-PROTEIN-DEPHOSPHORYLATION                    | GO:0006470 | 7    | 0.719714 | 1.705505 | 0.007267  | 0.157965  | 0.987      |  |
| 34                 | GOBP-ORGAN-GROWTH                                 | GO:0035265 | 5    | 0.801419 | 1.705058 | 0.006192  | 0.153948  | 0.988      |  |
| 35                 | GOBP-PEPTIDE-BIOSYNTHETIC-PROCESS                 | GO:0043043 | 7    | 0.712430 | 1.702800 | 0.008451  | 0.152984  | 0.988      |  |
| 36                 | GOBP-CARBOHYDRATE-METABOLIC-PROCESS               | GO:0005975 | 9    | 0.666849 | 1.700850 | 0.016997  | 0.151199  | 0.989      |  |
| 37                 | GOBP-REGULATION_OF_MUSCLE-ADAPTATION              | GO:0043502 | 5    | 0.823221 | 1.693276 | 0.001563  | 0.158753  | 0.993      |  |
| 38                 | GOBP-DEPHOSPHORYLATION                            | GO:0016311 | 7    | 0.719714 | 1.688806 | 0.010057  | 0.161593  | 0.994      |  |
| 39                 | GOBP-MULTI-ORGANISM-PROCESS                       | GO:0051704 | 16   | 0.572056 | 1.688659 | 0.014925  | 0.157862  | 0.994      |  |
| 40                 | GOBP-POSITIVE-REGULATION_OF_LOCOMOTION            | GO:0040017 | 11   | 0.630808 | 1.683650 | 0.012766  | 0.161349  | 0.994      |  |

Continuation of Table S16

|    | NAME                                              | ID         | SIZE | ES       | NES      | NOM.p.val | FDR.q.val | FWER.p.val |
|----|---------------------------------------------------|------------|------|----------|----------|-----------|-----------|------------|
| 41 | GOBP-REGULATION-OF-ORGAN-GROWTH                   | GO-0046620 | 5    | 0.801419 | 1.680083 | 0.013255  | 0.162600  | 0.996      |
| 42 | GOBP-REGULATION-OF-PEPTIDE-SECRETION              | GO-0002791 | 7    | 0.701645 | 1.661094 | 0.013699  | 0.188761  | 0.999      |
| 43 | GOBP-NEGATIVE-REGULATION-OF-CELL-DIFFERENTIATION  | GO-0045596 | 13   | 0.595946 | 1.658601 | 0.016086  | 0.188547  | 0.999      |
| 44 | GOBP-NEGATIVE-REGULATION-OF-DEVELOPMENTAL-PROCESS | GO-0051093 | 13   | 0.595946 | 1.655921 | 0.017380  | 0.188221  | 0.999      |
| 45 | GOBP-REGULATION-OF-PEPTIDE-TRANSPORT              | GO-0090087 | 10   | 0.631603 | 1.655710 | 0.016506  | 0.184481  | 0.999      |
| 46 | GOBP-NEGATIVE-REGULATION-OF-CELLULAR-COMPONENT... | GO-0051129 | 11   | 0.617579 | 1.655543 | 0.025352  | 0.180818  | 0.999      |
| 47 | GOBP-RESPONSE-TO-TUMOR-NECROSIS-FACTOR            | GO-0034612 | 7    | 0.707604 | 1.651983 | 0.012987  | 0.182869  | 0.999      |
| 48 | GOBP-CELL-CYCLE-PROCESS                           | GO-0022402 | 11   | 0.599334 | 1.650543 | 0.019310  | 0.181391  | 0.999      |
| 49 | GOBP-POSITIVE-REGULATION-OF-APOPTOTIC-SIGNALIN... | GO-2001235 | 5    | 0.783133 | 1.646733 | 0.010870  | 0.184106  | 1.000      |
| 50 | GOBP-REGULATION-OF-ANION-TRANSPORT                | GO-0044070 | 20   | 0.526105 | 1.645768 | 0.015645  | 0.182027  | 1.000      |
| 51 | GOBP-EXTRINSIC-APOPTOTIC-SIGNALING-PATHWAY        | GO-0097191 | 7    | 0.691442 | 1.638405 | 0.011799  | 0.189770  | 1.000      |
| 52 | GOBP-REGULATION-OF-MULTICELLULAR-ORGANISMAL-DE... | GO-2000026 | 31   | 0.477615 | 1.632374 | 0.013514  | 0.195428  | 1.000      |
| 53 | GOBP-MEMBRANE-PROTEIN-PROTEOLYSIS                 | GO-0038619 | 6    | 0.721138 | 1.631770 | 0.010903  | 0.193118  | 1.000      |
| 54 | GOBP-MALE-GAMETE-GENERATION                       | GO-0048232 | 5    | 0.764139 | 1.620189 | 0.010989  | 0.209931  | 1.000      |
| 55 | GOBP-CIRCULATORY-SYSTEM-DEVELOPMENT               | GO-0072359 | 21   | 0.499822 | 1.617551 | 0.022078  | 0.210402  | 1.000      |
| 56 | GOBP-CELLULAR-CARBOHYDRATE-METABOLIC-PROCESS      | GO-0044262 | 5    | 0.749962 | 1.608577 | 0.018663  | 0.223117  | 1.000      |
| 57 | GOBP-CELLULAR-RESPONSE-TO-EXTERNAL-STIMULUS       | GO-0071496 | 10   | 0.614118 | 1.604973 | 0.021739  | 0.226382  | 1.000      |
| 58 | GOBP-MUSCLE-CELL-PROLIFERATION                    | GO-0033002 | 8    | 0.656806 | 1.602217 | 0.011494  | 0.227589  | 1.000      |
| 59 | GOBP-REGULATION-OF-CELLULAR-CATABOLIC-PROCESS     | GO-0031329 | 10   | 0.612452 | 1.596786 | 0.022378  | 0.233894  | 1.000      |
| 60 | GOBP-CELLULAR-GLUCOSE-HOMEOSTASIS                 | GO-0001678 | 5    | 0.739652 | 1.592208 | 0.019727  | 0.238339  | 1.000      |
| 61 | GOBP-CELL-POPULATION-PROLIFERATION                | GO-0008283 | 31   | 0.469021 | 1.590572 | 0.013189  | 0.237552  | 1.000      |
| 62 | GOBP-REGULATION-OF-EXTRINSIC-APOPTOTIC-SIGNALI... | GO-2001236 | 6    | 0.704620 | 1.580704 | 0.023881  | 0.253528  | 1.000      |
| 63 | GOBP-CELLULAR-RESPONSE-TO-OXYGEN-CONTAINING-CO... | GO-1901701 | 29   | 0.463302 | 1.580182 | 0.021303  | 0.250319  | 1.000      |
| 64 | GOBP-ANION-TRANSMEMBRANE-TRANSPORT                | GO-0098656 | 7    | 0.668632 | 1.579817 | 0.026826  | 0.247288  | 1.000      |
| 65 | GOBP-REPRODUCTION                                 | GO-0000003 | 18   | 0.510132 | 1.564785 | 0.032425  | 0.274049  | 1.000      |
| 66 | GOBP-SKIN-DEVELOPMENT                             | GO-0043588 | 5    | 0.727062 | 1.555852 | 0.027950  | 0.288245  | 1.000      |
| 67 | GOBP-CELLULAR-RESPONSE-TO-LIPID                   | GO-0071396 | 15   | 0.523995 | 1.548531 | 0.038889  | 0.300991  | 1.000      |
| 68 | GOBP-CELLULAR-RESPONSE-TO-EXTRACELLULAR-STIMULUS  | GO-0031668 | 8    | 0.632456 | 1.547673 | 0.026462  | 0.298607  | 1.000      |
| 69 | GOBP-AMYLOID-BETA-METABOLIC-PROCESS               | GO-0050435 | 5    | 0.722308 | 1.545967 | 0.015576  | 0.297773  | 1.000      |
| 70 | GOBP-CELLULAR-COMPONENT-DISASSEMBLY               | GO-0022411 | 6    | 0.694200 | 1.540547 | 0.025335  | 0.305784  | 1.000      |
| 71 | GOBP-AMYLOID-PRECURSOR-PROTEIN-METABOLIC-PROCESS  | GO-0042982 | 5    | 0.722308 | 1.539824 | 0.024206  | 0.303123  | 1.000      |
| 72 | GOBP-AMYLOID-PRECURSOR-PROTEIN-CATABOLIC-PROCESS  | GO-0042987 | 5    | 0.722308 | 1.534315 | 0.025797  | 0.311598  | 1.000      |
| 73 | GOBP-REGULATION-OF-CARBOHYDRATE-METABOLIC-PROCESS | GO-0006109 | 5    | 0.711265 | 1.528994 | 0.027650  | 0.318735  | 1.000      |
| 74 | GOBP-CELL-MIGRATION                               | GO-0016477 | 22   | 0.472978 | 1.526626 | 0.047739  | 0.320484  | 1.000      |
| 75 | GOBP-PROTEIN-PHOSPHORYLATION                      | GO-0006468 | 34   | 0.446659 | 1.522357 | 0.035496  | 0.326567  | 1.000      |
| 76 | GOBP-POSITIVE-REGULATION-OF-MAPK-CASCADE          | GO-0043410 | 9    | 0.600959 | 1.520716 | 0.050992  | 0.325895  | 1.000      |
| 77 | GOBP-ESTABLISHMENT-OF-PROTEIN-LOCALIZATION        | GO-0045184 | 18   | 0.502325 | 1.517711 | 0.040682  | 0.329100  | 1.000      |
| 78 | GOBP-PEPTIDE-SECRETION                            | GO-0002790 | 9    | 0.595202 | 1.516385 | 0.038028  | 0.327883  | 1.000      |
| 79 | GOBP-LIPID-METABOLIC-PROCESS                      | GO-0006629 | 10   | 0.564921 | 1.516164 | 0.043988  | 0.324205  | 1.000      |
| 80 | GOBP-HEART-DEVELOPMENT                            | GO-0007507 | 6    | 0.682015 | 1.515066 | 0.030257  | 0.322826  | 1.000      |
| 81 | GOBP-NUCLEAR-TRANSPORT                            | GO-0051169 | 5    | 0.719320 | 1.511851 | 0.041481  | 0.326353  | 1.000      |
| 82 | GOBP-POSITIVE-REGULATION-OF-MULTICELLULAR-ORGA... | GO-0051240 | 32   | 0.444260 | 1.511406 | 0.040964  | 0.323502  | 1.000      |
| 83 | GOBP-PEPTIDE-HORMONE-SECRETION                    | GO-0030072 | 7    | 0.635005 | 1.511232 | 0.035211  | 0.319931  | 1.000      |

Continuation of Table S16

| NAME | ID                                                | SIZE | ES        | NES      | NOM.p.val | FDR.q.val | FWER.p.val |
|------|---------------------------------------------------|------|-----------|----------|-----------|-----------|------------|
| 84   | GOBP-NEGATIVE-REGULATION-OF-PROTEIN-METABOLIC...  | 20   | 0.493293  | 1.511107 | 0.049682  | 0.316400  | 1.000      |
| 85   | GOBP-CARDIAC-MUSCLE-TISSUE-DEVELOPMENT            | 6    | 0.682015  | 1.507559 | 0.042587  | 0.320904  | 1.000      |
| 86   | GOBP-POLYSACCHARIDE-METABOLIC-PROCESS             | 5    | 0.712255  | 1.506432 | 0.034429  | 0.319805  | 1.000      |
| 87   | GOBP-NEGATIVE-REGULATION-OF-SIGNALING             | 21   | 0.023057  | 1.505065 | 0.046572  | 0.318868  | 1.000      |
| 88   | GOBP-PROTEIN-LOCALIZATION-TO-ORGANELLE            | 9    | 0.590261  | 1.504442 | 0.038905  | 0.316575  | 1.000      |
| 89   | GOBP-NEGATIVE-REGULATION-OF-CATALYTIC-ACTIVITY    | 17   | 0.499422  | 1.502805 | 0.044595  | 0.316882  | 1.000      |
| 90   | GOBP-MUSCLE-TISSUE-DEVELOPMENT                    | 11   | 0.552588  | 1.501256 | 0.047026  | 0.316783  | 1.000      |
| 91   | GOBP-CARBOHYDRATE-BIOSYNTHETIC-PROCESS            | 5    | 0.711265  | 1.500809 | 0.042122  | 0.314355  | 1.000      |
| 92   | GOBP-REGULATION-OF-MITOTIC-CELL-CYCLE             | 5    | 0.699075  | 1.499104 | 0.029687  | 0.314417  | 1.000      |
| 93   | REACTOME-CELL-CYCLE-MITOTIC                       | 5    | 0.708654  | 1.497430 | 0.035008  | 0.315158  | 1.000      |
| 94   | GOBP-INSULIN-SECRETION                            | 7    | 0.635005  | 1.494897 | 0.046784  | 0.317424  | 1.000      |
| 95   | GOBP-REGULATION-OF-MAPK-CASCADE                   | 13   | 0.0043408 | 1.492548 | 0.049333  | 0.319076  | 1.000      |
| 96   | GOBP-REGULATION-OF-CARBOHYDRATE-BIOSYNTHETIC-P... | 5    | 0.711265  | 1.491633 | 0.036641  | 0.317667  | 1.000      |
| 97   | GOBP-REGULATION-OF-PHOSPHATIDYLINOSITOL-3-KINA... | 6    | 0.664193  | 1.488207 | 0.039514  | 0.322096  | 1.000      |
| 98   | GOBP-REGULATION-OF-HORMONE-LEVELS                 | 12   | 0.539114  | 1.487776 | 0.062927  | 0.319780  | 1.000      |
| 99   | GOBP-REGULATION-OF-MUSCLE-SYSTEM-PROCESS          | 8    | 0.593085  | 1.487711 | 0.049635  | 0.316706  | 1.000      |
| 100  | REACTOME-SIGNALING-BY-RHO-GTPASES-MIRO-GTPASES... | 9    | 0.586295  | 1.486456 | 0.048951  | 0.316065  | 1.000      |
| 101  | GOBP-SECRETION                                    | 24   | 0.455603  | 1.483955 | 0.063452  | 0.318480  | 1.000      |
| 102  | REACTOME-RHO-GTPASE-EFFECTORS                     | 9    | 0.586295  | 1.483700 | 0.050776  | 0.315982  | 1.000      |
| 103  | GOBP-MUSCLE-CELL-DEVELOPMENT                      | 5    | 0.702409  | 1.483187 | 0.053731  | 0.314149  | 1.000      |
| 104  | GOBP-CELLULAR-RESPONSE-TO-DNA-DAMAGE-STIMULUS     | 5    | 0.700093  | 1.482426 | 0.041359  | 0.312940  | 1.000      |
| 105  | REACTOME-SIGNALING-BY-GPCR                        | 22   | 0.459041  | 1.481280 | 0.051414  | 0.312404  | 1.000      |
| 106  | GOBP-POSITIVE-REGULATION-OF-CELLULAR-COMPONENT... | 24   | 0.449022  | 1.474650 | 0.051546  | 0.323955  | 1.000      |
| 107  | GOBP-DEVELOPMENTAL-GROWTH                         | 10   | 0.559522  | 1.473146 | 0.059219  | 0.324163  | 1.000      |
| 108  | GOBP-REGULATION-OF-PROTEIN-STABILITY              | 5    | 0.701171  | 1.470555 | 0.048632  | 0.326888  | 1.000      |
| 109  | REACTOME-CELL-CYCLE                               | 6    | 0.650876  | 1.467244 | 0.046407  | 0.331125  | 1.000      |
| 110  | GOBP-REGULATION-OF-PEPTIDE-HORMONE-SECRETION      | 6    | 0.658570  | 1.466014 | 0.049275  | 0.330835  | 1.000      |
| 111  | GOBP-REGULATION-OF-PROTEIN-KINASE-ACTIVITY        | 22   | 0.449097  | 1.463482 | 0.063325  | 0.333354  | 1.000      |
| 112  | REACTOME-CIRCADIAN-CLOCK                          | 5    | 0.691443  | 1.461657 | 0.046656  | 0.334293  | 1.000      |
| 113  | GOBP-ACTIVATION-OF-PROTEIN-KINASE-ACTIVITY        | 11   | 0.535297  | 1.457646 | 0.067227  | 0.340153  | 1.000      |
| 114  | GOBP-MACROMOLECULE-CATABOLIC-PROCESS              | 12   | 0.52189   | 1.457064 | 0.077562  | 0.338406  | 1.000      |
| 115  | GOBP-INOSITOL-LIPID-MEDIATED-SIGNALING            | 8    | 0.587361  | 1.453691 | 0.079096  | 0.342817  | 1.000      |
| 116  | REACTOME-DEATH-RECEPTOR-SIGNALING                 | 5    | 0.682140  | 1.452914 | 0.049401  | 0.341342  | 1.000      |
| 117  | REACTOME-G-ALPHA-Q-SIGNALING-EVENTS               | 6    | 0.645659  | 1.449127 | 0.078550  | 0.347137  | 1.000      |
| 118  | GOBP-PHOSPHATIDYLINOSITOL-3-KINASE-SIGNALING      | 7    | 0.599973  | 1.448985 | 0.078148  | 0.344482  | 1.000      |
| 119  | GOBP-REGULATION-OF-TRANSFERASE-ACTIVITY           | 22   | 0.449097  | 1.444248 | 0.082051  | 0.352067  | 1.000      |
| 120  | GOBP-INTRACELLULAR-TRANSPORT                      | 11   | 0.532943  | 1.440905 | 0.083562  | 0.356632  | 1.000      |
| 121  | GOBP-INTRACELLULAR-RECEPTOR-SIGNALING-PATHWAY     | 5    | 0.682014  | 1.439067 | 0.079755  | 0.357722  | 1.000      |
| 122  | REACTOME-DISEASES-OF-SIGNAL-TRANSDUCTION-BY-GR... | 12   | 0.515641  | 1.438080 | 0.096454  | 0.357144  | 1.000      |
| 123  | GOBP-REGULATION-OF-PHOSPHORUS-METABOLIC-PROCESS   | 27   | 0.427554  | 1.437162 | 0.062344  | 0.356425  | 1.000      |
| 124  | GOBP-REGULATION-OF-SMALL-MOLECULE-METABOLIC-PR... | 9    | 0.555652  | 1.434624 | 0.073171  | 0.359152  | 1.000      |
| 125  | GOBP-NEGATIVE-REGULATION-OF-PHOSPHORYLATION       | 7    | 0.602882  | 1.432820 | 0.064140  | 0.360320  | 1.000      |
| 126  | GOBP-REGULATION-OF-PROTEIN-LOCALIZATION           | 18   | 0.467655  | 1.431893 | 0.086050  | 0.359342  | 1.000      |

Continuation of Table S16

| NAME                                                  | ID           | SIZE | ES       | NES      | NOM.p.val | FDR.q.val | FWER.p.val |
|-------------------------------------------------------|--------------|------|----------|----------|-----------|-----------|------------|
| 127 GOBP-POSITIVE-REGULATION_OF_PROTEIN_PHOSPHORYL... | GO-0001934   | 23   | 0.442270 | 1.428026 | 0.091837  | 0.365005  | 1.000      |
| 128 GOBP-REGULATION_OF_APOPTOTIC-SIGNALING.PATHWAY    | GO-2001233   | 10   | 0.545515 | 1.426399 | 0.070126  | 0.365903  | 1.000      |
| 129 GOBP-REGULATION_OF_VASCULATURE.DEVELOPMENT        | GO-1901342   | 5    | 0.670521 | 1.424845 | 0.065282  | 0.366506  | 1.000      |
| 130 GOBP-POSITIVE-REGULATION_OF_ORGANELLE-ORGANIZA... | GO-0010638   | 10   | 0.535680 | 1.424758 | 0.077465  | 0.363830  | 1.000      |
| 131 GOBP-REGULATION_OF_CELL-DIFFERENTIATION           | GO-0045595   | 36   | 0.412612 | 1.423751 | 0.075243  | 0.363213  | 1.000      |
| 132 GOBP-REGULATION_OF_PROTEIN_PHOSPHORYLATION        | GO-0001932   | 26   | 0.432652 | 1.422958 | 0.075031  | 0.362126  | 1.000      |
| 133 GOBP-POSITIVE-REGULATION_OF_NUCLEOBASE-CONTAIN... | GO-0045935   | 28   | 0.420682 | 1.421636 | 0.075871  | 0.362526  | 1.000      |
| 134 GOBP-INTRACELLULAR-PROTEIN-TRANSPORT              | GO-0006886   | 9    | 0.565899 | 1.420945 | 0.093931  | 0.361380  | 1.000      |
| 135 GOBP-REGULATION_OF_HORMONE-SECRETION              | GO-0046883   | 8    | 0.581110 | 1.419628 | 0.085554  | 0.361742  | 1.000      |
| 136 REACTOME-PLATELET_ACTIVATION-SIGNALING-AND-AGG... | R-HSA-76002  | 7    | 0.602485 | 1.417533 | 0.071839  | 0.363887  | 1.000      |
| 137 GOBP-POSITIVE-REGULATION_OF_PROTEIN-MODIFICATI... | GO-0031401   | 23   | 0.442270 | 1.416368 | 0.082687  | 0.363833  | 1.000      |
| 138 GOBP-TISSUE-MORPHOGENESIS                         | GO-0048729   | 7    | 0.611578 | 1.415876 | 0.066474  | 0.362201  | 1.000      |
| 139 GOBP-DNA-METABOLIC-PROCESS                        | GO-0009259   | 6    | 0.624629 | 1.411682 | 0.096070  | 0.368744  | 1.000      |
| 140 GOBP-NEGATIVE-REGULATION_OF_PHOSPHORUS-METABOL... | GO-0010563   | 9    | 0.561169 | 1.411395 | 0.089655  | 0.366827  | 1.000      |
| 141 GOBP-HORMONE-TRANSPORT                            | GO-0009914   | 9    | 0.565425 | 1.410075 | 0.092287  | 0.367036  | 1.000      |
| 142 GOBP-POSITIVE-REGULATION_OF_GROWTH                | GO-0045927   | 9    | 0.554940 | 1.408940 | 0.084626  | 0.366708  | 1.000      |
| 143 GOBP-CARBOHYDRATE-HOMEOSTASIS                     | GO-0033500   | 7    | 0.591453 | 1.408855 | 0.085014  | 0.364359  | 1.000      |
| 144 REACTOME-INNATE-IMMUNE-SYSTEM                     | R-RNO-168249 | 16   | 0.470422 | 1.408168 | 0.091146  | 0.363221  | 1.000      |
| 145 GOBP-POSITIVE-REGULATION_OF_BIOSYNTHETIC-PROCESS  | GO-0009891   | 27   | 0.428590 | 1.406929 | 0.085242  | 0.363299  | 1.000      |
| 146 GOBP-EMBRYO-DEVELOPMENT                           | GO-0009790   | 14   | 0.479642 | 1.402893 | 0.090066  | 0.370051  | 1.000      |
| 147 GOBP-NEGATIVE-REGULATION_OF_HYDROLASE-ACTIVITY    | GO-0051346   | 11   | 0.512405 | 1.402540 | 0.076596  | 0.368365  | 1.000      |
| 148 REACTOME-OPIOID-SIGNALING                         | R-RNO-111885 | 12   | 0.505661 | 1.401353 | 0.106648  | 0.368777  | 1.000      |
| 149 GOBP-REGULATION_OF_CELL-CYCLE-PROCESS             | GO-0010564   | 5    | 0.659436 | 1.400113 | 0.081325  | 0.369255  | 1.000      |
| 150 REACTOME-SIGNALING_BY_INTERLEUKINS                | R-RNO-449147 | 15   | 0.475314 | 1.396138 | 0.088591  | 0.375485  | 1.000      |
| 151 GOBP-REGULATION_OF_INTRACELLULAR-SIGNAL-TRANSD... | GO-1902531   | 21   | 0.443092 | 1.390477 | 0.101430  | 0.385886  | 1.000      |
| 152 GOBP-WOUND-HEALING                                | GO-0042060   | 13   | 0.484829 | 1.389330 | 0.087379  | 0.385880  | 1.000      |
| 153 GOBP-POSITIVE-REGULATION_OF_PROTEIN-KINASE-ACT... | GO-0045860   | 19   | 0.451097 | 1.386529 | 0.093298  | 0.389640  | 1.000      |
| 154 GOBP-LEUKOCYTE-MIGRATION                          | GO-0050900   | 6    | 0.623666 | 1.386375 | 0.074405  | 0.387382  | 1.000      |
| 155 GOBP-NEGATIVE-REGULATION_OF_CELL-CYCLE            | GO-0045786   | 5    | 0.650330 | 1.383859 | 0.090016  | 0.390544  | 1.000      |
| 156 GOBP-POSITIVE-REGULATION_OF_PPTIDYL-TYROSINE...   | GO-0050731   | 8    | 0.558929 | 1.379317 | 0.109705  | 0.398812  | 1.000      |
| 157 GOBP-POSITIVE-REGULATION_OF_LEUKOCYTE-CELL-CEL... | GO-1903039   | 5    | 0.659362 | 1.375481 | 0.080425  | 0.405416  | 1.000      |
| 158 GOBP-REGULATION_OF_PPTIDYL-TYROSINE-PHOSPHORY...  | GO-0050730   | 9    | 0.537944 | 1.375472 | 0.117898  | 0.402897  | 1.000      |
| 159 GOBP-POSITIVE-REGULATION_OF_CELL-CELL-ADHESION    | GO-0022409   | 5    | 0.659362 | 1.372807 | 0.099248  | 0.406428  | 1.000      |
| 160 GOBP-SMALL-MOLECULE-METABOLIC-PROCESS             | GO-0044281   | 15   | 0.464769 | 1.372731 | 0.097497  | 0.404128  | 1.000      |
| 161 GOBP-POSITIVE-REGULATION_OF_MOLECULAR-FUNCTION    | GO-0044093   | 38   | 0.391160 | 1.372464 | 0.099515  | 0.402239  | 1.000      |
| 162 GOBP-REGULATION_OF_CELL-ADHESION                  | GO-0030155   | 13   | 0.485208 | 1.372309 | 0.113855  | 0.400022  | 1.000      |
| 163 GOBP-REGULATION_OF_CATABOLIC-PROCESS              | GO-0009894   | 13   | 0.485129 | 1.370629 | 0.103356  | 0.401187  | 1.000      |
| 164 GOBP-CYTOKINE-PRODUCTION                          | GO-0001816   | 10   | 0.515139 | 1.368169 | 0.111111  | 0.404171  | 1.000      |
| 165 GOBP-REGULATION_OF-ANATOMICAL-STRUCTURE-MORPHO... | GO-0022603   | 17   | 0.456246 | 1.367727 | 0.103811  | 0.402754  | 1.000      |
| 166 GOBP-NEGATIVE-REGULATION_OF-TRANSPORT             | GO-0051051   | 13   | 0.487307 | 1.366904 | 0.095890  | 0.402385  | 1.000      |
| 167 GOBP-REGULATION_OF_PROTEIN-MODIFICATION-PROCESS   | GO-0031399   | 29   | 0.404457 | 1.366818 | 0.101759  | 0.400154  | 1.000      |
| 168 GOBP-POSITIVE-REGULATION_OF_PHOSPHORUS-METABOL... | GO-0010562   | 24   | 0.420828 | 1.366376 | 0.094645  | 0.398889  | 1.000      |
| 169 GOBP-RHYTHMIC-PROCESS                             | GO-0048511   | 15   | 0.466049 | 1.364993 | 0.104497  | 0.399738  | 1.000      |

Continuation of Table S16

| NAME | ID                                                | SIZE | ES       | NES      | NOM.p.val | FDR.q.val | FWER.p.val |
|------|---------------------------------------------------|------|----------|----------|-----------|-----------|------------|
| 170  | GOBP-POSITIVE-REGULATION_OF_INTRACELLULAR_SIGN... | 14   | 0.482014 | 1.362877 | 0.114911  | 0.402024  | 1.000      |
| 171  | REACTOME_TOLL LIKE RECEPTOR_TLR1_TLR2_CASCADE     | 8    | 0.548196 | 1.361252 | 0.119829  | 0.403425  | 1.000      |
| 172  | GOBP-RESPONSE_TO_LIPID                            | 19   | 0.440622 | 1.359410 | 0.102394  | 0.405305  | 1.000      |
| 173  | REACTOME_SIGNALING_BY_RECEPTOR_TYROSINE_KINASES   | 26   | 0.411548 | 1.357700 | 0.105721  | 0.406869  | 1.000      |
| 174  | GOBP-POSITIVE-REGULATION_OF_TRANSPERASE_ACTIVITY  | 20   | 0.426411 | 1.357673 | 0.110115  | 0.404586  | 1.000      |
| 175  | REACTOME_CYTOKINE_SIGNALING_IN_IMMUNE_SYSTEM      | 21   | 0.418228 | 1.357347 | 0.095541  | 0.402929  | 1.000      |
| 176  | GOBP-REGULATION_OF_SYSTEM_PROCESS                 | 18   | 0.445123 | 1.355734 | 0.107527  | 0.404441  | 1.000      |
| 177  | GOBP-BIOLOGICAL_ADHESION                          | 19   | 0.431715 | 1.355368 | 0.114213  | 0.403013  | 1.000      |
| 178  | REACTOME_TOLL LIKE RECEPTOR_9_TLR9_CASCADE        | 8    | 0.548196 | 1.354986 | 0.118477  | 0.401524  | 1.000      |
| 179  | GOBP-REGULATION_OF_IMMUNE_SYSTEM_PROCESS          | 21   | 0.425941 | 1.354439 | 0.122581  | 0.400468  | 1.000      |
| 180  | GOBP-CELL_ACTIVATION                              | 21   | 0.423276 | 1.350968 | 0.115183  | 0.405431  | 1.000      |
| 181  | GOBP-MUSCLE_SYSTEM_PROCESS                        | 9    | 0.535406 | 1.346895 | 0.127168  | 0.411836  | 1.000      |
| 182  | REACTOME_TOLL LIKE RECEPTOR_CASCADES              | 8    | 0.548196 | 1.345482 | 0.123769  | 0.412702  | 1.000      |
| 183  | GOBP-CELLULAR_RESPONSE_TO_ORGANIC_CYCLIC_COMPOUND | 13   | 0.483889 | 1.345478 | 0.119522  | 0.410459  | 1.000      |
| 184  | GOBP-CELLULAR_LIPID_METABOLIC_PROCESS             | 7    | 0.567552 | 1.343670 | 0.132267  | 0.412495  | 1.000      |
| 185  | GOBP-ANIMAL_ORGAN_MORPHOGENESIS                   | 12   | 0.523845 | 1.339686 | 0.127717  | 0.413986  | 1.000      |
| 186  | GOBP-POSITIVE-REGULATION_OF_ANION_TRANSPORT       | 9    | 0.485941 | 1.342009 | 0.124128  | 0.417229  | 1.000      |
| 187  | GOBP-DENDRITE_MORPHOGENESIS                       | 6    | 0.609136 | 1.339594 | 0.116864  | 0.415200  | 1.000      |
| 188  | GOBP-NEGATIVE-REGULATION_OF_CELL_DEVELOPMENT      | 6    | 0.597567 | 1.338643 | 0.142857  | 0.415158  | 1.000      |
| 189  | GOBP-AGING                                        | 13   | 0.478849 | 1.338337 | 0.098886  | 0.413548  | 1.000      |
| 190  | GOBP-POSITIVE-REGULATION_OF_SMALL_MOLECULE_MET... | 5    | 0.626517 | 1.337757 | 0.117647  | 0.412663  | 1.000      |
| 191  | GOBP-POSITIVE-REGULATION_OF_PHOSPHATIDYLINOSIT... | 5    | 0.640491 | 1.335813 | 0.106481  | 0.414744  | 1.000      |
| 192  | GOBP-REGULATION_OF_CELL_DEVELOPMENT               | 15   | 0.457587 | 1.330442 | 0.124332  | 0.418799  | 1.000      |
| 193  | GOBP-POSITIVE-REGULATION_OF_GENE_EXPRESSION       | 16   | 0.449029 | 1.328050 | 0.131613  | 0.427672  | 1.000      |
| 194  | GOBP-PEPTIDYL_TYROSINE_MODIFICATION               | 10   | 0.505245 | 1.327831 | 0.139535  | 0.426020  | 1.000      |
| 195  | REACTOME_MYD88_INDEPENDENT_TLR4_CASCADE           | 8    | 0.548196 | 1.326410 | 0.127479  | 0.427070  | 1.000      |
| 196  | GOBP-CELL_CELL_JUNCTION_ORGANIZATION              | 6    | 0.578863 | 1.326052 | 0.140741  | 0.425630  | 1.000      |
| 197  | GOBP-CYTOSKELETON_ORGANIZATION                    | 11   | 0.486544 | 1.325712 | 0.139860  | 0.424272  | 1.000      |
| 198  | GOBP-CIRCADIAN_REGULATION_OF_GENE_EXPRESSION      | 5    | 0.638993 | 1.325358 | 0.125387  | 0.426849  | 1.000      |
| 199  | GOBP-NEGATIVE-REGULATION_OF_PEPTIDASE_ACTIVITY    | 6    | 0.583218 | 1.322887 | 0.135878  | 0.426422  | 1.000      |
| 200  | GOBP-REGULATION_OF_DEVELOPMENTAL_GROWTH           | 9    | 0.512722 | 1.317824 | 0.154596  | 0.436173  | 1.000      |
| 201  | GOBP-REGULATION_OF_CELL_CYCLE                     | 13   | 0.466994 | 1.317583 | 0.153215  | 0.434634  | 1.000      |
| 202  | GOBP-REGULATION_OF_VESICLE_MEDIATED_TRANSPORT     | 12   | 0.472274 | 1.317058 | 0.144847  | 0.433619  | 1.000      |
| 203  | REACTOME_NUCLEAR_EVENTS_KINASE_AND_TRANSCRIPTI... | 11   | 0.490012 | 1.316712 | 0.160443  | 0.432249  | 1.000      |
| 204  | GOBP-IMMUNE_EFFECTOR_PROCESS                      | 10   | 0.491873 | 1.313193 | 0.153619  | 0.437955  | 1.000      |
| 205  | GOBP-PEPTIDYL_AMINO_ACID_MODIFICATION             | 22   | 0.405121 | 1.311419 | 0.150524  | 0.439718  | 1.000      |
| 206  | GOBP-NEGATIVE-REGULATION_OF_ANION_TRANSPORT       | 8    | 0.531564 | 1.308292 | 0.145533  | 0.444595  | 1.000      |
| 207  | GOBP-NEGATIVE-REGULATION_OF_KINASE_ACTIVITY       | 5    | 0.616901 | 1.307733 | 0.142410  | 0.443731  | 1.000      |
| 208  | GOBP-POSITIVE-REGULATION_OF_RESPONSE_TO_EXTERN... | 9    | 0.509486 | 1.305695 | 0.130682  | 0.446492  | 1.000      |
| 209  | GOBP_FC_EPSILON_RECEPTOR_SIGNALING_PATHWAY        | 7    | 0.546725 | 1.304911 | 0.150585  | 0.446127  | 1.000      |
| 210  | GOBP-RESPONSE_TO ABIOTIC STIMULUS                 | 27   | 0.391948 | 1.303733 | 0.150127  | 0.446530  | 1.000      |
| 211  | GOBP-CIRCADIAN_RHYTHM                             | 13   | 0.467047 | 1.302695 | 0.151099  | 0.446720  | 1.000      |
| 212  | GOBP-POSITIVE-REGULATION_OF_DEVELOPMENTAL_PROCESS | 32   | 0.378183 | 1.301815 | 0.144623  | 0.446595  | 1.000      |

Continuation of Table S16

| NAME | ID                                                | SIZE          | ES | NES      | NOM.p.val | FDR.q.val | FWER.p.val |
|------|---------------------------------------------------|---------------|----|----------|-----------|-----------|------------|
| 213  | GOBP-AMERBODAL-TYPE-CELL-MIGRATION                | GO-0001667    | 11 | 0.479249 | 1.301809  | 0.155492  | 0.444520   |
| 214  | GOBP-CELLULAR-RESPONSE-TO-BIOTIC-STIMULUS         | GO-0071216    | 8  | 0.528909 | 1.300663  | 0.155340  | 0.445004   |
| 215  | GOBP-RESPONSE-TO-METAL-ION                        | GO-0010038    | 15 | 0.438684 | 1.300163  | 0.146405  | 0.444211   |
| 216  | GOBP-MAPK-CASCADE                                 | GO-0000165    | 18 | 0.427742 | 1.296140  | 0.150633  | 0.451464   |
| 217  | GOBP-MAINTENANCE-OF-LOCATION                      | GO-0051235    | 7  | 0.549026 | 1.295737  | 0.182891  | 0.450090   |
| 218  | GOBP-REGULATION-OF-EPITHELIAL-CELL-MIGRATION      | GO-0010632    | 6  | 0.572369 | 1.292844  | 0.151376  | 0.454628   |
| 219  | GOBP-MORPHOGENESIS-OF-AN-EPITHELIUM               | GO-0002009    | 6  | 0.568842 | 1.290065  | 0.156923  | 0.458745   |
| 220  | GOBP-CELLULAR-RESPONSE-TO-MOLECULE-OF-BACTERIA... | GO-0071219    | 8  | 0.528909 | 1.287259  | 0.159884  | 0.462789   |
| 221  | REACTOME-FC-EPSILON-RECEPTOR-FCERL-SIGNALING      | R-RNO-2454202 | 7  | 0.546725 | 1.285485  | 0.175809  | 0.465018   |
| 222  | HALLMARK-P13K-AKT-MTOR-SIGNALING                  | M5923         | 6  | 0.584171 | 1.284133  | 0.162003  | 0.466143   |
| 223  | GOBP-NEGATIVE-REGULATION-OF-TRANSFERASE-ACTIVITY  | GO-0051348    | 5  | 0.616901 | 1.279802  | 0.155146  | 0.474391   |
| 224  | GOBP-NEGATIVE-REGULATION-OF-LIPID-METABOLIC-PR... | GO-0045833    | 5  | 0.596416 | 1.277023  | 0.151033  | 0.478635   |
| 225  | GOBP-LEUKOCYTE-MEDIATED-IMMUNITY                  | GO-0002443    | 7  | 0.544984 | 1.276300  | 0.186289  | 0.478114   |
| 226  | GOBP-BIOLOGICAL-PROCESS-INVOLVED-IN-SYMBIOTIC-... | GO-004440     | 11 | 0.468690 | 1.276127  | 0.187151  | 0.476431   |
| 227  | GOBP-NEGATIVE-REGULATION-OF-PROTEIN-MODIFICATI... | GO-0031400    | 10 | 0.488954 | 1.275801  | 0.167147  | 0.475111   |
| 228  | GOBP-RESPIRATORY-SYSTEM-DEVELOPMENT               | GO-0060541    | 6  | 0.562539 | 1.275423  | 0.155750  | 0.473829   |
| 229  | GOBP-REGULATION-OF-RESPONSE-TO-EXTERNAL-STIMULUS  | GO-0032101    | 15 | 0.440306 | 1.274191  | 0.166223  | 0.474702   |
| 230  | GOBP-PHAGOCYTOSIS                                 | GO-0006909    | 5  | 0.596194 | 1.272247  | 0.178102  | 0.477093   |
| 231  | GOBP-REGULATION-OF-IMMUNE-RESPONSE                | GO-0050776    | 12 | 0.463542 | 1.269733  | 0.178025  | 0.480603   |
| 232  | GOBP-CELLULAR-MACROMOLECULE-CATABOLIC-PROCESS     | GO-0044265    | 6  | 0.565084 | 1.266547  | 0.186930  | 0.485381   |
| 233  | GOBP-POSITIVE-REGULATION-OF-IMMUNE-RESPONSE       | GO-0050778    | 9  | 0.494630 | 1.265115  | 0.183616  | 0.486473   |
| 234  | GOBP-IMMUNE-SYSTEM-DEVELOPMENT                    | GO-0002520    | 17 | 0.421271 | 1.261054  | 0.198693  | 0.493671   |
| 235  | GOBP-RESPONSE-TO-OXYGEN-CONTAINING-COMPOUND       | GO-1901700    | 39 | 0.363294 | 1.259069  | 0.182578  | 0.496209   |
| 236  | GOBP-EPIDERMIS-DEVELOPMENT                        | GO-0008544    | 5  | 0.592191 | 1.255675  | 0.186414  | 0.501873   |
| 237  | GOBP-RESPONSE-TO-STARVATION                       | GO-0042594    | 5  | 0.599538 | 1.255592  | 0.167428  | 0.499952   |
| 238  | REACTOME-ONCOGENIC-MAPK-SIGNALING                 | R-HSA-6802957 | 5  | 0.579567 | 1.255411  | 0.160247  | 0.498307   |
| 239  | GOBP-REGULATION-OF-SECRETION                      | GO-0051046    | 14 | 0.440896 | 1.254781  | 0.198639  | 0.497608   |
| 240  | GOBP-REGULATION-OF-PROTEIN-LOCALIZATION-TO-CEL... | GO-1904375    | 6  | 0.556410 | 1.252942  | 0.175150  | 0.499745   |
| 241  | GOBP-PROTEIN-KINASE-B-SIGNALING                   | GO-0043491    | 6  | 0.553920 | 1.249983  | 0.198519  | 0.504670   |
| 242  | GOBP-LIPID-BIOSYNTHETIC-PROCESS                   | GO-0008610    | 6  | 0.551339 | 1.248703  | 0.177273  | 0.505417   |
| 243  | GOBP-GENERATION-OF-PRECURSOR-METABOLITES-AND-E... | GO-0006091    | 5  | 0.591884 | 1.247717  | 0.175655  | 0.505510   |
| 244  | GOBP-EXOCYTOSIS                                   | GO-0006887    | 11 | 0.467386 | 1.247404  | 0.194602  | 0.504197   |
| 245  | GOBP-SYNAPTIC-TRANSMISSION-GLUTAMATERGIC          | GO-0035249    | 13 | 0.443172 | 1.245997  | 0.199450  | 0.505260   |
| 246  | GOBP-CELL-CELL-SIGNALING-BY-WNT                   | GO-0198738    | 7  | 0.532574 | 1.245715  | 0.199702  | 0.503792   |
| 247  | GOBP-TISSUE-MIGRATION                             | GO-0090130    | 9  | 0.492764 | 1.245689  | 0.192253  | 0.501841   |
| 248  | GOBP-CELLULAR-RESPONSE-TO-STARVATION              | GO-0009267    | 5  | 0.599538 | 1.245307  | 0.197550  | 0.500686   |
| 249  | HALLMARK-ALLOGRAFT-REJECTION                      | M5950         | 7  | 0.523029 | 1.244982  | 0.190407  | 0.499321   |
| 250  | GOBP-RESPONSE-TO-NICOTINE                         | GO-0035094    | 7  | 0.520972 | 1.244914  | 0.196221  | 0.497497   |
| 251  | GOBP-RESPONSE-TO-HEAT                             | GO-0009408    | 7  | 0.526650 | 1.244487  | 0.207101  | 0.496383   |
| 252  | GOBP-REGULATION-OF-LIPID-BIOSYNTHETIC-PROCESS     | GO-0046890    | 6  | 0.551339 | 1.240934  | 0.206186  | 0.502223   |
| 253  | GOBP-NUCLEOBASE-CONTAINING-SMALL-MOLECULE-META... | GO-0055086    | 6  | 0.562170 | 1.240793  | 0.171303  | 0.500524   |
| 254  | GOBP-DENDRITE-DEVELOPMENT                         | GO-0016358    | 9  | 0.485690 | 1.239314  | 0.200577  | 0.501961   |
| 255  | GOBP-NEGATIVE-REGULATION-OF-PROTEOLYSIS           | GO-0045861    | 8  | 0.498687 | 1.238821  | 0.198839  | 0.501059   |

Continuation of Table S16

| NAME | ID                                                | SIZE | ES       | NES      | NOM.p.val | FDR.q.val | FWER.p.val |
|------|---------------------------------------------------|------|----------|----------|-----------|-----------|------------|
| 256  | GOBP-REGULATION-OF-MUSCLE-CELL-DIFFERENTIATION    | 6    | 0.546523 | 1.237255 | 0.196839  | 0.502591  | 1.000      |
| 257  | GOBP-RESPONSE-TO-TEMPERATURE-STIMULUS             | 9    | 0.491301 | 1.235251 | 0.219686  | 0.505296  | 1.000      |
| 258  | GOBP-RESPONSE-TO-WOUNDING                         | 15   | 0.419366 | 1.232915 | 0.213406  | 0.508311  | 1.000      |
| 259  | GOBP-SENSORY-ORGAN-DEVELOPMENT                    | 8    | 0.497150 | 1.231893 | 0.208824  | 0.508529  | 1.000      |
| 260  | HALLMARK-UV-RESPONSE-UP                           | 5    | 0.582492 | 1.231775 | 0.184664  | 0.506828  | 1.000      |
| 261  | GOBP-REGULATION-OF-LIPID-LOCALIZATION             | 5    | 0.585014 | 1.230809 | 0.209302  | 0.507033  | 1.000      |
| 262  | GOBP-CELLULAR-HOMEOSTASIS                         | 18   | 0.399758 | 1.230119 | 0.207124  | 0.506487  | 1.000      |
| 263  | GOBP-CALCIUM-MEDIATED-SIGNALING                   | 10   | 0.472657 | 1.229017 | 0.231760  | 0.507055  | 1.000      |
| 264  | GOBP-GLIOGENESIS                                  | 12   | 0.443824 | 1.226090 | 0.215924  | 0.511621  | 1.000      |
| 265  | GOBP-MUSCLE-CELL-DIFFERENTIATION                  | 10   | 0.467184 | 1.225729 | 0.216939  | 0.510547  | 1.000      |
| 266  | GOBP-NEGATIVE-REGULATION-OF-NUCLEOBASE-CONTAIN... | 13   | 0.432858 | 1.222027 | 0.236209  | 0.516921  | 1.000      |
| 267  | GOBP-EPITHELIAL-DEVELOPMENT                       | 15   | 0.411775 | 1.221909 | 0.215405  | 0.515219  | 1.000      |
| 268  | GOBP-NEGATIVE-REGULATION-OF-BINDING               | 6    | 0.53769  | 1.220617 | 0.219178  | 0.516132  | 1.000      |
| 269  | GOBP-NEGATIVE-REGULATION-OF-CELL-DEATH            | 22   | 0.382921 | 1.220571 | 0.209476  | 0.514344  | 1.000      |
| 270  | GOBP-ENDOCYTOSIS                                  | 8    | 0.485744 | 1.219781 | 0.245763  | 0.514211  | 1.000      |
| 271  | REACTOME-CREB1-PHOSPHORYLATION-THROUGH-NMDA-RE... | 8    | 0.492374 | 1.218431 | 0.221264  | 0.515310  | 1.000      |
| 272  | GOBP-MYELOID-LEUKOCYTE-ACTIVATION                 | 8    | 0.498349 | 1.217270 | 0.229885  | 0.515757  | 1.000      |
| 273  | GOBP-POSITIVE-REGULATION-OF-GLIOGENESIS           | 5    | 0.581865 | 1.216961 | 0.208889  | 0.514500  | 1.000      |
| 274  | GOBP-REGULATION-OF-GLIOGENESIS                    | 5    | 0.581865 | 1.216936 | 0.210031  | 0.512683  | 1.000      |
| 275  | GOBP-VASCULATURE-DEVELOPMENT                      | 17   | 0.403699 | 1.214326 | 0.218016  | 0.516391  | 1.000      |
| 276  | GOBP-REGULATION-OF-CIRCADIAN-RHYTHM               | 7    | 0.515882 | 1.212905 | 0.229607  | 0.517650  | 1.000      |
| 277  | GOBP-PROTEIN-CONTAINING-COMPLEX-SUBUNIT-ORGANI... | 14   | 0.422913 | 1.211492 | 0.206199  | 0.518871  | 1.000      |
| 278  | GOBP-IMMUNE-RESPONSE-REGULATING-SIGNALING-PATHWAY | 8    | 0.486627 | 1.209947 | 0.232353  | 0.520420  | 1.000      |
| 279  | GOBP-NEGATIVE-REGULATION-OF-TRANSCRIPTION-BY-R... | 10   | 0.453957 | 1.208252 | 0.224688  | 0.522156  | 1.000      |
| 280  | GOBP-FC-RECEPTOR-SIGNALING-PATHWAY                | 8    | 0.486627 | 1.205783 | 0.235123  | 0.526148  | 1.000      |
| 281  | GOBP-CELL-CELL-ADHESION                           | 14   | 0.415307 | 1.204427 | 0.242991  | 0.527179  | 1.000      |
| 282  | GOBP-NEUROINFLAMMATORY-RESPONSE                   | 5    | 0.573692 | 1.203893 | 0.228482  | 0.526408  | 1.000      |
| 283  | REACTOME-G-ALPHA-I-SIGNALING-EVENTS               | 18   | 0.389164 | 1.203531 | 0.228000  | 0.525298  | 1.000      |
| 284  | GOBP-POSITIVE-REGULATION-OF-IMMUNE-SYSTEM-PROCESS | 18   | 0.391003 | 1.203228 | 0.245235  | 0.524112  | 1.000      |
| 285  | GOBP-POSITIVE-REGULATION-OF-PROTEIN-METABOLIC...  | 28   | 0.361105 | 1.201013 | 0.245211  | 0.527087  | 1.000      |
| 286  | GOBP-REGULATION-OF-TRANSPORT                      | 44   | 0.341687 | 1.200031 | 0.233129  | 0.527383  | 1.000      |
| 287  | GOBP-NEGATIVE-REGULATION-OF-RESPONSE-TO-STIMULUS  | 16   | 0.403143 | 1.196681 | 0.252964  | 0.532740  | 1.000      |
| 288  | GOBP-NEGATIVE-REGULATION-OF-BIOSYNTHETIC-PROCESS  | 13   | 0.427791 | 1.196112 | 0.240163  | 0.532252  | 1.000      |
| 289  | GOBP-REGULATION-OF-CELLULAR-RESPONSE-TO-STRESS    | 9    | 0.464100 | 1.195211 | 0.243243  | 0.532273  | 1.000      |
| 290  | GOBP-RESPONSE-TO-EXTRACELLULAR-STIMULUS           | 13   | 0.415206 | 1.194894 | 0.252604  | 0.531049  | 1.000      |
| 291  | GOBP-REGULATION-OF-PROTEIN-LOCALIZATION-TO-MEM... | 7    | 0.500774 | 1.194333 | 0.247344  | 0.530510  | 1.000      |
| 292  | REACTOME-ADAPTIVE-IMMUNE-SYSTEM                   | 9    | 0.471049 | 1.192328 | 0.250350  | 0.532769  | 1.000      |
| 293  | REACTOME-INTERLEUKIN-17-SIGNALING                 | 6    | 0.529888 | 1.188046 | 0.240713  | 0.540449  | 1.000      |
| 294  | GOBP-ANATOMICAL-STRUCTURE-FORMATION-INVOLVED-I... | 20   | 0.376960 | 1.187418 | 0.251664  | 0.539973  | 1.000      |
| 295  | GOBP-REGULATION-OF-NEUROGENESIS                   | 14   | 0.413505 | 1.186522 | 0.236559  | 0.540083  | 1.000      |
| 296  | GOBP-REGULATION-OF-ENDOCYTOSIS                    | 6    | 0.529622 | 1.186454 | 0.256757  | 0.538483  | 1.000      |
| 297  | GOBP-NEGATIVE-REGULATION-OF-RESPONSE-TO-EXTERN... | 5    | 0.550816 | 1.186100 | 0.243865  | 0.537413  | 1.000      |
| 298  | GOBP-REGULATION-OF-WNT-SIGNALING-PATHWAY          | 5    | 0.542501 | 1.183165 | 0.259601  | 0.541996  | 1.000      |



Continuation of Table S16

| NAME                                                  | ID            | SIZE | ES       | NES      | NOM.p.val | FDR.q.val | FWER.p.val |
|-------------------------------------------------------|---------------|------|----------|----------|-----------|-----------|------------|
| 299 GOBP-NEGATIVE-REGULATION-OF-INTRACELLULAR-SIGN... | GO:1902532    | 7    | 0.492611 | 1.180187 | 0.253201  | 0.546695  | 1.000      |
| 300 GOBP-OSSIFICATION                                 | GO:0001503    | 9    | 0.455032 | 1.179942 | 0.266003  | 0.545307  | 1.000      |
| 301 GOBP-RESPONSE-TO-CYTOKINE                         | GO:0034097    | 23   | 0.359814 | 1.177830 | 0.272050  | 0.547783  | 1.000      |
| 302 GOBP-APOPTOTIC-SIGNALING-PATHWAY                  | GO:0097190    | 15   | 0.403423 | 1.176062 | 0.248340  | 0.549870  | 1.000      |
| 303 GOBP-CELL-SURFACE-RECEPTOR-SIGNALING-PATHWAY.I... | GO:1905114    | 15   | 0.396832 | 1.174149 | 0.253012  | 0.551920  | 1.000      |
| 304 GOBP-APOPTOTIC-PROCESS                            | GO:0006915    | 35   | 0.339034 | 1.173946 | 0.268382  | 0.550526  | 1.000      |
| 305 GOBP-IN-UTERO-EMBRYONIC-DEVELOPMENT               | GO:0001701    | 8    | 0.476621 | 1.171853 | 0.279346  | 0.553468  | 1.000      |
| 306 GOBP-CELLULAR-MACROMOLECULE-LOCALIZATION          | GO:0070727    | 21   | 0.367995 | 1.169685 | 0.260638  | 0.556296  | 1.000      |
| 307 GOBP-GLIAL-CELL-DIFFERENTIATION                   | GO:0010001    | 10   | 0.447063 | 1.167633 | 0.301653  | 0.563125  | 1.000      |
| 308 GOBP-POSITIVE-REGULATION-OF-DEVELOPMENTAL-GROWTH  | GO:0048639    | 8    | 0.474140 | 1.165329 | 0.288160  | 0.562248  | 1.000      |
| 309 GOBP-MYELOID-LEUKOCYTE-MEDIATED-IMMUNITY          | GO:0002444    | 6    | 0.519028 | 1.164971 | 0.282511  | 0.561272  | 1.000      |
| 310 GOBP-TUBE-MORPHOGENESIS                           | GO:0035239    | 15   | 0.401487 | 1.164474 | 0.294355  | 0.560555  | 1.000      |
| 311 GOBP-CELLULAR-RESPONSE-TO-ABIOTIC-STIMULUS        | GO:0071214    | 7    | 0.499442 | 1.164237 | 0.277126  | 0.559294  | 1.000      |
| 312 GOBP-CELL-ACTIVATION-INVOLVED-IN-IMMUNE-RESPONSE  | GO:0002263    | 6    | 0.519028 | 1.163116 | 0.275510  | 0.559941  | 1.000      |
| 313 GOBP-POSITIVE-REGULATION-OF-CELL-DIFFERENTIATION  | GO:0045597    | 27   | 0.348091 | 1.156402 | 0.286076  | 0.572871  | 1.000      |
| 314 GOBP-MYOTUBE-DIFFERENTIATION                      | GO:0014902    | 5    | 0.549092 | 1.155885 | 0.280063  | 0.572102  | 1.000      |
| 315 GOBP-FAT-CELL-DIFFERENTIATION                     | GO:0045444    | 9    | 0.453397 | 1.15280  | 0.279137  | 0.571640  | 1.000      |
| 316 GOBP-SECOND-MESSENGER-MEDIATED-SIGNALING          | GO:0019932    | 16   | 0.393316 | 1.154762 | 0.289438  | 0.570992  | 1.000      |
| 317 GOBP-POSITIVE-REGULATION-OF-SMOOTH-MUSCLE-CELL... | GO:0048661    | 5    | 0.548366 | 1.154630 | 0.276074  | 0.569493  | 1.000      |
| 318 GOBP-DEVELOPMENTAL-MATURATION                     | GO:0021700    | 5    | 0.550425 | 1.153933 | 0.267296  | 0.569121  | 1.000      |
| 319 GOBP-NEGATIVE-REGULATION-OF-CYSTEINE-TYPE-ENDO... | GO:2000117    | 5    | 0.547560 | 1.153016 | 0.271772  | 0.569349  | 1.000      |
| 320 GOBP-TUBE-DEVELOPMENT                             | GO:0035295    | 18   | 0.357352 | 1.152265 | 0.294584  | 0.569122  | 1.000      |
| 321 GOBP-TRANSMEMBRANE-RECEPTOR-PROTEIN-SERINE-THR... | GO:0007178    | 6    | 0.503166 | 1.147195 | 0.294210  | 0.578417  | 1.000      |
| 322 GOBP-REGULATION-OF-ORGANELLE-ORGANIZATION         | GO:0033043    | 14   | 0.401040 | 1.145773 | 0.302778  | 0.579823  | 1.000      |
| 323 GOBP-REGULATION-OF-VASCULAR-ASSOCIATED-SMOOTH...  | GO:1904705    | 5    | 0.548016 | 1.144649 | 0.284211  | 0.580348  | 1.000      |
| 324 GOBP-REGULATION-OF-LIPID-METABOLIC-PROCESS        | GO:0019216    | 7    | 0.491135 | 1.144137 | 0.309838  | 0.579666  | 1.000      |
| 325 GOBP-DEVELOPMENTAL-CELL-GROWTH                    | GO:0048588    | 5    | 0.534123 | 1.143479 | 0.296703  | 0.579301  | 1.000      |
| 326 GOBP-POSITIVE-REGULATION-OF-NEUROGENESIS          | GO:0050769    | 12   | 0.415343 | 1.141462 | 0.300135  | 0.581749  | 1.000      |
| 327 GOBP-POSITIVE-REGULATION-OF-TRANSPORT             | GO:0051050    | 26   | 0.340548 | 1.139583 | 0.312339  | 0.584002  | 1.000      |
| 328 GOBP-POSITIVE-REGULATION-OF-NERVOUS-SYSTEM.DEV... | GO:0051962    | 12   | 0.415343 | 1.138847 | 0.310014  | 0.583898  | 1.000      |
| 329 GOBP-ORGANOPHOSPHATE-METABOLIC-PROCESS            | GO:0019637    | 7    | 0.477045 | 1.137561 | 0.293605  | 0.588831  | 1.000      |
| 330 REACTOME-NEUTROPHIL-DEGRANULATION                 | R-RNO-6798695 | 6    | 0.519028 | 1.132963 | 0.316788  | 0.593051  | 1.000      |
| 331 GOBP-POSITIVE-REGULATION-OF-TRANSCRIPTION-BY-R... | GO:0045944    | 24   | 0.344203 | 1.128876 | 0.334180  | 0.600161  | 1.000      |
| 332 GOBP-POSITIVE-REGULATION-OF-CELL-DEVELOPMENT      | GO:0010720    | 12   | 0.415343 | 1.128726 | 0.312329  | 0.598649  | 1.000      |
| 333 GOBP-LEUKOCYTE-CELL-CELL-ADHESION                 | GO:0007159    | 6    | 0.505302 | 1.128426 | 0.308908  | 0.597555  | 1.000      |
| 334 GOBP-REGULATION-OF-ENDOTHELIAL-CELL-MIGRATION     | GO:0010594    | 5    | 0.538282 | 1.128186 | 0.310811  | 0.596252  | 1.000      |
| 335 GOBP-ENDOTHELIAL-CELL-MIGRATION                   | GO:0043542    | 8    | 0.453348 | 1.125762 | 0.318248  | 0.599534  | 1.000      |
| 336 GOBP-EPITHELIAL-CELL-PROLIFERATION                | GO:0050673    | 12   | 0.397316 | 1.122931 | 0.318560  | 0.603601  | 1.000      |
| 337 GOBP-POSITIVE-REGULATION-OF-PRIMI-NA-TRANSCRI...  | GO:1902895    | 7    | 0.465476 | 1.122829 | 0.317578  | 0.602025  | 1.000      |
| 338 GOBP-ESTABLISHMENT-OF-PROTEIN-LOCALIZATION-TO...  | GO:0072594    | 6    | 0.508250 | 1.122642 | 0.330838  | 0.600648  | 1.000      |
| 339 GOBP-REGULATION-OF-NERVOUS-SYSTEM-DEVELOPMENT     | GO:0051960    | 15   | 0.382404 | 1.122603 | 0.321990  | 0.598947  | 1.000      |
| 340 GOBP-LIPID-LOCALIZATION                           | GO:0010876    | 10   | 0.423531 | 1.122448 | 0.337589  | 0.597504  | 1.000      |
| 341 GOBP-ENDOTHELIAL-CELL-PROLIFERATION               | GO:0001935    | 8    | 0.452199 | 1.122329 | 0.305233  | 0.596061  | 1.000      |

Continuation of Table S16

| NAME | ID                                                | SIZE | ES        | NES      | NOM.p.val | FDR.q.val | FWER.p.val |
|------|---------------------------------------------------|------|-----------|----------|-----------|-----------|------------|
| 342  | GOBP-ACTIVATION_OF_IMMUNE_RESPONSE                | 5    | 0.527031  | 1.119666 | 0.318797  | 0.599965  | 1.000      |
| 343  | GOBP-RESPONSE_TO_PEPTIDE                          | 18   | 0.364172  | 1.114022 | 0.318003  | 0.610077  | 1.000      |
| 344  | GOBP-CELLULAR_RESPONSE_TO_PEPTIDE                 | 13   | 0.388033  | 1.112072 | 0.346829  | 0.612526  | 1.000      |
| 345  | GOBP-POSITIVE_REGULATION_OF_DNA_BINDING_TRANSC... | 10   | 0.431486  | 1.112050 | 0.351801  | 0.610813  | 1.000      |
| 346  | GOBP-REGULATION_OF_BINDING                        | 11   | 0.407816  | 1.111845 | 0.338889  | 0.609479  | 1.000      |
| 347  | GOBP-BLOOD_VESSEL_ENDOTHELIAL_CELL_MIGRATION      | 8    | 0.453348  | 1.111832 | 0.334290  | 0.607756  | 1.000      |
| 348  | GOBP-CHROMOSOME_ORGANIZATION                      | 6    | 0.498133  | 1.111392 | 0.323881  | 0.607034  | 1.000      |
| 349  | GOBP-ENZYMELINKED-RECEPTOR_PROTEIN-SIGNALING...   | 24   | 0.344563  | 1.111224 | 0.319588  | 0.605622  | 1.000      |
| 350  | GOBP-POSITIVE_REGULATION_OF_EPITHELIAL_CELL_M...  | 5    | 0.522837  | 1.110860 | 0.347894  | 0.604663  | 1.000      |
| 351  | GOBP-MUSCLE_ORGAN_DEVELOPMENT                     | 9    | 0.430380  | 1.107472 | 0.336606  | 0.610093  | 1.000      |
| 352  | REACTOME_HEMOSTASIS                               | 14   | 0.381172  | 1.106388 | 0.326693  | 0.610564  | 1.000      |
| 353  | GOBP-ERBB-SIGNALING_PATHWAY                       | 5    | 0.533063  | 1.106259 | 0.336350  | 0.609103  | 1.000      |
| 354  | GOBP-NEGATIVE_REGULATION_OF_NERVOUS_SYSTEM_DEV... | 5    | 0.522341  | 1.103815 | 0.336907  | 0.612493  | 1.000      |
| 355  | REACTOME_NGF_STIMULATED_TRANSCRIPTION             | 9    | 0.430380  | 1.103376 | 0.342291  | 0.611719  | 1.000      |
| 356  | GOBP-EMBRYO_DEVELOPMENT_ENDING_IN_BIRTH_OR_EGG... | 9    | 0.431500  | 1.100904 | 0.354749  | 0.615180  | 1.000      |
| 357  | GOBP-NEGATIVE_REGULATION_OF_LOCOMOTION            | 5    | 0.518707  | 1.09563  | 0.356391  | 0.616141  | 1.000      |
| 358  | GOBP-SMOOTH_MUSCLE_CELL_PROLIFERATION             | 6    | 0.489239  | 1.098565 | 0.349558  | 0.616509  | 1.000      |
| 359  | GOBP-PROTEOLYSIS                                  | 17   | 0.357695  | 1.097549 | 0.343791  | 0.616739  | 1.000      |
| 360  | GOBP-SIGNAL_RELEASE                               | 14   | 0.385764  | 1.097515 | 0.335655  | 0.615123  | 1.000      |
| 361  | GOBP-RESPONSE_TO_RADIATION                        | 13   | 0.386176  | 1.095649 | 0.356383  | 0.617285  | 1.000      |
| 362  | GOBP-MUSCLE_STRUCTURE_DEVELOPMENT                 | 16   | 0.367559  | 1.095438 | 0.341623  | 0.616122  | 1.000      |
| 363  | GOBP-RESPONSE_TO_INORGANIC_SUBSTANCE              | 19   | 0.348756  | 1.088134 | 0.337317  | 0.629541  | 1.000      |
| 364  | GOBP-POSITIVE_REGULATION_OF_SIGNALING             | 34   | 0.312732  | 1.087711 | 0.367470  | 0.628748  | 1.000      |
| 365  | GOBP-POSITIVE_REGULATION_OF_CELLULAR_PROTEIN_L... | 10   | 0.416232  | 1.086685 | 0.396501  | 0.629095  | 1.000      |
| 366  | GOBP-POSITIVE_REGULATION_OF_CATALYTIC_ACTIVITY    | 30   | 0.313789  | 1.081676 | 0.357500  | 0.637711  | 1.000      |
| 367  | GOBP-POSITIVE_REGULATION_OF_CELL_PROJECTION_OR... | 7    | 0.466446  | 1.086685 | 0.396501  | 0.639317  | 1.000      |
| 368  | GOBP-RESPONSE_TO_LIGHT_STIMULUS                   | 11   | 0.400435  | 1.078758 | 0.349933  | 0.640086  | 1.000      |
| 369  | GOBP-REGULATION_OF_TRANSMEMBRANE_TRANSPORT        | 23   | 0.336479  | 1.077926 | 0.359335  | 0.640068  | 1.000      |
| 370  | GOBP-PRLMIRNA_TRANSCRIPTION_BY_RNA_POLYMERASE_II  | 7    | 0.465476  | 1.077596 | 0.384844  | 0.638940  | 1.000      |
| 371  | GOBP-EMBRYONIC_MORPHOGENESIS                      | 6    | 0.481537  | 1.077177 | 0.364329  | 0.638069  | 1.000      |
| 372  | GOBP-MULTICELLULAR_ORGANISM_PROCESS               | 8    | 0.440811  | 1.073254 | 0.385475  | 0.644691  | 1.000      |
| 373  | GOBP-LOCOMOTORY_BEHAVIOR                          | 7    | 0.445776  | 1.072978 | 0.389630  | 0.643446  | 1.000      |
| 374  | GOBP-MONOCARBOXYLIC_ACID_METABOLIC_PROCESS        | 6    | 0.475344  | 1.072290 | 0.370753  | 0.643122  | 1.000      |
| 375  | GOBP-ACTIN_FILAMENT_BASED_PROCESS                 | 7    | 0.452026  | 1.064971 | 0.400000  | 0.656219  | 1.000      |
| 376  | GOBP-RESPONSE_TO_UV                               | 5    | 0.508481  | 1.064011 | 0.373846  | 0.656435  | 1.000      |
| 377  | GOBP-DENDRITIC_SPINE_DEVELOPMENT                  | 6    | 0.469681  | 1.062871 | 0.408511  | 0.657092  | 1.000      |
| 378  | GOBP-LOCOMOTION                                   | 31   | 0.314593  | 1.062725 | 0.387137  | 0.655611  | 1.000      |
| 379  | GOBP-REGULATION_OF_RECEPTOR_MEDIATED_ENDOCYTOSIS  | 5    | 0.4048259 | 1.060962 | 0.396947  | 0.657474  | 1.000      |
| 380  | GOBP-ENDOCRINE_SYSTEM_DEVELOPMENT                 | 6    | 0.462989  | 1.060483 | 0.402108  | 0.656745  | 1.000      |
| 381  | GOBP-POSITIVE_REGULATION_OF_CELL_GROWTH           | 6    | 0.473943  | 1.059006 | 0.389985  | 0.658255  | 1.000      |
| 382  | GOBP-CYTOKINE_MEDIATED_SIGNALING_PATHWAY          | 16   | 0.357563  | 1.058510 | 0.408488  | 0.657512  | 1.000      |
| 383  | REACTOME_NERVOUS_SYSTEM_DEVELOPMENT               | 15   | 0.366370  | 1.058065 | 0.400804  | 0.656659  | 1.000      |
| 384  | GOBP-DENDRITIC_SPINE_MORPHOGENESIS                | 5    | 0.504773  | 1.055511 | 0.407108  | 0.659997  | 1.000      |

Continuation of Table S16

| NAME | ID                                                | SIZE | ES       | NES      | NOM.p.val | FDR.q.val | FWER.p.val |
|------|---------------------------------------------------|------|----------|----------|-----------|-----------|------------|
| 385  | GOBP-REGULATION-OF-CELLULAR-PROTEIN-LOCALIZATION  | 12   | 0.386367 | 1.054114 | 0.424791  | 0.661222  | 1.000      |
| 386  | REACTOME.MAPK.FAMILY.SIGNALING.CASCADES           | 12   | 0.376086 | 1.053462 | 0.385773  | 0.660904  | 1.000      |
| 387  | GOBP-NEGATIVE-REGULATION-OF-ION-TRANSPORT         | 11   | 0.394235 | 1.051641 | 0.395512  | 0.662787  | 1.000      |
| 388  | REACTOME.BETA.CATENIN.INDEPENDENT.WNT.SIGNALING   | 5    | 0.487389 | 1.050013 | 0.387334  | 0.664455  | 1.000      |
| 389  | GOBP-LEUKOCYTE-DIFFERENTIATION                    | 15   | 0.358574 | 1.049430 | 0.400273  | 0.664020  | 1.000      |
| 390  | GOBP-REGULATION-OF-CYTOSKELETON-ORGANIZATION      | 5    | 0.492740 | 1.048578 | 0.411326  | 0.663915  | 1.000      |
| 391  | GOBP-STRIATED.MUSCLE-CELL-DIFFERENTIATION         | 9    | 0.410926 | 1.047798 | 0.422190  | 0.663912  | 1.000      |
| 392  | GOBP-REGULATION-OF-INFLAMMATORY-RESPONSE          | 7    | 0.443346 | 1.047142 | 0.394074  | 0.663428  | 1.000      |
| 393  | GOBP-REGULATION-OF-RESPONSE-TO-STRESS             | 19   | 0.341173 | 1.047023 | 0.410923  | 0.662021  | 1.000      |
| 394  | GOBP-ANATOMICAL-STRUCTURE.HOMEOSTASIS             | 7    | 0.451283 | 1.045383 | 0.433681  | 0.663678  | 1.000      |
| 395  | GOBP-MATERNAL-PROCESS-INVOLVED-IN-FEMALE-PREGN... | 5    | 0.504715 | 1.045235 | 0.424806  | 0.662300  | 1.000      |
| 396  | GOBP-MYELOID-CELL-DIFFERENTIATION                 | 13   | 0.366349 | 1.043979 | 0.401628  | 0.663160  | 1.000      |
| 397  | GOBP-OSTEOBLAST-DIFFERENTIATION                   | 5    | 0.498963 | 1.042697 | 0.416413  | 0.664087  | 1.000      |
| 398  | GOBP-RAS-PROTEIN-SIGNAL-TRANSDUCTION              | 5    | 0.492870 | 1.042666 | 0.402496  | 0.662497  | 1.000      |
| 399  | GOBP-PLATELET-ACTIVATION                          | 6    | 0.468289 | 1.041768 | 0.430250  | 0.662638  | 1.000      |
| 400  | GOBP-CELL-CELL-JUNCTION-ASSEMBLY                  | 5    | 0.485091 | 1.040883 | 0.429217  | 0.662671  | 1.000      |
| 401  | GOBP-TRANSMEMBRANE-RECEPTOR-PROTEIN-TYROSINE.K... | 19   | 0.332104 | 1.037489 | 0.404066  | 0.667992  | 1.000      |
| 402  | GOBP-LYMPHOCYTE-ACTIVATION                        | 9    | 0.401397 | 1.037332 | 0.430727  | 0.666633  | 1.000      |
| 403  | GOBP-PROTEIN-AUTOPHOSPHORYLATION                  | 5    | 0.496904 | 1.037102 | 0.427300  | 0.665426  | 1.000      |
| 404  | GOBP-REGULATION-OF-DEPENDENCE-RESPONSE            | 7    | 0.443346 | 1.034927 | 0.429608  | 0.668034  | 1.000      |
| 405  | REACTOME.EXTRA-NUCLEAR-ESTROGEN-SIGNALING         | 7    | 0.441011 | 1.033165 | 0.437500  | 0.669833  | 1.000      |
| 406  | GOBP-CELLULAR-RESPONSE-TO-NITROGEN-COMPOUND       | 20   | 0.331766 | 1.030252 | 0.439024  | 0.674103  | 1.000      |
| 407  | GOBP-HOMEOSTATIC-PROCESS                          | 31   | 0.304893 | 1.029128 | 0.442260  | 0.674585  | 1.000      |
| 408  | REACTOME.SIGNALING-BY-NTRKS                       | 18   | 0.331083 | 1.027240 | 0.450382  | 0.676653  | 1.000      |
| 409  | REACTOME.MAPK-TARGETS.NUCLEAR-EVENTS-MEDIATED-... | 5    | 0.494016 | 1.023955 | 0.441221  | 0.681471  | 1.000      |
| 410  | GOBP-REGULATION-OF-NERVOUS-SYSTEM-PROCESS         | 8    | 0.410960 | 1.021646 | 0.436496  | 0.684285  | 1.000      |
| 411  | REACTOME.INTERLEUKIN-4-AND-INTERLEUKIN-13-SIGN... | 8    | 0.416372 | 1.020253 | 0.439706  | 0.685488  | 1.000      |
| 412  | GOBP-RESPONSE-TO-ORGANIC-CYCLIC-COMPOUND          | 20   | 0.325243 | 1.016115 | 0.443734  | 0.692034  | 1.000      |
| 413  | REACTOME.INTRACELLULAR-SIGNALING-BY-SECOND.MES... | 15   | 0.344252 | 1.015788 | 0.453939  | 0.690962  | 1.000      |
| 414  | GOBP-BLOOD-VESSEL-MORPHOGENESIS                   | 14   | 0.352240 | 1.014332 | 0.451436  | 0.692131  | 1.000      |
| 415  | GOBP-CELLULAR-RESPONSE-TO-REACTIVE-OXYGEN-SPECIES | 7    | 0.426616 | 1.011869 | 0.478261  | 0.695409  | 1.000      |
| 416  | GOBP-PROTEIN-LOCALIZATION-TO-MEMBRANE             | 14   | 0.351339 | 1.008080 | 0.469003  | 0.701420  | 1.000      |
| 417  | GOBP-NEGATIVE-REGULATION-OF-APOPTOTIC-SIGNALIN... | 7    | 0.427422 | 1.007577 | 0.456973  | 0.700713  | 1.000      |
| 418  | GOBP-TISSUE-HOMEOSTASIS                           | 5    | 0.464039 | 1.004884 | 0.465544  | 0.704206  | 1.000      |
| 419  | GOBP-REGULATION-OF-PEPTIDASE-ACTIVITY             | 10   | 0.384852 | 1.004185 | 0.470027  | 0.703931  | 1.000      |
| 420  | GOBP-POSITIVE-REGULATION-OF-EPITHELIAL-CELL-PR... | 7    | 0.427957 | 1.003570 | 0.466476  | 0.703414  | 1.000      |
| 421  | REACTOME-CELLULAR-RESPONSES-TO-EXTERNAL-STIMULI   | 12   | 0.356991 | 1.001096 | 0.455540  | 0.706588  | 1.000      |
| 422  | REACTOME-RAS-ACTIVATION-UPON-CA2-INFLUX-THROUG... | 6    | 0.443347 | 0.998714 | 0.474926  | 0.709540  | 1.000      |
| 423  | GOBP-CELLULAR-RESPONSE-TO-INORGANIC-SUBSTANCE     | 11   | 0.367213 | 0.997991 | 0.471467  | 0.709387  | 1.000      |
| 424  | GOBP-REPRODUCTIVE-SYSTEM-DEVELOPMENT              | 6    | 0.449761 | 0.995980 | 0.511799  | 0.711593  | 1.000      |
| 425  | GOBP-ORGANIC-ACID-METABOLIC-PROCESS               | 7    | 0.422551 | 0.992550 | 0.482759  | 0.716673  | 1.000      |
| 426  | GOBP-NEURON-PROJECTION-ORGANIZATION               | 8    | 0.401315 | 0.992347 | 0.494876  | 0.715365  | 1.000      |
| 427  | GOBP-REGULATION-OF-FAT-CELL-DIFFERENTIATION       | 6    | 0.444888 | 0.992321 | 0.477134  | 0.713743  | 1.000      |

Continuation of Table S16

| NAME | ID                                                | SIZE | ES       | NES      | NOM.p.val | FDR.q.val | FWER.p.val |
|------|---------------------------------------------------|------|----------|----------|-----------|-----------|------------|
| 428  | REACTOME-SIGNALING-BY-WNT                         | 7    | 0.422309 | 0.991450 | 0.485163  | 0.713639  | 1.000      |
| 429  | GOBP-POSITIVE-REGULATION-OF-CELL-DEATH            | 19   | 0.323513 | 0.991026 | 0.487646  | 0.712826  | 1.000      |
| 430  | GOBP-INFLAMMATORY-RESPONSE                        | 12   | 0.353663 | 0.988831 | 0.488340  | 0.715356  | 1.000      |
| 431  | GOBP-CELLULAR-RESPONSE-TO-CHEMICAL-STRESS         | 7    | 0.426616 | 0.988541 | 0.496296  | 0.714223  | 1.000      |
| 432  | GOBP-REGULATION-OF-SYNAPTIC-TRANSMISSION-GLUTA... | 12   | 0.360982 | 0.986172 | 0.494006  | 0.716996  | 1.000      |
| 433  | GOBP-POSITIVE-REGULATION-OF-ION-TRANSPORT         | 17   | 0.332098 | 0.984433 | 0.498694  | 0.718805  | 1.000      |
| 434  | GOBP-POSITIVE-REGULATION-OF-CYTOKINE-PRODUCTION   | 7    | 0.409537 | 0.983649 | 0.488987  | 0.718721  | 1.000      |
| 435  | GOBP-REGULATION-OF-PROTEOLYSIS                    | 12   | 0.350844 | 0.980225 | 0.504155  | 0.723611  | 1.000      |
| 436  | GOBP-CARBOHYDRATE-DERIVATIVE-METABOLIC-PROCESS    | 7    | 0.411593 | 0.979137 | 0.505344  | 0.721437  | 1.000      |
| 437  | GOBP-REGULATION-OF-CELL-PROJECTION-ORGANIZATION   | 20   | 0.311545 | 0.977057 | 0.493438  | 0.726396  | 1.000      |
| 438  | GOBP-CENTRAL-NERVOUS-SYSTEM-DEVELOPMENT           | 26   | 0.298163 | 0.973574 | 0.508035  | 0.731471  | 1.000      |
| 439  | GOBP-PROTEIN-CATABOLIC-PROCESS                    | 8    | 0.400432 | 0.973231 | 0.510294  | 0.730471  | 1.000      |
| 440  | REACTOME-ESTROGEN-DEPENDENT-NUCLEAR-EVENTS-DOW... | 5    | 0.464124 | 0.970563 | 0.515432  | 0.733706  | 1.000      |
| 441  | REACTOME-L1CAM-INTERACTIONS                       | 5    | 0.459885 | 0.968841 | 0.520129  | 0.735343  | 1.000      |
| 442  | GOBP-REGULATION-OF-CELL-CELL-ADHESION             | 9    | 0.370863 | 0.965184 | 0.521739  | 0.740525  | 1.000      |
| 443  | GOBP-SPROUTING-ANGIOGENESIS                       | 5    | 0.445783 | 0.964818 | 0.526287  | 0.739547  | 1.000      |
| 444  | GOBP-REGULATION-OF-ION-TRANSPORT                  | 36   | 0.281308 | 0.962357 | 0.504717  | 0.741861  | 1.000      |
| 445  | HALLMARK-KRAS-SIGNALING-UP                        | 6    | 0.427254 | 0.962357 | 0.511144  | 0.740738  | 1.000      |
| 446  | GOBP-FORBRAIN-DEVELOPMENT                         | 9    | 0.368201 | 0.959535 | 0.523605  | 0.744157  | 1.000      |
| 447  | GOBP-RESPONSE-TO-HORMONE                          | 20   | 0.303155 | 0.958693 | 0.498094  | 0.744002  | 1.000      |
| 448  | REACTOME-ESR-MEDIATED-SIGNALING                   | 8    | 0.390477 | 0.952048 | 0.52941   | 0.754856  | 1.000      |
| 449  | GOBP-RESPONSE-TO-MOLECULE-OF-BACTERIAL-ORIGIN     | 13   | 0.341481 | 0.948940 | 0.533512  | 0.759038  | 1.000      |
| 450  | GOBP-REGULATION-OF-SYNAPTIC-PLASTICITY            | 21   | 0.301222 | 0.948194 | 0.530612  | 0.758826  | 1.000      |
| 451  | GOBP-REGULATION-OF-NEURON-PROJECTION-DEVELOPMENT  | 16   | 0.321198 | 0.947812 | 0.539267  | 0.757873  | 1.000      |
| 452  | GOBP-NEGATIVE-REGULATION-OF-CELL-POPULATION-PR... | 9    | 0.375509 | 0.946639 | 0.538889  | 0.758281  | 1.000      |
| 453  | GOBP-NEGATIVE-REGULATION-OF-TRANSMEMBRANE-TRAN... | 6    | 0.425084 | 0.945885 | 0.547511  | 0.757964  | 1.000      |
| 454  | GOBP-RESPONSE-TO-BACTERIUM                        | 13   | 0.341481 | 0.943250 | 0.522161  | 0.761138  | 1.000      |
| 455  | GOBP-TRANSMEMBRANE-TRANSPORT                      | 27   | 0.281659 | 0.939829 | 0.551151  | 0.766197  | 1.000      |
| 456  | REACTOME-PTEN-REGULATION                          | 5    | 0.438356 | 0.939664 | 0.543344  | 0.764852  | 1.000      |
| 457  | REACTOME-SIGNALING-BY-NUCLEAR-RECEPTORS           | 8    | 0.390477 | 0.939314 | 0.551429  | 0.763744  | 1.000      |
| 458  | GOBP-REGULATION-OF-NEURONAL-SYNAPTIC-PLASTICITY   | 7    | 0.397562 | 0.934431 | 0.579942  | 0.770800  | 1.000      |
| 459  | GOBP-REGULATION-OF-CELL-DEATH                     | 34   | 0.269086 | 0.934338 | 0.558458  | 0.769342  | 1.000      |
| 460  | GOBP-POSITIVE-REGULATION-OF-ENDOTHELIAL-CELL-P... | 6    | 0.415427 | 0.932238 | 0.566717  | 0.771359  | 1.000      |
| 461  | GOBP-POSITIVE-REGULATION-OF-CELLULAR-COMPONENT... | 9    | 0.358511 | 0.929561 | 0.546610  | 0.774723  | 1.000      |
| 462  | REACTOME-CA-DEPENDENT-EVENTS                      | 8    | 0.376383 | 0.927259 | 0.554412  | 0.777243  | 1.000      |
| 463  | GOBP-PROTEIN-MODIFICATION-BY-SMALL-PROTEIN-CON... | 7    | 0.382716 | 0.926243 | 0.548246  | 0.777492  | 1.000      |
| 464  | REACTOME-CLASS-C-3-METABOTROPIC-GLUTAMATE-PHER... | 7    | 0.391143 | 0.926022 | 0.575284  | 0.776209  | 1.000      |
| 465  | GOBP-SYNAPSE-ORGANIZATION                         | 17   | 0.304132 | 0.922526 | 0.578947  | 0.781022  | 1.000      |
| 466  | GOBP-CHEMICAL-HOMEOSTASIS                         | 23   | 0.287481 | 0.921428 | 0.563975  | 0.781299  | 1.000      |
| 467  | GOBP-PROTEIN-LOCALIZATION-TO-SYNAPSE              | 5    | 0.435596 | 0.921200 | 0.574400  | 0.780051  | 1.000      |
| 468  | GOBP-CELL-CELL-SIGNALING                          | 56   | 0.267935 | 0.917385 | 0.605882  | 0.785098  | 1.000      |
| 469  | GOBP-REGULATION-OF-ANATOMICAL-STRUCTURE-SIZE      | 10   | 0.351096 | 0.916205 | 0.583215  | 0.785377  | 1.000      |
| 470  | REACTOME-INFECTIOUS-DISEASE                       | 13   | 0.322038 | 0.911119 | 0.572238  | 0.792527  | 1.000      |

Continuation of Table S16

| NAME | ID                                                 | SIZE | ES       | NES      | NOM.p.val | FDR.q.val | FWER.p.val |
|------|----------------------------------------------------|------|----------|----------|-----------|-----------|------------|
| 471  | GOBP-ORGANONITROGEN_COMPOUND_CATABOLIC_PROCESS     | 9    | 0.352892 | 0.909317 | 0.589563  | 0.794082  | 1.000      |
| 472  | GOBP-ORGANIC_HYDROXY_COMPOUND_METABOLIC_PROCESS    | 7    | 0.378620 | 0.906487 | 0.587706  | 0.797436  | 1.000      |
| 473  | GOBP-RESPONSE_TO_NITROGEN_COMPOUND                 | 34   | 0.264833 | 0.906443 | 0.589461  | 0.795827  | 1.000      |
| 474  | GOBP-PROTEIN_LOCALIZATION_TO_POSTSYNAPSE           | 5    | 0.435596 | 0.903073 | 0.608696  | 0.800167  | 1.000      |
| 475  | GOBP-LEARNING                                      | 13   | 0.323243 | 0.902751 | 0.576407  | 0.799033  | 1.000      |
| 476  | GOBP-NEURON_MIGRATION                              | 5    | 0.426890 | 0.898373 | 0.625373  | 0.805023  | 1.000      |
| 477  | GOBP-POSTSYNAPSE_ORGANIZATION                      | 10   | 0.341655 | 0.896550 | 0.594142  | 0.806755  | 1.000      |
| 478  | GOBP-CELLULAR_RESPONSE_TO_HORMONE_STIMULUS         | 11   | 0.328024 | 0.895276 | 0.623580  | 0.807270  | 1.000      |
| 479  | GOBP-CELL_JUNCTION_ORGANIZATION                    | 19   | 0.285241 | 0.894956 | 0.600519  | 0.806116  | 1.000      |
| 480  | GOBP-SMALL_GTPASE-MEDIATED_SIGNAL_TRANSDUCTION     | 8    | 0.362990 | 0.892702 | 0.610719  | 0.808371  | 1.000      |
| 481  | GOBP-PROTEIN_LOCALIZATION_TO_CELL_PERIPHERY        | 12   | 0.325203 | 0.889001 | 0.603001  | 0.813071  | 1.000      |
| 482  | GOBP-ENDOMEMBRANE_SYSTEM_ORGANIZATION              | 6    | 0.386855 | 0.886390 | 0.630792  | 0.815749  | 1.000      |
| 483  | GOBP-NEGATIVE_REGULATION_OF_CELL_PROJECTION_OR...  | 5    | 0.423335 | 0.885512 | 0.632504  | 0.815587  | 1.000      |
| 484  | GOBP-REGULATION_OF_CYSSTEINE_TYPE_ENDOPEPTIDASE... | 9    | 0.341495 | 0.885374 | 0.619392  | 0.814149  | 1.000      |
| 485  | GOBP-POSITIVE_REGULATION_OF_BINDING                | 6    | 0.396872 | 0.881922 | 0.632308  | 0.818334  | 1.000      |
| 486  | REACTOME-GPCR_LIGAND_BINDING                       | 8    | 0.356439 | 0.881907 | 0.615385  | 0.816674  | 1.000      |
| 487  | GOBP-RESPONSE_TO_ACID_CHEMICAL                     | 6    | 0.397203 | 0.881807 | 0.626973  | 0.815166  | 1.000      |
| 488  | GOBP-POSITIVE_REGULATION_OF_AXONOGENESIS           | 5    | 0.420261 | 0.880661 | 0.658462  | 0.815480  | 1.000      |
| 489  | GOBP-SKELETAL_MUSCLE_ORGAN_DEVELOPMENT             | 5    | 0.409639 | 0.879974 | 0.625564  | 0.815026  | 1.000      |
| 490  | REACTOME-G_PROTEIN-MEDIATED_EVENTS                 | 9    | 0.346721 | 0.879284 | 0.627424  | 0.814445  | 1.000      |
| 491  | GOBP-CELLULAR_RESPONSE_TO_CADMIUM_ION              | 5    | 0.416524 | 0.876469 | 0.640000  | 0.817565  | 1.000      |
| 492  | GOBP-GLAND_DEVELOPMENT                             | 7    | 0.370188 | 0.876077 | 0.654572  | 0.816530  | 1.000      |
| 493  | GOBP-REGULATION_OF_CELLULAR_LOCALIZATION           | 17   | 0.294597 | 0.874694 | 0.649551  | 0.817175  | 1.000      |
| 494  | GOBP-T-CELL_ACTIVATION                             | 8    | 0.361342 | 0.874094 | 0.625869  | 0.816503  | 1.000      |
| 495  | REACTOME-DEVELOPMENTAL_BIOLOGY                     | 23   | 0.270858 | 0.870693 | 0.650773  | 0.820653  | 1.000      |
| 496  | GOBP-CELLULAR_COMPONENT_MAINTENANCE                | 5    | 0.416096 | 0.869140 | 0.650078  | 0.821553  | 1.000      |
| 497  | REACTOME-EPH_EPHRIN_SIGNALING                      | 6    | 0.381367 | 0.866242 | 0.660633  | 0.824697  | 1.000      |
| 498  | GOBP-HOMEOSTASIS_OF_NUMBER_OF_CELLS                | 5    | 0.408684 | 0.862973 | 0.630468  | 0.828557  | 1.000      |
| 499  | GOBP-RESPONSE_TO_CADMIUM_ION                       | 6    | 0.382837 | 0.861826 | 0.665726  | 0.828908  | 1.000      |
| 500  | GOBP-PROTEIN_LOCALIZATION_TO_CELL_JUNCTION         | 6    | 0.386283 | 0.861748 | 0.647416  | 0.827358  | 1.000      |
| 501  | REACTOME-EXTRACELLULAR_MATRIX_ORGANIZATION         | 5    | 0.402740 | 0.859492 | 0.673252  | 0.829330  | 1.000      |
| 502  | GOBP-G_PROTEIN_COUPLED_GLUTAMATE_RECEPTOR_SIGN...  | 8    | 0.348932 | 0.856184 | 0.655882  | 0.833119  | 1.000      |
| 503  | GOBP-PROTEIN_MODIFICATION_BY_SMALL_PROTEIN_CON...  | 6    | 0.378049 | 0.851239 | 0.665685  | 0.839549  | 1.000      |
| 504  | GOBP-CELLULAR_RESPONSE_TO_PEPITIDE_HORMONE_STIM... | 9    | 0.328738 | 0.850864 | 0.666207  | 0.838610  | 1.000      |
| 505  | GOBP-TELENCEPHALON_DEVELOPMENT                     | 6    | 0.377617 | 0.848078 | 0.676602  | 0.841544  | 1.000      |
| 506  | GOBP-EMBRYONIC_ORGAN_DEVELOPMENT                   | 7    | 0.364950 | 0.846729 | 0.688478  | 0.842041  | 1.000      |
| 507  | GOBP-REGULATION_OF_CELLULAR_COMPONENT_SIZE         | 7    | 0.354772 | 0.845475 | 0.672439  | 0.842496  | 1.000      |
| 508  | REACTOME-LEISHMANIA_INFECTION                      | 10   | 0.316437 | 0.844331 | 0.652463  | 0.842573  | 1.000      |
| 509  | GOBP-REGULATION_OF_PROTEIN_TYROSINE_KINASE_ACT...  | 5    | 0.399069 | 0.841215 | 0.693098  | 0.845928  | 1.000      |
| 510  | GOBP-RESPONSE_TO_CALCMIUM_ION                      | 6    | 0.376664 | 0.840017 | 0.685714  | 0.846329  | 1.000      |
| 511  | GOBP-POSITIVE_REGULATION_OF_MYELOID_CELL_DIFFE...  | 7    | 0.352811 | 0.838458 | 0.693908  | 0.847360  | 1.000      |
| 512  | GOBP-RESPONSE_TO_INSULIN                           | 5    | 0.397599 | 0.835759 | 0.712782  | 0.850035  | 1.000      |
| 513  | GOBP-POSITIVE_REGULATION_OF_PROTEIN_TYROSINE_K...  | 5    | 0.399069 | 0.833736 | 0.718110  | 0.851572  | 1.000      |

Continuation of Table S16

| NAME                                                  | ID            | SIZE | ES       | NES      | NOM.p.val | FDR.q.val | FWER.p.val |
|-------------------------------------------------------|---------------|------|----------|----------|-----------|-----------|------------|
| 514 GOBP-PURINE-CONTAINING-COMPOUND-METABOLIC-PROCESS | GO-0072521    | 5    | 0.392307 | 0.832345 | 0.722741  | 0.852079  | 1.000      |
| 515 GOBP-POSITIVE-REGULATION-OF-SECRETION             | GO-0051047    | 6    | 0.372137 | 0.830466 | 0.696319  | 0.853451  | 1.000      |
| 516 GOBP-MYELOID-LEUKOCYTE-DIFFERENTIATION            | GO-0002573    | 11   | 0.304565 | 0.829793 | 0.687943  | 0.852964  | 1.000      |
| 517 GOBP-INTRINSIC-APOPTOTIC-SIGNALING-PATHWAY        | GO-0097193    | 5    | 0.387377 | 0.829400 | 0.694228  | 0.851870  | 1.000      |
| 518 GOBP-CELL-PROJECTION-ORGANIZATION                 | GO-0030030    | 34   | 0.238263 | 0.828379 | 0.708892  | 0.851821  | 1.000      |
| 519 GOBP-RECEPTOR-MEDIATED-ENDOCYTOSIS                | GO-0006898    | 6    | 0.365151 | 0.828134 | 0.713056  | 0.850616  | 1.000      |
| 520 GOBP-CELL-MORPHOGENESIS-INVOLVED-IN-NEURON-DIF... | GO-0048667    | 21   | 0.258517 | 0.827948 | 0.716837  | 0.849258  | 1.000      |
| 521 GOBP-RESPONSE-TO-PEPTIDE-HORMONE                  | GO-0043434    | 13   | 0.293289 | 0.825155 | 0.712912  | 0.852002  | 1.000      |
| 522 GOBP-CELL-MORPHOGENESIS-INVOLVED-IN-DIFFERENTI... | GO-0000904    | 21   | 0.258517 | 0.824600 | 0.692695  | 0.851306  | 1.000      |
| 523 HALLMARK-APOPTOSIS                                | M5902         | 6    | 0.361849 | 0.817405 | 0.694084  | 0.860792  | 1.000      |
| 524 GOBP-POSITIVE-REGULATION-OF-CYSTEINE-TYPE-ENDO... | GO-2001056    | 7    | 0.344234 | 0.816348 | 0.715152  | 0.860803  | 1.000      |
| 525 GOBP-POSITIVE-REGULATION-OF-NEURON-DEATH          | GO-1901216    | 5    | 0.389248 | 0.815837 | 0.718894  | 0.859933  | 1.000      |
| 526 GOBP-PEPTIDYL-SERINE-MODIFICATION                 | GO-0018209    | 12   | 0.293566 | 0.814723 | 0.707483  | 0.859935  | 1.000      |
| 527 GOBP-POSITIVE-REGULATION-OF-PEPTIDASE-ACTIVITY    | GO-0010952    | 7    | 0.344234 | 0.814641 | 0.705185  | 0.858420  | 1.000      |
| 528 GOBP-APOPTOTIC-MITOCHONDRIAL-CHANGES              | GO-0008637    | 6    | 0.361234 | 0.814500 | 0.714495  | 0.857025  | 1.000      |
| 529 GOBP-MULTICELLULAR-ORGANISMAL-RESPONSE-TO-STRESS  | GO-0033555    | 5    | 0.380015 | 0.813928 | 0.746154  | 0.856258  | 1.000      |
| 530 GOBP-REGULATION-OF-HYDROLASE-ACTIVITY             | GO-0051336    | 22   | 0.254768 | 0.811522 | 0.713342  | 0.858315  | 1.000      |
| 531 REACTOME-CELLULAR-SENESCENCE                      | R-RNO-2559583 | 6    | 0.358464 | 0.810048 | 0.743161  | 0.858980  | 1.000      |
| 532 GOBP-SYNAPTIC-SIGNALING                           | GO-0099536    | 47   | 0.227103 | 0.808653 | 0.742690  | 0.859521  | 1.000      |
| 533 REACTOME-SENESCENCE-ASSOCIATED-SECRETORY-PHENO... | R-RNO-2559582 | 6    | 0.358464 | 0.807668 | 0.704918  | 0.859329  | 1.000      |
| 534 GOBP-POSITIVE-REGULATION-OF-SYNAPTIC-TRANSMISSION | GO-0050806    | 15   | 0.278566 | 0.805956 | 0.732713  | 0.860339  | 1.000      |
| 535 GOBP-COGNITION                                    | GO-0050890    | 28   | 0.239326 | 0.804769 | 0.720497  | 0.860569  | 1.000      |
| 536 GOBP-NEGATIVE-REGULATION-OF-IMMUNE-SYSTEM-PROCESS | GO-0002683    | 5    | 0.373534 | 0.804194 | 0.739968  | 0.859799  | 1.000      |
| 537 GOBP-REGULATION-OF-LYMPHOCYTE-ACTIVATION          | GO-0051249    | 5    | 0.386456 | 0.802546 | 0.753776  | 0.860670  | 1.000      |
| 538 GOBP-RESPONSE-TO-ENDOGENOUS-STIMULUS              | GO-0009719    | 34   | 0.23127  | 0.800723 | 0.734055  | 0.861736  | 1.000      |
| 539 GOBP-RESPONSE-TO-OXYGEN-LEVELS                    | GO-0070482    | 8    | 0.320802 | 0.800698 | 0.733612  | 0.860177  | 1.000      |
| 540 GOBP-MUSCLE-CONTRACTION                           | GO-0006936    | 5    | 0.378086 | 0.794110 | 0.757079  | 0.868107  | 1.000      |
| 541 GOBP-CHEMICAL-SYNAPTIC-TRANSMISSION-POSTSYNAPTIC  | GO-0099565    | 9    | 0.308284 | 0.793965 | 0.733894  | 0.866716  | 1.000      |
| 542 GOBP-POSITIVE-REGULATION-OF-DEFENSE-RESPONSE      | GO-0031349    | 5    | 0.374790 | 0.792777 | 0.753870  | 0.866856  | 1.000      |
| 543 GOBP-RECEPTOR-INTERNALIZATION                     | GO-0031623    | 5    | 0.368751 | 0.785952 | 0.783489  | 0.874925  | 1.000      |
| 544 GOBP-RECEPTOR-METABOLIC-PROCESS                   | GO-0043112    | 5    | 0.368751 | 0.779191 | 0.792109  | 0.883164  | 1.000      |
| 545 GOBP-REGULATION-OF-CELLULAR-COMPONENT-BIOGENESIS  | GO-0044087    | 10   | 0.294901 | 0.778720 | 0.742075  | 0.882233  | 1.000      |
| 546 GOBP-POSITIVE-REGULATION-OF-TRANSMEMBRANE-TRAN... | GO-0034764    | 7    | 0.331291 | 0.776100 | 0.764368  | 0.884304  | 1.000      |
| 547 REACTOME-INTEGRATION-OF-ENERGY-METABOLISM         | R-RNO-163685  | 5    | 0.355879 | 0.775341 | 0.782071  | 0.883763  | 1.000      |
| 548 GOBP-REGULATION-OF-PROTEIN-BINDING                | GO-0043393    | 7    | 0.328518 | 0.772513 | 0.752907  | 0.885987  | 1.000      |
| 549 GOBP-REGULATION-OF-TRANS-SYNAPTIC-SIGNALING       | GO-0099177    | 40   | 0.223399 | 0.765029 | 0.798788  | 0.894640  | 1.000      |
| 550 GOBP-RESPONSE-TO-GROWTH-FACTOR                    | GO-0070848    | 18   | 0.250419 | 0.764327 | 0.782956  | 0.893940  | 1.000      |
| 551 GOBP-REGULATION-OF-PROTEIN-CATABOLIC-PROCESS      | GO-0042176    | 7    | 0.320324 | 0.759465 | 0.765832  | 0.898977  | 1.000      |
| 552 GOBP-HEAD-DEVELOPMENT                             | GO-0060322    | 22   | 0.236883 | 0.751412 | 0.816195  | 0.908441  | 1.000      |
| 553 GOBP-LONG-TERM-SYNAPTIC-DEPRESSION                | GO-0060292    | 5    | 0.352008 | 0.748006 | 0.819165  | 0.911247  | 1.000      |
| 554 GOBP-CELLULAR-ION-HOMEOSTASIS                     | GO-0008873    | 14   | 0.263148 | 0.746604 | 0.794078  | 0.911592  | 1.000      |
| 555 GOBP-MITOCHONDRION-ORGANIZATION                   | GO-0007005    | 7    | 0.310399 | 0.742492 | 0.806967  | 0.915269  | 1.000      |
| 556 GOBP-NEURON-DEVELOPMENT                           | GO-0048666    | 33   | 0.209590 | 0.735766 | 0.809002  | 0.922335  | 1.000      |

Continuation of Table S16

| NAME                                                  | ID            | SIZE | ES       | NES      | NOM.p.val | FDR.q.val | FWER.p.val |
|-------------------------------------------------------|---------------|------|----------|----------|-----------|-----------|------------|
| 557 GOBP-NEURON-DIFFERENTIATION                       | GO-0030182    | 36   | 0.213715 | 0.726414 | 0.828916  | 0.932489  | 1.000      |
| 558 GOBP-COAGULATION                                  | GO-0050817    | 8    | 0.297789 | 0.725442 | 0.826761  | 0.932029  | 1.000      |
| 559 GOBP-EPITHELIAL-CELL-DIFFERENTIATION              | GO-0030855    | 7    | 0.311233 | 0.725118 | 0.821429  | 0.930727  | 1.000      |
| 560 GOBP-REGULATION-OF-POSTSYNAPSE-ORGANIZATION       | GO-0099175    | 6    | 0.326741 | 0.723270 | 0.824806  | 0.931485  | 1.000      |
| 561 GOBP-POSITIVE-REGULATION-OF-PROTEOLYSIS           | GO-0045862    | 8    | 0.291015 | 0.722199 | 0.820550  | 0.931140  | 1.000      |
| 562 GOBP-REGULATION-OF-GTPASE-ACTIVITY                | GO-0043087    | 5    | 0.342363 | 0.718798 | 0.855118  | 0.933698  | 1.000      |
| 563 GOBP-RESPONSE-TO-NUTRIENT                         | GO-0007584    | 5    | 0.335713 | 0.713776 | 0.852146  | 0.938057  | 1.000      |
| 564 GOBP-NEUROGENESIS                                 | GO-0022008    | 40   | 0.201882 | 0.713425 | 0.837545  | 0.936812  | 1.000      |
| 565 REACTOME-TRANSCRIPTIONAL-REGULATION-BY-TP53       | R-RNO-3700989 | 6    | 0.321822 | 0.713096 | 0.847458  | 0.935600  | 1.000      |
| 566 GOBP-POSITIVE-REGULATION-OF-MYELOID-LEUKOCYTE---- | GO-0002763    | 6    | 0.314213 | 0.708836 | 0.858824  | 0.939093  | 1.000      |
| 567 GOBP-ORGANIC-HYDROXY-COMPOUND-TRANSPORT           | GO-0015850    | 6    | 0.315467 | 0.707041 | 0.826023  | 0.939513  | 1.000      |
| 568 GOBP-NEGATIVE-REGULATION-OF-CATABOLIC-PROCESS     | GO-0009895    | 6    | 0.281105 | 0.703266 | 0.834734  | 0.942368  | 1.000      |
| 569 HALLMARK-HYPOXIA                                  | M5891         | 5    | 0.332456 | 0.702769 | 0.839637  | 0.941340  | 1.000      |
| 570 REACTOME-TRANSCRIPTIONAL-REGULATION-OF-WHITE-A--- | R-RNO-381340  | 6    | 0.313055 | 0.702469 | 0.846847  | 0.940026  | 1.000      |
| 571 GOBP-REGULATION-OF-CELL-ACTIVATION                | GO-0050865    | 8    | 0.278881 | 0.692941 | 0.861386  | 0.949342  | 1.000      |
| 572 GOBP-NERVOUS-SYSTEM-PROCESS                       | GO-0050877    | 38   | 0.201346 | 0.690816 | 0.854897  | 0.949999  | 1.000      |
| 573 GOBP-MEMBRANE-ORGANIZATION                        | GO-0061024    | 12   | 0.247880 | 0.682772 | 0.862797  | 0.957545  | 1.000      |
| 574 GOBP-RESPONSE-TO-OXIDATIVE-STRESS                 | GO-0006979    | 8    | 0.274812 | 0.682431 | 0.865248  | 0.956217  | 1.000      |
| 575 GOBP-RESPONSE-TO-REACTIVE-OXYGEN-SPECIES          | GO-0000302    | 8    | 0.274812 | 0.680847 | 0.856330  | 0.956232  | 1.000      |
| 576 GOBP-NEGATIVE-REGULATION-OF-SYNAPTIC-TRANSMISSION | GO-0050805    | 5    | 0.302797 | 0.677124 | 0.895833  | 0.958410  | 1.000      |
| 577 GOBP-RESPONSE-TO-MONOSACCHARIDE                   | GO-0034284    | 6    | 0.319893 | 0.677009 | 0.874433  | 0.956879  | 1.000      |
| 578 GOBP-POSITIVE-REGULATION-OF-HYDROLASE-ACTIVITY    | GO-0051345    | 16   | 0.227822 | 0.676636 | 0.878113  | 0.955644  | 1.000      |
| 579 GOBP-REGULATION-OF-AXOGENESIS                     | GO-0050770    | 7    | 0.288068 | 0.676066 | 0.868644  | 0.954620  | 1.000      |
| 580 GOBP-G-PROTEIN-COUPLED-RECEPTOR-SIGNALING-PATHWAY | GO-0007186    | 18   | 0.223313 | 0.676056 | 0.878828  | 0.952994  | 1.000      |
| 581 GOBP-RESPONSE-TO-CARBOHYDRATE                     | GO-1903131    | 7    | 0.291129 | 0.674017 | 0.887240  | 0.953485  | 1.000      |
| 582 GOBP-RESPONSE-TO-CARBOHYDRATE                     | GO-0009743    | 5    | 0.319893 | 0.671858 | 0.909375  | 0.954195  | 1.000      |
| 583 GOBP-ION-HOMEOSTASIS                              | GO-0050801    | 16   | 0.226014 | 0.667336 | 0.878378  | 0.957281  | 1.000      |
| 584 GOBP-CELL-PART-MORPHOGENESIS                      | GO-0032990    | 24   | 0.204069 | 0.664174 | 0.905897  | 0.958852  | 1.000      |
| 585 GOBP-CELLULAR-COMPONENT-MORPHOGENESIS             | GO-0032989    | 24   | 0.204069 | 0.663606 | 0.894147  | 0.957788  | 1.000      |
| 586 GOBP-CELL-MORPHOGENESIS                           | GO-0000902    | 24   | 0.204069 | 0.659993 | 0.902378  | 0.959807  | 1.000      |
| 587 GOBP-MULTICELLULAR-ORGANISMAL-HOMEOSTASIS         | GO-0048871    | 12   | 0.240227 | 0.659317 | 0.887671  | 0.958837  | 1.000      |
| 588 GOBP-REGULATION-OF-SYNAPSE-STRUCTURE-OR-ACTIVITY  | GO-0050803    | 11   | 0.248887 | 0.657875 | 0.894366  | 0.958703  | 1.000      |
| 589 GOBP-CELL-JUNCTION-ASSEMBLY                       | GO-0034329    | 8    | 0.266507 | 0.653921 | 0.901288  | 0.960963  | 1.000      |
| 590 GOBP-POSITIVE-REGULATION-OF-HEMOPOIESIS           | GO-1903708    | 7    | 0.275255 | 0.652232 | 0.904192  | 0.960964  | 1.000      |
| 591 GOBP-REGULATION-OF-PHOSPHOLIPASE-ACTIVITY         | GO-0010517    | 6    | 0.284849 | 0.640894 | 0.917647  | 0.969926  | 1.000      |
| 592 GOBP-CHROMATIN-ORGANIZATION                       | GO-0006325    | 5    | 0.299886 | 0.638827 | 0.929003  | 0.970120  | 1.000      |
| 593 GOBP-TEMPERATURE-HOMEOSTASIS                      | GO-0001659    | 5    | 0.303063 | 0.638534 | 0.918836  | 0.968740  | 1.000      |
| 594 GOBP-REGULATION-OF-BODY-FLUID-LEVELS              | GO-0050878    | 11   | 0.231723 | 0.637373 | 0.888738  | 0.968126  | 1.000      |
| 595 GOBP-REGULATION-OF-LIPASE-ACTIVITY                | GO-0060191    | 6    | 0.284849 | 0.635814 | 0.910470  | 0.967887  | 1.000      |
| 596 GOBP-DEFENSE-RESPONSE                             | GO-0006952    | 19   | 0.198859 | 0.628519 | 0.922380  | 0.972454  | 1.000      |
| 597 GOBP-TAXIS                                        | GO-0042330    | 14   | 0.217005 | 0.620908 | 0.910714  | 0.977097  | 1.000      |
| 598 GOBP-REGULATION-OF-MYELOID-CELL-DIFFERENTIATION   | GO-0045637    | 9    | 0.241323 | 0.620662 | 0.907143  | 0.975657  | 1.000      |
| 599 GOBP-LONG-TERM-SYNAPTIC-POTENTIATION              | GO-0060291    | 12   | 0.220013 | 0.619716 | 0.923611  | 0.974821  | 1.000      |

Continuation of Table S16

| NAME                                                   | ID            | SIZE | ES        | NES       | NOM.p.val | FDR.q.val | FWER.p.val |
|--------------------------------------------------------|---------------|------|-----------|-----------|-----------|-----------|------------|
| 600 REACTOME_NEUREXINS_AND_NEUROLIGINS                 | R-RNO-6794361 | 9    | 0.242981  | 0.616868  | 0.926491  | 0.975482  | 1.000      |
| 601 GOBP_IMPORT_INTO_CELL                              | GO-0098657    | 6    | 0.270001  | 0.614051  | 0.916176  | 0.976052  | 1.000      |
| 602 GOBP_PROTEIN_LOCALIZATION_TO_PLASMA_MEMBRANE       | GO-0072659    | 7    | 0.264032  | 0.612996  | 0.918759  | 0.975287  | 1.000      |
| 603 GOBP_BEHAVIOR                                      | GO-0007610    | 32   | 0.180228  | 0.609970  | 0.945679  | 0.975952  | 1.000      |
| 604 GOBP_REGULATION_OF_MYELOID_LEUKOCYTE_DIFFERENT...  | GO-0002761    | 8    | 0.242378  | 0.604517  | 0.917012  | 0.978470  | 1.000      |
| 605 GOBP_RESPONSE_TO_BIOTIC_STIMULUS                   | GO-0009607    | 17   | 0.197730  | 0.603226  | 0.946738  | 0.977794  | 1.000      |
| 606 REACTOME_LONG_TERM_POTENTIATION                    | R-HSA-9620244 | 10   | 0.225161  | 0.594295  | 0.945302  | 0.982453  | 1.000      |
| 607 GOBP_ASSOCIATIVE_LEARNING                          | GO-0008306    | 7    | 0.255620  | 0.592860  | 0.935484  | 0.981834  | 1.000      |
| 608 GOBP_METAL_ION_TRANSPORT                           | GO-0030001    | 11   | 0.215412  | 0.587824  | 0.935441  | 0.983504  | 1.000      |
| 609 GOBP_LIPID_EXPORT_FROM_CELL                        | GO-0140353    | 5    | 0.275638  | 0.584391  | 0.945312  | 0.984160  | 1.000      |
| 610 HALLMARK_EPITHELIAL_MESENCHYMAL_TRANSITION         | M5930         | 5    | 0.268031  | 0.583003  | 0.952160  | 0.983478  | 1.000      |
| 611 GOBP_CALCIIUM_ION_TRANSPORT                        | GO-0006816    | 11   | 0.215412  | 0.577884  | 0.941909  | 0.985009  | 1.000      |
| 612 REACTOME_RNA_POLYMERASE_II_TRANSCRIPTION           | R-RNO-73857   | 20   | 0.176889  | 0.561027  | 0.953905  | 0.992801  | 1.000      |
| 613 GOBP_CELLULAR_RESPONSE_TO_KETONE                   | GO-1901655    | 5    | 0.259139  | 0.550715  | 0.975904  | 0.996523  | 1.000      |
| 614 GOBP_RESPONSE_TO_MECHANICAL_STIMULUS               | GO-0009612    | 6    | 0.243902  | 0.550654  | 0.973479  | 0.994921  | 1.000      |
| 615 REACTOME_POST_TRANSLATIONAL_PROTEIN_MODIFICATION   | R-RNO-597592  | 7    | 0.234188  | 0.550396  | 0.969914  | 0.993431  | 1.000      |
| 616 GOBP_PEPITIDYL_LYSINE_MODIFICATION                 | GO-0018205    | 5    | 0.256173  | 0.549842  | 0.981482  | 0.992080  | 1.000      |
| 617 GOBP_REGULATION_OF_LEUKOCYTE_DIFFERENTIATION       | GO-1902105    | 9    | 0.212615  | 0.540235  | 0.969609  | 0.994837  | 1.000      |
| 618 GOBP_CIRCULATORY_SYSTEM_PROCESS                    | GO-0003013    | 5    | 0.254032  | 0.539799  | 0.980798  | 0.993428  | 1.000      |
| 619 GOBP_METAL_ION_HOMEOSTASIS                         | GO-0005065    | 14   | 0.183963  | 0.535566  | 0.971698  | 0.993513  | 1.000      |
| 620 GOBP_AMINO_ACID_TRANSPORT                          | GO-0006865    | 6    | 0.237175  | 0.534135  | 0.981846  | 0.992465  | 1.000      |
| 621 GOBP_REGULATION_OF_HEMOPOIESIS                     | GO-1903706    | 10   | 0.201782  | 0.534026  | 0.967742  | 0.990893  | 1.000      |
| 622 GOBP_CARBOXYLIC_ACID_TRANSPORT                     | GO-0046942    | 6    | 0.237175  | 0.533323  | 0.971976  | 0.989580  | 1.000      |
| 623 GOBP_REGULATION_OF_CYTOSOLIC_CALCIIUM_ION_CONCE... | GO-0051480    | 13   | 0.186371  | 0.532482  | 0.970549  | 0.988294  | 1.000      |
| 624 GOBP_ORGANIC_ANION_TRANSPORT                       | GO-0015711    | 6    | 0.237175  | 0.532296  | 0.980031  | 0.986794  | 1.000      |
| 625 GOBP_DIVALENT_INORGANIC_CATION_HOMEOSTASIS         | GO-0072507    | 13   | 0.163751  | 0.522581  | 0.972490  | 0.988855  | 1.000      |
| 626 GOBP_CELLULAR_RESPONSE_TO_ALCOHOL                  | GO-0097306    | 5    | 0.246986  | 0.511750  | 0.987988  | 0.990736  | 1.000      |
| 627 HALLMARK_TNFA_SIGNALING_VIA_NFKB                   | M5890         | 14   | 0.164738  | 0.473874  | 0.989390  | 0.997981  | 1.000      |
| 628 GOBP_POSITIVE_REGULATION_OF_NEURON_PROJECTION...   | GO-0010976    | 5    | 0.213312  | 0.450531  | 0.998466  | 0.999848  | 1.000      |
| 629 GOBP_ORGANIC_ACID_TRANSPORT                        | GO-0015849    | 7    | 0.175111  | 0.420216  | 1.000000  | 1.000000  | 1.000      |
| 630 GOBP_POSITIVE_REGULATION_OF_PEPITIDYL_SERINE_PH... | GO-0033138    | 8    | 0.160609  | 0.413800  | 0.995726  | 0.999859  | 1.000      |
| 631 GOBP_REGULATION_OF_PEPITIDYL_SERINE_PHOSPHORYLA... | GO-0033135    | 8    | 0.160609  | 0.407824  | 1.000000  | 0.998574  | 1.000      |
| 632 GOBP_MONOAMINE_TRANSPORT                           | GO-0015844    | 5    | -0.234939 | -0.539969 | 0.983389  | 0.986805  | 1.000      |
| 633 GOBP_OSTEOCLAST_DIFFERENTIATION                    | GO-0030316    | 6    | -0.215261 | -0.551849 | 0.976676  | 0.994314  | 1.000      |
| 634 GOBP_RESPONSE_TO_KETONE                            | GO-1901654    | 7    | -0.209877 | -0.557894 | 0.980892  | 1.000000  | 1.000      |
| 635 GOBP_RESPONSE_TO_INTERLEUKIN_1                     | GO-0070555    | 5    | -0.241161 | -0.568188 | 0.985549  | 1.000000  | 1.000      |
| 636 GOBP_NEURON_DEATH                                  | GO-0070997    | 18   | -0.151896 | -0.580561 | 0.958678  | 1.000000  | 1.000      |
| 637 GOBP_REGULATION_OF_CELL_SIZE                       | GO-0008361    | 5    | -0.253012 | -0.605023 | 0.964770  | 1.000000  | 1.000      |
| 638 GOBP_INORGANIC_ION_TRANSMEMBRANE_TRANSPORT         | GO-0098660    | 9    | -0.214062 | -0.641498 | 0.927336  | 1.000000  | 1.000      |
| 639 GOBP_REGULATION_OF_OSTEOCLAST_DIFFERENTIATION      | GO-0045670    | 5    | -0.271720 | -0.644746 | 0.929179  | 1.000000  | 1.000      |
| 640 GOBP_REGIONALIZATION                               | GO-0003002    | 6    | -0.256098 | -0.661413 | 0.928144  | 1.000000  | 1.000      |
| 641 GOBP_PATTERN_SPECIFICATION_PROCESS                 | GO-0007389    | 6    | -0.256098 | -0.664408 | 0.915584  | 1.000000  | 1.000      |
| 642 GOBP_AXON_DEVELOPMENT                              | GO-0061564    | 18   | -0.168375 | -0.665138 | 0.944186  | 1.000000  | 1.000      |



Continuation of Table S16

|     | NAME                                              | ID            | SIZE | ES        | NES       | NOM.p.val | FDR.q.val | PWER.p.val |
|-----|---------------------------------------------------|---------------|------|-----------|-----------|-----------|-----------|------------|
| 643 | GOBP.INNATE.IMMUNE.RESPONSE                       | GO-0045087    | 7    | -0.246914 | -0.669381 | 0.867069  | 1.000000  | 1.000      |
| 644 | GOBP.NEUTROPHIN.SIGNALING.PATHWAY                 | GO-0038179    | 6    | -0.268293 | -0.685256 | 0.880126  | 1.000000  | 1.000      |
| 645 | GOBP.NEUTROPHIN_TTK.RECEPTOR.SIGNALING.PATHWAY    | GO-0048011    | 6    | -0.268293 | -0.694379 | 0.877976  | 1.000000  | 1.000      |
| 646 | GOBP.LONG.TERM.MEMORY                             | GO-0007616    | 6    | -0.256098 | -0.694480 | 0.891374  | 1.000000  | 1.000      |
| 647 | REACTOME.ASSEMBLY.AND.CELL.SURFACE.PRESENTATIO... | R-RNO-9609736 | 8    | -0.249903 | -0.714602 | 0.852941  | 1.000000  | 1.000      |
| 648 | REACTOME.NEGATIVE.REGULATION.OF.NMDA.RECEPTOR...  | R-HSA-9617324 | 8    | -0.243903 | -0.732055 | 0.843949  | 1.000000  | 1.000      |
| 649 | GOBP.RESPONSE.TO.ALCOHOL                          | GO-0097305    | 11   | -0.221654 | -0.742545 | 0.812950  | 1.000000  | 1.000      |
| 650 | GOBP.DEFENSE.RESPONSE.TO.OTHER.ORGANISM           | GO-0098542    | 9    | -0.244763 | -0.763849 | 0.775578  | 0.994076  | 1.000      |
| 651 | GOBP.REGULATION.OF.PHOSPHOLIPASE.C.ACTIVITY       | GO-1900274    | 5    | -0.325301 | -0.765502 | 0.789174  | 1.000000  | 1.000      |
| 652 | GOBP.POSITIVE.REGULATION.OF.LIPASE.ACTIVITY       | GO-0060193    | 5    | -0.325301 | -0.772834 | 0.753086  | 1.000000  | 1.000      |
| 653 | GOBP.REGULATION.OF.MEMBRANE.POTENTIAL             | GO-0042391    | 17   | -0.205273 | -0.774434 | 0.793860  | 1.000000  | 1.000      |
| 654 | GOBP.CALCIUM.ION.TRANSMEMBRANE.TRANSPORT          | GO-0070588    | 7    | -0.283951 | -0.777547 | 0.744548  | 1.000000  | 1.000      |
| 655 | GOBP.CYTOSOLIC.CALCIUM.ION.TRANSPORT              | GO-0060401    | 7    | -0.283951 | -0.779044 | 0.738853  | 1.000000  | 1.000      |
| 656 | GOBP.NEURON.PROJECTION.GUIDANCE                   | GO-0097485    | 9    | -0.261453 | -0.785441 | 0.746875  | 1.000000  | 1.000      |
| 657 | GOBP.CALCIUM.ION.TRANSPORT.INTO.CYTOSOL           | GO-0060402    | 7    | -0.283951 | -0.788305 | 0.765060  | 1.000000  | 1.000      |
| 658 | GOBP.EPHRIN.RECEPTOR.SIGNALING.PATHWAY            | GO-0048013    | 5    | -0.337349 | -0.795211 | 0.719888  | 1.000000  | 1.000      |
| 659 | REACTOME.ANTI.INFLAMMATORY.RESPONSE.FAVOURING...  | R-HSA-9662851 | 5    | -0.349398 | -0.811318 | 0.699717  | 1.000000  | 1.000      |
| 660 | GOBP.ADENYLATE.CYCLASE.MODULATING.G.PROTEIN.CO... | GO-0007188    | 11   | -0.253295 | -0.835694 | 0.668990  | 1.000000  | 1.000      |
| 661 | REACTOME.SIGNALING.BY.NTRK2.TRK2                  | R-RNO-9006115 | 6    | -0.329268 | -0.837158 | 0.658147  | 1.000000  | 1.000      |
| 662 | GOBP.POSITIVE.REGULATION.OF.CATION.TRANSMEMBRA... | GO-1904064    | 5    | -0.349398 | -0.847774 | 0.675439  | 1.000000  | 1.000      |
| 663 | GOBP.CATION.TRANSPORT                             | GO-0006812    | 25   | -0.200800 | -0.854463 | 0.697561  | 1.000000  | 1.000      |
| 664 | GOBP.EXCITATORY.CHEMICAL.SYNAPTIC.TRANSMISSION    | GO-0098976    | 5    | -0.368844 | -0.866533 | 0.63846   | 0.996438  | 1.000      |
| 665 | GOBP.FATTY.ACID.TRANSPORT                         | GO-0015908    | 6    | -0.329268 | -0.870402 | 0.591429  | 1.000000  | 1.000      |
| 666 | GOBP.RESPONSE.TO.ETHANOL                          | GO-0045471    | 5    | -0.367185 | -0.874586 | 0.601173  | 1.000000  | 1.000      |
| 667 | GOBP.RESPONSE.TO.DRUG                             | GO-0042493    | 11   | -0.268354 | -0.883165 | 0.641221  | 1.000000  | 1.000      |
| 668 | GOBP.SENSORY.PERCEPTION.OF.PAIN                   | GO-0019233    | 5    | -0.367579 | -0.887802 | 0.531609  | 1.000000  | 1.000      |
| 669 | GOBP.RESPONSE.TO.NERVE.GROWTH.FACTOR              | GO-1990089    | 7    | -0.333333 | -0.889620 | 0.557276  | 1.000000  | 1.000      |
| 670 | GOBP.ADENYLATE.CYCLASE.INHIBITING.G.PROTEIN.CO... | GO-0007193    | 9    | -0.297020 | -0.890131 | 0.593333  | 1.000000  | 1.000      |
| 671 | REACTOME.INTERFERON.SIGNALING                     | R-RNO-913531  | 6    | -0.353659 | -0.898999 | 0.571429  | 1.000000  | 1.000      |
| 672 | GOBP.REGULATION.OF.METAL.ION.TRANSPORT            | GO-0010959    | 6    | -0.353659 | -0.907339 | 0.563798  | 1.000000  | 1.000      |
| 673 | GOBP.REGULATION.OF.POSTSYNAPTIC.MEMBRANE.POTEN... | GO-0060078    | 14   | -0.249274 | -0.909562 | 0.581590  | 1.000000  | 1.000      |
| 674 | GOBP.DICARBOXYLIC.ACID.TRANSPORT                  | GO-0006835    | 5    | -0.396002 | -0.925038 | 0.508065  | 1.000000  | 1.000      |
| 675 | GOBP.NERVE.DEVELOPMENT                            | GO-0021675    | 9    | -0.311409 | -0.932972 | 0.517915  | 1.000000  | 1.000      |
| 676 | GOBP.POSITIVE.REGULATION.OF.LONG.TERM.SYNAPTIC... | GO-1900273    | 5    | -0.397590 | -0.941043 | 0.462908  | 1.000000  | 1.000      |
| 677 | GOBP.NEGATIVE.REGULATION.OF.PROTEIN.CATABOLIC...  | GO-0042177    | 5    | -0.404920 | -0.946734 | 0.501577  | 1.000000  | 1.000      |
| 678 | GOBP.ACIDIC.AMINO.ACID.TRANSPORT                  | GO-0015800    | 5    | -0.396002 | -0.951964 | 0.462567  | 1.000000  | 1.000      |
| 679 | GOBP.MONOCARBOXYLIC.ACID.TRANSPORT                | GO-0015718    | 5    | -0.396002 | -0.953832 | 0.510324  | 1.000000  | 1.000      |
| 680 | GOBP.NEURON.APOPTOTIC.PROCESS                     | GO-0051402    | 12   | -0.285176 | -0.969210 | 0.488722  | 1.000000  | 1.000      |
| 681 | GOBP.PROTEIN.COMPLEX.OLIGOMERIZATION              | GO-0051259    | 6    | -0.390244 | -0.984699 | 0.444444  | 1.000000  | 1.000      |
| 682 | GOBP.NEGATIVE.REGULATION.OF.NEURON.DEATH          | GO-1901215    | 11   | -0.296922 | -0.993928 | 0.460993  | 1.000000  | 1.000      |
| 683 | GOBP.REGULATION.OF.NEURON.DIFFERENTIATION         | GO-0045664    | 5    | -0.421687 | -0.995958 | 0.404624  | 1.000000  | 1.000      |
| 684 | GOBP.ADENYLATE.CYCLASE.INHIBITING.G.PROTEIN.CO... | GO-0007196    | 5    | -0.424679 | -1.019082 | 0.368732  | 1.000000  | 1.000      |
| 685 | GOBP.REGULATION.OF.LONG.TERM.SYNAPTIC.POTENTIA... | GO-1900271    | 6    | -0.402439 | -1.025188 | 0.393082  | 1.000000  | 1.000      |

Continuation of Table S16

| NAME                                                  | ID            | SIZE | ES        | NES       | NOM.p.val | FDR.q.val | FWER.p.val |
|-------------------------------------------------------|---------------|------|-----------|-----------|-----------|-----------|------------|
| 686 GOBP-CATION-TRANSMEMBRANE-TRANSPORT               | GO-0098655    | 18   | -0.259978 | -1.025837 | 0.378855  | 1.000000  | 1.000      |
| 687 GOBP-REGULATION-OF-TRANSPORTER-ACTIVITY           | GO-0032409    | 17   | -0.270550 | -1.027270 | 0.386555  | 1.000000  | 1.000      |
| 688 REACTOME-NEURONAL-SYSTEM                          | R-RNO-112316  | 26   | -0.240174 | -1.029561 | 0.390110  | 1.000000  | 1.000      |
| 689 REACTOME-TRAFFICKING-OF-AMPA-RECEPTORS            | R-RNO-399719  | 11   | -0.326846 | -1.044494 | 0.355072  | 1.000000  | 1.000      |
| 690 REACTOME-DAG-AND-IP3-SIGNALING                    | R-RNO-1489509 | 8    | -0.362500 | -1.054230 | 0.368601  | 1.000000  | 1.000      |
| 691 GOBP-PERIPHERAL-NEUROUS-SYSTEM-DEVELOPMENT        | GO-0007422    | 9    | -0.341772 | -1.072286 | 0.341297  | 1.000000  | 1.000      |
| 692 REACTOME-NEUROTRANSMITTER-RECEPTORS-AND-POSTSY... | R-RNO-112314  | 22   | -0.264780 | -1.074473 | 0.324074  | 1.000000  | 1.000      |
| 693 GOBP-REGULATION-OF-CATION-TRANSMEMBRANE-TRANSPORT | GO-1904062    | 16   | -0.290334 | -1.111868 | 0.321429  | 1.000000  | 1.000      |
| 694 REACTOME-ACTIVATION-OF-NMDA-RECEPTORS-AND-POST... | R-RNO-442755  | 16   | -0.303180 | -1.115232 | 0.330709  | 1.000000  | 1.000      |
| 695 GOBP-REGULATION-OF-SIGNALING-RECEPTOR-ACTIVITY    | GO-0010469    | 14   | -0.308697 | -1.115484 | 0.270270  | 1.000000  | 1.000      |
| 696 REACTOME-TRANSCRIPTIONAL-REGULATION-BY-MECP2      | R-RNO-8986944 | 7    | -0.400512 | -1.118382 | 0.273927  | 1.000000  | 1.000      |
| 697 REACTOME-TRANSMISSION-ACROSS-CHEMICAL-SYNAPSES    | R-RNO-112315  | 23   | -0.287669 | -1.194233 | 0.216667  | 0.879095  | 1.000      |
| 698 GOBP-REGULATION-OF-NEUROTRANSMITTER-RECEPTOR-A... | GO-0099601    | 13   | -0.343780 | -1.197952 | 0.253012  | 0.908238  | 1.000      |
| 699 REACTOME-VESICLE-MEDIATED-TRANSPORT               | R-RNO-5653656 | 5    | -0.518072 | -1.218409 | 0.198347  | 0.880527  | 1.000      |
| 700 REACTOME-MEMBRANE-TRAFFICKING                     | R-RNO-199991  | 5    | -0.518072 | -1.226903 | 0.201149  | 0.895837  | 1.000      |
| 701 GOBP-RESPONSE-TO-ALKALOID                         | GO-0043279    | 5    | -0.530120 | -1.242053 | 0.184358  | 0.892776  | 1.000      |
| 702 GOBP-REGULATION-OF-CATION-CHANNEL-ACTIVITY        | GO-2001257    | 14   | -0.344012 | -1.242065 | 0.188679  | 0.945244  | 1.000      |
| 703 GOBP-REGULATION-OF-NEUROTRANSMITTER-TRANSPORT     | GO-0051588    | 6    | -0.487805 | -1.248661 | 0.193651  | 0.978972  | 1.000      |
| 704 GOBP-VESICLE-MEDIATED-TRANSPORT-IN-SYNAPSE        | GO-0099003    | 7    | -0.456790 | -1.250071 | 0.201220  | 1.000000  | 1.000      |
| 705 GOBP-NEUROTRANSMITTER-SECRETION                   | GO-0007269    | 6    | -0.487805 | -1.257625 | 0.179331  | 1.000000  | 1.000      |
| 706 REACTOME-UNBLOCKING-OF-NMDA-RECEPTORS-GLUTAMAT... | R-RNO-438066  | 12   | -0.385784 | -1.301319 | 0.125000  | 0.976863  | 1.000      |
| 707 REACTOME-PROTEIN-PROTEIN-INTERACTIONS-AT-SYNAPSES | R-RNO-6794362 | 12   | -0.380925 | -1.314834 | 0.132353  | 1.000000  | 1.000      |
| 708 REACTOME-TRAFFICKING-OF-GLUR2-CONTAINING-AMPA-... | R-RNO-416993  | 8    | -0.468963 | -1.343074 | 0.132492  | 0.972490  | 1.000      |
| 709 GOBP-NEUROTRANSMITTER-TRANSPORT                   | GO-0006836    | 7    | -0.493827 | -1.352076 | 0.149123  | 1.000000  | 1.000      |
| 710 GOBP-REGULATION-OF-NEUROTRANSMITTER-LEVELS        | GO-0001505    | 7    | -0.493827 | -1.356853 | 0.103896  | 1.000000  | 1.000      |
| 711 GOBP-REGULATION-OF-NMDA-RECEPTOR-ACTIVITY         | GO-2000310    | 10   | -0.435820 | -1.373401 | 0.104918  | 1.000000  | 1.000      |
| 712 GOBP-MEMORY                                       | GO-0007613    | 13   | -0.402633 | -1.382369 | 0.108787  | 1.000000  | 1.000      |
| 713 REACTOME-SYNAPTIC-ADHESION-LIKE-MOLECULES         | R-RNO-8849932 | 9    | -0.475681 | -1.442328 | 0.064286  | 1.000000  | 1.000      |
| 714 GOBP-GLUTAMATE-RECEPTOR-SIGNALING-PATHWAY         | GO-0007215    | 17   | -0.392060 | -1.442749 | 0.074074  | 1.000000  | 1.000      |
| 715 GOBP-IONOTROPIC-GLUTAMATE-RECEPTOR-SIGNALING-P... | GO-0035235    | 9    | -0.474252 | -1.448275 | 0.088328  | 1.000000  | 1.000      |
| 716 GOBP-NEGATIVE-REGULATION-OF-NEURON-APOPTOTIC-P... | GO-0043524    | 8    | -0.499217 | -1.468829 | 0.057239  | 1.000000  | 1.000      |
| 717 GOBP-SENSORY-PERCEPTION                           | GO-0007600    | 9    | -0.478823 | -1.484719 | 0.071429  | 1.000000  | 1.000      |
| 718 REACTOME-G-ALPHA-Z-SIGNALING-EVENTS               | R-RNO-418597  | 5    | -0.674699 | -1.613486 | 0.043353  | 1.000000  | 0.999      |

End of Table



Continuation of Table S17

| NAME | ID                                                | SIZE | ES       | NES      | NOM.p.val | FDR.q.val | FWER.p.val |
|------|---------------------------------------------------|------|----------|----------|-----------|-----------|------------|
| 41   | GOBP-SYNAPSE_ORGANIZATION                         | 17   | 0.367498 | 1.206755 | 0.193995  | 1.000000  | 1.000      |
| 42   | GOBP-ANION_TRANSMEMBRANE_TRANSPORT                | 7    | 0.484816 | 1.202431 | 0.245119  | 1.000000  | 1.000      |
| 43   | GOBP-POSITIVE_REGULATION_OF_CELL_CELL_ADHESION    | 5    | 0.566699 | 1.199950 | 0.258621  | 1.000000  | 1.000      |
| 44   | GOBP-POSITIVE_REGULATION_OF_INTRACELLULAR_SIGN... | 14   | 0.375734 | 1.193349 | 0.252294  | 1.000000  | 1.000      |
| 45   | GOBP-POSITIVE_REGULATION_OF_CELL_PROJECTION_OR... | 10   | 0.427649 | 1.184902 | 0.231626  | 1.000000  | 1.000      |
| 46   | GOBP-RESPONSE_TO_ETHANOL                          | 5    | 0.542169 | 1.183501 | 0.296460  | 1.000000  | 1.000      |
| 47   | HALLMARK-APOPTOSIS                                | 6    | 0.510464 | 1.178983 | 0.266385  | 1.000000  | 1.000      |
| 48   | GOBP-POSITIVE_REGULATION_OF_CELLULAR_COMPONENT... | 9    | 0.434788 | 1.169869 | 0.261641  | 1.000000  | 1.000      |
| 49   | GOBP-REGULATION_OF_CELL_DEVELOPMENT               | 15   | 0.370353 | 1.157085 | 0.290179  | 1.000000  | 1.000      |
| 50   | GOBP-POSITIVE_REGULATION_OF_MYELOID_LEUKOCYTE...  | 6    | 0.503249 | 1.156960 | 0.303226  | 1.000000  | 1.000      |
| 51   | GOBP-SYNAPTIC_TRANSMISSION_GUTAMATERGIC           | 13   | 0.384734 | 1.156334 | 0.260090  | 1.000000  | 1.000      |
| 52   | GOBP-REGULATION_OF_CELLULAR_CATABOLIC_PROCESS     | 10   | 0.416026 | 1.156097 | 0.261574  | 1.000000  | 1.000      |
| 53   | GOBP-POSITIVE_REGULATION_OF_PHOSPHATIDYLINOSIT... | 5    | 0.538615 | 1.152584 | 0.316929  | 1.000000  | 1.000      |
| 54   | GOBP-POSITIVE_REGULATION_OF_CELL_DEVELOPMENT      | 12   | 0.379869 | 1.150691 | 0.272517  | 1.000000  | 1.000      |
| 55   | GOBP-POSITIVE_REGULATION_OF_SYNAPTIC_TRANSMISSION | 15   | 0.365869 | 1.148001 | 0.274882  | 1.000000  | 1.000      |
| 56   | GOBP-REGULATION_OF_SYNAPTIC_TRANSMISSION_GLUTA... | 12   | 0.390195 | 1.145650 | 0.281250  | 1.000000  | 1.000      |
| 57   | GOBP-POSITIVE_REGULATION_OF_PROTEIN_KINASE_ACT... | 19   | 0.379022 | 1.141511 | 0.274827  | 1.000000  | 1.000      |
| 58   | GOBP-REGULATION_OF_POSTSYNAPSE_ORGANIZATION       | 6    | 0.498165 | 1.137474 | 0.307036  | 1.000000  | 1.000      |
| 59   | GOBP-POSITIVE_REGULATION_OF_LONG_TERM_SYNAPTIC... | 5    | 0.526397 | 1.134293 | 0.326489  | 1.000000  | 1.000      |
| 60   | GOBP-POSITIVE_REGULATION_OF_CELL_GROWTH           | 6    | 0.477160 | 1.131145 | 0.321962  | 1.000000  | 1.000      |
| 61   | GOBP-REGULATION_OF_CATION_CHANNEL_ACTIVITY        | 14   | 0.360711 | 1.129517 | 0.286667  | 1.000000  | 1.000      |
| 62   | REACTOME-ASSEMBLY_AND_CELL_SURFACE_PRESENTATIO... | 8    | 0.438776 | 1.128746 | 0.292411  | 1.000000  | 1.000      |
| 63   | GOBP-POSITIVE_REGULATION_OF_SMOOTH_MUSCLE_CELL... | 5    | 0.518698 | 1.128432 | 0.347107  | 1.000000  | 1.000      |
| 64   | GOBP-POSITIVE_REGULATION_OF_TRANSFERASE_ACTIVITY  | 20   | 0.329227 | 1.125665 | 0.286976  | 1.000000  | 1.000      |
| 65   | GOBP-MEMBRANE_PROTEIN_PROTEOLYSIS                 | 6    | 0.485537 | 1.122872 | 0.318275  | 1.000000  | 1.000      |
| 66   | GOBP-REGULATION_OF_INTRACELLULAR_SIGNAL_TRANSD... | 21   | 0.325240 | 1.121250 | 0.291866  | 1.000000  | 1.000      |
| 67   | REACTOME-NEGATIVE_REGULATION_OF_NMDA_RECEPTOR...  | 8    | 0.437876 | 1.115430 | 0.317181  | 1.000000  | 1.000      |
| 68   | GOBP-POSITIVE_REGULATION_OF_NEUROGENESIS          | 12   | 0.379869 | 1.113779 | 0.310421  | 1.000000  | 1.000      |
| 69   | REACTOME_CYTOKINE_SIGNALING_IN_IMMUNE_SYSTEM      | 21   | 0.323308 | 1.109734 | 0.294664  | 1.000000  | 1.000      |
| 70   | GOBP-REGIONALIZATION                              | 6    | 0.471138 | 1.108806 | 0.321962  | 1.000000  | 1.000      |
| 71   | GOBP-NEUROINFLAMMATORY_RESPONSE                   | 5    | 0.505053 | 1.107442 | 0.344262  | 1.000000  | 1.000      |
| 72   | GOBP-RECEPTOR_INTERNALIZATION                     | 5    | 0.504324 | 1.107137 | 0.343313  | 1.000000  | 1.000      |
| 73   | GOBP-POSITIVE_REGULATION_OF_NERVOUS_SYSTEM_DEV... | 12   | 0.379869 | 1.099315 | 0.350000  | 1.000000  | 1.000      |
| 74   | GOBP-PATTERN_SPECIFICATION_PROCESS                | 6    | 0.471138 | 1.096640 | 0.330595  | 1.000000  | 1.000      |
| 75   | GOBP-CALCIUM-MEDIATED_SIGNALING                   | 10   | 0.400984 | 1.095929 | 0.334047  | 1.000000  | 1.000      |
| 76   | GOBP-POSITIVE_REGULATION_OF_DNA_BINDING_TRANSC... | 10   | 0.398091 | 1.095271 | 0.327434  | 1.000000  | 1.000      |
| 77   | GOBP-CHEMICAL_SYNAPTIC_TRANSMISSION_POSTSYNAPTIC  | 9    | 0.406591 | 1.088896 | 0.361419  | 1.000000  | 1.000      |
| 78   | GOBP-REGULATION_OF_CATABOLIC_PROCESS              | 13   | 0.358236 | 1.086171 | 0.345416  | 1.000000  | 1.000      |
| 79   | GOBP-RECEPTOR_METABOLIC_PROCESS                   | 5    | 0.504324 | 1.082956 | 0.364017  | 1.000000  | 1.000      |
| 80   | REACTOME-DEVELOPMENTAL_BIOLOGY                    | 23   | 0.311160 | 1.081602 | 0.340090  | 1.000000  | 1.000      |
| 81   | REACTOME_LONG_TERM_POTENTIATION                   | 10   | 0.393010 | 1.081486 | 0.359140  | 1.000000  | 1.000      |
| 82   | REACTOME_SYNAPTIC_ADHESION_LIKE_MOLECULES         | 9    | 0.402539 | 1.079910 | 0.350731  | 1.000000  | 1.000      |
| 83   | GOBP-NEGATIVE_REGULATION_OF_CATABOLIC_PROCESS     | 8    | 0.416918 | 1.070067 | 0.354626  | 1.000000  | 1.000      |

Continuation of Table S17

| NAME                                                  | ID            | SIZE | ES       | NES      | NOM.p.val | FDR.q.val | FWER.p.val |
|-------------------------------------------------------|---------------|------|----------|----------|-----------|-----------|------------|
| 84 GOBP-NEGATIVE-REGULATION-OF-PEPTIDASE-ACTIVITY     | GO-0010466    | 6    | 0.471463 | 1.077746 | 0.371179  | 1.000000  | 1.000      |
| 85 GOBP-BIOLOGICAL-PROCESS-INVOLVED-IN-SYMBIOTIC....  | GO-004440     | 11   | 0.381215 | 1.077044 | 0.371495  | 1.000000  | 1.000      |
| 86 GOBP-REGULATION-OF-PROTEIN-CATABOLIC-PROCESS       | GO-0042176    | 7    | 0.434353 | 1.076275 | 0.362869  | 1.000000  | 1.000      |
| 87 REACTOME-ACTIVATION-OF-NMDA-RECEPTORS-AND-POST...  | R-RNO-442755  | 16   | 0.337730 | 1.075855 | 0.350515  | 1.000000  | 1.000      |
| 88 GOBP-DEVELOPMENTAL-MATURATION                      | GO-0021700    | 5    | 0.501132 | 1.075507 | 0.395299  | 1.000000  | 1.000      |
| 89 GOBP-LEARNING                                      | GO-0007612    | 13   | 0.355124 | 1.075018 | 0.343750  | 1.000000  | 1.000      |
| 90 GOBP-NEGATIVE-REGULATION-OF-LOCOMOTION             | GO-0040013    | 5    | 0.490676 | 1.070620 | 0.403614  | 1.000000  | 1.000      |
| 91 GOBP-SMALL-GTPASE-MEDIATED-SIGNAL-TRANSDUCTION     | GO-0007264    | 8    | 0.407477 | 1.066816 | 0.364583  | 1.000000  | 1.000      |
| 92 GOBP-AMEBOIDAL-TYPE-CELL-MIGRATION                 | GO-0001667    | 11   | 0.371425 | 1.061049 | 0.374449  | 1.000000  | 1.000      |
| 93 GOBP-POSITIVE-REGULATION-OF-PROTEIN-TYROSINE-K...  | GO-0061098    | 5    | 0.489330 | 1.059815 | 0.388664  | 1.000000  | 1.000      |
| 94 GOBP-REGULATION-OF-VASCULATURE-DEVELOPMENT         | GO-1901342    | 5    | 0.494091 | 1.059164 | 0.397727  | 1.000000  | 1.000      |
| 95 GOBP-REGULATION-OF-MEMBRANE-POTENTIAL              | GO-0042391    | 17   | 0.325084 | 1.058898 | 0.383178  | 1.000000  | 1.000      |
| 96 GOBP-GLIAL-CELL-DIFFERENTIATION                    | GO-0010001    | 10   | 0.386239 | 1.058745 | 0.344754  | 1.000000  | 1.000      |
| 97 GOBP-CELL-MIGRATION                                | GO-0016477    | 22   | 0.299695 | 1.058637 | 0.373239  | 1.000000  | 1.000      |
| 98 GOBP-MAINTENANCE-OF-LOCATION                       | GO-0051235    | 7    | 0.445555 | 1.058433 | 0.375271  | 1.000000  | 1.000      |
| 99 GOBP-REGULATION-OF-PROTEIN-TYROSINE-KINASE-ACT...  | GO-0061097    | 5    | 0.489330 | 1.055188 | 0.407834  | 1.000000  | 1.000      |
| 100 GOBP-REGULATION-OF-PEPTIDE-SECRETION              | GO-0002791    | 7    | 0.418152 | 1.049450 | 0.406393  | 1.000000  | 1.000      |
| 101 GOBP-OSTEOBLAST-DIFFERENTIATION                   | GO-0001649    | 5    | 0.476929 | 1.045568 | 0.405063  | 1.000000  | 1.000      |
| 102 GOBP-POSITIVE-REGULATION-OF-ION-TRANSPORT         | GO-0043270    | 17   | 0.310992 | 1.044829 | 0.378076  | 1.000000  | 1.000      |
| 103 GOBP-REGULATION-OF-ENDOTHELIAL-CELL-MIGRATION     | GO-0010594    | 5    | 0.416726 | 1.044273 | 0.411628  | 1.000000  | 1.000      |
| 104 GOBP-ASSOCIATIVE-LEARNING                         | GO-0008306    | 7    | 0.418025 | 1.041709 | 0.405579  | 1.000000  | 1.000      |
| 105 GOBP-REGULATION-OF-MAP-KINASE-ACTIVITY            | GO-0024111    | 6    | 0.451399 | 1.039386 | 0.405830  | 1.000000  | 1.000      |
| 106 GOBP-CELLULAR-COMPONENT-DISASSEMBLY               | GO-0043406    | 6    | 0.437450 | 1.038454 | 0.412903  | 1.000000  | 1.000      |
| 107 GOBP-POSITIVE-REGULATION-OF-MAP-KINASE-ACTIVITY   | GO-0006954    | 12   | 0.359969 | 1.037183 | 0.396514  | 1.000000  | 1.000      |
| 108 GOBP-INFLAMMATORY-RESPONSE                        | GO-0006006    | 6    | 0.442840 | 1.032139 | 0.415778  | 1.000000  | 1.000      |
| 109 GOBP-GLUCOSE-METABOLIC-PROCESS                    | GO-0009057    | 12   | 0.349866 | 1.031642 | 0.404922  | 1.000000  | 1.000      |
| 110 GOBP-MACROMOLECULE-CATABOLIC-PROCESS              | GO-0045859    | 22   | 0.293744 | 1.028128 | 0.401478  | 1.000000  | 1.000      |
| 111 GOBP-REGULATION-OF-PROTEIN-KINASE-ACTIVITY        | GO-0005996    | 6    | 0.442840 | 1.026317 | 0.422078  | 1.000000  | 1.000      |
| 112 GOBP-MONOSACCHARIDE-METABOLIC-PROCESS             | GO-0043085    | 30   | 0.272058 | 1.026071 | 0.427184  | 1.000000  | 1.000      |
| 113 GOBP-POSITIVE-REGULATION-OF-CATALYTIC-ACTIVITY    | GO-0051270    | 15   | 0.327632 | 1.024178 | 0.433036  | 1.000000  | 1.000      |
| 114 GOBP-REGULATION-OF-CELLULAR-COMPONENT-MOVEMENT    | GO-0050900    | 6    | 0.439851 | 1.016347 | 0.451745  | 1.000000  | 1.000      |
| 115 GOBP-LEUKOCYTE-MIGRATION                          | GO-0043933    | 14   | 0.323505 | 1.012129 | 0.432314  | 1.000000  | 1.000      |
| 116 GOBP-PROTEIN-CONTAINING-COMPLEX-SUBUNIT-ORGANI... | GO-0034330    | 19   | 0.303180 | 1.012069 | 0.422062  | 1.000000  | 1.000      |
| 117 GOBP-CELL-JUNCTION-ORGANIZATION                   | GO-0051338    | 22   | 0.293744 | 1.009808 | 0.415423  | 1.000000  | 1.000      |
| 118 GOBP-REGULATION-OF-TRANSFERASE-ACTIVITY           | R-RNO-9675108 | 15   | 0.321819 | 1.008948 | 0.463470  | 1.000000  | 1.000      |
| 119 REACTOME-NERVOUS-SYSTEM-DEVELOPMENT               | GO-1903708    | 7    | 0.420502 | 1.002097 | 0.445148  | 1.000000  | 1.000      |
| 120 GOBP-POSITIVE-REGULATION-OF-HEMOPOIESIS           | GO-0006518    | 12   | 0.338941 | 0.995506 | 0.436242  | 1.000000  | 1.000      |
| 121 GOBP-PEPTIDE-METABOLIC-PROCESS                    | GO-000187     | 6    | 0.437450 | 0.991307 | 0.470982  | 1.000000  | 1.000      |
| 122 GOBP-ACTIVATION-OF-MAPK-ACTIVITY                  | GO-0097191    | 7    | 0.407963 | 0.989224 | 0.441176  | 1.000000  | 1.000      |
| 123 GOBP-EXTRINSIC-APOPTOTIC-SIGNALING-PATHWAY        | GO-0060292    | 5    | 0.448846 | 0.987093 | 0.477974  | 1.000000  | 1.000      |
| 124 GOBP-LONG-TERM-SYNAPTIC-DEPRESSION                | GO-0008361    | 5    | 0.455062 | 0.986457 | 0.465217  | 1.000000  | 1.000      |
| 125 GOBP-REGULATION-OF-CELL-SIZE                      | GO-0060078    | 14   | 0.322480 | 0.983107 | 0.475059  | 1.000000  | 1.000      |
| 126 GOBP-REGULATION-OF-POSTSYNAPTIC-MEMBRANE-POTEN... |               |      |          |          |           |           |            |

Continuation of Table S17

| NAME | ID                                                  | SIZE | ES       | NES      | NOM.p.val | FDR.q.val | FWER.p.val |
|------|-----------------------------------------------------|------|----------|----------|-----------|-----------|------------|
| 127  | GOBP-REGULATION-OF_GLIOGENESIS                      | 5    | 0.450503 | 0.977214 | 0.484009  | 1.000000  | 1.000      |
| 128  | GOBP-RESPONSE-TO_NERVE_GROWTH_FACTOR                | 7    | 0.407407 | 0.972910 | 0.474012  | 1.000000  | 1.000      |
| 129  | GOBP-CELLULAR-AMIDE-METABOLIC-PROCESS               | 13   | 0.324687 | 0.969786 | 0.484234  | 1.000000  | 1.000      |
| 130  | GOBP-REGULATION-OF_EXTRINSIC_APOPTOTIC_SIGNALING... | 6    | 0.417758 | 0.967784 | 0.511677  | 1.000000  | 1.000      |
| 131  | GOBP-MULTICELLULAR-ORGANISMAL-RESPONSE-TO_STRESS    | 5    | 0.445724 | 0.966886 | 0.479570  | 1.000000  | 1.000      |
| 132  | GOBP-REGULATION-OF_DEVELOPMENTAL_GROWTH             | 9    | 0.364100 | 0.965483 | 0.516269  | 1.000000  | 1.000      |
| 133  | GOBP-POSITIVE-REGULATION-OF_BINDING                 | 6    | 0.413650 | 0.963924 | 0.484979  | 1.000000  | 1.000      |
| 134  | GOBP-POSITIVE-REGULATION-OF_GLIOGENESIS             | 5    | 0.450503 | 0.963718 | 0.495868  | 1.000000  | 1.000      |
| 135  | GOBP-REGULATION-OF_CELL_PROJECTION_ORGANIZATION     | 20   | 0.283550 | 0.957109 | 0.502222  | 1.000000  | 1.000      |
| 136  | HALLMARK-EPITHELIAL-MESENCHYMAL-TRANSITION          | 5    | 0.438653 | 0.955454 | 0.524590  | 1.000000  | 1.000      |
| 137  | GOBP-DENDRITE-DEVELOPMENT                           | 9    | 0.364871 | 0.953309 | 0.531959  | 1.000000  | 1.000      |
| 138  | GOBP-NEGATIVE-REGULATION-OF_APOPTOTIC_SIGNALING...  | 7    | 0.387210 | 0.947575 | 0.505643  | 1.000000  | 1.000      |
| 139  | GOBP-LEUKOCYTE-CELL-CELL-ADHESION                   | 6    | 0.415721 | 0.946043 | 0.516340  | 1.000000  | 1.000      |
| 140  | GOBP-LIPID-METABOLIC-PROCESS                        | 10   | 0.351092 | 0.945994 | 0.489177  | 1.000000  | 1.000      |
| 141  | GOBP-REGULATION-OF-OSTEOCLAST-DIFFERENTIATION       | 5    | 0.443696 | 0.944510 | 0.548387  | 1.000000  | 1.000      |
| 142  | GOBP-REGULATION-OF-EPITHELIAL-CELL-MIGRATION        | 6    | 0.402629 | 0.939678 | 0.521839  | 1.000000  | 1.000      |
| 143  | GOBP-NEGATIVE-REGULATION-OF_CELL-DEVELOPMENT        | 6    | 0.398058 | 0.937006 | 0.520971  | 1.000000  | 1.000      |
| 144  | GOBP-POSITIVE-REGULATION-OF-PEPTIDYL-SERINE-PH...   | 8    | 0.365276 | 0.936772 | 0.534216  | 1.000000  | 1.000      |
| 145  | GOBP-POSITIVE-REGULATION-OF_MYELOID-CELL_DIFFER...  | 7    | 0.371227 | 0.935273 | 0.557576  | 1.000000  | 1.000      |
| 146  | GOBP-POSITIVE-REGULATION-OF_DEVELOPMENTAL-PROCESS   | 32   | 0.249967 | 0.934314 | 0.563380  | 1.000000  | 1.000      |
| 147  | REACTOME-INFECTIOUS-DISEASE                         | 13   | 0.303754 | 0.932967 | 0.498824  | 1.000000  | 1.000      |
| 148  | GOBP-CELL-SURFACE-RECEPTOR-SIGNALING-PATHWAY-I...   | 15   | 0.298042 | 0.927256 | 0.544643  | 1.000000  | 1.000      |
| 149  | GOBP-POSITIVE-REGULATION-OF_CELL-ADHESION           | 7    | 0.382311 | 0.928428 | 0.551148  | 1.000000  | 1.000      |
| 150  | GOBP-POSITIVE-REGULATION-OF_LOCOMOTION              | 11   | 0.328671 | 0.927256 | 0.548753  | 1.000000  | 1.000      |
| 151  | GOBP-POSITIVE-REGULATION-OF_HYDROLASE-ACTIVITY      | 16   | 0.282051 | 0.925516 | 0.557920  | 1.000000  | 1.000      |
| 152  | GOBP-REGULATION-OF-PEPTIDYL-SERINE-PHOSPHORYLA...   | 8    | 0.365276 | 0.922288 | 0.520607  | 1.000000  | 1.000      |
| 153  | GOBP-REGULATION-OF-NEUROGENESIS                     | 14   | 0.304957 | 0.921722 | 0.562637  | 1.000000  | 1.000      |
| 154  | GOBP-POSITIVE-REGULATION-OF_SMALL-MOLECULE-MET...   | 5    | 0.431685 | 0.917948 | 0.566160  | 1.000000  | 1.000      |
| 155  | GOBP-LONG-TERM-MEMORY                               | 6    | 0.403833 | 0.916711 | 0.556769  | 1.000000  | 1.000      |
| 156  | GOBP-DICARBOXYLIC-ACID-TRANSPORT                    | 5    | 0.425305 | 0.914108 | 0.551579  | 1.000000  | 1.000      |
| 157  | GOBP-PROTEOLYSIS                                    | 17   | 0.277918 | 0.911478 | 0.580645  | 1.000000  | 1.000      |
| 158  | GOBP-ACIDIC-AMINO-ACID-TRANSPORT                    | 5    | 0.425305 | 0.909964 | 0.567194  | 1.000000  | 1.000      |
| 159  | GOBP-MONOCARBOXYLIC-ACID-TRANSPORT                  | 5    | 0.425305 | 0.906268 | 0.567265  | 1.000000  | 1.000      |
| 160  | GOBP-PHAGOCYTOSIS                                   | 5    | 0.425305 | 0.905543 | 0.590810  | 1.000000  | 1.000      |
| 161  | GOBP-REGULATION-OF_NERVOUS_SYSTEM_DEVELOPMENT       | 15   | 0.283040 | 0.902900 | 0.584245  | 1.000000  | 1.000      |
| 162  | GOBP-REGULATION-OF_NERVOUS_SYSTEM_PROCESS           | 8    | 0.360080 | 0.902207 | 0.548246  | 1.000000  | 1.000      |
| 163  | GOBP-PROTEIN_CATABOLIC-PROCESS                      | 8    | 0.356101 | 0.896435 | 0.588636  | 1.000000  | 1.000      |
| 164  | GOBP-OSTEOCLAST-DIFFERENTIATION                     | 6    | 0.393031 | 0.896094 | 0.577825  | 1.000000  | 1.000      |
| 165  | GOBP-DEFENSE-RESPONSE                               | 19   | 0.267423 | 0.894638 | 0.623810  | 1.000000  | 1.000      |
| 166  | GOBP-REGULATION-OF_BINDING                          | 11   | 0.306993 | 0.889018 | 0.598699  | 1.000000  | 1.000      |
| 167  | GOBP-DEVELOPMENTAL-GROWTH                           | 10   | 0.327520 | 0.887204 | 0.594714  | 1.000000  | 1.000      |
| 168  | GOBP-FATTY-ACID-TRANSPORT                           | 6    | 0.384886 | 0.884425 | 0.614256  | 1.000000  | 1.000      |
| 169  | REACTOME-CREB1-PHOSPHORYLATION-THROUGH_NMDA_RE...   | 8    | 0.357587 | 0.883979 | 0.609244  | 1.000000  | 1.000      |

Continuation of Table S17

| NAME | ID                                                | SIZE | ES       | NES      | NOM.p.val | FDR.q.val | FWER.p.val |
|------|---------------------------------------------------|------|----------|----------|-----------|-----------|------------|
| 170  | GOBP-GLIOGENESIS                                  | 12   | 0.294140 | 0.876877 | 0.619835  | 1.000000  | 1.000      |
| 171  | GOBP-IGNOTROPIC-GLUTAMATE-RECEPTOR-SIGNALING.P... | 9    | 0.325609 | 0.874038 | 0.633640  | 1.000000  | 1.000      |
| 172  | GOBP-CARBOHYDRATE-DERIVATIVE-METABOLIC-PROCESS    | 7    | 0.358171 | 0.868516 | 0.614512  | 1.000000  | 1.000      |
| 173  | GOBP-REGULATION-OF-ANION-TRANSMEMBRANE-TRANSPORT  | 5    | 0.396508 | 0.861733 | 0.640000  | 1.000000  | 1.000      |
| 174  | GOBP-REGULATION-OF-MITOTIC-CELL-CYCLE             | 5    | 0.398101 | 0.856412 | 0.605603  | 1.000000  | 1.000      |
| 175  | GOBP-REGULATION-OF-RECEPTOR-MEDIATED-ENDOCYTOSIS  | 5    | 0.389182 | 0.856377 | 0.642105  | 1.000000  | 1.000      |
| 176  | HALLMARK-P13K-AKT-MTOR-SIGNALING                  | 6    | 0.379046 | 0.856030 | 0.623950  | 1.000000  | 1.000      |
| 177  | GOBP-REGULATION-OF-DEFENSE-RESPONSE               | 7    | 0.344986 | 0.855838 | 0.621681  | 1.000000  | 1.000      |
| 178  | GOBP-REGULATION-OF-PHOSPHATIDYLINOSITOL-3-KINA... | 6    | 0.365162 | 0.853868 | 0.645570  | 1.000000  | 1.000      |
| 179  | GOBP-POSITIVE-REGULATION-OF-IMMUNE-SYSTEM-PROCESS | 18   | 0.259599 | 0.853585 | 0.695175  | 1.000000  | 1.000      |
| 180  | GOBP-RESPONSE-TO-ACID-CHEMICAL                    | 6    | 0.356119 | 0.849036 | 0.612159  | 1.000000  | 1.000      |
| 181  | GOBP-CATION-TRANSPORT                             | 25   | 0.239421 | 0.847218 | 0.696471  | 1.000000  | 1.000      |
| 182  | GOBP-NEURON-PROJECTION-GUIDANCE                   | 9    | 0.315733 | 0.846694 | 0.646018  | 1.000000  | 1.000      |
| 183  | GOBP-ORGANONITROGEN-COMPOUND-CATABOLIC-PROCESS    | 9    | 0.314072 | 0.845971 | 0.654945  | 1.000000  | 1.000      |
| 184  | GOBP-REGULATION-OF-CELLULAR-COMPONENT-BIOGENESIS  | 10   | 0.311204 | 0.845318 | 0.634146  | 1.000000  | 1.000      |
| 185  | GOBP-REGULATION-OF-INFLAMMATORY-RESPONSE          | 7    | 0.344986 | 0.844846 | 0.639013  | 1.000000  | 1.000      |
| 186  | GOBP-OSSIFICATION                                 | 9    | 0.321536 | 0.843701 | 0.673709  | 1.000000  | 1.000      |
| 187  | GOBP-NEGATIVE-REGULATION-OF-CATALYTIC-ACTIVITY    | 17   | 0.265127 | 0.843126 | 0.688940  | 1.000000  | 1.000      |
| 188  | GOBP-INOSITOL-LIPID-MEDIATED-SIGNALING            | 8    | 0.325680 | 0.840450 | 0.664516  | 1.000000  | 1.000      |
| 189  | GOBP-REGULATION-OF-METAL-ION-TRANSPORT            | 6    | 0.366070 | 0.839500 | 0.649378  | 1.000000  | 1.000      |
| 190  | GOBP-BLOOD-VESSEL-ENDOTHELIAL-CELL-MIGRATION      | 8    | 0.324666 | 0.839001 | 0.629956  | 1.000000  | 1.000      |
| 191  | GOBP-EMBRYO-DEVELOPMENT                           | 14   | 0.271175 | 0.838341 | 0.697674  | 1.000000  | 1.000      |
| 192  | GOBP-NEGATIVE-REGULATION-OF-PROTEOLYSIS           | 8    | 0.329330 | 0.838054 | 0.672234  | 1.000000  | 1.000      |
| 193  | GOBP-ORGANIC-ANION-TRANSPORT                      | 6    | 0.359263 | 0.837877 | 0.612903  | 1.000000  | 1.000      |
| 194  | REACTOME-ANTI-INFLAMMATORY-RESPONSE-FAVOURING...  | 5    | 0.392749 | 0.837121 | 0.676349  | 1.000000  | 1.000      |
| 195  | GOBP-ENDOTHELIAL-CELL-MIGRATION                   | 8    | 0.324666 | 0.836888 | 0.658174  | 1.000000  | 1.000      |
| 196  | GOBP-AMINO-ACID-TRANSPORT                         | 6    | 0.359263 | 0.837728 | 0.651163  | 1.000000  | 1.000      |
| 197  | GOBP-REGULATION-OF-TRANSPORTER-ACTIVITY           | 17   | 0.257673 | 0.833500 | 0.704104  | 1.000000  | 1.000      |
| 198  | GOBP-POSITIVE-REGULATION-OF-CELLULAR-COMPONENT... | 24   | 0.228588 | 0.830867 | 0.719626  | 1.000000  | 1.000      |
| 199  | GOBP-ORGANOPHOSPHATE-METABOLIC-PROCESS            | 7    | 0.335993 | 0.829930 | 0.659836  | 1.000000  | 1.000      |
| 200  | REACTOME-TOLL-LIKE-RECEPTOR-TLR1-TLR2-CASCADE     | 8    | 0.318183 | 0.828919 | 0.639130  | 1.000000  | 1.000      |
| 201  | GOBP-NEGATIVE-REGULATION-OF-MULTICELLULAR-ORGA... | 15   | 0.263888 | 0.825812 | 0.722222  | 1.000000  | 1.000      |
| 202  | GOBP-ERK1-AND-ERK2-CASCADE                        | 5    | 0.380414 | 0.824145 | 0.696099  | 1.000000  | 1.000      |
| 203  | GOBP-POSITIVE-REGULATION-OF-MOLECULAR-FUNCTION    | 38   | 0.212001 | 0.823991 | 0.741206  | 1.000000  | 1.000      |
| 204  | REACTOME-TOLL-LIKE-RECEPTOR-CASCADES              | 8    | 0.318183 | 0.822216 | 0.686147  | 1.000000  | 1.000      |
| 205  | GOBP-POSITIVE-REGULATION-OF-DEVELOPMENTAL-GROWTH  | 7    | 0.322491 | 0.821554 | 0.699317  | 1.000000  | 1.000      |
| 206  | GOBP-PHOSPHATIDYLINOSITOL-3-KINASE-SIGNALING      | 8    | 0.332870 | 0.820578 | 0.653445  | 1.000000  | 1.000      |
| 207  | GOBP-NEGATIVE-REGULATION-OF-GENE-EXPRESSION       | 12   | 0.281832 | 0.820019 | 0.672414  | 1.000000  | 1.000      |
| 208  | GOBP-ION-HOMEOSTASIS                              | 16   | 0.260396 | 0.814869 | 0.709800  | 1.000000  | 1.000      |
| 209  | GOBP-CARBOXYLIC-ACID-TRANSPORT                    | 6    | 0.359263 | 0.811294 | 0.675676  | 1.000000  | 1.000      |
| 210  | GOBP-MYOTUBE-DIFFERENTIATION                      | 5    | 0.371388 | 0.810892 | 0.697425  | 1.000000  | 1.000      |
| 211  | GOBP-REGULATION-OF-MUSCLE-CELL-DIFFERENTIATION    | 6    | 0.354563 | 0.810393 | 0.699789  | 1.000000  | 1.000      |
| 212  | GOBP-HEART-DEVELOPMENT                            | 6    | 0.347103 | 0.809820 | 0.704782  | 1.000000  | 1.000      |

Continuation of Table S17

|     | NAME                                              | ID            | SIZE | ES       | NES      | NOM.p.val | FDR.q.val | FWER.p.val |
|-----|---------------------------------------------------|---------------|------|----------|----------|-----------|-----------|------------|
| 213 | GOBP-ORGANIC-ACID-TRANSPORT                       | GO-0015849    | 7    | 0.329990 | 0.808744 | 0.664336  | 1.000000  | 1.000      |
| 214 | GOBP-ADENYLATE-CYCLASE-INHIBITING-G-PROTEIN.CO... | GO-0007193    | 5    | 0.367498 | 0.805808 | 0.684322  | 1.000000  | 1.000      |
| 215 | REACTOME-TOLL-LIKE-RECEPTOR-9-TLR9-CASCADE        | R-RNO-168138  | 8    | 0.318183 | 0.805366 | 0.695279  | 1.000000  | 1.000      |
| 216 | GOBP-IN-UTERO-EMBRYONIC-DEVELOPMENT               | GO-0001701    | 8    | 0.317241 | 0.803982 | 0.709607  | 1.000000  | 1.000      |
| 217 | GOBP-RESPONSE-TO-NUTRIENT                         | GO-0007584    | 5    | 0.373494 | 0.803456 | 0.706383  | 1.000000  | 1.000      |
| 218 | GOBP-MUSCLE-CELL-DEVELOPMENT                      | GO-0005001    | 5    | 0.380880 | 0.802668 | 0.712153  | 1.000000  | 1.000      |
| 219 | REACTOME-MYD88-INDEPENDENT-TLR4-CASCADE           | R-RNO-166166  | 8    | 0.318183 | 0.801749 | 0.700214  | 1.000000  | 1.000      |
| 220 | GOBP-RECEPTOR-MEDIATED-ENDOCYTOSIS                | GO-0006898    | 6    | 0.349180 | 0.800684 | 0.692771  | 1.000000  | 1.000      |
| 221 | GOBP-REGULATION-OF-PEPTIDASE-ACTIVITY             | GO-00052547   | 10   | 0.292289 | 0.796440 | 0.712389  | 1.000000  | 1.000      |
| 222 | GOBP-CARDIAC-MUSCLE-TISSUE-DEVELOPMENT            | GO-00048738   | 6    | 0.347103 | 0.795046 | 0.702643  | 1.000000  | 1.000      |
| 223 | GOBP-INORGANIC-ION-TRANSMEMBRANE-TRANSPORT        | GO-00098660   | 9    | 0.302462 | 0.789109 | 0.737443  | 1.000000  | 1.000      |
| 224 | GOBP-REGULATION-OF-ENDOCYTOSIS                    | GO-00030100   | 6    | 0.337786 | 0.783627 | 0.740506  | 1.000000  | 1.000      |
| 225 | GOBP-POSITIVE-REGULATION-OF-MAPK-CASCADE          | GO-00043410   | 9    | 0.290787 | 0.781524 | 0.746204  | 1.000000  | 1.000      |
| 226 | GOBP-REGULATION-OF-PROTEIN-LOCALIZATION-TO-CEL... | GO-1904375    | 6    | 0.343577 | 0.780996 | 0.723577  | 1.000000  | 1.000      |
| 227 | REACTOME-EXTRACELLULAR-MATRIX-ORGANIZATION        | R-RNO-1474244 | 5    | 0.355376 | 0.780906 | 0.754132  | 1.000000  | 1.000      |
| 228 | GOBP-RAS-PROTEIN-SIGNAL-TRANSDUCTION              | GO-0007265    | 5    | 0.354766 | 0.778564 | 0.719123  | 1.000000  | 1.000      |
| 229 | GOBP-MAPK-CASCADE                                 | GO-0000165    | 18   | 0.237574 | 0.778521 | 0.791011  | 1.000000  | 1.000      |
| 230 | GOBP-POSITIVE-REGULATION-OF-GROWTH                | GO-00045927   | 9    | 0.296827 | 0.777671 | 0.740000  | 1.000000  | 1.000      |
| 231 | GOBP-IMPORT-INTO-CELL                             | GO-00098657   | 6    | 0.347569 | 0.777326 | 0.753275  | 1.000000  | 1.000      |
| 232 | GOBP-GENERATION-OF-PRECURSOR-METABOLITES-AND-E... | GO-0006091    | 5    | 0.358021 | 0.773973 | 0.758621  | 1.000000  | 1.000      |
| 233 | GOBP-REGULATION-OF-MUSCLE-ADAPTATION              | GO-00043502   | 5    | 0.355997 | 0.770206 | 0.752083  | 1.000000  | 1.000      |
| 234 | GOBP-NEGATIVE-REGULATION-OF-RESPONSE-TO-EXTERN... | GO-0032102    | 5    | 0.357464 | 0.768025 | 0.752119  | 1.000000  | 1.000      |
| 235 | GOBP-CALCIUM-ION-TRANSPORT                        | GO-0000816    | 11   | 0.259740 | 0.767802 | 0.783158  | 1.000000  | 1.000      |
| 236 | GOBP-CELL-GROWTH                                  | GO-0016049    | 10   | 0.273934 | 0.764706 | 0.776824  | 1.000000  | 1.000      |
| 237 | GOBP-TELECEPHALON-DEVELOPMENT                     | GO-0021537    | 6    | 0.329295 | 0.763871 | 0.776000  | 1.000000  | 1.000      |
| 238 | REACTOME-MAPK-FAMILY-SIGNALING-CASCADES           | R-RNO-5683057 | 12   | 0.259837 | 0.760389 | 0.804989  | 1.000000  | 1.000      |
| 239 | GOBP-REGULATION-OF-VASCULAR-ASSOCIATED-SMOOTH...  | GO-1904705    | 5    | 0.360374 | 0.760343 | 0.742739  | 1.000000  | 1.000      |
| 240 | REACTOME-POST-TRANSLATIONAL-PROTEIN-MODIFICATION  | R-RNO-597592  | 7    | 0.305997 | 0.757408 | 0.772727  | 1.000000  | 1.000      |
| 241 | GOBP-EMBRYO-DEVELOPMENT-ENDING-IN-BIRTH-OR-EGG... | GO-0009792    | 9    | 0.282313 | 0.751503 | 0.780702  | 1.000000  | 1.000      |
| 242 | GOBP-SMOOTH-MUSCLE-CELL-PROLIFERATION             | GO-00048659   | 6    | 0.322037 | 0.749119 | 0.790948  | 1.000000  | 1.000      |
| 243 | GOBP-CELL-MORPHOGENESIS-INVOLVED-IN-DIFFERENTI... | GO-0000904    | 21   | 0.215358 | 0.748977 | 0.803097  | 1.000000  | 1.000      |
| 244 | GOBP-CYTOSOLIC-CALCIUM-ION-TRANSPORT              | GO-00060401   | 7    | 0.310150 | 0.745409 | 0.761388  | 1.000000  | 1.000      |
| 245 | GOBP-ACTIVATION-OF-IMMUNE-RESPONSE                | GO-0002253    | 5    | 0.343390 | 0.744703 | 0.766004  | 1.000000  | 1.000      |
| 246 | GOBP-CALCIUM-ION-TRANSPORT-INTO-CYTOSOL           | GO-00060402   | 7    | 0.310150 | 0.744586 | 0.773389  | 1.000000  | 1.000      |
| 247 | GOBP-METAL-ION-TRANSPORT                          | GO-00030001   | 11   | 0.259740 | 0.740979 | 0.781116  | 1.000000  | 1.000      |
| 248 | GOBP-MUSCLE-ADAPTATION                            | GO-00043500   | 5    | 0.355997 | 0.740367 | 0.808791  | 1.000000  | 1.000      |
| 249 | GOBP-CALCIUM-ION-TRANSMEMBRANE-TRANSPORT          | GO-00070588   | 7    | 0.310150 | 0.739938 | 0.780172  | 1.000000  | 1.000      |
| 250 | GOBP-REGULATION-OF-IMMUNE-RESPONSE                | GO-00050776   | 12   | 0.249068 | 0.738205 | 0.820000  | 1.000000  | 1.000      |
| 251 | GOBP-PURINE-CONTAINING-COMPOUND-METABOLIC-PROCESS | GO-00072521   | 5    | 0.349788 | 0.737375 | 0.792123  | 1.000000  | 1.000      |
| 252 | GOBP-CARBOHYDRATE-METABOLIC-PROCESS               | GO-00059575   | 9    | 0.274287 | 0.735193 | 0.812095  | 1.000000  | 1.000      |
| 253 | REACTOME-TRANSCRIPTIONAL-REGULATION-BY_TP53       | R-RNO-3700989 | 6    | 0.319635 | 0.734475 | 0.797040  | 1.000000  | 1.000      |
| 254 | GOBP-STRIPATED-MUSCLE-CELL-DIFFERENTIATION        | GO-00051146   | 9    | 0.276853 | 0.734353 | 0.803738  | 1.000000  | 1.000      |
| 255 | GOBP-CELL-MORPHOGENESIS-INVOLVED-IN-NEURON-DIF... | GO-00048667   | 21   | 0.215358 | 0.734223 | 0.849462  | 1.000000  | 1.000      |



Continuation of Table S17

| NAME | ID                                                | SIZE | ES        | NES      | NOM.p.val | FDR.q.val | FWER.p.val |
|------|---------------------------------------------------|------|-----------|----------|-----------|-----------|------------|
| 256  | GOBP-LONG-TERM-SYNAPTIC-POTENTIATION              | 12   | 0.247401  | 0.731094 | 0.805621  | 1.000000  | 1.000      |
| 257  | GOBP-RESPONSE-TO-UV                               | 5    | 0.337143  | 0.725460 | 0.792812  | 1.000000  | 1.000      |
| 258  | GOBP-NEGATIVE-REGULATION-OF-PROTEIN-CATABOLIC...  | 5    | 0.337883  | 0.725332 | 0.808102  | 1.000000  | 1.000      |
| 259  | GOBP-POSITIVE-REGULATION-OF-PROTEIN-SERINE-THR... | 9    | 0.272946  | 0.722368 | 0.813901  | 1.000000  | 1.000      |
| 260  | GOBP-REGULATION-OF-NEURON-PROJECTION-DEVELOPMENT  | 16   | 0.223822  | 0.722330 | 0.827354  | 1.000000  | 1.000      |
| 261  | GOBP-EPITHELIAL-CELL-DIFFERENTIATION              | 7    | 0.300703  | 0.719321 | 0.794372  | 1.000000  | 1.000      |
| 262  | GOBP-PEPTIDE-SECRETION                            | 9    | 0.268923  | 0.718667 | 0.823529  | 1.000000  | 1.000      |
| 263  | GOBP-BIOLOGICAL-ADHESION                          | 19   | 0.211763  | 0.715531 | 0.853881  | 1.000000  | 1.000      |
| 264  | GOBP-PERIPHERAL-NERVOUS-SYSTEM-DEVELOPMENT        | 9    | 0.265823  | 0.712362 | 0.815287  | 1.000000  | 1.000      |
| 265  | GOBP-SMALL-MOLECULE-METABOLIC-PROCESS             | 15   | 0.225565  | 0.710981 | 0.852495  | 1.000000  | 1.000      |
| 266  | GOBP-POSITIVE-REGULATION-OF-NEURON-DEATH          | 5    | 0.326391  | 0.708261 | 0.819302  | 1.000000  | 1.000      |
| 267  | GOBP-MORPHOGENESIS-OF-AN-EPITHELIUM               | 6    | 0.296444  | 0.703586 | 0.804671  | 1.000000  | 1.000      |
| 268  | GOBP-PROTEIN-LOCALIZATION-TO-MEMBRANE             | 14   | 0.223389  | 0.701269 | 0.855011  | 1.000000  | 1.000      |
| 269  | GOBP-CELL-JUNCTION-ASSEMBLY                       | 8    | 0.268824  | 0.700649 | 0.843096  | 1.000000  | 1.000      |
| 270  | GOBP-REGULATION-OF-PROTEIN-SERINE-THREONINE-KI... | 12   | 0.241542  | 0.700541 | 0.866667  | 1.000000  | 1.000      |
| 271  | GOBP-SECOND-MESSENGER-MEDIATED-SIGNALING          | 16   | 0.217178  | 0.697857 | 0.874419  | 1.000000  | 1.000      |
| 272  | GOBP-SYNAPTIC-SIGNALING                           | 47   | 0.177273  | 0.696971 | 0.919668  | 1.000000  | 1.000      |
| 273  | REACTOME-MAPK-TARGETS-NUCLEAR-EVENTS-MEDIATED...  | 5    | 0.320955  | 0.695698 | 0.859756  | 1.000000  | 1.000      |
| 274  | REACTOME-TRANSCRIPTIONAL-REGULATION-OF-WHITE-A... | 6    | 0.298753  | 0.694437 | 0.852174  | 1.000000  | 1.000      |
| 275  | GOBP-MONOCARBOXYLIC-ACID-METABOLIC-PROCESS        | 6    | 0.301281  | 0.693398 | 0.853002  | 1.000000  | 1.000      |
| 276  | GOBP-NEGATIVE-REGULATION-OF-MOLECULAR-FUNCTION    | 24   | 0.194352  | 0.693343 | 0.891473  | 1.000000  | 1.000      |
| 277  | GOBP-CELL-PART-MORPHOGENESIS                      | 24   | 0.192448  | 0.690071 | 0.895981  | 1.000000  | 1.000      |
| 278  | GOBP-MEMORY                                       | 13   | 0.233218  | 0.686438 | 0.854031  | 1.000000  | 1.000      |
| 279  | GOBP-CELLULAR-COMPONENT-MORPHOGENESIS             | 24   | 0.192448  | 0.685958 | 0.907767  | 1.000000  | 1.000      |
| 280  | GOBP-PROTEIN-COMPLEX-OLIGOMERIZATION              | 6    | 0.291032  | 0.683836 | 0.860927  | 1.000000  | 1.000      |
| 281  | GOBP-REGULATION-OF-PEPTIDE-HORMONE-SECRETION      | 6    | 0.296185  | 0.679374 | 0.876380  | 1.000000  | 1.000      |
| 282  | GOBP-CELL-MORPHOGENESIS                           | 24   | 0.192448  | 0.678776 | 0.898058  | 1.000000  | 1.000      |
| 283  | REACTOME-SIGNALING-BY-NTRKS                       | 18   | 0.211639  | 0.678661 | 0.899772  | 1.000000  | 1.000      |
| 284  | GOBP-CELL-CELL-JUNCTION-ASSEMBLY                  | 5    | 0.308489  | 0.674775 | 0.847390  | 1.000000  | 1.000      |
| 285  | REACTOME-SIGNALING-BY-RECEPTOR-TYROSINE-KINASES   | 26   | 0.184079  | 0.672300 | 0.923645  | 1.000000  | 1.000      |
| 286  | REACTOME-NEUROTRANSMITTER-RECEPTORS-AND-POSTSY... | 22   | 0.190123  | 0.664551 | 0.923991  | 1.000000  | 1.000      |
| 287  | GOBP-NEGATIVE-REGULATION-OF-CELLULAR-COMPONENT... | 11   | 0.233055  | 0.663433 | 0.899533  | 1.000000  | 1.000      |
| 288  | GOBP-REGULATION-OF-DNA-BINDING-TRANSCRIPTION-F... | 16   | 0.211128  | 0.662605 | 0.901149  | 1.000000  | 1.000      |
| 289  | GOBP-REGULATION-OF-CIRCADIAN-RHYTHM               | 7    | 0.280875  | 0.662429 | 0.874715  | 1.000000  | 1.000      |
| 290  | GOBP-CELL-CELL-JUNCTION-ORGANIZATION              | 6    | 0.285936  | 0.657428 | 0.875789  | 1.000000  | 1.000      |
| 291  | GOBP-REGULATION-OF-MAPK-CASCADE                   | 13   | 0.220571  | 0.656707 | 0.897092  | 0.999632  | 1.000      |
| 292  | GOBP-ADENYLATE-CYCLASE-INHIBITING-G-PROTEIN-CO... | 9    | 0.242444  | 0.649845 | 0.903930  | 1.000000  | 1.000      |
| 293  | GOBP-FC-EPSILON-RECEPTOR-SIGNALING-PATHWAY        | 7    | 0.0038095 | 0.648375 | 0.907757  | 1.000000  | 1.000      |
| 294  | REACTOME-INTERFERON-SIGNALING                     | 6    | 0.286098  | 0.644584 | 0.899782  | 1.000000  | 1.000      |
| 295  | GOBP-PROTEIN-LOCALIZATION-TO-CELL-JUNCTION        | 6    | 0.280488  | 0.639035 | 0.900212  | 1.000000  | 1.000      |
| 296  | REACTOME-ADAPTIVE-IMMUNE-SYSTEM                   | 9    | 0.246677  | 0.637809 | 0.902335  | 1.000000  | 1.000      |
| 297  | GOBP-IMMUNE-RESPONSE-REGULATING-SIGNALING-PATHWAY | 8    | 0.244512  | 0.630564 | 0.924211  | 1.000000  | 1.000      |
| 298  | REACTOME-FC-EPSILON-RECEPTOR-FCER1-SIGNALING      | 7    | 0.260042  | 0.625683 | 0.920705  | 1.000000  | 1.000      |

Continuation of Table S17

| NAME | ID                                                | SIZE | ES        | NES       | NOM.p.val | FDR.q.val | FWER.p.val |
|------|---------------------------------------------------|------|-----------|-----------|-----------|-----------|------------|
| 299  | GOBP.FC.RECEPTOR.SIGNALING.PATHWAY                | 8    | 0.244512  | 0.623948  | 0.920705  | 1.000000  | 1.000      |
| 300  | GOBP.PROTEIN.LOCALIZATION.TO.PLASMA.MEMBRANE      | 7    | 0.245205  | 0.621636  | 0.935982  | 1.000000  | 1.000      |
| 301  | GOBP.PROTEIN.LOCALIZATION.TO.POSTSYNAPSE          | 5    | 0.277108  | 0.612834  | 0.927536  | 1.000000  | 1.000      |
| 302  | GOBP.INSULIN.SECRETION                            | 7    | 0.247778  | 0.611511  | 0.920091  | 1.000000  | 1.000      |
| 303  | GOBP.PEPTIDE.HORMONE.SECRETION                    | 7    | 0.247778  | 0.608272  | 0.942350  | 1.000000  | 1.000      |
| 304  | GOBP.EXCITATORY.CHEMICAL.SYNAPTIC.TRANSMISSION    | 5    | 0.277108  | 0.595552  | 0.934599  | 1.000000  | 1.000      |
| 305  | REACTOME.DAG.AND.IP3.SIGNALING                    | 8    | 0.234189  | 0.598181  | 0.946467  | 1.000000  | 1.000      |
| 306  | GOBP.PROTEIN.LOCALIZATION.TO.SYNAPSE              | 5    | 0.277108  | 0.594815  | 0.926882  | 1.000000  | 1.000      |
| 307  | GOBP.REGULATION.OF.LIPID.LOCALIZATION             | 5    | 0.266685  | 0.568277  | 0.941685  | 1.000000  | 1.000      |
| 308  | GOBP.POSITIVE.REGULATION.OF.SIGNALING             | 34   | 0.145338  | 0.563750  | 0.988263  | 1.000000  | 1.000      |
| 309  | GOBP.REGULATION.OF.PROTEIN.BINDING                | 7    | 0.229171  | 0.562036  | 0.956236  | 1.000000  | 1.000      |
| 310  | GOBP.NEGATIVE.REGULATION.OF.ANION.TRANSPORT       | 8    | 0.225000  | 0.557854  | 0.966316  | 1.000000  | 1.000      |
| 311  | GOBP.NEGATIVE.REGULATION.OF.SYNAPTIC.TRANSMISSION | 6    | 0.231707  | 0.548428  | 0.981777  | 1.000000  | 1.000      |
| 312  | GOBP.COGNITION                                    | 28   | 0.146929  | 0.545219  | 0.990453  | 1.000000  | 1.000      |
| 313  | REACTOME.LEISHMANIA.INFECTION                     | 10   | 0.195544  | 0.537774  | 0.974359  | 1.000000  | 1.000      |
| 314  | GOBP.NEGATIVE.REGULATION.OF.BINDING               | 6    | 0.227526  | 0.529328  | 0.986900  | 1.000000  | 1.000      |
| 315  | GOBP.DIVALENT.INORGANIC.CATION.HOMEOSTASIS        | 13   | 0.175471  | 0.525989  | 0.974194  | 1.000000  | 1.000      |
| 316  | GOBP.REGULATION.OF.CYTOSOLIC.CALCIUM.ION.CONCE... | 13   | 0.175471  | 0.524212  | 0.982456  | 1.000000  | 1.000      |
| 317  | GOBP.RESPONSE.TO.MECHANICAL.STIMULUS              | 6    | 0.219512  | 0.500502  | 0.993377  | 1.000000  | 1.000      |
| 318  | REACTOME.PROTEIN.PROTEIN.INTERACTIONS.AT.SYNAPSES | 12   | 0.167516  | 0.494912  | 0.988426  | 1.000000  | 1.000      |
| 319  | GOBP.MUSCLE.CELL.DIFFERENTIATION                  | 10   | 0.179487  | 0.487547  | 0.989107  | 1.000000  | 1.000      |
| 320  | GOBP.NEGATIVE.REGULATION.OF.KINASE.ACTIVITY       | 5    | 0.223847  | 0.481315  | 0.991091  | 1.000000  | 1.000      |
| 321  | GOBP.METAL.ION.HOMEOSTASIS                        | 14   | 0.157335  | 0.478386  | 0.993228  | 1.000000  | 1.000      |
| 322  | GOBP.NEGATIVE.REGULATION.OF.TRANSFERASE.ACTIVITY  | 5    | 0.223847  | 0.465631  | 0.993711  | 1.000000  | 1.000      |
| 323  | GOBP.ORGANIC.ACID.METABOLIC.PROCESS               | 7    | 0.187750  | 0.454007  | 0.995283  | 1.000000  | 1.000      |
| 324  | GOBP.REGULATION.OF.NEURON.DIFFERENTIATION         | 5    | 0.204819  | 0.433908  | 1.000000  | 1.000000  | 1.000      |
| 325  | GOBP.PROTEIN.LOCALIZATION.TO.CELL.PERIPHERY       | 12   | 0.139492  | 0.411755  | 1.000000  | 0.999098  | 1.000      |
| 326  | GOBP.MALE.GAMETE.GENERATION                       | 5    | -0.240964 | -0.510617 | 0.992095  | 0.984988  | 1.000      |
| 327  | GOBP.NEURON.DEVELOPMENT                           | 33   | -0.145683 | -0.515500 | 0.986087  | 0.986139  | 1.000      |
| 328  | GOBP.CELL.PROJECTION.ORGANIZATION                 | 34   | -0.143257 | -0.519058 | 0.987784  | 0.987463  | 1.000      |
| 329  | GOBP.POLYSACCHARIDE.METABOLIC.PROCESS             | 5    | -0.256169 | -0.542382 | 0.969981  | 0.981309  | 1.000      |
| 330  | HALLMARK.HYPOXIA                                  | 5    | -0.257328 | -0.545221 | 0.974903  | 0.982559  | 1.000      |
| 331  | GOBP.RESPONSE.TO.LIGHT.STIMULUS                   | 11   | -0.196439 | -0.545893 | 0.970480  | 0.984803  | 1.000      |
| 332  | GOBP.MULTICELLULAR.ORGANISM.PROCESS               | 8    | -0.221115 | -0.548046 | 0.967308  | 0.986452  | 1.000      |
| 333  | GOBP.REGULATION.OF.SYSTEM.PROCESS                 | 18   | -0.174105 | -0.548478 | 0.962393  | 0.988816  | 1.000      |
| 334  | GOBP.REGULATION.OF.AXONOGENESIS                   | 7    | -0.227215 | -0.550781 | 0.965116  | 0.990367  | 1.000      |
| 335  | GOBP.ENDOCYTOSIS                                  | 8    | -0.223243 | -0.552687 | 0.968045  | 0.992057  | 1.000      |
| 336  | HALLMARK.UV.RESPONSE.UP                           | 5    | -0.267794 | -0.562542 | 0.960073  | 0.988595  | 1.000      |
| 337  | REACTOME.NEUREXINS.AND.NEURLIGINS                 | 9    | -0.219053 | -0.567618 | 0.954710  | 0.989538  | 1.000      |
| 338  | GOBP.EPHRIN.RECEPTOR.SIGNALING.PATHWAY            | 5    | -0.265060 | -0.570726 | 0.955473  | 0.990339  | 1.000      |
| 339  | GOBP.NUCLEOBASE.CONTAINING.SMALL.MOLECULE.META... | 6    | -0.254952 | -0.573318 | 0.966797  | 0.991559  | 1.000      |
| 340  | GOBP.RESPONSE.TO.METAL.ION                        | 15   | -0.191781 | -0.574399 | 0.939068  | 0.993505  | 1.000      |
| 341  | GOBP.GAMETE.GENERATION                            | 9    | -0.217731 | -0.575077 | 0.939068  | 0.995754  | 1.000      |

Continuation of Table S17

| NAME | ID                                                | SIZE | ES        | NES       | NOM.p.val | FDR.q.val | FWER.p.val |
|------|---------------------------------------------------|------|-----------|-----------|-----------|-----------|------------|
| 342  | GOBP-REGULATION-OF-CARBOHYDRATE-BIOSYNTHETIC.P... | 5    | -0.275296 | -0.575165 | 0.948718  | 0.998348  | 1.000      |
| 343  | GOBP-HORMONE-TRANSPORT                            | 9    | -0.224620 | -0.578500 | 0.957295  | 0.999134  | 1.000      |
| 344  | GOBP-ADENYLATE-CYCLASE-MODULATING-G-PROTEIN.CO... | 11   | -0.214345 | -0.581683 | 0.945355  | 0.999870  | 1.000      |
| 345  | GOBP-POSITIVE-REGULATION-OF-PROTEOLYSIS           | 8    | -0.234908 | -0.587582 | 0.940972  | 0.998535  | 1.000      |
| 346  | GOBP-CARBOHYDRATE-BIOSYNTHETIC-PROCESS            | 5    | -0.275296 | -0.589868 | 0.960967  | 0.999773  | 1.000      |
| 347  | GOBP-REGULATION-OF-CARBOHYDRATE-METABOLIC-PROCESS | 5    | -0.275296 | -0.590619 | 0.945055  | 1.000000  | 1.000      |
| 348  | GOBP-REGULATION-OF-PROTEIN-LOCALIZATION.TO.MEM... | 7    | -0.246606 | -0.604782 | 0.927619  | 0.995013  | 1.000      |
| 349  | GOBP-CELLULAR-RESPONSE.TO.INORGANIC-SUBSTANCE     | 11   | -0.220897 | -0.604914 | 0.940270  | 0.997609  | 1.000      |
| 350  | REACTOME-TRAFFICKING-OF-AMPA-RECEPTORS            | 11   | -0.222052 | -0.607773 | 0.927239  | 0.998209  | 1.000      |
| 351  | GOBP-APOPTOTIC-MITOCHONDRIAL-CHANGES              | 6    | -0.272970 | -0.609014 | 0.942272  | 0.999959  | 1.000      |
| 352  | GOBP-CELL-CELL-SIGNALING                          | 56   | -0.167222 | -0.615451 | 0.950931  | 0.997605  | 1.000      |
| 353  | GOBP-ENDOCRINE-SYSTEM-DEVELOPMENT                 | 6    | -0.273646 | -0.615759 | 0.932961  | 1.000000  | 1.000      |
| 354  | REACTOME-EPHLEPHRIN-SIGNALING                     | 6    | -0.268293 | -0.616092 | 0.939394  | 1.000000  | 1.000      |
| 355  | GOBP-NEGATIVE-REGULATION-OF-LIPID-METABOLIC.PR... | 5    | -0.291155 | -0.620533 | 0.907197  | 1.000000  | 1.000      |
| 356  | REACTOME-INTERLEUKIN-17-SIGNALING                 | 6    | -0.275947 | -0.623455 | 0.913556  | 1.000000  | 1.000      |
| 357  | GOBP-CELL-CELL-ADHESION                           | 14   | -0.210742 | -0.629030 | 0.931699  | 0.999636  | 1.000      |
| 358  | GOBP-POSITIVE-REGULATION-OF-CYSTEINE-TYPE-ENDO... | 7    | -0.266783 | -0.630817 | 0.918330  | 1.000000  | 1.000      |
| 359  | GOBP-G-PROTEIN-COUPLED-RECEPTOR-SIGNALING-PATHWAY | 18   | -0.200818 | -0.638090 | 0.924028  | 0.997283  | 1.000      |
| 360  | GOBP-REGULATION-OF-CELL-CYCLE-PROCESS             | 5    | -0.303711 | -0.638338 | 0.936210  | 0.999801  | 1.000      |
| 361  | GOBP-REGULATION-OF-ANATOMICAL-STRUCTURE-SIZE      | 10   | -0.244465 | -0.640823 | 0.897727  | 1.000000  | 1.000      |
| 362  | GOBP-POSITIVE-REGULATION-OF-PEPTIDASE-ACTIVITY    | 7    | -0.266783 | -0.644383 | 0.902574  | 0.999815  | 1.000      |
| 363  | GOBP-MUSCLE-STRUCTURE-DEVELOPMENT                 | 16   | -0.216015 | -0.648015 | 0.911032  | 0.999087  | 1.000      |
| 364  | GOBP-NEGATIVE-REGULATION-OF-TRANSMEMBRANE-TRAN... | 6    | -0.285851 | -0.649824 | 0.903808  | 1.000000  | 1.000      |
| 365  | GOBP-CHEMICAL-HOMEOSTASIS                         | 23   | -0.198177 | -0.652738 | 0.922414  | 0.999773  | 1.000      |
| 366  | GOBP-RESPONSE.TO.DRUG                             | 11   | -0.233766 | -0.652795 | 0.906643  | 1.000000  | 1.000      |
| 367  | GOBP-RESPONSE.TO.INORGANIC-SUBSTANCE              | 19   | -0.202899 | -0.653263 | 0.908612  | 1.000000  | 1.000      |
| 368  | REACTOME-TRANSMISSION-ACROSS-CHEMICAL-SYNAPSES    | 23   | -0.193982 | -0.653524 | 0.922242  | 1.000000  | 1.000      |
| 369  | GOBP-CELL-CELL-SIGNALING-BY.WNT                   | 7    | -0.271004 | -0.656767 | 0.904936  | 1.000000  | 1.000      |
| 370  | GOBP-REGULATION-OF-HORMONE-SECRETION              | 8    | -0.264162 | -0.658798 | 0.893657  | 1.000000  | 1.000      |
| 371  | GOBP-PROTEIN-DEPHOSPHORYLATION                    | 7    | -0.279892 | -0.665068 | 0.878277  | 1.000000  | 1.000      |
| 372  | GOBP-BEHAVIOR                                     | 32   | -0.188070 | -0.667340 | 0.911519  | 1.000000  | 1.000      |
| 373  | REACTOME-DISEASES-OF-SIGNAL-TRANSDUCTION-BY-GR... | 12   | -0.241488 | -0.669008 | 0.882662  | 1.000000  | 1.000      |
| 374  | GOBP-DEPHOSPHORYLATION                            | 7    | -0.279892 | -0.678107 | 0.869403  | 0.997637  | 1.000      |
| 375  | GOBP-POSITIVE-REGULATION-OF-DEFENSE-RESPONSE      | 5    | -0.323706 | -0.679219 | 0.890411  | 0.999183  | 1.000      |
| 376  | GOBP-REGULATION-OF-TRANS-SYNAPTIC-SIGNALING       | 40   | -0.187856 | -0.680931 | 0.925203  | 0.999987  | 1.000      |
| 377  | GOBP-NEGATIVE-REGULATION-OF-INTRACELLULAR-SIGN... | 7    | -0.283354 | -0.684168 | 0.856884  | 0.999094  | 1.000      |
| 378  | GOBP-REGULATION-OF-FAT-CELL-DIFFERENTIATION       | 6    | -0.307407 | -0.694871 | 0.860735  | 0.988479  | 1.000      |
| 379  | REACTOME-CELLULAR-RESPONSES-TO-EXTERNAL-STIMULI   | 12   | -0.244948 | -0.699014 | 0.864865  | 0.985939  | 1.000      |
| 380  | GOBP-CELLULAR-CARBOHYDRATE-METABOLIC-PROCESS      | 5    | -0.330969 | -0.699395 | 0.852612  | 0.985299  | 1.000      |
| 381  | REACTOME-INTEGRATION-OF-ENERGY-METABOLISM         | 5    | -0.328368 | -0.704236 | 0.835644  | 0.984873  | 1.000      |
| 382  | GOBP-CELLULAR-RESPONSE-TO-EXTRACELLULAR-STIMULUS  | 8    | -0.285972 | -0.704882 | 0.850000  | 0.986901  | 1.000      |
| 383  | GOBP-GROWTH                                       | 14   | -0.245664 | -0.708034 | 0.840951  | 0.985658  | 1.000      |
| 384  | GOBP-POSITIVE-REGULATION-OF-AXONOGENESIS          | 5    | -0.335168 | -0.712317 | 0.825832  | 0.982795  | 1.000      |

Continuation of Table S17

|     | NAME                                               | ID            | SIZE | ES        | NES       | NOM.p.val | FDR.q.val | FWER.p.val |
|-----|----------------------------------------------------|---------------|------|-----------|-----------|-----------|-----------|------------|
| 385 | GOBP-ORGAN_GROWTH                                  | GO-0035265    | 5    | -0.335429 | -0.715125 | 0.859073  | 0.981899  | 1.000      |
| 386 | GOBP-CELLULAR-MACROMOLECULE-LOCALIZATION           | GO-0070727    | 21   | -0.224746 | -0.720497 | 0.846939  | 0.977051  | 1.000      |
| 387 | GOBP-NEGATIVE-REGULATION-OF-NERVOUS-SYSTEM.DEV...  | GO-0051961    | 5    | -0.329935 | -0.721797 | 0.834601  | 0.978258  | 1.000      |
| 388 | GOBP-NEUROTROPHIN-TRK-RECEPTOR-SIGNALING-PATHWAY   | GO-0048011    | 6    | -0.319117 | -0.728551 | 0.843212  | 0.971647  | 1.000      |
| 389 | GOBP-NEUROTROPHIN-SIGNALING-PATHWAY                | GO-0038179    | 6    | -0.319117 | -0.728908 | 0.833984  | 0.974096  | 1.000      |
| 390 | GOBP-REGULATION-OF-CELL-ADHESION                   | GO-0030155    | 13   | -0.249013 | -0.731353 | 0.829907  | 0.973608  | 1.000      |
| 391 | REACTOME-CIRCADIAN-CLOCK                           | R-HSA-400253  | 5    | -0.337444 | -0.736192 | 0.796610  | 0.969516  | 1.000      |
| 392 | GOBP-REGULATION-OF-ORGAN-GROWTH                    | GO-0046620    | 5    | -0.335429 | -0.736608 | 0.805714  | 0.971860  | 1.000      |
| 393 | GOBP-REGULATION-OF-PROTEIN-PHOSPHORYLATION         | GO-0001932    | 26   | -0.217357 | -0.739541 | 0.819700  | 0.970385  | 1.000      |
| 394 | GOBP-REGULATION-OF-LEUKOCYTE-DIFFERENTIATION       | GO-1902105    | 9    | -0.286388 | -0.741212 | 0.789773  | 0.970786  | 1.000      |
| 395 | GOBP-NEGATIVE-REGULATION-OF-SIGNALING              | GO-0023057    | 21   | -0.228914 | -0.741306 | 0.808970  | 0.973633  | 1.000      |
| 396 | GOBP-ACTIN-FILAMENT-BASED-PROCESS                  | GO-0030029    | 7    | -0.307528 | -0.743940 | 0.790566  | 0.972400  | 1.000      |
| 397 | GOBP-POSITIVE-REGULATION-OF-CELL-DEATH             | GO-0010942    | 19   | -0.237814 | -0.744352 | 0.799648  | 0.974813  | 1.000      |
| 398 | GOBP-NEUROGENESIS                                  | GO-0022008    | 40   | -0.201593 | -0.745815 | 0.848185  | 0.975510  | 1.000      |
| 399 | GOBP-TUBE-MORPHOGENESIS                            | GO-0035239    | 15   | -0.250059 | -0.749656 | 0.781818  | 0.972355  | 1.000      |
| 400 | GOBP-NERVOUS-SYSTEM-PROCESS                        | GO-0050877    | 38   | -0.204811 | -0.752788 | 0.831034  | 0.970425  | 1.000      |
| 401 | GOBP-CELLULAR-ION-HOMEOSTASIS                      | GO-0006873    | 14   | -0.255505 | -0.753119 | 0.809074  | 0.972966  | 1.000      |
| 402 | REACTOME-DEATH-RECEPTOR-SIGNALING                  | R-RNO-73887   | 5    | -0.350561 | -0.753531 | 0.774436  | 0.975423  | 1.000      |
| 403 | GOBP-CELLULAR-RESPONSE-TO-EXTERNAL-STIMULUS        | GO-0071496    | 10   | -0.284928 | -0.755885 | 0.766727  | 0.974839  | 1.000      |
| 404 | GOBP-MITOTIC-CELL-CYCLE                            | GO-0000278    | 5    | -0.283106 | -0.757317 | 0.779130  | 0.975492  | 1.000      |
| 405 | GOBP-REGULATION-OF-WNT-SIGNALING-PATHWAY           | GO-0030111    | 10   | -0.355168 | -0.757418 | 0.756007  | 0.978465  | 1.000      |
| 406 | GOBP-LOCOMOTION                                    | GO-0040011    | 31   | -0.214758 | -0.758474 | 0.810858  | 0.979906  | 1.000      |
| 407 | GOBP-POSITIVE-REGULATION-OF-CELL-DIFFERENTIATION   | GO-0045597    | 27   | -0.218191 | -0.758597 | 0.812825  | 0.982837  | 1.000      |
| 408 | GOBP-REGULATION-OF-GROWTH                          | GO-0040008    | 13   | -0.263334 | -0.758766 | 0.788194  | 0.985694  | 1.000      |
| 409 | GOBP-RESPONSE-TO-ALCOHOL                           | GO-0097305    | 11   | -0.272727 | -0.759184 | 0.763251  | 0.988147  | 1.000      |
| 410 | GOBP-CYTOKINE-MEDIATED-SIGNALING-PATHWAY           | GO-0019221    | 16   | -0.250105 | -0.766793 | 0.769674  | 0.978708  | 1.000      |
| 411 | GOBP-GLUTAMATE-RECEPTOR-SIGNALING-PATHWAY          | GO-0007215    | 17   | -0.249207 | -0.766885 | 0.801038  | 0.981711  | 1.000      |
| 412 | GOBP-NEGATIVE-REGULATION-OF-SIGNALING-PATHWAY      | GO-2000117    | 5    | -0.353347 | -0.767754 | 0.760536  | 0.983480  | 1.000      |
| 413 | GOBP-TISSUE-MORPHOGENESIS                          | GO-0048729    | 7    | -0.316556 | -0.768656 | 0.802607  | 0.985115  | 1.000      |
| 414 | GOBP-ORGANONITROGEN-COMPOUND-BIOSYNTHETIC-PROCESS  | GO-1901566    | 13   | -0.270174 | -0.768825 | 0.779751  | 0.988051  | 1.000      |
| 415 | GOBP-CELL-CYCLE-PROCESS                            | GO-0022402    | 11   | -0.285995 | -0.769204 | 0.756708  | 0.990583  | 1.000      |
| 416 | REACTOME-ESTROGEN-DEPENDENT-NUCLEAR-EVENTS.DOW...  | R-RNO-9634638 | 5    | -0.367007 | -0.769814 | 0.754128  | 0.992726  | 1.000      |
| 417 | GOBP-REGULATION-OF-SYNAPTIC-PLASTICITY             | GO-0048167    | 21   | -0.235194 | -0.772035 | 0.754685  | 0.992286  | 1.000      |
| 418 | GOBP-REGULATION-OF-MYELOID-LEUKOCYTE-DIFFERENT...  | GO-0002761    | 8    | -0.302660 | -0.775109 | 0.759013  | 0.990186  | 1.000      |
| 419 | GOBP-RESPONSE-TO-RADIATION                         | GO-0009314    | 13   | -0.272304 | -0.777141 | 0.740143  | 0.989798  | 1.000      |
| 420 | GOBP-REGULATION-OF-CYTOSKELETON-ORGANIZATION       | GO-0051493    | 5    | -0.366054 | -0.777897 | 0.749035  | 0.991889  | 1.000      |
| 421 | GOBP-REGULATION-OF-CYSTEINE-TYPE-ENDOPEPTIDASE...  | GO-2000116    | 9    | -0.301265 | -0.781742 | 0.757634  | 0.988311  | 1.000      |
| 422 | GOBP-REGULATION-OF-MUSCLE-SYSTEM-PROCESS           | GO-0090257    | 8    | -0.316917 | -0.787403 | 0.714795  | 0.981270  | 1.000      |
| 423 | GOBP-NERVE-DEVELOPMENT                             | GO-0021675    | 9    | -0.305370 | -0.791670 | 0.724907  | 0.976929  | 1.000      |
| 424 | GOBP-BLOOD-VESSEL-MORPHOGENESIS                    | GO-0048514    | 14   | -0.272567 | -0.792021 | 0.739895  | 0.979529  | 1.000      |
| 425 | GOBP-REGULATION-OF-PROTEIN-LOCALIZATION            | GO-0032880    | 18   | -0.251046 | -0.792461 | 0.732472  | 0.982133  | 1.000      |
| 426 | GOBP-RESPONSE-TO-STARVATION                        | GO-0042594    | 5    | -0.377560 | -0.794471 | 0.736842  | 0.981754  | 1.000      |
| 427 | GOBP-POSITIVE-REGULATION-OF-PRL-MI-RNA-TRANSCRI... | GO-1902895    | 7    | -0.344199 | -0.796278 | 0.705996  | 0.981868  | 1.000      |

Continuation of Table S17

|     | NAME                                              | ID            | SIZE | ES        | NES       | NOM.p.val | FDR.q.val | FWER.p.val |
|-----|---------------------------------------------------|---------------|------|-----------|-----------|-----------|-----------|------------|
| 428 | GOBP-TEMPERATURE.HOMEOSTASIS                      | GO-0001659    | 5    | -0.381414 | -0.797433 | 0.706204  | 0.983237  | 1.000      |
| 429 | GOBP-CENTRAL.NERVOUS.SYSTEM.DEVELOPMENT           | GO-0007417    | 26   | -0.235665 | -0.797927 | 0.746219  | 0.985702  | 1.000      |
| 430 | HALLMARK-KRAS.SIGNALING.UP                        | M5953         | 6    | -0.351981 | -0.799536 | 0.729679  | 0.986129  | 1.000      |
| 431 | GOBP-GLAND.DEVELOPMENT                            | GO-0048732    | 7    | -0.334184 | -0.805072 | 0.684615  | 0.979153  | 1.000      |
| 432 | GOBP-REGULATION.OF.PROTEOLYSIS                    | GO-0030162    | 12   | -0.283622 | -0.806262 | 0.740608  | 0.980184  | 1.000      |
| 433 | GOBP-RESPONSE.TO.CALCIUM.ION                      | GO-0051592    | 6    | -0.365854 | -0.806709 | 0.667300  | 0.982781  | 1.000      |
| 434 | GOBP-FAT.CELL.DIFFERENTIATION                     | GO-0045444    | 9    | -0.317881 | -0.810416 | 0.705882  | 0.979299  | 1.000      |
| 435 | GOBP-RESPONSE.TO.HEAT                             | GO-0009408    | 7    | -0.344344 | -0.810717 | 0.696798  | 0.982136  | 1.000      |
| 436 | GOBP-POSITIVE.REGULATION.OF.TRANSPORT             | GO-0051050    | 26   | -0.239038 | -0.811073 | 0.747826  | 0.984882  | 1.000      |
| 437 | GOBP-REGULATION.OF.CELL.DEATH                     | GO-0010941    | 34   | -0.226950 | -0.811999 | 0.752212  | 0.986512  | 1.000      |
| 438 | GOBP-NEGATIVE.REGULATION.OF.CELL.CYCLE            | GO-0045786    | 5    | -0.381268 | -0.819739 | 0.669246  | 0.975192  | 1.000      |
| 439 | GOBP-REGULATION.OF.CELLULAR.LOCALIZATION          | GO-0060341    | 17   | -0.266993 | -0.820239 | 0.719852  | 0.977604  | 1.000      |
| 440 | GOBP-NEGATIVE.REGULATION.OF.PHOSPHORYLATION       | GO-0042326    | 7    | -0.342878 | -0.821338 | 0.659615  | 0.978906  | 1.000      |
| 441 | GOBP-POSITIVE.REGULATION.OF.PROTEIN.MODIFICATI... | GO-0031401    | 23   | -0.251991 | -0.821441 | 0.746317  | 0.982211  | 1.000      |
| 442 | GOBP-POSITIVE.REGULATION.OF.PHOSPHORUS.METABOL... | GO-0010562    | 24   | -0.244858 | -0.821718 | 0.731922  | 0.985244  | 1.000      |
| 443 | GOBP-PRLMIRNA.TRANSCRIPTION.BY.RNA.POLYMERASE.II  | GO-0061614    | 7    | -0.344199 | -0.822491 | 0.661654  | 0.987379  | 1.000      |
| 444 | GOBP-AXON.DEVELOPMENT                             | GO-0061564    | 18   | -0.259866 | -0.822546 | 0.737030  | 0.990842  | 1.000      |
| 445 | GOBP-REGULATION.OF.MYELOID.CELL.DIFFERENTIATION   | GO-0045637    | 9    | -0.318119 | -0.826042 | 0.675373  | 0.987472  | 1.000      |
| 446 | GOBP-CELLULAR.RESPONSE.TO.STARVATION              | GO-0009267    | 5    | -0.377560 | -0.826344 | 0.670565  | 0.990525  | 1.000      |
| 447 | GOBP-NEGATIVE.REGULATION.OF.ION.TRANSPORT         | GO-0043271    | 11   | -0.298889 | -0.828319 | 0.703846  | 0.990259  | 1.000      |
| 448 | GOBP-NEURON.APOPTOTIC.PROCESS                     | GO-0051402    | 12   | -0.296602 | -0.829549 | 0.680851  | 0.991302  | 1.000      |
| 449 | GOBP-CELLULAR.RESPONSE.TO.KETONE                  | GO-1901655    | 5    | -0.393422 | -0.833599 | 0.656075  | 0.986883  | 1.000      |
| 450 | REACTOME.G.ALPHA.I.SIGNALING.EVENTS               | R-RNO-418594  | 18   | -0.266325 | -0.837792 | 0.696270  | 0.990121  | 1.000      |
| 451 | GOBP-REGULATION.OF.SMALL.MOLECULE.METABOLIC.PR... | GO-0062012    | 9    | -0.326279 | -0.834213 | 0.681481  | 0.993030  | 1.000      |
| 452 | REACTOME.NEURONAL.SYSTEM                          | R-RNO-112316  | 26   | -0.246910 | -0.834586 | 0.700717  | 0.996046  | 1.000      |
| 453 | GOBP-AMIDE.BIOSYNTHETIC.PROCESS                   | GO-0043604    | 7    | -0.359650 | -0.836378 | 0.651837  | 0.996060  | 1.000      |
| 454 | GOBP-POSITIVE.REGULATION.OF.EPITHELIAL.CELL.PR... | GO-0050679    | 7    | -0.351124 | -0.837435 | 0.657356  | 0.997702  | 1.000      |
| 455 | REACTOME.INNATE.IMMUNE.SYSTEM                     | R-RNO-168249  | 16   | -0.282102 | -0.839177 | 0.661202  | 0.997616  | 1.000      |
| 456 | GOBP-NEGATIVE.REGULATION.OF.TRANSCRIPTION.BY.R... | GO-0000122    | 10   | -0.323154 | -0.850224 | 0.677596  | 0.978910  | 1.000      |
| 457 | GOBP-REGULATION.OF.CELL.CYCLE                     | GO-0051726    | 13   | -0.295029 | -0.852917 | 0.648746  | 0.976855  | 1.000      |
| 458 | GOBP-POSITIVE.REGULATION.OF.PROTEIN.PHOSPHORYL... | GO-0001934    | 23   | -0.251991 | -0.852972 | 0.678261  | 0.980478  | 1.000      |
| 459 | GOBP-REGULATION.OF.PEPTIDE.TRANSPORT              | GO-0090087    | 10   | -0.321012 | -0.856704 | 0.625709  | 0.976337  | 1.000      |
| 460 | GOBP-REGULATION.OF.CELL.CELL-ADHESION             | GO-0022407    | 9    | -0.335140 | -0.862699 | 0.622430  | 0.967519  | 1.000      |
| 461 | GOBP-CELLULAR.HOMEOSTASIS                         | GO-0019725    | 18   | -0.268978 | -0.863256 | 0.642218  | 0.970059  | 1.000      |
| 462 | GOBP-REGULATION.OF.CELLULAR.PROTEIN.LOCALIZATION  | GO-1903827    | 12   | -0.303139 | -0.864231 | 0.631776  | 0.971709  | 1.000      |
| 463 | GOBP-PEPTIDE.BIOSYNTHETIC.PROCESS                 | GO-0043043    | 7    | -0.359650 | -0.866282 | 0.632114  | 0.971149  | 1.000      |
| 464 | REACTOME.SIGNALING.BY.NUCLEAR.RECEPTORS           | R-RNO-9006931 | 8    | -0.354072 | -0.869335 | 0.626894  | 0.968392  | 1.000      |
| 465 | GOBP-NEURON.MIGRATION                             | GO-0001764    | 5    | -0.410807 | -0.871054 | 0.614943  | 0.968471  | 1.000      |
| 466 | GOBP-CELLULAR.RESPONSE.TO.PEPTIDE.HORMONE.STIM... | GO-0071375    | 9    | -0.338317 | -0.871283 | 0.627737  | 0.971786  | 1.000      |
| 467 | GOBP-HEAD.DEVELOPMENT                             | GO-0060322    | 22   | -0.268655 | -0.872931 | 0.641667  | 0.971999  | 1.000      |
| 468 | GOBP-POSITIVE.REGULATION.OF.PROTEIN.METABOLIC...  | GO-0051247    | 28   | -0.250585 | -0.873654 | 0.650602  | 0.974098  | 1.000      |
| 469 | GOBP-RESPONSE.TO.NICOTINE                         | GO-0035094    | 7    | -0.365317 | -0.875416 | 0.629496  | 0.974039  | 1.000      |
| 470 | GOBP-PROTEIN.PHOSPHORYLATION                      | GO-0006468    | 34   | -0.248383 | -0.876064 | 0.666667  | 0.976588  | 1.000      |

Continuation of Table S17

| NAME                                                  | ID            | SIZE | ES        | NES       | NOM.p.val | FDR.q.val | FWER.p.val |
|-------------------------------------------------------|---------------|------|-----------|-----------|-----------|-----------|------------|
| 471 REACTOME_ESR-MEDIATED-SIGNALING                   | R-RNO-8939211 | 8    | -0.354072 | -0.870575 | 0.631485  | 0.979360  | 1.000      |
| 472 GOBP-NEGATIVE-REGULATION-OF-NEURON-APOPTOTIC.P... | GO-0043524    | 8    | -0.351938 | -0.877826 | 0.637383  | 0.980623  | 1.000      |
| 473 GOBP-EMBRYONIC-ORGAN-DEVELOPMENT                  | GO-0048568    | 7    | -0.365075 | -0.877952 | 0.618147  | 0.984399  | 1.000      |
| 474 GOBP-CYTOSKELETON-ORGANIZATION                    | GO-0007010    | 11   | -0.317989 | -0.878412 | 0.634409  | 0.987372  | 1.000      |
| 475 GOBP-RESPONSE-TO-KETONE                           | GO-1901670    | 7    | -0.370370 | -0.879927 | 0.605948  | 0.988111  | 1.000      |
| 476 GOBP-TRANSMEMBRANE-RECEPTOR-PROTEIN-TYROSINE.K... | GO-0007169    | 19   | -0.270578 | -0.880858 | 0.626736  | 0.990137  | 1.000      |
| 477 GOBP-REGULATION-OF-HYDROLASE-ACTIVITY             | GO-0051336    | 22   | -0.265347 | -0.881264 | 0.639860  | 0.993278  | 1.000      |
| 478 GOBP-MATERNAL-PROCESS-INVOLVED-IN-FEMALE-PREGN... | GO-0060135    | 5    | -0.408336 | -0.881512 | 0.608949  | 0.996902  | 1.000      |
| 479 GOBP-CELLULAR-RESPONSE-TO-ALCOHOL                 | GO-0097306    | 5    | -0.412911 | -0.881996 | 0.605948  | 1.000000  | 1.000      |
| 480 REACTOME_L1CAM-INTERACTIONS                       | R-RNO-373760  | 5    | -0.419935 | -0.882346 | 0.609037  | 1.000000  | 1.000      |
| 481 GOBP-MUSCLE-SYSTEM-PROCESS                        | GO-0003012    | 9    | -0.333340 | -0.882634 | 0.592593  | 1.000000  | 1.000      |
| 482 GOBP-FOREBRAIN-DEVELOPMENT                        | GO-0030900    | 9    | -0.348172 | -0.882935 | 0.603571  | 1.000000  | 1.000      |
| 483 GOBP-NEGATIVE-REGULATION-OF-IMMUNE-SYSTEM-PROCESS | GO-0002683    | 5    | -0.418955 | -0.883651 | 0.634387  | 1.000000  | 1.000      |
| 484 GOBP-LIPID-LOCALIZATION                           | GO-0010876    | 10   | -0.332354 | -0.888362 | 0.608939  | 1.000000  | 1.000      |
| 485 GOBP-LIPID-BIOSYNTHETIC-PROCESS                   | GO-0008610    | 6    | -0.388824 | -0.889669 | 0.585687  | 1.000000  | 1.000      |
| 486 REACTOME-OPIOID-SIGNALING                         | R-RNO-111885  | 12   | -0.316882 | -0.890202 | 0.615809  | 1.000000  | 1.000      |
| 487 GOBP-REGULATION-OF-LIPID-BIOSYNTHETIC-PROCESS     | GO-0046890    | 6    | -0.388824 | -0.891199 | 0.608696  | 1.000000  | 1.000      |
| 488 GOBP-REGULATION-OF-LIPID-METABOLIC-PROCESS        | GO-0019216    | 7    | -0.366724 | -0.891576 | 0.606589  | 1.000000  | 1.000      |
| 489 GOBP-RESPONSE-TO-EXTRACELLULAR-STIMULUS           | GO-0009991    | 13   | -0.308974 | -0.899458 | 0.571691  | 1.000000  | 1.000      |
| 490 GOBP-POSITIVE-REGULATION-OF-IMMUNE-RESPONSE       | GO-0050778    | 9    | -0.351577 | -0.899844 | 0.578067  | 1.000000  | 1.000      |
| 491 GOBP-REGULATION-OF-APOPTOTIC-SIGNALING-PATHWAY    | GO-2001233    | 10   | -0.334615 | -0.901610 | 0.589416  | 1.000000  | 1.000      |
| 492 GOBP-REGULATION-OF-PROTEIN-STABILITY              | GO-0031647    | 5    | -0.418211 | -0.902545 | 0.574040  | 1.000000  | 1.000      |
| 493 GOBP-REGULATION-OF-MULTICELLULAR-ORGANISMAL.DE... | GO-2000026    | 31   | -0.257397 | -0.906882 | 0.599343  | 1.000000  | 1.000      |
| 494 GOBP-REGULATION-OF-CELL-DIFFERENTIATION           | GO-0045595    | 36   | -0.251371 | -0.906986 | 0.611667  | 1.000000  | 1.000      |
| 495 GOBP-REGULATION-OF-ION-TRANSPORT                  | GO-0043269    | 36   | -0.256301 | -0.911642 | 0.585586  | 0.999507  | 1.000      |
| 496 GOBP-CIRCULATORY-SYSTEM-PROCESS                   | GO-0003013    | 5    | -0.434575 | -0.912002 | 0.579048  | 1.000000  | 1.000      |
| 497 REACTOME-RNA-POLYMERASE-II-TRANSCRIPTION          | R-RNO-73857   | 20   | -0.281754 | -0.912620 | 0.588441  | 1.000000  | 1.000      |
| 498 GOBP-HOMEOSTASIS-OF-NUMBER-OF-CELLS               | GO-0048872    | 5    | -0.441927 | -0.912791 | 0.541267  | 1.000000  | 1.000      |
| 499 GOBP-RESPONSE-TO-OXYGEN-LEVELS                    | GO-0070482    | 8    | -0.359091 | -0.913025 | 0.593284  | 1.000000  | 1.000      |
| 500 GOBP-NEGATIVE-REGULATION-OF-NEURON-DEATH          | GO-1901215    | 11   | -0.333774 | -0.913181 | 0.566794  | 1.000000  | 1.000      |
| 501 GOBP-REGULATION-OF-HEMOPOIESIS                    | GO-1903706    | 10   | -0.336589 | -0.913780 | 0.573386  | 1.000000  | 1.000      |
| 502 GOBP-MEMBRANE-ORGANIZATION                        | GO-0061024    | 12   | -0.328512 | -0.916532 | 0.559322  | 1.000000  | 1.000      |
| 503 GOBP-AGING                                        | GO-0007568    | 13   | -0.314324 | -0.917559 | 0.572183  | 1.000000  | 1.000      |
| 504 GOBP-REGULATION-OF-IMMUNE-SYSTEM-PROCESS          | GO-0002682    | 21   | -0.281532 | -0.918504 | 0.568995  | 1.000000  | 1.000      |
| 505 GOBP-MUSCLE-CELL-PROLIFERATION                    | GO-0033002    | 8    | -0.360822 | -0.919022 | 0.530055  | 1.000000  | 1.000      |
| 506 GOBP-CELL-CYCLE                                   | GO-0007049    | 21   | -0.287419 | -0.923409 | 0.592721  | 1.000000  | 1.000      |
| 507 GOBP-SEXUAL-REPRODUCTION                          | GO-0019953    | 10   | -0.343185 | -0.923677 | 0.549719  | 1.000000  | 1.000      |
| 508 GOBP-NEGATIVE-REGULATION-OF-CELL-PROJECTION.OR... | GO-0031345    | 5    | -0.429033 | -0.926137 | 0.536680  | 1.000000  | 1.000      |
| 509 GOBP-NEGATIVE-REGULATION-OF-TRANSPORT             | GO-0051051    | 13   | -0.319679 | -0.926790 | 0.555957  | 1.000000  | 1.000      |
| 510 GOBP-TAXIS                                        | GO-0042330    | 14   | -0.313669 | -0.930418 | 0.528029  | 1.000000  | 1.000      |
| 511 GOBP-NEGATIVE-REGULATION-OF-PROTEIN-METABOLIC...  | GO-0051248    | 20   | -0.292818 | -0.932154 | 0.570690  | 1.000000  | 1.000      |
| 512 GOBP-REGULATION-OF-LYMPHOCYTE-ACTIVATION          | GO-0051249    | 5    | -0.443989 | -0.933993 | 0.523232  | 1.000000  | 1.000      |
| 513 GOBP-TISSUE-MIGRATION                             | GO-0090130    | 9    | -0.368271 | -0.938072 | 0.529740  | 1.000000  | 1.000      |

Continuation of Table S17

| NAME | ID                                                | SIZE | ES        | NES       | NOM.p.val | FDR.q.val | FWER.p.val |
|------|---------------------------------------------------|------|-----------|-----------|-----------|-----------|------------|
| 514  | GOBP-NEGATIVE-REGULATION-OF-BIOSYNTHETIC-PROCESS  | 13   | -0.324287 | -0.938104 | 0.522769  | 1.000000  | 1.000      |
| 515  | GOBP-REGULATION-OF-CELLULAR-AMIDE-METABOLIC-PR... | 9    | -0.356078 | -0.939209 | 0.539823  | 1.000000  | 1.000      |
| 516  | GOBP-NEURON-DIFFERENTIATION                       | 36   | -0.260207 | -0.941202 | 0.553691  | 1.000000  | 1.000      |
| 517  | GOBP-MULTICELLULAR-ORGANISMAL-HOMEOSTASIS         | 12   | -0.328087 | -0.945827 | 0.526882  | 1.000000  | 1.000      |
| 518  | GOBP-CELLULAR-RESPONSE-TO-CADMIIUM                | 15   | -0.439672 | -0.946908 | 0.525714  | 1.000000  | 1.000      |
| 519  | GOBP-MITOCHONDRIUM-ORGANIZATION                   | 7    | -0.400982 | -0.947426 | 0.493433  | 1.000000  | 1.000      |
| 520  | GOBP-ESTABLISHMENT-OF-PROTEIN-LOCALIZATION        | 18   | -0.302140 | -0.949733 | 0.520761  | 1.000000  | 1.000      |
| 521  | REACTOME-HEMOSTASIS                               | 14   | -0.319070 | -0.953966 | 0.509338  | 1.000000  | 1.000      |
| 522  | GOBP-REGULATION-OF-NEURONAL-SYNAPTIC-PLASTICITY   | 7    | -0.396569 | -0.955004 | 0.491651  | 1.000000  | 1.000      |
| 523  | REACTOME-SIGNALING-BY-GPCR                        | 22   | -0.293603 | -0.959340 | 0.514580  | 1.000000  | 1.000      |
| 524  | GOBP-PEPTIDYL-SERINE-MODIFICATION                 | 12   | -0.343046 | -0.960068 | 0.477860  | 1.000000  | 1.000      |
| 525  | GOBP-RESPONSE-TO-ABIOTIC-STIMULUS                 | 27   | -0.279535 | -0.962076 | 0.505357  | 1.000000  | 1.000      |
| 526  | GOBP-POSITIVE-REGULATION-OF-ESTABLISHMENT-OF-P... | 5    | -0.459867 | -0.965862 | 0.500000  | 1.000000  | 1.000      |
| 527  | GOBP-RESPONSE-TO-ALKALOID                         | 5    | -0.461792 | -0.966374 | 0.501859  | 1.000000  | 1.000      |
| 528  | GOBP-POSITIVE-REGULATION-OF-EPITHELIAL-CELL-M...  | 5    | -0.444285 | -0.969285 | 0.482176  | 1.000000  | 1.000      |
| 529  | GOBP-REGULATION-OF-PHOSPHORUS-METABOLIC-PROCESS   | 27   | -0.280212 | -0.969288 | 0.494585  | 1.000000  | 1.000      |
| 530  | GOBP-RESPIRATORY-SYSTEM-DEVELOPMENT               | 6    | -0.425602 | -0.970452 | 0.480151  | 1.000000  | 1.000      |
| 531  | REACTOME-TRAFFICKING-OF-GLUR2-CONTAINING-AMPA-... | 8    | -0.389211 | -0.970595 | 0.503846  | 1.000000  | 1.000      |
| 532  | GOBP-RESPONSE-TO-TUMOR-NECROSIS-FACTOR            | 7    | -0.416594 | -0.971300 | 0.485437  | 1.000000  | 1.000      |
| 533  | GOBP-MUSCLE-TISSUE-DEVELOPMENT                    | 11   | -0.349242 | -0.971709 | 0.488055  | 1.000000  | 1.000      |
| 534  | GOBP-REGULATION-OF-HORMONE-LEVELS                 | 12   | -0.344315 | -0.971828 | 0.486289  | 1.000000  | 1.000      |
| 535  | HALLMARK-ALLOGRAFT-REJECTION                      | 7    | -0.408881 | -0.972166 | 0.495238  | 1.000000  | 1.000      |
| 536  | GOBP-CELLULAR-COMPONENT-MAINTENANCE               | 5    | -0.450586 | -0.973630 | 0.486339  | 1.000000  | 1.000      |
| 537  | GOBP-MONAMINE-TRANSPORT                           | 5    | -0.455045 | -0.976931 | 0.490458  | 1.000000  | 1.000      |
| 538  | GOBP-REGULATION-OF-VESICLE-MEDIATED-TRANSPORT     | 12   | -0.343768 | -0.978932 | 0.489484  | 1.000000  | 1.000      |
| 539  | GOBP-NEGATIVE-REGULATION-OF-PHOSPHORUS-METABOL... | 9    | -0.378151 | -0.983265 | 0.450835  | 1.000000  | 1.000      |
| 540  | GOBP-ESTABLISHMENT-OF-PROTEIN-LOCALIZATION-TO-... | 6    | -0.424945 | -0.983634 | 0.445087  | 1.000000  | 1.000      |
| 541  | GOBP-NEGATIVE-REGULATION-OF-CELL-DEATH            | 22   | -0.293635 | -0.984654 | 0.498246  | 1.000000  | 1.000      |
| 542  | GOBP-SKIN-DEVELOPMENT                             | 5    | -0.455807 | -0.985693 | 0.464627  | 1.000000  | 1.000      |
| 543  | GOBP-INTRINSIC-APOPTOTIC-SIGNALING-PATHWAY        | 5    | -0.474233 | -0.986493 | 0.480151  | 1.000000  | 1.000      |
| 544  | GOBP-NEGATIVE-REGULATION-OF-HYDROLASE-ACTIVITY    | 11   | -0.353201 | -0.986570 | 0.468806  | 1.000000  | 1.000      |
| 545  | GOBP-REGULATION-OF-SECRETION                      | 14   | -0.332096 | -0.987147 | 0.473776  | 1.000000  | 1.000      |
| 546  | GOBP-POSITIVE-REGULATION-OF-SECRETION             | 6    | -0.437681 | -0.988090 | 0.462121  | 1.000000  | 1.000      |
| 547  | GOBP-PROTEIN-AUTOPHOSPHORYLATION                  | 5    | -0.466222 | -0.988456 | 0.459259  | 1.000000  | 1.000      |
| 548  | GOBP-LIPID-EXPORT-FROM-CELL                       | 5    | -0.455096 | -0.989409 | 0.452865  | 1.000000  | 1.000      |
| 549  | GOBP-NEGATIVE-REGULATION-OF-NUCLEOBASE-CONTAIN... | 13   | -0.340262 | -0.989511 | 0.448276  | 1.000000  | 1.000      |
| 550  | GOBP-PROTEIN-LOCALIZATION-TO-ORGANELLE            | 9    | -0.378395 | -0.990193 | 0.449458  | 1.000000  | 1.000      |
| 551  | GOBP-NEGATIVE-REGULATION-OF-PROTEIN-MODIFICATI... | 10   | -0.373822 | -0.990643 | 0.480874  | 1.000000  | 1.000      |
| 552  | REACTOME-ONCOGENIC-MAPK-SIGNALING                 | 5    | -0.465631 | -1.000876 | 0.457295  | 1.000000  | 1.000      |
| 553  | GOBP-EPITHELIAL-DEVELOPMENT                       | 15   | -0.334743 | -1.001599 | 0.456637  | 1.000000  | 1.000      |
| 554  | REACTOME-PLATELET-ACTIVATION-SIGNALING-AND-AGG... | 7    | -0.420169 | -1.002076 | 0.448399  | 1.000000  | 1.000      |
| 555  | GOBP-ERBB-SIGNALING-PATHWAY                       | 5    | -0.472232 | -1.003205 | 0.453668  | 1.000000  | 1.000      |
| 556  | GOBP-CELLULAR-MACROMOLECULE-CATABOLIC-PROCESS     | 6    | -0.440747 | -1.003959 | 0.434109  | 1.000000  | 1.000      |

Continuation of Table S17

| NAME | ID                                                 | SIZE | ES        | NES       | NOM.p.val | FDR.q.val | FWER.p.val |
|------|----------------------------------------------------|------|-----------|-----------|-----------|-----------|------------|
| 557  | GOBP-MUSCLE-CONTRACTION                            | 5    | -0.483260 | -1.010656 | 0.444444  | 1.000000  | 1.000      |
| 558  | GOBP-REGULATION.OF.GTPASE.ACTIVITY                 | 5    | -0.466401 | -1.012724 | 0.432971  | 1.000000  | 1.000      |
| 559  | GOBP-NEGATIVE-REGULATION.OF.RESPONSE.TO.STIMULUS   | 16   | -0.340426 | -1.015809 | 0.436330  | 1.000000  | 1.000      |
| 560  | GOBP-SECRETION                                     | 24   | -0.304797 | -1.016794 | 0.442341  | 1.000000  | 1.000      |
| 561  | GOBP-RESPONSE.TO.OXIDATIVE-STRESS                  | 8    | -0.411000 | -1.017841 | 0.436090  | 1.000000  | 1.000      |
| 562  | GOBP-ENDOTHELIAL-CELL-PROLIFERATION                | 8    | -0.404972 | -1.020263 | 0.408318  | 1.000000  | 1.000      |
| 563  | GOBP-NEURON-DEATH                                  | 18   | -0.321066 | -1.020649 | 0.408273  | 1.000000  | 1.000      |
| 564  | GOBP-POSITIVE-REGULATION.OF.ORGANELLE-ORGANIZA...  | 10   | -0.375709 | -1.021307 | 0.425243  | 1.000000  | 1.000      |
| 565  | GOBP-EPIDERMIS-DEVELOPMENT                         | 5    | -0.479728 | -1.022036 | 0.448718  | 1.000000  | 1.000      |
| 566  | GOBP-MYELOID-LEUKOCYTE-DIFFERENTIATION             | 11   | -0.376473 | -1.023769 | 0.428846  | 1.000000  | 1.000      |
| 567  | GOBP-RESPONSE.TO.MONOSACCHARIDE                    | 5    | -0.481747 | -1.024687 | 0.410646  | 1.000000  | 1.000      |
| 568  | GOBP-RESPONSE.TO.CARBOHYDRATE                      | 5    | -0.481747 | -1.024895 | 0.425612  | 1.000000  | 1.000      |
| 569  | GOBP-CELLULAR-RESPONSE.TO.PEPTIDE                  | 13   | -0.362164 | -1.030840 | 0.425725  | 1.000000  | 1.000      |
| 570  | GOBP-RESPONSE.TO.PEPTIDE.HORMONE                   | 13   | -0.373743 | -1.032592 | 0.434028  | 1.000000  | 1.000      |
| 571  | GOBP-RESPONSE.TO.TEMPERATURE.STIMULUS              | 9    | -0.399247 | -1.032598 | 0.392336  | 1.000000  | 1.000      |
| 572  | GOBP-RESPONSE.TO.REACTIVE.OXYGEN-SPECIES           | 8    | -0.411000 | -1.039949 | 0.395872  | 1.000000  | 1.000      |
| 573  | REACTOME-EXTRA_NUCLEAR-ESTROGEN-SIGNALING          | 7    | -0.450473 | -1.044871 | 0.395221  | 1.000000  | 1.000      |
| 574  | GOBP-CIRCULATORY-SYSTEM-DEVELOPMENT                | 21   | -0.320841 | -1.046599 | 0.382143  | 1.000000  | 1.000      |
| 575  | GOBP-POSITIVE-REGULATION.OF.ENDOTHELIAL-CELL.P...  | 6    | -0.458149 | -1.047039 | 0.403013  | 1.000000  | 1.000      |
| 576  | GOBP-POSTTRANSCRIPTIONAL-REGULATION.OF.GENE.EX...  | 8    | -0.415152 | -1.047486 | 0.395307  | 1.000000  | 1.000      |
| 577  | GOBP-CELLULAR-RESPONSE.TO.MOLECULE.OF.BACTERIA...  | 8    | -0.421684 | -1.050226 | 0.403704  | 1.000000  | 1.000      |
| 578  | REACTOME-NGF-STIMULATED-TRANSCRIPTION              | 9    | -0.413370 | -1.053783 | 0.397790  | 1.000000  | 1.000      |
| 579  | GOBP-HOMEOSTATIC-PROCESS                           | 31   | -0.294474 | -1.054194 | 0.364407  | 1.000000  | 1.000      |
| 580  | GOBP-CARBOHYDRATE-HOMEOSTASIS                      | 7    | -0.441105 | -1.054769 | 0.381982  | 1.000000  | 1.000      |
| 581  | GOBP-PEPTIDYL-AMINO-ACID-MODIFICATION              | 22   | -0.321413 | -1.055029 | 0.403571  | 1.000000  | 1.000      |
| 582  | GOBP-CELLULAR-RESPONSE.TO.BIOTIC-STIMULUS          | 8    | -0.421684 | -1.055460 | 0.361624  | 1.000000  | 1.000      |
| 583  | GOBP-G-PROTEIN-COUPLED-GLUTAMATE-RECEPTOR-SIGN...  | 8    | -0.432013 | -1.055966 | 0.387097  | 1.000000  | 1.000      |
| 584  | GOBP-POSITIVE-REGULATION.OF.MULTICELLULAR.ORGAN... | 32   | -0.302216 | -1.057806 | 0.376491  | 1.000000  | 1.000      |
| 585  | GOBP-CELLULAR-RESPONSE.TO.HORMONE-STIMULUS         | 11   | -0.382360 | -1.058641 | 0.377163  | 1.000000  | 1.000      |
| 586  | GOBP-POSITIVE-REGULATION.OF.APOPTOTIC-SIGNALIN...  | 5    | -0.508850 | -1.069576 | 0.364662  | 1.000000  | 1.000      |
| 587  | REACTOME_NUCLEAR-EVENTS-KINASE-AND-TRANSCRIPTI...  | 11   | -0.399388 | -1.082255 | 0.373473  | 1.000000  | 1.000      |
| 588  | REACTOME-INTRACELLULAR-SIGNALING_BY_SECOND_MES...  | 15   | -0.363970 | -1.082823 | 0.343525  | 1.000000  | 1.000      |
| 589  | GOBP-SENSORY_PERCEPTION_OF_PAIN                    | 5    | -0.514541 | -1.097756 | 0.337864  | 1.000000  | 1.000      |
| 590  | GOBP-VESICLE-MEDIATED-TRANSPORT-IN-SYNAPSE         | 7    | -0.457735 | -1.099625 | 0.335849  | 1.000000  | 1.000      |
| 591  | GOBP-ENZYME-LINKED-RECEPTOR-PROTEIN-SIGNALING....  | 24   | -0.329189 | -1.103545 | 0.340619  | 1.000000  | 1.000      |
| 592  | GOBP-RESPONSE.TO.MOLECULE.OF.BACTERIAL-ORIGIN      | 13   | -0.381479 | -1.108690 | 0.310219  | 1.000000  | 1.000      |
| 593  | GOBP-REGULATION.OF.PROTEIN-MODIFICATION_PROCESS    | 29   | -0.321889 | -1.111505 | 0.362500  | 1.000000  | 1.000      |
| 594  | GOBP-SIGNAL-RELEASE                                | 14   | -0.364823 | -1.112872 | 0.325000  | 1.000000  | 1.000      |
| 595  | REACTOME-CLASS_C_3-METABOTROPIC-GLUTAMATE-PHER...  | 7    | -0.467421 | -1.113107 | 0.323917  | 1.000000  | 1.000      |
| 596  | GOBP-RESPONSE.TO.BACTERIUM                         | 13   | -0.381479 | -1.114098 | 0.300725  | 1.000000  | 1.000      |
| 597  | GOBP-DEFENSE-RESPONSE.TO.OTHER-ORGANISM            | 9    | -0.424023 | -1.116243 | 0.317940  | 1.000000  | 1.000      |
| 598  | GOBP-T-CELL-ACTIVATION                             | 8    | -0.440402 | -1.116846 | 0.311808  | 1.000000  | 1.000      |
| 599  | GOBP-IMMUNE-EFFECTOR-PROCESS                       | 10   | -0.421477 | -1.118004 | 0.319312  | 1.000000  | 1.000      |



Continuation of Table S17

|     | NAME                                              | ID            | SIZE | ES        | NES       | NOM.p.val | FDR.q.val | FWER.p.val |
|-----|---------------------------------------------------|---------------|------|-----------|-----------|-----------|-----------|------------|
| 600 | GOBP-POSITIVE-REGULATION_OF_CYTOKINE-PRODUCTION   | GO-0001819    | 7    | -0.473974 | -1.122191 | 0.323793  | 1.000000  | 1.000      |
| 601 | GOBP-MYELOID-CELL-DIFFERENTIATION                 | GO-0030099    | 13   | -0.394082 | -1.124852 | 0.323636  | 1.000000  | 1.000      |
| 602 | GOBP-INTRACELLULAR-PROTEIN-TRANSPORT              | GO-0006886    | 9    | -0.434450 | -1.125901 | 0.304348  | 1.000000  | 1.000      |
| 603 | GOBP-REGULATION_OF_CELLULAR-RESPONSE_TO_STRESS    | GO-0080135    | 9    | -0.436322 | -1.133599 | 0.282908  | 1.000000  | 1.000      |
| 604 | GOBP-CIRCADIAN-RHYTHM                             | GO-0007623    | 13   | -0.398569 | -1.135474 | 0.289617  | 1.000000  | 1.000      |
| 605 | GOBP-RESPONSE_TO_CADMIUM_ION                      | GO-0046686    | 6    | -0.497680 | -1.135741 | 0.298279  | 1.000000  | 1.000      |
| 606 | GOBP-NEGATIVE-REGULATION_OF_DEVELOPMENTAL-PROCESS | GO-0051093    | 13   | -0.401756 | -1.136608 | 0.284710  | 1.000000  | 1.000      |
| 607 | REACTOME-GPCR-LIGAND-BINDING                      | R-RNO-500792  | 8    | -0.450624 | -1.137968 | 0.302632  | 1.000000  | 1.000      |
| 608 | GOBP-TISSUE-HOMEOSTASIS                           | GO-0001894    | 5    | -0.551256 | -1.138624 | 0.306358  | 1.000000  | 1.000      |
| 609 | GOBP-TRANSMEMBRANE-RECEPTOR-PROTEIN-SERINE-THR... | GO-0007178    | 6    | -0.508179 | -1.140026 | 0.322097  | 1.000000  | 1.000      |
| 610 | REACTOME-PTEN-REGULATION                          | R-RNO-6807070 | 5    | -0.536815 | -1.140867 | 0.321839  | 1.000000  | 1.000      |
| 611 | GOBP-MUSCLE-ORGAN-DEVELOPMENT                     | GO-0007517    | 9    | -0.443124 | -1.141710 | 0.296429  | 1.000000  | 1.000      |
| 612 | GOBP-RESPONSE_TO_CYTOKINE                         | GO-0034097    | 23   | -0.341815 | -1.147188 | 0.290844  | 1.000000  | 1.000      |
| 613 | REACTOME-G-PROTEIN-MEDIATED-EVENTS                | GO-0007423    | 9    | -0.443302 | -1.148263 | 0.292776  | 1.000000  | 1.000      |
| 614 | HALLMARK-TNFA-SIGNALING-VIA-NFKB                  | M5890         | 14   | -0.388945 | -1.149273 | 0.281250  | 1.000000  | 1.000      |
| 615 | GOBP-CELLULAR-RESPONSE_TO_CHEMICAL-STRESS         | GO-0062197    | 7    | -0.478848 | -1.152781 | 0.312741  | 1.000000  | 1.000      |
| 616 | GOBP-CELLULAR-RESPONSE_TO_REACTIVE-OXYGEN-SPECIES | GO-0034614    | 7    | -0.478848 | -1.157208 | 0.282477  | 1.000000  | 1.000      |
| 617 | GOBP-SENSORY-ORGAN-DEVELOPMENT                    | GO-0007423    | 8    | -0.459658 | -1.157982 | 0.275605  | 1.000000  | 1.000      |
| 618 | GOBP-RESPONSE_TO_NITROGEN-COMPOUND                | GO-1901698    | 34   | -0.324602 | -1.158801 | 0.260274  | 1.000000  | 1.000      |
| 619 | GOBP-TUBE-DEVELOPMENT                             | GO-0035295    | 18   | -0.367834 | -1.159369 | 0.270945  | 1.000000  | 1.000      |
| 620 | GOBP-RESPONSE_TO_BIOTIC-STIMULUS                  | GO-0009607    | 17   | -0.379776 | -1.161181 | 0.275000  | 1.000000  | 1.000      |
| 621 | GOBP-REGULATION_OF-NEUROTRANSMITTER-LEVELS        | GO-0001505    | 7    | -0.487229 | -1.165854 | 0.258589  | 1.000000  | 1.000      |
| 622 | GOBP-INTRACELLULAR-TRANSPORT                      | GO-0046907    | 11   | -0.427955 | -1.168588 | 0.284895  | 1.000000  | 1.000      |
| 623 | GOBP-MULTI-ORGANISM-PROCESS                       | GO-0051704    | 16   | -0.385973 | -1.169561 | 0.252951  | 1.000000  | 1.000      |
| 624 | GOBP-INTRACELLULAR-RECEPTOR-SIGNALING-PATHWAY     | GO-0030522    | 5    | -0.547279 | -1.171722 | 0.279029  | 1.000000  | 1.000      |
| 625 | GOBP-DEVELOPMENTAL-PROCESS-INVOLVED-IN-REPRODU... | GO-0003006    | 11   | -0.428170 | -1.172364 | 0.273874  | 1.000000  | 1.000      |
| 626 | GOBP-RESPONSE_TO-GROWTH-FACTOR                    | GO-0070848    | 18   | -0.373102 | -1.172486 | 0.270650  | 1.000000  | 1.000      |
| 627 | REACTOME-CA-DEPENDENT-EVENTS                      | R-RNO-111996  | 8    | -0.467645 | -1.173623 | 0.262570  | 1.000000  | 1.000      |
| 628 | GOBP-RESPONSE_TO-WOUNDING                         | GO-0009611    | 15   | -0.394074 | -1.174360 | 0.239604  | 1.000000  | 1.000      |
| 629 | GOBP-REGULATION_OF-TRANSPORT                      | GO-0051049    | 44   | -0.320616 | -1.174566 | 0.230118  | 1.000000  | 1.000      |
| 630 | GOBP-INNATE-IMMUNE-RESPONSE                       | GO-0045087    | 7    | -0.498767 | -1.176941 | 0.246094  | 1.000000  | 1.000      |
| 631 | GOBP-CELLULAR-RESPONSE_TO-DNA-DAMAGE-STIMULUS     | GO-0006974    | 5    | -0.553815 | -1.179150 | 0.274336  | 1.000000  | 1.000      |
| 632 | GOBP-NEUROTRANSMITTER-TRANSPORT                   | GO-0006836    | 7    | -0.487229 | -1.179804 | 0.255083  | 1.000000  | 1.000      |
| 633 | GOBP-CELLULAR-RESPONSE_TO-ABIOTIC-STIMULUS        | GO-0071214    | 7    | -0.489387 | -1.184321 | 0.254335  | 1.000000  | 1.000      |
| 634 | GOBP-NEGATIVE-REGULATION_OF-CELL-DIFFERENTIATION  | GO-0045596    | 13   | -0.401756 | -1.184588 | 0.237660  | 1.000000  | 1.000      |
| 635 | GOBP-POSITIVE-REGULATION_OF-ANION-TRANSPORT       | GO-1903793    | 9    | -0.459818 | -1.185317 | 0.264815  | 1.000000  | 1.000      |
| 636 | GOBP-APOPTOTIC-PROCESS                            | GO-0006915    | 35   | -0.330345 | -1.187828 | 0.229730  | 1.000000  | 1.000      |
| 637 | GOBP-REGULATION_OF-NEUROTRANSMITTER-TRANSPORT     | GO-0051588    | 6    | -0.523714 | -1.204312 | 0.240076  | 1.000000  | 1.000      |
| 638 | GOBP-RESPONSE_TO-ENDOGENOUS-STIMULUS              | GO-0009719    | 34   | -0.336124 | -1.209688 | 0.186047  | 1.000000  | 1.000      |
| 639 | GOBP-MULTICELLULAR-ORGANISM-REPRODUCTION          | GO-0032504    | 12   | -0.418760 | -1.210626 | 0.223636  | 1.000000  | 1.000      |
| 640 | GOBP-RESPONSE_TO-OXYGEN-CONTAINING-COMPOUND       | GO-1901700    | 39   | -0.330835 | -1.210829 | 0.198413  | 1.000000  | 1.000      |
| 641 | GOBP-CELLULAR-GLUCOSE-HOMEOSTASIS                 | GO-0001678    | 5    | -0.579450 | -1.224206 | 0.224206  | 1.000000  | 1.000      |
| 642 | GOBP-POSITIVE-REGULATION_OF-CELLULAR-PROTEIN-L... | GO-1903829    | 7    | -0.519609 | -1.222117 | 0.210630  | 1.000000  | 1.000      |

Continuation of Table S17

| NAME                                                  | ID            | SIZE | ES        | NES       | NOM.p.val | FDR.q.val | FWER.p.val |
|-------------------------------------------------------|---------------|------|-----------|-----------|-----------|-----------|------------|
| 643 REACTOME-CELLULAR_SENESCENCE                      | R-RNO-2559583 | 6    | -0.539751 | -1.231341 | 0.213611  | 1.000000  | 1.000      |
| 644 GOBP-RESPONSE.TO.HORMONE                          | GO-0009725    | 20   | -0.385429 | -1.234662 | 0.175347  | 1.000000  | 1.000      |
| 645 REACTOME_SENESCENCE-ASSOCIATED-SECRETORY_PHENO... | R-RNO-2559582 | 6    | -0.539751 | -1.237579 | 0.227778  | 1.000000  | 1.000      |
| 646 GOBP-POSITIVE-REGULATION-OF-TRANSCRIPTION-BY-R... | GO-0045944    | 24   | -0.373162 | -1.238477 | 0.179115  | 1.000000  | 1.000      |
| 647 GOBP-NUCLEAR-TRANSPORT                            | GO-0051169    | 5    | -0.571574 | -1.239763 | 0.208647  | 1.000000  | 1.000      |
| 648 GOBP-WOUND-HEALING                                | GO-0042060    | 13   | -0.437100 | -1.240211 | 0.209220  | 1.000000  | 1.000      |
| 649 GOBP-ENDOMEMBRANE-SYSTEM-ORGANIZATION             | GO-0010256    | 6    | -0.542079 | -1.241413 | 0.216822  | 1.000000  | 1.000      |
| 650 GOBP-RESPONSE.TO.LIPID                            | GO-0033993    | 19   | -0.394147 | -1.247149 | 0.195164  | 1.000000  | 1.000      |
| 651 GOBP-POSITIVE-REGULATION-OF-RESPONSE.TO-EXTERN... | GO-0032103    | 9    | -0.483751 | -1.254024 | 0.199275  | 1.000000  | 1.000      |
| 652 GOBP-POSITIVE-REGULATION-OF-CELL-POPULATION-PR... | GO-0008284    | 21   | -0.390006 | -1.254825 | 0.169611  | 1.000000  | 1.000      |
| 653 GOBP-SPROUTING-ANGIOGENESIS                       | GO-0002040    | 5    | -0.587800 | -1.255246 | 0.217143  | 1.000000  | 1.000      |
| 654 GOBP-REGULATION-OF-ORGANELLE-ORGANIZATION         | GO-0033043    | 14   | -0.423197 | -1.255777 | 0.177331  | 1.000000  | 1.000      |
| 655 REACTOME-CELL-CYCLE-MITOTIC                       | R-RNO-69278   | 5    | -0.594870 | -1.262422 | 0.215534  | 1.000000  | 1.000      |
| 656 REACTOME-SIGNALING-BY-WNT                         | R-RNO-195721  | 7    | -0.539098 | -1.268229 | 0.215470  | 1.000000  | 1.000      |
| 657 GOBP-POSITIVE-REGULATION-OF-GENE-EXPRESSION       | GO-0010628    | 16   | -0.413721 | -1.273607 | 0.174863  | 1.000000  | 1.000      |
| 658 GOBP-RESPONSE.TO.PEPTIDE                          | GO-1901652    | 18   | -0.409999 | -1.276927 | 0.149228  | 1.000000  | 1.000      |
| 659 GOBP-POSITIVE-REGULATION-OF-BIOSYNTHETIC-PROCESS  | GO-0009891    | 27   | -0.370181 | -1.280812 | 0.142373  | 1.000000  | 1.000      |
| 660 GOBP-ANATOMICAL-STRUCTURE-HOMEOSTASIS             | GO-0060249    | 7    | -0.551538 | -1.293833 | 0.180113  | 1.000000  | 1.000      |
| 661 GOBP-NEUROTRANSMITTER-SECRETION                   | GO-0007269    | 6    | -0.571402 | -1.298017 | 0.167293  | 1.000000  | 1.000      |
| 662 GOBP-REPRODUCTION                                 | GO-0000003    | 18   | -0.415411 | -1.309239 | 0.139746  | 1.000000  | 1.000      |
| 663 GOBP-RESPONSE.TO-INSULIN                          | GO-0032868    | 5    | -0.611207 | -1.309444 | 0.177449  | 1.000000  | 1.000      |
| 664 GOBP-LEUKOCYTE-DIFFERENTIATION                    | GO-0002521    | 15   | -0.436468 | -1.311407 | 0.144366  | 1.000000  | 1.000      |
| 665 GOBP-LYMPHOCYTE-ACTIVATION                        | GO-0046649    | 9    | -0.505247 | -1.312335 | 0.168880  | 1.000000  | 1.000      |
| 666 GOBP-VASCULATURE-DEVELOPMENT                      | GO-0001944    | 17   | -0.412708 | -1.314231 | 0.134513  | 1.000000  | 1.000      |
| 667 REACTOME-G-ALPHA-Z-SIGNALING-EVENTS               | R-RNO-418597  | 5    | -0.599928 | -1.314658 | 0.153846  | 1.000000  | 1.000      |
| 668 GOBP-DNA-METABOLIC-PROCESS                        | GO-0006259    | 6    | -0.590536 | -1.316252 | 0.146947  | 1.000000  | 1.000      |
| 669 REACTOME-G-ALPHA-Q-SIGNALING-EVENTS               | R-RNO-416476  | 6    | -0.574715 | -1.324297 | 0.145422  | 1.000000  | 1.000      |
| 670 GOBP-EPITHELIAL-CELL-PROLIFERATION                | GO-0050673    | 12   | -0.482462 | -1.332953 | 0.123574  | 1.000000  | 1.000      |
| 671 GOBP-NEGATIVE-REGULATION-OF-CELL-POPULATION-PR... | GO-0008285    | 9    | -0.526182 | -1.336109 | 0.164021  | 1.000000  | 1.000      |
| 672 GOBP-EXOCYTOSIS                                   | GO-0006887    | 11   | -0.491934 | -1.338361 | 0.134752  | 1.000000  | 1.000      |
| 673 GOBP-CHROMATIN-ORGANIZATION                       | GO-0006325    | 5    | -0.634096 | -1.350145 | 0.144665  | 1.000000  | 1.000      |
| 674 GOBP-CYTOKINE-PRODUCTION                          | GO-0001816    | 10   | -0.500136 | -1.355593 | 0.123616  | 1.000000  | 1.000      |
| 675 GOBP-CELLULAR-RESPONSE.TO.LIPID                   | GO-0071396    | 15   | -0.451310 | -1.356311 | 0.128521  | 1.000000  | 1.000      |
| 676 GOBP-EMBRYONIC-MORPHOGENESIS                      | GO-0048598    | 6    | -0.598975 | -1.369116 | 0.123260  | 1.000000  | 1.000      |
| 677 GOBP-POSITIVE-REGULATION-OF-NUCLEOBASE-CONTAIN... | GO-0045935    | 28   | -0.404568 | -1.369721 | 0.093537  | 1.000000  | 1.000      |
| 678 GOBP-RHYTHMIC-PROCESS                             | GO-0048511    | 15   | -0.460344 | -1.369945 | 0.123862  | 1.000000  | 1.000      |
| 679 GOBP-CELLULAR-RESPONSE.TO-NITROGEN-COMPOUND       | GO-1901699    | 20   | -0.432242 | -1.375963 | 0.094033  | 1.000000  | 1.000      |
| 680 GOBP-REGULATION-OF-CELL-ACTIVATION                | GO-0050865    | 8    | -0.562184 | -1.391066 | 0.088448  | 1.000000  | 1.000      |
| 681 GOBP-APOPTOTIC-SIGNALING-PATHWAY                  | GO-0097190    | 15   | -0.468701 | -1.395557 | 0.104452  | 1.000000  | 1.000      |
| 682 REACTOME-MEMBRANE-TRAFFICKING                     | R-RNO-199991  | 5    | -0.666381 | -1.422593 | 0.118421  | 0.967296  | 1.000      |
| 683 GOBP-SENSORY_PERCEPTION                           | GO-0007600    | 9    | -0.559274 | -1.426705 | 0.100569  | 0.973322  | 1.000      |
| 684 GOBP-PROTEIN-MODIFICATION-BY-SMALL-PROTEIN-CON... | GO-0070647    | 7    | -0.603033 | -1.427123 | 0.095149  | 0.998888  | 1.000      |
| 685 GOBP-MYELOID-LEUKOCYTE-ACTIVATION                 | GO-0002274    | 8    | -0.581523 | -1.428807 | 0.087199  | 1.000000  | 1.000      |

Continuation of Table S17

| NAME                                                  | ID            | SIZE | ES        | NES       | NOM.p.val | FDR.q.val | FWER.p.val |
|-------------------------------------------------------|---------------|------|-----------|-----------|-----------|-----------|------------|
| 686 REACTOME-VESICLE-MEDIATED-TRANSPORT               | R-RNO-5653656 | 5    | -0.666381 | -1.432497 | 0.104046  | 1.000000  | 1.000      |
| 687 GOBP-LEUKOCYTE-MEDIATED-IMMUNITY                  | GO-0002443    | 7    | -0.606019 | -1.450108 | 0.084149  | 0.965792  | 1.000      |
| 688 GOBP-LOCOMOTORY-BEHAVIOR                          | GO-0007626    | 7    | -0.593397 | -1.450393 | 0.090559  | 0.995552  | 1.000      |
| 689 GOBP-RESPONSE-TO-ORGANIC-CYCLIC-COMPOUND          | GO-0014070    | 20   | -0.450526 | -1.458316 | 0.051002  | 0.983416  | 1.000      |
| 690 GOBP-REGULATION-OF-ANION-TRANSPORT                | GO-0044070    | 20   | -0.444602 | -1.459106 | 0.066318  | 1.000000  | 1.000      |
| 691 GOBP-ANIMAL-ORGAN-MORPHOGENESIS                   | GO-0009887    | 12   | -0.521575 | -1.460099 | 0.073741  | 1.000000  | 1.000      |
| 692 GOBP-IMMUNE-SYSTEM-DEVELOPMENT                    | GO-0002520    | 17   | -0.478511 | -1.461233 | 0.066038  | 1.000000  | 1.000      |
| 693 GOBP-REGULATION-OF-RESPONSE-TO-STRESS             | GO-0080134    | 19   | -0.462979 | -1.467809 | 0.066308  | 1.000000  | 1.000      |
| 694 GOBP-REGULATION-OF-BODY-FLUID-LEVELS              | GO-0050878    | 11   | -0.528423 | -1.475043 | 0.086556  | 1.000000  | 1.000      |
| 695 REACTOME-CELL-CYCLE                               | R-RNO-1640170 | 6    | -0.662755 | -1.476919 | 0.055856  | 1.000000  | 1.000      |
| 696 GOBP-SKELETAL-MUSCLE-ORGAN-DEVELOPMENT            | GO-0060538    | 5    | -0.686747 | -1.479346 | 0.055118  | 1.000000  | 1.000      |
| 697 GOBP-PROTEIN-MODIFICATION-BY-SMALL-PROTEIN-CON... | GO-0032446    | 6    | -0.659361 | -1.491438 | 0.069943  | 1.000000  | 1.000      |
| 698 REACTOME-BETA-CATENIN-INDEPENDENT-WNT-SIGNALING   | R-RNO-3858494 | 5    | -0.699678 | -1.493149 | 0.058712  | 1.000000  | 1.000      |
| 699 GOBP-ANATOMICAL-STRUCTURE-FORMATION-INVOLVED-I... | GO-0048646    | 20   | -0.454745 | -1.495917 | 0.052158  | 1.000000  | 1.000      |
| 700 GOBP-REGULATION-OF-RESPONSE-TO-EXTERNAL-STIMULUS  | GO-0032101    | 15   | -0.511835 | -1.507414 | 0.042403  | 1.000000  | 1.000      |
| 701 GOBP-MONONUCLEAR-CELL-DIFFERENTIATION             | GO-1903131    | 7    | -0.629639 | -1.525069 | 0.064912  | 1.000000  | 1.000      |
| 702 GOBP-ORGANIC-HYDROXY-COMPOUND-TRANSPORT           | GO-0015850    | 6    | -0.674419 | -1.528868 | 0.054820  | 1.000000  | 1.000      |
| 703 REACTOME-RHO-GTPASE-EFFECTORS                     | R-RNO-195258  | 9    | -0.604415 | -1.539969 | 0.054206  | 1.000000  | 1.000      |
| 704 GOBP-PEPTIDYL-LYSINE-MODIFICATION                 | GO-0018205    | 5    | -0.729186 | -1.545917 | 0.047445  | 1.000000  | 1.000      |
| 705 GOBP-CHROMOSOME-ORGANIZATION                      | GO-0051276    | 6    | -0.688163 | -1.585605 | 0.025440  | 0.963933  | 1.000      |
| 706 GOBP-CELLULAR-RESPONSE-TO-OXYGEN-CONTAINING-CO... | GO-1901701    | 29   | -0.458270 | -1.586052 | 0.020443  | 1.000000  | 1.000      |
| 707 GOBP-CIRCADIAN-REGULATION-OF-GENE-EXPRESSION      | GO-0032922    | 5    | -0.751861 | -1.587849 | 0.027290  | 1.000000  | 1.000      |
| 708 REACTOME-SIGNALING-BY-RHO-GTPASES-MIRO-GTPASES... | R-RNO-9716542 | 9    | -0.604415 | -1.588145 | 0.038168  | 1.000000  | 1.000      |
| 709 GOBP-CELL-POPULATION-PROLIFERATION                | GO-0008283    | 31   | -0.447355 | -1.599630 | 0.022034  | 1.000000  | 1.000      |
| 710 GOBP-CELLULAR-RESPONSE-TO-ORGANIC-CYCLIC-COMPOUND | GO-0071407    | 13   | -0.560914 | -1.630957 | 0.026502  | 1.000000  | 1.000      |
| 711 GOBP-REPRODUCTIVE-SYSTEM-DEVELOPMENT              | GO-0061458    | 6    | -0.729849 | -1.661377 | 0.009174  | 0.965187  | 1.000      |
| 712 GOBP-RESPONSE-TO-INTERLEUKIN-1                    | GO-0070555    | 5    | -0.781354 | -1.682932 | 0.017208  | 0.940891  | 1.000      |
| 713 GOBP-COAGULATION                                  | GO-0050817    | 8    | -0.676126 | -1.709760 | 0.020794  | 0.878536  | 0.995      |
| 714 GOBP-PLATELET-ACTIVATION                          | GO-0030168    | 6    | -0.777872 | -1.756444 | 0.007692  | 0.706238  | 0.974      |
| 715 REACTOME-NEUTROPHIL-DEGRANULATION                 | R-RNO-6798695 | 6    | -0.789539 | -1.767587 | 0.003466  | 0.807992  | 0.964      |
| 716 GOBP-MYELOID-LEUKOCYTE-MEDIATED-IMMUNITY          | GO-0002444    | 6    | -0.789539 | -1.787366 | 0.003906  | 0.897560  | 0.935      |
| 717 GOBP-CELL-ACTIVATION-INVOLVED-IN-IMMUNE-RESPONSE  | GO-0002263    | 6    | -0.789539 | -1.810870 | 0.005386  | 1.000000  | 0.892      |
| 718 GOBP-CELL-ACTIVATION                              | GO-0001775    | 21   | -0.566059 | -1.827684 | 0.003503  | 1.000000  | 0.844      |

End of Table

Supplementary Table S18: CB early profile (8 DPL peak) GSEA results.

| Begin of Table S18 |                                                   |               |      |          |          |           |           |            |  |
|--------------------|---------------------------------------------------|---------------|------|----------|----------|-----------|-----------|------------|--|
|                    | NAME                                              | ID            | SIZE | ES       | NES      | NOM.p.val | FDR.q.val | FWER.p.val |  |
| 0                  | GOBP-POSITIVE-REGULATION_OF_TRANSMEMBRANE_TRAN... | GO-0034764    | 7    | 0.634079 | 1.681567 | 0.018100  | 1.000000  | 0.949      |  |
| 1                  | GOBP-POSITIVE-REGULATION_OF_CATION_TRANSMEMBR...  | GO-1904064    | 5    | 0.685165 | 1.601183 | 0.050000  | 1.000000  | 0.989      |  |
| 2                  | HALLMARK-P13K-AKT-MTOR-SIGNALING                  | M5923         | 6    | 0.595609 | 1.559698 | 0.052209  | 1.000000  | 0.994      |  |
| 3                  | GOBP-MAINTENANCE-OF-LOCATION                      | GO-0051235    | 7    | 0.548383 | 1.487546 | 0.053812  | 1.000000  | 1.000      |  |
| 4                  | GOBP-POSITIVE-REGULATION_OF_SMOOTH_MUSCLE_CELL... | GO-0048661    | 5    | 0.626506 | 1.450866 | 0.073913  | 1.000000  | 1.000      |  |
| 5                  | GOBP-MULTICELLULAR_ORGANISMAL_RESPONSE_TO_STRESS  | GO-0033555    | 5    | 0.590239 | 1.400324 | 0.090909  | 1.000000  | 1.000      |  |
| 6                  | GOBP-REGULATION_OF_CELL_SIZE                      | GO-0008361    | 5    | 0.602410 | 1.398462 | 0.099617  | 1.000000  | 1.000      |  |
| 7                  | GOBP-DEVELOPMENTAL_CELL-GROWTH                    | GO-0048588    | 5    | 0.578313 | 1.350037 | 0.105660  | 1.000000  | 1.000      |  |
| 8                  | GOBP-REGULATION_OF_CELLULAR_COMPONENT_SIZE        | GO-0032535    | 7    | 0.481481 | 1.291670 | 0.116279  | 1.000000  | 1.000      |  |
| 9                  | HALLMARK-EPITHELIAL_MESENCHYMAL_TRANSITION        | M5930         | 5    | 0.542169 | 1.279244 | 0.150376  | 1.000000  | 1.000      |  |
| 10                 | GOBP-POSITIVE-REGULATION_OF_CELL-GROWTH           | GO-0044255    | 6    | 0.500000 | 1.255753 | 0.162879  | 1.000000  | 1.000      |  |
| 11                 | GOBP-CELLULAR_LIPID_METABOLIC_PROCESS             | GO-0004255    | 7    | 0.463166 | 1.249504 | 0.181373  | 1.000000  | 1.000      |  |
| 12                 | GOBP-IMPORT-INTO-CELL                             | GO-0098657    | 6    | 0.487805 | 1.239003 | 0.163180  | 1.000000  | 1.000      |  |
| 13                 | GOBP-RESPONSE-TO-ETHANOL                          | GO-0045471    | 5    | 0.530120 | 1.235441 | 0.189003  | 1.000000  | 1.000      |  |
| 14                 | GOBP-LEUKOCYTE-MIGRATION                          | GO-0050900    | 6    | 0.473379 | 1.183697 | 0.247826  | 1.000000  | 1.000      |  |
| 15                 | GOBP-NEUROTRANSMITTER_TRANSPORT                   | GO-0006836    | 7    | 0.419753 | 1.175854 | 0.240000  | 1.000000  | 1.000      |  |
| 16                 | GOBP-NEUROINFLAMMATORY_RESPONSE                   | GO-0150076    | 5    | 0.506024 | 1.175312 | 0.216867  | 1.000000  | 1.000      |  |
| 17                 | GOBP-REGULATION_OF_PPTIDYL_TYROSINE_PHOSPHORY...  | GO-0050730    | 9    | 0.379754 | 1.169050 | 0.251337  | 1.000000  | 1.000      |  |
| 18                 | GOBP-PURINE-CONTAINING-COMPOUND_METABOLIC_PROCESS | GO-0072521    | 5    | 0.506024 | 1.158525 | 0.248120  | 1.000000  | 1.000      |  |
| 19                 | GOBP-REGULATION_OF_CIRCADIAN_RHYTHM               | GO-0042752    | 7    | 0.419753 | 1.141470 | 0.231405  | 1.000000  | 1.000      |  |
| 20                 | REACTOME-ADAPTIVE-IMMUNE-SYSTEM                   | R-RNO-1280218 | 9    | 0.376899 | 1.124814 | 0.238806  | 1.000000  | 1.000      |  |
| 21                 | GOBP-CALCIUM-MEDIATED-SIGNALING                   | GO-0019722    | 10   | 0.344439 | 1.124603 | 0.255556  | 1.000000  | 1.000      |  |
| 22                 | GOBP-REGULATION_OF_NEUROTRANSMITTER_LEVELS        | GO-0001505    | 7    | 0.419753 | 1.120681 | 0.261044  | 1.000000  | 1.000      |  |
| 23                 | GOBP-POSITIVE-REGULATION_OF_DNA-BINDING_TRANSC... | GO-0051091    | 10   | 0.355452 | 1.098615 | 0.320442  | 1.000000  | 1.000      |  |
| 24                 | GOBP-PHAGOCYTOSIS                                 | GO-0006909    | 5    | 0.474411 | 1.097960 | 0.307407  | 1.000000  | 1.000      |  |
| 25                 | GOBP-SYNAPTIC-SIGNALING                           | GO-0099536    | 47   | 0.213272 | 1.085643 | 0.319149  | 1.000000  | 1.000      |  |
| 26                 | GOBP-POSITIVE-REGULATION_OF_PPTIDYL_TYROSINE...   | GO-0050731    | 8    | 0.387488 | 1.074784 | 0.347222  | 1.000000  | 1.000      |  |
| 27                 | GOBP-POSITIVE-REGULATION_OF_SECRETION             | GO-0051047    | 6    | 0.426829 | 1.074168 | 0.329218  | 1.000000  | 1.000      |  |
| 28                 | GOBP-REGULATION_OF_NEUROTRANSMITTER_TRANSPORT     | GO-0051588    | 6    | 0.414634 | 1.070534 | 0.334677  | 1.000000  | 1.000      |  |
| 29                 | GOBP-REGULATION_OF_METAL-ION_TRANSPORT            | GO-0010959    | 6    | 0.418551 | 1.069529 | 0.330645  | 1.000000  | 1.000      |  |
| 30                 | GOBP-ANION_TRANSMEMBRANE_TRANSPORT                | GO-0098656    | 7    | 0.380083 | 1.061942 | 0.352423  | 1.000000  | 1.000      |  |
| 31                 | GOBP-NEUROTRANSMITTER-SECRETION                   | GO-0007269    | 6    | 0.414634 | 1.054983 | 0.356364  | 1.000000  | 1.000      |  |
| 32                 | GOBP-LONG-TERM-SYNAPTIC-DEPRESSION                | GO-0060292    | 5    | 0.445783 | 1.053680 | 0.371901  | 1.000000  | 1.000      |  |
| 33                 | GOBP-GENERATION_OF_PRECURSOR_METABOLITES-AND-E... | GO-0006091    | 5    | 0.457831 | 1.052033 | 0.335766  | 1.000000  | 1.000      |  |
| 34                 | GOBP-REGULATION_OF_CATION_TRANSMEMBRANE_TRANSPORT | GO-1904062    | 16   | 0.276959 | 1.049990 | 0.356164  | 1.000000  | 1.000      |  |
| 35                 | GOBP-NEGATIVE-REGULATION_OF_PPTIDASE-ACTIVITY     | GO-0010466    | 6    | 0.413066 | 1.045760 | 0.354086  | 1.000000  | 1.000      |  |
| 36                 | GOBP-EXTRINSIC-APOPTOTIC-SIGNALING_PATHWAY        | GO-0097191    | 7    | 0.382716 | 1.045181 | 0.392405  | 1.000000  | 1.000      |  |
| 37                 | GOBP-REGULATION_OF_SYNAPTIC_TRANSMISSION-GLUTA... | GO-0051966    | 12   | 0.312473 | 1.040453 | 0.383648  | 1.000000  | 1.000      |  |
| 38                 | GOBP-REGULATION_OF_TRANSMEMBRANE_TRANSPORT        | GO-0034762    | 23   | 0.253381 | 1.036645 | 0.390805  | 1.000000  | 1.000      |  |
| 39                 | GOBP-ORGANIC-HYDROXY-COMPOUND_METABOLIC_PROCESS   | GO-1901615    | 7    | 0.376333 | 1.033767 | 0.400000  | 1.000000  | 1.000      |  |
| 40                 | GOBP-REGULATION_OF_SYNAPSE-STRUCTURE-OR-ACTIVITY  | GO-0050803    | 11   | 0.315907 | 1.031784 | 0.366013  | 1.000000  | 1.000      |  |

Continuation of Table S18

| NAME | ID                                                  | SIZE          | ES | NES      | NOM.p.val | FDR.q.val | FWER.p.val |
|------|-----------------------------------------------------|---------------|----|----------|-----------|-----------|------------|
| 41   | REACTOME_POST_TRANSLATIONAL_PROTEIN_MODIFICATION    | R-RNO-597592  | 7  | 0.382716 | 1.029434  | 0.403509  | 1.000000   |
| 42   | GOBP_NEGATIVE_REGULATION_OF_LOCOMOTION              | GO-0040013    | 5  | 0.437111 | 1.027291  | 0.364341  | 1.000000   |
| 43   | GOBP_PEPIDYL_TYROSINE_MODIFICATION                  | GO-0018212    | 10 | 0.323728 | 1.026020  | 0.421875  | 1.000000   |
| 44   | GOBP_MONOAMINE_TRANSPORT                            | GO-0015844    | 5  | 0.421678 | 0.995500  | 0.422481  | 1.000000   |
| 45   | GOBP_PROTEIN_KINASE_B_SIGNALING                     | GO-0043491    | 6  | 0.386692 | 0.990706  | 0.437247  | 1.000000   |
| 46   | GOBP_TRANSMEMBRANE_TRANSPORT                        | GO-0055085    | 27 | 0.226163 | 0.988514  | 0.500000  | 1.000000   |
| 47   | GOBP_DEVELOPMENTAL_MATURATION                       | GO-0021700    | 5  | 0.424817 | 0.975783  | 0.447876  | 1.000000   |
| 48   | GOBP_SYNAPTIC_TRANSMISSION_GLUTAMATERGIC            | GO-0035249    | 13 | 0.281411 | 0.971804  | 0.522988  | 1.000000   |
| 49   | GOBP_DENDRITIC_SPINE_DEVELOPMENT                    | GO-0060996    | 6  | 0.388227 | 0.964698  | 0.500000  | 1.000000   |
| 50   | GOBP_REGULATION_OF_EXTRINSIC_APOPTOTIC_SIGNALING... | GO-2001236    | 6  | 0.378049 | 0.947307  | 0.504202  | 1.000000   |
| 51   | GOBP_DENDRITE_MORPHOGENESIS                         | GO-0048813    | 6  | 0.374035 | 0.941670  | 0.523810  | 1.000000   |
| 52   | GOBP_DENDRITIC_SPINE_MORPHOGENESIS                  | GO-0060997    | 5  | 0.403918 | 0.925754  | 0.516605  | 1.000000   |
| 53   | GOBP_REGULATION_OF_MEMBRANE_POTENTIAL               | GO-0042391    | 17 | 0.239437 | 0.916956  | 0.571429  | 1.000000   |
| 54   | GOBP_PATERN_SPECIFICATION_PROCESS                   | GO-0007389    | 6  | 0.361926 | 0.909083  | 0.537778  | 1.000000   |
| 55   | GOBP_INORGANIC_ION_TRANSMEMBRANE_TRANSPORT          | GO-0098660    | 9  | 0.291581 | 0.904032  | 0.601010  | 1.000000   |
| 56   | REACTOME_ANTINFLAMMATORY_RESPONSE_FAVOURING...      | R-HSA-9662851 | 5  | 0.383721 | 0.897969  | 0.608163  | 1.000000   |
| 57   | GOBP_MORPHOGENESIS_OF_AN_EPITHELIUM                 | GO-0002009    | 6  | 0.348872 | 0.896994  | 0.628459  | 1.000000   |
| 58   | GOBP_REGIONALIZATION                                | GO-0003002    | 6  | 0.361926 | 0.895205  | 0.560484  | 1.000000   |
| 59   | GOBP_CATION_TRANSMEMBRANE_TRANSPORT                 | GO-0098655    | 18 | 0.224483 | 0.893480  | 0.661157  | 1.000000   |
| 60   | GOBP_REGULATION_OF_NMDA_RECEPTOR_ACTIVITY           | GO-2000310    | 10 | 0.282051 | 0.888327  | 0.632979  | 1.000000   |
| 61   | GOBP_REGULATION_OF_LONG_TERM_SYNAPTIC_POTENTIAL...  | GO-1900271    | 6  | 0.351370 | 0.879746  | 0.597561  | 1.000000   |
| 62   | GOBP_POSITIVE_REGULATION_OF_GLIOGENESIS             | GO-0014015    | 5  | 0.373494 | 0.872370  | 0.637631  | 1.000000   |
| 63   | GOBP_REGULATION_OF_GLIOGENESIS                      | GO-0014013    | 5  | 0.373494 | 0.868551  | 0.607930  | 1.000000   |
| 64   | GOBP_CALCIIUM_ION_TRANSMEMBRANE_TRANSPORT           | GO-0070588    | 7  | 0.311632 | 0.865025  | 0.653509  | 1.000000   |
| 65   | GOBP_TISSUE_MORPHOGENESIS                           | GO-0048729    | 7  | 0.315186 | 0.864055  | 0.646091  | 1.000000   |
| 66   | GOBP_REGULATION_OF_SIGNALING_RECEPTOR_ACTIVITY      | GO-0010469    | 14 | 0.243939 | 0.862282  | 0.680000  | 1.000000   |
| 67   | HALLMARK_ALLOGRAFT_REJECTION                        | M950          | 7  | 0.315448 | 0.854894  | 0.621005  | 1.000000   |
| 68   | GOBP_CYTOSOLIC_CALCIIUM_ION_TRANSPORT               | GO-0060401    | 7  | 0.311632 | 0.849554  | 0.656652  | 1.000000   |
| 69   | GOBP_GLIAL_CELL_DIFFERENTIATION                     | GO-0010001    | 10 | 0.264346 | 0.841469  | 0.668639  | 1.000000   |
| 70   | GOBP_SMOOTH_MUSCLE_CELL_PROLIFERATION               | GO-0048659    | 6  | 0.326512 | 0.834000  | 0.693023  | 1.000000   |
| 71   | GOBP_CALCIIUM_ION_TRANSPORT_INTO_CYTOSOL            | GO-0060402    | 7  | 0.311632 | 0.830171  | 0.652000  | 1.000000   |
| 72   | REACTOME_RAS_ACTIVATION_UPON_CA2_INFLUX_THROUGH...  | R-HSA-442982  | 6  | 0.317073 | 0.825116  | 0.681034  | 1.000000   |
| 73   | GOBP_PROTEIN_LOCALIZATION_TO_PLASMA_MEMBRANE        | GO-0072659    | 7  | 0.308642 | 0.825014  | 0.709544  | 1.000000   |
| 74   | GOBP_EMBRYO_DEVELOPMENT                             | GO-0009790    | 14 | 0.228986 | 0.824119  | 0.762431  | 1.000000   |
| 75   | GOBP_POSITIVE_REGULATION_OF_NERVOUS_SYSTEM_DEV...   | GO-0051962    | 12 | 0.239554 | 0.824112  | 0.718563  | 1.000000   |
| 76   | GOBP_REGULATION_OF_VASCULAR_ASSOCIATED_SMOOTH...    | GO-1904705    | 5  | 0.347794 | 0.821874  | 0.705454  | 1.000000   |
| 77   | GOBP_POSITIVE_REGULATION_OF_LONG_TERM_SYNAPTIC...   | GO-1900273    | 5  | 0.359789 | 0.814904  | 0.689139  | 1.000000   |
| 78   | GOBP_GLIOGENESIS                                    | GO-0042063    | 12 | 0.235990 | 0.802063  | 0.760234  | 1.000000   |
| 79   | GOBP_REGULATION_OF_POSTSYNAPTIC_MEMBRANE_POTEN...   | GO-0060078    | 14 | 0.229730 | 0.801394  | 0.760479  | 1.000000   |
| 80   | GOBP_POSITIVE_REGULATION_OF_NEUROGENESIS            | GO-0050769    | 12 | 0.239546 | 0.800818  | 0.722628  | 1.000000   |
| 81   | GOBP_EPITHELIAL_CELL_DIFFERENTIATION                | GO-0030855    | 7  | 0.298946 | 0.799980  | 0.746835  | 1.000000   |
| 82   | GOBP_POSITIVE_REGULATION_OF_CELL_DEVELOPMENT        | GO-0010720    | 12 | 0.239554 | 0.799867  | 0.737143  | 1.000000   |
| 83   | GOBP_REGULATION_OF_ANION_TRANSMEMBRANE_TRANSPORT    | GO-1903959    | 5  | 0.337733 | 0.799748  | 0.759398  | 1.000000   |

Continuation of Table S18

| NAME | ID                                                | SIZE | ES       | NES      | NOM.p.val | FDR.q.val | FWER.p.val |
|------|---------------------------------------------------|------|----------|----------|-----------|-----------|------------|
| 84   | GOBP-POSITIVE-REGULATION_OF_NEURON-PROJECTION...  | 5    | 0.348753 | 0.794252 | 0.796296  | 1.000000  | 1.000      |
| 85   | GOBP-POSITIVE-REGULATION_OF_LEUKOCYTE-CELL-CEL... | 5    | 0.337349 | 0.784630 | 0.805447  | 1.000000  | 1.000      |
| 86   | GOBP-POSITIVE-REGULATION_OF_CELL-CELL-ADHESION    | 5    | 0.337349 | 0.784565 | 0.810606  | 1.000000  | 1.000      |
| 87   | GOBP-REGULATION_OF_PROTEIN-CATABOLIC-PROCESS      | 7    | 0.281888 | 0.782932 | 0.778261  | 1.000000  | 1.000      |
| 88   | GOBP-SIGNAL-RELEASE                               | 14   | 0.212320 | 0.775929 | 0.848485  | 1.000000  | 1.000      |
| 89   | GOBP-REGULATION_OF_POSTSYNAPSE-ORGANIZATION       | 6    | 0.297679 | 0.775893 | 0.838057  | 1.000000  | 1.000      |
| 90   | GOBP-DIVALENT-INORGANIC-CATION-HOMEOSTASIS        | 13   | 0.226667 | 0.765988 | 0.764706  | 1.000000  | 1.000      |
| 91   | GOBP-REGULATION_OF_CYTOSOLIC-CALCIUM-ION-CONCE... | 13   | 0.226667 | 0.764472 | 0.826667  | 1.000000  | 1.000      |
| 92   | REACTOME-EPHLEPHRIN-SIGNALING                     | 6    | 0.304878 | 0.763666 | 0.828947  | 1.000000  | 1.000      |
| 93   | GOBP-REGULATION_OF_PHOSPHOLIPASE-ACTIVITY         | 6    | 0.291749 | 0.761602 | 0.832618  | 1.000000  | 1.000      |
| 94   | REACTOME-SIGNALING-BY-NTRK2-TRKB                  | 6    | 0.301961 | 0.760647 | 0.797571  | 1.000000  | 1.000      |
| 95   | GOBP-SYNAPSE-ORGANIZATION                         | 17   | 0.204680 | 0.756041 | 0.842520  | 1.000000  | 1.000      |
| 96   | GOBP-METAL-ION-TRANSPORT                          | 11   | 0.222583 | 0.755444 | 0.808989  | 1.000000  | 1.000      |
| 97   | GOBP-REGULATION_OF_PHOSPHOLIPASE-C-ACTIVITY       | 5    | 0.318083 | 0.754633 | 0.829545  | 1.000000  | 1.000      |
| 98   | GOBP-POSITIVE-REGULATION_OF_LIPASE-ACTIVITY       | 5    | 0.318083 | 0.752016 | 0.809160  | 1.000000  | 1.000      |
| 99   | GOBP-CATION-TRANSPORT                             | 25   | 0.169638 | 0.746098 | 0.855422  | 1.000000  | 1.000      |
| 100  | GOBP-REGULATION_OF_PROTEIN-TYROSINE-KINASE-ACT... | 5    | 0.316145 | 0.739822 | 0.830777  | 1.000000  | 1.000      |
| 101  | GOBP-TELENCEPHALON-DEVELOPMENT                    | 6    | 0.292683 | 0.737821 | 0.836134  | 1.000000  | 1.000      |
| 102  | GOBP-CALCIUM-ION-TRANSPORT                        | 11   | 0.222583 | 0.733632 | 0.852041  | 1.000000  | 1.000      |
| 103  | HALLMARK-KRAS-SIGNALING-UP                        | 6    | 0.292720 | 0.729363 | 0.825726  | 1.000000  | 1.000      |
| 104  | GOBP-REGULATION_OF_LIPASE-ACTIVITY                | 6    | 0.291749 | 0.726278 | 0.859575  | 1.000000  | 1.000      |
| 105  | GOBP-POSITIVE-REGULATION_OF_PROTEIN-TYROSINE-K... | 5    | 0.316145 | 0.717369 | 0.877863  | 1.000000  | 1.000      |
| 106  | GOBP-REGULATION_OF-ANATOMICAL-STRUCTURE-SIZE      | 10   | 0.230769 | 0.716076 | 0.865285  | 1.000000  | 1.000      |
| 107  | GOBP-CHEMICAL-SYNAPTIC-TRANSMISSION_POSTSYNAPTIC  | 9    | 0.240506 | 0.715221 | 0.861386  | 1.000000  | 1.000      |
| 108  | HALLMARK-APOPTOSIS                                | 6    | 0.287659 | 0.713471 | 0.861905  | 1.000000  | 1.000      |
| 109  | GOBP-NEGATIVE-REGULATION_OF-CATABOLIC-PROCESS     | 8    | 0.248459 | 0.701080 | 0.873096  | 1.000000  | 1.000      |
| 110  | GOBP-NEURON-MIGRATION                             | 5    | 0.298133 | 0.699933 | 0.875000  | 1.000000  | 1.000      |
| 111  | GOBP-AMYLOID-BETA-METABOLIC-PROCESS               | 5    | 0.289157 | 0.693705 | 0.902985  | 1.000000  | 1.000      |
| 112  | GOBP-ORGANIC-ACID-TRANSPORT                       | 7    | 0.259259 | 0.693472 | 0.918803  | 1.000000  | 1.000      |
| 113  | GOBP-EPHRIN-RECEPTOR-SIGNALING-PATHWAY            | 5    | 0.301205 | 0.692274 | 0.870722  | 1.000000  | 1.000      |
| 114  | GOBP-NEGATIVE-REGULATION_OF-IMMUNE-SYSTEM-PROCESS | 5    | 0.292511 | 0.686598 | 0.910156  | 1.000000  | 1.000      |
| 115  | GOBP-AMYLOID-PRECURSOR-PROTEIN-CATABOLIC-PROCESS  | 5    | 0.289157 | 0.674389 | 0.921162  | 1.000000  | 1.000      |
| 116  | GOBP-AMYLOID-PRECURSOR-PROTEIN-METABOLIC-PROCESS  | 5    | 0.289157 | 0.671919 | 0.912281  | 1.000000  | 1.000      |
| 117  | GOBP-REGULATION_OF-NEUROTRANSMITTER-RECEPTOR-A... | 13   | 0.186667 | 0.670323 | 0.946746  | 1.000000  | 1.000      |
| 118  | GOBP-REGULATION_OF-CATION-CHANNEL-ACTIVITY        | 14   | 0.189189 | 0.662374 | 0.935065  | 1.000000  | 1.000      |
| 119  | GOBP-AMINO-ACID-TRANSPORT                         | 6    | 0.256098 | 0.648466 | 0.946154  | 1.000000  | 1.000      |
| 120  | GOBP-CARBOXYLIC-ACID-TRANSPORT                    | 6    | 0.256098 | 0.635214 | 0.956863  | 1.000000  | 1.000      |
| 121  | GOBP-NEURON-PROJECTION-ORGANIZATION               | 8    | 0.210602 | 0.634519 | 0.965812  | 1.000000  | 1.000      |
| 122  | GOBP-BIOLOGICAL-ADHESION                          | 19   | 0.166682 | 0.627984 | 0.982301  | 1.000000  | 1.000      |
| 123  | GOBP-ORGANIC-ANION-TRANSPORT                      | 6    | 0.260698 | 0.617411 | 0.968000  | 1.000000  | 1.000      |
| 124  | GOBP-ACTIN-FILAMENT-BASED-PROCESS                 | 7    | 0.222222 | 0.612260 | 0.942478  | 1.000000  | 1.000      |
| 125  | GOBP-POSTSYNAPSE-ORGANIZATION                     | 10   | 0.191677 | 0.603822 | 0.972527  | 1.000000  | 1.000      |
| 126  | GOBP-REGULATION_OF_NERVOUS-SYSTEM-PROCESS         | 8    | 0.201793 | 0.577702 | 0.985222  | 0.999113  | 1.000      |

Continuation of Table S18

| NAME | ID                                                | SIZE | ES        | NES       | NOM.p.val | FDR.q.val | FWER.p.val |
|------|---------------------------------------------------|------|-----------|-----------|-----------|-----------|------------|
| 127  | GOBP-REGULATION-OF-PROTEIN-LOCALIZATION-TO-CEL... | 6    | 0.222314  | 0.552862  | 0.991803  | 0.998223  | 1.000      |
| 128  | GOBP-REGULATION-OF-PROTEIN-LOCALIZATION-TO-MEM... | 7    | 0.198703  | 0.531375  | 0.995745  | 0.994638  | 1.000      |
| 129  | GOBP-STRIATED-MUSCLE-CELL-DIFFERENTIATION         | 9    | -0.193886 | -0.450544 | 0.993703  | 0.996086  | 1.000      |
| 130  | GOBP-REGULATION-OF-SYSTEM-PROCESS                 | 18   | -0.172399 | -0.467421 | 0.991842  | 0.995836  | 1.000      |
| 131  | GOBP-CELL-JUNCTION-ORGANIZATION                   | 19   | -0.174643 | -0.476901 | 0.982778  | 0.996045  | 1.000      |
| 132  | GOBP-REGULATION-OF-SECRETION                      | 14   | -0.197071 | -0.507269 | 0.980347  | 0.991733  | 1.000      |
| 133  | GOBP-NEGATIVE-REGULATION-OF-TRANSMEMBRANE-TRAN... | 6    | -0.247119 | -0.508387 | 0.985526  | 0.993150  | 1.000      |
| 134  | GOBP-NEGATIVE-REGULATION-OF-ANION-TRANSPORT       | 8    | -0.229170 | -0.516100 | 0.982301  | 0.992868  | 1.000      |
| 135  | GOBP-NEUROGENESIS                                 | 40   | -0.172650 | -0.525990 | 0.969116  | 0.991707  | 1.000      |
| 136  | GOBP-POSITIVE-REGULATION-OF-CELL-PROJECTION_OR... | 10   | -0.223183 | -0.532551 | 0.974201  | 0.991232  | 1.000      |
| 137  | GOBP-LIPID-EXPORT-FROM-CELL                       | 5    | -0.277850 | -0.543986 | 0.991946  | 0.988855  | 1.000      |
| 138  | GOBP-REGULATION-OF-NERVOUS-SYSTEM-DEVELOPMENT     | 15   | -0.203369 | -0.555603 | 0.954076  | 0.985927  | 1.000      |
| 139  | GOBP-REGULATION-OF-CELL-DEVELOPMENT               | 15   | -0.210868 | -0.556547 | 0.963006  | 0.987243  | 1.000      |
| 140  | GOBP-ORGANONITROGEN-COMPOUND-CATABOLIC-PROCESS    | 9    | -0.240705 | -0.557480 | 0.974328  | 0.985560  | 1.000      |
| 141  | GOBP-CELLULAR-AMIDE-METABOLIC-PROCESS             | 13   | -0.219976 | -0.561018 | 0.949701  | 0.987799  | 1.000      |
| 142  | GOBP-PROTEIN-PHOSPHORYLATION                      | 7    | -0.259362 | -0.561054 | 0.971286  | 0.990497  | 1.000      |
| 143  | GOBP-DEPHOSPHORYLATION                            | 7    | -0.259362 | -0.566792 | 0.967363  | 0.989674  | 1.000      |
| 144  | GOBP-ION-HOMEOSTASIS                              | 16   | -0.220759 | -0.578842 | 0.949425  | 0.985556  | 1.000      |
| 145  | GOBP-PEPTIDE-METABOLIC-PROCESS                    | 12   | -0.228444 | -0.579699 | 0.945783  | 0.986823  | 1.000      |
| 146  | GOBP-REGULATION-OF-NEUROGENESIS                   | 14   | -0.225653 | -0.581275 | 0.950178  | 0.987651  | 1.000      |
| 147  | GOBP-POSITIVE-REGULATION-OF-HYDROLASE-ACTIVITY    | 16   | -0.220654 | -0.581678 | 0.957176  | 0.989182  | 1.000      |
| 148  | GOBP-CIRCULATORY-SYSTEM-PROCESS                   | 5    | -0.293884 | -0.586455 | 0.961379  | 0.988360  | 1.000      |
| 149  | GOBP-ADENYLATE-CYCLASE-INHIBITING-G-PROTEIN_CO... | 5    | -0.296749 | -0.586690 | 0.975477  | 0.989960  | 1.000      |
| 150  | GOBP-FATTY-ACID-TRANSPORT                         | 6    | -0.286086 | -0.588928 | 0.953333  | 0.990332  | 1.000      |
| 151  | GOBP-DENDRITE-DEVELOPMENT                         | 9    | -0.253643 | -0.590114 | 0.948466  | 0.991353  | 1.000      |
| 152  | GOBP-REGULATION-OF-CELLULAR-COMPONENT-BIOGENESIS  | 10   | -0.254006 | -0.593447 | 0.941919  | 0.991163  | 1.000      |
| 153  | REACTOME-TRANSCRIPTIONAL-REGULATION-BY-MECP2      | 7    | -0.271605 | -0.596366 | 0.951838  | 0.991160  | 1.000      |
| 154  | GOBP-SKIN-DEVELOPMENT                             | 5    | -0.306130 | -0.599186 | 0.965326  | 0.991159  | 1.000      |
| 155  | GOBP-CELL-CELL-SIGNALING                          | 56   | -0.200858 | -0.605848 | 0.929240  | 0.988675  | 1.000      |
| 156  | GOBP-PROTEIN-CATABOLIC-PROCESS                    | 8    | -0.265234 | -0.607355 | 0.944374  | 0.989458  | 1.000      |
| 157  | GOBP-ASSOCIATIVE-LEARNING                         | 7    | -0.282554 | -0.611691 | 0.958442  | 0.988355  | 1.000      |
| 158  | GOBP-SECOND-MESSENGER-MEDIATED-SIGNALING          | 16   | -0.230918 | -0.613348 | 0.931634  | 0.989010  | 1.000      |
| 159  | GOBP-MITOCHONDRION-ORGANIZATION                   | 7    | -0.283342 | -0.614331 | 0.954068  | 0.990113  | 1.000      |
| 160  | GOBP-PROTEIN-CONTAINING-COMPLEX-SUBUNIT_ORGANI... | 14   | -0.237607 | -0.620384 | 0.928489  | 0.987466  | 1.000      |
| 161  | GOBP-DICARBOXYLIC-ACID-TRANSPORT                  | 5    | -0.320166 | -0.622395 | 0.931081  | 0.987843  | 1.000      |
| 162  | GOBP-MONOCARBOXYLIC-ACID-TRANSPORT                | 5    | -0.320166 | -0.628881 | 0.952957  | 0.984885  | 1.000      |
| 163  | GOBP-PEPTIDE-SECRETION                            | 9    | -0.268755 | -0.629794 | 0.916250  | 0.985992  | 1.000      |
| 164  | GOBP-RESPONSE-TO-ACID-CHEMICAL                    | 6    | -0.301644 | -0.632268 | 0.918314  | 0.986058  | 1.000      |
| 165  | GOBP-ADENYLATE-CYCLASE-INHIBITING-G-PROTEIN_CO... | 9    | -0.275620 | -0.636440 | 0.915276  | 0.984598  | 1.000      |
| 166  | GOBP-ACIDIC-AMINO-ACID-TRANSPORT                  | 5    | -0.320166 | -0.637038 | 0.940781  | 0.985917  | 1.000      |
| 167  | GOBP-POSITIVE-REGULATION-OF-SYNAPTIC-TRANSMISSION | 15   | -0.244579 | -0.640077 | 0.914520  | 0.985308  | 1.000      |
| 168  | GOBP-REGULATION-OF-TRANSPORTER-ACTIVITY           | 17   | -0.239102 | -0.642434 | 0.905512  | 0.985183  | 1.000      |
| 169  | GOBP-CARBOHYDRATE-DERIVATIVE-METABOLIC-PROCESS    | 7    | -0.298604 | -0.644311 | 0.924552  | 0.985458  | 1.000      |

Continuation of Table S18

| NAME                                                       | ID            | SIZE | ES        | NES       | NOM.p.val | FDR.q.val | FWER.p.val |
|------------------------------------------------------------|---------------|------|-----------|-----------|-----------|-----------|------------|
| 170 REACTOME_INTERLEUKIN_4_AND_INTERLEUKIN_13_SIGNALING... | R-RNO-6785807 | 8    | -0.283977 | -0.645245 | 0.922597  | 0.986452  | 1.000      |
| 171 GOBP_METAL_ION_HOMEOSTASIS                             | GO-0055065    | 14   | -0.250432 | -0.646316 | 0.902074  | 0.987338  | 1.000      |
| 172 GOBP_POSITIVE_REGULATION_OF_CELLULAR_COMPONENT...      | GO-0044089    | 9    | -0.280358 | -0.650148 | 0.911250  | 0.985935  | 1.000      |
| 173 GOBP_REGULATION_OF_HYDROLASE_ACTIVITY                  | GO-0051336    | 22   | -0.229194 | -0.651949 | 0.885301  | 0.986164  | 1.000      |
| 174 GOBP_REGULATION_OF_PEPIDYL_SERINE_PHOSPHORYLA...       | GO-0033135    | 8    | -0.289440 | -0.655576 | 0.912769  | 0.984907  | 1.000      |
| 175 GOBP_POSITIVE_REGULATION_OF_PEPIDYL_SERINE_PH...       | GO-0033138    | 8    | -0.289440 | -0.655576 | 0.912769  | 0.984907  | 1.000      |
| 176 GOBP_REGULATION_OF_NEURON_PROJECTION_DEVELOPMENT       | GO-0010975    | 16   | -0.249055 | -0.663219 | 0.892236  | 0.981600  | 1.000      |
| 177 GOBP_HORMONE_TRANSPORT                                 | GO-0009914    | 9    | -0.286605 | -0.665599 | 0.878079  | 0.981199  | 1.000      |
| 178 REACTOME_DAG_AND_IP3_SIGNALING                         | R-RNO-1489509 | 8    | -0.295281 | -0.665896 | 0.908755  | 0.982772  | 1.000      |
| 179 GOBP_CELLULAR_ION_HOMEOSTASIS                          | GO-0006873    | 14   | -0.257362 | -0.665943 | 0.878394  | 0.984546  | 1.000      |
| 180 GOBP_NEURON_DIFFERENTIATION                            | GO-0030182    | 36   | -0.225736 | -0.666950 | 0.905782  | 0.985438  | 1.000      |
| 181 GOBP_NEURON_DEVELOPMENT                                | GO-0048666    | 33   | -0.225949 | -0.670011 | 0.896368  | 0.984431  | 1.000      |
| 182 GOBP_LEUKOCYTE_CELL_ADHESION                           | GO-0007159    | 6    | -0.319552 | -0.675286 | 0.911023  | 0.981105  | 1.000      |
| 183 GOBP_NEGATIVE_REGULATION_OF_PROTEIN_CATABOLIC...       | GO-0042177    | 5    | -0.340745 | -0.675607 | 0.909934  | 0.982634  | 1.000      |
| 184 GOBP_POSITIVE_REGULATION_OF_CELL_ADHESION              | GO-0045785    | 7    | -0.313810 | -0.677726 | 0.902622  | 0.982364  | 1.000      |
| 185 REACTOME_ASSEMBLY_AND_CELL_SURFACE_PRESENTATIO...      | R-RNO-9609736 | 8    | -0.306355 | -0.679803 | 0.883895  | 0.982143  | 1.000      |
| 186 GOBP_REGULATION_OF_HORMONE_SECRETION                   | GO-0046883    | 8    | -0.297974 | -0.681255 | 0.886650  | 0.982428  | 1.000      |
| 187 GOBP_PROTEIN_LOCALIZATION_TO_MEMBRANE                  | GO-0072657    | 14   | -0.260992 | -0.683930 | 0.867731  | 0.981563  | 1.000      |
| 188 GOBP_INSULIN_SECRETION                                 | GO-0030073    | 7    | -0.319996 | -0.688753 | 0.866841  | 0.978463  | 1.000      |
| 189 GOBP_REGULATION_OF_PEPIDE_HORMONE_SECRETION            | GO-0090276    | 6    | -0.333844 | -0.690467 | 0.865591  | 0.978424  | 1.000      |
| 190 GOBP_MUSCLE_CELL_PROLIFERATION                         | GO-0033002    | 8    | -0.307317 | -0.691654 | 0.861935  | 0.979046  | 1.000      |
| 191 GOBP_LIPID_LOCALIZATION                                | GO-0010876    | 10   | -0.293993 | -0.691669 | 0.869148  | 0.980880  | 1.000      |
| 192 GOBP_CELL_JUNCTION_ASSEMBLY                            | GO-0034329    | 8    | -0.309910 | -0.692878 | 0.888889  | 0.981458  | 1.000      |
| 193 GOBP_CELLULAR_RESPONSE_TO_ALCOHOL                      | GO-0097306    | 5    | -0.355466 | -0.694041 | 0.889972  | 0.982078  | 1.000      |
| 194 REACTOME_NEGATIVE_REGULATION_OF_NMDA_RECEPTOR...       | R-HSA-961732  | 8    | -0.306355 | -0.694702 | 0.875312  | 0.983265  | 1.000      |
| 195 GOBP_CELL_CELL_ADHESION                                | GO-0098609    | 14   | -0.271572 | -0.695653 | 0.861111  | 0.984088  | 1.000      |
| 196 GOBP_REGULATION_OF_TRANS_SYNAPTIC_SIGNALING            | GO-0099177    | 40   | -0.228364 | -0.698575 | 0.864693  | 0.982972  | 1.000      |
| 197 GOBP_REGULATION_OF_MAP_KINASE_ACTIVITY                 | GO-0043405    | 9    | -0.294355 | -0.699447 | 0.851485  | 0.983886  | 1.000      |
| 198 REACTOME_SYNAPTIC_ADHESION LIKE MOLECULES              | R-RNO-8849932 | 9    | -0.309940 | -0.704381 | 0.864030  | 0.980168  | 1.000      |
| 199 GOBP_EPIDERMIS_DEVELOPMENT                             | GO-0008544    | 5    | -0.357499 | -0.705539 | 0.878146  | 0.980728  | 1.000      |
| 200 GOBP_PEPIDE_HORMONE_SECRETION                          | GO-0030072    | 7    | -0.319996 | -0.706593 | 0.865359  | 0.981415  | 1.000      |
| 201 GOBP_MUSCLE_CELL_DEVELOPMENT                           | GO-0055001    | 5    | -0.358724 | -0.707120 | 0.872801  | 0.982723  | 1.000      |
| 202 GOBP_REGULATION_OF_PEPIDE_SECRETION                    | GO-0002791    | 7    | -0.322934 | -0.710476 | 0.868594  | 0.980845  | 1.000      |
| 203 REACTOME_DEVELOPMENTAL BIOLOGY                         | R-RNO-1266738 | 23   | -0.248339 | -0.711282 | 0.846847  | 0.981836  | 1.000      |
| 204 GOBP_REGULATION_OF_CELL_ADHESION                       | GO-0030155    | 13   | -0.281693 | -0.715923 | 0.861575  | 0.978361  | 1.000      |
| 205 GOBP_CELL_SURFACE_RECEPTOR_SIGNALING_PATHWAY_I...      | GO-1905114    | 15   | -0.280164 | -0.716640 | 0.842410  | 0.979387  | 1.000      |
| 206 GOBP_PROTEIN_LOCALIZATION_TO_CELL_PERIPHERY            | GO-1990778    | 12   | -0.287609 | -0.717736 | 0.817073  | 0.979912  | 1.000      |
| 207 GOBP_ACTIVATION_OF_PROTEIN_KINASE_ACTIVITY             | GO-0032147    | 11   | -0.292900 | -0.721006 | 0.819036  | 0.978002  | 1.000      |
| 208 GOBP_NEGATIVE_REGULATION_OF_PROTEOLYSIS                | GO-0045861    | 8    | -0.319944 | -0.721914 | 0.841495  | 0.978841  | 1.000      |
| 209 REACTOME_ACTIVATION_OF_NMDA_RECEPTORS_AND_POST...      | R-RNO-442755  | 16   | -0.277294 | -0.728393 | 0.819840  | 0.973131  | 1.000      |
| 210 REACTOME_CLASS_C_3_METABOTROPIC_GLUTAMATE_PHER...      | R-RNO-420499  | 7    | -0.335924 | -0.729184 | 0.856579  | 0.974083  | 1.000      |
| 211 GOBP_CELL_PROJECTION_ORGANIZATION                      | GO-0030030    | 34   | -0.245045 | -0.730975 | 0.841202  | 0.973709  | 1.000      |
| 212 GOBP_REGULATION_OF_TRANSPORT                           | GO-0051049    | 44   | -0.243744 | -0.732220 | 0.834547  | 0.974001  | 1.000      |



Continuation of Table S18

| NAME | ID                                                | SIZE | ES        | NES       | NOM.p.val | FDR.q.val | FWER.p.val |
|------|---------------------------------------------------|------|-----------|-----------|-----------|-----------|------------|
| 213  | GOBP-NEGATIVE-REGULATION-OF-APOPTOTIC-SIGNALIN... | 7    | -0.336986 | -0.735430 | 0.849333  | 0.971962  | 1.000      |
| 214  | GOBP-CELL-CELL-JUNCTION-ORGANIZATION              | 6    | -0.353998 | -0.739752 | 0.856369  | 0.968332  | 1.000      |
| 215  | GOBP-CELLULAR-COMPONENT-DISASSEMBLY               | 6    | -0.358087 | -0.740828 | 0.822517  | 0.968903  | 1.000      |
| 216  | REACTOME-LONG-TERM-POTENTIATION                   | 10   | -0.308754 | -0.741850 | 0.817848  | 0.969468  | 1.000      |
| 217  | GOBP-NEGATIVE-REGULATION-OF-CELL-CYCLE            | 5    | -0.371225 | -0.746387 | 0.843490  | 0.965306  | 1.000      |
| 218  | GOBP-NEGATIVE-REGULATION-OF-TRANSPORT             | 13   | -0.299604 | -0.755241 | 0.831982  | 0.955444  | 1.000      |
| 219  | GOBP-COGNITION                                    | 28   | -0.257377 | -0.755861 | 0.797400  | 0.956504  | 1.000      |
| 220  | REACTOME-GPCR-LIGAND-BINDING                      | 8    | -0.335623 | -0.756539 | 0.807789  | 0.957473  | 1.000      |
| 221  | GOBP-LONG-TERM-MEMORY                             | 6    | -0.367677 | -0.756970 | 0.831117  | 0.958827  | 1.000      |
| 222  | GOBP-MEMBRANE-PROTEIN-PROTEOLYSIS                 | 6    | -0.370276 | -0.757663 | 0.822997  | 0.959841  | 1.000      |
| 223  | GOBP-AMIDE-BIOSYNTHETIC-PROCESS                   | 7    | -0.351409 | -0.760924 | 0.809403  | 0.957247  | 1.000      |
| 224  | REACTOME-MAPK-FAMILY-SIGNALING-CASCADES           | 12   | -0.274160 | -0.766607 | 0.789354  | 0.953140  | 1.000      |
| 225  | GOBP-REGULATION-OF-CELL-PROJECTION-ORGANIZATION   | 20   | -0.357044 | -0.767682 | 0.803364  | 0.953624  | 1.000      |
| 226  | GOBP-ORGANOPHOSPHATE-METABOLIC-PROCESS            | 7    | -0.357044 | -0.767682 | 0.803364  | 0.953624  | 1.000      |
| 227  | REACTOME-UNBLOCKING-OF-NMDA-RECEPTORS-GLUTAMAT... | 12   | -0.312925 | -0.767774 | 0.801921  | 0.954432  | 1.000      |
| 228  | GOBP-PEPTIDE-BIOSYNTHETIC-PROCESS                 | 7    | -0.351409 | -0.775069 | 0.794308  | 0.946976  | 1.000      |
| 229  | GOBP-SECRETION                                    | 24   | -0.271511 | -0.776448 | 0.790466  | 0.946980  | 1.000      |
| 230  | GOBP-REGULATION-OF-CELLULAR-AMIDE-METABOLIC-PR... | 9    | -0.335781 | -0.780293 | 0.790932  | 0.943343  | 1.000      |
| 231  | REACTOME-NERVOUS-SYSTEM-DEVELOPMENT               | 15   | -0.301423 | -0.782444 | 0.796296  | 0.941063  | 1.000      |
| 232  | GOBP-EXCITATORY-CHEMICAL-SYNAPTIC-TRANSMISSION    | 5    | -0.390909 | -0.783407 | 0.790368  | 0.942759  | 1.000      |
| 233  | GOBP-CELL-MORPHOGENESIS                           | 24   | -0.277341 | -0.785549 | 0.789130  | 0.941600  | 1.000      |
| 234  | GOBP-REGULATION-OF-SYNAPTIC-PLASTICITY            | 21   | -0.276833 | -0.786668 | 0.771271  | 0.941844  | 1.000      |
| 235  | GOBP-MEMORY                                       | 13   | -0.308508 | -0.786725 | 0.750296  | 0.943711  | 1.000      |
| 236  | GOBP-REGULATION-OF-INFLAMMATORY-RESPONSE          | 7    | -0.365516 | -0.789266 | 0.755442  | 0.941935  | 1.000      |
| 237  | GOBP-REGULATION-OF-PROTEIN-MODIFICATION-PROCESS   | 29   | -0.266413 | -0.789312 | 0.760087  | 0.943819  | 1.000      |
| 238  | GOBP-SMALL-GTPASE-MEDIATED-SIGNAL-TRANSDUCTION    | 8    | -0.350595 | -0.789430 | 0.772953  | 0.945597  | 1.000      |
| 239  | GOBP-GAMETE-GENERATION                            | 9    | -0.339026 | -0.790113 | 0.764115  | 0.946562  | 1.000      |
| 240  | GOBP-CELL-PART-MORPHOGENESIS                      | 24   | -0.277341 | -0.790308 | 0.766703  | 0.948243  | 1.000      |
| 241  | GOBP-CELLULAR-COMPONENT-MORPHOGENESIS             | 24   | -0.277341 | -0.791355 | 0.783814  | 0.948707  | 1.000      |
| 242  | GOBP-REGULATION-OF-DEFENSE-RESPONSE               | 7    | -0.365516 | -0.792119 | 0.761528  | 0.949491  | 1.000      |
| 243  | GOBP-REGULATION-OF-CATABOLIC-PROCESS              | 13   | -0.308806 | -0.792138 | 0.751790  | 0.951452  | 1.000      |
| 244  | GOBP-LEARNING                                     | 13   | -0.315778 | -0.793315 | 0.757757  | 0.951690  | 1.000      |
| 245  | GOBP-REGULATION-OF-VESICLE-MEDIATED-TRANSPORT     | 12   | -0.317547 | -0.795673 | 0.755924  | 0.949953  | 1.000      |
| 246  | REACTOME-TRANSCRIPTIONAL-REGULATION-OF-WHITE-A... | 6    | -0.379745 | -0.796041 | 0.764398  | 0.951452  | 1.000      |
| 247  | GOBP-POSITIVE-REGULATION-OF-DEFENSE-RESPONSE      | 5    | -0.401263 | -0.798473 | 0.799180  | 0.949814  | 1.000      |
| 248  | GOBP-POSITIVE-REGULATION-OF-PHOSPHATIDYLINOSIT... | 5    | -0.404513 | -0.799418 | 0.769022  | 0.950426  | 1.000      |
| 249  | REACTOME-SIGNALING-BY-INTERLEUKINS                | 15   | -0.308748 | -0.801534 | 0.762791  | 0.949333  | 1.000      |
| 250  | GOBP-POSITIVE-REGULATION-OF-MAP-KINASE-ACTIVITY   | 6    | -0.389175 | -0.802827 | 0.768246  | 0.949300  | 1.000      |
| 251  | GOBP-PROTEIN-LOCALIZATION-TO-CELL-JUNCTION        | 6    | -0.384957 | -0.803630 | 0.764554  | 0.950121  | 1.000      |
| 252  | GOBP-POLYSACCHARIDE-METABOLIC-PROCESS             | 5    | -0.407891 | -0.804296 | 0.759891  | 0.951130  | 1.000      |
| 253  | GOBP-PROTEOLYSIS                                  | 17   | -0.296938 | -0.805342 | 0.739380  | 0.951605  | 1.000      |
| 254  | GOBP-CELL-CELL-JUNCTION-ASSEMBLY                  | 5    | -0.411711 | -0.805352 | 0.763305  | 0.953634  | 1.000      |
| 255  | GOBP-ACTIVATION-OF-MAPK-ACTIVITY                  | 6    | -0.389175 | -0.807223 | 0.751989  | 0.952631  | 1.000      |

Continuation of Table S18

| NAME | ID                                                | SIZE | ES        | NES       | NOM.p.val | FDR.q.val | FWER.p.val |
|------|---------------------------------------------------|------|-----------|-----------|-----------|-----------|------------|
| 256  | GOBP-REGULATION-OF-PROTEIN-PHOSPHORYLATION        | 26   | -0.278752 | -0.812441 | 0.740331  | 0.946535  | 1.000      |
| 257  | GOBP-REGULATION-OF-INTRACELLULAR-SIGNAL-TRANSD... | 21   | -0.293087 | -0.817928 | 0.728285  | 0.939690  | 1.000      |
| 258  | GOBP-NEGATIVE-REGULATION-OF-ION-TRANSPORT         | 11   | -0.335574 | -0.819094 | 0.709070  | 0.939871  | 1.000      |
| 259  | GOBP-MACROMOLECULE-CATABOLIC-PROCESS              | 12   | -0.323257 | -0.823257 | 0.719812  | 0.935144  | 1.000      |
| 260  | GOBP-ORGANONITROGEN-COMPOUND-BIOSYNTHETIC-PROCESS | 13   | -0.323550 | -0.826726 | 0.713951  | 0.931513  | 1.000      |
| 261  | GOBP-RESPIRATORY-SYSTEM-DEVELOPMENT               | 6    | -0.393648 | -0.827205 | 0.752604  | 0.932752  | 1.000      |
| 262  | GOBP-CELL-MORPHOGENESIS-INVOLVED-IN-NEURON-DIF... | 21   | -0.295704 | -0.827959 | 0.709030  | 0.933445  | 1.000      |
| 263  | GOBP-POSITIVE-REGULATION-OF-CATALYTIC-ACTIVITY    | 30   | -0.285548 | -0.831598 | 0.726681  | 0.929525  | 1.000      |
| 264  | GOBP-FOREBRAIN-DEVELOPMENT                        | 9    | -0.357521 | -0.832151 | 0.706897  | 0.930642  | 1.000      |
| 265  | GOBP-SEXUAL-REPRODUCTION                          | 10   | -0.352724 | -0.834845 | 0.713759  | 0.928004  | 1.000      |
| 266  | GOBP-RESPONSE-TO-ALCOHOL                          | 11   | -0.347850 | -0.838036 | 0.715651  | 0.924741  | 1.000      |
| 267  | GOBP-POSITIVE-REGULATION-OF-MOLECULAR-FUNCTION    | 38   | -0.279474 | -0.839183 | 0.722103  | 0.924795  | 1.000      |
| 268  | GOBP-GLUCOSE-METABOLIC-PROCESS                    | 6    | -0.402487 | -0.840461 | 0.730924  | 0.924688  | 1.000      |
| 269  | GOBP-CELL-MORPHOGENESIS-INVOLVED-IN-DIFFERENTI... | 21   | -0.295704 | -0.841079 | 0.713969  | 0.925803  | 1.000      |
| 270  | GOBP-POSITIVE-REGULATION-OF-SIGNALING             | 34   | -0.285893 | -0.843108 | 0.714133  | 0.924295  | 1.000      |
| 271  | GOBP-MAPK-CASCADE                                 | 18   | -0.312752 | -0.843483 | 0.701814  | 0.925699  | 1.000      |
| 272  | GOBP-MONOSACCHARIDE-METABOLIC-PROCESS             | 6    | -0.402487 | -0.843875 | 0.713731  | 0.927048  | 1.000      |
| 273  | GOBP-POSITIVE-REGULATION-OF-PHOSPHORUS-METABOL... | 24   | -0.297093 | -0.844084 | 0.727273  | 0.928755  | 1.000      |
| 274  | REACTOME-EXTRACELLULAR-MATRIX-ORGANIZATION        | 5    | -0.416565 | -0.845655 | 0.700269  | 0.927979  | 1.000      |
| 275  | GOBP-REGULATION-OF-CELLULAR-LOCALIZATION          | 17   | -0.316613 | -0.846091 | 0.703072  | 0.929297  | 1.000      |
| 276  | GOBP-REGULATION-OF-ANATOMICAL-STRUCTURE-MORPHO... | 17   | -0.314426 | -0.846493 | 0.696552  | 0.930758  | 1.000      |
| 277  | REACTOME-SIGNALING-BY-GPCR                        | 22   | -0.301464 | -0.847945 | 0.698009  | 0.930243  | 1.000      |
| 278  | GOBP-ADENYLATE-CYCLASE-MODULATING-G-PROTEIN.CO... | 11   | -0.340793 | -0.848593 | 0.655422  | 0.931207  | 1.000      |
| 279  | GOBP-CELLULAR-HOMEOSTASIS                         | 18   | -0.312006 | -0.848644 | 0.686164  | 0.933219  | 1.000      |
| 280  | GOBP-AXON-DEVELOPMENT                             | 18   | -0.307699 | -0.848666 | 0.690722  | 0.935322  | 1.000      |
| 281  | GOBP-CENTRAL-NERVOUS-SYSTEM-DEVELOPMENT           | 26   | -0.297615 | -0.852865 | 0.691548  | 0.929815  | 1.000      |
| 282  | GOBP-NEGATIVE-REGULATION-OF-PHOSPHORUS-METABOL... | 9    | -0.367892 | -0.855815 | 0.680798  | 0.926597  | 1.000      |
| 283  | GOBP-VESICLE-MEDIATED-TRANSPORT-IN-SYNAPSE        | 7    | -0.397977 | -0.857149 | 0.704427  | 0.926325  | 1.000      |
| 284  | GOBP-IMMUNE-EFFECTOR-PROCESS                      | 10   | -0.362676 | -0.857198 | 0.678441  | 0.928356  | 1.000      |
| 285  | GOBP-G-PROTEIN-COUPLED-RECEPTOR-SIGNALING-PATHWAY | 18   | -0.315908 | -0.858409 | 0.678330  | 0.928190  | 1.000      |
| 286  | GOBP-MALE-GAMETE-GENERATION                       | 5    | -0.433735 | -0.859674 | 0.660403  | 0.927937  | 1.000      |
| 287  | GOBP-NEURON-APOPTOTIC-PROCESS                     | 12   | -0.344081 | -0.862356 | 0.658019  | 0.925077  | 1.000      |
| 288  | GOBP-ACTIVATION-OF-IMMUNE-RESPONSE                | 5    | -0.435676 | -0.867597 | 0.684931  | 0.917538  | 1.000      |
| 289  | GOBP-NEGATIVE-REGULATION-OF-CYSTEINE-TYPE-ENDO... | 5    | -0.438609 | -0.874406 | 0.682256  | 0.906974  | 1.000      |
| 290  | REACTOME-VESICLE-MEDIATED-TRANSPORT               | 5    | -0.443327 | -0.874984 | 0.678238  | 0.907972  | 1.000      |
| 291  | REACTOME-G-ALPHA1-SIGNALING-EVENTS                | 18   | -0.317548 | -0.875680 | 0.649718  | 0.908745  | 1.000      |
| 292  | GOBP-CELL-GROWTH                                  | 10   | -0.367305 | -0.876308 | 0.655340  | 0.909546  | 1.000      |
| 293  | GOBP-NEGATIVE-REGULATION-OF-SYNAPTIC-TRANSMISSION | 6    | -0.415980 | -0.877388 | 0.646597  | 0.909204  | 1.000      |
| 294  | GOBP-GLAND-DEVELOPMENT                            | 7    | -0.408347 | -0.878649 | 0.648825  | 0.909678  | 1.000      |
| 295  | GOBP-REGULATION-OF-BINDING                        | 11   | -0.359697 | -0.879989 | 0.644150  | 0.909223  | 1.000      |
| 296  | GOBP-POSITIVE-REGULATION-OF-PROTEIN-MODIFICATI... | 23   | -0.313212 | -0.880207 | 0.656319  | 0.910960  | 1.000      |
| 297  | GOBP-RESPONSE-TO-NUTRIENT                         | 5    | -0.445784 | -0.881715 | 0.665757  | 0.910143  | 1.000      |
| 298  | GOBP-EMBRYO-DEVELOPMENT-ENDING-IN-BIRTH-OR-EGG... | 9    | -0.382137 | -0.884617 | 0.657500  | 0.906398  | 1.000      |

Continuation of Table S18

| NAME | ID                                                  | SIZE | ES        | NES       | NOM.p.val | FDR.q.val | FWER.p.val |
|------|-----------------------------------------------------|------|-----------|-----------|-----------|-----------|------------|
| 299  | GOBP-CARBOHYDRATE-METABOLIC-PROCESS                 | 9    | -0.380630 | -0.884891 | 0.647131  | 0.908019  | 1.000      |
| 300  | GOBP-IONOTROPIC-GLUTAMATE-RECEPTOR-SIGNALING.P...   | 9    | -0.376037 | -0.885641 | 0.656289  | 0.908661  | 1.000      |
| 301  | REACTOME-MEMBRANE-TRAFFICKING                       | 5    | -0.443327 | -0.886122 | 0.659459  | 0.909926  | 1.000      |
| 302  | GOBP-REGULATION-OF-PHOSPHORUS-METABOLIC-PROCESS     | 27   | -0.304471 | -0.886521 | 0.660870  | 0.911319  | 1.000      |
| 303  | GOBP-RESPONSE-TO-UV                                 | 5    | -0.442483 | -0.886539 | 0.661517  | 0.913488  | 1.000      |
| 304  | GOBP-OSTEOBLAST-DIFFERENTIATION                     | 5    | -0.454240 | -0.888900 | 0.657754  | 0.911010  | 1.000      |
| 305  | GOBP-APOPTOTIC-MITOCHONDRIAL-CHANGES                | 6    | -0.425430 | -0.891543 | 0.656417  | 0.908019  | 1.000      |
| 306  | GOBP-REGULATION-OF-TRANSFERASE-ACTIVITY             | 22   | -0.319744 | -0.892851 | 0.634938  | 0.907729  | 1.000      |
| 307  | GOBP-EMBRYONIC-MORPHOGENESIS                        | 6    | -0.427338 | -0.893156 | 0.650190  | 0.909242  | 1.000      |
| 308  | GOBP-MYOTUBE-DIFFERENTIATION                        | 5    | -0.452618 | -0.894736 | 0.633609  | 0.908288  | 1.000      |
| 309  | GOBP-POSITIVE-REGULATION-OF-TRANSPORT               | 26   | -0.311186 | -0.895129 | 0.648291  | 0.909733  | 1.000      |
| 310  | GOBP-POSITIVE-REGULATION-OF-SMALL-MOLECULE-MET...   | 5    | -0.454852 | -0.898450 | 0.620321  | 0.905173  | 1.000      |
| 311  | GOBP-NEGATIVE-REGULATION-OF-SIGNALING               | 12   | -0.363630 | -0.899305 | 0.626478  | 0.905751  | 1.000      |
| 312  | GOBP-PROTEIN-PHOSPHORYLATION                        | 21   | -0.324175 | -0.900817 | 0.622047  | 0.904842  | 1.000      |
| 313  | GOBP-PROTEIN-PHOSPHORYLATION                        | 34   | -0.299829 | -0.901227 | 0.620022  | 0.906226  | 1.000      |
| 314  | GOBP-POSITIVE-REGULATION-OF-PROTEIN-KINASE-ACTIVITY | 23   | -0.313212 | -0.903069 | 0.615128  | 0.904766  | 1.000      |
| 315  | GOBP-REGULATION-OF-PROTEIN-KINASE-ACTIVITY          | 22   | -0.319744 | -0.906602 | 0.607821  | 0.899690  | 1.000      |
| 316  | GOBP-HOMEOSTASIS-OF-NUMBER-OF-CELLS                 | 5    | -0.457813 | -0.907640 | 0.617766  | 0.899772  | 1.000      |
| 317  | GOBP-PROTEIN-LOCALIZATION-TO-POSTSYNAPSE            | 5    | -0.462052 | -0.909168 | 0.604336  | 0.898876  | 1.000      |
| 318  | GOBP-CELLULAR-MACROMOLECULE-LOCALIZATION            | 21   | -0.320447 | -0.909519 | 0.600660  | 0.900366  | 1.000      |
| 319  | GOBP-NERVOUS-SYSTEM-PROCESS                         | 38   | -0.303719 | -0.910068 | 0.605042  | 0.901471  | 1.000      |
| 320  | GOBP-REGULATION-OF-LYMPHOCYTE-ACTIVATION            | 5    | -0.456349 | -0.910253 | 0.613636  | 0.903377  | 1.000      |
| 321  | GOBP-REGULATION-OF-FAT-CELL-DIFFERENTIATION         | 6    | -0.438605 | -0.912003 | 0.613423  | 0.901912  | 1.000      |
| 322  | GOBP-REGULATION-OF-MAPK-CASCADE                     | 13   | -0.361865 | -0.912646 | 0.598566  | 0.902844  | 1.000      |
| 323  | GOBP-RESPONSE-TO-DRUG                               | 11   | -0.370977 | -0.913092 | 0.583738  | 0.904112  | 1.000      |
| 324  | GOBP-INFLAMMATORY-RESPONSE                          | 12   | -0.365702 | -0.913767 | 0.616505  | 0.904903  | 1.000      |
| 325  | GOBP-PROTEIN-LOCALIZATION-TO-SYNAPSE                | 5    | -0.462052 | -0.917417 | 0.587169  | 0.899595  | 1.000      |
| 326  | GOBP-EPITHELIUM-DEVELOPMENT                         | 15   | -0.351674 | -0.919425 | 0.586247  | 0.897721  | 1.000      |
| 327  | GOBP-WOUND-HEALING                                  | 13   | -0.365414 | -0.921845 | 0.586729  | 0.894894  | 1.000      |
| 328  | GOBP-HEAD-DEVELOPMENT                               | 22   | -0.324855 | -0.926472 | 0.583058  | 0.887190  | 1.000      |
| 329  | GOBP-REGULATION-OF-VASCULATURE-DEVELOPMENT          | 5    | -0.471428 | -0.926616 | 0.560876  | 0.889206  | 1.000      |
| 330  | GOBP-POSITIVE-REGULATION-OF-TRANSFERASE-ACTIVITY    | 20   | -0.336846 | -0.928507 | 0.570304  | 0.887589  | 1.000      |
| 331  | GOBP-REGULATION-OF-ENDOCYTOSIS                      | 6    | -0.441263 | -0.929737 | 0.600522  | 0.887242  | 1.000      |
| 332  | GOBP-REGULATION-OF-DNA-BINDING-TRANSCRIPTION.F...   | 16   | -0.349400 | -0.931666 | 0.582367  | 0.885333  | 1.000      |
| 333  | GOBP-LOCOMOTION                                     | 31   | -0.316732 | -0.934462 | 0.589071  | 0.881361  | 1.000      |
| 334  | GOBP-BEHAVIOR                                       | 32   | -0.313088 | -0.935927 | 0.567308  | 0.880217  | 1.000      |
| 335  | GOBP-REGULATION-OF-PROTEOLYSIS                      | 12   | -0.371230 | -0.940270 | 0.552311  | 0.872786  | 1.000      |
| 336  | GOBP-TEMPERATURE-HOMEOSTASIS                        | 5    | -0.475103 | -0.941418 | 0.575305  | 0.872600  | 1.000      |
| 337  | GOBP-REGULATION-OF-CELL-CELL-ADHESION               | 9    | -0.406290 | -0.941579 | 0.556391  | 0.874613  | 1.000      |
| 338  | GOBP-POSITIVE-REGULATION-OF-ESTABLISHMENT-OF_P...   | 5    | -0.479214 | -0.942112 | 0.557952  | 0.875715  | 1.000      |
| 339  | REACTOME-CIRCADIAN-CLOCK                            | 5    | -0.487314 | -0.943023 | 0.570442  | 0.862342  | 1.000      |
| 340  | GOBP-RESPONSE-TO-LIGHT-STIMULUS                     | 11   | -0.389385 | -0.949427 | 0.539683  | 0.863704  | 1.000      |
| 341  | GOBP-RESPONSE-TO-WOUNDING                           | 15   | -0.365622 | -0.950174 | 0.546620  | 0.864447  | 1.000      |

Continuation of Table S18

|     | NAME                                                        | ID            | SIZE | ES        | NES       | NOM.p.val | FDR.q.val | FWER.p.val |
|-----|-------------------------------------------------------------|---------------|------|-----------|-----------|-----------|-----------|------------|
| 342 | GOBP-POSITIVE-REGULATION-OF-GROWTH                          | GO-0045927    | 9    | -0.404314 | -0.950258 | 0.559343  | 0.866564  | 1.000      |
| 343 | GOBP-ESTABLISHMENT-OF-PROTEIN-LOCALIZATION                  | GO-0045184    | 18   | -0.349232 | -0.951107 | 0.553022  | 0.867128  | 1.000      |
| 344 | GOBP-DEVELOPMENTAL-GROWTH                                   | GO-0048589    | 10   | -0.401727 | -0.951248 | 0.567308  | 0.869177  | 1.000      |
| 345 | GOBP-REGULATION-OF-GTPASE-ACTIVITY                          | GO-0043087    | 5    | -0.480972 | -0.951959 | 0.557123  | 0.869931  | 1.000      |
| 346 | REACTOME-LEISHMANIA-INFECTIO                                | R-HSA-9658195 | 10   | -0.395238 | -0.952150 | 0.563659  | 0.871791  | 1.000      |
| 347 | GOBP-IN-UTERO-EMBRYONIC-DEVELOPMENT                         | GO-0001701    | 8    | -0.425529 | -0.952958 | 0.568702  | 0.872337  | 1.000      |
| 348 | GOBP-NEGATIVE-REGULATION-OF-PROTEIN-MODIFICATION            | GO-0031400    | 10   | -0.406245 | -0.954104 | 0.539855  | 0.872071  | 1.000      |
| 349 | REACTOME-DEATH-RECEPTOR-SIGNALING                           | R-RNO-73887   | 5    | -0.486466 | -0.955720 | 0.544952  | 0.870727  | 1.000      |
| 350 | GOBP-NEGATIVE-REGULATION-OF-INTRACELLULAR-SIGNALING         | GO-1902532    | 7    | -0.437106 | -0.958242 | 0.554140  | 0.867389  | 1.000      |
| 351 | GOBP-RECEPTOR-INTERNALIZATION                               | GO-0031623    | 5    | -0.494890 | -0.958871 | 0.546961  | 0.868421  | 1.000      |
| 352 | GOBP-G-PROTEIN-COUPLED-GLUTAMATE-RECEPTOR-SIGNALING         | GO-0007216    | 8    | -0.422644 | -0.959570 | 0.538657  | 0.869213  | 1.000      |
| 353 | GOBP-ORGANIC-ACID-METABOLIC-PROCESS                         | GO-0006082    | 7    | -0.433558 | -0.960023 | 0.529936  | 0.870558  | 1.000      |
| 354 | GOBP-REGULATION-OF-MUSCLE-CELL-DIFFERENTIATION              | GO-0051147    | 6    | -0.465580 | -0.961155 | 0.520750  | 0.870326  | 1.000      |
| 355 | GOBP-GLUTAMATE-RECEPTOR-SIGNALING-PATHWAY                   | GO-0007215    | 17   | -0.362039 | -0.964349 | 0.534025  | 0.865538  | 1.000      |
| 356 | REACTOME-NEUROTRANSMITTER-RECEPTORS-AND-POSTSYNAPTIC        | R-RNO-112314  | 22   | -0.343138 | -0.965251 | 0.540000  | 0.865637  | 1.000      |
| 357 | GOBP-REGULATION-OF-MUSCLE-SYSTEM-PROCESS                    | GO-00090257   | 8    | -0.438128 | -0.965628 | 0.540676  | 0.867176  | 1.000      |
| 358 | GOBP-POSITIVE-REGULATION-OF-PROTEIN-METABOLIC-PROCESS       | GO-0051247    | 28   | -0.332455 | -0.965983 | 0.544858  | 0.868812  | 1.000      |
| 359 | GOBP-REGULATION-OF-DEVELOPMENTAL-GROWTH                     | GO-0048638    | 9    | -0.422696 | -0.967731 | 0.543226  | 0.867259  | 1.000      |
| 360 | REACTOME-PROTEIN-PROTEIN-INTERACTIONS-AT-SYNAPSES           | R-RNO-6794362 | 12   | -0.394165 | -0.970692 | 0.506634  | 0.862815  | 1.000      |
| 361 | GOBP-HEART-DEVELOPMENT                                      | GO-0007507    | 6    | -0.467978 | -0.970929 | 0.529032  | 0.864687  | 1.000      |
| 362 | REACTOME-CYTOKINE-SIGNALING-IN-IMMUNE-SYSTEM                | R-RNO-1280215 | 21   | -0.349148 | -0.971337 | 0.547778  | 0.866156  | 1.000      |
| 363 | GOBP-MEMBRANE-ORGANIZATION                                  | GO-0061024    | 12   | -0.392707 | -0.971816 | 0.523298  | 0.867394  | 1.000      |
| 364 | GOBP-SENSORY-ORGAN-DEVELOPMENT                              | GO-0007423    | 8    | -0.427625 | -0.972444 | 0.508728  | 0.868306  | 1.000      |
| 365 | GOBP-SENSORY-PERCEPTION                                     | GO-0007600    | 9    | -0.409585 | -0.972546 | 0.522670  | 0.870523  | 1.000      |
| 366 | GOBP-POSITIVE-REGULATION-OF-CELLULAR-COMPONENT-TRANSPORT    | GO-0051130    | 24   | -0.337240 | -0.973445 | 0.524698  | 0.870984  | 1.000      |
| 367 | GOBP-POSITIVE-REGULATION-OF-HEMOPOIESIS                     | GO-1903708    | 7    | -0.450708 | -0.974867 | 0.538847  | 0.870171  | 1.000      |
| 368 | GOBP-REGULATION-OF-PROTEIN-SERINE-THREONINE-KINASE-ACTIVITY | GO-0071900    | 12   | -0.386944 | -0.977065 | 0.512315  | 0.867286  | 1.000      |
| 369 | GOBP-NEGATIVE-REGULATION-OF-PHOSPHORYLATION                 | GO-0042326    | 7    | -0.445823 | -0.977728 | 0.512041  | 0.868159  | 1.000      |
| 370 | GOBP-NEGATIVE-REGULATION-OF-TRANSFERASE-ACTIVITY            | GO-0051348    | 5    | -0.504454 | -0.981067 | 0.516438  | 0.862534  | 1.000      |
| 371 | GOBP-CARDIAC-MUSCLE-TISSUE-DEVELOPMENT                      | GO-0048738    | 6    | -0.467978 | -0.982297 | 0.492848  | 0.862042  | 1.000      |
| 372 | GOBP-POSITIVE-REGULATION-OF-PROTEIN-KINASE-ACTIVITY         | GO-0045860    | 19   | -0.363393 | -0.982850 | 0.521691  | 0.863090  | 1.000      |
| 373 | GOBP-MONOCARBOXYLIC-ACID-METABOLIC-PROCESS                  | GO-0032787    | 6    | -0.464644 | -0.983229 | 0.499331  | 0.864703  | 1.000      |
| 374 | GOBP-RECEPTOR-METABOLIC-PROCESS                             | GO-0043112    | 5    | -0.494890 | -0.984874 | 0.503448  | 0.863198  | 1.000      |
| 375 | GOBP-REGULATION-OF-ION-TRANSPORT                            | GO-0043269    | 36   | -0.328275 | -0.987730 | 0.494612  | 0.859025  | 1.000      |
| 376 | GOBP-NUCLEAR-TRANSPORT                                      | GO-0051169    | 5    | -0.503324 | -0.988208 | 0.503383  | 0.860423  | 1.000      |
| 377 | REACTOME-INNATE-IMMUNE-SYSTEM                               | R-RNO-168249  | 16   | -0.370581 | -0.989422 | 0.515789  | 0.859854  | 1.000      |
| 378 | GOBP-CELL-MIGRATION                                         | GO-0016477    | 22   | -0.349300 | -0.990111 | 0.488294  | 0.860717  | 1.000      |
| 379 | GOBP-MUSCLE-CELL-DIFFERENTIATION                            | GO-0042692    | 10   | -0.409796 | -0.991929 | 0.523694  | 0.858847  | 1.000      |
| 380 | GOBP-NEGATIVE-REGULATION-OF-BINDING                         | GO-0051100    | 6    | -0.477434 | -0.992192 | 0.494148  | 0.860729  | 1.000      |
| 381 | GOBP-MUSCLE-CONTRACTION                                     | GO-0006936    | 5    | -0.506732 | -0.992936 | 0.487110  | 0.861403  | 1.000      |
| 382 | GOBP-REGULATION-OF-OSTEOCLAST-DIFFERENTIATION               | GO-0045670    | 5    | -0.502493 | -0.993573 | 0.487738  | 0.862413  | 1.000      |
| 383 | GOBP-SENSORY-PERCEPTION-OF-PAIN                             | GO-0019233    | 5    | -0.493976 | -0.995700 | 0.494595  | 0.859704  | 1.000      |
| 384 | GOBP-REGULATION-OF-CELL-DEATH                               | GO-0010941    | 34   | -0.336609 | -0.995738 | 0.492600  | 0.862166  | 1.000      |

Continuation of Table S18

|     | NAME                                              | ID            | SIZE | ES        | NES       | NOM.p.val | FDR.q.val | FWER.p.val |
|-----|---------------------------------------------------|---------------|------|-----------|-----------|-----------|-----------|------------|
| 385 | GOBP-REGULATION-OF-ENDOTHELIAL-CELL-MIGRATION     | GO-0010594    | 5    | -0.505829 | -0.995910 | 0.496011  | 0.864317  | 1.000      |
| 386 | REACTOME-DISEASES-OF-SIGNAL-TRANSDUCTION-BY_GR... | R-HSA-5663202 | 12   | -0.397706 | -0.996564 | 0.505455  | 0.865259  | 1.000      |
| 387 | GOBP-NEGATIVE-REGULATION-OF-KINASE-ACTIVITY       | GO-0033673    | 5    | -0.504454 | -0.997571 | 0.480170  | 0.865427  | 1.000      |
| 388 | GOBP-NEGATIVE-REGULATION-OF-LIPID-METABOLIC-PR... | GO-0045833    | 5    | -0.514950 | -0.998249 | 0.467940  | 0.866417  | 1.000      |
| 389 | GOBP-NEGATIVE-REGULATION-OF-MOLECULAR-FUNCTION    | GO-0044092    | 24   | -0.345614 | -0.999845 | 0.481195  | 0.864976  | 1.000      |
| 390 | GOBP-REGULATION-OF-RECEPTOR-MEDIATED-ENDOCYTOSIS  | GO-0048259    | 5    | -0.510252 | -1.003910 | 0.487614  | 0.857114  | 1.000      |
| 391 | GOBP-PROTEIN-AUTOPHOSPHORYLATION                  | GO-0046777    | 5    | -0.513834 | -1.005372 | 0.467480  | 0.855944  | 1.000      |
| 392 | GOBP-RESPONSE-TO-CARBOHYDRATE                     | GO-0009743    | 5    | -0.512255 | -1.007988 | 0.483266  | 0.851775  | 1.000      |
| 393 | GOBP-PEPTIDYL-SERINE-MODIFICATION                 | GO-0018209    | 12   | -0.411258 | -1.010005 | 0.460890  | 0.849207  | 1.000      |
| 394 | GOBP-NEGATIVE-REGULATION-OF-CELL-DEVELOPMENT      | GO-0010721    | 6    | -0.488130 | -1.013867 | 0.452349  | 0.841992  | 1.000      |
| 395 | GOBP-NEGATIVE-REGULATION-OF-NERVOUS-SYSTEM-DEV... | GO-0051961    | 5    | -0.504016 | -1.014013 | 0.462500  | 0.844197  | 1.000      |
| 396 | GOBP-CHEMICAL-HOMEOSTASIS                         | GO-0048878    | 23   | -0.352719 | -1.014069 | 0.468397  | 0.846634  | 1.000      |
| 397 | GOBP-RESPONSE-TO-MONOSACCHARIDE                   | GO-0034284    | 5    | -0.512255 | -1.015044 | 0.466572  | 0.846628  | 1.000      |
| 398 | GOBP-CELLULAR-COMPONENT-MAINTENANCE               | GO-0043453    | 5    | -0.513453 | -1.017411 | 0.451268  | 0.843086  | 1.000      |
| 399 | GOBP-NEURON-PROJECTION-GUIDANCE                   | GO-0097485    | 9    | -0.439338 | -1.018113 | 0.453184  | 0.843989  | 1.000      |
| 400 | GOBP-REGULATION-OF-CELLULAR-CATABOLIC-PROCESS     | GO-0031329    | 10   | -0.424600 | -1.019401 | 0.470096  | 0.843123  | 1.000      |
| 401 | REACTOME-INTERFERON-SIGNALING                     | R-RNO-913531  | 6    | -0.485531 | -1.019997 | 0.451268  | 0.844221  | 1.000      |
| 402 | GOBP-RESPONSE-TO-ALKALOID                         | GO-0043279    | 5    | -0.518072 | -1.022121 | 0.435247  | 0.841342  | 1.000      |
| 403 | GOBP-REGULATION-OF-EPITHELIAL-CELL-MIGRATION      | GO-0010632    | 6    | -0.488591 | -1.022388 | 0.428016  | 0.843257  | 1.000      |
| 404 | GOBP-REGULATION-OF-CELLULAR-COMPONENT-MOVEMENT    | GO-0051270    | 15   | -0.392554 | -1.022894 | 0.464692  | 0.844514  | 1.000      |
| 405 | GOBP-POSITIVE-REGULATION-OF-CELL-DIFFERENTIATION  | GO-0045597    | 27   | -0.359060 | -1.023380 | 0.454345  | 0.845900  | 1.000      |
| 406 | GOBP-BIOLOGICAL-PROCESS-INVOLVED-IN-SYMBIOTIC-... | GO-004440     | 11   | -0.417840 | -1.025857 | 0.436019  | 0.841956  | 1.000      |
| 407 | GOBP-REGULATION-OF-PHOSPHATIDYLINOSITOL-3-KINA... | GO-0014066    | 6    | -0.491266 | -1.026606 | 0.453595  | 0.842593  | 1.000      |
| 408 | REACTOME-SIGNALING-BY-WNT                         | R-RNO-195721  | 7    | -0.477680 | -1.027590 | 0.450392  | 0.842767  | 1.000      |
| 409 | GOBP-POSITIVE-REGULATION-OF-ION-TRANSPORT         | GO-0043270    | 17   | -0.384523 | -1.028080 | 0.444319  | 0.844098  | 1.000      |
| 410 | GOBP-NEGATIVE-REGULATION-OF-NEURON-APOPTOTIC_P... | GO-0043524    | 8    | -0.460376 | -1.029150 | 0.441890  | 0.844021  | 1.000      |
| 411 | REACTOME-TRANSMISSION-ACROSS-CHEMICAL-SYNAPSES    | R-RNO-112315  | 23   | -0.359738 | -1.029511 | 0.448430  | 0.845740  | 1.000      |
| 412 | GOBP-OSSIFICATION                                 | GO-0001503    | 9    | -0.439058 | -1.030010 | 0.434080  | 0.847156  | 1.000      |
| 413 | GOBP-REGULATION-OF-AXONOGENESIS                   | GO-0050770    | 7    | -0.480227 | -1.030538 | 0.412739  | 0.848520  | 1.000      |
| 414 | GOBP-POSITIVE-REGULATION-OF-MAPK-CASCADE          | GO-0043410    | 9    | -0.442603 | -1.030539 | 0.431181  | 0.851302  | 1.000      |
| 415 | REACTOME-CREB1-PHOSPHORYLATION-THROUGH-NMDA-RE... | R-RNO-442742  | 8    | -0.464570 | -1.034443 | 0.424051  | 0.843484  | 1.000      |
| 416 | GOBP-REGULATION-OF-PROTEIN-BINDING                | GO-0043393    | 7    | -0.476756 | -1.038274 | 0.439791  | 0.835977  | 1.000      |
| 417 | GOBP-NEGATIVE-REGULATION-OF-MULTICELLULAR_ORGA... | GO-0051241    | 15   | -0.401193 | -1.038663 | 0.422170  | 0.837663  | 1.000      |
| 418 | GOBP-REGULATION-OF-ORGAN-GROWTH                   | GO-0046620    | 5    | -0.529944 | -1.039577 | 0.425474  | 0.838028  | 1.000      |
| 419 | GOBP-POSITIVE-REGULATION-OF-AXONOGENESIS          | GO-0050772    | 5    | -0.522941 | -1.040028 | 0.430556  | 0.839466  | 1.000      |
| 420 | REACTOME-G-ALPHA-Z-SIGNALING-EVENTS               | R-RNO-418597  | 5    | -0.521000 | -1.040966 | 0.423611  | 0.839653  | 1.000      |
| 421 | GOBP-MUSCLE-STRUCTURE-DEVELOPMENT                 | GO-0061061    | 16   | -0.393444 | -1.041659 | 0.451835  | 0.840629  | 1.000      |
| 422 | GOBP-REGULATION-OF-LIPID-LOCALIZATION             | GO-1905952    | 5    | -0.465508 | -1.041910 | 0.423868  | 0.842783  | 1.000      |
| 423 | GOBP-POSITIVE-REGULATION-OF-DEVELOPMENTAL-GROWTH  | GO-0048639    | 8    | -0.465508 | -1.043629 | 0.422879  | 0.841062  | 1.000      |
| 424 | GOBP-PHOSPHATIDYLINOSITOL-3-KINASE-SIGNALING      | GO-0014065    | 7    | -0.477351 | -1.045551 | 0.417344  | 0.838712  | 1.000      |
| 425 | GOBP-LIPID-METABOLIC-PROCESS                      | GO-0006629    | 10   | -0.437588 | -1.046918 | 0.436518  | 0.837895  | 1.000      |
| 426 | REACTOME-NEUREXINS-AND-NEUROLIGINS                | R-RNO-6794361 | 9    | -0.449711 | -1.047289 | 0.440594  | 0.839715  | 1.000      |
| 427 | GOBP-RESPONSE-TO-MECHANICAL-STIMULUS              | GO-0009612    | 6    | -0.509930 | -1.049657 | 0.397117  | 0.835702  | 1.000      |

Continuation of Table S18

| NAME | ID                                                | SIZE | ES        | NES       | NOM.p.val | FDR.q.val | FWER.p.val |
|------|---------------------------------------------------|------|-----------|-----------|-----------|-----------|------------|
| 428  | GOBP-POSITIVE-REGULATION-OF-INTRACELLULAR-SIGN... | 14   | -0.410030 | -1.054073 | 0.418033  | 0.826174  | 1.000      |
| 429  | GOBP-INTRACELLULAR-PROTEIN-TRANSPORT              | 9    | -0.459869 | -1.056107 | 0.413580  | 0.823356  | 1.000      |
| 430  | GOBP-CYTOSKELETON-ORGANIZATION                    | 11   | -0.439503 | -1.057694 | 0.409976  | 0.822015  | 1.000      |
| 431  | GOBP-INOSITOL-LIPID-MEDIATED-SIGNALING            | 8    | -0.475753 | -1.058219 | 0.409439  | 0.823317  | 1.000      |
| 432  | GOBP-CELLULAR-CARBOHYDRATE-METABOLIC-PROCESS      | 5    | -0.533794 | -1.059430 | 0.398929  | 0.822864  | 1.000      |
| 433  | GOBP-EMBRYONIC-ORGAN-DEVELOPMENT                  | 7    | -0.483291 | -1.059645 | 0.385101  | 0.825207  | 1.000      |
| 434  | GOBP-ORGAN-GROWTH                                 | 5    | -0.529944 | -1.059876 | 0.404167  | 0.827399  | 1.000      |
| 435  | REACTOME-BETA-CATENIN-INDEPENDENT-WNT-SIGNALING   | 5    | -0.531400 | -1.063301 | 0.370421  | 0.820622  | 1.000      |
| 436  | GOBP-NEGATIVE-REGULATION-OF-CATALYTIC-ACTIVITY    | 17   | -0.401790 | -1.065959 | 0.405780  | 0.815934  | 1.000      |
| 437  | GOBP-REGULATION-OF-PEPTIDE-TRANSPORT              | 10   | -0.451905 | -1.066714 | 0.390036  | 0.816556  | 1.000      |
| 438  | GOBP-APOPTOTIC-PROCESS                            | 35   | -0.353009 | -1.067269 | 0.404482  | 0.817778  | 1.000      |
| 439  | GOBP-REGULATION-OF-APOPTOTIC-SIGNALING-PATHWAY    | 10   | -0.447476 | -1.067539 | 0.397546  | 0.819883  | 1.000      |
| 440  | REACTOME-LIGAND-INTERACTIONS                      | 5    | -0.544527 | -1.067551 | 0.399171  | 0.822785  | 1.000      |
| 441  | GOBP-POSITIVE-REGULATION-OF-ORGANELLE-ORGANIZA... | 10   | -0.451521 | -1.067589 | 0.394673  | 0.825649  | 1.000      |
| 442  | GOBP-REGULATION-OF-MULTICELLULAR-ORGANISMAL-DE... | 31   | -0.357134 | -1.075588 | 0.380851  | 0.805237  | 1.000      |
| 443  | GOBP-REGULATION-OF-CYTOSKELETON-ORGANIZATION      | 5    | -0.540803 | -1.075615 | 0.349933  | 0.808092  | 1.000      |
| 444  | GOBP-RESPONSE-TO-NERVE-GROWTH-FACTOR              | 7    | -0.491605 | -1.076152 | 0.372215  | 0.809546  | 1.000      |
| 445  | GOBP-NERVE-DEVELOPMENT                            | 9    | -0.463842 | -1.076488 | 0.401741  | 0.811619  | 1.000      |
| 446  | GOBP-RHYTHMIC-PROCESS                             | 15   | -0.415136 | -1.080386 | 0.377598  | 0.803425  | 1.000      |
| 447  | GOBP-ENDOCRINE-SYSTEM-DEVELOPMENT                 | 6    | -0.517580 | -1.080770 | 0.356784  | 0.805173  | 1.000      |
| 448  | GOBP-RESPONSE-TO-EXTRACELLULAR-STIMULUS           | 13   | -0.423274 | -1.081271 | 0.371328  | 0.806764  | 1.000      |
| 449  | GOBP-POSITIVE-REGULATION-OF-MYELOID-CELL-DIFFE... | 7    | -0.505257 | -1.081700 | 0.374359  | 0.808540  | 1.000      |
| 450  | GOBP-FAT-CELL-DIFFERENTIATION                     | 9    | -0.461689 | -1.086858 | 0.354061  | 0.796433  | 1.000      |
| 451  | GOBP-NEGATIVE-REGULATION-OF-RESPONSE-TO-EXTERN... | 5    | -0.552747 | -1.092012 | 0.363874  | 0.784385  | 1.000      |
| 452  | GOBP-REGULATION-OF-PEPTIDASE-ACTIVITY             | 10   | -0.461979 | -1.092486 | 0.366748  | 0.785910  | 1.000      |
| 453  | GOBP-INTRINSIC-APOPTOTIC-SIGNALING-PATHWAY        | 5    | -0.546028 | -1.092903 | 0.337802  | 0.787705  | 1.000      |
| 454  | GOBP-NUCLEOBASE-CONTAINING-SMALL-MOLECULE-META... | 6    | -0.522361 | -1.093808 | 0.342704  | 0.787886  | 1.000      |
| 455  | GOBP-MATERNAL-PROCESS-INVOLVED-IN-FEMALE-PREGN... | 5    | -0.547650 | -1.094254 | 0.360811  | 0.789575  | 1.000      |
| 456  | GOBP-RECEPTOR-MEDIATED-ENDOCYTOSIS                | 6    | -0.524928 | -1.094730 | 0.341927  | 0.791123  | 1.000      |
| 457  | GOBP-EXOCYTOSIS                                   | 11   | -0.445940 | -1.097064 | 0.361474  | 0.787356  | 1.000      |
| 458  | GOBP-REGULATION-OF-LEUKOCYTE-DIFFERENTIATION      | 9    | -0.473565 | -1.098939 | 0.354321  | 0.784823  | 1.000      |
| 459  | GOBP-AMEBOIDAL-TYPE-CELL-MIGRATION                | 11   | -0.462080 | -1.102169 | 0.352246  | 0.778427  | 1.000      |
| 460  | GOBP-OSTEOCLAST-DIFFERENTIATION                   | 6    | -0.532135 | -1.102181 | 0.347712  | 0.781394  | 1.000      |
| 461  | GOBP-RAS-PROTEIN-SIGNAL-TRANSDUCTION              | 5    | -0.551180 | -1.103545 | 0.343324  | 0.780224  | 1.000      |
| 462  | REACTOME-HEMOSTASIS                               | 14   | -0.434580 | -1.105133 | 0.349112  | 0.778446  | 1.000      |
| 463  | GOBP-POSTTRANSCRIPTIONAL-REGULATION-OF-GENE-EX... | 8    | -0.494436 | -1.105477 | 0.341740  | 0.780452  | 1.000      |
| 464  | GOBP-IMMUNE-RESPONSE-REGULATING-SIGNALING-PATHWAY | 8    | -0.492427 | -1.107423 | 0.338832  | 0.777720  | 1.000      |
| 465  | REACTOME-TOLL-LIKE-RECEPTOR-9-TLR9-CASCADE        | 8    | -0.494573 | -1.108818 | 0.336683  | 0.776540  | 1.000      |
| 466  | REACTOME-MYD88-INDEPENDENT-TLR4-CASCADE           | 8    | -0.494573 | -1.109328 | 0.341371  | 0.778194  | 1.000      |
| 467  | GOBP-TAXIS                                        | 14   | -0.428495 | -1.110798 | 0.326744  | 0.776863  | 1.000      |
| 468  | GOBP-MYELOID-LEUKOCYTE-ACTIVATION                 | 8    | -0.490411 | -1.111388 | 0.319481  | 0.778058  | 1.000      |
| 469  | GOBP-TUBE-MORPHOGENESIS                           | 15   | -0.425619 | -1.112571 | 0.340278  | 0.777468  | 1.000      |
| 470  | GOBP-REGULATION-OF-HORMONE-LEVELS                 | 12   | -0.453927 | -1.113239 | 0.328622  | 0.778494  | 1.000      |

Continuation of Table S18

|     | NAME                                               | ID            | SIZE | ES        | NES       | NOM.p.val | FDR.q.val | FWER.p.val |
|-----|----------------------------------------------------|---------------|------|-----------|-----------|-----------|-----------|------------|
| 471 | GOBP-NEGATIVE-REGULATION-OF-NEURON-DEATH           | GO-1901215    | 11   | -0.452437 | -1.114802 | 0.333741  | 0.776651  | 1.000      |
| 472 | REACTOME_TOLL-LIKE-RECEPTOR-CASCADES               | R-RNO-168898  | 8    | -0.494573 | -1.116775 | 0.317781  | 0.774171  | 1.000      |
| 473 | REACTOME_TOLL-LIKE-RECEPTOR-TLR1-TLR2-CASCADE      | R-RNO-168179  | 8    | -0.494573 | -1.118786 | 0.335045  | 0.771512  | 1.000      |
| 474 | GOBP-ORGANIC-HYDROXY-COMPOUND-TRANSPORT            | GO-0015850    | 6    | -0.533197 | -1.121222 | 0.320051  | 0.767263  | 1.000      |
| 475 | GOBP-FC-RECEPTOR-SIGNALING-PATHWAY                 | GO-0038093    | 8    | -0.492427 | -1.121832 | 0.302564  | 0.768629  | 1.000      |
| 476 | GOBP-REGULATION-OF-ORGANELLE-ORGANIZATION          | GO-0033043    | 14   | -0.434467 | -1.124089 | 0.336105  | 0.764993  | 1.000      |
| 477 | GOBP-FC-EPSILON-RECEPTOR-SIGNALING-PATHWAY         | GO-0038095    | 7    | -0.513467 | -1.127053 | 0.312581  | 0.759210  | 1.000      |
| 478 | GOBP-POSITIVE-REGULATION-OF-MYELOID-LEUKOCYTE....  | GO-0002763    | 6    | -0.538832 | -1.130451 | 0.288512  | 0.752033  | 1.000      |
| 479 | REACTOME_FC-EPSILON-RECEPTOR-FCERL-SIGNALING       | R-RNO-2454202 | 7    | -0.513467 | -1.132265 | 0.305520  | 0.749660  | 1.000      |
| 480 | GOBP-GROWTH                                        | GO-0040007    | 14   | -0.447146 | -1.135248 | 0.313860  | 0.744224  | 1.000      |
| 481 | GOBP-BLOOD-VESSEL-MORPHOGENESIS                    | GO-0048514    | 14   | -0.441572 | -1.136421 | 0.309327  | 0.743980  | 1.000      |
| 482 | GOBP-REGULATION-OF-CELL-ACTIVATION                 | GO-0050865    | 8    | -0.504492 | -1.137817 | 0.321429  | 0.742810  | 1.000      |
| 483 | GOBP-REGULATION-OF-NEURONAL-SYNAPTIC-PLASTICITY    | GO-0048168    | 7    | -0.528319 | -1.139618 | 0.325611  | 0.740528  | 1.000      |
| 484 | GOBP-REGULATION-OF-BODY-FLUID-LEVELS               | GO-0050878    | 11   | -0.466218 | -1.140047 | 0.299031  | 0.742402  | 1.000      |
| 485 | GOBP-POSITIVE-REGULATION-OF-PROTEIN-SERINE-THR.... | GO-0071902    | 9    | -0.493555 | -1.141359 | 0.296798  | 0.741461  | 1.000      |
| 486 | GOBP-SMALL-MOLECULE-METABOLIC-PROCESS              | GO-0044281    | 15   | -0.442990 | -1.141393 | 0.310983  | 0.744539  | 1.000      |
| 487 | REACTOME-INFECTIOUS-DISEASE                        | R-HSA-5663205 | 13   | -0.448255 | -1.143323 | 0.314079  | 0.741997  | 1.000      |
| 488 | GOBP-ENDOCYTOSIS                                   | GO-0068897    | 8    | -0.502546 | -1.144852 | 0.288804  | 0.740235  | 1.000      |
| 489 | GOBP-POSITIVE-REGULATION-OF-NEURON-DEATH           | GO-1901216    | 5    | -0.580665 | -1.147928 | 0.293478  | 0.734172  | 1.000      |
| 490 | GOBP-POSITIVE-REGULATION-OF-DEVELOPMENTAL-PROCESS  | GO-0051094    | 32   | -0.390242 | -1.148293 | 0.280553  | 0.736120  | 1.000      |
| 491 | GOBP-PROTEIN-COMPLEX-OLIGOMERIZATION               | GO-0051259    | 6    | -0.549081 | -1.149312 | 0.280000  | 0.736151  | 1.000      |
| 492 | GOBP-CELLULAR-RESPONSE-TO-MOLECULE-OF-BACTERIA...  | GO-0071219    | 8    | -0.519658 | -1.151403 | 0.265789  | 0.732997  | 1.000      |
| 493 | GOBP-RESPONSE-TO-NICOTINE                          | GO-0035094    | 7    | -0.530603 | -1.151682 | 0.272152  | 0.735404  | 1.000      |
| 494 | GOBP-REGULATION-OF-GROWTH                          | GO-0040008    | 13   | -0.463149 | -1.154998 | 0.286047  | 0.728615  | 1.000      |
| 495 | GOBP-PROTEIN-MODIFICATION-BY-SMALL-PROTEIN-CON...  | GO-0070647    | 7    | -0.535659 | -1.157397 | 0.278859  | 0.724745  | 1.000      |
| 496 | GOBP-LOCOMOTORY-BEHAVIOR                           | GO-0007626    | 19   | -0.533040 | -1.158419 | 0.253947  | 0.724770  | 1.000      |
| 497 | GOBP-CIRCADIAN-RHYTHM                              | GO-0007623    | 13   | -0.462430 | -1.161839 | 0.270463  | 0.717091  | 1.000      |
| 498 | GOBP-DEFENSE-RESPONSE                              | GO-0006952    | 19   | -0.426618 | -1.164526 | 0.260771  | 0.711494  | 1.000      |
| 499 | HALLMARK-HYPOXIA                                   | M5891         | 5    | -0.597419 | -1.167531 | 0.266297  | 0.705531  | 1.000      |
| 500 | REACTOME-ONCOGENIC-MAPK-SIGNALING                  | R-HSA-6802957 | 5    | -0.595493 | -1.167960 | 0.257576  | 0.707449  | 1.000      |
| 501 | GOBP-LEUKOCYTE-MEDIATED-IMMUNITY                   | GO-0002443    | 7    | -0.534614 | -1.169171 | 0.259843  | 0.706984  | 1.000      |
| 502 | GOBP-CELLULAR-RESPONSE-TO-BIOTIC-STIMULUS          | GO-0071216    | 8    | -0.519658 | -1.170445 | 0.248724  | 0.706499  | 1.000      |
| 503 | GOBP-NEGATIVE-REGULATION-OF-GENE-EXPRESSION        | GO-0010629    | 12   | -0.467989 | -1.171800 | 0.271166  | 0.705439  | 1.000      |
| 504 | GOBP-INTRACELLULAR-RECEPTOR-SIGNALING-PATHWAY      | GO-0030522    | 5    | -0.598187 | -1.171837 | 0.237964  | 0.708621  | 1.000      |
| 505 | GOBP-REGULATION-OF-PROTEIN-LOCALIZATION            | GO-0032880    | 18   | -0.435204 | -1.176950 | 0.258701  | 0.695876  | 1.000      |
| 506 | GOBP-CELLULAR-RESPONSE-TO-DNA-DAMAGE-STIMULUS      | GO-0006974    | 5    | -0.593801 | -1.177345 | 0.240766  | 0.697846  | 1.000      |
| 507 | GOBP-MULTI-MULTICELLULAR-ORGANISM-PROCESS          | GO-0044706    | 8    | -0.525535 | -1.180214 | 0.256281  | 0.692455  | 1.000      |
| 508 | GOBP-BLOOD-VESSEL-ENDOTHELIAL-CELL-MIGRATION       | GO-0043534    | 8    | -0.527351 | -1.180496 | 0.250318  | 0.694796  | 1.000      |
| 509 | GOBP-POSITIVE-REGULATION-OF-IMMUNE-RESPONSE        | GO-0050778    | 9    | -0.505468 | -1.180894 | 0.263094  | 0.696809  | 1.000      |
| 510 | GOBP-ENDOTHELIAL-CELL-MIGRATION                    | GO-0043542    | 8    | -0.527351 | -1.183422 | 0.227895  | 0.691892  | 1.000      |
| 511 | GOBP-INTRACELLULAR-TRANSPORT                       | GO-0046907    | 11   | -0.490728 | -1.183502 | 0.256442  | 0.694954  | 1.000      |
| 512 | GOBP-NEURON-DEATH                                  | GO-0070997    | 18   | -0.433687 | -1.186376 | 0.258427  | 0.689069  | 1.000      |
| 513 | REACTOME-NEURONAL-SYSTEM                           | R-RNO-112316  | 26   | -0.415133 | -1.186667 | 0.232533  | 0.691378  | 1.000      |

Continuation of Table S18

| NAME                                                  | ID            | SIZE | ES        | NES       | NOM.p.val | FDR.q.val | FWER.p.val |
|-------------------------------------------------------|---------------|------|-----------|-----------|-----------|-----------|------------|
| 514 GOBP-REGULATION-OF-CELLULAR-PROTEIN-LOCALIZATION  | GO-1903827    | 12   | -0.475343 | -1.186710 | 0.257414  | 0.694621  | 1.000      |
| 515 GOBP-POSITIVE-REGULATION-OF-EPITHELIAL-CELL-MI... | GO-0010634    | 5    | -0.601667 | -1.189394 | 0.227901  | 0.689628  | 1.000      |
| 516 GOBP-POSITIVE-REGULATION-OF-LOCOMOTION            | GO-0040017    | 11   | -0.488367 | -1.189772 | 0.262470  | 0.691892  | 1.000      |
| 517 REACTOME-TRAFFICKING-OF-AMPA-RECEPTORS            | R-RNO-399719  | 11   | -0.484541 | -1.190284 | 0.245466  | 0.693518  | 1.000      |
| 518 GOBP-POSITIVE-REGULATION-OF-APOPTOTIC-SIGNALIN... | GO-2001235    | 5    | -0.607085 | -1.193152 | 0.219945  | 0.687550  | 1.000      |
| 519 GOBP-RESPONSE-TO-TUMOR-NECROSIS-FACTOR            | GO-0034612    | 7    | -0.540302 | -1.193449 | 0.221790  | 0.690117  | 1.000      |
| 520 GOBP-POSITIVE-REGULATION-OF-RESPONSE-TO-EXTERN... | GO-0032103    | 9    | -0.510972 | -1.195092 | 0.250000  | 0.688196  | 1.000      |
| 521 GOBP-REGULATION-OF-NEURON-DIFFERENTIATION         | GO-0045664    | 5    | -0.611769 | -1.196472 | 0.209524  | 0.687116  | 1.000      |
| 522 GOBP-POSITIVE-REGULATION-OF-PROTEOLYSIS           | GO-0045862    | 8    | -0.536159 | -1.196725 | 0.237726  | 0.689679  | 1.000      |
| 523 GOBP-NEGATIVE-REGULATION-OF-CELL-DEATH            | GO-0060548    | 22   | -0.424765 | -1.200169 | 0.239824  | 0.682420  | 1.000      |
| 524 GOBP-ANATOMICAL-STRUCTURE-FORMATION-INVOLVED-I... | GO-0048646    | 20   | -0.428956 | -1.201419 | 0.223799  | 0.681931  | 1.000      |
| 525 GOBP-POSITIVE-REGULATION-OF-CELL-DEATH            | GO-0010942    | 19   | -0.438592 | -1.203814 | 0.236486  | 0.677882  | 1.000      |
| 526 GOBP-PLATELET-ACTIVATION                          | GO-0030168    | 6    | -0.580264 | -1.204079 | 0.206675  | 0.680490  | 1.000      |
| 527 GOBP-HOMEOSTATIC-PROCESS                          | GO-0042592    | 31   | -0.405974 | -1.204617 | 0.214208  | 0.682204  | 1.000      |
| 528 GOBP-POSITIVE-REGULATION-OF-PEPTIDASE-ACTIVITY    | GO-0010952    | 7    | -0.555656 | -1.205996 | 0.197659  | 0.681377  | 1.000      |
| 529 GOBP-PROTEIN-MODIFICATION-BY-SMALL-PROTEIN-CON... | GO-0032446    | 6    | -0.580344 | -1.208274 | 0.204515  | 0.677691  | 1.000      |
| 530 GOBP-TISSUE-MIGRATION                             | GO-0090130    | 9    | -0.515267 | -1.208624 | 0.224335  | 0.680283  | 1.000      |
| 531 GOBP-NEGATIVE-REGULATION-OF-CELL-POPULATION-PR... | GO-0008285    | 9    | -0.528002 | -1.212078 | 0.219603  | 0.672566  | 1.000      |
| 532 GOBP-REGULATION-OF-CYSTEINE-TYPE-ENDOPEPTIDASE... | GO-2000116    | 9    | -0.514813 | -1.212329 | 0.213936  | 0.675292  | 1.000      |
| 533 GOBP-ANIMAL-ORGAN-MORPHOGENESIS                   | GO-0009887    | 12   | -0.488471 | -1.213169 | 0.210094  | 0.676180  | 1.000      |
| 534 GOBP-CELLULAR-RESPONSE-TO-KETONE                  | GO-1901655    | 5    | -0.614852 | -1.213389 | 0.202740  | 0.679147  | 1.000      |
| 535 GOBP-ERK1-AND-ERK2-CASCADE                        | GO-0070371    | 5    | -0.596592 | -1.214516 | 0.201058  | 0.678838  | 1.000      |
| 536 GOBP-MUSCLE-SYSTEM-PROCESS                        | GO-0003012    | 9    | -0.526770 | -1.215073 | 0.223844  | 0.680489  | 1.000      |
| 537 GOBP-PEPTIDYL-AMINO-ACID-MODIFICATION             | GO-0018193    | 22   | -0.426557 | -1.218703 | 0.215664  | 0.672063  | 1.000      |
| 538 GOBP-REGULATION-OF-MUSCLE-ADAPTATION              | GO-0043502    | 5    | -0.617149 | -1.220319 | 0.191257  | 0.670538  | 1.000      |
| 539 GOBP-NEGATIVE-REGULATION-OF-CELL-PROJECTION-OR... | GO-0031345    | 5    | -0.620292 | -1.223452 | 0.195973  | 0.663858  | 1.000      |
| 540 REACTOME-INTEGRATION-OF-ENERGY-METABOLISM         | R-RNO-163685  | 5    | -0.628517 | -1.223640 | 0.195739  | 0.666816  | 1.000      |
| 541 GOBP-POSITIVE-REGULATION-OF-CYSTEINE-TYPE-ENDO... | GO-2001056    | 7    | -0.555656 | -1.225671 | 0.190039  | 0.663673  | 1.000      |
| 542 GOBP-MUSCLE-ADAPTATION                            | GO-0043500    | 5    | -0.617149 | -1.228946 | 0.171034  | 0.656684  | 1.000      |
| 543 REACTOME-TRANSCRIPTIONAL-REGULATION-BY-TP53       | R-RNO-3700989 | 6    | -0.585918 | -1.229184 | 0.205298  | 0.659622  | 1.000      |
| 544 GOBP-REGULATION-OF-MYELOID-LEUKOCYTE-DIFFERENT... | GO-0002761    | 8    | -0.549896 | -1.229196 | 0.200260  | 0.663368  | 1.000      |
| 545 GOBP-REGULATION-OF-RESPONSE-TO-EXTERNAL-STIMULUS  | GO-0032101    | 15   | -0.477336 | -1.231059 | 0.194866  | 0.660977  | 1.000      |
| 546 GOBP-ERBB-SIGNALING-PATHWAY                       | GO-0038127    | 5    | -0.630523 | -1.232083 | 0.181579  | 0.661175  | 1.000      |
| 547 REACTOME-TRAFFICKING-OF-GLUR2-CONTAINING-AMPA-... | R-RNO-416993  | 8    | -0.549668 | -1.234836 | 0.188535  | 0.656042  | 1.000      |
| 548 GOBP-NEGATIVE-REGULATION-OF-PROTEIN-METABOLIC-... | GO-0051248    | 20   | -0.445174 | -1.235514 | 0.198864  | 0.657596  | 1.000      |
| 549 GOBP-REGULATION-OF-CELL-DIFFERENTIATION           | GO-0045595    | 36   | -0.414412 | -1.245504 | 0.173220  | 0.628594  | 1.000      |
| 550 REACTOME-SIGNALING-BY-NTRK5                       | R-RNO-166520  | 18   | -0.463043 | -1.246975 | 0.189655  | 0.627649  | 1.000      |
| 551 GOBP-RESPONSE-TO-RADIATION                        | GO-0009314    | 13   | -0.490165 | -1.251703 | 0.193357  | 0.616164  | 1.000      |
| 552 GOBP-PERIPHERAL-NERVOUS-SYSTEM-DEVELOPMENT        | GO-0007422    | 9    | -0.537156 | -1.251859 | 0.190898  | 0.619397  | 1.000      |
| 553 GOBP-NEGATIVE-REGULATION-OF-RESPONSE-TO-STIMULUS  | GO-0048585    | 16   | -0.475600 | -1.253112 | 0.178322  | 0.619324  | 1.000      |
| 554 GOBP-POSITIVE-REGULATION-OF-BINDING               | GO-0051099    | 6    | -0.607606 | -1.253645 | 0.163073  | 0.621480  | 1.000      |
| 555 REACTOME-G-ALPHA-Q-SIGNALING-EVENTS               | R-RNO-416476  | 6    | -0.607757 | -1.254597 | 0.171123  | 0.621983  | 1.000      |
| 556 GOBP-TUBE-DEVELOPMENT                             | GO-0035295    | 18   | -0.463594 | -1.256568 | 0.164948  | 0.619430  | 1.000      |



Continuation of Table S18

| NAME                                                       | ID            | SIZE | ES        | NES       | NOM.p.val | FDR.q.val | FWER.p.val |
|------------------------------------------------------------|---------------|------|-----------|-----------|-----------|-----------|------------|
| 557 REACTOME_OPIOID_SIGNALLING                             | R-RNO-111885  | 12   | -0.512486 | -1.256768 | 0.163070  | 0.622511  | 1.000      |
| 558 GOBP_SPROUTING_ANGIOGENESIS                            | GO-0002040    | 5    | -0.644819 | -1.258721 | 0.154891  | 0.619889  | 1.000      |
| 559 GOBP_POSITIVE_REGULATION_OF_PRL_MIRNA_TRANSCRIPTION... | GO-1902895    | 7    | -0.578642 | -1.259399 | 0.178893  | 0.621653  | 1.000      |
| 560 GOBP_PRL_MIRNA_TRANSCRIPTION_BY_RNA_POLYMERASE_II      | GO-0061614    | 7    | -0.578642 | -1.259705 | 0.163636  | 0.624529  | 1.000      |
| 561 GOBP_PEPTIDYL_LYSINE_MODIFICATION                      | GO-0018205    | 5    | -0.631805 | -1.260173 | 0.151915  | 0.626985  | 1.000      |
| 562 REACTOME_SIGNALING_BY_RECEPTOR_TYROSINE_KINASES        | R-RNO-9006934 | 26   | -0.436353 | -1.260465 | 0.177560  | 0.630053  | 1.000      |
| 563 GOBP_RESPONSE_TO_INSULIN                               | GO-0032868    | 5    | -0.635883 | -1.261164 | 0.154263  | 0.631720  | 1.000      |
| 564 GOBP_REGULATION_OF_CELL_CYCLE_PROCESS                  | GO-0010564    | 5    | -0.634288 | -1.261231 | 0.166893  | 0.635565  | 1.000      |
| 565 GOBP_CELL_CYCLE                                        | GO-0007049    | 21   | -0.449087 | -1.267321 | 0.149490  | 0.619114  | 1.000      |
| 566 GOBP_REGULATION_OF_RESPONSE_TO_STRESS                  | GO-0080134    | 19   | -0.462761 | -1.271287 | 0.164798  | 0.609774  | 1.000      |
| 567 GOBP_NEGATIVE_REGULATION_OF_CELLULAR_COMPONENT...      | GO-0051129    | 11   | -0.516756 | -1.271363 | 0.167651  | 0.613599  | 1.000      |
| 568 GOBP_CELL_ACTIVATION                                   | GO-0001775    | 21   | -0.450516 | -1.274195 | 0.162042  | 0.608086  | 1.000      |
| 569 GOBP_RESPONSE_TO ABIOTIC STIMULUS                      | GO-0009628    | 27   | -0.436302 | -1.278149 | 0.145394  | 0.598101  | 1.000      |
| 570 GOBP_RESPONSE_TO_KETONE                                | GO-1901654    | 7    | -0.586229 | -1.278803 | 0.160804  | 0.599806  | 1.000      |
| 571 GOBP_CARBOHYDRATE_HOMEOSTASIS                          | GO-0033500    | 7    | -0.583299 | -1.281675 | 0.141772  | 0.594322  | 1.000      |
| 572 GOBP_RESPONSE_TO_CALCIIUM_ION                          | GO-0051592    | 6    | -0.616889 | -1.282772 | 0.146405  | 0.594890  | 1.000      |
| 573 GOBP_MULTIORGANISM_PROCESS                             | GO-0051704    | 16   | -0.476899 | -1.283422 | 0.154913  | 0.596759  | 1.000      |
| 574 GOBP_COAGULATION                                       | GO-0050817    | 8    | -0.572784 | -1.287836 | 0.143392  | 0.585801  | 1.000      |
| 575 GOBP_POSITIVE_REGULATION_OF_CELLULAR_PROTEIN...        | GO-1903829    | 7    | -0.600093 | -1.290053 | 0.136483  | 0.582333  | 1.000      |
| 576 GOBP_RESPONSE_TO_ENDOGENOUS_STIMULUS                   | GO-0009719    | 34   | -0.428934 | -1.290251 | 0.136752  | 0.585741  | 1.000      |
| 577 REACTOME_NGF_STIMULATED_TRANSCRIPTION                  | R-RNO-9031628 | 9    | -0.554841 | -1.291909 | 0.137717  | 0.584166  | 1.000      |
| 578 GOBP_MUSCLE_TISSUE_DEVELOPMENT                         | GO-0060537    | 11   | -0.538445 | -1.297069 | 0.118873  | 0.570823  | 1.000      |
| 579 GOBP_DEVELOPMENTAL_PROCESS_INVOLVED_IN_REPRODU...      | GO-0003006    | 11   | -0.537393 | -1.299761 | 0.132616  | 0.566497  | 1.000      |
| 580 GOBP_DEFENSE_RESPONSE_TO_OTHER_ORGANISM                | GO-0098542    | 9    | -0.558386 | -1.301892 | 0.118812  | 0.563558  | 1.000      |
| 581 GOBP_REGULATION_OF_SMALL_MOLECULE_METABOLIC_PR...      | GO-0062012    | 9    | -0.561030 | -1.302998 | 0.118306  | 0.563899  | 1.000      |
| 582 GOBP_REGULATION_OF_LIPID_METABOLIC_PROCESS             | GO-0019216    | 7    | -0.600028 | -1.304611 | 0.124679  | 0.562481  | 1.000      |
| 583 GOBP_MONONUCLEAR_CELL_DIFFERENTIATION                  | GO-1903131    | 7    | -0.598281 | -1.304773 | 0.149874  | 0.565999  | 1.000      |
| 584 GOBP_INNATE_IMMUNE_RESPONSE                            | GO-0045087    | 7    | -0.607080 | -1.312189 | 0.129887  | 0.546105  | 1.000      |
| 585 GOBP_REGULATION_OF_MITOTIC_CELL_CYCLE                  | GO-0007346    | 5    | -0.663435 | -1.313064 | 0.125000  | 0.547133  | 1.000      |
| 586 GOBP_ESTABLISHMENT_OF_PROTEIN_LOCALIZATION_TO...       | GO-0072594    | 6    | -0.624114 | -1.313382 | 0.106289  | 0.550329  | 1.000      |
| 587 GOBP_MITOTIC_CELL_CYCLE                                | GO-0000278    | 10   | -0.554408 | -1.314412 | 0.114673  | 0.551153  | 1.000      |
| 588 GOBP_MULTICELLULAR_ORGANISM_REPRODUCTION               | GO-0032504    | 12   | -0.519882 | -1.315770 | 0.148681  | 0.550967  | 1.000      |
| 589 GOBP_NEUROTROPHIN_SIGNALING_PATHWAY                    | GO-0038179    | 6    | -0.633634 | -1.317171 | 0.111111  | 0.550374  | 1.000      |
| 590 GOBP_REGULATION_OF_HEMOPOIESIS                         | GO-1903706    | 10   | -0.551038 | -1.320645 | 0.135802  | 0.543056  | 1.000      |
| 591 GOBP_TRANSMEMBRANE_RECEPTOR_PROTEIN_TYROSINE_K...      | GO-0007169    | 19   | -0.485845 | -1.322687 | 0.144495  | 0.540418  | 1.000      |
| 592 GOBP_CYTOKINE_MEDIATED_SIGNALING_PATHWAY               | GO-0019221    | 16   | -0.493639 | -1.322800 | 0.119590  | 0.544288  | 1.000      |
| 593 GOBP_LYMPHOCYTE_ACTIVATION                             | GO-0046649    | 9    | -0.571244 | -1.323303 | 0.138650  | 0.546848  | 1.000      |
| 594 GOBP_REGULATION_OF_IMMUNE_RESPONSE                     | GO-0050776    | 12   | -0.536988 | -1.323476 | 0.124088  | 0.550627  | 1.000      |
| 595 GOBP_NEUROTROPHIN_TRK_RECEPTOR_SIGNALING_PATHWAY       | GO-0048011    | 6    | -0.633634 | -1.323949 | 0.115538  | 0.553294  | 1.000      |
| 596 REACTOME_G_PROTEIN_MEDIATED_EVENTS                     | R-RNO-112040  | 9    | -0.571028 | -1.324025 | 0.120988  | 0.557562  | 1.000      |
| 597 GOBP_NEGATIVE_REGULATION_OF_TRANSCRIPTION_BY_R...      | GO-0000122    | 10   | -0.546933 | -1.325030 | 0.125945  | 0.558490  | 1.000      |
| 598 GOBP_POSITIVE_REGULATION_OF_ENDOTHELIAL_CELL_P...      | GO-0001938    | 6    | -0.637985 | -1.326998 | 0.130890  | 0.556233  | 1.000      |
| 599 GOBP_POSITIVE_REGULATION_OF_GENE_EXPRESSION            | GO-0010628    | 16   | -0.499931 | -1.329373 | 0.124857  | 0.552649  | 1.000      |

Continuation of Table S18

|     | NAME                                              | ID            | SIZE | ES        | NES       | NOM.p.val | FDR.q.val | FWER.p.val |
|-----|---------------------------------------------------|---------------|------|-----------|-----------|-----------|-----------|------------|
| 600 | GOBP-REGULATION-OF-CELLULAR-RESPONSE-TO-STRESS    | GO-0080135    | 9    | -0.579178 | -1.333126 | 0.120585  | 0.544455  | 1.000      |
| 601 | GOBP-RESPONSE-TO-OXYGEN-LEVELS                    | GO-0070482    | 8    | -0.591888 | -1.335357 | 0.114103  | 0.541322  | 1.000      |
| 602 | HALLMARK-TNFA-SIGNALING-VIA-NFKB                  | M590          | 14   | -0.513846 | -1.335793 | 0.122970  | 0.544412  | 1.000      |
| 603 | GOBP-NEGATIVE-REGULATION-OF-HYDROLASE-ACTIVITY    | GO-0051346    | 11   | -0.542857 | -1.339425 | 0.108935  | 0.536785  | 1.000      |
| 604 | GOBP-SKELETAL-MUSCLE-ORGAN-DEVELOPMENT            | GO-0060538    | 5    | -0.685491 | -1.340974 | 0.094415  | 0.536130  | 1.000      |
| 605 | GOBP-POSITIVE-REGULATION-OF-IMMUNE-SYSTEM-PROCESS | GO-0002684    | 18   | -0.505520 | -1.346063 | 0.090498  | 0.523633  | 1.000      |
| 606 | GOBP-REGULATION-OF-WNT-SIGNALING-PATHWAY          | GO-0030111    | 5    | -0.688480 | -1.346639 | 0.085754  | 0.526443  | 1.000      |
| 607 | GOBP-CELLULAR-RESPONSE-TO-PEPTIDE-HORMONE-STIM... | GO-0071375    | 9    | -0.586567 | -1.347261 | 0.103362  | 0.529159  | 1.000      |
| 608 | GOBP-CELL-ACTIVATION-INVOLVED-IN-IMMUNE-RESPONSE  | GO-0002263    | 6    | -0.654873 | -1.347995 | 0.087075  | 0.531460  | 1.000      |
| 609 | GOBP-CELLULAR-RESPONSE-TO-LIPID                   | GO-0071396    | 15   | -0.509074 | -1.349005 | 0.104953  | 0.533025  | 1.000      |
| 610 | GOBP-NEGATIVE-REGULATION-OF-NUCLEOBASE-CONTAIN... | GO-0045934    | 13   | -0.545054 | -1.349650 | 0.109027  | 0.535637  | 1.000      |
| 611 | REACTOME-NEUTROPHIL-DEGRANULATION                 | R-RNO-6798695 | 6    | -0.654873 | -1.349777 | 0.098667  | 0.540153  | 1.000      |
| 612 | GOBP-CELLULAR-GLUCOSE-HOMEOSTASIS                 | GO-0001678    | 5    | -0.685186 | -1.350977 | 0.084337  | 0.540837  | 1.000      |
| 613 | GOBP-POSITIVE-REGULATION-OF-MULTICELLULAR-ORGA... | GO-0051240    | 32   | -0.458485 | -1.351387 | 0.114754  | 0.544371  | 1.000      |
| 614 | GOBP-REGULATION-OF-CELL-CYCLE                     | GO-0051726    | 13   | -0.535257 | -1.351941 | 0.109606  | 0.547388  | 1.000      |
| 615 | GOBP-LIPID-BIOSYNTHETIC-PROCESS                   | GO-0008610    | 6    | -0.659353 | -1.353785 | 0.083879  | 0.545991  | 1.000      |
| 616 | GOBP-CELL-CELL-SIGNALING-BY-WNT                   | GO-0198738    | 7    | -0.624074 | -1.356213 | 0.090561  | 0.542985  | 1.000      |
| 617 | GOBP-NEGATIVE-REGULATION-OF-BIOSYNTHETIC-PROCESS  | GO-0009890    | 13   | -0.533960 | -1.357306 | 0.093859  | 0.544293  | 1.000      |
| 618 | GOBP-CELLULAR-RESPONSE-TO-EXTRACELLULAR-STIMULUS  | GO-0031668    | 8    | -0.602057 | -1.361504 | 0.091925  | 0.534450  | 1.000      |
| 619 | GOBP-T-CELL-ACTIVATION                            | GO-0042110    | 8    | -0.605059 | -1.361838 | 0.094697  | 0.538744  | 1.000      |
| 620 | GOBP-CELLULAR-RESPONSE-TO-STARVATION              | GO-0009267    | 5    | -0.698734 | -1.363189 | 0.076398  | 0.539616  | 1.000      |
| 621 | GOBP-REGULATION-OF-LIPID-BIOSYNTHETIC-PROCESS     | GO-0046890    | 6    | -0.659353 | -1.364065 | 0.093176  | 0.541956  | 1.000      |
| 622 | GOBP-MULTICELLULAR-ORGANISMAL-HOMEOSTASIS         | GO-0048871    | 12   | -0.547096 | -1.365463 | 0.098321  | 0.542740  | 1.000      |
| 623 | GOBP-POSITIVE-REGULATION-OF-CYTOKINE-PRODUCTION   | GO-0001819    | 7    | -0.632302 | -1.365757 | 0.097345  | 0.547173  | 1.000      |
| 624 | GOBP-REPRODUCTION                                 | GO-0000003    | 18   | -0.503871 | -1.366529 | 0.091954  | 0.550180  | 1.000      |
| 625 | GOBP-ENDOTHELIAL-CELL-PROLIFERATION               | GO-0001935    | 8    | -0.613882 | -1.366962 | 0.093710  | 0.554124  | 1.000      |
| 626 | GOBP-AGING                                        | GO-0007568    | 13   | -0.537121 | -1.367624 | 0.098301  | 0.557470  | 1.000      |
| 627 | REACTOME-CA-DEPENDENT-EVENTS                      | R-RNO-111996  | 8    | -0.613456 | -1.367630 | 0.077419  | 0.563507  | 1.000      |
| 628 | GOBP-MYELOID-LEUKOCYTE-MEDIATED-IMMUNITY          | GO-0002444    | 6    | -0.654873 | -1.368569 | 0.095816  | 0.566194  | 1.000      |
| 629 | GOBP-CELL-CYCLE-PROCESS                           | GO-0022402    | 11   | -0.565366 | -1.369923 | 0.094645  | 0.566818  | 1.000      |
| 630 | GOBP-CELLULAR-MACROMOLECULE-CATABOLIC-PROCESS     | GO-0044265    | 6    | -0.665301 | -1.373403 | 0.099355  | 0.560339  | 1.000      |
| 631 | REACTOME-PLATELET-ACTIVATION-SIGNALING-AND-AGG... | R-HSA-76002   | 7    | -0.625394 | -1.373762 | 0.096306  | 0.565522  | 1.000      |
| 632 | GOBP-CELL-POPULATION-PROLIFERATION                | GO-0008283    | 31   | -0.468222 | -1.381003 | 0.088267  | 0.544315  | 1.000      |
| 633 | GOBP-REGULATION-OF-ANION-TRANSPORT                | GO-0044070    | 20   | -0.489206 | -1.382665 | 0.085106  | 0.544417  | 1.000      |
| 634 | GOBP-CIRCULATORY-SYSTEM-DEVELOPMENT               | GO-0072359    | 21   | -0.498398 | -1.384517 | 0.084081  | 0.544142  | 1.000      |
| 635 | GOBP-POSITIVE-REGULATION-OF-EPITHELIAL-CELL-PR... | GO-0050679    | 7    | -0.625349 | -1.386790 | 0.079324  | 0.542269  | 1.000      |
| 636 | GOBP-CHROMATIN-ORGANIZATION                       | GO-0006325    | 5    | -0.695507 | -1.387774 | 0.055935  | 0.545083  | 1.000      |
| 637 | GOBP-POSITIVE-REGULATION-OF-CELL-POPULATION-PR... | GO-0008284    | 21   | -0.498657 | -1.389268 | 0.075028  | 0.546130  | 1.000      |
| 638 | GOBP-PROTEIN-LOCALIZATION-TO-ORGANELLE            | GO-0033365    | 9    | -0.605475 | -1.390180 | 0.070263  | 0.549206  | 1.000      |
| 639 | GOBP-MUSCLE-ORGAN-DEVELOPMENT                     | GO-0007517    | 9    | -0.602148 | -1.390990 | 0.073658  | 0.553119  | 1.000      |
| 640 | GOBP-ENZYMELINKED-RECEPTOR-PROTEIN-SIGNALING....  | GO-0007167    | 24   | -0.489849 | -1.398259 | 0.064978  | 0.531454  | 1.000      |
| 641 | GOBP-POSITIVE-REGULATION-OF-ANION-TRANSPORT       | GO-1903793    | 9    | -0.602035 | -1.398876 | 0.087763  | 0.535511  | 1.000      |
| 642 | GOBP-RESPONSE-TO-STARVATION                       | GO-0042594    | 5    | -0.698734 | -1.405055 | 0.064171  | 0.519721  | 1.000      |

Continuation of Table S18

| NAME                                                  | ID            | SIZE | ES        | NES       | NOM.p.val | FDR.q.val | FWER.p.val |
|-------------------------------------------------------|---------------|------|-----------|-----------|-----------|-----------|------------|
| 643 GOBP-REGULATION-OF-PROTEIN-STABILITY              | GO-0031647    | 5    | -0.704817 | -1.411878 | 0.068966  | 0.502191  | 1.000      |
| 644 GOBP-RESPONSE-TO-OXYGEN-CONTAINING-COMPOUND       | GO-1901700    | 39   | -0.467609 | -1.426152 | 0.051447  | 0.457789  | 1.000      |
| 645 GOBP-RESPONSE-TO-LIPID                            | GO-0033993    | 19   | -0.514598 | -1.429730 | 0.061017  | 0.451814  | 1.000      |
| 646 GOBP-CELLULAR-RESPONSE-TO-ABIOTIC-STIMULUS        | GO-0071214    | 7    | -0.656175 | -1.434210 | 0.059627  | 0.442607  | 1.000      |
| 647 GOBP-CELLULAR-RESPONSE-TO-PEPTIDE                 | GO-1901653    | 13   | -0.567004 | -1.434478 | 0.051435  | 0.447567  | 1.000      |
| 648 GOBP-MYELOID-LEUKOCYTE-DIFFERENTIATION            | GO-0002573    | 11   | -0.591863 | -1.435353 | 0.056931  | 0.451116  | 1.000      |
| 649 GOBP-REGULATION-OF-MYELOID-CELL-DIFFERENTIATION   | GO-0045637    | 9    | -0.620915 | -1.436069 | 0.065854  | 0.455236  | 1.000      |
| 650 REACTOME-ESTROGEN-DEPENDENT-NUCLEAR-EVENTS-DOW... | R-RNO-9634638 | 5    | -0.731514 | -1.437364 | 0.042553  | 0.457334  | 1.000      |
| 651 GOBP-RESPONSE-TO-INORGANIC-SUBSTANCE              | GO-0010035    | 19   | -0.515211 | -1.438111 | 0.057175  | 0.461411  | 1.000      |
| 652 GOBP-RESPONSE-TO-NITROGEN-COMPOUND                | GO-1901698    | 34   | -0.481730 | -1.438718 | 0.048077  | 0.466002  | 1.000      |
| 653 GOBP-VASCULATURE-DEVELOPMENT                      | GO-0001944    | 17   | -0.541411 | -1.447895 | 0.052692  | 0.441139  | 1.000      |
| 654 GOBP-REGULATION-OF-IMMUNE-SYSTEM-PROCESS          | GO-0002682    | 21   | -0.517109 | -1.448162 | 0.060502  | 0.446920  | 1.000      |
| 655 GOBP-TISSUE-HOMEOSTASIS                           | GO-0001894    | 5    | -0.730595 | -1.449404 | 0.034483  | 0.449333  | 1.000      |
| 656 GOBP-CARBOHYDRATE-BIOSYNTHETIC-PROCESS            | GO-0016051    | 5    | -0.735446 | -1.450579 | 0.046703  | 0.452508  | 1.000      |
| 657 GOBP-CELLULAR-RESPONSE-TO-INORGANIC-SUBSTANCE     | GO-0071241    | 11   | -0.595297 | -1.452256 | 0.038694  | 0.449702  | 1.000      |
| 658 GOBP-REGULATION-OF-CARBOHYDRATE-METABOLIC-PROCESS | GO-0006109    | 5    | -0.735446 | -1.455973 | 0.037241  | 0.447052  | 1.000      |
| 659 GOBP-CELLULAR-RESPONSE-TO-EXTERNAL-STIMULUS       | GO-0071496    | 10   | -0.613285 | -1.456497 | 0.041262  | 0.452565  | 1.000      |
| 660 GOBP-RESPONSE-TO-MOLECULE-OF-BACTERIAL-ORIGIN     | GO-0002237    | 13   | -0.573657 | -1.457839 | 0.049763  | 0.455531  | 1.000      |
| 661 GOBP-APOPTOTIC-SIGNALING-PATHWAY                  | GO-0097190    | 15   | -0.557619 | -1.458684 | 0.039261  | 0.459883  | 1.000      |
| 662 GOBP-REGULATION-OF-CARBOHYDRATE-BIOSYNTHETIC-P... | GO-0043255    | 5    | -0.735446 | -1.459505 | 0.047490  | 0.464199  | 1.000      |
| 663 HALLMARK-UV-RESPONSE-UP                           | M5941         | 5    | -0.733690 | -1.464476 | 0.037344  | 0.454873  | 1.000      |
| 664 REACTOME-ESR-MEDIATED-SIGNALING                   | R-RNO-8939211 | 8    | -0.652815 | -1.469482 | 0.049869  | 0.445088  | 1.000      |
| 665 REACTOME-CELL-CYCLE                               | R-RNO-1640170 | 6    | -0.703607 | -1.470180 | 0.042553  | 0.451373  | 1.000      |
| 666 GOBP-RESPONSE-TO-OXIDATIVE-STRESS                 | GO-0006979    | 8    | -0.658290 | -1.471982 | 0.051414  | 0.453490  | 1.000      |
| 667 REACTOME-SIGNALING-BY-NUCLEAR-RECEPTORS           | R-RNO-9006931 | 8    | -0.652815 | -1.473035 | 0.048969  | 0.457839  | 1.000      |
| 668 REACTOME-NUCLEAR-EVENTS-KINASE-AND-TRANSCRIPTI... | R-RNO-198725  | 11   | -0.605835 | -1.475356 | 0.042908  | 0.458328  | 1.000      |
| 669 GOBP-RESPONSE-TO-BACTERIUM                        | GO-0009617    | 13   | -0.572657 | -1.480237 | 0.035294  | 0.448426  | 1.000      |
| 670 GOBP-DNA-METABOLIC-PROCESS                        | GO-0006259    | 6    | -0.704260 | -1.483121 | 0.036896  | 0.446954  | 1.000      |
| 671 GOBP-NEGATIVE-REGULATION-OF-CELL-DIFFERENTIATION  | GO-0045596    | 13   | -0.596055 | -1.485279 | 0.042503  | 0.448219  | 1.000      |
| 672 GOBP-CELLULAR-RESPONSE-TO-CADMIUM-ION             | GO-0071276    | 5    | -0.753648 | -1.486642 | 0.036697  | 0.452443  | 1.000      |
| 673 GOBP-RESPONSE-TO-GROWTH-FACTOR                    | GO-0070848    | 18   | -0.545097 | -1.487974 | 0.038117  | 0.456843  | 1.000      |
| 674 GOBP-RESPONSE-TO-REACTIVE-OXYGEN-SPECIES          | GO-0000302    | 8    | -0.658290 | -1.488636 | 0.049808  | 0.464979  | 1.000      |
| 675 GOBP-CELLULAR-RESPONSE-TO-NITROGEN-COMPOUND       | GO-1901699    | 20   | -0.545764 | -1.502901 | 0.030067  | 0.420395  | 1.000      |
| 676 GOBP-NEGATIVE-REGULATION-OF-DEVELOPMENTAL-PROCESS | GO-0051093    | 13   | -0.596055 | -1.505536 | 0.027187  | 0.419574  | 1.000      |
| 677 GOBP-CELLULAR-RESPONSE-TO-HORMONE-STIMULUS        | GO-0032870    | 11   | -0.625261 | -1.505621 | 0.028916  | 0.429250  | 1.000      |
| 678 GOBP-ENDOMEMBRANE-SYSTEM-ORGANIZATION             | GO-0010256    | 6    | -0.729473 | -1.507025 | 0.028461  | 0.434377  | 1.000      |
| 679 REACTOME-MAPK-TARGETS-NUCLEAR-EVENTS-MEDIATED-... | R-HSA-450282  | 5    | -0.761795 | -1.511425 | 0.023448  | 0.427747  | 1.000      |
| 680 GOBP-POSITIVE-REGULATION-OF-NUCLEOBASE-CONTAIN... | GO-0045935    | 28   | -0.519870 | -1.513458 | 0.029001  | 0.430795  | 1.000      |
| 681 GOBP-CELLULAR-RESPONSE-TO-REACTIVE-OXYGEN-SPECIES | GO-0034614    | 7    | -0.705586 | -1.517514 | 0.029040  | 0.426558  | 1.000      |
| 682 REACTOME-EXTRA-NUCLEAR-ESTROGEN-SIGNALING         | R-RNO-9009391 | 7    | -0.697905 | -1.518169 | 0.025990  | 0.435436  | 1.000      |
| 683 GOBP-RESPONSE-TO-PEPTIDE-HORMONE                  | GO-0043434    | 13   | -0.587908 | -1.524988 | 0.027091  | 0.421098  | 1.000      |
| 684 GOBP-RESPONSE-TO-PEPTIDE                          | GO-1901652    | 18   | -0.562621 | -1.528581 | 0.018931  | 0.419428  | 1.000      |
| 685 GOBP-MYELOID-CELL-DIFFERENTIATION                 | GO-0030099    | 13   | -0.607730 | -1.529383 | 0.023952  | 0.428292  | 1.000      |

Continuation of Table S18

| NAME                                                  | ID            | SIZE | ES        | NES       | NOM.p.val | FDR.q.val | FWER.p.val |
|-------------------------------------------------------|---------------|------|-----------|-----------|-----------|-----------|------------|
| 686 GOBP-ANATOMICAL-STRUCTURE-HOMEOSTASIS             | GO-0060249    | 7    | -0.706786 | -1.536390 | 0.028169  | 0.414164  | 1.000      |
| 687 GOBP-RESPONSE.TO.ORGANIC-CYCLIC-COMPOUND          | GO-0014070    | 20   | -0.551466 | -1.538216 | 0.019473  | 0.420615  | 1.000      |
| 688 REACTOME-SENESCENCE-ASSOCIATED-SECRETORY-PHENO... | R-RNO-2559582 | 6    | -0.743931 | -1.544775 | 0.022457  | 0.408269  | 1.000      |
| 689 GOBP-RESPONSE.TO.BIOTIC-STIMULUS                  | GO-0009607    | 17   | -0.575603 | -1.548995 | 0.022599  | 0.406303  | 1.000      |
| 690 GOBP-RESPONSE.TO.HORMONE                          | GO-0009725    | 20   | -0.563460 | -1.551259 | 0.015730  | 0.412053  | 1.000      |
| 691 GOBP-POSITIVE-REGULATION.OF.BIOSYNTHETIC-PROCESS  | GO-0009891    | 27   | -0.537777 | -1.551505 | 0.022801  | 0.425528  | 1.000      |
| 692 GOBP-RESPONSE.TO.METAL-ION                        | GO-0010038    | 15   | -0.586003 | -1.552706 | 0.022353  | 0.436035  | 1.000      |
| 693 REACTOME-CELLULAR-SENESCENCE                      | R-RNO-2559583 | 6    | -0.743931 | -1.555659 | 0.018494  | 0.440793  | 1.000      |
| 694 REACTOME-CELL-CYCLE-MITOTIC                       | R-RNO-69278   | 5    | -0.777316 | -1.560863 | 0.014865  | 0.435689  | 1.000      |
| 695 GOBP-CYTOKINE-PRODUCTION                          | GO-0001816    | 10   | -0.653944 | -1.564655 | 0.023002  | 0.436099  | 1.000      |
| 696 GOBP-LEUKOCYTE-DIFFERENTIATION                    | GO-0002521    | 15   | -0.601688 | -1.565265 | 0.026775  | 0.453241  | 1.000      |
| 697 GOBP-CELLULAR-RESPONSE.TO.CHEMICAL-STRESS         | GO-0062197    | 7    | -0.705586 | -1.568984 | 0.022930  | 0.457875  | 1.000      |
| 698 REACTOME-RHO-GTPASE-EFFECTORS                     | R-RNO-195258  | 9    | -0.683420 | -1.572556 | 0.018916  | 0.462620  | 1.000      |
| 699 REACTOME-INTRACELLULAR-SIGNALING-BY-SECOND-MES... | R-RNO-9006925 | 15   | -0.597985 | -1.573132 | 0.015012  | 0.482392  | 1.000      |
| 700 REACTOME-SIGNALING-BY-RHO-GTPASES-MIRO-GTPASES... | R-RNO-9716542 | 9    | -0.683420 | -1.573596 | 0.019876  | 0.504761  | 1.000      |
| 701 REACTOME-PTEN-REGULATION                          | R-RNO-6807070 | 5    | -0.795312 | -1.574377 | 0.017287  | 0.528511  | 1.000      |
| 702 GOBP-CIRCADIAN-REGULATION.OF.GENE-EXPRESSION      | GO-0032922    | 5    | -0.810652 | -1.582998 | 0.009615  | 0.511561  | 1.000      |
| 703 GOBP-RESPONSE.TO.CYTOKINE                         | GO-0034097    | 23   | -0.561041 | -1.590455 | 0.012182  | 0.503463  | 1.000      |
| 704 GOBP-RESPONSE.TO.INTERLEUKIN-1                    | GO-0070555    | 5    | -0.788071 | -1.592308 | 0.011080  | 0.527145  | 1.000      |
| 705 GOBP-CELLULAR-RESPONSE.TO.ORGANIC-CYCLIC-COMPOUND | GO-0071407    | 13   | -0.628618 | -1.605673 | 0.017815  | 0.492604  | 0.999      |
| 706 GOBP-CHROMOSOME-ORGANIZATION                      | GO-0051276    | 6    | -0.779348 | -1.616309 | 0.011749  | 0.474459  | 0.998      |
| 707 GOBP-IMMUNE-SYSTEM-DEVELOPMENT                    | GO-0002520    | 17   | -0.602560 | -1.621369 | 0.005855  | 0.484531  | 0.997      |
| 708 REACTOME-INTERLEUKIN-17-SIGNALING                 | R-RNO-448424  | 6    | -0.779880 | -1.624243 | 0.010540  | 0.511357  | 0.997      |
| 709 REACTOME-CELLULAR-RESPONSES.TO.EXTERNAL-STIMULI   | R-RNO-8953897 | 12   | -0.659393 | -1.624315 | 0.003563  | 0.561680  | 0.997      |
| 710 GOBP-REPRODUCTIVE-SYSTEM-DEVELOPMENT              | GO-0061458    | 6    | -0.768679 | -1.630165 | 0.004098  | 0.580990  | 0.995      |
| 711 GOBP-CELLULAR-RESPONSE.TO.OXYGEN-CONTAINING.CO... | GO-1901701    | 29   | -0.556350 | -1.633406 | 0.007503  | 0.630095  | 0.995      |
| 712 GOBP-POSITIVE-REGULATION.OF-TRANSCRIPTION-BY-R... | GO-0045944    | 24   | -0.562724 | -1.634757 | 0.005525  | 0.709635  | 0.995      |
| 713 GOBP-TRANSMEMBRANE-RECEPTOR-PROTEIN-SERINE.THR... | GO-0007178    | 6    | -0.793485 | -1.642650 | 0.009272  | 0.760634  | 0.992      |
| 714 GOBP-RESPONSE.TO.CADMIUM-ION                      | GO-0046686    | 6    | -0.811818 | -1.668194 | 0.005249  | 0.687236  | 0.959      |
| 715 REACTOME-RNA-POLYMERASE-II-TRANSCRIPTION          | R-RNO-73857   | 20   | -0.603682 | -1.670752 | 0.006787  | 0.833580  | 0.954      |
| 716 GOBP-RESPONSE.TO.HEAT                             | GO-0009408    | 7    | -0.770551 | -1.697763 | 0.005141  | 0.786915  | 0.885      |
| 717 GOBP-EPITHELIAL-CELL-PROLIFERATION                | GO-0050673    | 12   | -0.676235 | -1.702127 | 0.003550  | 1.000000  | 0.876      |
| 718 GOBP-RESPONSE.TO-TEMPERATURE-STIMULUS             | GO-0009266    | 9    | -0.835824 | -1.940079 | 0.000000  | 0.059114  | 0.056      |

End of Table

Supplementary Table S19: CB late profile (45 DPL peak) GSEA results.

| Begin of Table S19 |                                                   |               |      |          |          |           |           |            |  |
|--------------------|---------------------------------------------------|---------------|------|----------|----------|-----------|-----------|------------|--|
|                    | NAME                                              | ID            | SIZE | ES       | NES      | NOM.p.val | FDR.q.val | FWER.p.val |  |
| 0                  | GOBP_NERVE_DEVELOPMENT                            | GO:0021675    | 9    | 0.716460 | 2.134525 | 0.000000  | 0.229673  | 0.297      |  |
| 1                  | GOBP_NEUROTROPHIN_TRK_RECEPTOR_SIGNALING_PATHWAY  | GO:0048011    | 6    | 0.756005 | 2.012518 | 0.000000  | 0.294539  | 0.603      |  |
| 2                  | GOBP_NEUROTROPHIN_SIGNALING_PATHWAY               | GO:0038179    | 6    | 0.756005 | 1.964451 | 0.005666  | 0.274723  | 0.720      |  |
| 3                  | GOBP_NEGATIVE_REGULATION_OF_NEURON_APOPTOTIC_P... | GO:0043524    | 8    | 0.644055 | 1.874099 | 0.014085  | 0.364420  | 0.896      |  |
| 4                  | GOBP_MULTICELLULAR_ORGANISMAL_RESPONSE_TO_STRESS  | GO:0033555    | 5    | 0.747005 | 1.776908 | 0.032432  | 0.498949  | 0.973      |  |
| 5                  | GOBP_NUCLEAR_TRANSPORT                            | GO:0051169    | 5    | 0.728041 | 1.751098 | 0.021390  | 0.476310  | 0.986      |  |
| 6                  | GOBP_SKELETAL_MUSCLE_ORGAN_DEVELOPMENT            | GO:0060538    | 5    | 0.732227 | 1.74755  | 0.022059  | 0.416709  | 0.986      |  |
| 7                  | GOBP_REGULATION_OF_NEUROGENESIS                   | GO:0050767    | 14   | 0.468034 | 1.694843 | 0.018462  | 0.478156  | 0.997      |  |
| 8                  | GOBP_POSITIVE_REGULATION_OF_BINDING               | GO:0051099    | 6    | 0.631168 | 1.659829 | 0.028490  | 0.507211  | 0.998      |  |
| 9                  | GOBP_REGULATION_OF_CELL_DEVELOPMENT               | GO:0060284    | 15   | 0.457693 | 1.647894 | 0.038095  | 0.483624  | 0.998      |  |
| 10                 | GOBP_REGULATION_OF_CELL_DIFFERENTIATION           | GO:0045595    | 36   | 0.330436 | 1.616250 | 0.013575  | 0.514549  | 1.000      |  |
| 11                 | GOBP_REGULATION_OF_NERVOUS_SYSTEM_DEVELOPMENT     | GO:0051960    | 15   | 0.417206 | 1.588721 | 0.055738  | 0.540900  | 1.000      |  |
| 12                 | GOBP_REGULATION_OF_PHOSPHOLIPASE_ACTIVITY         | GO:0010517    | 6    | 0.597561 | 1.579981 | 0.057221  | 0.521679  | 1.000      |  |
| 13                 | GOBP_PEPTIDYL_AMINO_ACID_MODIFICATION             | GO:0018193    | 22   | 0.363230 | 1.538866 | 0.047619  | 0.592602  | 1.000      |  |
| 14                 | GOBP_REGULATION_OF_LIPASE_ACTIVITY                | GO:0060191    | 6    | 0.597561 | 1.533080 | 0.086705  | 0.568456  | 1.000      |  |
| 15                 | GOBP_INTRACELLULAR_TRANSPORT                      | GO:0046907    | 11   | 0.452115 | 1.530977 | 0.057927  | 0.538756  | 1.000      |  |
| 16                 | GOBP_REGULATION_OF_NEURON_DIFFERENTIATION         | GO:0045664    | 5    | 0.617818 | 1.514529 | 0.068493  | 0.547635  | 1.000      |  |
| 17                 | GOBP_POSITIVE_REGULATION_OF_CELL_DEVELOPMENT      | GO:0010720    | 12   | 0.432380 | 1.514442 | 0.062706  | 0.517392  | 1.000      |  |
| 18                 | GOBP_NEGATIVE_REGULATION_OF_CELL_DIFFERENTIATION  | GO:0045596    | 13   | 0.411971 | 1.484162 | 0.070513  | 0.565311  | 1.000      |  |
| 19                 | GOBP_NEGATIVE_REGULATION_OF_DEVELOPMENTAL_PROCESS | GO:0051093    | 13   | 0.411971 | 1.481328 | 0.083871  | 0.543793  | 1.000      |  |
| 20                 | GOBP_POSITIVE_REGULATION_OF_NEUROGENESIS          | GO:0050769    | 12   | 0.432380 | 1.480072 | 0.072131  | 0.520629  | 1.000      |  |
| 21                 | GOBP_POSITIVE_REGULATION_OF_NERVOUS_SYSTEM_DEV... | GO:0051962    | 12   | 0.432380 | 1.475271 | 0.084416  | 0.507155  | 1.000      |  |
| 22                 | GOBP_NEURON_APOPTOTIC_PROCESS                     | GO:0051402    | 12   | 0.425131 | 1.462701 | 0.070968  | 0.515005  | 1.000      |  |
| 23                 | GOBP_PERIPHERAL_NERVOUS_SYSTEM_DEVELOPMENT        | GO:0007422    | 9    | 0.457535 | 1.455716 | 0.080357  | 0.509114  | 1.000      |  |
| 24                 | GOBP_REGULATION_OF_PHOSPHOLIPASE_C_ACTIVITY       | GO:1900274    | 5    | 0.590361 | 1.441845 | 0.114362  | 0.520327  | 1.000      |  |
| 25                 | GOBP_REGULATION_OF_MULTICELLULAR_ORGANISMAL_DE... | GO:2000026    | 31   | 0.306068 | 1.431152 | 0.047619  | 0.524655  | 1.000      |  |
| 26                 | GOBP_POSITIVE_REGULATION_OF_LIPASE_ACTIVITY       | GO:0060193    | 5    | 0.590361 | 1.424417 | 0.085873  | 0.520287  | 1.000      |  |
| 27                 | GOBP_RESPONSE_TO_STARVATION                       | GO:0042594    | 5    | 0.575313 | 1.423891 | 0.083102  | 0.502754  | 1.000      |  |
| 28                 | GOBP_CELLULAR_RESPONSE_TO_STARVATION              | GO:0009267    | 5    | 0.575313 | 1.413315 | 0.108992  | 0.508393  | 1.000      |  |
| 29                 | GOBP_REGULATION_OF_GTPASE_ACTIVITY                | GO:0043087    | 5    | 0.575313 | 1.375816 | 0.133880  | 0.577743  | 1.000      |  |
| 30                 | GOBP_FC_EPSILON_RECEPTOR_SIGNALING_PATHWAY        | GO:0038095    | 7    | 0.481482 | 1.369556 | 0.111782  | 0.572921  | 1.000      |  |
| 31                 | GOBP_NEGATIVE_REGULATION_OF_PROTEIN_METABOLIC...  | GO:0051248    | 20   | 0.332383 | 1.354928 | 0.111913  | 0.589906  | 1.000      |  |
| 32                 | GOBP_NEGATIVE_REGULATION_OF_PROTEOLYSIS           | GO:0045861    | 8    | 0.456930 | 1.341875 | 0.133333  | 0.604494  | 1.000      |  |
| 33                 | GOBP_NEGATIVE_REGULATION_OF_NEURON_DEATH          | GO:1901215    | 11   | 0.400801 | 1.335697 | 0.141538  | 0.602383  | 1.000      |  |
| 34                 | GOBP_POSITIVE_REGULATION_OF_GLOIOGENESIS          | GO:0014015    | 5    | 0.546907 | 1.332623 | 0.136816  | 0.592521  | 1.000      |  |
| 35                 | GOBP_POSITIVE_REGULATION_OF_LOCOMOTION            | GO:0040017    | 11   | 0.395448 | 1.332378 | 0.133779  | 0.576815  | 1.000      |  |
| 36                 | GOBP_SMALL_GTPASE_MEDIATED_SIGNAL_TRANSDUCTION    | GO:0007264    | 8    | 0.453414 | 1.332291 | 0.153425  | 0.561364  | 1.000      |  |
| 37                 | REACTOME_FC_EPSILON_RECEPTOR_FCRH_SIGNALING       | R-RNO-2454202 | 7    | 0.481481 | 1.329276 | 0.150000  | 0.553650  | 1.000      |  |
| 38                 | GOBP_REGULATION_OF_GLOIOGENESIS                   | GO:0014013    | 5    | 0.546907 | 1.324237 | 0.135977  | 0.550937  | 1.000      |  |
| 39                 | GOBP_MUSCLE_ORGAN_DEVELOPMENT                     | GO:0007517    | 9    | 0.429393 | 1.323356 | 0.150769  | 0.539286  | 1.000      |  |
| 40                 | GOBP_INTRACELLULAR_PROTEIN_TRANSPORT              | GO:0006886    | 9    | 0.423097 | 1.318148 | 0.132743  | 0.537549  | 1.000      |  |

Continuation of Table S19

|    | NAME                                               | ID            | SIZE | ES       | NES      | NOM.p.val | FDR.q.val | FWER.p.val |
|----|----------------------------------------------------|---------------|------|----------|----------|-----------|-----------|------------|
| 41 | REACTOME.BETA_CATENIN_INDEPENDENT_WNT_SIGNALING    | R-RNO-3858494 | 5    | 0.527452 | 1.309498 | 0.156522  | 0.543938  | 1.000      |
| 42 | GOBP.MYOTUBE_DIFFERENTIATION                       | GO-0014902    | 5    | 0.542169 | 1.304991 | 0.170455  | 0.540888  | 1.000      |
| 43 | GOBP.RHYTHMIC_PROCESS                              | GO-0048511    | 15   | 0.341645 | 1.283914 | 0.138047  | 0.572486  | 1.000      |
| 44 | GOBP.REGULATION_OF_BINDING                         | GO-0051098    | 11   | 0.381002 | 1.278581 | 0.179878  | 0.572397  | 1.000      |
| 45 | REACTOME.SIGNALING_BY_WNT                          | R-RNO-195721  | 7    | 0.440998 | 1.267772 | 0.173410  | 0.583030  | 1.000      |
| 46 | GOBP.MUSCLE_TISSUE_DEVELOPMENT                     | GO-0060537    | 11   | 0.355989 | 1.234762 | 0.205607  | 0.647616  | 1.000      |
| 47 | REACTOME.CELLULAR_SENESCENCE                       | R-RNO-2559583 | 6    | 0.463415 | 1.229137 | 0.202740  | 0.647220  | 1.000      |
| 48 | REACTOME.SIGNALING_BY_NTRKS                        | R-RNO-166520  | 18   | 0.309306 | 1.225833 | 0.179856  | 0.641921  | 1.000      |
| 49 | REACTOME.SENESCENCE_ASSOCIATED_SECRETORY_PHENO...  | R-RNO-2559582 | 6    | 0.463415 | 1.221107 | 0.218289  | 0.639940  | 1.000      |
| 50 | HALLMARK_KRAS_SIGNALING_UP                         | M5953         | 6    | 0.469763 | 1.220152 | 0.217514  | 0.629797  | 1.000      |
| 51 | GOBP.PEPTIDYL_LYSINE_MODIFICATION                  | GO-0018205    | 5    | 0.481928 | 1.215751 | 0.220472  | 0.628005  | 1.000      |
| 52 | REACTOME.CELL_CYCLE_MITOTIC                        | R-RNO-69278   | 5    | 0.493718 | 1.205332 | 0.248603  | 0.641023  | 1.000      |
| 53 | GOBP.REGULATION_OF_PEPTIDYL_TYROSINE_PHOSPHORYL... | GO-0050730    | 9    | 0.383853 | 1.201798 | 0.224377  | 0.638281  | 1.000      |
| 54 | GOBP.NEGATIVE_REGULATION_OF_PEPTIDASE_ACTIVITY     | GO-0010466    | 6    | 0.451545 | 1.200791 | 0.209945  | 0.629241  | 1.000      |
| 55 | GOBP.CIRCADIAN_REGULATION_OF_GENE_EXPRESSION       | GO-0032922    | 5    | 0.486814 | 1.193968 | 0.240113  | 0.633790  | 1.000      |
| 56 | REACTOME.MYD88_INDEPENDENT_TLR4_CASCADE            | R-RNO-166166  | 8    | 0.387500 | 1.184682 | 0.219020  | 0.643827  | 1.000      |
| 57 | GOBP.NEGATIVE_REGULATION_OF_CYSSTEINE_TYPE_ENDO... | GO-2000117    | 5    | 0.489926 | 1.180252 | 0.230769  | 0.642828  | 1.000      |
| 58 | REACTOME.TOLL LIKE RECEPTOR_TLR1_TLR2_CASCADE      | R-RNO-168179  | 8    | 0.387500 | 1.178623 | 0.250765  | 0.635857  | 1.000      |
| 59 | GOBP.DEPHOSPHORYLATION                             | GO-0016311    | 7    | 0.409268 | 1.169015 | 0.278515  | 0.647711  | 1.000      |
| 60 | REACTOME.TOLL LIKE RECEPTOR_CASCADES               | R-RNO-168898  | 8    | 0.387500 | 1.155161 | 0.249275  | 0.670074  | 1.000      |
| 61 | GOBP.RESPONSE_TO_NERVE_GROWTH_FACTOR               | GO-1990089    | 7    | 0.413277 | 1.147483 | 0.285714  | 0.677009  | 1.000      |
| 62 | GOBP.PROTEIN_DEPHOSPHORYLATION                     | GO-0006470    | 7    | 0.409268 | 1.144085 | 0.298851  | 0.674264  | 1.000      |
| 63 | GOBP.NEURON_PROJECTION_GUIDANCE                    | GO-0097485    | 9    | 0.363208 | 1.120672 | 0.303681  | 0.719431  | 1.000      |
| 64 | GOBP.RESPONSE_TO_INTERLEUKIN_1                     | GO-0070555    | 5    | 0.457831 | 1.116054 | 0.293814  | 0.719585  | 1.000      |
| 65 | REACTOME.TOLL LIKE RECEPTOR_9_TLR9_CASCADE         | R-RNO-168138  | 5    | 0.387500 | 1.113771 | 0.280347  | 0.714299  | 1.000      |
| 66 | GOBP.REGULATION_OF_MUSCLE_ADAPTATION               | GO-0043502    | 5    | 0.452378 | 1.104137 | 0.301047  | 0.726482  | 1.000      |
| 67 | GOBP.INOSITOL_LIPID_MEDIATED_SIGNALING             | GO-0048017    | 8    | 0.377988 | 1.103656 | 0.318885  | 0.716931  | 1.000      |
| 68 | GOBP.RAS_PROTEIN_SIGNAL_TRANSDUCTION               | GO-0007265    | 5    | 0.455482 | 1.093220 | 0.321244  | 0.732153  | 1.000      |
| 69 | GOBP.POSITIVE_REGULATION_OF_PEPTIDYL_SERINE_PH...  | GO-0033138    | 8    | 0.359703 | 1.084723 | 0.361979  | 0.743248  | 1.000      |
| 70 | GOBP.POSITIVE_REGULATION_OF_MULTICELLULAR_ORGA...  | GO-0051240    | 32   | 0.240193 | 1.084691 | 0.327465  | 0.732898  | 1.000      |
| 71 | REACTOME.CELL_CYCLE                                | R-RNO-1640170 | 6    | 0.415120 | 1.083348 | 0.352632  | 0.725709  | 1.000      |
| 72 | GOBP.POSITIVE_REGULATION_OF_AXONOGENESIS           | GO-0050772    | 5    | 0.438849 | 1.078785 | 0.334239  | 0.726323  | 1.000      |
| 73 | GOBP.MUSCLE_ADAPTATION                             | GO-0043500    | 5    | 0.452378 | 1.077121 | 0.330275  | 0.720460  | 1.000      |
| 74 | GOBP.REGULATION_OF_PEPTIDYL_SERINE_PHOSPHORYLA...  | GO-0033135    | 8    | 0.359703 | 1.076031 | 0.335329  | 0.713469  | 1.000      |
| 75 | GOBP.NEGATIVE_REGULATION_OF_CELL_DEATH             | GO-0060548    | 22   | 0.268185 | 1.068055 | 0.332090  | 0.722301  | 1.000      |
| 76 | GOBP.DEVELOPMENTAL_GROWTH                          | GO-0048589    | 10   | 0.333508 | 1.045291 | 0.373771  | 0.768877  | 1.000      |
| 77 | GOBP.PROTEIN_MODIFICATION_BY_SMALL_PROTEIN_CON...  | GO-0032446    | 6    | 0.388088 | 1.041826 | 0.388406  | 0.766668  | 1.000      |
| 78 | GOBP.NEURON_DEATH                                  | GO-0070997    | 18   | 0.263215 | 1.032896 | 0.410256  | 0.777486  | 1.000      |
| 79 | REACTOME.SIGNALING_BY_RECEPTOR_TYROSINE_KINASES    | R-RNO-9006934 | 26   | 0.229652 | 1.024655 | 0.429688  | 0.788181  | 1.000      |
| 80 | GOBP.POSITIVE_REGULATION_OF_CELLULAR_COMPONENT...  | GO-0051130    | 24   | 0.238158 | 1.023835 | 0.423611  | 0.780463  | 1.000      |
| 81 | GOBP.CELLULAR_COMPONENT_MORPHOGENESIS              | GO-0032989    | 24   | 0.235420 | 1.022987 | 0.444444  | 0.772778  | 1.000      |
| 82 | GOBP.CELL_MORPHOGENESIS                            | GO-0000902    | 24   | 0.235420 | 1.019011 | 0.422053  | 0.772606  | 1.000      |
| 83 | GOBP.REGULATION_OF_ENDOCYTOSIS                     | GO-0030100    | 6    | 0.389262 | 1.015818 | 0.437888  | 0.770661  | 1.000      |

Continuation of Table S19

| NAME | ID                                                | SIZE | ES       | NES      | NOM.p.val | FDR.q.val | FWER.p.val |
|------|---------------------------------------------------|------|----------|----------|-----------|-----------|------------|
| 84   | GOBP-NEGATIVE-REGULATION-OF-CELL-POPULATION.PR... | 9    | 0.329339 | 1.014069 | 0.428144  | 0.765887  | 1.000      |
| 85   | GOBP-CELL-MORPHOGENESIS-INVOLVED-IN-DIFFERENTI... | 21   | 0.241925 | 1.014042 | 0.455830  | 0.757020  | 1.000      |
| 86   | GOBP-PEPTIDYL-TYROSINE-MODIFICATION               | 10   | 0.309895 | 1.013318 | 0.419753  | 0.749825  | 1.000      |
| 87   | GOBP-CELL-PART-MORPHOGENESIS                      | 24   | 0.235420 | 1.006619 | 0.415094  | 0.756027  | 1.000      |
| 88   | GOBP-TRANSMEMBRANE-RECEPTOR-PROTEIN-SERINE-THR... | 6    | 0.378049 | 1.005526 | 0.389535  | 0.750183  | 1.000      |
| 89   | GOBP-CELL-MORPHOGENESIS-INVOLVED-IN-NEURON-DIF... | 21   | 0.241925 | 0.998708 | 0.448630  | 0.757084  | 1.000      |
| 90   | GOBP-REGULATION-OF-PROTEOLYSIS                    | 12   | 0.288387 | 0.990185 | 0.448276  | 0.768204  | 1.000      |
| 91   | GOBP-REGULATION-OF-INTRACELLULAR-SIGNAL-TRANSD... | 21   | 0.233492 | 0.985595 | 0.487719  | 0.763245  | 1.000      |
| 92   | REACTOME-INTERLEUKIN_17-SIGNALING                 | 6    | 0.378049 | 0.987267 | 0.475138  | 0.758124  | 1.000      |
| 93   | GOBP-REGULATION-OF-PHOSPHATIDYLINOSITOL-3-KINA... | 6    | 0.378035 | 0.986633 | 0.431267  | 0.751468  | 1.000      |
| 94   | GOBP-GROWTH                                       | 14   | 0.262635 | 0.983833 | 0.468227  | 0.749883  | 1.000      |
| 95   | GOBP-NEGATIVE-REGULATION-OF-MULTICELLULAR-ORGA... | 15   | 0.264120 | 0.975911 | 0.450658  | 0.758765  | 1.000      |
| 96   | GOBP-POSITIVE-REGULATION-OF-CELL-POPULATION.PR... | 21   | 0.232286 | 0.975493 | 0.473186  | 0.751821  | 1.000      |
| 97   | GOBP-TRANSMEMBRANE-RECEPTOR-PROTEIN-TYROSINE.K... | 19   | 0.234887 | 0.960266 | 0.531773  | 0.776809  | 1.000      |
| 98   | GOBP-POSITIVE-REGULATION-OF-INTRACELLULAR-SIGN... | 14   | 0.258148 | 0.944790 | 0.535928  | 0.802576  | 1.000      |
| 99   | GOBP-POSITIVE-REGULATION-OF-PHOSPHATIDYLINOSIT... | 5    | 0.378161 | 0.934229 | 0.522310  | 0.817339  | 1.000      |
| 100  | REACTOME-MAPK-TARGETS-NUCLEAR-EVENTS-MEDIATED...  | 5    | 0.373494 | 0.929190 | 0.524638  | 0.820399  | 1.000      |
| 101  | GOBP-ENDOCYTOSIS                                  | 8    | 0.317761 | 0.926144 | 0.546828  | 0.818990  | 1.000      |
| 102  | GOBP-RESPONSE-TO-GROWTH-FACTOR                    | 18   | 0.235347 | 0.924477 | 0.568690  | 0.814326  | 1.000      |
| 103  | GOBP-POSITIVE-REGULATION-OF-EPITHELIAL-CELL.MI... | 5    | 0.375650 | 0.918646 | 0.522078  | 0.819024  | 1.000      |
| 104  | GOBP-MUSCLE-CELL-DEVELOPMENT                      | 5    | 0.372794 | 0.915466 | 0.562857  | 0.818056  | 1.000      |
| 105  | GOBP-CIRCADIAN-RHYTHM                             | 13   | 0.256841 | 0.909546 | 0.560137  | 0.822730  | 1.000      |
| 106  | GOBP-POSITIVE-REGULATION-OF-PEPTIDYL-TYROSINE...  | 8    | 0.305413 | 0.907952 | 0.557103  | 0.818416  | 1.000      |
| 107  | GOBP-CELLULAR-MACROMOLECULE-CATABOLIC-PROCESS     | 6    | 0.340300 | 0.901461 | 0.576819  | 0.824088  | 1.000      |
| 108  | GOBP-OSSIFICATION                                 | 9    | 0.292325 | 0.897862 | 0.587349  | 0.823741  | 1.000      |
| 109  | GOBP-DEVELOPMENTAL-CELL-GROWTH                    | 5    | 0.363172 | 0.893180 | 0.569892  | 0.826537  | 1.000      |
| 110  | REACTOME-ADAPTIVE-IMMUNE-SYSTEM                   | 9    | 0.295496 | 0.889328 | 0.573529  | 0.826876  | 1.000      |
| 111  | GOBP-REGULATION-OF-VESICLE-MEDIATED-TRANSPORT     | 12   | 0.251160 | 0.889098 | 0.593443  | 0.820013  | 1.000      |
| 112  | GOBP-NEGATIVE-REGULATION-OF-CELL-PROJECTION.OR... | 5    | 0.368189 | 0.885217 | 0.598425  | 0.820328  | 1.000      |
| 113  | GOBP-POSITIVE-REGULATION-OF-ORGANELLE-ORGANIZA... | 10   | 0.275196 | 0.883026 | 0.612613  | 0.817529  | 1.000      |
| 114  | GOBP-CELL-POPULATION-PROLIFERATION                | 31   | 0.194700 | 0.882057 | 0.637860  | 0.812175  | 1.000      |
| 115  | GOBP-NEGATIVE-REGULATION-OF-PROTEIN-MODIFICATI... | 10   | 0.272593 | 0.876698 | 0.629179  | 0.815539  | 1.000      |
| 116  | GOBP-GLIOGENESIS                                  | 12   | 0.256193 | 0.874804 | 0.638978  | 0.812294  | 1.000      |
| 117  | GOBP-NEGATIVE-REGULATION-OF-CELL-DEVELOPMENT      | 6    | 0.327420 | 0.872096 | 0.610959  | 0.810770  | 1.000      |
| 118  | REACTOME-INNATE-IMMUNE-SYSTEM                     | 16   | 0.223922 | 0.864512 | 0.638095  | 0.818424  | 1.000      |
| 119  | GOBP-RESPONSE-TO-PEPTIDE                          | 18   | 0.225209 | 0.863760 | 0.621053  | 0.813164  | 1.000      |
| 120  | REACTOME-DEATH-RECEPTOR-SIGNALING                 | 5    | 0.356092 | 0.850111 | 0.635389  | 0.832587  | 1.000      |
| 121  | GOBP-NEGATIVE-REGULATION-OF-NERVOUS-SYSTEM.DEV... | 5    | 0.348451 | 0.847495 | 0.655353  | 0.830251  | 1.000      |
| 122  | GOBP-POSITIVE-REGULATION-OF-CELL-DIFFERENTIATION  | 27   | 0.196802 | 0.839909 | 0.694444  | 0.837437  | 1.000      |
| 123  | GOBP-NEGATIVE-REGULATION-OF-PHOSPHORYLATION       | 7    | 0.301912 | 0.839595 | 0.652709  | 0.831210  | 1.000      |
| 124  | GOBP-REGULATION-OF-CIRCADIAN-RHYTHM               | 7    | 0.304121 | 0.836531 | 0.663044  | 0.830127  | 1.000      |
| 125  | GOBP-POSITIVE-REGULATION-OF-DEVELOPMENTAL-PROCESS | 32   | 0.176184 | 0.832391 | 0.740458  | 0.831071  | 1.000      |
| 126  | GOBP-TAXIS                                        | 14   | 0.231693 | 0.832133 | 0.674267  | 0.825044  | 1.000      |

Continuation of Table S19

| NAME                                                  | ID            | SIZE | ES        | NES       | NOM.p.val | FDR.q.val | FWER.p.val |
|-------------------------------------------------------|---------------|------|-----------|-----------|-----------|-----------|------------|
| 127 GOBP-CELLULAR-GLUCOSE-HOMEOSTASIS                 | GO-0001678    | 5    | 0.346271  | 0.829617  | 0.650273  | 0.823230  | 1.000      |
| 128 GOBP-ENZYME-LINKED-RECEPTOR-PROTEIN-SIGNALING.... | GO-0007167    | 24   | 0.187124  | 0.820410  | 0.715867  | 0.833635  | 1.000      |
| 129 REACTOME-SIGNALING-BY-NTRK2-TRKB                  | R-RNO-9006115 | 6    | 0.304272  | 0.799453  | 0.712329  | 0.863987  | 1.000      |
| 130 GOBP-REGULATION-OF-VASCULAR-ASSOCIATED-SMOOTH...  | GO-1904705    | 5    | 0.323702  | 0.791959  | 0.724868  | 0.870263  | 1.000      |
| 131 GOBP-POSITIVE-REGULATION-OF-PROTEIN-TYROSINE-K... | GO-00061098   | 5    | 0.323331  | 0.784913  | 0.731904  | 0.875942  | 1.000      |
| 132 GOBP-RESPONSE-TO-INSULIN                          | GO-0032868    | 5    | 0.326827  | 0.781643  | 0.735897  | 0.874723  | 1.000      |
| 133 GOBP-REGULATION-OF-PROTEIN-TYROSINE-KINASE-ACT... | GO-0061097    | 5    | 0.323331  | 0.779706  | 0.740053  | 0.871251  | 1.000      |
| 134 GOBP-FC-RECEPTOR-SIGNALING-PATHWAY                | GO-0038093    | 8    | 0.258225  | 0.766793  | 0.807580  | 0.886239  | 1.000      |
| 135 GOBP-REGULATION-OF-AXONOGENESIS                   | GO-0050770    | 7    | 0.267458  | 0.761439  | 0.755043  | 0.888616  | 1.000      |
| 136 GOBP-ESTABLISHMENT-OF-PROTEIN-LOCALIZATION-TO...  | GO-0072594    | 6    | 0.290600  | 0.759529  | 0.744565  | 0.885148  | 1.000      |
| 137 GOBP-IMMUNE-RESPONSE-REGULATING-SIGNALING-PATHWAY | GO-0002764    | 8    | 0.258225  | 0.759285  | 0.735736  | 0.879044  | 1.000      |
| 138 GOBP-NEGATIVE-REGULATION-OF-INTRACELLULAR-SIGN... | GO-1902532    | 7    | 0.264403  | 0.749274  | 0.750000  | 0.887674  | 1.000      |
| 139 GOBP-RESPONSE-TO-CALCIUM-ION                      | GO-0051592    | 6    | 0.279673  | 0.737742  | 0.810959  | 0.899069  | 1.000      |
| 140 GOBP-MYELOID-LEUKOCYTE-DIFFERENTIATION            | GO-0002573    | 11   | 0.218297  | 0.717416  | 0.853035  | 0.922017  | 1.000      |
| 141 REACTOME-EXTRACELLULAR-MATRIX-ORGANIZATION        | R-RNO-1474244 | 5    | 0.279941  | 0.710499  | 0.818182  | 0.925219  | 1.000      |
| 142 REACTOME-TRANSCRIPTIONAL-REGULATION-BY-TP53       | R-RNO-3700989 | 6    | 0.269051  | 0.708610  | 0.835165  | 0.921394  | 1.000      |
| 143 GOBP-REGULATION-OF-RESPONSE-TO-EXTERNAL-STIMULUS  | GO-0032101    | 15   | 0.191644  | 0.699205  | 0.875000  | 0.927876  | 1.000      |
| 144 REACTOME-CIRCADIAN-CLOCK                          | R-HSA-400253  | 5    | 0.273243  | 0.671574  | 0.890710  | 0.954912  | 1.000      |
| 145 GOBP-CELLULAR-COMPONENT-MAINTENANCE               | GO-0043954    | 5    | 0.277108  | 0.653934  | 0.899244  | 0.967523  | 1.000      |
| 146 GOBP-REPRODUCTION                                 | GO-0000003    | 18   | 0.160220  | 0.653657  | 0.908127  | 0.961271  | 1.000      |
| 147 REACTOME-G-ALPHA-Q-SIGNALING-EVENTS               | R-RNO-416476  | 6    | 0.243902  | 0.649381  | 0.924471  | 0.958618  | 1.000      |
| 148 GOBP-MYELOID-LEUKOCYTE-MEDIATED-IMMUNITY          | GO-0002444    | 6    | 0.230647  | 0.628173  | 0.945409  | 0.971514  | 1.000      |
| 149 REACTOME-NEUTROPHIL-DEGRANULATION                 | R-RNO-6798695 | 6    | 0.230647  | 0.621796  | 0.942779  | 0.970507  | 1.000      |
| 150 GOBP-CELL-ACTIVATION-INVOLVED-IN-IMMUNE-RESPONSE  | GO-0002263    | 6    | 0.230647  | 0.608382  | 0.958904  | 0.974498  | 1.000      |
| 151 GOBP-NEGATIVE-REGULATION-OF-RESPONSE-TO-STIMULUS  | GO-0048585    | 16   | 0.154738  | 0.588399  | 0.957929  | 0.980415  | 1.000      |
| 152 GOBP-REGULATION-OF-CYTOSKELETON-ORGANIZATION      | GO-0051493    | 5    | 0.224575  | 0.554040  | 0.984127  | 0.990694  | 1.000      |
| 153 GOBP-DEVELOPMENTAL-MATURATION                     | GO-0021700    | 5    | 0.218154  | 0.551313  | 0.972900  | 0.985373  | 1.000      |
| 154 GOBP-REGULATION-OF-RECEPTOR-MEDIATED-ENDOCYTOSIS  | GO-0048259    | 5    | 0.216867  | 0.538108  | 0.977143  | 0.983573  | 1.000      |
| 155 GOBP-NEGATIVE-REGULATION-OF-PROTEIN-CATABOLIC...  | GO-0042177    | 5    | -0.216810 | -0.478337 | 0.988449  | 0.989492  | 1.000      |
| 156 GOBP-RESPONSE-TO-OXIDATIVE-STRESS                 | GO-0006979    | 8    | -0.193124 | -0.492650 | 0.983824  | 0.987941  | 1.000      |
| 157 GOBP-RESPONSE-TO-REACTIVE-OXYGEN-SPECIES          | GO-0000302    | 8    | -0.193124 | -0.494061 | 0.992296  | 0.989300  | 1.000      |
| 158 GOBP-POSITIVE-REGULATION-OF-MYELOID-LEUKOCYTE...  | GO-0002763    | 6    | -0.221299 | -0.514193 | 0.984102  | 0.984878  | 1.000      |
| 159 GOBP-REGULATION-OF-MYELOID-LEUKOCYTE-DIFFERENT... | GO-0002761    | 8    | -0.203522 | -0.523400 | 0.974852  | 0.983415  | 1.000      |
| 160 GOBP-POSITIVE-REGULATION-OF-MYELOID-CELL-DIFFE... | GO-0045639    | 7    | -0.217987 | -0.524860 | 0.969088  | 0.984618  | 1.000      |
| 161 GOBP-CELLULAR-RESPONSE-TO-ABIOTIC-STIMULUS        | GO-0071214    | 7    | -0.215440 | -0.545773 | 0.964451  | 0.977746  | 1.000      |
| 162 HALLMARK-TNFA-SIGNALING-VIA-NFKB                  | M5890         | 14   | -0.180369 | -0.550461 | 0.970845  | 0.977218  | 1.000      |
| 163 GOBP-RECEPTOR-MEDIATED-ENDOCYTOSIS                | GO-0008698    | 6    | -0.243525 | -0.565002 | 0.959055  | 0.971348  | 1.000      |
| 164 GOBP-G-PROTEIN-COUPLED-GLUTAMATE-RECEPTOR-SIGN... | GO-0007216    | 8    | -0.219274 | -0.569855 | 0.950151  | 0.970416  | 1.000      |
| 165 GOBP-LEUKOCYTE-MEDIATED-IMMUNITY                  | GO-0002443    | 7    | -0.231359 | -0.571788 | 0.957878  | 0.971020  | 1.000      |
| 166 GOBP-MYELOID-CELL-DIFFERENTIATION                 | GO-0030099    | 13   | -0.194897 | -0.573897 | 0.944776  | 0.971565  | 1.000      |
| 167 GOBP-CELLULAR-RESPONSE-TO-CHEMICAL-STRESS         | GO-0062197    | 7    | -0.241171 | -0.593668 | 0.925117  | 0.960420  | 1.000      |
| 168 GOBP-NEGATIVE-REGULATION-OF-SIGNALING             | GO-0023057    | 21   | -0.173317 | -0.596654 | 0.931507  | 0.960159  | 1.000      |
| 169 GOBP-CELLULAR-RESPONSE-TO-REACTIVE-OXYGEN-SPECIES | GO-0034614    | 7    | -0.241171 | -0.601966 | 0.937042  | 0.958073  | 1.000      |



Continuation of Table S19

| NAME | ID                                                | SIZE          | ES | NES       | NOM.p.val | FDR.q.val | FWER.p.val |
|------|---------------------------------------------------|---------------|----|-----------|-----------|-----------|------------|
| 170  | REACTOME_NUCLEAR_EVENTS_KINASE_AND_TRANSCRIPTI... | R-RNO-198725  | 11 | -0.213670 | -0.606468 | 0.928465  | 0.956486   |
| 171  | GOBP_REGULATION_OF_ORGANELLE_ORGANIZATION         | GO-00303043   | 14 | -0.203183 | -0.607879 | 0.924638  | 0.957175   |
| 172  | GOBP_NEGATIVE_REGULATION_OF_NUCLEOBASE_CONTAIN... | GO-0045934    | 13 | -0.203541 | -0.617184 | 0.906021  | 0.951579   |
| 173  | GOBP_RESPONSE_TO_UV                               | GO-0009411    | 5  | -0.280211 | -0.621026 | 0.935430  | 0.950225   |
| 174  | GOBP_CELLULAR_RESPONSE_TO_EXTRACELLULAR_STIMULUS  | GO-0031668    | 8  | -0.238400 | -0.622128 | 0.904687  | 0.951089   |
| 175  | REACTOME_TRAFFICKING_OF_GLR2_CONTAINING_AMPA...   | R-RNO-416993  | 8  | -0.244391 | -0.628898 | 0.917933  | 0.947131   |
| 176  | GOBP_REGULATION_OF_WNT_SIGNALING_PATHWAY          | GO-0030111    | 5  | -0.283753 | -0.631496 | 0.932496  | 0.946580   |
| 177  | GOBP_CELL_CELL_SIGNALING_BY_WNT                   | GO-0198738    | 7  | -0.261444 | -0.642730 | 0.905054  | 0.937927   |
| 178  | GOBP_RESPONSE_TO_CADMIUM_ION                      | GO-0046686    | 6  | -0.276102 | -0.647506 | 0.905132  | 0.935300   |
| 179  | GOBP_GLIAL_CELL_DIFFERENTIATION                   | GO-0010001    | 10 | -0.234361 | -0.650355 | 0.896296  | 0.934345   |
| 180  | GOBP_REGULATION_OF_MYELOID_CELL_DIFFERENTIATION   | GO-0045637    | 9  | -0.237986 | -0.651613 | 0.889222  | 0.934854   |
| 181  | GOBP_POSITIVE_REGULATION_OF_NUCLEOBASE_CONTAIN... | GO-0045935    | 28 | -0.178292 | -0.655201 | 0.884097  | 0.933197   |
| 182  | REACTOME_CLASS_C_3_METABOTROPIC_GLUTAMATE_PHER... | R-RNO-420499  | 7  | -0.270473 | -0.665859 | 0.862442  | 0.924447   |
| 183  | GOBP_INTRACELLULAR_RECEPTOR_SIGNALING_PATHWAY     | GO-0030522    | 5  | -0.311048 | -0.670695 | 0.889984  | 0.921375   |
| 184  | GOBP_POSITIVE_REGULATION_OF_CATION_TRANSMEMBR...  | GO-1904064    | 5  | -0.302928 | -0.672107 | 0.889688  | 0.921559   |
| 185  | GOBP_APOPTOTIC_SIGNALING_PATHWAY                  | GO-0097190    | 15 | -0.218418 | -0.674857 | 0.880597  | 0.920520   |
| 186  | GOBP_MEMBRANE_PROTEIN_PROTEOLYSIS                 | GO-0033619    | 6  | -0.294101 | -0.681947 | 0.870253  | 0.914634   |
| 187  | GOBP_EXOCYTOSIS                                   | GO-0006887    | 11 | -0.236962 | -0.685883 | 0.854197  | 0.912216   |
| 188  | GOBP_MULTIORGANISM_PROCESS                        | GO-0051704    | 16 | -0.212412 | -0.686118 | 0.860465  | 0.913661   |
| 189  | GOBP_EPIDERMIS_DEVELOPMENT                        | GO-0008544    | 5  | -0.312094 | -0.695811 | 0.862237  | 0.904629   |
| 190  | GOBP_NEGATIVE_REGULATION_OF_RESPONSE_TO_EXTERN... | GO-0032142    | 5  | -0.312990 | -0.695979 | 0.857820  | 0.906159   |
| 191  | REACTOME_SIGNALING_BY_INTERLEUKINS                | R-RNO-419147  | 15 | -0.218451 | -0.696064 | 0.833557  | 0.907777   |
| 192  | GOBP_RESPONSE_TO_INORGANIC_SUBSTANCE              | GO-0010035    | 19 | -0.208576 | -0.698735 | 0.841160  | 0.906495   |
| 193  | GOBP_EPITHELIAL_CELL_DIFFERENTIATION              | GO-0030855    | 7  | -0.289977 | -0.700842 | 0.838473  | 0.905845   |
| 194  | REACTOME_INTERLEUKIN_4_AND_INTERLEUKIN_13_SIGN... | R-RNO-6785807 | 8  | -0.271211 | -0.705093 | 0.845921  | 0.902560   |
| 195  | GOBP_POSITIVE_REGULATION_OF_BIOSYNTHETIC_PROCESS  | GO-0009891    | 27 | -0.195950 | -0.705130 | 0.855014  | 0.904228   |
| 196  | GOBP_REGULATION_OF_OSTEOCLAST_DIFFERENTIATION     | GO-0045670    | 5  | -0.318916 | -0.711721 | 0.824121  | 0.897970   |
| 197  | GOBP_RECEPTOR_METABOLIC_PROCESS                   | GO-0043112    | 5  | -0.324880 | -0.711824 | 0.849693  | 0.899572   |
| 198  | GOBP_RECEPTOR_INTERNALIZATION                     | GO-0031623    | 5  | -0.324880 | -0.712408 | 0.854200  | 0.900732   |
| 199  | GOBP_ADENYLATE_CYCLASE_INHIBITING_G_PROTEIN_CO... | GO-0007196    | 5  | -0.323373 | -0.716630 | 0.834356  | 0.897477   |
| 200  | GOBP_REGULATION_OF_ANATOMICAL_STRUCTURE_MORPHO... | GO-0022603    | 17 | -0.218761 | -0.720172 | 0.812325  | 0.894997   |
| 201  | REACTOME_PLATELET_ACTIVATION_SIGNALING_AND_AGG... | R-HSA-76002   | 7  | -0.289228 | -0.721285 | 0.824534  | 0.895440   |
| 202  | GOBP_RESPONSE_TO_ALKALOID                         | GO-0043279    | 5  | -0.326817 | -0.724384 | 0.827974  | 0.893429   |
| 203  | GOBP_FAT_CELL_DIFFERENTIATION                     | GO-0045444    | 9  | -0.267182 | -0.724990 | 0.802711  | 0.894405   |
| 204  | GOBP_NEGATIVE_REGULATION_OF_GENE_EXPRESSION       | GO-0010629    | 12 | -0.249044 | -0.725765 | 0.818689  | 0.895138   |
| 205  | GOBP_PROTEIN_LOCALIZATION_TO_ORGANELLE            | GO-0033365    | 9  | -0.268830 | -0.727100 | 0.813846  | 0.895210   |
| 206  | GOBP_CELLULAR_RESPONSE_TO_CADMIUM_ION             | GO-0071276    | 5  | -0.334615 | -0.729147 | 0.843849  | 0.894329   |
| 207  | GOBP_ENDOMEMBRANE_SYSTEM_ORGANIZATION             | GO-0010256    | 6  | -0.312383 | -0.730533 | 0.797468  | 0.894425   |
| 208  | REACTOME_TRANSCRIPTIONAL_REGULATION_OF_WHITE_A... | R-RNO-381340  | 6  | -0.315745 | -0.730972 | 0.819149  | 0.895643   |
| 209  | GOBP_IMMUNE_SYSTEM_DEVELOPMENT                    | GO-0002520    | 17 | -0.228782 | -0.749271 | 0.771709  | 0.874415   |
| 210  | GOBP_POSITIVE_REGULATION_OF_CELL_PROJECTION_OR... | GO-0031346    | 10 | -0.267422 | -0.750112 | 0.773529  | 0.875089   |
| 211  | GOBP_CELL_CYCLE_PROCESS                           | GO-0022402    | 11 | -0.262715 | -0.751268 | 0.796160  | 0.875304   |
| 212  | GOBP_RESPONSE_TO_CARBOHYDRATE                     | GO-0009743    | 5  | -0.349136 | -0.759058 | 0.775244  | 0.866819   |

Continuation of Table S19

| NAME | ID                                                            | SIZE          | ES | NES       | NOM.p.val | FDR.q.val | FWER.p.val |
|------|---------------------------------------------------------------|---------------|----|-----------|-----------|-----------|------------|
| 213  | REACTOME_NGF_STIMULATED_TRANSCRIPTION                         | R-RNO-9031628 | 9  | -0.277320 | -0.759388 | 0.797317  | 0.868114   |
| 214  | GOBP_RESPONSE_TO_MONOSACCHARIDE                               | GO-0034284    | 5  | -0.349136 | -0.763212 | 0.794992  | 0.864620   |
| 215  | GOBP_NEGATIVE_REGULATION_OF_TRANSFERASE_ACTIVITY              | GO-0051348    | 5  | -0.352325 | -0.764850 | 0.801262  | 0.864059   |
| 216  | GOBP_POSITIVE_REGULATION_OF_GENE_EXPRESSION                   | GO-0010628    | 16 | -0.240542 | -0.766466 | 0.739766  | 0.863703   |
| 217  | GOBP_REGULATION_OF_HEMOPOIESIS                                | GO-1903706    | 10 | -0.281720 | -0.766568 | 0.777280  | 0.865292   |
| 218  | GOBP_NEGATIVE_REGULATION_OF_KINASE_ACTIVITY                   | GO-0033673    | 5  | -0.352325 | -0.770150 | 0.778365  | 0.862024   |
| 219  | GOBP_RESPONSE_TO_METAL_ION                                    | GO-0010038    | 15 | -0.245883 | -0.770387 | 0.737752  | 0.863382   |
| 220  | HALLMARK_HYPOXIA                                              | M5891         | 5  | -0.350418 | -0.772066 | 0.802817  | 0.862738   |
| 221  | GOBP_DNA_METABOLIC_PROCESS                                    | GO-0006259    | 6  | -0.329523 | -0.772090 | 0.752280  | 0.864452   |
| 222  | GOBP_REGULATION_OF_MUSCLE_CELL_DIFFERENTIATION                | GO-0051147    | 6  | -0.334677 | -0.774887 | 0.754977  | 0.862413   |
| 223  | GOBP_OSTEOCLAST_DIFFERENTIATION                               | GO-0030316    | 6  | -0.329268 | -0.780695 | 0.770291  | 0.855920   |
| 224  | GOBP_SYNAPTIC_TRANSMISSION_GLUTAMATERGIC                      | GO-0035249    | 13 | -0.262932 | -0.784731 | 0.756637  | 0.851929   |
| 225  | GOBP_REGULATION_OF_PROTEIN_STABILITY                          | GO-0031647    | 5  | -0.360329 | -0.785335 | 0.764706  | 0.852799   |
| 226  | GOBP_REGULATION_OF_GROWTH                                     | GO-0040008    | 13 | -0.259519 | -0.785883 | 0.742358  | 0.853817   |
| 227  | GOBP_REGULATION_OF_DEFENSE_RESPONSE                           | GO-0031347    | 7  | -0.316721 | -0.785921 | 0.735669  | 0.855502   |
| 228  | GOBP_NEGATIVE_REGULATION_OF_PHOSPHORUS_METABOLISM             | GO-0010563    | 9  | -0.299500 | -0.788221 | 0.724458  | 0.854087   |
| 229  | GOBP_POSITIVE_REGULATION_OF_TRANSCRIPTION_BY_RNA              | GO-0045944    | 24 | -0.224299 | -0.788419 | 0.737748  | 0.855545   |
| 230  | GOBP_REGULATION_OF_INFLAMMATORY_RESPONSE                      | GO-0050727    | 7  | -0.316721 | -0.790661 | 0.714286  | 0.854050   |
| 231  | GOBP_AXON_DEVELOPMENT                                         | GO-0061564    | 18 | -0.239499 | -0.795630 | 0.737796  | 0.848623   |
| 232  | GOBP_LIPID_EXPORT_FROM_CELL                                   | GO-0140353    | 5  | -0.361199 | -0.796504 | 0.770000  | 0.849207   |
| 233  | GOBP_POSITIVE_REGULATION_OF_NEURON_PROJECTION                 | GO-0010976    | 5  | -0.362405 | -0.807342 | 0.717156  | 0.835262   |
| 234  | GOBP_IMMUNE_EFFECTOR_PROCESS                                  | GO-0002252    | 10 | -0.290836 | -0.810351 | 0.723781  | 0.832654   |
| 235  | REACTOME_CELLULAR_RESPONSES_TO_EXTERNAL_STIMULI               | R-RNO-8953897 | 12 | -0.272210 | -0.815441 | 0.705185  | 0.826919   |
| 236  | GOBP_NEGATIVE_REGULATION_OF_TRANSCRIPTION_BY_RNA              | GO-0000122    | 10 | -0.294302 | -0.819400 | 0.695586  | 0.822517   |
| 237  | GOBP_NEGATIVE_REGULATION_OF_ION_TRANSPORT                     | GO-0043271    | 11 | -0.284096 | -0.819880 | 0.706408  | 0.823522   |
| 238  | GOBP_POSITIVE_REGULATION_OF_HYDROLASE_ACTIVITY                | GO-0051345    | 16 | -0.257597 | -0.820083 | 0.686630  | 0.824902   |
| 239  | GOBP_REGULATION_OF_HYDROLASE_ACTIVITY                         | GO-0051336    | 22 | -0.231034 | -0.822310 | 0.690608  | 0.823318   |
| 240  | GOBP_REGULATION_OF_LEUKOCYTE_DIFFERENTIATION                  | GO-1902105    | 9  | -0.312046 | -0.827982 | 0.688550  | 0.816727   |
| 241  | REACTOME_G_ALPHA_Z_SIGNALLING_EVENTS                          | R-RNO-418597  | 5  | -0.377357 | -0.828000 | 0.725240  | 0.815406   |
| 242  | GOBP_MUSCLE_CELL_PROLIFERATION                                | GO-0033002    | 8  | -0.319296 | -0.832926 | 0.677130  | 0.812693   |
| 243  | GOBP_MUSCLE_CONTRACTION                                       | GO-0006936    | 5  | -0.377676 | -0.833988 | 0.678333  | 0.812861   |
| 244  | GOBP_REGULATION_OF_NEURONAL_SYNAPTIC_PLASTICITY               | GO-0048168    | 7  | -0.338107 | -0.834045 | 0.682109  | 0.814505   |
| 245  | GOBP_REGULATION_OF_SYNAPTIC_TRANSMISSION_GLUTAMATERGIC        | GO-0051966    | 12 | -0.287141 | -0.836542 | 0.682558  | 0.812395   |
| 246  | REACTOME_INTEGRATION_OF_ENERGY_METABOLISM                     | R-RNO-163685  | 5  | -0.382286 | -0.844165 | 0.682770  | 0.802633   |
| 247  | GOBP_ERBB_SIGNALING_PATHWAY                                   | GO-0038127    | 5  | -0.387135 | -0.845756 | 0.683465  | 0.801862   |
| 248  | REACTOME_PTEN_REGULATION                                      | R-RNO-6807070 | 5  | -0.392361 | -0.847346 | 0.688119  | 0.800929   |
| 249  | GOBP_REGULATION_OF_PEPTIDE_TRANSPORT                          | GO-0090087    | 10 | -0.306555 | -0.848186 | 0.655275  | 0.801412   |
| 250  | GOBP_REPRODUCTIVE_SYSTEM_DEVELOPMENT                          | GO-0061458    | 6  | -0.366397 | -0.849486 | 0.663974  | 0.801059   |
| 251  | REACTOME_HEMOSTASIS                                           | R-RNO-109582  | 14 | -0.270109 | -0.853170 | 0.638849  | 0.796822   |
| 252  | GOBP_POSITIVE_REGULATION_OF_CELLULAR_PROTEIN_LIPID_METABOLISM | GO-1903829    | 7  | -0.344320 | -0.853286 | 0.663522  | 0.798319   |
| 253  | GOBP_LEUKOCYTE_DIFFERENTIATION                                | GO-0002521    | 15 | -0.269955 | -0.858602 | 0.660511  | 0.791633   |
| 254  | HALLMARK_UV_RESPONSE_UP                                       | M5941         | 5  | -0.386158 | -0.866742 | 0.644817  | 0.780346   |
| 255  | REACTOME_NERVOUS_SYSTEM_DEVELOPMENT                           | R-RNO-9675108 | 15 | -0.276845 | -0.868774 | 0.649783  | 0.778747   |

Continuation of Table S19

| NAME                                                  | ID            | SIZE | ES        | NES       | NOM.p.val | FDR.q.val | FWER.p.val |
|-------------------------------------------------------|---------------|------|-----------|-----------|-----------|-----------|------------|
| 256 GOBP-AMINO-ACID-TRANSPORT                         | GO-0006865    | 6    | -0.377787 | -0.869132 | 0.643518  | 0.779782  | 1.000      |
| 257 GOBP-GENERATION-OF-PRECURSOR-METABOLITES-AND-E... | GO-0006091    | 5    | -0.391059 | -0.869932 | 0.660626  | 0.780172  | 1.000      |
| 258 HALLMARK-EPITHELIAL-MESENCHYMAL-TRANSITION        | M5930         | 5    | -0.399774 | -0.872622 | 0.641694  | 0.777565  | 1.000      |
| 259 GOBP-ACIDIC-AMINO-ACID-TRANSPORT                  | GO-0015800    | 5    | -0.400030 | -0.874559 | 0.640063  | 0.776048  | 1.000      |
| 260 GOBP-FOREBRAIN-DEVELOPMENT                        | GO-0030900    | 9    | -0.327152 | -0.876378 | 0.620214  | 0.774754  | 1.000      |
| 261 GOBP-MONOCARBOXYLIC-ACID-TRANSPORT                | GO-0015718    | 5    | -0.400030 | -0.877846 | 0.647152  | 0.773952  | 1.000      |
| 262 GOBP-NEURON-DIFFERENTIATION                       | GO-0030182    | 36   | -0.230265 | -0.878739 | 0.625806  | 0.774156  | 1.000      |
| 263 REACTOME-CYTOKINE-SIGNALING-IN-IMMUNE-SYSTEM      | R-RNO-1280215 | 21   | -0.253180 | -0.880151 | 0.616848  | 0.773503  | 1.000      |
| 264 GOBP-NEGATIVE-REGULATION-OF-APOPTOTIC-SIGNALIN... | GO-2001234    | 7    | -0.358084 | -0.883371 | 0.612598  | 0.769735  | 1.000      |
| 265 GOBP-CELL-GROWTH                                  | GO-0016049    | 10   | -0.320079 | -0.884379 | 0.620061  | 0.769689  | 1.000      |
| 266 GOBP-SECOND-MESSENGER-MEDIATED-SIGNALING          | GO-0019932    | 16   | -0.275405 | -0.884474 | 0.602837  | 0.771188  | 1.000      |
| 267 GOBP-POLYSACCHARIDE-METABOLIC-PROCESS             | GO-0005976    | 5    | -0.404792 | -0.884751 | 0.626959  | 0.772424  | 1.000      |
| 268 GOBP-RESPONSE-TO-RADIATION                        | GO-0009314    | 13   | -0.296204 | -0.886404 | 0.608069  | 0.771471  | 1.000      |
| 269 HALLMARK-ALLOGRAFT-REJECTION                      | M5950         | 7    | -0.350936 | -0.889334 | 0.594679  | 0.768374  | 1.000      |
| 270 GOBP-NEGATIVE-REGULATION-OF-TRANSMEMBRANE-TRAN... | GO-0034763    | 6    | -0.384651 | -0.889589 | 0.623211  | 0.769641  | 1.000      |
| 271 GOBP-DICARBOXYLIC-ACID-TRANSPORT                  | GO-0006835    | 5    | -0.400030 | -0.889811 | 0.617323  | 0.770939  | 1.000      |
| 272 GOBP-REGULATION-OF-ANION-TRANSPORT                | GO-0044070    | 20   | -0.267697 | -0.891794 | 0.593620  | 0.769456  | 1.000      |
| 273 GOBP-MYELOID-LEUKOCYTE-ACTIVATION                 | GO-0002274    | 8    | -0.346707 | -0.892671 | 0.609984  | 0.769696  | 1.000      |
| 274 GOBP-MUSCLE-CELL-DIFFERENTIATION                  | GO-0042692    | 10   | -0.322350 | -0.894323 | 0.602446  | 0.768631  | 1.000      |
| 275 GOBP-CARBOXYLIC-ACID-TRANSPORT                    | GO-0046942    | 6    | -0.377787 | -0.894904 | 0.599686  | 0.769262  | 1.000      |
| 276 GOBP-ORGANIC-ANION-TRANSPORT                      | GO-0015711    | 6    | -0.377787 | -0.894918 | 0.624801  | 0.770978  | 1.000      |
| 277 GOBP-REGULATION-OF-HORMONE-LEVELS                 | GO-0010817    | 12   | -0.304395 | -0.898904 | 0.603107  | 0.764228  | 1.000      |
| 278 GOBP-REGULATION-OF-DEVELOPMENTAL-GROWTH           | GO-0048638    | 9    | -0.333877 | -0.900555 | 0.600299  | 0.764750  | 1.000      |
| 279 GOBP-POSITIVE-REGULATION-OF-DEVELOPMENTAL-GROWTH  | GO-0048639    | 8    | -0.348332 | -0.902195 | 0.600000  | 0.763601  | 1.000      |
| 280 GOBP-CELLULAR-AMIDE-METABOLIC-PROCESS             | GO-0043603    | 13   | -0.298001 | -0.902775 | 0.567208  | 0.764326  | 1.000      |
| 281 GOBP-REGULATION-OF-NEURON-PROJECTION-DEVELOPMENT  | GO-0010975    | 16   | -0.286580 | -0.906522 | 0.556369  | 0.759731  | 1.000      |
| 282 GOBP-LOCOMOTION                                   | GO-0040011    | 31   | -0.245498 | -0.908095 | 0.574324  | 0.758782  | 1.000      |
| 283 GOBP-RESPONSE-TO-WOUNDING                         | GO-0009611    | 15   | -0.290837 | -0.908517 | 0.570213  | 0.759803  | 1.000      |
| 284 REACTOME-GPCR-LIGAND-BINDING                      | R-RNO-500792  | 8    | -0.351378 | -0.911322 | 0.585404  | 0.756749  | 1.000      |
| 285 GOBP-POSITIVE-REGULATION-OF-PEPTIDASE-ACTIVITY    | GO-0010952    | 7    | -0.370545 | -0.911348 | 0.598425  | 0.758431  | 1.000      |
| 286 GOBP-NEGATIVE-REGULATION-OF-BIOSYNTHETIC-PROCESS  | GO-0009890    | 13   | -0.302366 | -0.913161 | 0.585477  | 0.757014  | 1.000      |
| 287 GOBP-ORGANONITROGEN-COMPOUND-CATABOLIC-PROCESS    | GO-1901565    | 9    | -0.334709 | -0.913310 | 0.569925  | 0.758465  | 1.000      |
| 288 GOBP-ORGANIC-HYDROXY-COMPOUND-METABOLIC-PROCESS   | GO-1901615    | 7    | -0.371510 | -0.913924 | 0.571865  | 0.759191  | 1.000      |
| 289 GOBP-CELLULAR-RESPONSE-TO-PEPTIDE                 | GO-1901653    | 13   | -0.297408 | -0.916727 | 0.549708  | 0.756209  | 1.000      |
| 290 GOBP-NEUROGENESIS                                 | GO-0022008    | 40   | -0.236953 | -0.916868 | 0.568063  | 0.757728  | 1.000      |
| 291 GOBP-POSITIVE-REGULATION-OF-NEURON-DEATH          | GO-1901216    | 5    | -0.425528 | -0.919531 | 0.574713  | 0.754904  | 1.000      |
| 292 GOBP-DENDRITE-MORPHOGENESIS                       | GO-0048813    | 6    | -0.389871 | -0.922603 | 0.579200  | 0.751296  | 1.000      |
| 293 GOBP-CELL-PROJECTION-ORGANIZATION                 | GO-0030030    | 34   | -0.245138 | -0.927658 | 0.576000  | 0.744303  | 1.000      |
| 294 GOBP-PROTEOLYSIS                                  | GO-0006508    | 17   | -0.286877 | -0.928002 | 0.555862  | 0.745388  | 1.000      |
| 295 GOBP-NEGATIVE-REGULATION-OF-CATALYTIC-ACTIVITY    | GO-0043086    | 17   | -0.324458 | -0.928426 | 0.545455  | 0.746474  | 1.000      |
| 296 GOBP-REGULATION-OF-PEPTIDASE-ACTIVITY             | GO-0052547    | 10   | -0.332497 | -0.930334 | 0.564829  | 0.744843  | 1.000      |
| 297 GOBP-POSITIVE-REGULATION-OF-CYSTEINE-TYPE-ENDO... | GO-2001056    | 7    | -0.370545 | -0.930947 | 0.546154  | 0.745555  | 1.000      |
| 298 GOBP-CELLULAR-RESPONSE-TO-INORGANIC-SUBSTANCE     | GO-0071241    | 11   | -0.315615 | -0.932828 | 0.526786  | 0.744035  | 1.000      |

Continuation of Table S19

| NAME | ID                                                 | SIZE | ES        | NES       | NOM.p.val | FDR.q.val | FWER.p.val |
|------|----------------------------------------------------|------|-----------|-----------|-----------|-----------|------------|
| 299  | GOBP-SMOOTH_MUSCLE_CELL_PROLIFERATION              | 6    | -0.398447 | -0.934553 | 0.576299  | 0.742700  | 1.000      |
| 300  | GOBP-STRIATED_MUSCLE_CELL_DIFFERENTIATION          | 9    | -0.341317 | -0.937127 | 0.564897  | 0.739773  | 1.000      |
| 301  | GOBP-NEGATIVE_REGULATION_OF_CELLULAR_COMPONENT...  | 11   | -0.325939 | -0.938715 | 0.547865  | 0.738658  | 1.000      |
| 302  | GOBP-ACTIVATION_OF_IMMUNE_RESPONSE                 | 5    | -0.428702 | -0.941001 | 0.565284  | 0.736407  | 1.000      |
| 303  | GOBP-PROTEIN_CATABOLIC_PROCESS                     | 8    | -0.364916 | -0.941266 | 0.526946  | 0.737698  | 1.000      |
| 304  | GOBP-RESPONSE_TO_LIGHT_STIMULUS                    | 11   | -0.331621 | -0.942911 | 0.542522  | 0.736741  | 1.000      |
| 305  | GOBP-RESPONSE_TO_EXTRACELLULAR_STIMULUS            | 13   | -0.319965 | -0.943742 | 0.546742  | 0.736956  | 1.000      |
| 306  | GOBP-ADENYLATE_CYCLASE_INHIBITING_G_PROTEIN_CO...  | 9    | -0.339965 | -0.945407 | 0.537178  | 0.735814  | 1.000      |
| 307  | GOBP-MUSCLE_SYSTEM_PROCESS                         | 9    | -0.345063 | -0.946457 | 0.531531  | 0.735615  | 1.000      |
| 308  | GOBP-POSITIVE_REGULATION_OF_PROTEIN_MODIFICATI...  | 23   | -0.268879 | -0.946773 | 0.540136  | 0.736772  | 1.000      |
| 309  | GOBP-AGING                                         | 13   | -0.309497 | -0.948457 | 0.546529  | 0.735278  | 1.000      |
| 310  | GOBP-POSITIVE_REGULATION_OF_HEMOPOIESIS            | 7    | -0.384439 | -0.949407 | 0.543413  | 0.735218  | 1.000      |
| 311  | GOBP-WOUND_HEALING                                 | 13   | -0.314736 | -0.950013 | 0.532394  | 0.735951  | 1.000      |
| 312  | GOBP-REGULATION_OF_PROTEIN_MODIFICATION_PROCESS    | 29   | -0.255617 | -0.950032 | 0.535763  | 0.737736  | 1.000      |
| 313  | GOBP-INTRINSIC_APOPTOTIC_SIGNALING_PATHWAY         | 5    | -0.428605 | -0.950756 | 0.541735  | 0.738263  | 1.000      |
| 314  | GOBP-POSITIVE_REGULATION_OF_PROTEIN_PHOSPHORYL...  | 23   | -0.354468 | -0.951544 | 0.537271  | 0.738719  | 1.000      |
| 315  | GOBP-REGULATION_OF_CYSSTEINE_TYPE_ENDOPEPTIDASE... | 9    | -0.354468 | -0.952869 | 0.531758  | 0.738182  | 1.000      |
| 316  | GOBP-REGULATION_OF_HORMONE_SECRETION               | 8    | -0.369613 | -0.954904 | 0.510355  | 0.736154  | 1.000      |
| 317  | GOBP-ANION_TRANSMEMBRANE_TRANSPORT                 | 7    | -0.388139 | -0.959733 | 0.529595  | 0.729021  | 1.000      |
| 318  | GOBP-CELLULAR_RESPONSE_TO_EXTERNAL_STIMULUS        | 10   | -0.345361 | -0.960914 | 0.517291  | 0.728628  | 1.000      |
| 319  | REACTOME_ESR-MEDIATED_SIGNALING                    | 8    | -0.373438 | -0.962693 | 0.503771  | 0.727455  | 1.000      |
| 320  | GOBP-RESPONSE_TO_MECHANICAL_STIMULUS               | 6    | -0.412773 | -0.962693 | 0.512618  | 0.728910  | 1.000      |
| 321  | GOBP-POSITIVE_REGULATION_OF_PHOSPHORUS_METABOL...  | 24   | -0.278428 | -0.964034 | 0.533145  | 0.728296  | 1.000      |
| 322  | REACTOME_SIGNALING_BY_NUCLEAR_RECEPTORS            | 8    | -0.373438 | -0.964499 | 0.504532  | 0.729301  | 1.000      |
| 323  | GOBP-CELLULAR_MACROMOLECULE_LOCALIZATION           | 21   | -0.278806 | -0.968014 | 0.476124  | 0.724269  | 1.000      |
| 324  | GOBP-APOPTOTIC_PROCESS                             | 35   | -0.257820 | -0.968184 | 0.516689  | 0.725827  | 1.000      |
| 325  | GOBP-REGULATION_OF_ANATOMICAL_STRUCTURE_SIZE       | 10   | -0.345788 | -0.968624 | 0.485755  | 0.726905  | 1.000      |
| 326  | GOBP-NEURON_DEVELOPMENT                            | 33   | -0.253922 | -0.970567 | 0.506089  | 0.725102  | 1.000      |
| 327  | GOBP-VESICLE-MEDIATED_TRANSPORT_IN_SYNAPSE         | 7    | -0.398980 | -0.972332 | 0.503077  | 0.723649  | 1.000      |
| 328  | GOBP-CARBOHYDRATE_METABOLIC_PROCESS                | 9    | -0.359253 | -0.973079 | 0.506647  | 0.724113  | 1.000      |
| 329  | GOBP-RESPONSE_TO_PEPTIDE_HORMONE                   | 13   | -0.320752 | -0.973571 | 0.486956  | 0.725045  | 1.000      |
| 330  | GOBP-REGULATION_OF_NERVOUS_SYSTEM_PROCESS          | 8    | -0.373448 | -0.974197 | 0.525926  | 0.725663  | 1.000      |
| 331  | GOBP-REGULATION_OF_CELL_SIZE                       | 5    | -0.446919 | -0.976029 | 0.512945  | 0.724062  | 1.000      |
| 332  | HALMARK_APOPTOSIS                                  | 6    | -0.426829 | -0.979121 | 0.497653  | 0.719819  | 1.000      |
| 333  | GOBP-REGULATION_OF_CELL_CYCLE_PROCESS              | 5    | -0.449546 | -0.980811 | 0.487220  | 0.718478  | 1.000      |
| 334  | GOBP-CELLULAR_CARBOHYDRATE_METABOLIC_PROCESS       | 5    | -0.451188 | -0.981542 | 0.484520  | 0.719017  | 1.000      |
| 335  | GOBP-CELLULAR_RESPONSE_TO_OXYGEN-CONTAINING_CO...  | 29   | -0.265757 | -0.982574 | 0.485830  | 0.718942  | 1.000      |
| 336  | REACTOME_RNA_POLYMERASE_II_TRANSCRIPTION           | 20   | -0.290317 | -0.982988 | 0.495105  | 0.720062  | 1.000      |
| 337  | GOBP-POSITIVE_REGULATION_OF_TRANSMEMBRANE_TRAN...  | 7    | -0.393066 | -0.984528 | 0.493865  | 0.718955  | 1.000      |
| 338  | GOBP-POSITIVE_REGULATION_OF_TRANSPORT              | 26   | -0.276812 | -0.985001 | 0.497997  | 0.720000  | 1.000      |
| 339  | GOBP-NEGATIVE_REGULATION_OF_TRANSPORT              | 13   | -0.331129 | -0.986447 | 0.475714  | 0.718978  | 1.000      |
| 340  | GOBP-POSITIVE_REGULATION_OF_GROWTH                 | 9    | -0.367439 | -0.986500 | 0.483434  | 0.720763  | 1.000      |
| 341  | GOBP-PROTEIN_MODIFICATION_BY_SMALL_PROTEIN_CON...  | 7    | -0.401263 | -0.986768 | 0.481833  | 0.722124  | 1.000      |

Continuation of Table S19

| NAME                                                   | ID            | SIZE | ES        | NES       | NOM.p.val | FDR.q.val | FWER.p.val |
|--------------------------------------------------------|---------------|------|-----------|-----------|-----------|-----------|------------|
| 342 REACTOME-SIGNALING-BY-RHO-GTPASES-MIRO-GTPASES...  | R-RNO-9716542 | 9    | -0.365638 | -0.988068 | 0.488954  | 0.721460  | 1.000      |
| 343 GOBP-NEGATIVE-REGULATION-OF-HYDROLASE-ACTIVITY     | GO-0051346    | 11   | -0.342233 | -0.988672 | 0.466872  | 0.722172  | 1.000      |
| 344 GOBP-REGULATION-OF-PROTEIN-CATABOLIC-PROCESS       | GO-0042176    | 7    | -0.400422 | -0.989379 | 0.490712  | 0.722715  | 1.000      |
| 345 GOBP-POSITIVE-REGULATION-OF-RESPONSE-TO-EXTERN...  | GO-0032103    | 9    | -0.367555 | -0.989817 | 0.483871  | 0.723755  | 1.000      |
| 346 GOBP-ESTABLISHMENT-OF-PROTEIN-LOCALIZATION         | GO-0045184    | 18   | -0.299860 | -0.991287 | 0.473118  | 0.722888  | 1.000      |
| 347 REACTOME-RHO-GTPASE-EFFECTORS                      | R-RNO-195258  | 9    | -0.365638 | -0.994973 | 0.473354  | 0.717316  | 1.000      |
| 348 GOBP-RESPONSE-TO-NITROGEN-COMPOUND                 | GO-1901698    | 34   | -0.266885 | -0.996718 | 0.472703  | 0.715862  | 1.000      |
| 349 GOBP-REGULATION-OF-POSTSYNAPSE-ORGANIZATION        | GO-0099175    | 6    | -0.425630 | -0.997498 | 0.487692  | 0.716241  | 1.000      |
| 350 GOBP-POSITIVE-REGULATION-OF-PRL-MIRNA-TRANSCRIP... | GO-1902895    | 7    | -0.409414 | -0.998037 | 0.485732  | 0.717158  | 1.000      |
| 351 GOBP-MULTIMULTICELLULAR-ORGANISM-PROCESS           | GO-0044706    | 8    | -0.381563 | -0.999175 | 0.482707  | 0.716811  | 1.000      |
| 352 GOBP-DENDRITE-DEVELOPMENT                          | GO-0016358    | 9    | -0.378092 | -1.001311 | 0.478807  | 0.714550  | 1.000      |
| 353 GOBP-REGULATION-OF-IMMUNE-RESPONSE                 | GO-0050776    | 12   | -0.342849 | -1.005521 | 0.462304  | 0.708107  | 1.000      |
| 354 GOBP-MUSCLE-STRUCTURE-DEVELOPMENT                  | GO-0061061    | 16   | -0.318472 | -1.005947 | 0.454810  | 0.709117  | 1.000      |
| 355 GOBP-REGULATION-OF-CELL-DEATH                      | GO-0010941    | 34   | -0.267575 | -1.009335 | 0.450875  | 0.704441  | 1.000      |
| 356 GOBP-RESPONSE-TO-ENDOGENOUS-STIMULUS               | GO-0009719    | 34   | -0.263912 | -1.010844 | 0.442257  | 0.703465  | 1.000      |
| 357 GOBP-DEVELOPMENTAL-PROCESS-INVOLVED-IN-REPRODU...  | GO-0003006    | 11   | -0.354516 | -1.015562 | 0.431884  | 0.695824  | 1.000      |
| 358 GOBP-REGULATION-OF-RESPONSE-TO-STRESS              | GO-0080134    | 19   | -0.305656 | -1.016273 | 0.432815  | 0.696386  | 1.000      |
| 359 GOBP-MALE-GAMETE-GENERATION                        | GO-0048232    | 5    | -0.457950 | -1.016966 | 0.431008  | 0.697009  | 1.000      |
| 360 GOBP-CYTOKINE-PRODUCTION                           | GO-0001816    | 10   | -0.366651 | -1.017102 | 0.440184  | 0.698654  | 1.000      |
| 361 GOBP-ORGANOPHOSPHATE-METABOLIC-PROCESS             | GO-0019637    | 7    | -0.410218 | -1.019518 | 0.443932  | 0.695785  | 1.000      |
| 362 GOBP-REGULATION-OF-MUSCLE-SYSTEM-PROCESS           | GO-0090257    | 8    | -0.390017 | -1.021426 | 0.436252  | 0.693852  | 1.000      |
| 363 GOBP-PRL-MIRNA-TRANSCRIPTION-BY-RNA-POLYMERASE.II  | GO-0061614    | 7    | -0.409414 | -1.023804 | 0.435858  | 0.691031  | 1.000      |
| 364 GOBP-MACROMOLECULE-CATABOLIC-PROCESS               | GO-0009057    | 12   | -0.345243 | -1.024631 | 0.421439  | 0.691285  | 1.000      |
| 365 GOBP-POSITIVE-REGULATION-OF-SMOOTH-MUSCLE-CELL...  | GO-0048661    | 5    | -0.468740 | -1.024964 | 0.451664  | 0.692561  | 1.000      |
| 366 GOBP-PEPTIDE-METABOLIC-PROCESS                     | GO-0006518    | 12   | -0.346609 | -1.025600 | 0.433333  | 0.693190  | 1.000      |
| 367 GOBP-LIPID-BIOSYNTHETIC-PROCESS                    | GO-0008610    | 6    | -0.451636 | -1.026332 | 0.454839  | 0.693733  | 1.000      |
| 368 GOBP-REGULATION-OF-APOPTOTIC-SIGNALING-PATHWAY     | GO-2001233    | 10   | -0.373453 | -1.030180 | 0.437117  | 0.687802  | 1.000      |
| 369 GOBP-NEGATIVE-REGULATION-OF-MOLECULAR-FUNCTION     | GO-0044092    | 24   | -0.293879 | -1.036402 | 0.414734  | 0.677503  | 1.000      |
| 370 REACTOME-POST-TRANSLATIONAL-PROTEIN-MODIFICATION   | R-RNO-597592  | 7    | -0.424254 | -1.038582 | 0.413961  | 0.675090  | 1.000      |
| 371 GOBP-CHROMOSOME-ORGANIZATION                       | GO-0051276    | 6    | -0.455757 | -1.040464 | 0.432000  | 0.673184  | 1.000      |
| 372 GOBP-CELL-CYCLE                                    | GO-0007049    | 21   | -0.298989 | -1.041823 | 0.408392  | 0.672266  | 1.000      |
| 373 GOBP-CHROMATIN-ORGANIZATION                        | GO-0006325    | 5    | -0.477464 | -1.042114 | 0.429892  | 0.673624  | 1.000      |
| 374 GOBP-BIOLOGICAL-PROCESS-INVOLVED-IN-SYMBIOTIC....  | GO-004440     | 11   | -0.358102 | -1.043259 | 0.389706  | 0.673307  | 1.000      |
| 375 REACTOME-EXTRA-NUCLEAR-ESTROGEN-SIGNALING          | R-RNO-9009391 | 7    | -0.412535 | -1.043692 | 0.392638  | 0.674439  | 1.000      |
| 376 GOBP-REGULATION-OF-MAP-KINASE-ACTIVITY             | GO-0043405    | 9    | -0.396884 | -1.049881 | 0.399390  | 0.663867  | 1.000      |
| 377 GOBP-NEGATIVE-REGULATION-OF-ANION-TRANSPORT        | GO-1903792    | 8    | -0.413731 | -1.050368 | 0.425373  | 0.664755  | 1.000      |
| 378 GOBP-REGULATION-OF-LIPID-BIOSYNTHETIC-PROCESS      | GO-0046890    | 6    | -0.451636 | -1.050932 | 0.413399  | 0.665590  | 1.000      |
| 379 GOBP-CELL-MIGRATION                                | GO-0016477    | 22   | -0.299230 | -1.053247 | 0.391365  | 0.662799  | 1.000      |
| 380 GOBP-POSITIVE-REGULATION-OF-PROTEIN-METABOLIC-...  | GO-0051247    | 28   | -0.290077 | -1.053387 | 0.383064  | 0.664460  | 1.000      |
| 381 GOBP-ORGANIC-ACID-METABOLIC-PROCESS                | GO-0006082    | 7    | -0.423125 | -1.054399 | 0.418429  | 0.664417  | 1.000      |
| 382 GOBP-REGIONALIZATION                               | GO-0003002    | 6    | -0.457696 | -1.061866 | 0.388802  | 0.651247  | 1.000      |
| 383 GOBP-MULTICELLULAR-ORGANISM-REPRODUCTION           | GO-0032504    | 12   | -0.354333 | -1.061933 | 0.391176  | 0.653073  | 1.000      |
| 384 GOBP-MONOCARBOXYLIC-ACID-METABOLIC-PROCESS         | GO-0032787    | 6    | -0.467408 | -1.065208 | 0.407407  | 0.648238  | 1.000      |

Continuation of Table S19

| NAME | ID                                                | SIZE | ES        | NES       | NOM.p.val | FDR.q.val | FWER.p.val |
|------|---------------------------------------------------|------|-----------|-----------|-----------|-----------|------------|
| 385  | GOBP-TEMPERATURE.HOMEOSTASIS                      | 5    | -0.483173 | -1.065225 | 0.393365  | 0.650154  | 1.000      |
| 386  | GOBP-REGULATION.OF.CELLULAR.COMPONENT.SIZE        | 7    | -0.430674 | -1.065392 | 0.382540  | 0.651744  | 1.000      |
| 387  | GOBP-POSITIVE.REGULATION.OF.MOLECULAR.FUNCTION    | 38   | -0.281602 | -1.066679 | 0.374339  | 0.651023  | 1.000      |
| 388  | GOBP-MITOCHONDRION.ORGANIZATION                   | 7    | -0.424789 | -1.070054 | 0.379786  | 0.646119  | 1.000      |
| 389  | GOBP-REGULATION.OF.LIPID.LOCALIZATION             | 5    | -0.487070 | -1.070534 | 0.372287  | 0.647149  | 1.000      |
| 390  | GOBP-INORGANIC.ION.TRANSMEMBRANE.TRANSPORT        | 9    | -0.398262 | -1.071592 | 0.373874  | 0.646927  | 1.000      |
| 391  | GOBP-MONONUCLEAR.CELL.DIFFERENTIATION             | 7    | -0.440983 | -1.073382 | 0.381395  | 0.645323  | 1.000      |
| 392  | GOBP-REGULATION.OF.PEPTIDE-SECRETION              | 7    | -0.435257 | -1.074379 | 0.396605  | 0.645276  | 1.000      |
| 393  | GOBP-BEHAVIOR                                     | 32   | -0.287017 | -1.074908 | 0.363995  | 0.646104  | 1.000      |
| 394  | GOBP-RESPONSE.TO.DRUG                             | 11   | -0.382544 | -1.075417 | 0.383459  | 0.646951  | 1.000      |
| 395  | GOBP-PATTERN.SPECIFICATION.PROCESS                | 6    | -0.457696 | -1.077303 | 0.367852  | 0.645178  | 1.000      |
| 396  | HALEMARK.PI3K-AKT-MTOR-SIGNALING                  | 6    | -0.457696 | -1.077303 | 0.367852  | 0.645178  | 1.000      |
| 397  | GOBP-COAGULATION                                  | 8    | -0.412018 | -1.078993 | 0.355039  | 0.645687  | 1.000      |
| 398  | GOBP-POSITIVE.REGULATION.OF.CELL.GROWTH           | 6    | -0.457696 | -1.081262 | 0.371560  | 0.642900  | 1.000      |
| 399  | GOBP-APOPTOTIC.MITOCHONDRIAL.CHANGES              | 6    | -0.457707 | -1.083253 | 0.373089  | 0.640820  | 1.000      |
| 400  | GOBP-PEPTIDYL-SERINE.MODIFICATION                 | 12   | -0.369179 | -1.083884 | 0.359352  | 0.641730  | 1.000      |
| 401  | GOBP-PURINE.CONTAINING.COMPOUND.METABOLIC.PROCESS | 5    | -0.504696 | -1.087283 | 0.379147  | 0.637014  | 1.000      |
| 402  | GOBP-NEGATIVE.REGULATION.OF.CELL-CYCLE            | 5    | -0.489833 | -1.088109 | 0.352025  | 0.637399  | 1.000      |
| 403  | GOBP-REGULATION.OF.PEPTIDE.HORMONE-SECRETION      | 6    | -0.462238 | -1.090499 | 0.348800  | 0.634457  | 1.000      |
| 404  | GOBP-REGULATION.OF.PROTEIN.BINDING                | 7    | -0.446570 | -1.091029 | 0.359014  | 0.635339  | 1.000      |
| 405  | GOBP-RESPONSE.TO.OXYGEN.LEVELS                    | 8    | -0.417329 | -1.093067 | 0.361801  | 0.633135  | 1.000      |
| 406  | GOBP-POSITIVE.REGULATION.OF.MAPK-CASCADE          | 9    | -0.401725 | -1.097210 | 0.355725  | 0.626592  | 1.000      |
| 407  | GOBP-CYTOKINE-MEDIATED-SIGNALING.PATHWAY          | 16   | -0.344914 | -1.103342 | 0.350852  | 0.615894  | 1.000      |
| 408  | GOBP-ORGANIC-ACID-TRANSPORT                       | 7    | -0.442124 | -1.104464 | 0.344186  | 0.615520  | 1.000      |
| 409  | GOBP-REGULATION.OF.CELL.PROJECTION.ORGANIZATION   | 20   | -0.320244 | -1.104696 | 0.345481  | 0.616962  | 1.000      |
| 410  | GOBP-REGULATION.OF.CELLULAR.COMPONENT.MOVEMENT    | 15   | -0.355715 | -1.106169 | 0.330893  | 0.615865  | 1.000      |
| 411  | GOBP-REGULATION.OF-PHOSPHORUS.METABOLIC.PROCESS   | 27   | -0.304770 | -1.106267 | 0.318783  | 0.617643  | 1.000      |
| 412  | GOBP-NUCLEOBASE-CONTAINING.SMALL-MOLECULE.META... | 6    | -0.469581 | -1.111326 | 0.310680  | 0.609554  | 1.000      |
| 413  | GOBP-ADENYLATE-CYCLASE.MODULATING-G.PROTEIN.CO... | 11   | -0.392753 | -1.113992 | 0.321888  | 0.606260  | 1.000      |
| 414  | GOBP-POSITIVE.REGULATION.OF.PROTEIN-KINASE-ACT... | 19   | -0.334578 | -1.115983 | 0.330544  | 0.604244  | 1.000      |
| 415  | GOBP-REGULATION.OF-EPITHELIAL-CELL-MIGRATION      | 6    | -0.474950 | -1.116804 | 0.328051  | 0.604596  | 1.000      |
| 416  | GOBP-OSTEOBLAST-DIFFERENTIATION                   | 5    | -0.505072 | -1.119887 | 0.325434  | 0.600151  | 1.000      |
| 417  | GOBP-MEMORY                                       | 13   | -0.366294 | -1.121579 | 0.318314  | 0.598368  | 1.000      |
| 418  | GOBP-AMYLOID-PRECURSOR-PROTEIN.METABOLIC.PROCESS  | 5    | -0.513831 | -1.122059 | 0.323102  | 0.599330  | 1.000      |
| 419  | GOBP-ENDOCRINE.SYSTEM.DEVELOPMENT                 | 6    | -0.477092 | -1.123713 | 0.304085  | 0.598122  | 1.000      |
| 420  | GOBP-CELLULAR.COMPONENT.DISASSEMBLY               | 6    | -0.492541 | -1.123913 | 0.328125  | 0.599714  | 1.000      |
| 421  | GOBP-COGNITION                                    | 28   | -0.306297 | -1.124522 | 0.297151  | 0.600522  | 1.000      |
| 422  | GOBP-LIPID.METABOLIC.PROCESS                      | 10   | -0.401989 | -1.126219 | 0.302766  | 0.599110  | 1.000      |
| 423  | REACTOME.OPIOID-SIGNALING                         | 12   | -0.384285 | -1.128213 | 0.302147  | 0.597167  | 1.000      |
| 424  | GOBP-REGULATION.OF-SECRETION                      | 14   | -0.369306 | -1.130722 | 0.306452  | 0.593834  | 1.000      |
| 425  | GOBP-REGULATION.OF-PROTEIN-PHOSPHORYLATION        | 26   | -0.316306 | -1.131548 | 0.319559  | 0.594035  | 1.000      |
| 426  | GOBP-AMYLOID-PRECURSOR-PROTEIN.CATABOLIC.PROCESS  | 5    | -0.513831 | -1.131756 | 0.312893  | 0.595621  | 1.000      |
| 427  | GOBP-HEAD.DEVELOPMENT                             | 22   | -0.325822 | -1.132129 | 0.294444  | 0.596817  | 1.000      |

Continuation of Table S19

| NAME                                                  | ID           | SIZE | ES        | NES       | NOM.p.val | FDR.q.val | FWER.p.val |
|-------------------------------------------------------|--------------|------|-----------|-----------|-----------|-----------|------------|
| 428 GOBP-RESPONSE.TO.KETONE                           | GO-1901654   | 7    | -0.460814 | -1.132589 | 0.321212  | 0.597937  | 1.000      |
| 429 GOBP-RESPONSE.TO.OXYGEN.CONTAINING.COMPOUND       | GO-1901700   | 39   | -0.292916 | -1.133877 | 0.307798  | 0.597428  | 1.000      |
| 430 GOBP-REGULATION.OF.CELLULAR.LOCALIZATION          | GO-0060341   | 17   | -0.356823 | -1.134481 | 0.296719  | 0.598225  | 1.000      |
| 431 GOBP-TELENCEPHALON.DEVELOPMENT                    | GO-0021537   | 6    | -0.489302 | -1.136469 | 0.306154  | 0.596305  | 1.000      |
| 432 GOBP-REGULATION.OF.PROTEIN.LOCALIZATION           | GO-0032880   | 18   | -0.342539 | -1.136729 | 0.299572  | 0.597847  | 1.000      |
| 433 GOBP-POSITIVE.REGULATION.OF.ESTABLISHMENT.OF.P... | GO-1904951   | 5    | -0.531465 | -1.136807 | 0.292994  | 0.599756  | 1.000      |
| 434 GOBP-REGULATION.OF.CATION.TRANSMEMBRANE.TRANSPORT | GO-1904062   | 16   | -0.350513 | -1.136874 | 0.300429  | 0.601767  | 1.000      |
| 435 GOBP-POSITIVE.REGULATION.OF.SECRETION             | GO-0051047   | 6    | -0.483004 | -1.137199 | 0.307573  | 0.603158  | 1.000      |
| 436 GOBP-RESPONSE.TO.BACTERIUM                        | GO-0009617   | 13   | -0.376744 | -1.139488 | 0.303892  | 0.600476  | 1.000      |
| 437 GOBP-LIPID.LOCALIZATION                           | GO-0010876   | 10   | -0.413902 | -1.139589 | 0.291982  | 0.602350  | 1.000      |
| 438 GOBP-SKIN.DEVELOPMENT                             | GO-0043588   | 5    | -0.520756 | -1.139811 | 0.300161  | 0.604112  | 1.000      |
| 439 GOBP-CALCIUM.MEDIATED.SIGNALING                   | GO-0019722   | 10   | -0.410246 | -1.140862 | 0.298682  | 0.603952  | 1.000      |
| 440 REACTOME-TRAFFICKING.OF.AMPA.RECEPTORS            | R-RNO-399719 | 11   | -0.398962 | -1.140884 | 0.318043  | 0.606067  | 1.000      |
| 441 GOBP-RESPONSE.TO.TUMOR.NECROSIS.FACTOR            | GO-0034612   | 7    | -0.464982 | -1.141812 | 0.323752  | 0.606015  | 1.000      |
| 442 GOBP-RESPONSE.TO.MOLECULE.OF.BACTERIAL.ORIGIN     | GO-0002237   | 13   | -0.376744 | -1.142116 | 0.278393  | 0.607536  | 1.000      |
| 443 GOBP-HEART.DEVELOPMENT                            | GO-0007507   | 6    | -0.483281 | -1.142589 | 0.305556  | 0.608743  | 1.000      |
| 444 GOBP-ACTIVATION.OF.MAPK-ACTIVITY                  | GO-0000187   | 6    | -0.491622 | -1.143003 | 0.297420  | 0.610011  | 1.000      |
| 445 GOBP-CARDIAC.MUSCLE.TISSUE.DEVELOPMENT            | GO-0048738   | 6    | -0.483281 | -1.144317 | 0.292259  | 0.609397  | 1.000      |
| 446 GOBP-AMYLOID.BETA.METABOLIC.PROCESS               | GO-0050435   | 5    | -0.513831 | -1.146426 | 0.301092  | 0.607154  | 1.000      |
| 447 GOBP-CYTOSKELETON.ORGANIZATION                    | GO-0007010   | 11   | -0.398312 | -1.147816 | 0.280802  | 0.606504  | 1.000      |
| 448 GOBP-POSITIVE.REGULATION.OF.PROTEOLYSIS           | GO-0045862   | 8    | -0.441417 | -1.156338 | 0.284639  | 0.590180  | 1.000      |
| 449 GOBP-FATTY.ACID.TRANSPORT                         | GO-0015908   | 6    | -0.488282 | -1.156757 | 0.282012  | 0.591446  | 1.000      |
| 450 GOBP-NEGATIVE.REGULATION.OF.BINDING               | GO-0051100   | 6    | -0.500753 | -1.158003 | 0.302652  | 0.590846  | 1.000      |
| 451 GOBP-RESPONSE.TO.HORMONE                          | GO-0009725   | 20   | -0.349848 | -1.160979 | 0.276243  | 0.586734  | 1.000      |
| 452 GOBP-REGULATION.OF.CARBOHYDRATE.METABOLIC.PROCESS | GO-0006109   | 5    | -0.538005 | -1.161470 | 0.269663  | 0.587870  | 1.000      |
| 453 GOBP-REGULATION.OF.SYSTEM.PROCESS                 | GO-0044057   | 18   | -0.349048 | -1.161691 | 0.270156  | 0.589577  | 1.000      |
| 454 GOBP-POSITIVE.REGULATION.OF.LONG-TERM.SYNAPTIC... | GO-1900273   | 5    | -0.528088 | -1.162740 | 0.265244  | 0.589441  | 1.000      |
| 455 GOBP-POSITIVE.REGULATION.OF.TRANSFERASE-ACTIVITY  | GO-0051347   | 20   | -0.345124 | -1.162971 | 0.277008  | 0.591233  | 1.000      |
| 456 GOBP-REGULATION.OF.ANION.TRANSMEMBRANE.TRANSPORT  | GO-1903959   | 5    | -0.543331 | -1.166724 | 0.273322  | 0.585584  | 1.000      |
| 457 GOBP-REGULATION.OF.MAPK.CASCADE                   | GO-0043408   | 13   | -0.383372 | -1.167423 | 0.272597  | 0.586178  | 1.000      |
| 458 GOBP-REGULATION.OF.IMMUNE.SYSTEM.PROCESS          | GO-0002682   | 21   | -0.337135 | -1.167719 | 0.262319  | 0.587701  | 1.000      |
| 459 GOBP-LEUKOCYTE.MIGRATION                          | GO-0050900   | 6    | -0.512104 | -1.169182 | 0.278317  | 0.586481  | 1.000      |
| 460 GOBP-NEUROINFLAMMATORY.RESPONSE                   | GO-0150076   | 5    | -0.541722 | -1.169645 | 0.270313  | 0.587819  | 1.000      |
| 461 GOBP-POSITIVE.REGULATION.OF.MAP_KINASE-ACTIVITY   | GO-0043406   | 6    | -0.491622 | -1.169869 | 0.267188  | 0.589556  | 1.000      |
| 462 GOBP-POSTTRANSCRIPTIONAL.REGULATION.OF.GENE.EX... | GO-0010608   | 8    | -0.453214 | -1.172598 | 0.272152  | 0.585820  | 1.000      |
| 463 GOBP-CENTRAL.NERVOUS.SYSTEM.DEVELOPMENT           | GO-0007417   | 26   | -0.327907 | -1.172702 | 0.271093  | 0.587926  | 1.000      |
| 464 GOBP-SEXUAL.REPRODUCTION                          | GO-0019953   | 10   | -0.418138 | -1.172721 | 0.264012  | 0.590185  | 1.000      |
| 465 GOBP-POSITIVE.REGULATION.OF.PROTEIN.SERINE.THR... | GO-0071902   | 9    | -0.434921 | -1.177397 | 0.256966  | 0.581964  | 1.000      |
| 466 GOBP-CARBOHYDRATE.BIOSYNTHETIC.PROCESS            | GO-0016051   | 5    | -0.538005 | -1.178939 | 0.276295  | 0.580951  | 1.000      |
| 467 GOBP-MITOTIC.CELL.CYCLE                           | GO-0000278   | 10   | -0.418891 | -1.181548 | 0.246246  | 0.577580  | 1.000      |
| 468 GOBP-POSITIVE.REGULATION.OF.APOPTOTIC.SIGNALIN... | GO-2001235   | 5    | -0.538350 | -1.184676 | 0.242378  | 0.573012  | 1.000      |
| 469 GOBP-CELLULAR.RESPONSE.TO.NITROGEN.COMPOUND       | GO-1901699   | 20   | -0.344172 | -1.184750 | 0.259722  | 0.575144  | 1.000      |
| 470 GOBP-PHOSPHATIDYLINOSITOL.3.KINASE.SIGNALING      | GO-0014065   | 7    | -0.488598 | -1.193283 | 0.243750  | 0.558675  | 1.000      |

Continuation of Table S19

|     | NAME                                              | ID            | SIZE | ES        | NES       | NOM.p.val | FDR.q.val | FWER.p.val |
|-----|---------------------------------------------------|---------------|------|-----------|-----------|-----------|-----------|------------|
| 471 | GOBP-T-CELL-ACTIVATION                            | GO-0042110    | 8    | -0.455090 | -1.195040 | 0.255887  | 0.557188  | 1.000      |
| 472 | GOBP-REGULATION-OF-CARBOHYDRATE-BIOSYNTHETIC-P... | GO-0043255    | 5    | -0.538005 | -1.199603 | 0.233385  | 0.549619  | 1.000      |
| 473 | GOBP-IN-UTERO-EMBRYONIC-DEVELOPMENT               | GO-0001701    | 8    | -0.459415 | -1.199870 | 0.229358  | 0.551284  | 1.000      |
| 474 | GOBP-MAINTENANCE-OF-LOCATION                      | GO-0051235    | 7    | -0.489072 | -1.203225 | 0.241379  | 0.546513  | 1.000      |
| 475 | GOBP-EPHRIN-RECEPTOR-SIGNALING-PATHWAY            | GO-0048013    | 5    | -0.546727 | -1.204412 | 0.234921  | 0.546165  | 1.000      |
| 476 | GOBP-REGULATION-OF-ORGAN-GROWTH                   | GO-0046620    | 5    | -0.546824 | -1.204461 | 0.234528  | 0.548326  | 1.000      |
| 477 | GOBP-ORGANIC-HYDROXY-COMPOUND-TRANSPORT           | GO-0015850    | 6    | -0.508624 | -1.204714 | 0.237421  | 0.550031  | 1.000      |
| 478 | GOBP-REGULATION-OF-CELL-CYCLE                     | GO-0051726    | 13   | -0.391102 | -1.204743 | 0.240469  | 0.552240  | 1.000      |
| 479 | GOBP-CARBOHYDRATE-HOMEOSTASIS                     | GO-0033500    | 7    | -0.499021 | -1.204775 | 0.236392  | 0.554472  | 1.000      |
| 480 | GOBP-EPITHELIAL-CELL-PROLIFERATION                | GO-0050673    | 12   | -0.410303 | -1.204933 | 0.249645  | 0.556434  | 1.000      |
| 481 | REACTOME-ANTI-INFLAMMATORY-RESPONSE-FAVOURING...  | R-HSA-9662851 | 5    | -0.545676 | -1.205220 | 0.226006  | 0.557963  | 1.000      |
| 482 | GOBP-ORGAN-GROWTH                                 | GO-0035265    | 5    | -0.545676 | -1.205220 | 0.232372  | 0.556468  | 1.000      |
| 483 | GOBP-PROTEIN-COMPLEX-OLIGOMERIZATION              | GO-0051259    | 6    | -0.512195 | -1.207555 | 0.233282  | 0.557508  | 1.000      |
| 484 | GOBP-NEURON-PROJECTION-ORGANIZATION               | GO-0106027    | 8    | -0.474623 | -1.209028 | 0.234472  | 0.556660  | 1.000      |
| 485 | GOBP-REGULATION-OF-CATION-CHANNEL-ACTIVITY        | GO-2001257    | 14   | -0.393446 | -1.211686 | 0.236575  | 0.552824  | 1.000      |
| 486 | GOBP-ANATOMICAL-STRUCTURE-FORMATION-INVOLVED-I... | GO-0048646    | 20   | -0.361323 | -1.212468 | 0.234890  | 0.553507  | 1.000      |
| 487 | GOBP-G-PROTEIN-COUPLED-RECEPTOR-SIGNALING-PATHWAY | GO-0007186    | 18   | -0.370194 | -1.212754 | 0.222069  | 0.555236  | 1.000      |
| 488 | GOBP-INNATE-IMMUNE-RESPONSE                       | GO-0045087    | 7    | -0.492671 | -1.213076 | 0.223054  | 0.556841  | 1.000      |
| 489 | GOBP-CELLULAR-RESPONSE-TO-DNA-DAMAGE-STIMULUS     | GO-0006974    | 5    | -0.549407 | -1.213623 | 0.217391  | 0.557993  | 1.000      |
| 490 | GOBP-EMBRYONIC-MORPHOGENESIS                      | GO-0048598    | 6    | -0.515498 | -1.213743 | 0.224490  | 0.560115  | 1.000      |
| 491 | GOBP-HORMONE-TRANSPORT                            | GO-0009914    | 9    | -0.453956 | -1.214581 | 0.220521  | 0.560711  | 1.000      |
| 492 | REACTOME-LEISHMANIA-INFECTION                     | R-HSA-9658195 | 10   | -0.437418 | -1.217557 | 0.218182  | 0.556523  | 1.000      |
| 493 | GOBP-RESPONSE-TO-NICOTINE                         | GO-0035094    | 7    | -0.492001 | -1.217577 | 0.223765  | 0.558949  | 1.000      |
| 494 | GOBP-REGULATION-OF-TRANSPORT                      | GO-0051049    | 44   | -0.313415 | -1.218465 | 0.203974  | 0.559528  | 1.000      |
| 495 | GOBP-POSITIVE-REGULATION-OF-CELL-DEATH            | GO-0010942    | 19   | -0.368148 | -1.219931 | 0.213353  | 0.558773  | 1.000      |
| 496 | GOBP-REGULATION-OF-POSTSYNAPTIC-MEMBRANE-POTEN... | GO-0060078    | 14   | -0.398170 | -1.220125 | 0.248521  | 0.560843  | 1.000      |
| 497 | GOBP-RESPONSE-TO-ABIOTIC-STIMULUS                 | GO-0009628    | 27   | -0.332079 | -1.221049 | 0.216552  | 0.561226  | 1.000      |
| 498 | GOBP-REGULATION-OF-CELLULAR-COMPONENT-BIOGENESIS  | GO-0044087    | 10   | -0.436790 | -1.221276 | 0.236232  | 0.563217  | 1.000      |
| 499 | GOBP-NEGATIVE-REGULATION-OF-SYNAPTIC-TRANSMISSION | GO-0050805    | 6    | -0.527455 | -1.221517 | 0.216906  | 0.565200  | 1.000      |
| 500 | GOBP-GAMETE-GENERATION                            | GO-0007276    | 9    | -0.458359 | -1.222527 | 0.239819  | 0.565570  | 1.000      |
| 501 | GOBP-LYMPHOCYTE-ACTIVATION                        | GO-0046649    | 9    | -0.452148 | -1.222930 | 0.224961  | 0.567174  | 1.000      |
| 502 | REACTOME-INTERFERON-SIGNALING                     | R-RNO-913531  | 6    | -0.513568 | -1.225899 | 0.199690  | 0.562677  | 1.000      |
| 503 | GOBP-POSITIVE-REGULATION-OF-CYTOKINE-PRODUCTION   | GO-0001819    | 7    | -0.490150 | -1.226258 | 0.229904  | 0.564623  | 1.000      |
| 504 | REACTOME-L1CAM-INTERACTIONS                       | R-RNO-373760  | 5    | -0.569629 | -1.226452 | 0.185304  | 0.566697  | 1.000      |
| 505 | GOBP-REGULATION-OF-FAT-CELL-DIFFERENTIATION       | GO-0045598    | 6    | -0.519832 | -1.226634 | 0.215071  | 0.568850  | 1.000      |
| 506 | REACTOME-MEMBRANE-TRAFFICKING                     | R-RNO-199991  | 5    | -0.567644 | -1.231422 | 0.199336  | 0.559949  | 1.000      |
| 507 | REACTOME-VESICLE-MEDIATED-TRANSPORT               | R-RNO-5653656 | 5    | -0.567644 | -1.234194 | 0.207120  | 0.556313  | 1.000      |
| 508 | GOBP-RESPONSE-TO-NUTRIENT                         | GO-0007584    | 5    | -0.566265 | -1.235051 | 0.206557  | 0.553570  | 1.000      |
| 509 | GOBP-EXTRINSIC-APOPTOTIC-SIGNALING-PATHWAY        | GO-0097191    | 7    | -0.499437 | -1.237725 | 0.218009  | 0.553337  | 1.000      |
| 510 | GOBP-POSITIVE-REGULATION-OF-DEFENSE-RESPONSE      | GO-0031349    | 5    | -0.332754 | -1.240009 | 0.205329  | 0.550652  | 1.000      |
| 511 | GOBP-POSITIVE-REGULATION-OF-CATALYTIC-ACTIVITY    | GO-0043085    | 30   | -0.332754 | -1.241417 | 0.190728  | 0.550066  | 1.000      |
| 512 | GOBP-NEGATIVE-REGULATION-OF-CATABOLIC-PROCESS     | GO-0009895    | 8    | -0.474679 | -1.243397 | 0.213961  | 0.548192  | 1.000      |
| 513 | REACTOME-DEVELOPMENTAL-BIOLOGY                    | R-RNO-1266738 | 23   | -0.351760 | -1.243875 | 0.191781  | 0.549716  | 1.000      |



Continuation of Table S19

| NAME | ID                                                 | SIZE | ES        | NES       | NOM.p.val | FDR.q.val | FWER.p.val |
|------|----------------------------------------------------|------|-----------|-----------|-----------|-----------|------------|
| 514  | GOBP-REGULATION-OF-VASCULATURE-DEVELOPMENT         | 5    | -0.570549 | -1.246922 | 0.196694  | 0.545302  | 1.000      |
| 515  | GOBP-ASSOCIATIVE-LEARNING                          | 7    | -0.509752 | -1.249283 | 0.197869  | 0.542141  | 1.000      |
| 516  | GOBP-RESPONSE-TO-CYTOKINE                          | 23   | -0.361301 | -1.249424 | 0.188105  | 0.544495  | 1.000      |
| 517  | GOBP-VASCULATURE-DEVELOPMENT                       | 17   | -0.382477 | -1.250226 | 0.174785  | 0.545221  | 1.000      |
| 518  | GOBP-ANIMAL-ORGAN-MORPHOGENESIS                    | 12   | -0.419316 | -1.256274 | 0.210604  | 0.533583  | 1.000      |
| 519  | REACTOME-SIGNALING-BY-GPCR                         | 22   | -0.365841 | -1.256903 | 0.206327  | 0.534907  | 1.000      |
| 520  | GOBP-PHAGOCYTOSIS                                  | 5    | -0.572634 | -1.258110 | 0.179650  | 0.534639  | 1.000      |
| 521  | REACTOME-G-ALPHA-L-SIGNALING-EVENTS                | 18   | -0.384200 | -1.260236 | 0.175714  | 0.532272  | 1.000      |
| 522  | GOBP-PROTEIN-AUTOPHOSPHORYLATION                   | 5    | -0.569624 | -1.260647 | 0.176287  | 0.534069  | 1.000      |
| 523  | GOBP-POSITIVE-REGULATION-OF-CELL-ADHESION          | 7    | -0.504424 | -1.261099 | 0.204082  | 0.535748  | 1.000      |
| 524  | GOBP-ERK1-AND-ERK2-CASCADE                         | 5    | -0.571016 | -1.263284 | 0.189189  | 0.533315  | 1.000      |
| 525  | GOBP-SENSORY-PERCEPTION                            | 9    | -0.474957 | -1.264574 | 0.183486  | 0.533108  | 1.000      |
| 526  | REACTOME-INTRACELLULAR-SIGNALING-BY-SECOND-MES...  | 15   | -0.396819 | -1.264710 | 0.184319  | 0.535607  | 1.000      |
| 527  | GOBP-RESPONSE-TO-ORGANIC-CYCLIC-COMPOUND           | 20   | -0.377711 | -1.264952 | 0.178218  | 0.537722  | 1.000      |
| 528  | GOBP-INFLAMMATORY-RESPONSE                         | 12   | -0.427786 | -1.270050 | 0.186047  | 0.528770  | 1.000      |
| 529  | REACTOME-G-PROTEIN-MEDIATED-EVENTS                 | 9    | -0.470248 | -1.272588 | 0.188707  | 0.525519  | 1.000      |
| 530  | GOBP-CIRCULATORY-SYSTEM-DEVELOPMENT                | 21   | -0.373626 | -1.279667 | 0.189373  | 0.511963  | 1.000      |
| 531  | REACTOME-TRANSCRIPTIONAL-REGULATION-BY-MECP2       | 7    | -0.523311 | -1.281195 | 0.161481  | 0.511060  | 1.000      |
| 532  | GOBP-POSITIVE-REGULATION-OF-CELLULAR-COMPONENT...  | 9    | -0.483154 | -1.281937 | 0.167656  | 0.512010  | 1.000      |
| 533  | GOBP-LONG-TERM-SYNAPTIC-DEPRESSION                 | 5    | -0.588178 | -1.282561 | 0.161695  | 0.513440  | 1.000      |
| 534  | GOBP-CIRCULATORY-SYSTEM-PROCESS                    | 5    | -0.584403 | -1.283104 | 0.154560  | 0.514891  | 1.000      |
| 535  | GOBP-BLOOD-VESSEL-MORPHOGENESIS                    | 14   | -0.419025 | -1.284355 | 0.168103  | 0.514604  | 1.000      |
| 536  | GOBP-CELLULAR-RESPONSE-TO-KETONE                   | 5    | -0.593023 | -1.288191 | 0.164110  | 0.508849  | 1.000      |
| 537  | GOBP-CELLULAR-RESPONSE-TO-MOLECULE-OF-BACTERIA...  | 8    | -0.501819 | -1.289122 | 0.165615  | 0.509438  | 1.000      |
| 538  | GOBP-REGULATION-OF-CELLULAR-PROTEIN-LOCALIZATION   | 12   | -0.433045 | -1.293586 | 0.150972  | 0.501685  | 1.000      |
| 539  | GOBP-PEPTIDE-SECRETION                             | 9    | -0.481040 | -1.295741 | 0.186364  | 0.499634  | 1.000      |
| 540  | GOBP-SECRETION                                     | 24   | -0.365882 | -1.299166 | 0.157025  | 0.494901  | 1.000      |
| 541  | GOBP-EMBRYO-DEVELOPMENT                            | 14   | -0.421062 | -1.301056 | 0.164575  | 0.493515  | 1.000      |
| 542  | GOBP-CELLULAR-RESPONSE-TO-BIOTIC-STIMULUS          | 8    | -0.501819 | -1.301787 | 0.162003  | 0.494651  | 1.000      |
| 543  | GOBP-MONAMINE-TRANSPORT                            | 5    | -0.598248 | -1.307422 | 0.144026  | 0.484616  | 1.000      |
| 544  | GOBP-REGULATION-OF-TRANSPORTER-ACTIVITY            | 17   | -0.393676 | -1.309685 | 0.166667  | 0.482440  | 1.000      |
| 545  | GOBP-CELLULAR-RESPONSE-TO-HORMONE-STIMULUS         | 11   | -0.454816 | -1.310839 | 0.146747  | 0.482734  | 1.000      |
| 546  | GOBP-DENDRITIC-SPINE-MORPHOGENESIS                 | 5    | -0.599045 | -1.311494 | 0.159869  | 0.484130  | 1.000      |
| 547  | GOBP-POSITIVE-REGULATION-OF-IMMUNE-RESPONSE        | 9    | -0.487429 | -1.311855 | 0.148710  | 0.486172  | 1.000      |
| 548  | GOBP-REGULATION-OF-CATABOLIC-PROCESS               | 13   | -0.432216 | -1.313775 | 0.163324  | 0.484715  | 1.000      |
| 549  | GOBP-REGULATION-OF-PROTEIN-KINASE-ACTIVITY         | 22   | -0.380570 | -1.319553 | 0.143875  | 0.474411  | 1.000      |
| 550  | GOBP-MEMBRANE-ORGANIZATION                         | 12   | -0.440024 | -1.321384 | 0.157083  | 0.473365  | 1.000      |
| 551  | GOBP-REGULATION-OF-TRANSFERASE-ACTIVITY            | 22   | -0.380570 | -1.323464 | 0.142857  | 0.472733  | 1.000      |
| 552  | GOBP-INSULIN-SECRETION                             | 7    | -0.540570 | -1.323464 | 0.158400  | 0.474060  | 1.000      |
| 553  | GOBP-REGULATION-OF-MEMBRANE-POTENTIAL              | 17   | -0.401530 | -1.323477 | 0.149931  | 0.476888  | 1.000      |
| 554  | GOBP-REGULATION-OF-LONG-TERM-SYNAPTIC-POTENTIAL... | 6    | -0.558430 | -1.326098 | 0.147152  | 0.473977  | 1.000      |
| 555  | GOBP-CELLULAR-RESPONSE-TO-PEPTIDE-HORMONE-STIM...  | 9    | -0.494963 | -1.326667 | 0.149701  | 0.475469  | 1.000      |
| 556  | GOBP-REGULATION-OF-BODY-FLUID-LEVELS               | 11   | -0.460312 | -1.326765 | 0.130631  | 0.478170  | 1.000      |

Continuation of Table S19

| NAME                                                  | ID            | SIZE | ES        | NES       | NOM.p.val | FDR.q.val | FWER.p.val |
|-------------------------------------------------------|---------------|------|-----------|-----------|-----------|-----------|------------|
| 557 GOBP-EMBRYONIC-ORGAN-DEVELOPMENT                  | GO-0048568    | 7    | -0.53119  | -1.328820 | 0.135671  | 0.476362  | 1.000      |
| 558 GOBP-RESPONSE-TO-ACID-CHEMICAL                    | GO-0001101    | 6    | -0.560792 | -1.329695 | 0.142420  | 0.477103  | 1.000      |
| 559 REACTOME-DISEASES-OF-SIGNAL-TRANSDUCTION-BY-GR... | R-HSA-5663202 | 12   | -0.450596 | -1.331092 | 0.133523  | 0.476550  | 1.000      |
| 560 GOBP-CATION-TRANSMEMBRANE-TRANSPORT               | GO-0098655    | 18   | -0.401962 | -1.332976 | 0.146067  | 0.475067  | 1.000      |
| 561 GOBP-GLUTAMATE-RECEPTOR-SIGNALING-PATHWAY         | GO-0007215    | 17   | -0.409920 | -1.332294 | 0.136691  | 0.472916  | 1.000      |
| 562 GOBP-REGULATION-OF-LYMPHOCYTE-ACTIVATION          | GO-0051249    | 5    | -0.609746 | -1.337698 | 0.115445  | 0.470481  | 1.000      |
| 563 GOBP-PEPTIDE-BIOSYNTHETIC-PROCESS                 | GO-0043043    | 7    | -0.550471 | -1.338581 | 0.114062  | 0.471559  | 1.000      |
| 564 GOBP-PROTEIN-KINASE-B-SIGNALING                   | GO-0043491    | 6    | -0.571452 | -1.340615 | 0.117371  | 0.469880  | 1.000      |
| 565 GOBP-NERVOUS-SYSTEM-PROCESS                       | GO-0050877    | 38   | -0.353650 | -1.343867 | 0.131649  | 0.465254  | 1.000      |
| 566 GOBP-REGULATION-OF-NEUROTRANSMITTER-TRANSPORT     | GO-0051588    | 6    | -0.571740 | -1.345454 | 0.130631  | 0.464630  | 1.000      |
| 567 GOBP-REGULATION-OF-ION-TRANSPORT                  | GO-0043269    | 36   | -0.355551 | -1.345570 | 0.128415  | 0.467416  | 1.000      |
| 568 REACTOME-INFECTIOUS-DISEASE                       | R-HSA-5663205 | 13   | -0.449653 | -1.346975 | 0.147710  | 0.467423  | 1.000      |
| 569 REACTOME-MAPK-FAMILY-SIGNALING-CASCADES           | R-RNO-5683057 | 12   | -0.459249 | -1.347573 | 0.135258  | 0.469139  | 1.000      |
| 570 GOBP-PEPTIDE-HORMONE-SECRETION                    | GO-0030072    | 7    | -0.540570 | -1.349861 | 0.125758  | 0.467347  | 1.000      |
| 571 GOBP-MATERNAL-PROCESS-INVOLVED-IN-FEMALE-PREGN... | GO-0060135    | 5    | -0.616936 | -1.350344 | 0.115016  | 0.469452  | 1.000      |
| 572 GOBP-LEARNING                                     | GO-0007612    | 13   | -0.446031 | -1.351147 | 0.119708  | 0.470804  | 1.000      |
| 573 GOBP-REGULATION-OF-DNA-BINDING-TRANSCRIPTION.F... | GO-0051090    | 16   | -0.422064 | -1.353097 | 0.131653  | 0.469540  | 1.000      |
| 574 GOBP-TUBE-DEVELOPMENT                             | GO-0035295    | 18   | -0.404631 | -1.353511 | 0.120433  | 0.471772  | 1.000      |
| 575 GOBP-REGULATION-OF-CELLULAR-AMIDE-METABOLIC.PR... | GO-0034248    | 9    | -0.504229 | -1.353689 | 0.120611  | 0.474597  | 1.000      |
| 576 GOBP-METAL-ION-TRANSPORT                          | GO-0030001    | 11   | -0.474680 | -1.354806 | 0.123907  | 0.475138  | 1.000      |
| 577 GOBP-POSITIVE-REGULATION-OF-IMMUNE-SYSTEM-PROCESS | GO-0002684    | 18   | -0.412335 | -1.355853 | 0.131728  | 0.476100  | 1.000      |
| 578 GOBP-HOMEOSTASIS-OF-NUMBER-OF-CELLS               | GO-0048872    | 5    | -0.600912 | -1.356267 | 0.118859  | 0.478422  | 1.000      |
| 579 GOBP-MAPK-CASCADE                                 | GO-0000165    | 18   | -0.408262 | -1.360107 | 0.130560  | 0.472406  | 1.000      |
| 580 GOBP-GLAND-DEVELOPMENT                            | GO-0048732    | 7    | -0.545173 | -1.364767 | 0.087500  | 0.465332  | 1.000      |
| 581 GOBP-REGULATION-OF-LIPID-METABOLIC-PROCESS        | GO-0019216    | 7    | -0.554776 | -1.369639 | 0.111614  | 0.456912  | 1.000      |
| 582 GOBP-SENSORY-ORGAN-DEVELOPMENT                    | GO-0007423    | 8    | -0.528165 | -1.373030 | 0.126657  | 0.452446  | 1.000      |
| 583 GOBP-POSITIVE-REGULATION-OF-SMALL-MOLECULE-MET... | GO-0062013    | 5    | -0.629364 | -1.375097 | 0.098592  | 0.450887  | 1.000      |
| 584 GOBP-NEURON-MIGRATION                             | GO-0001764    | 5    | -0.628224 | -1.375136 | 0.109635  | 0.454174  | 1.000      |
| 585 GOBP-CALCIUM-ION-TRANSPORT                        | GO-0006816    | 11   | -0.474680 | -1.376588 | 0.121037  | 0.454185  | 1.000      |
| 586 REACTOME-EPH-EPHRIN-SIGNALING                     | R-RNO-2682334 | 6    | -0.589306 | -1.378982 | 0.111111  | 0.452091  | 1.000      |
| 587 GOBP-LEUKOCYTE-CELL-CELL-ADHESION                 | GO-0007159    | 6    | -0.589032 | -1.380513 | 0.093991  | 0.452025  | 1.000      |
| 588 GOBP-AMIDE-BIOSYNTHETIC-PROCESS                   | GO-0043604    | 7    | -0.550471 | -1.382719 | 0.109063  | 0.450463  | 1.000      |
| 589 GOBP-REGULATION-OF-CELL-ADHESION                  | GO-0030155    | 13   | -0.461229 | -1.382864 | 0.107143  | 0.453542  | 1.000      |
| 590 GOBP-ACTIN-FILAMENT-BASED-PROCESS                 | GO-0030029    | 7    | -0.567215 | -1.386808 | 0.104651  | 0.447770  | 1.000      |
| 591 GOBP-CARBOHYDRATE-DERIVATIVE-METABOLIC-PROCESS    | GO-1901135    | 7    | -0.544695 | -1.387697 | 0.107765  | 0.449276  | 1.000      |
| 592 GOBP-ACTIVATION-OF-PROTEIN-KINASE-ACTIVITY        | GO-0032147    | 11   | -0.477842 | -1.387876 | 0.110795  | 0.452460  | 1.000      |
| 593 GOBP-CELL-SURFACE-RECEPTOR-SIGNALING-PATHWAY.I... | GO-1905114    | 15   | -0.448187 | -1.388299 | 0.104499  | 0.454937  | 1.000      |
| 594 GOBP-RESPONSE-TO-LIPID                            | GO-0033993    | 19   | -0.421497 | -1.389190 | 0.110169  | 0.456226  | 1.000      |
| 595 GOBP-PLATELET-ACTIVATION                          | GO-0030168    | 6    | -0.585410 | -1.390205 | 0.100154  | 0.457457  | 1.000      |
| 596 GOBP-LOCOMOTORY-BEHAVIOR                          | GO-0007626    | 7    | -0.573009 | -1.391185 | 0.082803  | 0.458931  | 1.000      |
| 597 GOBP-DEFENSE-RESPONSE-TO-OTHER-ORGANISM           | GO-0098542    | 9    | -0.512433 | -1.391623 | 0.089706  | 0.461525  | 1.000      |
| 598 GOBP-CELLULAR-LIPID-METABOLIC-PROCESS             | GO-0044255    | 7    | -0.552009 | -1.392030 | 0.099071  | 0.464183  | 1.000      |
| 599 GOBP-CELL-ACTIVATION                              | GO-0001775    | 21   | -0.402232 | -1.394754 | 0.102703  | 0.461494  | 1.000      |

Continuation of Table S19

| NAME                                                  | ID            | SIZE | ES        | NES       | NOM.p.val | FDR.q.val | FWER.p.val |
|-------------------------------------------------------|---------------|------|-----------|-----------|-----------|-----------|------------|
| 600 REACTOME-DAG-AND-IP3-SIGNALING                    | R-RNO-1489509 | 8    | -0.532998 | -1.395594 | 0.091757  | 0.463483  | 1.000      |
| 601 REACTOME-ESTROGEN-DEPENDENT-NUCLEAR-EVENTS.DOW... | R-RNO-9634638 | 5    | -0.644819 | -1.398937 | 0.092800  | 0.458940  | 1.000      |
| 602 GOBP-REGULATION-OF-SYNAPSE-STRUCTURE-OR-ACTIVITY  | GO-0050803    | 11   | -0.493107 | -1.399041 | 0.100149  | 0.462513  | 1.000      |
| 603 GOBP-REGULATION-OF-TRANSMEMBRANE-TRANSPORT        | GO-0034762    | 23   | -0.395083 | -1.399124 | 0.108635  | 0.466299  | 1.000      |
| 604 GOBP-IMPORT-INTO-CELL                             | GO-0098657    | 6    | -0.608864 | -1.416063 | 0.083462  | 0.429288  | 1.000      |
| 605 GOBP-DEFENSE-RESPONSE                             | GO-0006952    | 19   | -0.423416 | -1.416133 | 0.093750  | 0.432970  | 1.000      |
| 606 GOBP-POSITIVE-REGULATION-OF-EPITHELIAL-CELL-PR... | GO-0050679    | 7    | -0.578217 | -1.417640 | 0.096367  | 0.433237  | 1.000      |
| 607 GOBP-POSTSYNAPSE-ORGANIZATION                     | GO-0099173    | 10   | -0.497259 | -1.420517 | 0.109774  | 0.429686  | 1.000      |
| 608 GOBP-REGULATION-OF-PROTEIN-SERINE-THREONINE-KI... | GO-0071900    | 12   | -0.488818 | -1.422382 | 0.105030  | 0.428992  | 1.000      |
| 609 GOBP-CELLULAR-RESPONSE-TO-ALCOHOL                 | GO-0097306    | 5    | -0.651170 | -1.425066 | 0.068643  | 0.426362  | 1.000      |
| 610 REACTOME-CA-DEPENDENT-EVENTS                      | R-RNO-111996  | 8    | -0.547443 | -1.428880 | 0.079193  | 0.421109  | 1.000      |
| 611 GOBP-REGULATION-OF-METAL-ION-TRANSPORT            | GO-0010959    | 6    | -0.614436 | -1.432021 | 0.091054  | 0.417668  | 1.000      |
| 612 GOBP-CHEMICAL-SYNAPTIC-TRANSMISSION-POSTSYNAPTIC  | GO-0099565    | 9    | -0.528614 | -1.432541 | 0.094453  | 0.420176  | 1.000      |
| 613 GOBP-TISSUE-HOMEOSTASIS                           | GO-0001894    | 5    | -0.657539 | -1.433148 | 0.064516  | 0.422534  | 1.000      |
| 614 GOBP-POSITIVE-REGULATION-OF-ENDOTHELIAL-CELL-P... | GO-0001938    | 6    | -0.624595 | -1.442753 | 0.072231  | 0.404969  | 1.000      |
| 615 GOBP-AMEBOIDAL-TYPE-CELL-MIGRATION                | GO-0001667    | 11   | -0.512086 | -1.444559 | 0.083333  | 0.404701  | 1.000      |
| 616 GOBP-ORGANONITROGEN-COMPOUND-BIOSYNTHETIC-PROCESS | GO-1901566    | 13   | -0.486044 | -1.444572 | 0.071953  | 0.408585  | 1.000      |
| 617 GOBP-POSITIVE-REGULATION-OF-ION-TRANSPORT         | GO-0043270    | 17   | -0.446042 | -1.451748 | 0.071625  | 0.396230  | 1.000      |
| 618 GOBP-TUBE-MORPHOGENESIS                           | GO-0035239    | 15   | -0.469390 | -1.454345 | 0.064378  | 0.394332  | 1.000      |
| 619 GOBP-EMBRYO-DEVELOPMENT-ENDING-IN-BIRTH-OR-EGG... | GO-0009792    | 9    | -0.541175 | -1.455118 | 0.071964  | 0.396393  | 1.000      |
| 620 GOBP-PROTEIN-LOCALIZATION-TO-PLASMA-MEMBRANE      | GO-0072659    | 7    | -0.585726 | -1.466549 | 0.069291  | 0.395854  | 1.000      |
| 621 GOBP-SYNAPSE-ORGANIZATION                         | GO-0050808    | 17   | -0.454425 | -1.466549 | 0.067659  | 0.378477  | 1.000      |
| 622 GOBP-PROTEIN-PHOSPHORYLATION                      | GO-0006468    | 34   | -0.386669 | -1.467295 | 0.071332  | 0.380543  | 1.000      |
| 623 GOBP-PROTEIN-LOCALIZATION-TO-POSTSYNAPSE          | GO-0062237    | 5    | -0.672227 | -1.470965 | 0.060897  | 0.376563  | 1.000      |
| 624 GOBP-POSITIVE-REGULATION-OF-ANION-TRANSPORT       | GO-1903793    | 9    | -0.553478 | -1.477057 | 0.066566  | 0.367605  | 1.000      |
| 625 GOBP-REGULATION-OF-CELLULAR-CATABOLIC-PROCESS     | GO-0031329    | 10   | -0.537397 | -1.479244 | 0.051593  | 0.366640  | 1.000      |
| 626 GOBP-RESPIRATORY-SYSTEM-DEVELOPMENT               | GO-0060541    | 6    | -0.626841 | -1.482244 | 0.056782  | 0.364355  | 1.000      |
| 627 GOBP-CYTOSOLIC-CALCIUM-ION-TRANSPORT              | GO-0060401    | 7    | -0.609325 | -1.482586 | 0.061947  | 0.367604  | 1.000      |
| 628 GOBP-PROTEIN-LOCALIZATION-TO-SYNAPSE              | GO-0035418    | 5    | -0.672227 | -1.483414 | 0.047468  | 0.369518  | 1.000      |
| 629 GOBP-CELL-JUNCTION-ASSEMBLY                       | GO-0034329    | 8    | -0.576809 | -1.484034 | 0.066874  | 0.372058  | 1.000      |
| 630 REACTOME-ONCOGENIC-MAPK-SIGNALING                 | R-HSA-6802957 | 5    | -0.676784 | -1.489062 | 0.041401  | 0.364767  | 1.000      |
| 631 GOBP-ENDOTHELIAL-CELL-PROLIFERATION               | GO-0001935    | 8    | -0.578586 | -1.490484 | 0.056662  | 0.365591  | 1.000      |
| 632 GOBP-DENDRITIC-SPINE-DEVELOPMENT                  | GO-0060996    | 6    | -0.637936 | -1.495950 | 0.049844  | 0.358155  | 1.000      |
| 633 GOBP-CALCIUM-ION-TRANSPORT-INTO-CYTOSOL           | GO-0060402    | 7    | -0.609325 | -1.497642 | 0.059724  | 0.358664  | 1.000      |
| 634 GOBP-CELLULAR-HOMEOSTASIS                         | GO-0019725    | 18   | -0.464489 | -1.499157 | 0.055398  | 0.359548  | 1.000      |
| 635 GOBP-REGULATION-OF-ENDOTHELIAL-CELL-MIGRATION     | GO-0010594    | 5    | -0.687709 | -1.506538 | 0.044481  | 0.347189  | 1.000      |
| 636 GOBP-RESPONSE-TO-ETHANOL                          | GO-0045471    | 5    | -0.701938 | -1.513302 | 0.032915  | 0.338450  | 1.000      |
| 637 GOBP-REGULATION-OF-CELL-ACTIVATION                | GO-0050865    | 8    | -0.587446 | -1.514668 | 0.054773  | 0.339581  | 1.000      |
| 638 GOBP-NEGATIVE-REGULATION-OF-LIPID-METABOLIC-PR... | GO-0045833    | 5    | -0.692033 | -1.514924 | 0.036050  | 0.343250  | 1.000      |
| 639 GOBP-SPROUTING-ANGIOGENESIS                       | GO-0002040    | 5    | -0.694896 | -1.523025 | 0.042879  | 0.329679  | 1.000      |
| 640 GOBP-CATION-TRANSPORT                             | GO-0006812    | 25   | -0.430202 | -1.523611 | 0.045330  | 0.332702  | 1.000      |
| 641 REACTOME-NEUREXINS-AND-NEUROLIGINS                | R-RNO-6794361 | 9    | -0.566586 | -1.524936 | 0.044709  | 0.334261  | 1.000      |
| 642 GOBP-POSITIVE-REGULATION-OF-DNA-BINDING-TRANSC... | GO-0051091    | 10   | -0.543097 | -1.527402 | 0.043091  | 0.333168  | 1.000      |

Continuation of Table S19

|     | NAME                                              | ID            | SIZE | ES        | NES       | NOM.p.val | FDR.q.val | FWER.p.val |
|-----|---------------------------------------------------|---------------|------|-----------|-----------|-----------|-----------|------------|
| 643 | GOBP-RESPONSE.TO.TEMPERATURE.STIMULUS             | GO-0009266    | 9    | -0.581502 | -1.527997 | 0.026393  | 0.336107  | 1.000      |
| 644 | GOBP-HOMEOSTATIC.PROCESS                          | GO-0042592    | 31   | -0.416435 | -1.528865 | 0.038822  | 0.338393  | 1.000      |
| 645 | GOBP-EPITHELIAL.DEVELOPMENT                       | GO-0060429    | 15   | -0.483532 | -1.533457 | 0.053672  | 0.333036  | 1.000      |
| 646 | GOBP-MONOSACCHARIDE.METABOLIC.PROCESS             | GO-0005996    | 6    | -0.648945 | -1.535324 | 0.046584  | 0.333685  | 1.000      |
| 647 | GOBP-POSITIVE.REGULATION.OF.LEUKOCYTE.CELL.CEL... | GO-1903039    | 5    | -0.704221 | -1.536566 | 0.038400  | 0.335698  | 1.000      |
| 648 | GOBP-REGULATION.OF.PROTEIN.LOCALIZATION.TO.MEM... | GO-1906475    | 7    | -0.614175 | -1.536597 | 0.039002  | 0.340377  | 1.000      |
| 649 | GOBP-REGULATION.OF.MITOTIC.CELL.CYCLE             | GO-0007346    | 5    | -0.702046 | -1.537972 | 0.036107  | 0.342601  | 1.000      |
| 650 | GOBP-REGULATION.OF.TRANS.SYNAPTIC.SIGNALING       | GO-0009177    | 40   | -0.399298 | -1.540052 | 0.034574  | 0.342755  | 1.000      |
| 651 | GOBP-BIOLOGICAL.ADHESION                          | GO-0022610    | 19   | -0.463707 | -1.542025 | 0.042936  | 0.343676  | 1.000      |
| 652 | REACTOME-PROTEIN.PROTEIN.INTERACTIONS.AT.SYNAPSES | R-RNO-6794362 | 12   | -0.533407 | -1.543097 | 0.046899  | 0.346338  | 1.000      |
| 653 | GOBP-RESPONSE.TO.BIOTIC.STIMULUS                  | GO-0009607    | 17   | -0.481567 | -1.545354 | 0.043228  | 0.346602  | 1.000      |
| 654 | GOBP-POSITIVE.REGULATION.OF.SIGNALING             | GO-0023056    | 34   | -0.408622 | -1.547248 | 0.035480  | 0.347697  | 1.000      |
| 655 | GOBP-CALCIUM-ION.TRANSMEMBRANE.TRANSPORT          | GO-0070588    | 7    | -0.609325 | -1.548876 | 0.036741  | 0.349279  | 1.000      |
| 656 | GOBP-GLUCOSE.METABOLIC.PROCESS                    | GO-0006006    | 6    | -0.648945 | -1.551068 | 0.043614  | 0.349803  | 1.000      |
| 657 | GOBP-REGULATION.OF.PROTEIN.LOCALIZATION.TO.CEL... | GO-1904375    | 6    | -0.660698 | -1.558760 | 0.035484  | 0.338178  | 1.000      |
| 658 | GOBP-CHEMICAL.HOMEOSTASIS                         | GO-0048878    | 23   | -0.440941 | -1.566298 | 0.045961  | 0.327065  | 1.000      |
| 659 | GOBP-POSITIVE.REGULATION.OF.CELL.CELL.ADHESION    | GO-0022409    | 5    | -0.704221 | -1.569203 | 0.020833  | 0.326644  | 1.000      |
| 660 | GOBP-CELL.CELL.JUNCTION.ASSEMBLY                  | GO-0007043    | 5    | -0.731175 | -1.574314 | 0.020701  | 0.321685  | 1.000      |
| 661 | GOBP-CELLULAR.RESPONSE.TO.ORGANIC.CYCLIC.COMPOUND | GO-0071407    | 13   | -0.520332 | -1.584871 | 0.044978  | 0.304318  | 1.000      |
| 662 | GOBP-SMALL.MOLECULE.METABOLIC.PROCESS             | GO-0044281    | 15   | -0.506576 | -1.585161 | 0.031343  | 0.308917  | 1.000      |
| 663 | GOBP-REGULATION.OF-NEUROTRANSMITTER.RECEPTOR.A... | GO-0099601    | 9    | -0.535129 | -1.585931 | 0.027818  | 0.313133  | 1.000      |
| 664 | GOBP-REGULATION.OF.CELL.CELL.ADHESION             | GO-0022407    | 13   | -0.595247 | -1.587014 | 0.032305  | 0.316746  | 1.000      |
| 665 | GOBP-ION.HOMEOSTASIS                              | GO-0050801    | 16   | -0.502610 | -1.587008 | 0.023876  | 0.322501  | 1.000      |
| 666 | GOBP-PROTEIN.LOCALIZATION.TO.CELL.JUNCTION        | GO-1902414    | 6    | -0.693762 | -1.591490 | 0.014241  | 0.319366  | 1.000      |
| 667 | GOBP-CELL.JUNCTION.ORGANIZATION                   | GO-0034330    | 19   | -0.480441 | -1.593919 | 0.031073  | 0.320600  | 1.000      |
| 668 | GOBP-REGULATION.OF-NMDA.RECEPTOR.ACTIVITY         | GO-2000310    | 10   | -0.560693 | -1.594472 | 0.025037  | 0.325689  | 1.000      |
| 669 | GOBP-NEGATIVE.REGULATION.OF.LOCOMOTION            | GO-0040013    | 5    | -0.712905 | -1.597060 | 0.030945  | 0.326241  | 1.000      |
| 670 | GOBP-NEUROTRANSMITTER.TRANSPORT                   | GO-0006836    | 7    | -0.650850 | -1.607798 | 0.033846  | 0.307398  | 1.000      |
| 671 | GOBP-LONG-TERM.MEMORY                             | GO-0007616    | 6    | -0.701639 | -1.610295 | 0.017134  | 0.307980  | 1.000      |
| 672 | GOBP-TRANSMEMBRANE.TRANSPORT                      | GO-0072657    | 27   | -0.449229 | -1.610499 | 0.019894  | 0.313933  | 1.000      |
| 673 | GOBP-PROTEIN.LOCALIZATION.TO.MEMBRANE             | GO-0072657    | 14   | -0.518001 | -1.619715 | 0.032164  | 0.300818  | 1.000      |
| 674 | GOBP-REGULATION.OF.EXTRINSIC.APOPTOTIC.SIGNALI... | GO-2001236    | 6    | -0.686812 | -1.622524 | 0.019449  | 0.300929  | 1.000      |
| 675 | GOBP-CELL.CELL.JUNCTION.ORGANIZATION              | GO-0045216    | 6    | -0.679886 | -1.622891 | 0.018349  | 0.306918  | 1.000      |
| 676 | REACTOME-NEURONAL.SYSTEM                          | R-RNO-112316  | 26   | -0.449025 | -1.625147 | 0.025210  | 0.308451  | 1.000      |
| 677 | GOBP-REGULATION.OF.CELLULAR.RESPONSE.TO.STRESS    | GO-0080135    | 9    | -0.607338 | -1.626709 | 0.024818  | 0.312643  | 1.000      |
| 678 | GOBP-NEUROTRANSMITTER.SECRETION                   | GO-0007269    | 5    | -0.699857 | -1.629409 | 0.021309  | 0.313798  | 1.000      |
| 679 | GOBP-EXCITATORY.CHEMICAL.SYNAPTIC.TRANSMISSION    | GO-0098976    | 5    | -0.734940 | -1.629608 | 0.014516  | 0.321232  | 1.000      |
| 680 | GOBP-PROTEIN-CONTAINING.COMPLEX.SUBUNIT.ORGANI... | GO-0043933    | 14   | -0.531547 | -1.632389 | 0.021930  | 0.323768  | 1.000      |
| 681 | GOBP-CELLULAR.RESPONSE.TO.LIPID                   | GO-0071396    | 15   | -0.514470 | -1.634339 | 0.024390  | 0.327604  | 1.000      |
| 682 | GOBP-ANATOMICAL.STRUCTURE.HOMEOSTASIS             | GO-0060249    | 7    | -0.670165 | -1.634582 | 0.013333  | 0.335888  | 1.000      |
| 683 | GOBP-REGULATION.OF-NEUROTRANSMITTER.LEVELS        | GO-0001505    | 7    | -0.650850 | -1.646717 | 0.017799  | 0.315420  | 1.000      |
| 684 | GOBP-NEGATIVE.REGULATION.OF-IMMUNE.SYSTEM.PROCESS | GO-0002683    | 5    | -0.747473 | -1.654530 | 0.013932  | 0.305515  | 1.000      |
| 685 | GOBP-MULTICELLULAR.ORGANISMAL.HOMEOSTASIS         | GO-0048871    | 12   | -0.572448 | -1.669085 | 0.023529  | 0.281698  | 1.000      |

Continuation of Table S19

| NAME                                                  | ID            | SIZE | ES        | NES       | NOM.p.val | FDR.q.val | FWER.p.val |
|-------------------------------------------------------|---------------|------|-----------|-----------|-----------|-----------|------------|
| 686 GOBP-TISSUE-MIGRATION                             | GO-0090130    | 9    | -0.620679 | -1.675839 | 0.015576  | 0.276290  | 1.000      |
| 687 GOBP-SENSORY_PERCEPTION_OF_PAIN                   | GO-0019233    | 5    | -0.762718 | -1.684219 | 0.013997  | 0.267451  | 1.000      |
| 688 GOBP-REGULATION_OF_SMALL-MOLECULE-METABOLIC-PR... | GO-0062012    | 9    | -0.627242 | -1.685356 | 0.010370  | 0.273429  | 1.000      |
| 689 GOBP-SYNAPTIC-SIGNALING                           | GO-0099536    | 47   | -0.427485 | -1.689640 | 0.012870  | 0.272643  | 1.000      |
| 690 GOBP-SIGNAL-RELEASE                               | GO-0023061    | 14   | -0.543418 | -1.698342 | 0.012931  | 0.263249  | 1.000      |
| 691 GOBP-IONOTROPIC-GLUTAMATE-RECEPTOR-SIGNALING-P... | GO-0035235    | 9    | -0.632911 | -1.710785 | 0.017161  | 0.249509  | 0.998      |
| 692 GOBP-REGULATION-OF-SIGNALING-RECEPTOR-ACTIVITY    | GO-0010469    | 14   | -0.553057 | -1.724086 | 0.011869  | 0.231932  | 0.997      |
| 693 REACTOME-TRANSMISSION-ACROSS-CHEMICAL-SYNAPSES    | R-RNO-112315  | 23   | -0.503234 | -1.734796 | 0.005517  | 0.220369  | 0.996      |
| 694 REACTOME-CREB1-PHOSPHORYLATION_THROUGH-NMDA-RE... | R-RNO-442742  | 8    | -0.668566 | -1.735813 | 0.009119  | 0.226884  | 0.995      |
| 695 GOBP-METAL-ION-HOMEOSTASIS                        | GO-0055065    | 14   | -0.561354 | -1.742089 | 0.011445  | 0.223768  | 0.989      |
| 696 GOBP-REGULATION-OF-SYNAPTIC-PLASTICITY            | GO-0048167    | 21   | -0.515871 | -1.746472 | 0.016484  | 0.224581  | 0.988      |
| 697 GOBP-CELL-CELL-SIGNALING                          | GO-0007267    | 56   | -0.459364 | -1.765695 | 0.003886  | 0.200745  | 0.983      |
| 698 GOBP-RESPONSE-TO-HEAT                             | GO-0009408    | 7    | -0.721531 | -1.772382 | 0.004651  | 0.199109  | 0.979      |
| 699 GOBP-LONG-TERM-SYNAPTIC-POTENTIATION              | GO-0060291    | 12   | -0.617680 | -1.776981 | 0.005780  | 0.201518  | 0.976      |
| 700 GOBP-PROTEIN-LOCALIZATION-TO-CELL-PERIPHERY       | GO-1990778    | 12   | -0.607005 | -1.784797 | 0.004451  | 0.197299  | 0.968      |
| 701 REACTOME-SYNAPTIC-ADHESION-LIKE-MOLECULES         | R-RNO-884932  | 9    | -0.670886 | -1.792105 | 0.006107  | 0.194969  | 0.961      |
| 702 GOBP-DIVALENT-INORGANIC-CATION-HOMEOSTASIS        | GO-0072507    | 13   | -0.607158 | -1.815839 | 0.009777  | 0.167554  | 0.923      |
| 703 GOBP-CELLULAR-ION-HOMEOSTASIS                     | GO-0006873    | 14   | -0.593443 | -1.816342 | 0.011817  | 0.177216  | 0.921      |
| 704 REACTOME-NEUROTRANSMITTER-RECEPTORS-AND-POSTSY... | R-RNO-112314  | 22   | -0.524333 | -1.818207 | 0.001377  | 0.186140  | 0.917      |
| 705 REACTOME-RAS-ACTIVATION-UPON-CA2-INFLUX-THROUG... | R-HSA-442982  | 6    | -0.780488 | -1.823158 | 0.006483  | 0.191050  | 0.901      |
| 706 GOBP-RESPONSE-TO-ALCOHOL                          | GO-0097305    | 11   | -0.634361 | -1.825040 | 0.004405  | 0.203475  | 0.899      |
| 707 GOBP-REGULATION-OF-CYTOSOLIC-CALCIUM-ION-CONCE... | GO-0051480    | 13   | -0.607158 | -1.830605 | 0.005857  | 0.206569  | 0.883      |
| 708 REACTOME-LONG-TERM-POTENTIATION                   | R-HSA-9620244 | 10   | -0.667578 | -1.834206 | 0.007321  | 0.217874  | 0.876      |
| 709 GOBP-CELL-CELL-ADHESION                           | GO-0098609    | 14   | -0.618002 | -1.904023 | 0.004219  | 0.117604  | 0.624      |
| 710 GOBP-MORPHOGENESIS-OF-AN-EPITHELIUM               | GO-0002009    | 6    | -0.809941 | -1.907440 | 0.001605  | 0.126101  | 0.611      |
| 711 REACTOME-UNBLOCKING-OF-NMDA-RECEPTORS-GLUTAMAT... | R-RNO-438066  | 12   | -0.657895 | -1.949656 | 0.004431  | 0.091273  | 0.444      |
| 712 REACTOME-NEGATIVE-REGULATION-OF-NMDA-RECEPTOR-... | R-HSA-9617324 | 8    | -0.762500 | -1.955284 | 0.003063  | 0.097942  | 0.429      |
| 713 GOBP-ENDOTHELIAL-CELL-MIGRATION                   | GO-0043542    | 8    | -0.764257 | -1.963357 | 0.000000  | 0.104155  | 0.401      |
| 714 REACTOME-ASSEMBLY-AND-CELL-SURFACE-PRESENTATIO... | R-RNO-9609736 | 8    | -0.762500 | -1.964867 | 0.000000  | 0.123102  | 0.396      |
| 715 GOBP-TISSUE-MORPHOGENESIS                         | GO-0048729    | 7    | -0.806186 | -1.988465 | 0.001515  | 0.116012  | 0.326      |
| 716 GOBP-BLOOD-VESEL-ENDOTHELIAL-CELL-MIGRATION       | GO-0043534    | 8    | -0.764257 | -1.989083 | 0.000000  | 0.154295  | 0.325      |
| 717 GOBP-POSITIVE-REGULATION-OF-SYNAPTIC-TRANSMISSION | GO-0050806    | 15   | -0.666694 | -2.062194 | 0.000000  | 0.088657  | 0.138      |
| 718 REACTOME-ACTIVATION-OF-NMDA-RECEPTORS-AND-POST... | R-RNO-442755  | 16   | -0.671154 | -2.150442 | 0.000000  | 0.044580  | 0.035      |

End of Table

## 2 Supplementary Figures

### 2.1 Pearson Correlation Plots

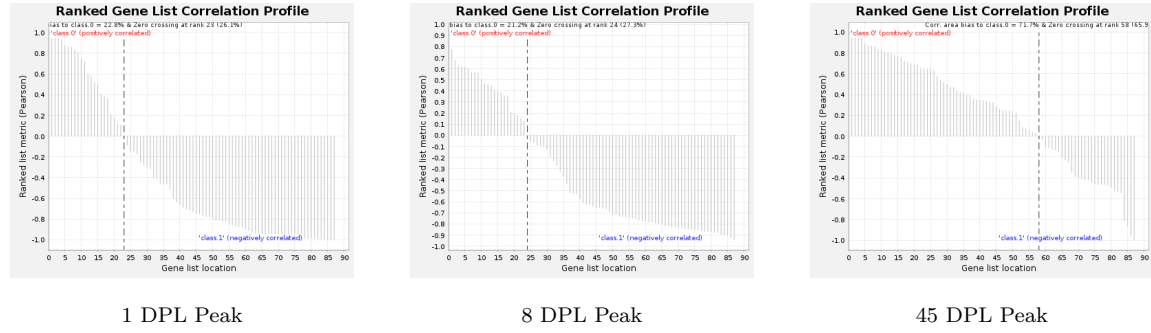

**Figure S1:** Bar plots of SC rostral segment 1, 8 and 45 DPL, Ranked Gene List Pearson Correlation Profile.

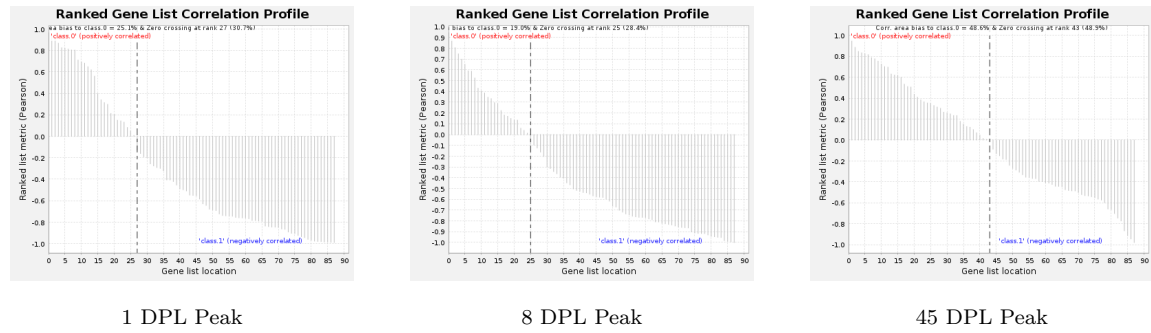

**Figure S2:** Bar plots of SC caudal segment 1, 8 and 45 DPL, Ranked Gene List Pearson Correlation Profile.

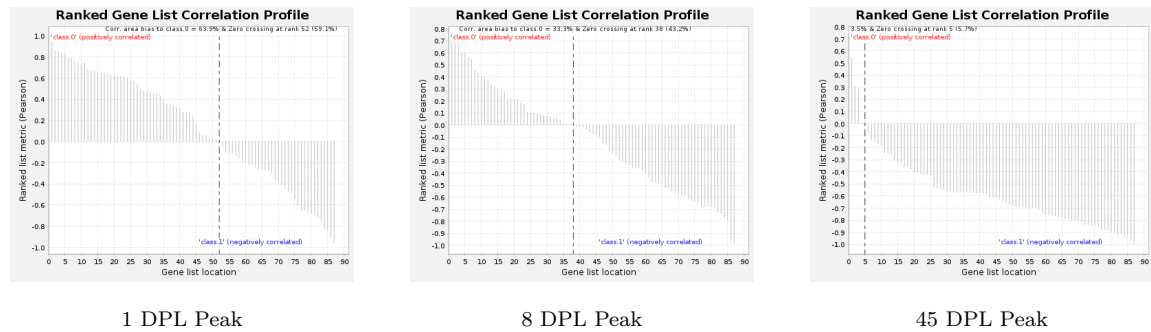

**Figure S3:** Bar plots of SC cervical segment 1, 8 and 45 DPL, Ranked Gene List Pearson Correlation Profile.

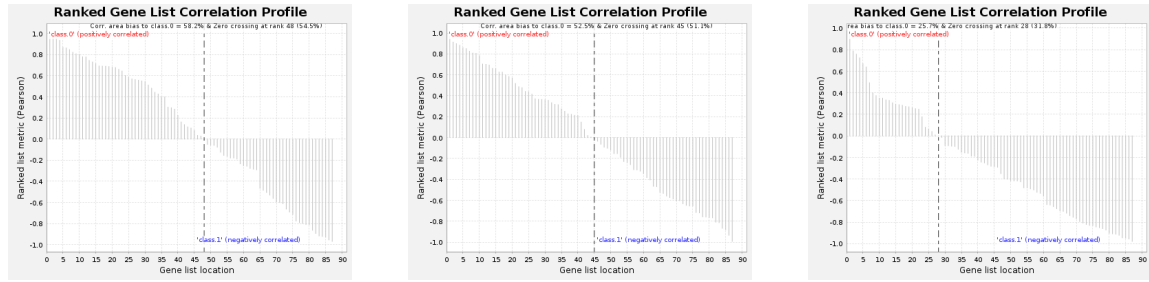

1 DPL Peak

8 DPL Peak

45 DPL Peak

**Figure S4:** Bar plots of CTX-M 1, 8 and 45 DPL, Ranked Gene List Pearson Correlation Profile.

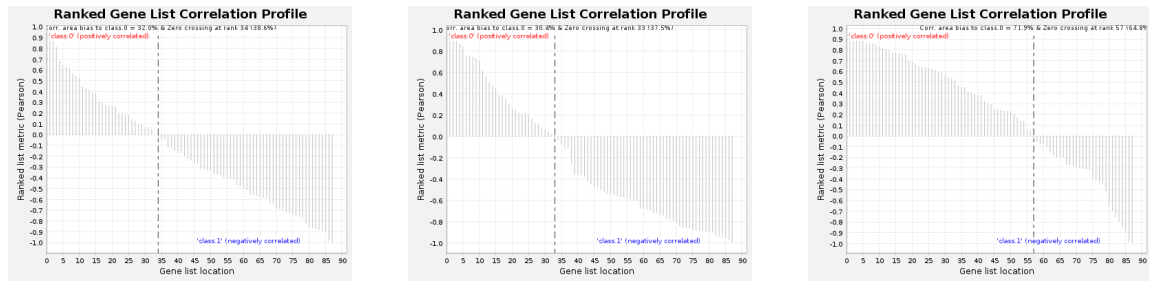

1 DPL Peak

8 DPL Peak

45 DPL Peak

**Figure S5:** Bar plots of BG 1, 8 and 45 DPL, Ranked Gene List Pearson Correlation Profile.

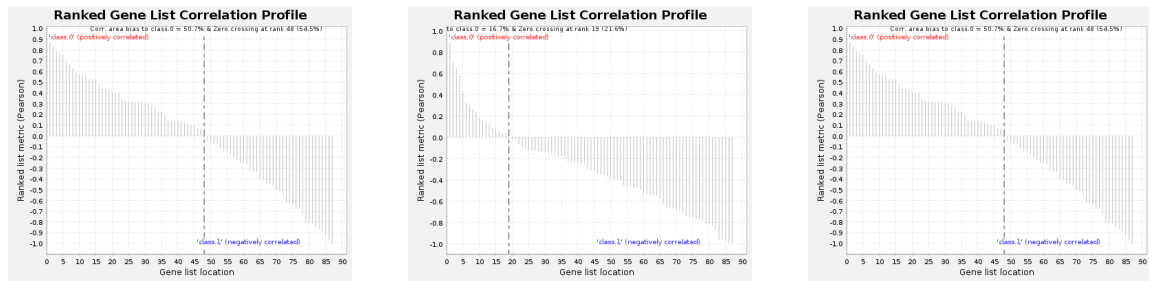

1 DPL Peak

8 DPL Peak

45 DPL Peak

**Figure S6:** Bar plots of CB 1, 8 and 45 DPL, Ranked Gene List Pearson Correlation Profile.

## 2.2 NES vs Significance Plots

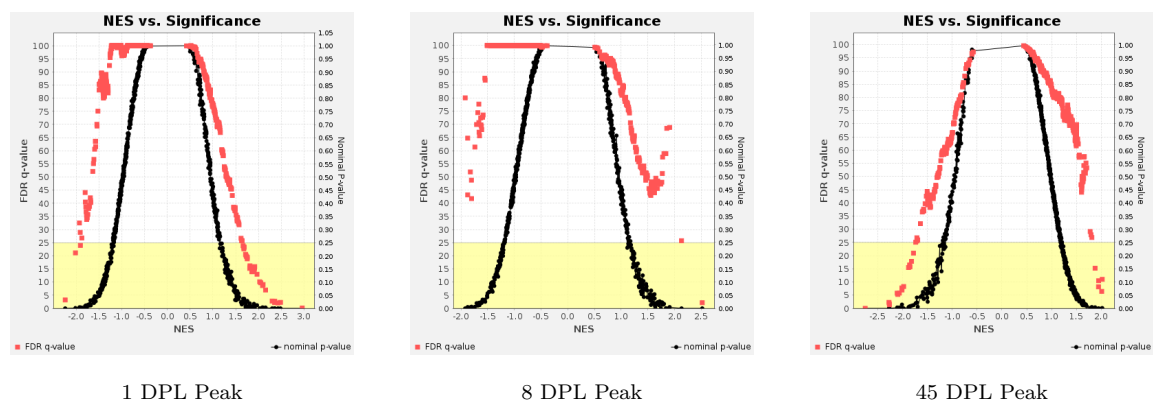

**Figure S7:** Plots of the distribution of SC rostral segment 1, 8 and 45 DPL, NES values. Significant pathways,  $FDR \leq 0.25$ , are highlighted in yellow.

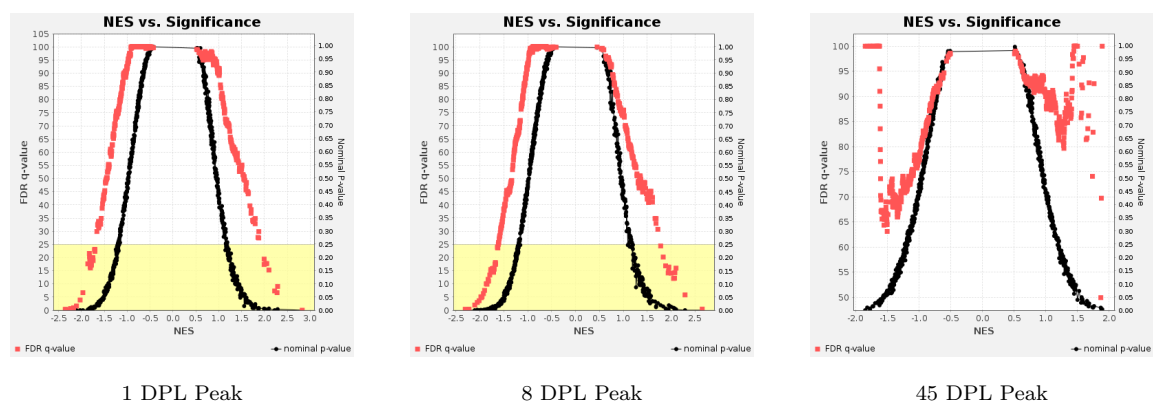

**Figure S8:** Plots of the distributions of SC caudal section's 1, 8 and 45 DPL, NES values. Significant pathways,  $FDR \leq 0.25$ , are highlighted in yellow.



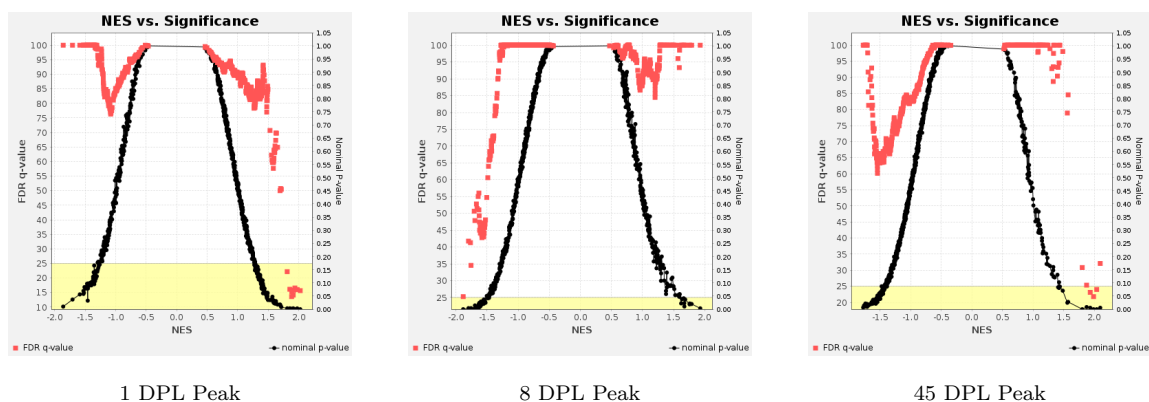

**Figure S9:** Plots of the distributions of SC cervical section's 1, 8 and 45 DPL, NES values. Significant pathways,  $FDR \leq 0.25$ , are highlighted in yellow.

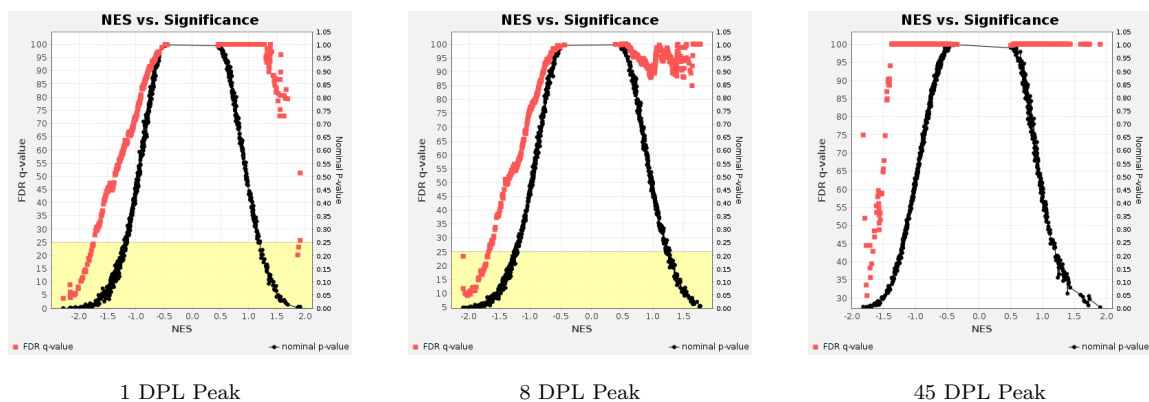

**Figure S10:** Plots of the distributions of CTX-M 1, 8 and 45 DPL, NES values. Significant pathways,  $FDR \leq 0.25$ , are highlighted in yellow.

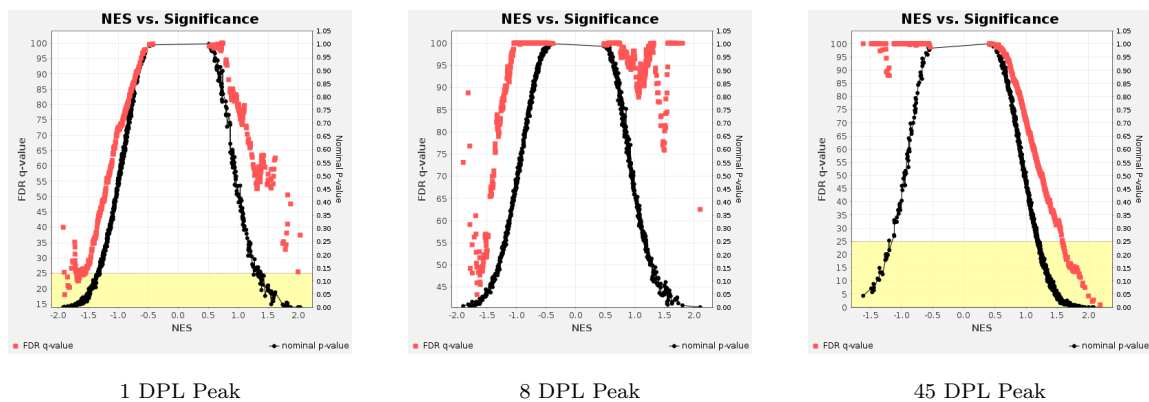

**Figure S11:** Plots of the distributions of BG 1, 8 and 45 DPL, NES values. Significant pathways,  $FDR \leq 0.25$ , are highlighted in yellow.

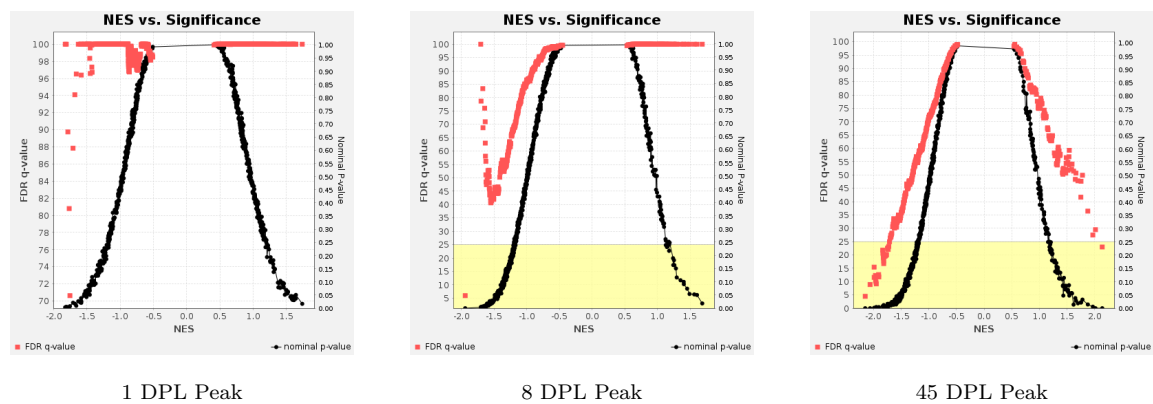

**Figure S12:** Plots of the distributions of CB 1, 8 and 45 DPL, NES values. Significant pathways,  $FDR \leq 0.25$ , are highlighted in yellow.

## 2.3 Leading Edge Analysis

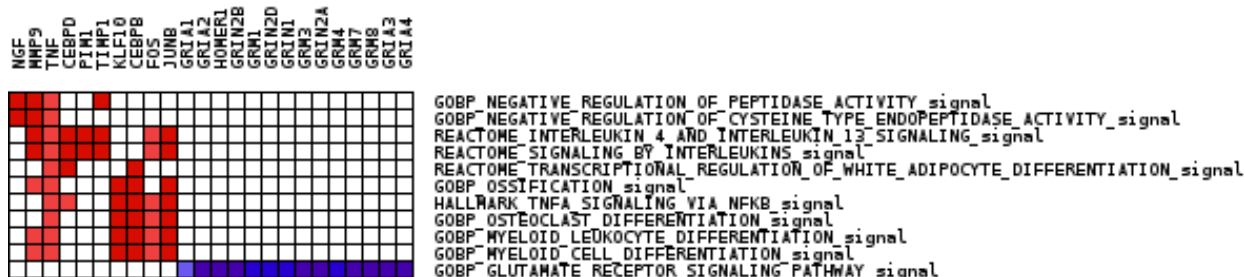

Figure S13: SC rostral 1 DPL Leading Edge Analysis results

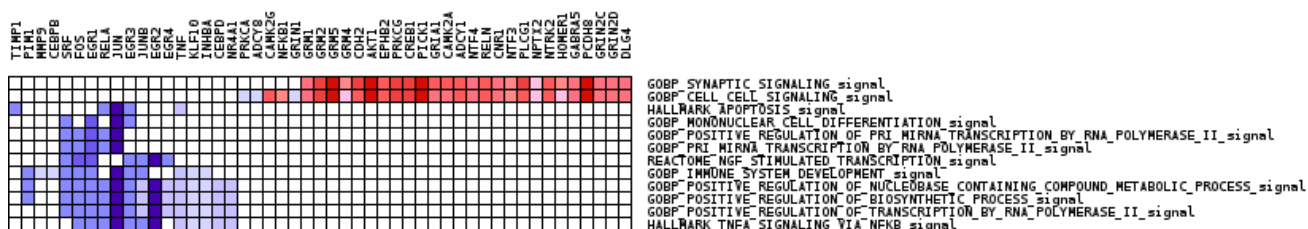

Figure S14: SC rostral 45 DPL Leading Edge Analysis results

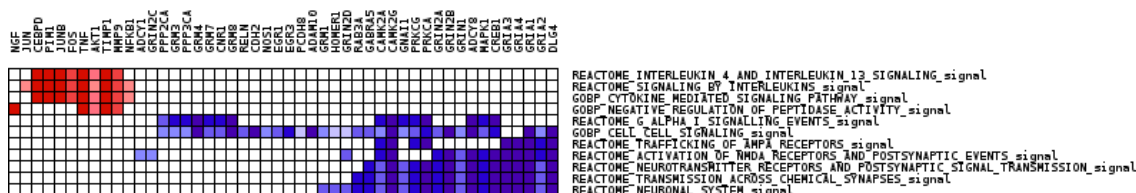

Figure S15: SC caudal 1 DPL Leading Edge Analysis results

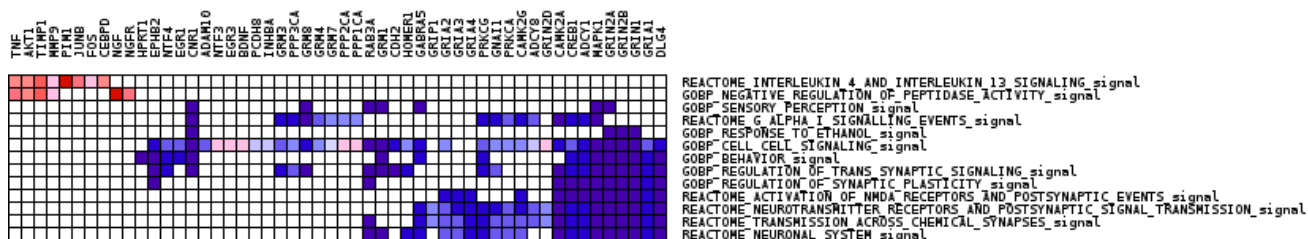

Figure S16: SC caudal 8 DPL Leading Edge Analysis results



2.4   Deregulated Pathways EN Plots and Heatmaps

2.4.1   SC rostral 1 DPL Peak Pathways

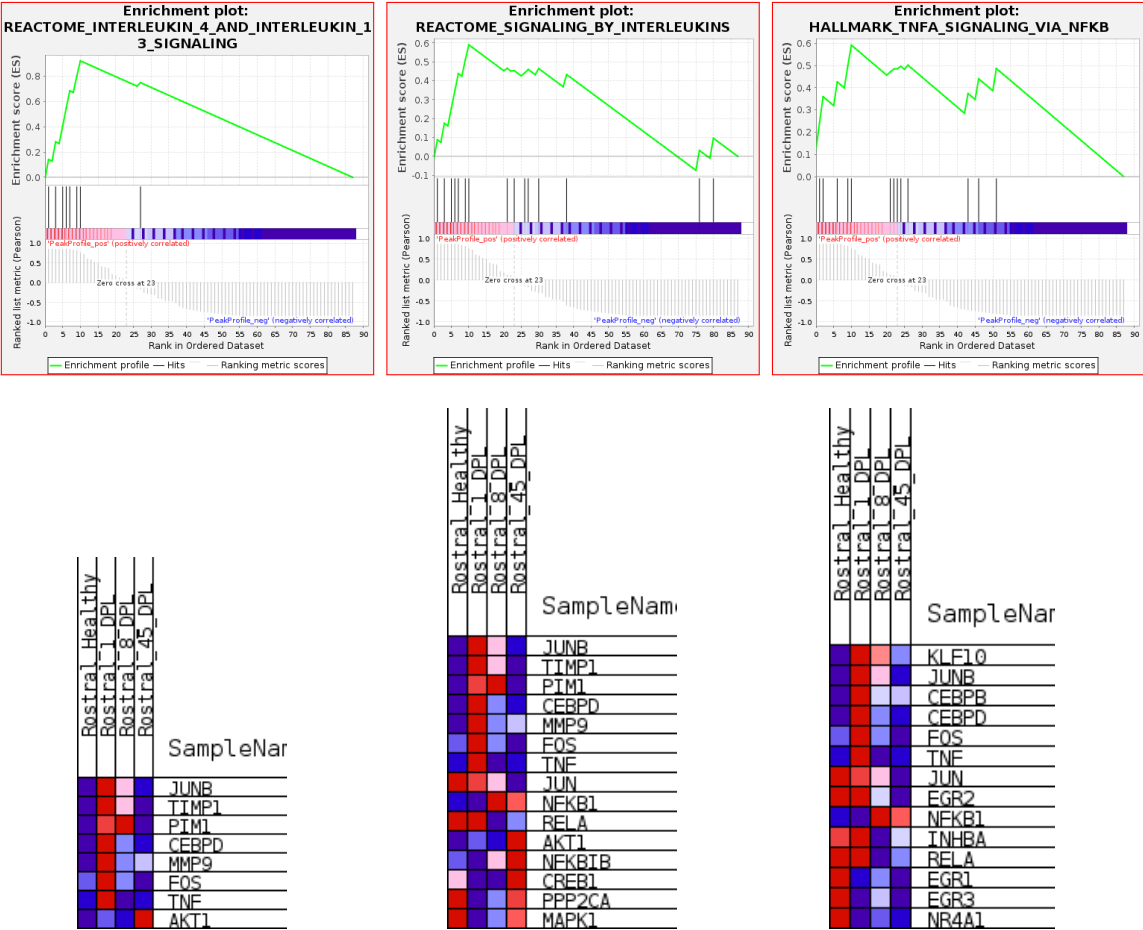

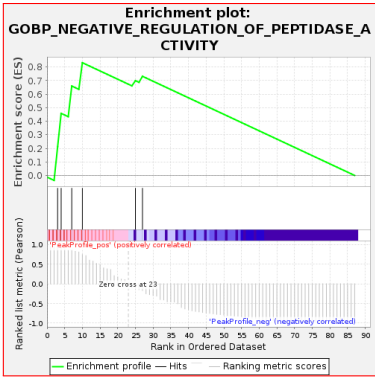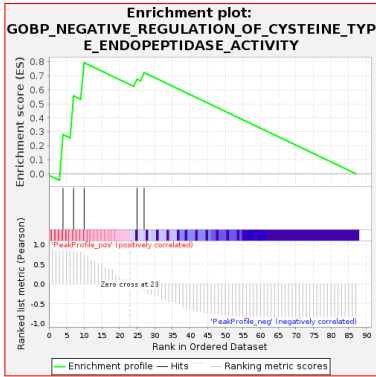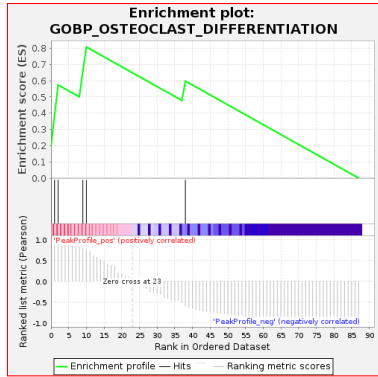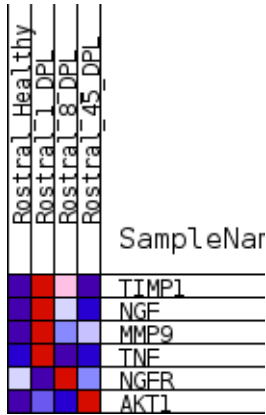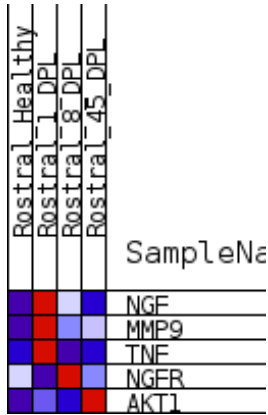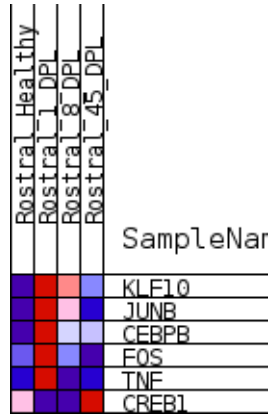

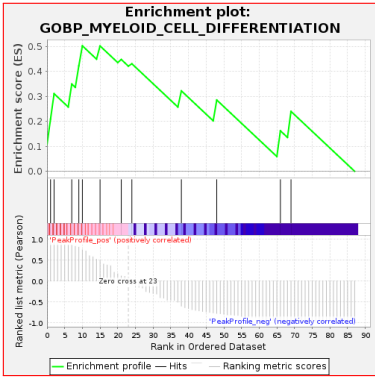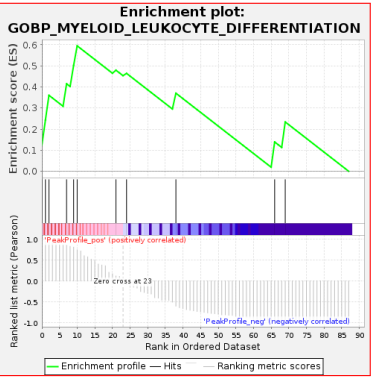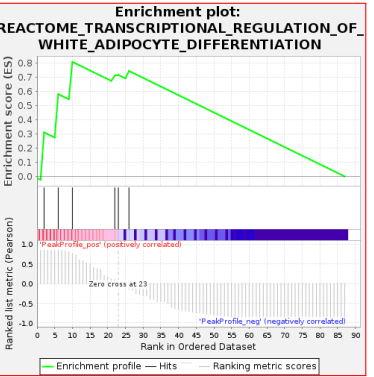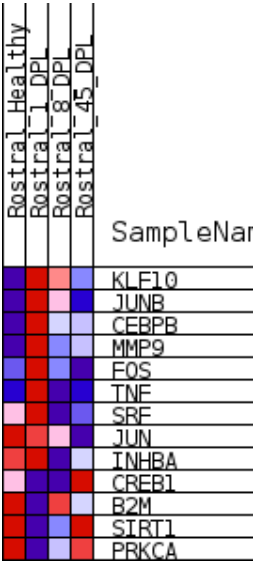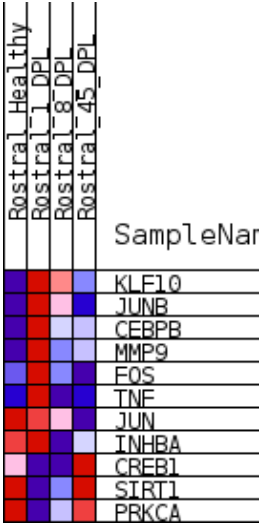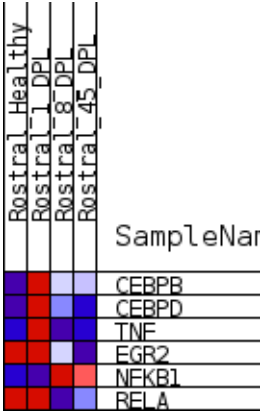

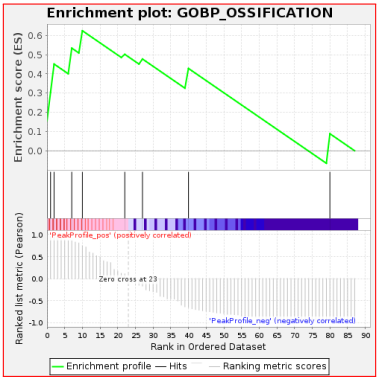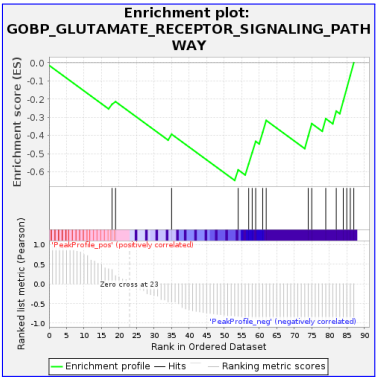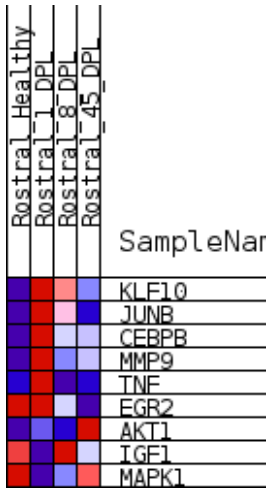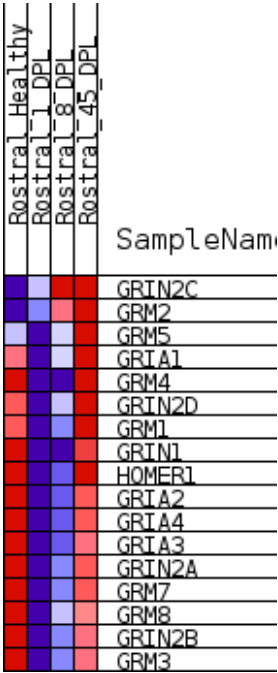

**Figure S21:** Enrichment plots (upper) and corresponding gene set Heatmaps (lower) of SC rostral 1 DPL peak deregulated pathways ( $FDR \leq 0.1$ ). Up-regulated pathways are framed in red, down-regulated in blue.



2.4.2 SC rostral 8 DPL Peak Pathways

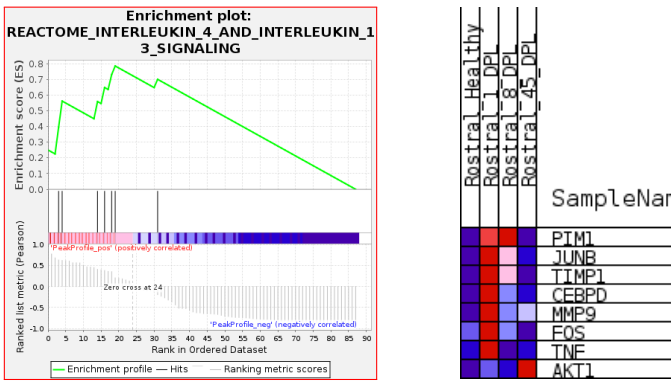

**Figure S22:** Enrichment plots (upper) and corresponding gene set Heatmaps (lower) of SC rostral 8 DPL peak deregulated pathways ( $FDR \leq 0.1$ ). Up-regulated pathways are framed in red, down-regulated in blue.

### 2.4.3 SC rostral 45 DPL Peak Pathways

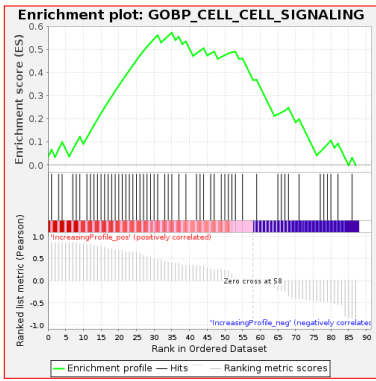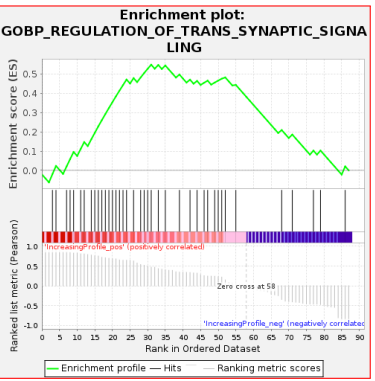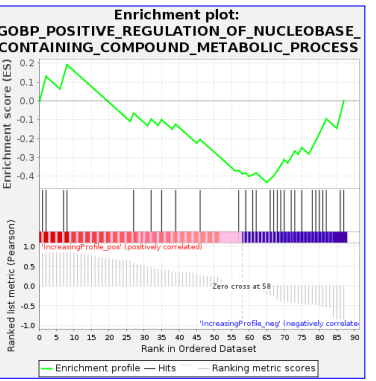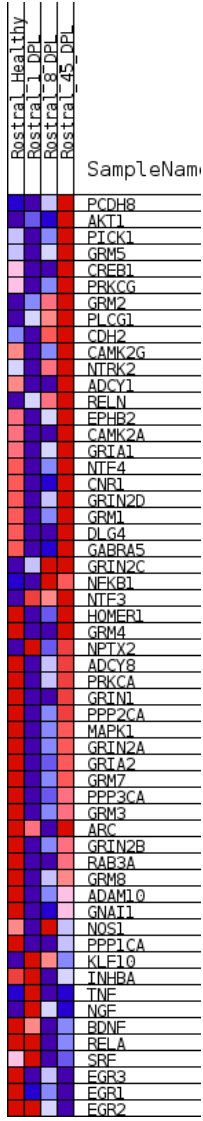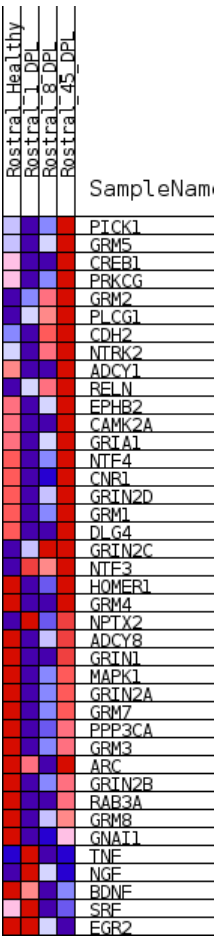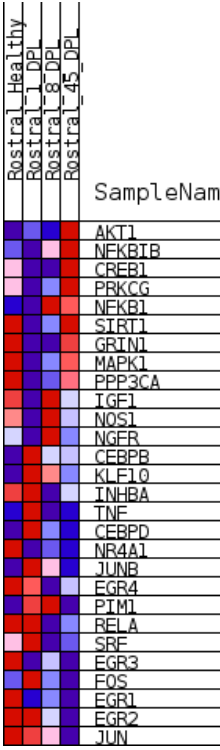



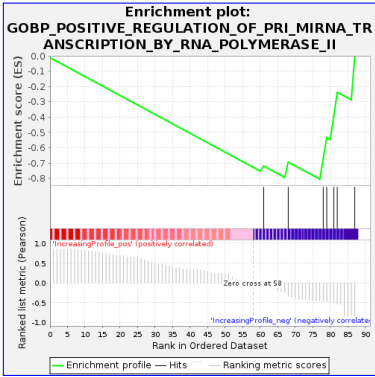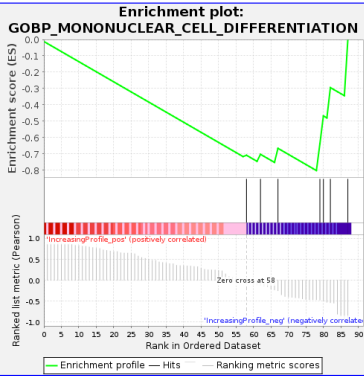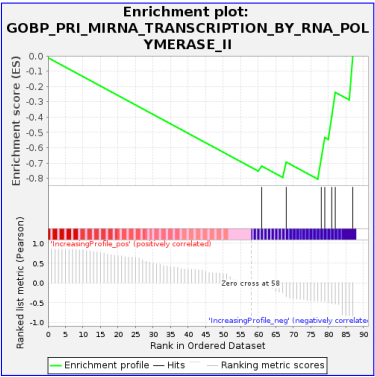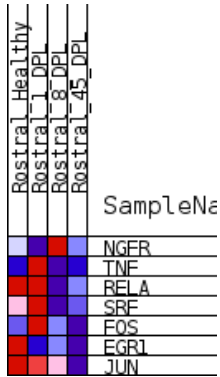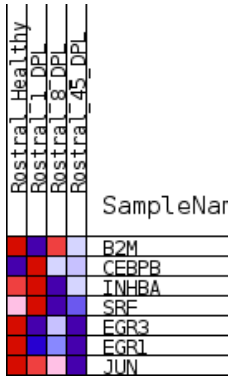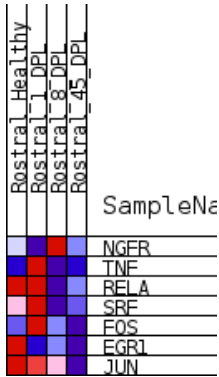

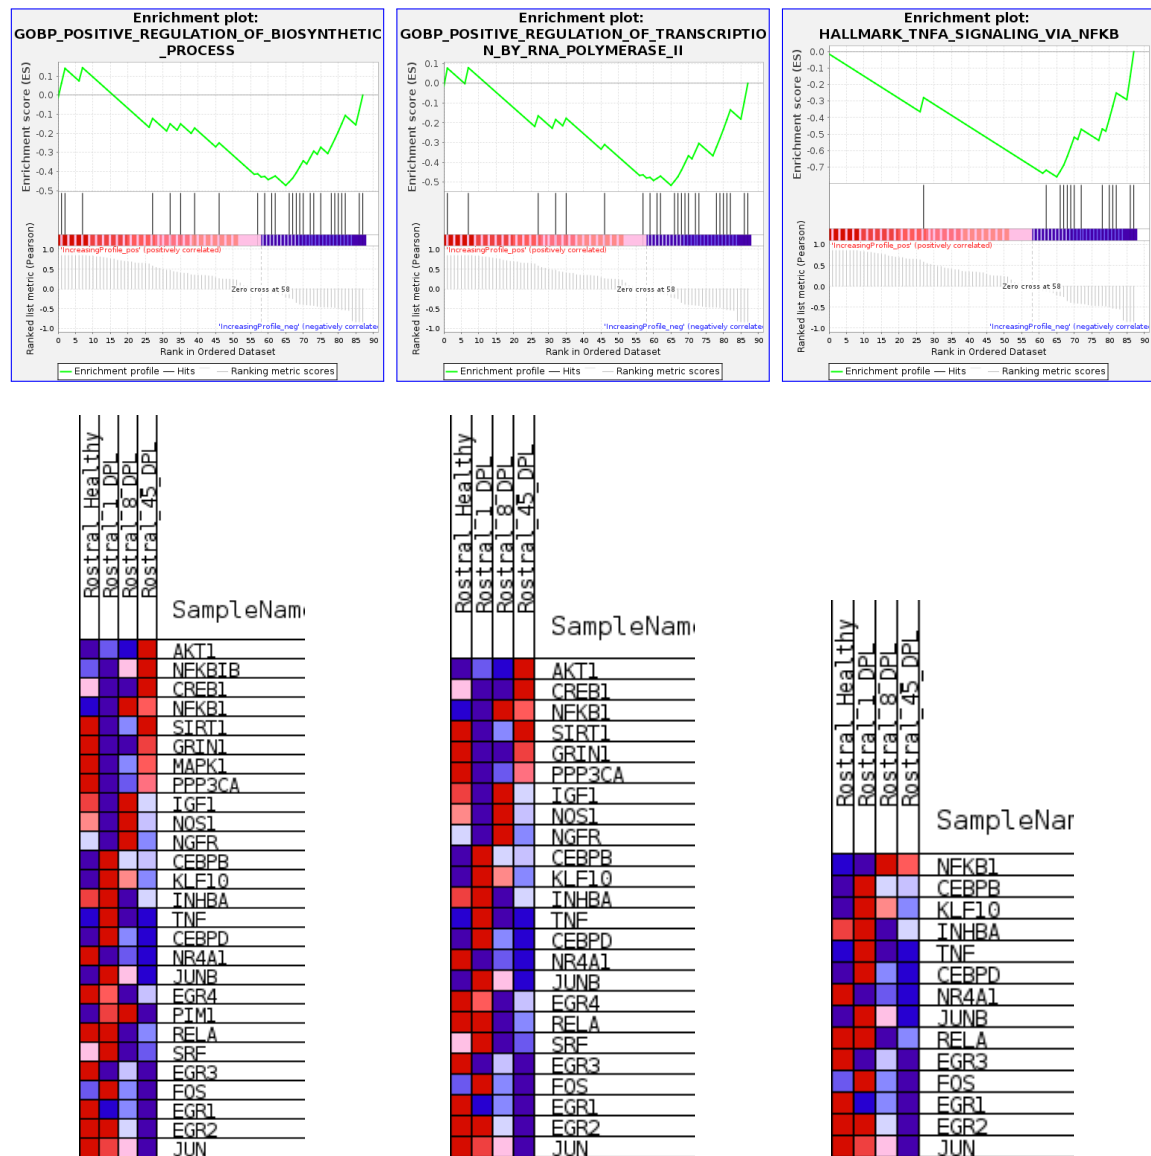

**Figure S23:** Enrichment plots (upper) and corresponding gene set Heatmaps (lower) of SC rostral 45 DPL peak deregulated pathways ( $FDR \leq 0.1$ ). Up-regulated pathways are framed in red, down-regulated in blue.

2.4.4 SC caudal 1 DPL Peak Pathways

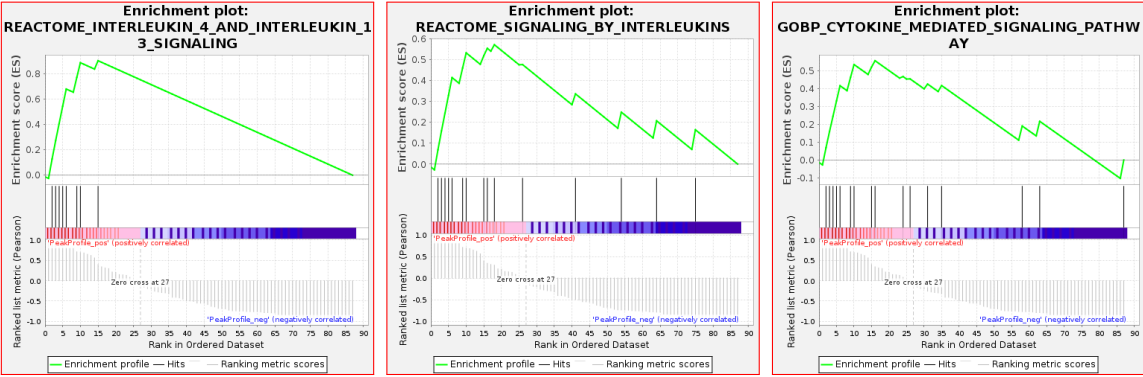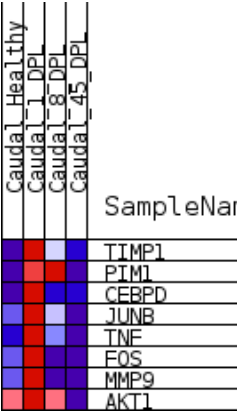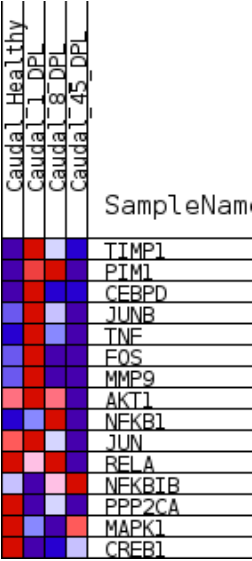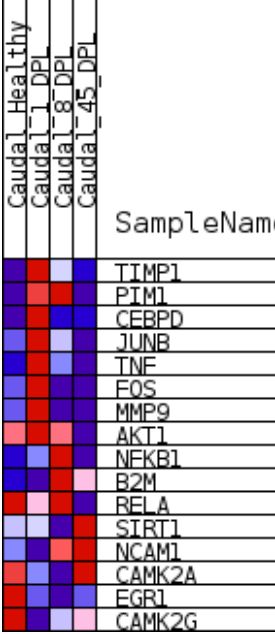

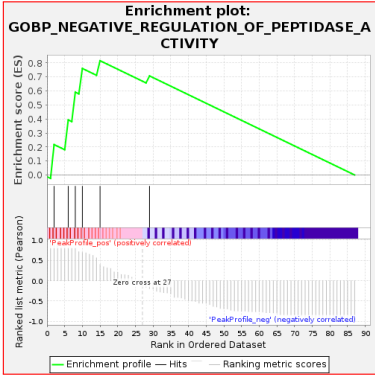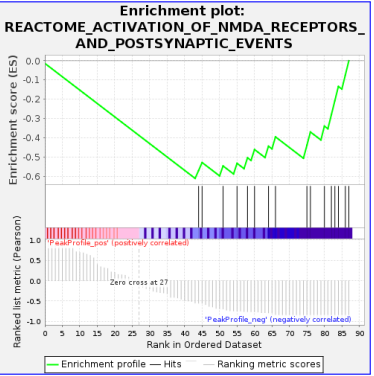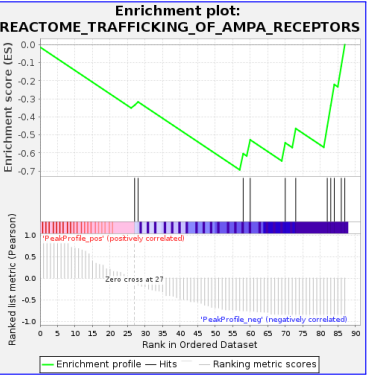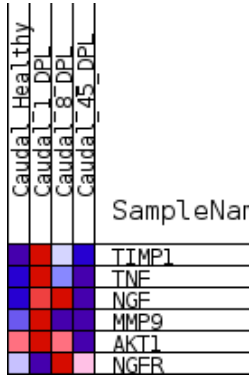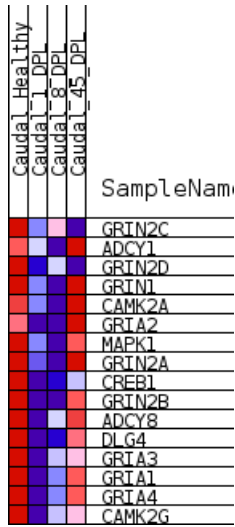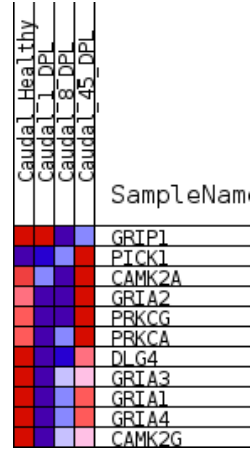



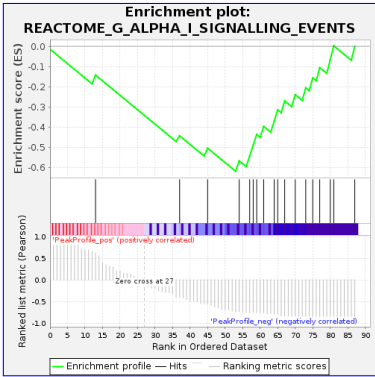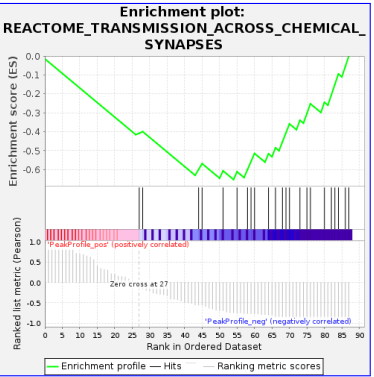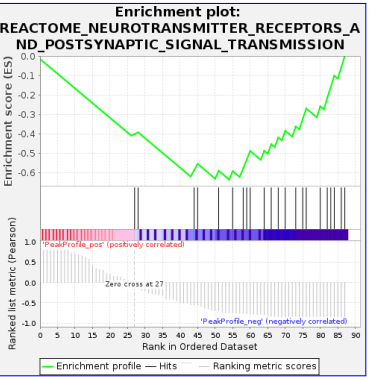

| Caudal_Healthy | Caudal_1_DPL | Caudal_8_DPL | Caudal_45_DPL | SampleName |
|----------------|--------------|--------------|---------------|------------|
|                |              |              |               | GRM2       |
|                |              |              |               | PPP1CA     |
|                |              |              |               | ADCY1      |
|                |              |              |               | PPP2CA     |
|                |              |              |               | GRM3       |
|                |              |              |               | CAMK2A     |
|                |              |              |               | GNAI1      |
|                |              |              |               | PPP3CA     |
|                |              |              |               | MAPK1      |
|                |              |              |               | CNR1       |
|                |              |              |               | GRM7       |
|                |              |              |               | PRKCG      |
|                |              |              |               | PRKCA      |
|                |              |              |               | CREB1      |
|                |              |              |               | GRM4       |
|                |              |              |               | ADCY8      |
|                |              |              |               | GRM8       |
|                |              |              |               | CAMK2G     |

| Caudal_Healthy | Caudal_1_DPL | Caudal_8_DPL | Caudal_45_DPL | SampleName |
|----------------|--------------|--------------|---------------|------------|
|                |              |              |               | GRIP1      |
|                |              |              |               | PICK1      |
|                |              |              |               | GRIN2C     |
|                |              |              |               | ADCY1      |
|                |              |              |               | GRIN2D     |
|                |              |              |               | GRIN1      |
|                |              |              |               | CAMK2A     |
|                |              |              |               | GNAI1      |
|                |              |              |               | GRIA2      |
|                |              |              |               | MAPK1      |
|                |              |              |               | GRIN2A     |
|                |              |              |               | GABRA5     |
|                |              |              |               | RAB3A      |
|                |              |              |               | PRKCG      |
|                |              |              |               | PRKCA      |
|                |              |              |               | CREB1      |
|                |              |              |               | GRIN2B     |
|                |              |              |               | ADCY8      |
|                |              |              |               | DLG4       |
|                |              |              |               | GRIA3      |
|                |              |              |               | GRIA1      |
|                |              |              |               | GRIA4      |
|                |              |              |               | CAMK2G     |

| Caudal_Healthy | Caudal_1_DPL | Caudal_8_DPL | Caudal_45_DPL | SampleName |
|----------------|--------------|--------------|---------------|------------|
|                |              |              |               | GRIP1      |
|                |              |              |               | PICK1      |
|                |              |              |               | GRIN2C     |
|                |              |              |               | ADCY1      |
|                |              |              |               | GRIN2D     |
|                |              |              |               | GRIN1      |
|                |              |              |               | CAMK2A     |
|                |              |              |               | GNAI1      |
|                |              |              |               | GRIA2      |
|                |              |              |               | MAPK1      |
|                |              |              |               | GRIN2A     |
|                |              |              |               | GABRA5     |
|                |              |              |               | PRKCG      |
|                |              |              |               | PRKCA      |
|                |              |              |               | CREB1      |
|                |              |              |               | GRIN2B     |
|                |              |              |               | ADCY8      |
|                |              |              |               | DLG4       |
|                |              |              |               | GRIA3      |
|                |              |              |               | GRIA1      |
|                |              |              |               | GRIA4      |
|                |              |              |               | CAMK2G     |

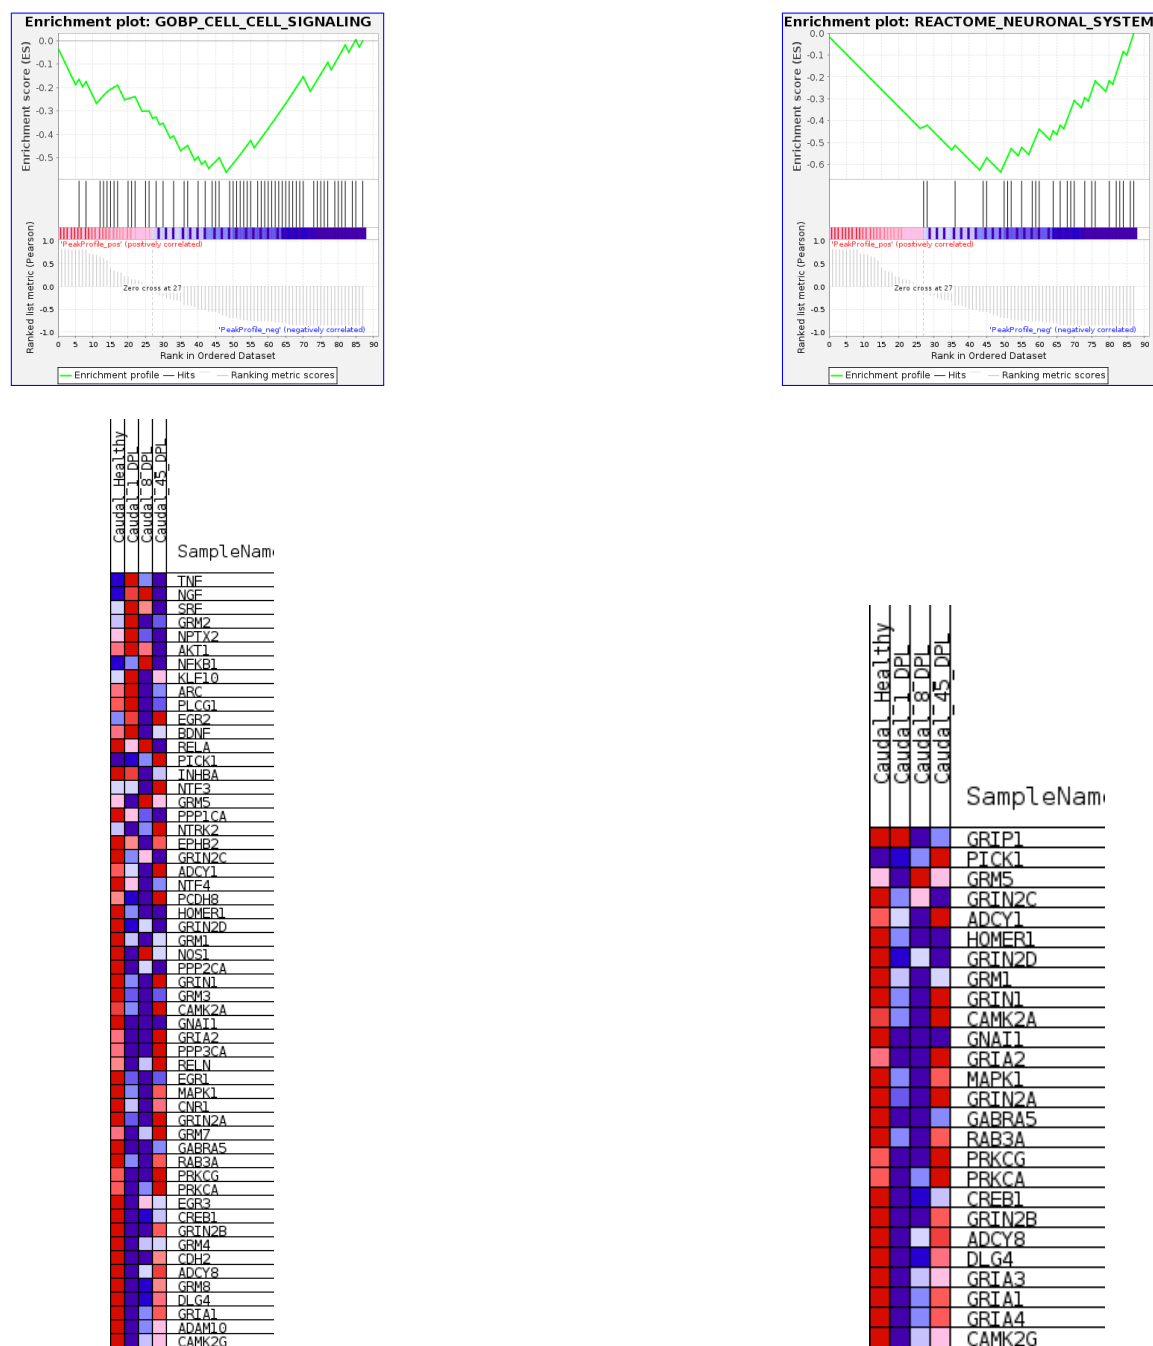

**Figure S24:** Enrichment plots (upper) and corresponding gene set Heatmaps (lower) of SC caudal 1 DPL peak deregulated pathways ( $FDR \leq 0.1$ ). Up-regulated pathways are framed in red, down-regulated in blue.

2.4.5 SC caudal 8 DPL Peak Pathways

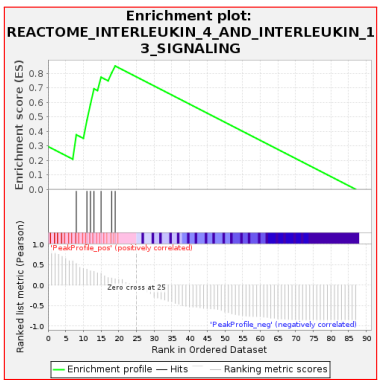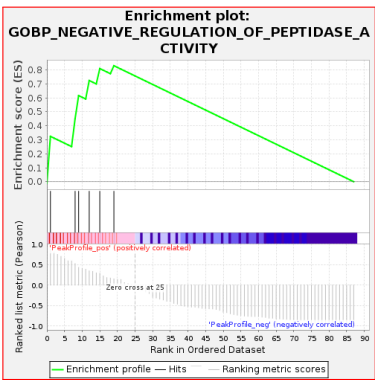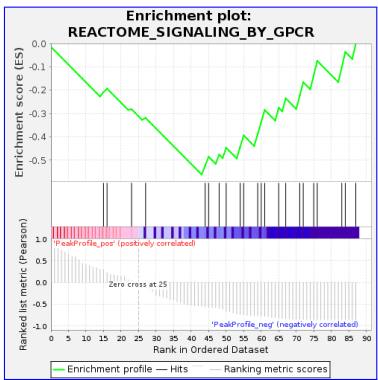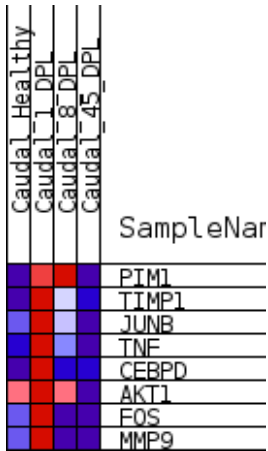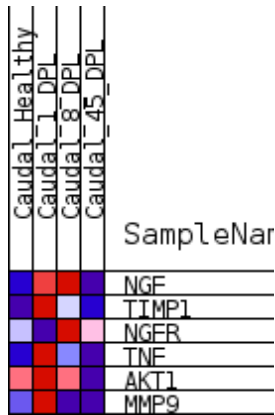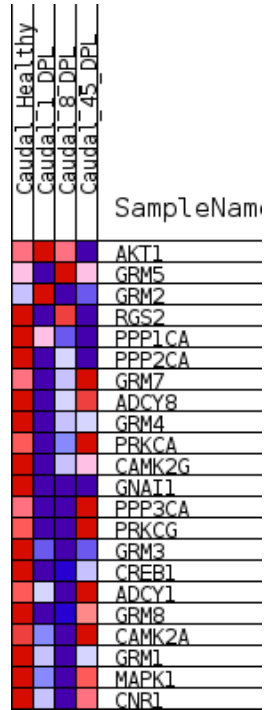

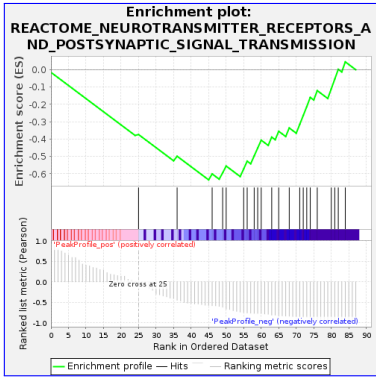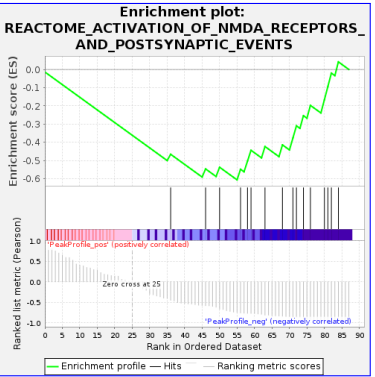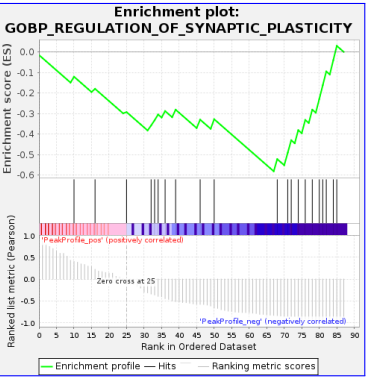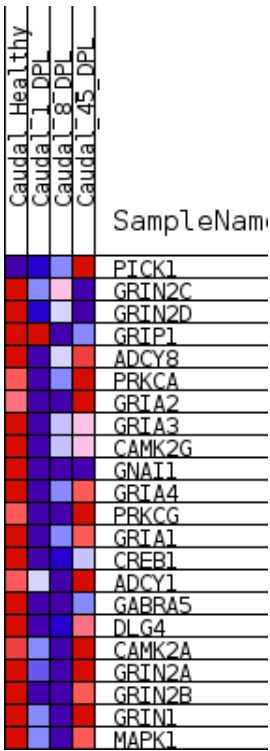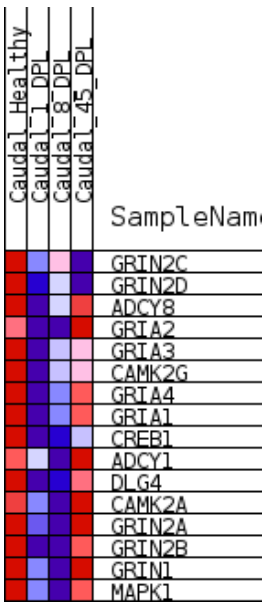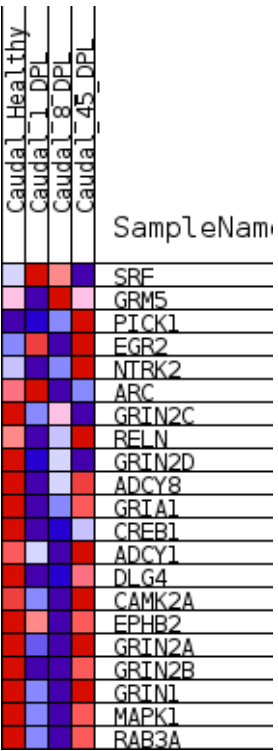

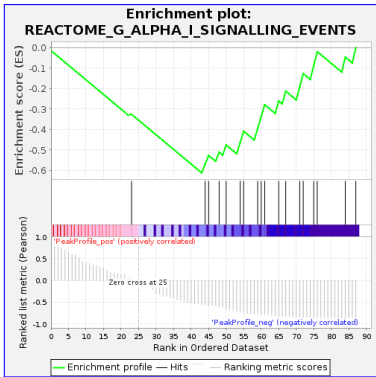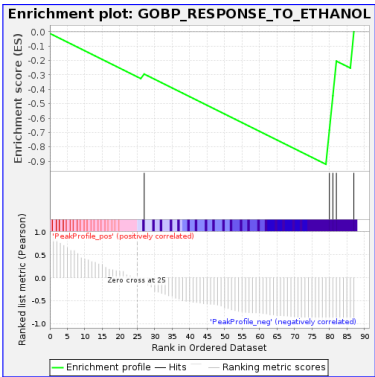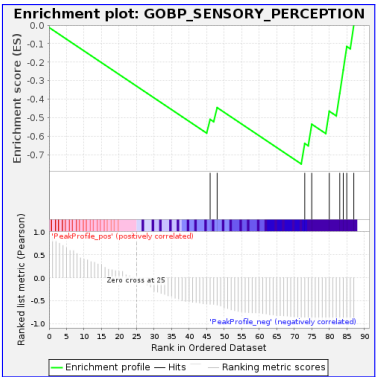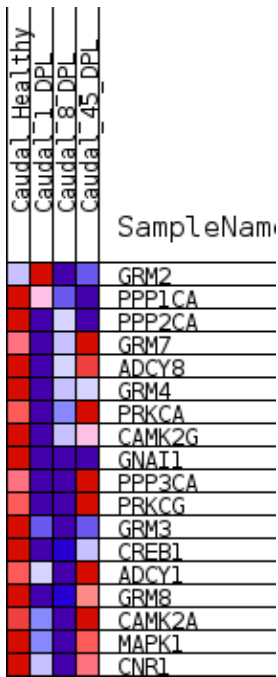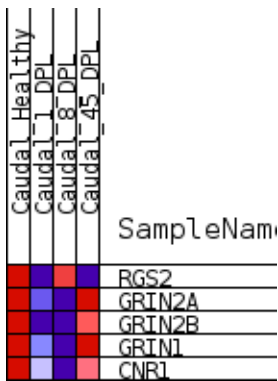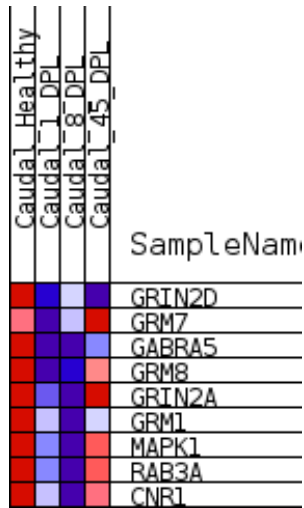

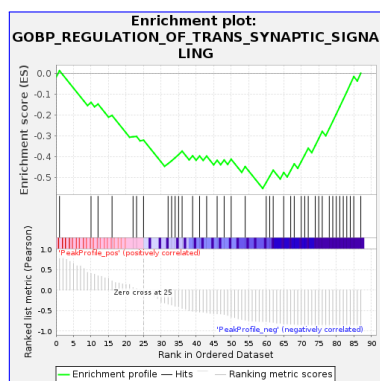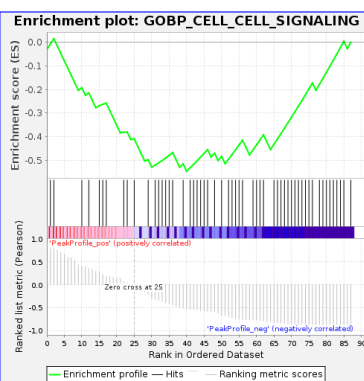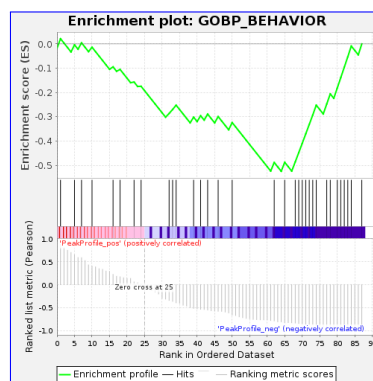

| Caudal_Healthy | Caudal_1_DPL | Caudal_8_DPL | Caudal_45_DPL | SampleName |
|----------------|--------------|--------------|---------------|------------|
|                |              |              |               | NGF        |
|                |              |              |               | SRF        |
|                |              |              |               | TNF        |
|                |              |              |               | GRM5       |
|                |              |              |               | NPTX2      |
|                |              |              |               | GRM2       |
|                |              |              |               | PICK1      |
|                |              |              |               | EGR2       |
|                |              |              |               | NTRK2      |
|                |              |              |               | ARC        |
|                |              |              |               | PLCG1      |
|                |              |              |               | GRIN2C     |
|                |              |              |               | RELN       |
|                |              |              |               | NTF3       |
|                |              |              |               | BDNF       |
|                |              |              |               | GRIN2D     |
|                |              |              |               | GRM7       |
|                |              |              |               | ADCY8      |
|                |              |              |               | GRM4       |
|                |              |              |               | GNAI1      |
|                |              |              |               | PPP3CA     |
|                |              |              |               | HOMER1     |
|                |              |              |               | PRKCG      |
|                |              |              |               | GRM3       |
|                |              |              |               | GRIA1      |
|                |              |              |               | NTF4       |
|                |              |              |               | CREB1      |
|                |              |              |               | ADCY1      |
|                |              |              |               | DLG4       |
|                |              |              |               | GRM8       |
|                |              |              |               | CAMK2A     |
|                |              |              |               | EPHB2      |
|                |              |              |               | CDH2       |
|                |              |              |               | GRIN2A     |
|                |              |              |               | GRIN2B     |
|                |              |              |               | GRIN1      |
|                |              |              |               | GRM1       |
|                |              |              |               | MAPK1      |
|                |              |              |               | RAB3A      |
|                |              |              |               | CNR1       |

| Caudal_Healthy | Caudal_1_DPL | Caudal_8_DPL | Caudal_45_DPL | SampleName |
|----------------|--------------|--------------|---------------|------------|
|                |              |              |               | NGF        |
|                |              |              |               | NFKB1      |
|                |              |              |               | SRF        |
|                |              |              |               | TNF        |
|                |              |              |               | AKT1       |
|                |              |              |               | GRM5       |
|                |              |              |               | RELA       |
|                |              |              |               | NPTX2      |
|                |              |              |               | GRM2       |
|                |              |              |               | PICK1      |
|                |              |              |               | NOS1       |
|                |              |              |               | KLF10      |
|                |              |              |               | EGR2       |
|                |              |              |               | NTRK2      |
|                |              |              |               | ARC        |
|                |              |              |               | PLCG1      |
|                |              |              |               | GRIN2C     |
|                |              |              |               | RELN       |
|                |              |              |               | NTF3       |
|                |              |              |               | EGR3       |
|                |              |              |               | BDNF       |
|                |              |              |               | PPP1CA     |
|                |              |              |               | PPP2CA     |
|                |              |              |               | GRIN2D     |
|                |              |              |               | GRM7       |
|                |              |              |               | ADCY8      |
|                |              |              |               | INHBA      |
|                |              |              |               | PCDH8      |
|                |              |              |               | GRM4       |
|                |              |              |               | PRKCA      |
|                |              |              |               | GRIA2      |
|                |              |              |               | CAMK2G     |
|                |              |              |               | GNAI1      |
|                |              |              |               | PPP3CA     |
|                |              |              |               | HOMER1     |
|                |              |              |               | PRKCG      |
|                |              |              |               | ADAM10     |
|                |              |              |               | GRM3       |
|                |              |              |               | GRIA1      |
|                |              |              |               | EGR1       |
|                |              |              |               | NTF4       |
|                |              |              |               | CREB1      |
|                |              |              |               | ADCY1      |
|                |              |              |               | GABRA5     |
|                |              |              |               | DLG4       |
|                |              |              |               | GRM8       |
|                |              |              |               | CAMK2A     |
|                |              |              |               | EPHB2      |
|                |              |              |               | CDH2       |
|                |              |              |               | GRIN2A     |
|                |              |              |               | GRIN2B     |
|                |              |              |               | GRIN1      |
|                |              |              |               | GRM1       |
|                |              |              |               | MAPK1      |
|                |              |              |               | RAB3A      |
|                |              |              |               | CNR1       |

| Caudal_Healthy | Caudal_1_DPL | Caudal_8_DPL | Caudal_45_DPL | SampleName |
|----------------|--------------|--------------|---------------|------------|
|                |              |              |               | NGF        |
|                |              |              |               | B2M        |
|                |              |              |               | CEBPB      |
|                |              |              |               | SRF        |
|                |              |              |               | GRM5       |
|                |              |              |               | FOS        |
|                |              |              |               | NPTX2      |
|                |              |              |               | JUN        |
|                |              |              |               | EGR2       |
|                |              |              |               | NTRK2      |
|                |              |              |               | ARC        |
|                |              |              |               | RELN       |
|                |              |              |               | NTF3       |
|                |              |              |               | BDNF       |
|                |              |              |               | GRIN2D     |
|                |              |              |               | ADCY8      |
|                |              |              |               | HOMER1     |
|                |              |              |               | PRKCG      |
|                |              |              |               | GRIA1      |
|                |              |              |               | EGR1       |
|                |              |              |               | NTF4       |
|                |              |              |               | CREB1      |
|                |              |              |               | ADCY1      |
|                |              |              |               | GABRA5     |
|                |              |              |               | DLG4       |
|                |              |              |               | HPRT1      |
|                |              |              |               | EPHB2      |
|                |              |              |               | GRIN2A     |
|                |              |              |               | GRIN2B     |
|                |              |              |               | GRIN1      |
|                |              |              |               | GRM1       |
|                |              |              |               | MAPK1      |
|                |              |              |               | CNR1       |

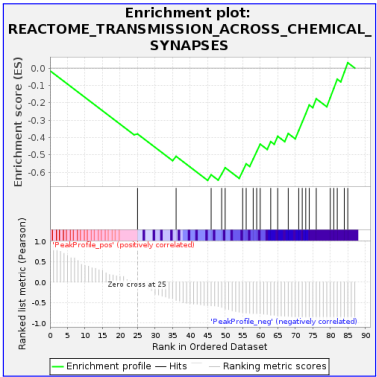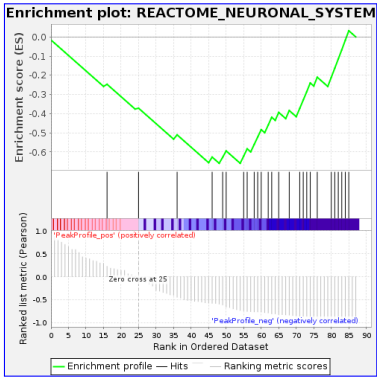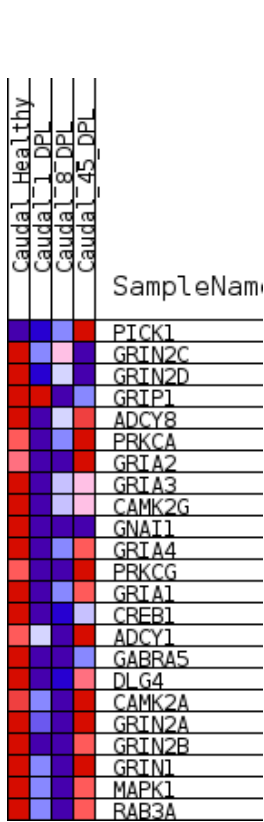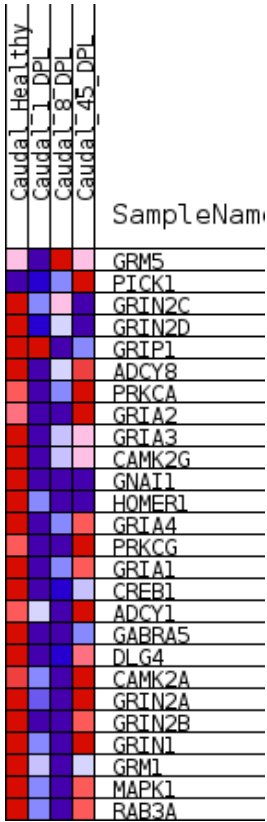

**Figure S25:** Enrichment plots (upper) and corresponding gene set Heatmaps (lower) of SC caudal 8 DPL peak deregulated pathways ( $FDR \leq 0.1$ ). Up-regulated pathways are framed in red, down-regulated in blue.

2.4.6 CTX-M 1 DPL Peak Pathways

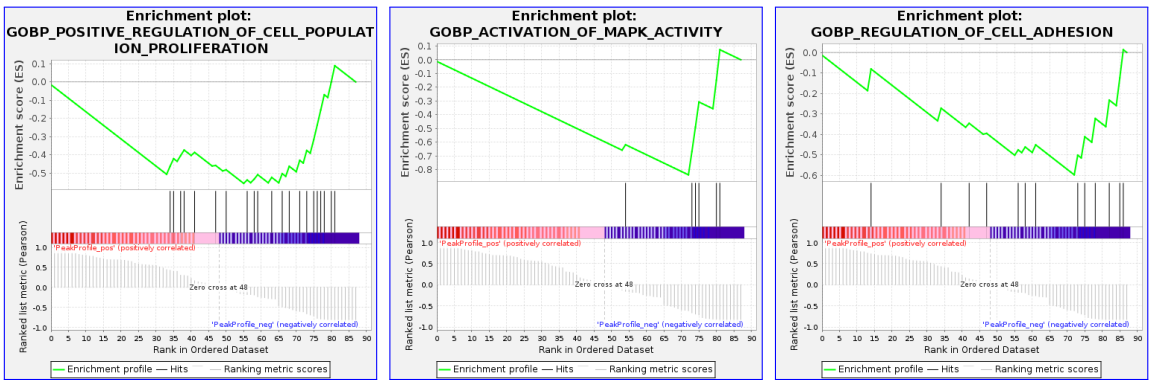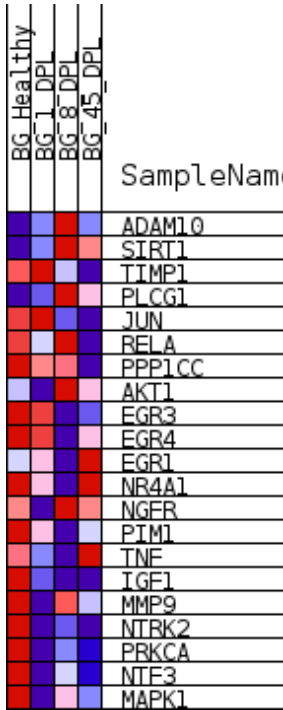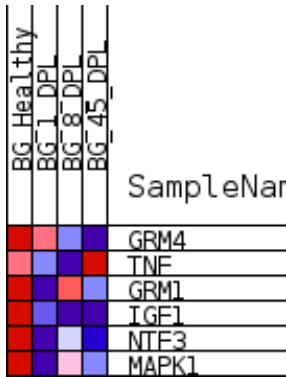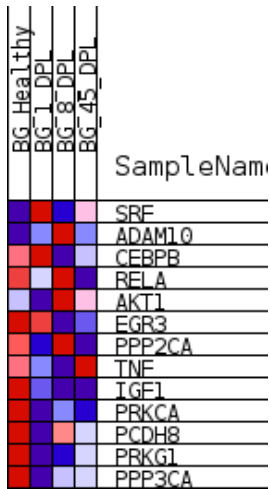



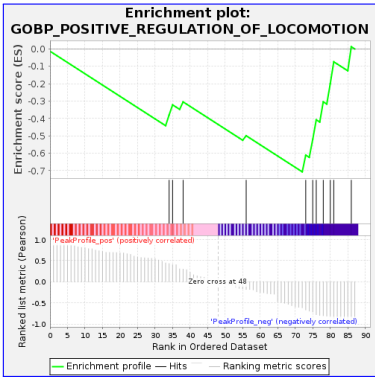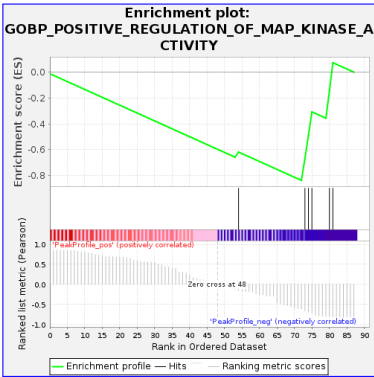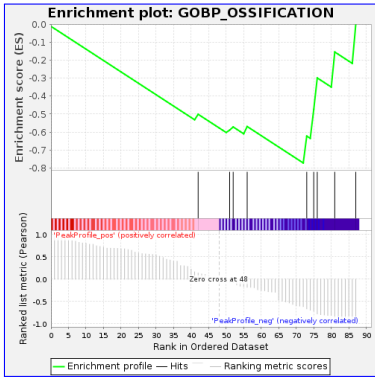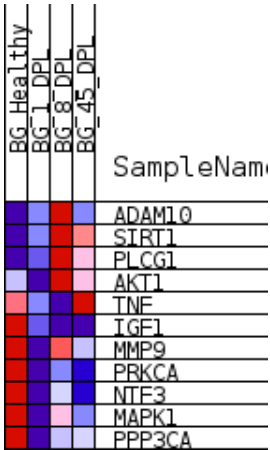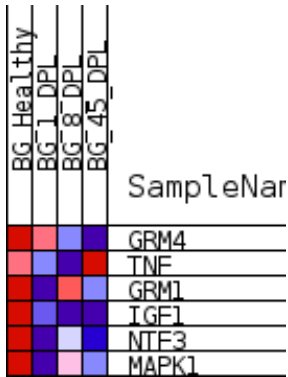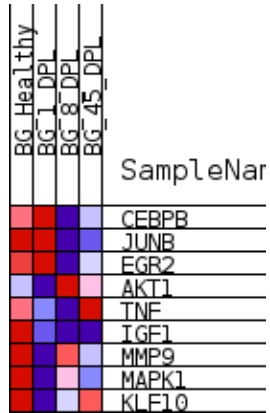

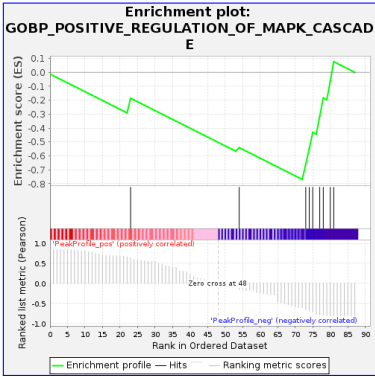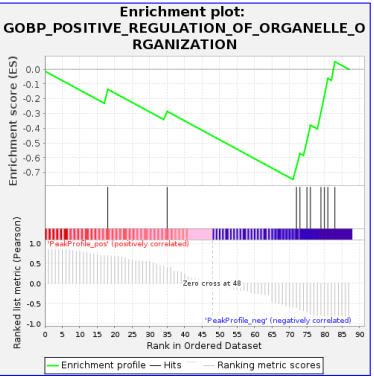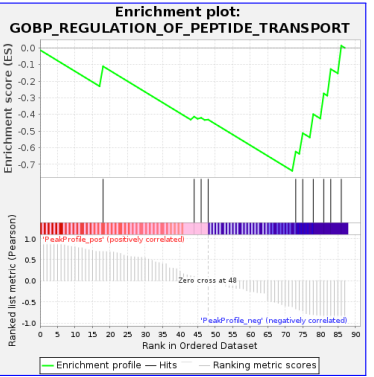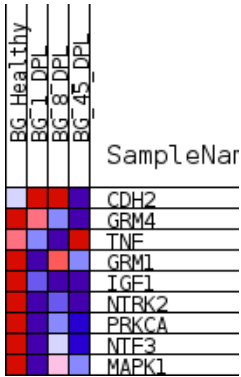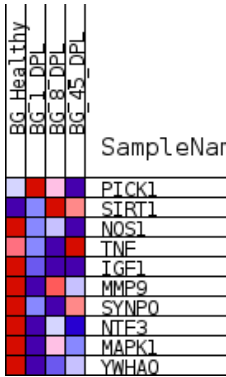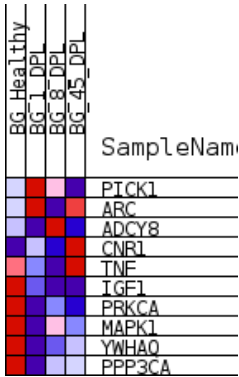

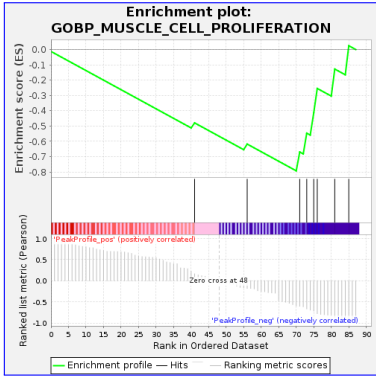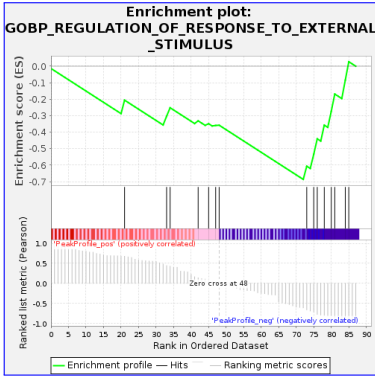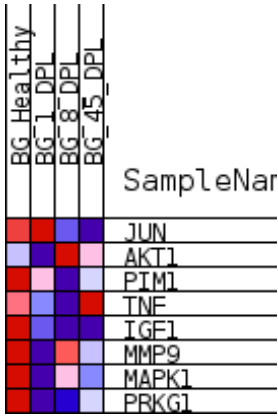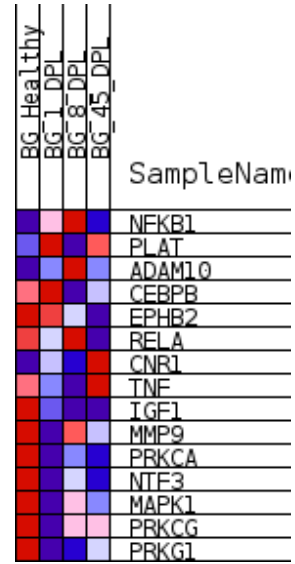

**Figure S26:** Enrichment plots (upper) and corresponding gene set Heatmaps (lower) of CTX-M 1 DPL peak deregulated pathways ( $FDR \leq 0.1$ ). Up-regulated pathways are framed in red, down-regulated in blue.

2.4.7 CTX-M 8 DPL Peak Pathways

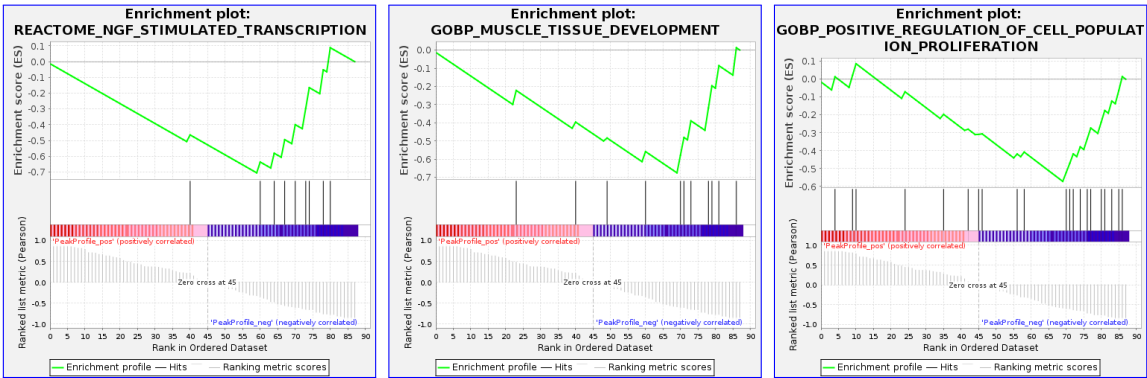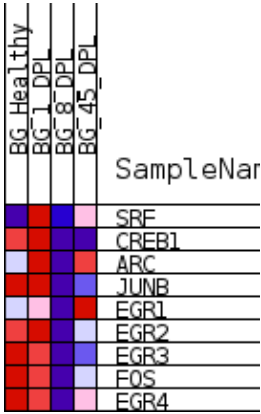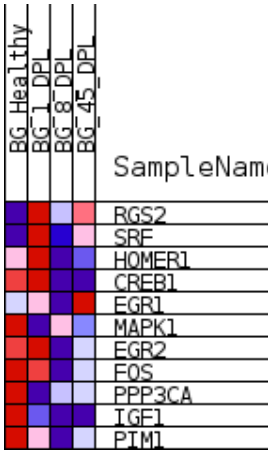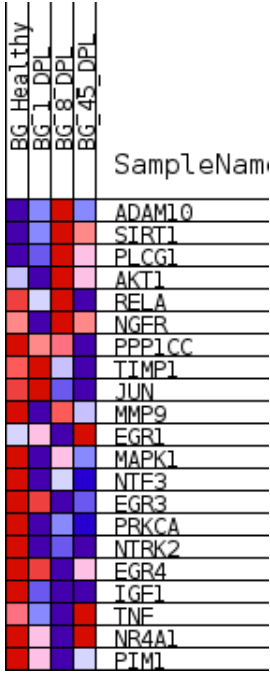

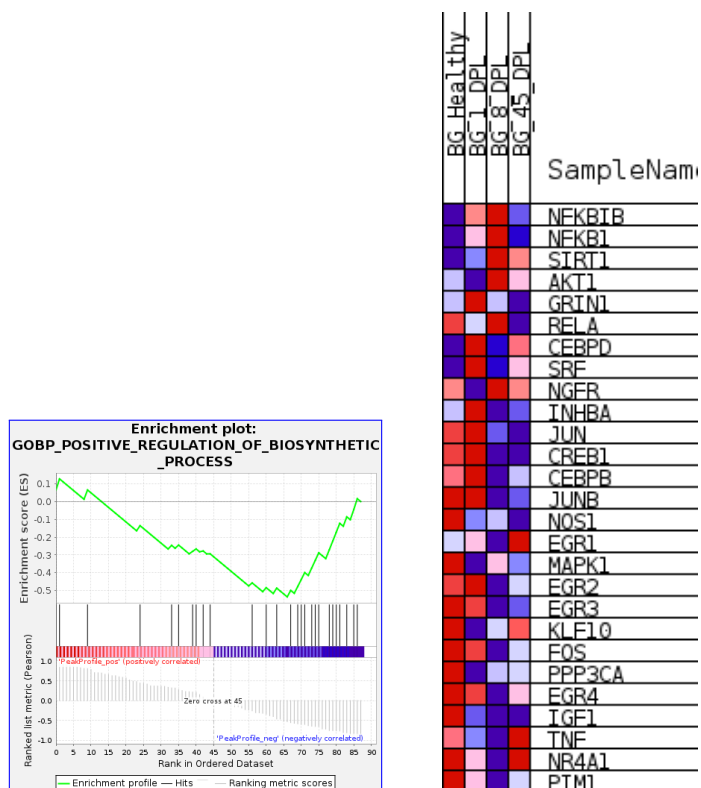

**Figure S27:** Enrichment plots (upper) and corresponding gene set Heatmaps (lower) of CTX-M 8 DPL peak deregulated pathways ( $FDR \leq 0.1$ ). Up-regulated pathways are framed in red, down-regulated in blue.

2.4.8 BG 45 DPL Peak Pathways

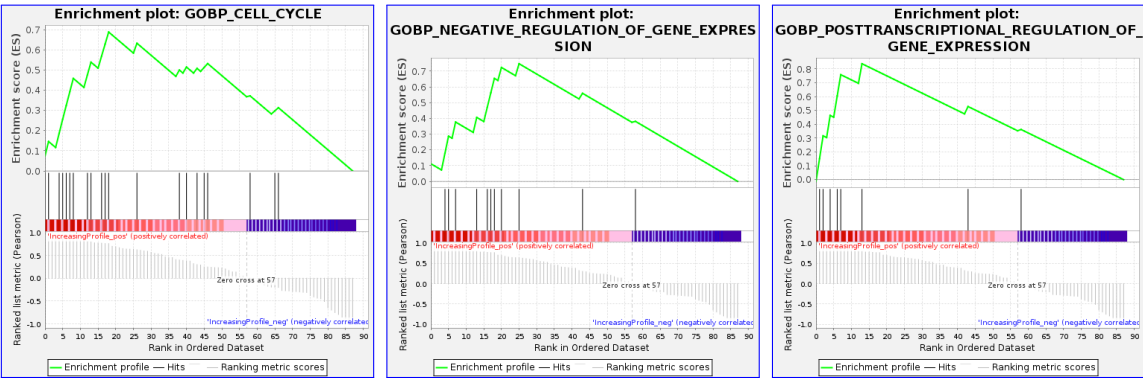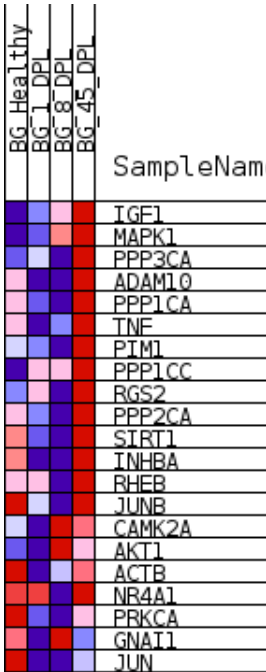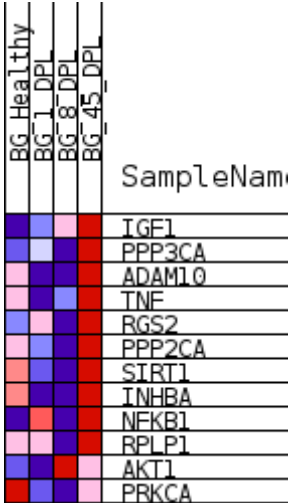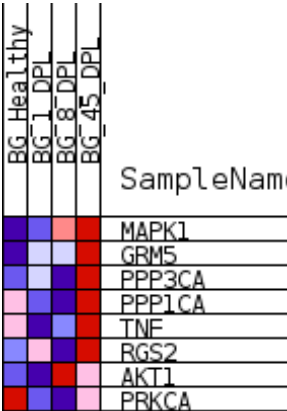

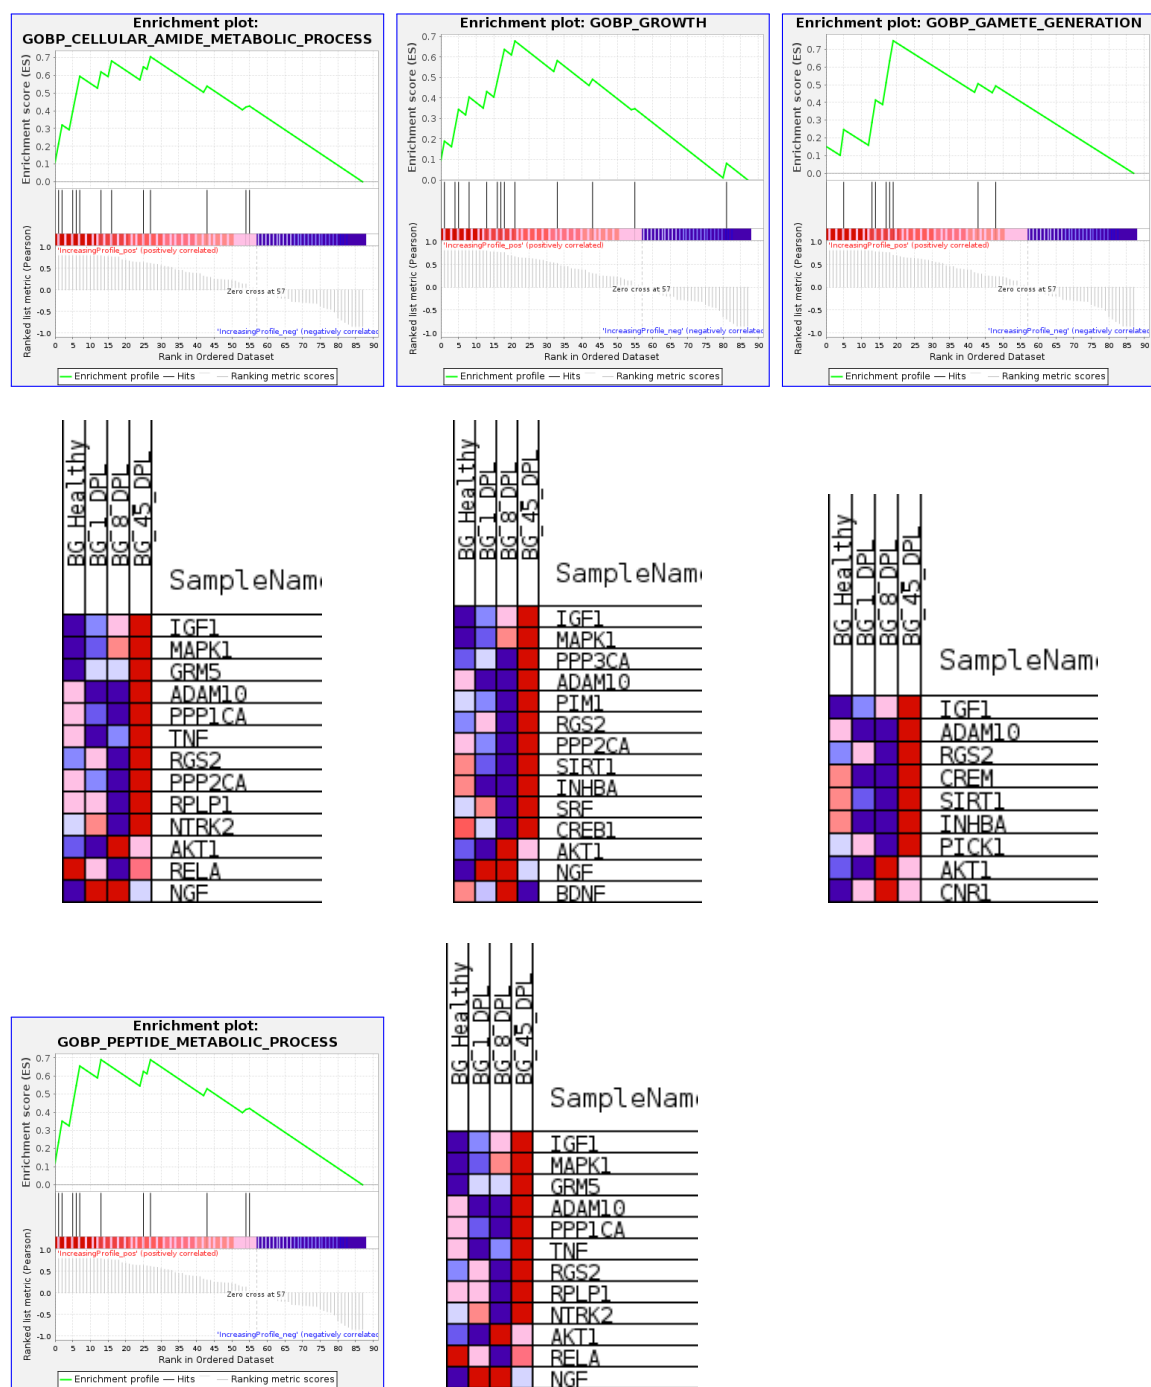

**Figure S28:** Enrichment plots (upper) and corresponding gene set Heatmaps (lower) of BG 45 DPL peak deregulated pathways ( $FDR \leq 0.1$ ). Up-regulated pathways are framed in red, down-regulated in blue.

2.4.9 CB 8 DPL Pathways

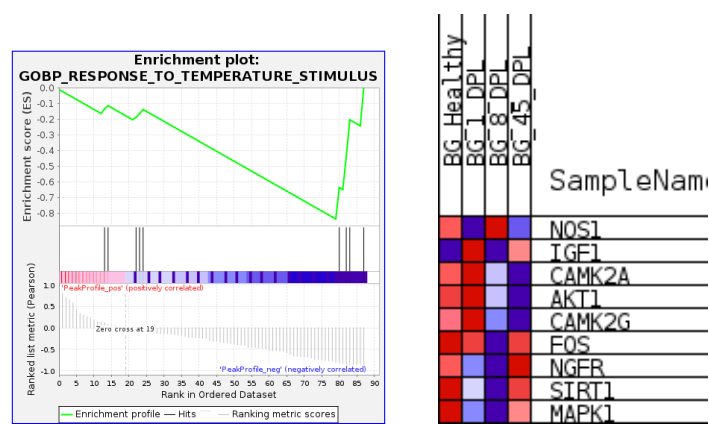

**Figure S29:** Enrichment plots (upper) and corresponding gene set Heatmaps (lower) of CB 8 DPL peak deregulated pathways ( $FDR \leq 0.1$ ). Up-regulated pathways are framed in red, down-regulated in blue.



2.4.10 CB 45 DPL Peak Pathways

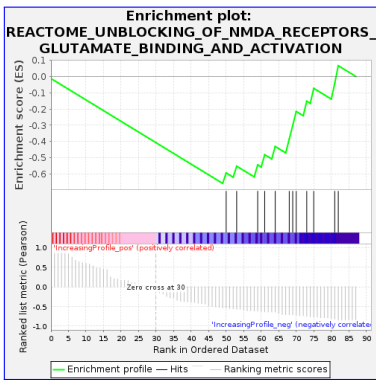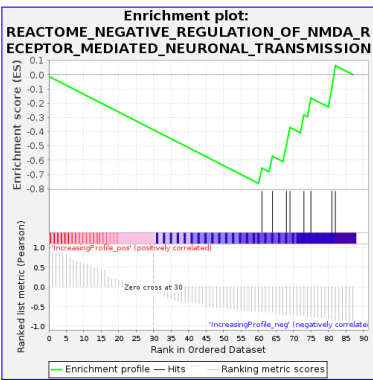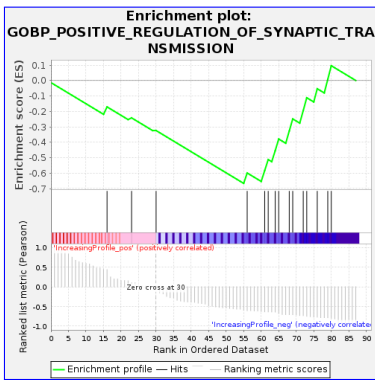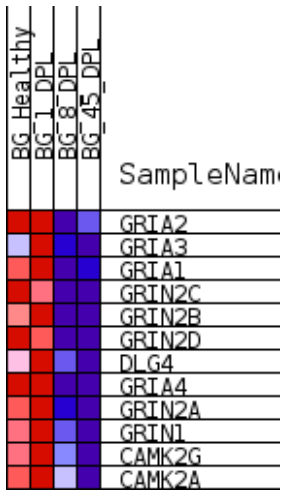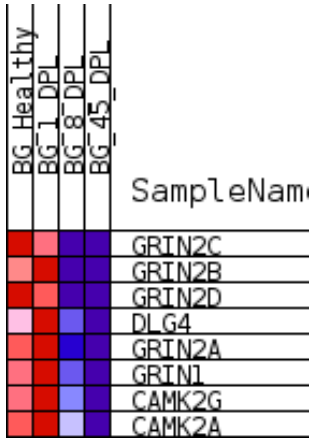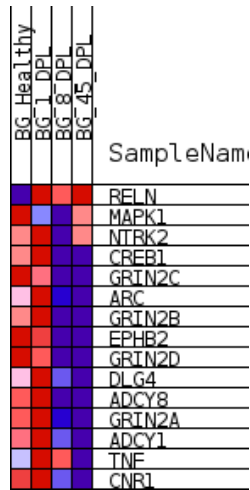

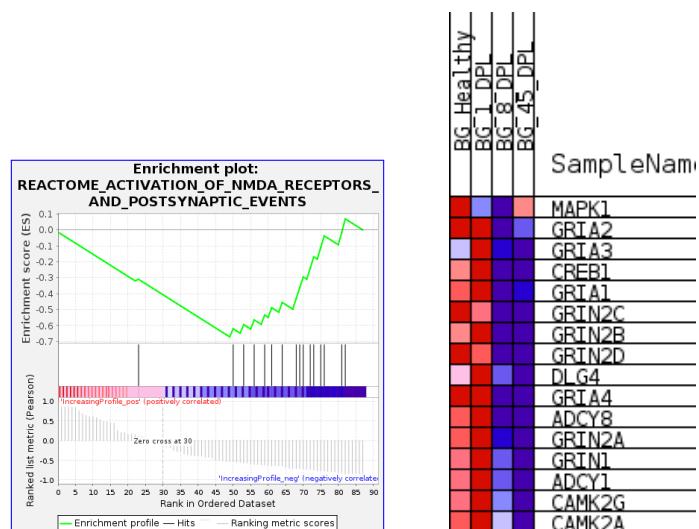

**Figure S30:** Enrichment plots (upper) and corresponding gene set Heatmaps (lower) of CB 45 DPL peak deregulated pathways ( $FDR \leq 0.1$ ). Up-regulated pathways are framed in red, down-regulated in blue.

## List of Figures

|     |                                                                                                                                                                                                               |     |
|-----|---------------------------------------------------------------------------------------------------------------------------------------------------------------------------------------------------------------|-----|
| S1  | Bar plots of SC rostral segment 1, 8 and 45 DPL, Ranked Gene List Pearson Correlation Profile. . . .                                                                                                          | 310 |
| S2  | Bar plots of SC caudal segment 1, 8 and 45 DPL, Ranked Gene List Pearson Correlation Profile. . . .                                                                                                           | 310 |
| S3  | Bar plots of SC cervical segment 1, 8 and 45 DPL, Ranked Gene List Pearson Correlation Profile. . . .                                                                                                         | 310 |
| S4  | Bar plots of CTX-M 1, 8 and 45 DPL, Ranked Gene List Pearson Correlation Profile. . . . .                                                                                                                     | 311 |
| S5  | Bar plots of BG 1, 8 and 45 DPL, Ranked Gene List Pearson Correlation Profile. . . . .                                                                                                                        | 311 |
| S6  | Bar plots of CB 1, 8 and 45 DPL, Ranked Gene List Pearson Correlation Profile. . . . .                                                                                                                        | 311 |
| S7  | Plots of the distribution of SC rostral segment 1, 8 and 45 DPL, NES values. Significant pathways, FDR $\leq 0.25$ , are highlighted in yellow. . . . .                                                       | 312 |
| S8  | Plots of the distributions of SC caudal section's 1, 8 and 45 DPL, NES values. Significant pathways, FDR $\leq 0.25$ , are highlighted in yellow. . . . .                                                     | 312 |
| S9  | Plots of the distributions of SC cervical section's 1, 8 and 45 DPL, NES values. Significant pathways, FDR $\leq 0.25$ , are highlighted in yellow. . . . .                                                   | 313 |
| S10 | Plots of the distributions of CTX-M 1, 8 and 45 DPL, NES values. Significant pathways, FDR $\leq 0.25$ , are highlighted in yellow. . . . .                                                                   | 313 |
| S11 | Plots of the distributions of BG 1, 8 and 45 DPL, NES values. Significant pathways, FDR $\leq 0.25$ , are highlighted in yellow. . . . .                                                                      | 313 |
| S12 | Plots of the distributions of CB 1, 8 and 45 DPL, NES values. Significant pathways, FDR $\leq 0.25$ , are highlighted in yellow. . . . .                                                                      | 314 |
| S13 | SC rostral 1 DPL Leading Edge Analysis results . . . . .                                                                                                                                                      | 315 |
| S14 | SC rostral 45 DPL Leading Edge Analysis results . . . . .                                                                                                                                                     | 315 |
| S15 | SC caudal 1 DPL Leading Edge Analysis results . . . . .                                                                                                                                                       | 315 |
| S16 | SC caudal 8 DPL Leading Edge Analysis results . . . . .                                                                                                                                                       | 315 |
| S17 | CTX-M 1 DPL Leading Edge Analysis results . . . . .                                                                                                                                                           | 316 |
| S18 | CTX-M 8 DPL Leading Edge Analysis results . . . . .                                                                                                                                                           | 316 |
| S19 | BG 45 DPL Leading Edge Analysis results . . . . .                                                                                                                                                             | 316 |
| S20 | CB 45 DPL Leading Edge Analysis results . . . . .                                                                                                                                                             | 316 |
| S21 | Enrichment plots (upper) and corresponding gene set Heatmaps (lower) of SC rostral 1 DPL peak deregulated pathways (FDR $\leq 0.1$ ). Up-regulated pathways are framed in red, down-regulated in blue. . . .  | 320 |
| S22 | Enrichment plots (upper) and corresponding gene set Heatmaps (lower) of SC rostral 8 DPL peak deregulated pathways (FDR $\leq 0.1$ ). Up-regulated pathways are framed in red, down-regulated in blue. . . .  | 321 |
| S23 | Enrichment plots (upper) and corresponding gene set Heatmaps (lower) of SC rostral 45 DPL peak deregulated pathways (FDR $\leq 0.1$ ). Up-regulated pathways are framed in red, down-regulated in blue. . . . | 326 |
| S24 | Enrichment plots (upper) and corresponding gene set Heatmaps (lower) of SC caudal 1 DPL peak deregulated pathways (FDR $\leq 0.1$ ). Up-regulated pathways are framed in red, down-regulated in blue. . . .   | 330 |
| S25 | Enrichment plots (upper) and corresponding gene set Heatmaps (lower) of SC caudal 8 DPL peak deregulated pathways (FDR $\leq 0.1$ ). Up-regulated pathways are framed in red, down-regulated in blue. . . .   | 335 |
| S26 | Enrichment plots (upper) and corresponding gene set Heatmaps (lower) of CTX-M 1 DPL peak deregulated pathways (FDR $\leq 0.1$ ). Up-regulated pathways are framed in red, down-regulated in blue. . . .       | 339 |
| S27 | Enrichment plots (upper) and corresponding gene set Heatmaps (lower) of CTX-M 8 DPL peak deregulated pathways (FDR $\leq 0.1$ ). Up-regulated pathways are framed in red, down-regulated in blue. . . .       | 341 |
| S28 | Enrichment plots (upper) and corresponding gene set Heatmaps (lower) of BG 45 DPL peak deregulated pathways (FDR $\leq 0.1$ ). Up-regulated pathways are framed in red, down-regulated in blue. . . .         | 343 |
| S29 | Enrichment plots (upper) and corresponding gene set Heatmaps (lower) of CB 8 DPL peak deregulated pathways (FDR $\leq 0.1$ ). Up-regulated pathways are framed in red, down-regulated in blue. . . . .        | 344 |
| S30 | Enrichment plots (upper) and corresponding gene set Heatmaps (lower) of CB 45 DPL peak deregulated pathways (FDR $\leq 0.1$ ). Up-regulated pathways are framed in red, down-regulated in blue. . . .         | 346 |

## List of Tables

|    |                                                                     |    |
|----|---------------------------------------------------------------------|----|
| S1 | PARN-126ZA Genes Array Table. . . . .                               | 3  |
| S2 | SC rostral segment early (1 DPL peak) profile GSEA results. . . . . | 7  |
| S3 | SC rostral segment early (8 DPL peak) profile GSEA results. . . . . | 24 |
| S4 | SC rostral segment late (45 DPL peak) profile GSEA results. . . . . | 41 |
| S5 | SC caudal segment early (1 DPL peak) profile GSEA results. . . . .  | 58 |

|            |                                                                              |     |
|------------|------------------------------------------------------------------------------|-----|
| <b>S6</b>  | SC caudal segment early (8 DPL peak) profile GSEA results. . . . .           | 75  |
| <b>S7</b>  | SC caudal segment late (45 DPL peak) profile GSEA results. . . . .           | 92  |
| <b>S8</b>  | SC cervical segment early profile (1 DPL peak) GSEA results. . . . .         | 109 |
| <b>S9</b>  | SC cervical segment early profile (8 DPL peak) GSEA results. . . . .         | 126 |
| <b>S10</b> | SC cervical segment late profile Profile (45 DPL peak) GSEA results. . . . . | 143 |
| <b>S11</b> | CTX-M early profile (1 DPL peak) GSEA results. . . . .                       | 157 |
| <b>S12</b> | CTX-M early profile (8 DPL peak) GSEA results. . . . .                       | 174 |
| <b>S13</b> | CTX-M late profile (45 DPL peak) GSEA results. . . . .                       | 191 |
| <b>S14</b> | BG early profile (1 DPL peak) GSEA results. . . . .                          | 208 |
| <b>S15</b> | BG early profile (8 DPL peak) GSEA results. . . . .                          | 225 |
| <b>S16</b> | BG late profile (45 DPL peak) GSEA results. . . . .                          | 242 |
| <b>S17</b> | CB early profile (1 DPL peak) GSEA results. . . . .                          | 259 |
| <b>S18</b> | CB early profile (8 DPL peak) GSEA results. . . . .                          | 276 |
| <b>S19</b> | CB late profile (45 DPL peak) GSEA results. . . . .                          | 293 |
